# Supplementary material for: M6O4(OH)4 of M = Sn, Pb: Single Crystal Growth and Crystal Structure Determinations Far Away from Routine
Source: MDPI journal article supplement (doi:10.3390/cryst13050739), 2023-04-27

```
R(reflections)= 0.0400( 654)      wR2(reflections)=
S = 1.263                        0.0841( 657)
Npar= 20
```

---

The following ALERTS were generated. Each ALERT has the format

**test-name\_ALERT\_alert-type\_alert-level.**

Click on the hyperlinks for more details of the test.

---

### Alert level A

|                   |                          |                             |     |            |
|-------------------|--------------------------|-----------------------------|-----|------------|
| PLAT213_ALERT_2_A | Atom O1                  | has ADP max/min Ratio ..... | 5.6 | prolat     |
| PLAT975_ALERT_2_A | Check Calcd Resid. Dens. | 0.43Ang From O1             | .   | 3.46 eA-3  |
| PLAT975_ALERT_2_A | Check Calcd Resid. Dens. | 0.51Ang From O1             | .   | 3.16 eA-3  |
| PLAT976_ALERT_2_A | Check Calcd Resid. Dens. | 0.93Ang From O1             | .   | -2.50 eA-3 |
| PLAT976_ALERT_2_A | Check Calcd Resid. Dens. | 0.80Ang From O1             | .   | -2.17 eA-3 |

---

### Alert level B

|                   |                                                |                 |            |
|-------------------|------------------------------------------------|-----------------|------------|
| PLAT241_ALERT_2_B | High 'MainMol' Ueq as Compared to Neighbors of | O1              | Check      |
| PLAT971_ALERT_2_B | Check Calcd Resid. Dens.                       | 0.43Ang From O1 | 3.46 eA-3  |
| PLAT971_ALERT_2_B | Check Calcd Resid. Dens.                       | 0.51Ang From O1 | 3.16 eA-3  |
| PLAT972_ALERT_2_B | Check Calcd Resid. Dens.                       | 0.13Ang From O1 | -3.34 eA-3 |

---

### Alert level C

DIFMX02\_ALERT\_1\_C The maximum difference density is > 0.1\*ZMAX\*0.75

The relevant atom site should be identified.

|                   |                                                  |                  |              |
|-------------------|--------------------------------------------------|------------------|--------------|
| PLAT043_ALERT_1_C | Calculated and Reported Mol. Weight Differ by .. | 3.91             | Check        |
| PLAT068_ALERT_1_C | Reported F000 Differs from Calcd (or Missing)... |                  | Please Check |
| PLAT097_ALERT_2_C | Large Reported Max. (Positive) Residual Density  | 3.87             | eA-3         |
| PLAT906_ALERT_3_C | Large K Value in the Analysis of Variance .....  | 3.885            | Check        |
| PLAT971_ALERT_2_C | Check Calcd Resid. Dens.                         | 1.94Ang From Sn1 | 2.11 eA-3    |
| PLAT971_ALERT_2_C | Check Calcd Resid. Dens.                         | 2.03Ang From Sn1 | 1.65 eA-3    |
| PLAT971_ALERT_2_C | Check Calcd Resid. Dens.                         | 0.79Ang From Sn1 | 1.60 eA-3    |
| PLAT971_ALERT_2_C | Check Calcd Resid. Dens.                         | 1.45Ang From Sn1 | 1.60 eA-3    |
| PLAT972_ALERT_2_C | Check Calcd Resid. Dens.                         | 0.93Ang From O1  | -2.50 eA-3   |
| PLAT972_ALERT_2_C | Check Calcd Resid. Dens.                         | 0.80Ang From O1  | -2.17 eA-3   |
| PLAT972_ALERT_2_C | Check Calcd Resid. Dens.                         | 1.40Ang From Sn1 | -1.97 eA-3   |
| PLAT972_ALERT_2_C | Check Calcd Resid. Dens.                         | 0.70Ang From Sn1 | -1.94 eA-3   |
| PLAT972_ALERT_2_C | Check Calcd Resid. Dens.                         | 2.09Ang From O1  | -1.55 eA-3   |
| PLAT975_ALERT_2_C | Check Calcd Resid. Dens.                         | 0.93Ang From O1  | . 0.92 eA-3  |
| PLAT975_ALERT_2_C | Check Calcd Resid. Dens.                         | 1.07Ang From O1  | . 0.90 eA-3  |

---

### Alert level G

FORMU01\_ALERT\_2\_G There is a discrepancy between the atom counts in the  
\_chemical\_formula\_sum and the formula from the \_atom\_site\* data.

Atom count from \_chemical\_formula\_sum: H4 O8 Sn6

Atom count from the \_atom\_site data: O8 Sn6

CELLZ01\_ALERT\_1\_G Difference between formula and atom\_site contents detected.

CELLZ01\_ALERT\_1\_G WARNING: H atoms missing from atom site list. Is this intentional?

From the CIF: \_cell\_formula\_units\_Z 2

From the CIF: \_chemical\_formula\_sum H4 O8 Sn6

TEST: Compare cell contents of formula and atom\_site data

| atom | Z*formula | cif sites | diff |
|------|-----------|-----------|------|
| H    | 8.00      | 0.00      | 8.00 |
| O    | 16.00     | 16.00     | 0.00 |
| Sn   | 12.00     | 12.00     | 0.00 |

|                                                                    |       |              |
|--------------------------------------------------------------------|-------|--------------|
| PLAT019_ALERT_1_G _diffn_measured_fraction_theta_full/*_max < 1.0  | 0.998 | Report       |
| PLAT083_ALERT_2_G SHELXL Second Parameter in WGHT Unusually Large  | 24.97 | Why ?        |
| PLAT304_ALERT_4_G Non-Integer Number of Atoms in ..... (Resd 1 )   | 12.25 | Check        |
| PLAT794_ALERT_5_G Tentative Bond Valency for Sn1 (II) .            | 1.94  | Info         |
| PLAT794_ALERT_5_G Tentative Bond Valency for Sn2 (II) .            | 1.94  | Info         |
| PLAT910_ALERT_3_G Missing # of FCF Reflection(s) Below Theta(Min). | 1     | Note         |
| PLAT933_ALERT_2_G Number of HKL-OMIT Records in Embedded .res File | 1     | Note         |
| PLAT961_ALERT_5_G Dataset Contains no Negative Intensities .....   |       | Please Check |
| PLAT967_ALERT_5_G Note: Two-Theta Cutoff Value in Embedded .res .. | 70.0  | Degree       |

---

5 **ALERT level A** = Most likely a serious problem - resolve or explain  
 4 **ALERT level B** = A potentially serious problem, consider carefully  
 16 **ALERT level C** = Check. Ensure it is not caused by an omission or oversight  
 12 **ALERT level G** = General information/check it is not something unexpected

6 ALERT type 1 CIF construction/syntax error, inconsistent or missing data  
 24 ALERT type 2 Indicator that the structure model may be wrong or deficient  
 2 ALERT type 3 Indicator that the structure quality may be low  
 1 ALERT type 4 Improvement, methodology, query or suggestion  
 4 ALERT type 5 Informative message, check

---

It is advisable to attempt to resolve as many as possible of the alerts in all categories. Often the minor alerts point to easily fixed oversights, errors and omissions in your CIF or refinement strategy, so attention to these fine details can be worthwhile. In order to resolve some of the more serious problems it may be necessary to carry out additional measurements or structure refinements. However, the purpose of your study may justify the reported deviations and the more serious of these should normally be commented upon in the discussion or experimental section of a paper or in the "special\_details" fields of the CIF. checkCIF was carefully designed to identify outliers and unusual parameters, but every test has its limitations and alerts that are not important in a particular case may appear. Conversely, the absence of alerts does not guarantee there are no aspects of the results needing attention. It is up to the individual to critically assess their own results and, if necessary, seek expert advice.

### Publication of your CIF in IUCr journals

A basic structural check has been run on your CIF. These basic checks will be run on all CIFs submitted for publication in IUCr journals (*Acta Crystallographica*, *Journal of Applied Crystallography*, *Journal of Synchrotron Radiation*); however, if you intend to submit to *Acta Crystallographica Section C* or *E* or *IUCrData*, you should make sure that full publication checks are run on the final version of your CIF prior to submission.

### Publication of your CIF in other journals

Please refer to the *Notes for Authors* of the relevant journal for any special instructions relating to CIF submission.

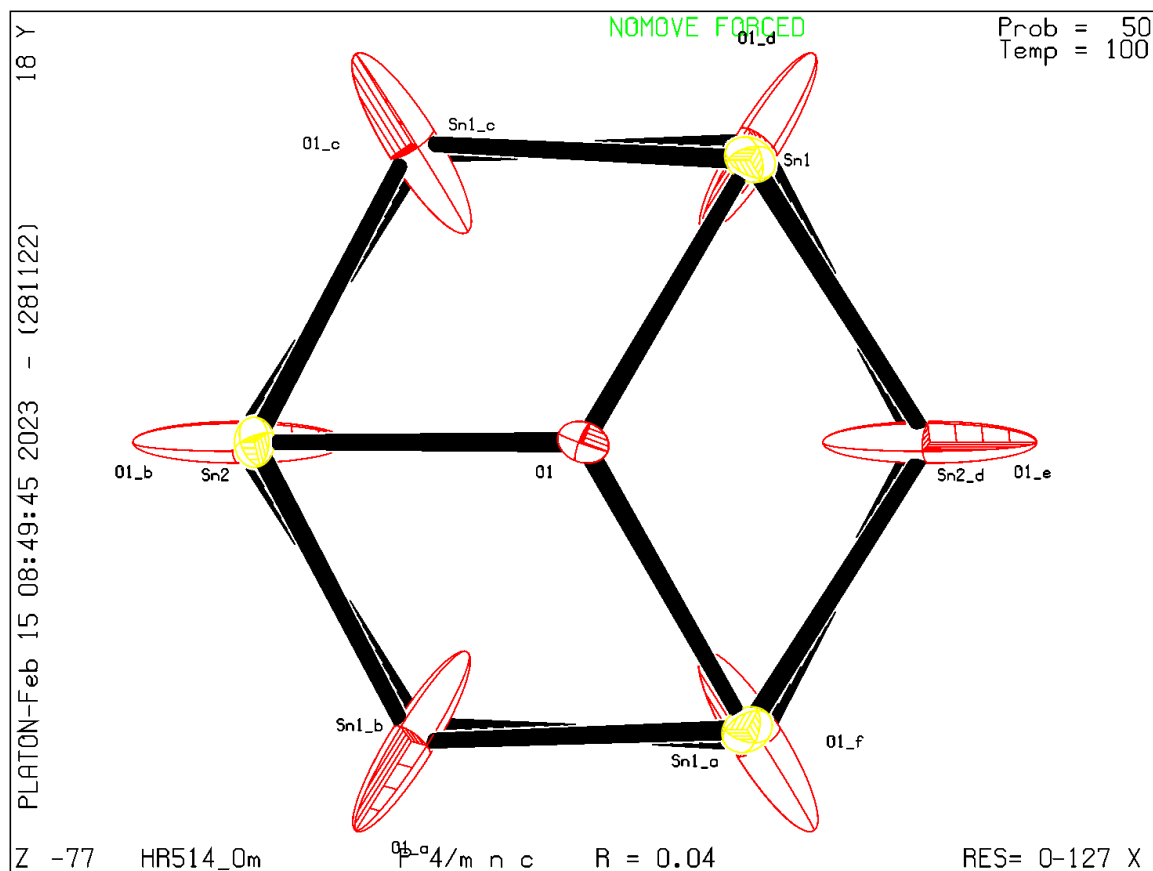

Supplement: s1 [file s1 › crystals-2348544-supplementary/checkcif Sn6O4(OH)4 structure model_I.pdf]
