# Supplementary material for: M6O4(OH)4 of M = Sn, Pb: Single Crystal Growth and Crystal Structure Determinations Far Away from Routine
Source: MDPI journal article supplement (doi:10.3390/cryst13050739), 2023-04-27
Supplement: s1 [file s1]

Archive with 13 entries (13 files):
- crystals-2348544-supplementary/checkcif Pb6O4(OH)4 structure model_I.pdf
- crystals-2348544-supplementary/checkcif Pb6O4(OH)4 structure model_II.pdf
- crystals-2348544-supplementary/checkcif Pb6O4(OH)4 structure model_III.pdf
- crystals-2348544-supplementary/checkcif Sn6O4(OH)4 structure model_I.pdf
- crystals-2348544-supplementary/checkcif Sn6O4(OH)4 structure model_II.pdf
- crystals-2348544-supplementary/checkcif Sn6O4(OH)4 structure model_III.pdf
- crystals-2348544-supplementary/Pb6O4(OH)4 structure model_III.cif
- crystals-2348544-supplementary/Sn6O4(OH) structure model_III.cif
- crystals-2348544-supplementary/Supplementary Data.pdf
- crystals-2348544-supplementary/Tabellen Pb6O4(OH)4_I.pdf
- crystals-2348544-supplementary/Tabellen Pb6O4(OH)4_II.pdf
- crystals-2348544-supplementary/Tabellen Sn6O4(OH)4_I.pdf
- crystals-2348544-supplementary/Tabellen Sn6O4(OH)4_II.pdf
