# Supplementary material for: M6O4(OH)4 of M = Sn, Pb: Single Crystal Growth and Crystal Structure Determinations Far Away from Routine
Source: MDPI journal article supplement (doi:10.3390/cryst13050739), 2023-04-27
Supplement: s1 [file s1 › crystals-2348544-supplementary/Pb6O4(OH)4 structure model_III.cif]

 
data_KP2002_0m_d 
  
_audit_creation_method            'SHELXL-2014/7' 
_shelx_SHELXL_version_number      '2014/7' 
_chemical_name_systematic         ? 
_chemical_name_common             ? 
_chemical_melting_point           ? 
_chemical_formula_moiety          ? 
_chemical_formula_sum 
 'H4 O8 Pb6' 
_chemical_formula_weight          1375.17 
  
loop_ 
 _atom_type_symbol 
 _atom_type_description 
 _atom_type_scat_dispersion_real 
 _atom_type_scat_dispersion_imag 
 _atom_type_scat_source 
 'O'  'O'   0.0106   0.0060 
 'International Tables Vol C Tables 4.2.6.8 and 6.1.1.4' 
 'H'  'H'   0.0000   0.0000 
 'International Tables Vol C Tables 4.2.6.8 and 6.1.1.4' 
 'Pb'  'Pb'  -3.3944  10.1111 
 'International Tables Vol C Tables 4.2.6.8 and 6.1.1.4' 
  
_space_group_crystal_system       tetragonal 
_space_group_IT_number            114 
_space_group_name_H-M_alt         'P -4 21 c' 
_space_group_name_Hall            'P -4 2n' 
  
_shelx_space_group_comment 
; 
The symmetry employed for this shelxl refinement is uniquely defined 
by the following loop, which should always be used as a source of 
symmetry information in preference to the above space-group names. 
They are only intended as comments. 
; 
  
loop_ 
 _space_group_symop_operation_xyz 
 'x, y, z' 
 '-x, -y, z' 
 'y, -x, -z' 
 '-y, x, -z' 
 '-x+1/2, y+1/2, -z+1/2' 
 'x+1/2, -y+1/2, -z+1/2' 
 '-y+1/2, -x+1/2, z+1/2' 
 'y+1/2, x+1/2, z+1/2' 
  
_cell_length_a                    7.9693(3) 
_cell_length_b                    7.9693(3) 
_cell_length_c                    9.2741(3) 
_cell_angle_alpha                 90 
_cell_angle_beta                  90 
_cell_angle_gamma                 90 
_cell_volume                      589.00(5) 
_cell_formula_units_Z             2 
_cell_measurement_temperature     100(2) 
_cell_measurement_reflns_used     9947 
_cell_measurement_theta_min       3.37 
_cell_measurement_theta_max       34.62 
  
_exptl_crystal_description        bloc 
_exptl_crystal_colour             colourless 
_exptl_crystal_density_meas       ? 
_exptl_crystal_density_method     ? 
_exptl_crystal_density_diffrn     7.754 
_exptl_crystal_F_000              1120 
_exptl_transmission_factor_min    ? 
_exptl_transmission_factor_max    ? 
_exptl_crystal_size_max           0.020 
_exptl_crystal_size_mid           0.010 
_exptl_crystal_size_min           0.010 
_exptl_absorpt_coefficient_mu     85.455 
_shelx_estimated_absorpt_T_min    0.280 
_shelx_estimated_absorpt_T_max    0.482 
_exptl_absorpt_correction_type    multi-scan 
_exptl_absorpt_correction_T_min   0.414 
_exptl_absorpt_correction_T_max   0.752 
_exptl_absorpt_process_details    'Bruker SADABS' 
_exptl_absorpt_special_details    ? 
_diffrn_ambient_temperature       100(2) 
_diffrn_radiation_wavelength      0.71073 
_diffrn_radiation_type            MoK\a 
_diffrn_source                    ? 
_diffrn_measurement_device_type   'Bruker APEX-II CCD' 
_diffrn_measurement_method        '\f and \w scans' 
_diffrn_detector_area_resol_mean  ? 
_diffrn_reflns_number             116076 
_diffrn_reflns_av_unetI/netI      0.0167 
_diffrn_reflns_av_R_equivalents   0.0999 
_diffrn_reflns_limit_h_min        -12 
_diffrn_reflns_limit_h_max        12 
_diffrn_reflns_limit_k_min        -12 
_diffrn_reflns_limit_k_max        12 
_diffrn_reflns_limit_l_min        -14 
_diffrn_reflns_limit_l_max        14 
_diffrn_reflns_theta_min          3.371 
_diffrn_reflns_theta_max          34.939 
_diffrn_reflns_theta_full         25.242 
_diffrn_measured_fraction_theta_max   1.000 
_diffrn_measured_fraction_theta_full  1.000 
_diffrn_reflns_Laue_measured_fraction_max    1.000 
_diffrn_reflns_Laue_measured_fraction_full   1.000 
_diffrn_reflns_point_group_measured_fraction_max   1.000 
_diffrn_reflns_point_group_measured_fraction_full  1.000 
_reflns_number_total              1304 
_reflns_number_gt                 1183 
_reflns_threshold_expression      'I > 2\s(I)' 
_reflns_Friedel_coverage          0.720 
_reflns_Friedel_fraction_max      1.000 
_reflns_Friedel_fraction_full     1.000 
  
_reflns_special_details 
; 
 Reflections were merged by SHELXL according to the crystal 
 class for the calculation of statistics and refinement. 
  
 _reflns_Friedel_fraction is defined as the number of unique 
 Friedel pairs measured divided by the number that would be 
 possible theoretically, ignoring centric projections and 
 systematic absences. 
; 
  
_computing_data_collection        'Bruker APEX2' 
_computing_cell_refinement        'Bruker SAINT' 
_computing_data_reduction         'Bruker SAINT' 
_computing_structure_solution     'SHELXS-97 (Sheldrick 2008)' 
_computing_structure_refinement 'SHELXL-2014/7 (Sheldrick, 2014)' 
_computing_molecular_graphics     'Bruker SHELXTL' 
_computing_publication_material   'Bruker SHELXTL' 
_refine_special_details           ? 
_refine_ls_structure_factor_coef  Fsqd 
_refine_ls_matrix_type            full 
_refine_ls_weighting_scheme       calc 
_refine_ls_weighting_details 
'w=1/[\s^2^(Fo^2^)+(0.0080P)^2^+5.5214P] where P=(Fo^2^+2Fc^2^)/3' 
_atom_sites_solution_primary      direct 
_atom_sites_solution_secondary    ? 
_atom_sites_solution_hydrogens    difmap 
_refine_ls_hydrogen_treatment     refU 
_refine_ls_extinction_method      'SHELXL-2014/7 (Sheldrick 2014' 
_refine_ls_extinction_coef        0.00132(6) 
_refine_ls_extinction_expression 
 'Fc^*^=kFc[1+0.001xFc^2^\l^3^/sin(2\q)]^-1/4^' 
_refine_ls_abs_structure_details 
; 
 Flack x determined using 485 quotients [(I+)-(I-)]/[(I+)+(I-)] 
 (Parsons, Flack and Wagner, Acta Cryst. B69 (2013) 249-259). 
; 
_refine_ls_abs_structure_Flack    0.021(15) 
_chemical_absolute_configuration  ? 
_refine_ls_number_reflns          1304 
_refine_ls_number_parameters      35 
_refine_ls_number_restraints      0 
_refine_ls_R_factor_all           0.0196 
_refine_ls_R_factor_gt            0.0156 
_refine_ls_wR_factor_ref          0.0320 
_refine_ls_wR_factor_gt           0.0311 
_refine_ls_goodness_of_fit_ref    1.109 
_refine_ls_restrained_S_all       1.109 
_refine_ls_shift/su_max           0.001 
_refine_ls_shift/su_mean          0.000 
  
loop_ 
 _atom_site_label 
 _atom_site_type_symbol 
 _atom_site_fract_x 
 _atom_site_fract_y 
 _atom_site_fract_z 
 _atom_site_U_iso_or_equiv 
 _atom_site_adp_type 
 _atom_site_occupancy 
 _atom_site_site_symmetry_order 
 _atom_site_calc_flag 
 _atom_site_refinement_flags_posn 
 _atom_site_refinement_flags_adp 
 _atom_site_refinement_flags_occupancy 
 _atom_site_disorder_assembly 
 _atom_site_disorder_group 
Pb1 Pb 0.20007(2) 0.63368(3) 0.50144(6) 0.00813(6) Uani 1 1 d . . . . . 
Pb2 Pb 0.5000 0.5000 0.22128(3) 0.00713(7) Uani 1 2 d S T P . . 
O1 O 0.2397(7) 0.4001(7) 0.3290(6) 0.0074(9) Uani 1 1 d . . . . . 
H1 H 0.1728 0.3601 0.2501 0.02(2) Uiso 1 1 d R . . . . 
O2 O 0.4243(7) 0.6963(7) 0.3756(6) 0.0072(9) Uani 1 1 d . . . . . 
  
loop_ 
 _atom_site_aniso_label 
 _atom_site_aniso_U_11 
 _atom_site_aniso_U_22 
 _atom_site_aniso_U_33 
 _atom_site_aniso_U_23 
 _atom_site_aniso_U_13 
 _atom_site_aniso_U_12 
Pb1 0.00504(9) 0.00928(10) 0.01007(10) 0.0018(3) 0.0006(3) 0.00251(6) 
Pb2 0.0101(5) 0.0077(4) 0.00357(11) 0.000 0.000 0.0007(6) 
O1 0.006(2) 0.009(2) 0.007(2) -0.0037(18) -0.0024(18) -0.0010(18) 
O2 0.008(2) 0.007(2) 0.006(2) 0.0011(18) 0.0000(18) 0.0017(18) 
  
_geom_special_details 
; 
 All esds (except the esd in the dihedral angle between two l.s. planes) 
 are estimated using the full covariance matrix.  The cell esds are taken 
 into account individually in the estimation of esds in distances, angles 
 and torsion angles; correlations between esds in cell parameters are only 
 used when they are defined by crystal symmetry.  An approximate (isotropic) 
 treatment of cell esds is used for estimating esds involving l.s. planes. 
; 
  
loop_ 
 _geom_bond_atom_site_label_1 
 _geom_bond_atom_site_label_2 
 _geom_bond_distance 
 _geom_bond_site_symmetry_2 
 _geom_bond_publ_flag 
Pb1 O2 2.184(5) 4_656 ? 
Pb1 O2 2.192(5) . ? 
Pb1 O1 2.456(6) 3_566 ? 
Pb1 O1 2.474(5) . ? 
Pb1 Pb2 3.6689(5) 3_566 ? 
Pb1 Pb2 3.6877(5) . ? 
Pb2 O2 2.204(5) . ? 
Pb2 O2 2.204(5) 2_665 ? 
Pb2 O1 2.436(6) 2_665 ? 
Pb2 O1 2.436(6) . ? 
Pb2 Pb1 3.6689(5) 3_566 ? 
Pb2 Pb1 3.6689(5) 4_656 ? 
Pb2 Pb1 3.6877(5) 2_665 ? 
O1 Pb1 2.456(6) 4_656 ? 
O1 H1 0.9600 . ? 
O2 Pb1 2.184(5) 3_566 ? 
  
loop_ 
 _geom_angle_atom_site_label_1 
 _geom_angle_atom_site_label_2 
 _geom_angle_atom_site_label_3 
 _geom_angle 
 _geom_angle_site_symmetry_1 
 _geom_angle_site_symmetry_3 
 _geom_angle_publ_flag 
O2 Pb1 O2 98.3(3) 4_656 . ? 
O2 Pb1 O1 74.6(2) 4_656 3_566 ? 
O2 Pb1 O1 73.64(19) . 3_566 ? 
O2 Pb1 O1 73.40(19) 4_656 . ? 
O2 Pb1 O1 73.91(19) . . ? 
O1 Pb1 O1 129.8(2) 3_566 . ? 
O2 Pb1 Pb2 33.44(14) 4_656 3_566 ? 
O2 Pb1 Pb2 84.73(14) . 3_566 ? 
O1 Pb1 Pb2 41.20(13) 3_566 3_566 ? 
O1 Pb1 Pb2 98.70(13) . 3_566 ? 
O2 Pb1 Pb2 84.37(15) 4_656 . ? 
O2 Pb1 Pb2 33.08(14) . . ? 
O1 Pb1 Pb2 98.57(13) 3_566 . ? 
O1 Pb1 Pb2 40.93(13) . . ? 
Pb2 Pb1 Pb2 89.293(8) 3_566 . ? 
O2 Pb2 O2 99.0(3) . 2_665 ? 
O2 Pb2 O1 74.6(2) . 2_665 ? 
O2 Pb2 O1 74.5(2) 2_665 2_665 ? 
O2 Pb2 O1 74.5(2) . . ? 
O2 Pb2 O1 74.6(2) 2_665 . ? 
O1 Pb2 O1 131.6(3) 2_665 . ? 
O2 Pb2 Pb1 33.09(14) . 3_566 ? 
O2 Pb2 Pb1 85.85(15) 2_665 3_566 ? 
O1 Pb2 Pb1 41.62(13) 2_665 3_566 ? 
O1 Pb2 Pb1 99.94(13) . 3_566 ? 
O2 Pb2 Pb1 85.85(15) . 4_656 ? 
O2 Pb2 Pb1 33.09(14) 2_665 4_656 ? 
O1 Pb2 Pb1 99.94(13) 2_665 4_656 ? 
O1 Pb2 Pb1 41.62(13) . 4_656 ? 
Pb1 Pb2 Pb1 91.003(15) 3_566 4_656 ? 
O2 Pb2 Pb1 85.70(14) . 2_665 ? 
O2 Pb2 Pb1 32.87(14) 2_665 2_665 ? 
O1 Pb2 Pb1 41.71(13) 2_665 2_665 ? 
O1 Pb2 Pb1 99.70(13) . 2_665 ? 
Pb1 Pb2 Pb1 60.408(5) 3_566 2_665 ? 
Pb1 Pb2 Pb1 60.408(4) 4_656 2_665 ? 
O2 Pb2 Pb1 32.87(14) . . ? 
O2 Pb2 Pb1 85.70(14) 2_665 . ? 
O1 Pb2 Pb1 99.70(13) 2_665 . ? 
O1 Pb2 Pb1 41.71(13) . . ? 
Pb1 Pb2 Pb1 60.408(5) 3_566 . ? 
Pb1 Pb2 Pb1 60.408(5) 4_656 . ? 
Pb1 Pb2 Pb1 90.410(15) 2_665 . ? 
Pb2 O1 Pb1 97.2(2) . 4_656 ? 
Pb2 O1 Pb1 97.4(2) . . ? 
Pb1 O1 Pb1 97.30(19) 4_656 . ? 
Pb2 O1 H1 105.6 . . ? 
Pb1 O1 H1 120.0 4_656 . ? 
Pb1 O1 H1 132.2 . . ? 
Pb1 O2 Pb1 115.5(2) 3_566 . ? 
Pb1 O2 Pb2 113.5(2) 3_566 . ? 
Pb1 O2 Pb2 114.1(2) . . ? 
  
loop_ 
 _geom_hbond_atom_site_label_D 
 _geom_hbond_atom_site_label_H 
 _geom_hbond_atom_site_label_A 
 _geom_hbond_distance_DH 
 _geom_hbond_distance_HA 
 _geom_hbond_distance_DA 
 _geom_hbond_angle_DHA 
 _geom_hbond_site_symmetry_A 
O1 H1 O2  0.96 1.91 2.819(9) 156.3 5_545 
  
_refine_diff_density_max    1.197 
_refine_diff_density_min   -1.819 
_refine_diff_density_rms    0.263 
  
_shelx_res_file 
; 
  
    KP2002_0m_d.res created by SHELXL-2014/7 
  
  
TITL KP2002_0m_d.res in P-42(1)c 
CELL  0.71073   7.9693   7.9693   9.2741   90.000   90.000   90.000 
ZERR    2.000   0.0003   0.0003   0.0003    0.000    0.000    0.000 
LATT -1 
SYMM -X, -Y, Z 
SYMM Y, -X, -Z 
SYMM -Y, X, -Z 
SYMM 1/2-X, 1/2+Y, 1/2-Z 
SYMM 1/2+X, 1/2-Y, 1/2-Z 
SYMM 1/2-Y, 1/2-X, 1/2+Z 
SYMM 1/2+Y, 1/2+X, 1/2+Z 
SFAC O  H  Pb 
UNIT 16  8  12 
LIST 4 ! automatically inserted. Change 6 to 4 for CHECKCIF!! 
OMIT -3 70 
MPLA 3 Pb1 Pb2 Pb1_$20 O1 
MPLA 3 Pb1 Pb1_$20 Pb2_$20 O2 
EQIV $20 y,1-x,1-z 
  
L.S. 10 
ACTA 
BOND $H 
FMAP 2 
PLAN 5 
SIZE 0.01 0.01 0.02 
rem DFIX 0.96 0.0001 O1 H1 
TEMP -173 
rem MORE 3 
HTAB 
EQIV $21 -x+1/2, y-1/2, -z+1/2 
HTAB O1 O2_$21 
WGHT    0.008000    5.521400 
EXTI    0.001319 
FVAR       0.16776 
PB1   3    0.200066    0.633683    0.501444    11.00000    0.00504    0.00928 = 
         0.01007    0.00178    0.00059    0.00251 
PB2   3    0.500000    0.500000    0.221279    10.50000    0.01014    0.00769 = 
         0.00357    0.00000    0.00000    0.00075 
O1    1    0.239724    0.400120    0.329007    11.00000    0.00572    0.00895 = 
         0.00742   -0.00369   -0.00240   -0.00095 
AFIX   3 
H1    2    0.172808    0.360091    0.250105    11.00000    0.01641 
AFIX   0 
O2    1    0.424257    0.696256    0.375589    11.00000    0.00795    0.00712 = 
         0.00645    0.00115    0.00002    0.00171 
  
HKLF 4 
  
REM  KP2002_0m_d.res in P-42(1)c 
REM R1 =  0.0156 for    1183 Fo > 4sig(Fo)  and  0.0196 for all    1304 data 
REM     35 parameters refined using      0 restraints 
  
END 
  
WGHT      0.0080      5.4800 
  
REM Instructions for potential hydrogen bonds 
HTAB O1 O2_$21 
  
REM Highest difference peak  1.197,  deepest hole -1.819,  1-sigma level  0.263 
Q1    1   0.2059  0.7890  0.4992  11.00000  0.05    1.20 
Q2    1   0.0846  0.7795  0.4909  11.00000  0.05    0.96 
Q3    1   0.1399  0.7136  0.5473  11.00000  0.05    0.92 
Q4    1   0.5000  0.5000  0.0000  10.25000  0.05    0.89 
Q5    1   0.1227  0.5975  0.5696  11.00000  0.05    0.86 
; 
_shelx_res_checksum   61145 
  
_shelx_hkl_file 
; 
   0  -1   0    1.80    3.00 
   0  -1   0    1.30    3.20 
   0  -1   0    0.70    2.30 
   0  -1   0   -1.50    2.50 
   0  -1   0   -1.60    2.50 
   0  -1   0   -2.00    1.80 
   0  -1   0    2.30    2.40 
   0  -1   0    3.20    3.10 
   0  -1   0    5.00    3.30 
   0  -1   0   -0.50    1.40 
   0  -1   0   -0.80    3.00 
   0  -1   0    2.20    3.10 
   0  -1   0   -1.20    2.60 
   0  -1   0    3.20    3.00 
   0  -1   0    8.90    3.90 
   0  -1   0   -1.90    1.40 
   0  -1   0    0.90    1.80 
   0  -1   0   -3.00    1.70 
   0  -1   0   -1.30    1.60 
   0  -1   0    0.10    2.20 
   0  -1   0    1.40    3.90 
   0  -1   0   -1.40    1.40 
   0   1   0    5.80    2.80 
   0   1   0   -2.60    1.90 
   0   1   0   -0.30    2.40 
   0   1   0    1.80    2.50 
   0   1   0   -1.00    1.40 
   0   1   0    2.30    3.10 
   0   1   0    2.10    3.90 
   0   1   0    1.70    3.60 
   0   1   0    3.00    3.10 
   0   1   0    3.60    2.40 
   0   1   0    6.00    3.20 
   0   1   0    3.70    2.50 
   0   1   0   -3.50    2.30 
   0   1   0    1.20    2.20 
   0   1   0   -1.70    2.20 
   1   0   0    3.90    2.90 
   1   0   0   -0.70    3.30 
   1   0   0   -1.30    0.90 
   1   0   0    1.20    2.30 
   1   0   0   -1.60    1.40 
   1   0   0    0.40    3.00 
   1   0   0    0.80    2.40 
   1   0   0    0.90    2.60 
   1   0   0   -1.30    1.90 
   1   0   0    4.10    3.20 
   1   0   0   -1.20    2.40 
   1   0   0    1.60    2.60 
   1   0   0    1.80    3.20 
   1   0   0   -0.20    1.90 
   1   0   0    1.30    3.70 
   1   0   0   -1.70    1.60 
   1   0   0    0.40    1.90 
   1   0   0   -2.70    2.40 
   1   0   0    0.30    2.10 
   1   0   0    5.20    3.20 
   1   0   0    2.80    3.10 
  -1   0   0    3.70    3.80 
  -1   0   0    5.60    4.50 
  -1   0   0    1.30    2.40 
  -1   0   0   17.90    6.00 
  -1   0   0   -2.00    4.50 
  -1   0   0    5.00    4.60 
  -1   0   0    5.90    4.20 
  -1   0   0   18.20    5.70 
  -1   0   0    0.50    2.30 
  -1   0   0    9.80    5.70 
  -1   0   0    3.10    2.50 
  -1   0   0   -0.10    1.80 
   0  -1   0   -0.20    1.60 
  -1   0   0   -1.50    3.00 
  -1   0   0    5.40    2.60 
  -1   0   0    0.00    1.50 
  -1   0   0    3.90    2.00 
  -1   0   0    1.50    2.20 
  -1   0   0    6.70    4.70 
  -1   0   0    0.90    1.90 
  -1   0   0    1.90    2.40 
  -1  -1   0  941.31   61.49 
  -1  -1   0  868.71   62.99 
  -1  -1   0  923.31   62.79 
  -1  -1   0  976.60   63.39 
  -1  -1   0  864.81   66.69 
  -1  -1   0 1018.30   62.39 
  -1  -1   0  883.71   62.49 
  -1  -1   0  954.90   61.89 
  -1  -1   0  875.51   64.59 
  -1   1   0  962.50   60.99 
  -1   1   0  909.51   58.39 
  -1   1   0  916.91   60.19 
  -1   1   0  943.71   60.49 
  -1   1   0  847.72   65.69 
  -1   1   0  818.32   64.79 
  -1   1   0  943.91   60.29 
  -1   1   0 1011.50   63.89 
  -1  -1   0  833.52   64.39 
  -1  -1   0  891.81   59.89 
  -1  -1   0  927.41   61.39 
  -1  -1   0  980.20   66.79 
  -1  -1   0  949.21   63.19 
  -1  -1   0  928.91   67.09 
  -1  -1   0  876.11   62.99 
  -1  -1   0  805.72   63.29 
   1  -1   0  918.41   60.19 
   1  -1   0  873.11   60.49 
   1  -1   0  895.81   64.99 
   1  -1   0  956.30   59.59 
   1  -1   0  813.12   62.49 
   1  -1   0  863.61   65.49 
   1  -1   0  856.71   65.19 
   1  -1   0 1024.40   61.09 
  -1  -1   0  899.91   61.69 
  -1  -1   0  838.62   60.79 
  -1  -1   0  871.01   64.19 
  -1  -1   0  951.80   59.79 
  -1  -1   0  894.81   60.49 
   1  -1   0  944.61   61.09 
   1  -1   0  966.00   60.99 
   1  -1   0  939.41   61.29 
   1  -1   0  924.81   58.29 
   1  -1   0  921.41   59.69 
   1   1   0  911.51   61.79 
   1   1   0  999.60   63.39 
   1   1   0  935.51   62.69 
   1   1   0  869.71   60.59 
   1   1   0  904.21   65.99 
   1   1   0  917.31   61.79 
   1   1   0  920.41   62.99 
   1   1   0  823.92   65.99 
   1   1   0  930.71   61.29 
   1   1   0  963.60   59.69 
   1   1   0  930.71   58.39 
   1   1   0 1031.10   60.99 
   1   1   0  888.81   58.29 
   1   1   0  867.21   64.59 
   1   1   0  923.51   67.29 
   1   1   0 1006.40   62.29 
   1   1   0  899.91   61.39 
   1   1   0  929.71   62.49 
   1   1   0  972.90   62.39 
   1   1   0 1006.00   65.29 
   1   1   0  991.20   62.89 
   1  -1   0  952.90   61.39 
   1  -1   0  962.00   60.49 
   1  -1   0  896.11   59.29 
   1  -1   0  926.81   60.79 
   1  -1   0  972.00   61.19 
   1  -1   0 1016.20   58.89 
  -1   1   0  982.00   60.79 
  -1   1   0 1046.70   58.49 
  -1   1   0  937.41   65.89 
  -1   1   0  936.81   61.49 
  -1   1   0  990.30   60.69 
  -1   1   0  979.70   61.09 
   1  -1   0  906.41   63.79 
   2   1   0 2835.72  188.08 
   2   1   0 3199.38  197.18 
   2   1   0 2963.70  198.48 
   2   1   0 3019.50  187.58 
   2   1   0 2868.61  188.78 
   2   1   0 2955.90  189.58 
   2   1   0 2834.22  191.48 
   2   1   0 3056.49  189.58 
   2   1   0 2977.10  189.38 
   2   1   0 2985.70  197.88 
  -2  -1   0 2896.71  188.58 
  -2  -1   0 2954.60  192.68 
  -2  -1   0 2801.82  192.58 
  -2  -1   0 3079.59  186.88 
  -2  -1   0 2777.92  193.98 
  -2  -1   0 2784.02  193.58 
  -2  -1   0 3082.59  189.98 
  -2  -1   0 2714.33  196.18 
  -2  -1   0 3134.29  188.18 
  -2  -1   0 3121.59  188.98 
  -2  -1   0 2919.21  187.58 
  -2  -1   0 3044.50  193.28 
  -1   2   0 3137.19  180.78 
  -1   2   0 3122.69  188.68 
  -1   2   0 3208.98  181.38 
  -1   2   0 3158.88  186.28 
  -1   2   0 3065.79  187.68 
  -1   2   0 3246.38  183.78 
  -1   2   0 2746.43  192.98 
  -1   2   0 2926.81  181.88 
   2   1   0 3075.19  185.38 
   2   1   0 3052.19  187.98 
   2   1   0 3230.88  186.78 
   2   1   0 3069.99  188.18 
   2   1   0 3147.98  188.58 
  -2  -1   0 3062.09  197.88 
   2   1   0 3122.49  189.98 
  -1   2   0 3043.40  185.68 
  -1   2   0 3225.28  186.68 
  -2  -1   0 2892.61  187.78 
  -2  -1   0 3060.79  192.98 
  -2  -1   0 2942.11  186.48 
  -2  -1   0 2992.70  183.98 
  -2  -1   0 3036.80  184.18 
  -2  -1   0 3014.70  187.68 
   2   1   0 3175.08  185.08 
   2   1   0 2956.50  194.98 
   2   1   0 2809.72  194.08 
   2   1   0 2802.12  186.28 
   2   1   0 2823.22  188.78 
   2   1   0 2947.91  186.68 
   1  -2   0 3016.30  185.98 
   1  -2   0 2764.12  187.38 
   1  -2   0 2936.61  193.58 
   1  -2   0 3086.89  185.68 
   1  -2   0 2805.72  190.68 
   1  -2   0 2916.01  186.48 
   1  -2   0 2918.01  195.08 
   1  -2   0 2854.01  181.08 
   1  -2   0 3040.70  182.48 
   1  -2   0 3101.29  186.88 
   1  -2   0 2951.30  185.68 
   1  -2   0 3059.39  188.48 
   1  -2   0 3061.49  181.08 
   1  -2   0 3153.68  187.58 
   1  -2   0 3178.08  187.68 
   1  -2   0 3136.99  185.48 
   1  -2   0 3000.10  189.28 
   1  -2   0 2991.10  185.88 
   1  -2   0 2972.90  182.28 
   1  -2   0 3005.90  186.38 
   1  -2   0 3032.00  181.48 
   1  -2   0 3017.10  185.68 
   1  -2   0 3115.49  187.38 
   1  -2   0 2919.91  190.08 
   1  -2   0 3013.10  184.28 
   2   1   0 2789.82  187.68 
   1  -2   0 2939.41  181.48 
   1  -2   0 3034.70  189.38 
  -2  -1   0 3060.39  188.18 
  -2  -1   0 2887.81  186.68 
  -2  -1   0 2767.32  194.58 
  -2  -1   0 2967.10  187.38 
  -2  -1   0 3007.40  189.78 
  -1   2   0 3227.28  184.38 
  -1   2   0 3086.49  182.68 
  -1   2   0 3053.99  186.38 
  -1   2   0 3043.90  183.28 
  -1   2   0 3250.67  187.58 
  -1   2   0 2913.41  193.78 
  -1   2   0 2959.60  188.68 
  -1   2   0 2950.10  182.18 
  -1   2   0 3032.50  181.78 
   2   0   0   -0.60    5.00 
   2   0   0    2.00    5.00 
   0   2   0   10.40    5.40 
   0   2   0    8.40    6.00 
   0   2   0    5.60    8.00 
  -2   0   0   -0.30    3.70 
   2   0   0   26.20   10.40 
   2   0   0   10.70    6.50 
   2   0   0   57.19   14.50 
   2   0   0   -1.30    4.70 
   2   0   0   -3.70    4.50 
   2   0   0    2.10    5.70 
   2   0   0    7.20    8.60 
   2   0   0    1.10    5.20 
   2   0   0    8.40    6.60 
  -2   0   0    4.00    5.00 
  -2   0   0    7.50    8.60 
  -2   0   0    0.90    4.60 
  -2   0   0    2.90    5.30 
   0  -2   0    4.80    5.80 
   0  -2   0    4.50    5.70 
   0  -2   0    9.40    7.60 
   0  -2   0   -5.00    6.40 
   0  -2   0    9.30    7.90 
   0  -2   0    7.20    3.00 
   0  -2   0   20.70    8.80 
   0  -2   0    6.90    6.80 
   0  -2   0    8.80    6.00 
   0  -2   0    4.60    5.50 
   0  -2   0   10.20    6.40 
   0  -2   0   -5.00    4.70 
   0  -2   0    6.00    5.00 
   0  -2   0    5.90    6.90 
   0  -2   0    6.60    6.10 
   0  -2   0   -0.50    5.40 
   0  -2   0    6.80    6.00 
   0  -2   0   -2.60    6.10 
   0  -2   0   10.10    5.10 
   0  -2   0   14.00    7.00 
   0  -2   0    5.10    5.30 
   0  -2   0    5.30    6.10 
   0  -2   0   14.20    8.10 
   0  -2   0   -1.90    4.70 
   0  -2   0    1.40    6.90 
   0  -2   0    1.80    7.80 
   0  -2   0   19.20    5.50 
  -2   0   0    2.50    7.00 
   0   2   0    6.90    2.10 
   0   2   0   13.90    5.60 
   0   2   0    1.20    4.70 
   0   2   0    6.50    6.20 
   2   0   0   -0.70    3.90 
   2   0   0    7.20    8.10 
  -2   0   0    2.30    4.00 
  -2   0   0   -2.60    6.50 
  -2   0   0   -1.20    7.20 
  -2   0   0   21.00   10.10 
  -2   0   0   20.20   11.00 
  -2   0   0    2.20    6.90 
   0   2   0    2.90    6.10 
  -2   0   0    7.70    7.80 
  -2   0   0    8.50    5.70 
  -2   0   0   -9.50    6.00 
   2   0   0    4.40    5.40 
   0   2   0    6.40    5.00 
   0   2   0   21.30    8.40 
  -2   0   0    3.70    6.70 
  -2   0   0    0.30    5.70 
  -2   0   0    5.10    4.80 
  -2   0   0   -0.10    3.30 
  -2   0   0   -6.00    3.00 
  -2   0   0    1.40    7.90 
   0   2   0   -0.80    3.80 
   2   0   0    0.10    8.60 
   2   0   0   11.60    8.90 
   2   0   0    7.60    5.50 
   2   0   0   12.60    8.80 
   0   2   0    6.40    5.70 
   0   2   0    1.30    5.80 
   0   2   0    2.30    6.70 
   0   2   0   11.90    6.40 
   2   0   0    5.70    5.60 
   2   0   0    2.30    5.70 
   0   2   0    7.40    5.30 
   2   0   0   20.50    6.50 
   0   2   0    3.50    5.20 
   2  -1   0 3007.70  182.38 
  -1  -2   0 2969.30  182.88 
   2  -1   0 3080.99  185.88 
   2  -1   0 3150.78  188.98 
   2  -1   0 3071.29  185.58 
   2  -1   0 3166.78  187.58 
   2  -1   0 2979.10  187.38 
   2  -1   0 3170.28  187.68 
   2  -1   0 2938.71  186.68 
   2  -1   0 2979.70  189.78 
   2  -1   0 3094.99  185.08 
   2  -1   0 3125.29  187.28 
   1   2   0 2907.01  187.38 
   2  -1   0 3086.99  188.08 
   2  -1   0 3013.90  181.68 
   2  -1   0 3069.99  187.18 
   2  -1   0 3149.78  181.88 
  -1  -2   0 3013.80  192.18 
  -1  -2   0 3105.59  190.98 
  -1  -2   0 2870.21  187.68 
  -1  -2   0 2913.31  182.58 
  -1  -2   0 2931.91  191.38 
  -1  -2   0 3018.20  190.58 
   1   2   0 3045.60  181.88 
   1   2   0 3126.09  184.28 
   1   2   0 2949.41  182.48 
   1   2   0 2921.11  190.58 
   1   2   0 3075.89  190.68 
   1   2   0 2984.10  182.68 
   1   2   0 3049.59  193.98 
   1   2   0 3065.89  188.18 
   2  -1   0 3002.90  182.38 
   1   2   0 2888.71  188.08 
  -2   1   0 3145.79  181.98 
  -2   1   0 3144.19  188.48 
  -2   1   0 2971.20  185.48 
  -2   1   0 2955.20  186.88 
  -2   1   0 3082.19  186.08 
  -2   1   0 3091.09  181.28 
  -2   1   0 3042.60  194.68 
  -2   1   0 2977.20  193.68 
  -2   1   0 3134.29  195.28 
  -2   1   0 3014.10  183.78 
  -2   1   0 3113.19  187.38 
  -2   1   0 3087.99  187.18 
  -2   1   0 3127.49  182.28 
  -1  -2   0 2951.80  193.28 
  -1  -2   0 3029.90  182.58 
  -1  -2   0 2905.21  190.48 
  -1  -2   0 2922.61  189.88 
  -1  -2   0 2882.01  188.88 
  -1  -2   0 2942.21  191.38 
  -1  -2   0 2909.21  189.18 
  -1  -2   0 2858.71  189.38 
  -1  -2   0 2796.12  190.38 
  -1  -2   0 2939.11  183.48 
  -1  -2   0 2894.01  187.98 
  -1  -2   0 2900.61  187.68 
  -1  -2   0 3053.79  188.38 
   2  -1   0 2966.40  186.88 
   2  -1   0 2843.22  186.18 
   2  -1   0 2661.43  193.48 
   2  -1   0 2952.10  185.98 
   2  -1   0 3252.47  187.28 
   2  -1   0 2902.51  196.38 
   2  -1   0 2839.62  181.18 
   2  -1   0 3076.49  195.88 
   1   2   0 3054.09  189.58 
   1   2   0 3017.90  193.68 
   1   2   0 3128.49  189.98 
  -2   1   0 3098.09  187.78 
  -2   1   0 3050.79  188.68 
  -1  -2   0 3168.88  189.08 
  -1  -2   0 2974.80  190.08 
  -1  -2   0 2685.83  186.88 
  -1  -2   0 3001.60  193.58 
   1   2   0 3153.68  190.28 
   1   2   0 3008.30  188.68 
   1   2   0 2978.50  192.38 
  -2   1   0 3155.38  184.98 
  -2   1   0 3044.60  181.48 
   1   2   0 3033.70  188.58 
   1   2   0 3037.70  183.68 
  -1  -2   0 2913.21  188.78 
  -2   1   0 3232.68  185.78 
   2  -2   0 2066.69  128.89 
   2   2   0 1979.70  137.39 
   2  -2   0 2116.79  125.29 
   2   2   0 1957.80  134.99 
   2   2   0 2048.99  144.39 
   2   2   0 2113.49  136.59 
   2  -2   0 2139.99  133.69 
   2  -2   0 2093.49  132.29 
   2  -2   0 2093.59  124.59 
   2  -2   0 2139.79  124.99 
   2  -2   0 2002.70  139.99 
   2  -2   0 2060.39  133.19 
   2  -2   0 1977.80  133.49 
   2  -2   0 2020.40  142.99 
   2  -2   0 2093.29  131.69 
   2  -2   0 2029.10  139.79 
   2  -2   0 2166.68  146.09 
  -2   2   0 2027.20  134.19 
  -2   2   0 2030.70  129.19 
  -2   2   0 2093.29  133.59 
  -2   2   0 2034.40  133.69 
  -2  -2   0 1955.00  135.99 
   2   2   0 2111.69  137.19 
   2   2   0 2184.58  134.59 
  -2  -2   0 2034.00  131.89 
   2   2   0 1996.00  136.89 
  -2   2   0 2222.08  133.99 
  -2   2   0 2112.19  134.29 
  -2   2   0 2122.19  134.09 
  -2   2   0 2154.78  128.59 
   2   2   0 1987.00  132.69 
   2   2   0 2013.90  128.49 
  -2  -2   0 2100.09  133.49 
  -2  -2   0 1999.40  132.69 
  -2  -2   0 2082.59  135.89 
  -2  -2   0 2069.19  135.09 
  -2  -2   0 1769.02  141.99 
  -2  -2   0 2131.79  138.89 
  -2  -2   0 2040.80  145.79 
  -2  -2   0 1886.51  137.79 
  -2  -2   0 1897.21  139.49 
  -2  -2   0 1940.91  136.79 
  -2  -2   0 2075.09  135.19 
  -2  -2   0 2066.99  141.29 
   2  -2   0 2194.08  133.79 
  -2   2   0 1920.81  142.59 
  -2   2   0 2195.68  133.59 
  -2   2   0 1959.40  138.69 
  -2   2   0 1870.11  142.59 
  -2   2   0 1814.52  134.39 
   2  -2   0 2116.99  134.29 
  -2  -2   0 2069.69  139.09 
  -2  -2   0 2158.28  143.59 
  -2  -2   0 2380.46  140.79 
  -2  -2   0 2091.99  130.49 
  -2  -2   0 1979.50  146.09 
   2   2   0 1989.90  140.69 
   2   2   0 2067.09  138.09 
   2   2   0 1844.22  143.29 
   2   2   0 2093.19  135.39 
   2   2   0 1855.51  134.19 
   2   2   0 2050.59  137.39 
   2   2   0 2059.99  141.39 
   2  -2   0 2005.50  129.49 
   2  -2   0 2097.69  123.99 
   2  -2   0 2149.19  129.89 
   2  -2   0 2134.49  135.79 
   2   2   0 2227.78  147.89 
  -2  -2   0 2102.49  135.99 
   2   2   0 2207.48  136.69 
   2  -2   0 2131.39  135.99 
   2  -2   0 2210.28  137.79 
   2  -2   0 2061.29  125.99 
   2   2   0 1948.31  136.89 
   2   2   0 2132.59  131.69 
   2   2   0 2127.39  128.09 
   2  -2   0 2057.09  124.29 
  -2  -2   0 1974.10  134.89 
  -2  -2   0 2029.10  142.09 
   2  -2   0 2223.88  132.29 
   2  -2   0 2063.29  134.09 
  -2  -2   0 2230.38  136.89 
  -2  -2   0 1905.31  137.09 
   2   2   0 2165.08  135.09 
   2  -2   0 2160.58  124.09 
   3   2   0   21.30   14.40 
   3   2   0   18.10   13.20 
   2  -3   0   14.30    4.70 
   3   2   0   13.30   17.00 
   3   2   0    6.00   10.80 
   3   2   0   32.40   19.90 
   3   2   0   35.00   13.10 
   2  -3   0   14.40    5.30 
   2  -3   0    0.10    6.20 
  -3  -2   0   18.70   10.90 
  -3  -2   0   44.40   11.20 
  -3  -2   0    9.90    9.60 
  -3  -2   0   23.00   10.90 
  -3  -2   0   13.90   11.40 
  -3  -2   0    6.70    9.30 
  -3  -2   0   17.00    9.30 
  -3  -2   0    2.80    9.60 
  -3  -2   0   26.30   20.50 
   2  -3   0   25.70   12.50 
   3   2   0   20.70   12.00 
   2  -3   0   26.40   11.10 
   2  -3   0   26.60   12.60 
   3   2   0   43.90   15.00 
   3   2   0   21.80    9.90 
  -2   3   0    5.70    8.00 
  -3  -2   0   30.70   18.30 
  -3  -2   0   22.50   15.70 
  -3  -2   0   19.20   11.20 
  -3  -2   0   18.00   16.60 
  -3  -2   0   37.60   21.80 
  -3  -2   0    5.10   15.70 
   2  -3   0   34.70    9.40 
   2  -3   0    9.90    7.40 
   3   2   0   10.90   11.80 
  -2   3   0   18.70    6.60 
   2  -3   0   76.09   11.50 
   2  -3   0   13.00    8.60 
  -3  -2   0    4.50    9.90 
  -3  -2   0   18.70   13.30 
   3   2   0   16.30   11.60 
   3   2   0   -8.20   13.10 
   3   2   0   20.70   10.60 
   3   2   0    4.70    9.30 
  -3  -2   0   24.90   14.50 
   2  -3   0   11.70    9.00 
   2  -3   0   17.80    9.40 
   2  -3   0   13.70   10.10 
   2  -3   0   18.20    5.90 
   2  -3   0    3.20    8.50 
   2  -3   0   15.20    4.90 
  -3  -2   0   28.10   12.60 
  -3  -2   0   93.49   21.20 
  -3  -2   0   27.70   13.20 
  -3  -2   0   15.50   13.70 
   2  -3   0   23.90    9.20 
  -2   3   0   12.60   10.10 
  -2   3   0   22.30    7.40 
   3   2   0   10.50   13.30 
   2  -3   0    5.80    9.40 
   2  -3   0   24.80   11.70 
  -2   3   0   -2.30   12.40 
   3   2   0   11.00    9.00 
   2  -3   0   19.60    3.90 
   2  -3   0   15.60   17.10 
   2  -3   0   25.60   15.70 
   3   2   0   23.40   11.90 
   2  -3   0    3.00   12.40 
  -2   3   0   21.40    3.90 
   3   2   0   22.90   11.50 
   2  -3   0   21.50    5.60 
   2  -3   0    1.60    8.70 
   2  -3   0   18.40   10.20 
   2  -3   0   14.90   11.80 
  -2   3   0   23.80    7.90 
   3   2   0   35.00   13.70 
  -2   3   0    6.20   10.90 
  -2   3   0   12.40   10.40 
  -2   3   0   24.40   10.40 
  -2   3   0   21.10   15.40 
  -2   3   0   14.90    4.20 
  -2   3   0   19.00    9.30 
  -2   3   0   22.70   13.70 
   2  -3   0    4.10    7.50 
  -2   3   0   19.40    8.40 
   3   2   0    8.40   10.80 
   2  -3   0  172.28   29.30 
  -2   3   0   20.00   10.80 
   3   2   0   18.80   13.70 
  -1   3   0 5335.97  318.47 
  -1   3   0 5137.29  314.77 
  -1   3   0 5076.49  314.47 
  -1   3   0 4866.51  311.87 
  -1   3   0 5141.79  314.87 
   3   1   0 5415.76  321.77 
   3   1   0 5350.46  319.67 
  -1   3   0 5111.89  327.27 
  -1   3   0 5320.47  321.97 
   1  -3   0 5048.79  310.87 
  -1   3   0 5069.49  311.67 
  -1   3   0 4973.20  326.47 
   3   1   0 5020.70  319.27 
  -1   3   0 5402.86  317.77 
   1  -3   0 5093.39  317.07 
  -3  -1   0 5207.18  323.77 
  -3  -1   0 5361.56  324.57 
  -1   3   0 5346.47  320.07 
  -3  -1   0 5060.19  318.97 
  -3  -1   0 5080.69  312.17 
  -3  -1   0 4879.91  316.87 
  -3  -1   0 5215.78  319.17 
  -3  -1   0 5174.78  316.97 
  -3  -1   0 5062.99  328.37 
  -3  -1   0 5127.39  318.27 
  -3  -1   0 5189.58  320.47 
  -3  -1   0 5087.89  330.27 
   3   1   0 5214.78  313.27 
   3   1   0 5446.75  318.87 
   3   1   0 5213.18  317.07 
  -3  -1   0 4819.92  316.37 
  -3  -1   0 4713.13  328.27 
   1  -3   0 5174.18  318.57 
  -1   3   0 5355.36  316.27 
   1  -3   0 5258.17  316.87 
  -1   3   0 5137.39  312.97 
   1  -3   0 5266.97  316.37 
   1  -3   0 5049.69  323.47 
   1  -3   0 4864.91  317.47 
  -3  -1   0 4965.60  317.77 
  -3  -1   0 5135.59  314.07 
   1  -3   0 5119.29  312.77 
   1  -3   0 5314.47  317.97 
   1  -3   0 5238.68  315.47 
   1  -3   0 5154.88  320.47 
   1  -3   0 5190.18  307.47 
   3   1   0 4909.81  317.17 
   3   1   0 5274.57  315.37 
   1  -3   0 5325.37  316.67 
   1  -3   0 5211.58  320.47 
   1  -3   0 5033.50  315.47 
   1  -3   0 5252.47  313.17 
   1  -3   0 5393.86  316.77 
   1  -3   0 5056.59  311.37 
   1  -3   0 4836.52  316.17 
   1  -3   0 5158.58  310.87 
   1  -3   0 4809.12  321.97 
   1  -3   0 5331.67  324.27 
   1  -3   0 5381.46  313.27 
   3   1   0 5350.16  321.67 
   3   1   0 4980.90  327.47 
   3   1   0 5051.19  316.17 
   3   1   0 5320.27  323.87 
   3   1   0 4993.60  315.97 
   3   1   0 5389.86  329.87 
   3   1   0 5116.39  321.87 
   3   1   0 5114.79  320.07 
  -1   3   0 5314.37  313.27 
  -1   3   0 5248.88  313.57 
   1  -3   0 4950.60  311.47 
   1  -3   0 5224.98  319.97 
   1  -3   0 5272.07  316.57 
   1  -3   0 4796.22  319.57 
  -3  -1   0 5002.00  320.57 
  -1   3   0 5235.48  306.67 
  -1   3   0 5463.65  321.97 
  -1   3   0 5335.17  315.77 
  -3  -1   0 4717.83  325.47 
  -1   3   0 5441.76  312.77 
   3   1   0 5300.27  320.97 
   3   1   0 5084.89  331.57 
   1  -3   0 5235.88  317.57 
   3   1   0 5240.68  319.87 
   3   1   0 5240.18  325.37 
  -3  -1   0 5116.39  318.87 
   3   1   0 5204.68  333.37 
  -3  -1   0 4990.90  326.57 
  -3  -1   0 5195.28  319.97 
  -3  -1   0 5200.38  332.07 
  -3  -1   0 5206.98  317.67 
  -3  -1   0 5017.90  324.87 
  -3  -1   0 5059.29  324.77 
  -3  -1   0 5348.06  314.67 
  -3  -1   0 4751.12  317.47 
   1  -3   0 4966.10  326.37 
   3   0   0   -0.80    8.80 
  -3   0   0   19.30    9.50 
  -3   0   0   -1.00    5.60 
  -3   0   0   21.70   12.30 
   0   3   0    7.70    7.80 
   3   0   0    7.20    7.80 
  -3   0   0    2.00    9.20 
   0  -3   0    0.10    8.20 
   0  -3   0    2.50    7.00 
   0  -3   0   15.10   11.20 
  -3   0   0   -4.80    6.10 
   0  -3   0    6.00    3.40 
   0  -3   0   11.20    9.80 
   0  -3   0    6.40    9.00 
   0  -3   0    2.00    5.20 
   0   3   0   22.90   11.90 
   3   0   0   58.49   14.10 
   0  -3   0    4.20    7.50 
   0  -3   0    4.20    6.10 
   0  -3   0    0.40    6.10 
   0  -3   0   -5.00    6.40 
   0  -3   0   -8.50    5.00 
  -3   0   0    2.10    4.90 
  -3   0   0    8.20   11.30 
  -3   0   0    6.30   12.10 
  -3   0   0   21.10   12.00 
  -3   0   0   17.70   11.40 
   3   0   0    2.70    6.50 
   0   3   0    2.00    5.30 
   0   3   0  -12.10    7.10 
   0   3   0   15.90   10.60 
   0   3   0   -2.50    5.20 
   0   3   0    5.30    4.70 
   0   3   0    4.70    7.00 
   0   3   0    0.30    6.70 
   0   3   0   -5.20    4.40 
   0   3   0   -1.70    6.10 
   0   3   0    9.10    6.50 
   3   0   0  -15.20   11.00 
   3   0   0   10.70   12.70 
   3   0   0   -0.60    9.30 
   3   0   0   14.30    7.80 
   3   0   0    7.60   11.40 
   3   0   0   13.70    6.70 
   3   0   0    7.20   11.30 
   3   0   0    3.70    6.90 
   3   0   0    9.00    8.50 
   0  -3   0   21.90    9.80 
   0  -3   0   15.40    7.00 
   0  -3   0    6.70    8.90 
   0  -3   0   16.40    9.00 
   0  -3   0    9.60    8.80 
   0  -3   0    8.40    7.60 
   0  -3   0    1.30    6.80 
   0  -3   0    0.70    6.20 
   0  -3   0    3.60    7.30 
   0  -3   0    0.50    8.60 
   3   0   0    3.60    7.80 
  -3   0   0    2.40    5.30 
  -3   0   0   -3.80    8.40 
   0   3   0   11.20    8.70 
  -3   0   0    4.50    6.30 
  -3   0   0   29.50   10.90 
   3   0   0   -0.60    6.90 
   3   0   0   -0.20    8.70 
   3   0   0    0.00    6.50 
   0   3   0    6.40    6.00 
   0   3   0    7.60    7.70 
   0   3   0    2.60    6.10 
   0  -3   0    3.40    9.40 
  -3   0   0    3.40    8.80 
   0  -3   0   48.70   12.60 
   0  -3   0    5.30    6.70 
   3   0   0    2.50    7.30 
  -3   0   0    5.80    6.40 
  -3   0   0   15.60   12.80 
   0   3   0    2.60    7.00 
   3   0   0    1.70    7.30 
   3   0   0   -2.30    6.60 
   3   0   0   14.00    8.00 
   3   0   0   10.40   10.40 
   3   0   0   15.20    9.00 
  -3   0   0    6.10    6.00 
  -3   0   0   17.60   11.70 
   0  -3   0   10.60    8.00 
  -3   0   0    4.80    8.90 
   0  -3   0    7.70    9.70 
  -3   0   0    8.90    7.20 
  -3   1   0 5105.99  324.87 
   3  -1   0 5058.79  312.27 
   3  -1   0 5063.79  309.37 
   3  -1   0 4763.82  326.17 
   3  -1   0 4638.14  328.07 
  -3   1   0 5093.59  316.27 
  -1  -3   0 5082.79  317.67 
   3  -1   0 5258.97  316.27 
   1   3   0 5288.57  310.07 
   1   3   0 5235.48  309.37 
   1   3   0 5141.09  319.37 
   1   3   0 5106.19  309.77 
   1   3   0 5503.35  324.57 
   1   3   0 5171.68  317.07 
  -1  -3   0 4829.02  319.87 
  -1  -3   0 5172.28  308.97 
  -1  -3   0 5016.10  317.57 
   3  -1   0 5416.36  310.67 
  -3   1   0 5277.17  309.07 
   1   3   0 5405.26  319.47 
   3  -1   0 5070.19  316.77 
   3  -1   0 5261.57  312.87 
  -3   1   0 5313.97  309.87 
  -3   1   0 5251.27  318.17 
  -3   1   0 5169.28  314.77 
  -3   1   0 5005.20  315.57 
  -3   1   0 4737.13  318.87 
   3  -1   0 5055.09  328.27 
   1   3   0 5281.57  315.37 
  -1  -3   0 5255.67  318.17 
  -1  -3   0 5354.56  319.37 
  -1  -3   0 4891.21  318.27 
  -1  -3   0 4950.80  323.77 
   1   3   0 5169.78  309.17 
   1   3   0 5172.98  318.97 
   1   3   0 5133.19  316.17 
   1   3   0 5054.69  315.27 
   1   3   0 5062.99  321.57 
   3  -1   0 5297.37  318.37 
   1   3   0 5410.76  322.77 
   1   3   0 5463.55  320.57 
   3  -1   0 5332.97  316.47 
   3  -1   0 5269.87  315.97 
  -3   1   0 5370.26  313.87 
   3  -1   0 5136.99  318.47 
  -3   1   0 4999.30  323.37 
  -1  -3   0 4974.10  322.17 
  -1  -3   0 4933.61  309.77 
  -1  -3   0 4688.23  319.27 
  -1  -3   0 5093.89  317.97 
  -1  -3   0 5046.60  319.17 
  -1  -3   0 5226.38  318.87 
  -3   1   0 5140.79  309.07 
   1   3   0 5136.19  308.87 
   3  -1   0 5422.86  314.57 
   3  -1   0 5121.89  315.97 
  -1  -3   0 5126.49  320.07 
  -1  -3   0 4897.51  310.17 
  -1  -3   0 4992.00  318.87 
  -1  -3   0 4895.61  319.87 
   1   3   0 5028.50  316.07 
  -3   1   0 5004.00  323.37 
  -3   1   0 4738.53  315.67 
   3  -1   0 5031.50  320.27 
   3  -1   0 5436.46  316.87 
  -1  -3   0 4929.61  316.17 
  -1  -3   0 5193.68  316.67 
  -1  -3   0 5182.88  321.27 
  -1  -3   0 5127.89  320.07 
   3  -1   0 5076.69  309.97 
   3  -1   0 4839.82  325.77 
   3  -1   0 5156.18  316.37 
   1   3   0 5122.99  319.27 
   1   3   0 5024.60  322.47 
  -1  -3   0 4917.41  316.47 
   3  -1   0 5206.18  315.47 
   1   3   0 5198.08  316.87 
   1   3   0 5184.68  309.67 
  -1  -3   0 4927.31  310.47 
  -3   1   0 4928.31  323.67 
  -1  -3   0 4855.61  318.97 
  -1  -3   0 5064.89  316.07 
  -3   1   0 5161.58  317.77 
  -3   1   0 5433.26  310.67 
   3  -1   0 5263.07  311.87 
   3  -1   0 5214.08  315.67 
  -1  -3   0 5257.27  317.57 
   3  -1   0 4974.70  314.77 
  -3   1   0 5283.37  314.37 
   3  -1   0 5321.57  311.67 
   3  -1   0 5125.19  314.47 
   2   3   0    2.70    9.20 
   2   3   0   29.00   17.30 
   2   3   0   42.70   16.20 
  -2  -3   0    3.30    9.60 
  -3   2   0   20.60    4.60 
  -2  -3   0   13.90    6.80 
   2   3   0   69.69   11.40 
  -3   2   0   12.40    9.90 
  -2  -3   0   13.70   12.20 
  -3   2   0    1.80    8.00 
  -3   2   0   32.30   19.10 
  -3   2   0   18.30   15.90 
   2   3   0   22.70    9.70 
   2   3   0   35.50   16.90 
   2   3   0   56.99   15.40 
  -2  -3   0   15.70   11.70 
  -2  -3   0    7.50    9.50 
  -2  -3   0   23.10   12.20 
   3  -2   0   37.50   18.80 
  -3   2   0   36.40   19.30 
  -3   2   0   34.40   10.90 
  -3   2   0   -4.40    6.60 
  -2  -3   0   18.80   13.00 
  -2  -3   0    0.50   11.40 
  -2  -3   0   10.40   11.20 
  -2  -3   0   25.90   16.10 
  -2  -3   0   -0.60    9.00 
  -2  -3   0    6.20    6.30 
  -2  -3   0   24.10   14.50 
   3  -2   0   25.20   12.60 
   3  -2   0   66.29   17.90 
  -3   2   0  131.09   28.00 
   3  -2   0   58.99   15.40 
   3  -2   0   11.50    5.30 
   2   3   0   12.90   10.10 
   2   3   0    7.00    9.40 
   2   3   0   20.20   12.90 
   3  -2   0   27.20   17.70 
  -3   2   0   24.50    8.80 
  -2  -3   0   25.60   13.40 
  -3   2   0   14.20    4.40 
   2   3   0   14.20   12.20 
   2   3   0   13.10   16.00 
   2   3   0    0.40    8.60 
  -2  -3   0   26.30   13.80 
   3  -2   0   10.70    9.20 
   3  -2   0    5.00   13.90 
   3  -2   0   17.70    5.90 
  -3   2   0   15.50   10.70 
  -3   2   0   27.40    9.80 
   3  -2   0   12.40    5.50 
   3  -2   0    4.70    8.20 
  -2  -3   0   -0.70   11.20 
   3  -2   0   21.80    9.60 
   3  -2   0   94.59   19.20 
   3  -2   0    5.90   10.00 
   3  -2   0   30.00   11.70 
   3  -2   0   14.80   10.20 
   3  -2   0    9.00    9.30 
  -2  -3   0   13.40   12.10 
  -2  -3   0   27.20   16.30 
  -2  -3   0   20.10    9.30 
  -2  -3   0   21.60   17.60 
  -2  -3   0   17.10   11.40 
   2   3   0   -2.80    8.90 
   2   3   0   13.60   12.00 
   2   3   0  120.79   24.70 
   3  -2   0    9.30    9.00 
   3  -2   0    1.70    8.60 
   3  -2   0    6.80   15.00 
  -2  -3   0   20.10   15.10 
   2   3   0   12.40    8.90 
   3  -2   0   23.30    8.70 
  -2  -3   0   19.50    7.80 
   3  -2   0   24.80   10.70 
  -2  -3   0    7.60   11.00 
   3  -2   0   15.40    4.90 
   2   3   0   28.60   12.60 
  -2  -3   0   29.40   12.40 
  -3   2   0   20.60   10.20 
  -3   2   0   12.30    9.80 
   3  -2   0   29.10   11.80 
   3  -2   0   11.10    4.90 
   3  -2   0   -5.30   12.90 
  -3   3   0  173.38   23.00 
   3  -3   0  134.39   35.20 
   3   3   0  142.79   26.00 
   3   3   0  237.98   24.30 
  -3  -3   0  245.38   36.00 
  -3  -3   0  188.48   24.10 
   3   3   0  174.18   26.00 
  -3   3   0  185.58   30.10 
  -3   3   0  174.68   24.00 
  -3   3   0  203.48   31.20 
  -3   3   0  193.18   30.60 
  -3   3   0  186.68   40.10 
   3  -3   0  167.18   35.50 
  -3   3   0  157.88   34.10 
   3  -3   0  208.48   24.50 
   3   3   0  251.17   45.10 
   3   3   0  181.28   30.30 
   3   3   0  127.59   29.00 
   3   3   0  237.58   44.70 
   3   3   0  203.68   30.90 
   3   3   0  201.78   33.80 
   3  -3   0  178.38   28.30 
   3  -3   0  258.27   33.20 
  -3  -3   0  264.17   43.80 
  -3   3   0  200.28   30.30 
  -3   3   0  215.58   30.10 
   3   3   0  184.78   36.30 
   3   3   0  196.08   34.00 
  -3   3   0  114.89   33.70 
   3  -3   0  255.27   32.60 
   3   3   0  172.68   29.60 
   3   3   0  231.48   36.90 
   3   3   0  231.18   35.60 
  -3  -3   0  234.18   36.20 
  -3  -3   0  178.08   35.00 
   3   3   0  170.18   32.30 
   3   3   0  211.68   42.50 
  -3  -3   0  199.08   31.80 
  -3   3   0  202.48   28.00 
  -3  -3   0  221.58   33.20 
  -3  -3   0  169.68   32.50 
  -3  -3   0  121.39   34.10 
  -3  -3   0  198.78   36.80 
   3  -3   0  240.48   31.10 
   3  -3   0  179.58   30.90 
   3  -3   0  212.98   30.40 
   3  -3   0  192.98   27.30 
   3  -3   0  110.99   24.70 
   3  -3   0  159.58   23.90 
   3  -3   0  222.08   35.10 
  -3  -3   0  211.98   33.00 
  -3   3   0  251.87   35.60 
  -3  -3   0  145.49   36.10 
  -3  -3   0  222.28   35.60 
  -3  -3   0  180.98   31.50 
  -3  -3   0  252.37   41.80 
  -3  -3   0  184.98   27.40 
  -3  -3   0  183.78   34.10 
   3  -3   0  227.78   28.10 
  -3  -3   0  175.68   28.80 
  -3  -3   0  172.68   22.70 
  -3  -3   0  158.28   37.90 
   3  -3   0  234.28   40.80 
   3  -3   0  218.28   29.20 
   3  -3   0  201.18   42.90 
   3  -3   0  194.98   31.30 
   3  -3   0  137.99   29.20 
  -3   3   0  224.48   25.60 
   3   3   0  228.28   36.40 
   3  -3   0  243.68   29.70 
  -3  -3   0  219.68   24.40 
  -3  -3   0  182.88   38.00 
  -3  -3   0  220.48   34.50 
  -3  -3   0  189.38   40.80 
  -3  -3   0  183.88   33.90 
   3   3   0  231.08   36.40 
   3   3   0  192.68   31.10 
  -3  -3   0  185.78   30.20 
   3  -3   0  191.18   14.90 
   3  -3   0  240.88   33.70 
  -3   4   0  220.88   30.30 
  -4  -3   0  108.79   29.90 
  -4  -3   0  229.38   39.00 
  -4  -3   0  173.58   31.50 
  -4  -3   0  229.98   45.00 
  -3   4   0  232.18   27.70 
   3  -4   0  158.58   41.00 
   4   3   0  193.78   37.00 
   4   3   0  218.28   34.50 
   4   3   0  309.97   45.40 
   4   3   0  183.38   43.40 
  -3   4   0  239.88   49.20 
   4   3   0  136.19   31.70 
   4   3   0  259.87   49.99 
   4   3   0  214.18   33.30 
   4   3   0  194.18   35.30 
  -4  -3   0  177.28   37.60 
   3  -4   0  280.97   39.20 
   4   3   0  228.98   29.00 
   4   3   0  168.58   35.90 
   4   3   0  136.29   34.60 
   4   3   0  176.18   35.50 
  -3   4   0  198.28   34.00 
  -4  -3   0  238.28   40.80 
  -4  -3   0  265.87   53.19 
  -4  -3   0  204.98   43.20 
   3  -4   0  223.48   33.90 
  -3   4   0  227.98   34.40 
   3  -4   0  203.88   30.90 
   3  -4   0  229.98   46.00 
   3  -4   0  247.58   34.80 
   3  -4   0  178.38   44.60 
   3  -4   0  260.27   37.50 
  -4  -3   0  228.38   36.00 
  -3   4   0  204.28   40.20 
  -4  -3   0  222.98   35.00 
  -4  -3   0  138.89   35.30 
  -4  -3   0  224.88   44.90 
  -4  -3   0  155.58   25.90 
  -4  -3   0  201.08   47.40 
  -4  -3   0  171.28   33.00 
   3  -4   0  256.77   37.80 
   3  -4   0  220.28   40.00 
   4   3   0  230.78   38.40 
  -3   4   0  219.98   32.50 
  -4  -3   0  218.78   41.00 
   4   3   0  235.88   36.50 
  -3   4   0  240.88   34.30 
   4   3   0  181.88   30.30 
   4   3   0  152.78   29.90 
  -3   4   0  232.68   40.70 
  -3   4   0  195.28   32.00 
   3  -4   0  284.87   31.60 
   3  -4   0  221.28   31.40 
  -4  -3   0  294.07   50.79 
   4   3   0  231.78   37.10 
   3  -4   0  195.68   30.30 
   4   3   0  270.37   42.90 
   4   3   0  172.28   43.70 
   4   3   0  214.18   34.70 
  -4  -3   0  239.68   27.60 
  -3   4   0  250.67   27.70 
  -3   4   0  240.78   36.60 
  -3   4   0  217.08   34.90 
   3  -4   0  276.57   28.40 
  -3   4   0  229.18   45.20 
  -4  -3   0  172.08   30.30 
  -4  -3   0  166.18   32.20 
   3  -4   0  180.28   34.90 
   4   3   0  237.58   35.90 
   3  -4   0  159.88   30.30 
  -4  -3   0  275.37   41.20 
  -4  -3   0  258.77   35.70 
   3  -4   0  241.98   32.90 
   3  -4   0  176.58   36.50 
   3  -4   0  234.28   32.60 
   3  -4   0  241.48   36.30 
  -3   4   0  247.88   26.20 
   2  -4   0 4898.11  296.47 
   2  -4   0 4617.14  293.27 
   2  -4   0 4597.74  292.07 
   2  -4   0 4652.83  297.07 
   2  -4   0 4486.75  300.47 
   2  -4   0 4555.94  288.47 
  -4  -2   0 4824.92  288.27 
   4   2   0 4609.74  298.47 
  -4  -2   0 4260.17  304.37 
   2  -4   0 4802.22  282.57 
   2  -4   0 4654.23  284.07 
  -2   4   0 4855.91  292.97 
   4   2   0 4465.85  297.57 
  -2   4   0 4595.24  280.57 
  -2   4   0 4608.14  292.47 
   2  -4   0 4444.46  294.37 
  -2   4   0 4808.42  286.57 
  -2   4   0 4604.04  293.57 
  -2   4   0 4738.33  300.17 
  -4  -2   0 4744.13  289.37 
  -2   4   0 4621.44  299.27 
  -2   4   0 4626.04  280.67 
  -2   4   0 4454.45  291.47 
  -2   4   0 4651.63  287.97 
  -4  -2   0 4408.06  295.87 
   4   2   0 4782.02  297.87 
   4   2   0 4412.46  303.27 
   4   2   0 4638.64  308.47 
  -4  -2   0 4754.12  295.77 
  -4  -2   0 4721.13  294.77 
  -4  -2   0 4616.24  293.77 
  -4  -2   0 4963.20  300.97 
  -4  -2   0 4556.04  312.77 
  -4  -2   0 4511.75  296.57 
  -4  -2   0 4476.55  304.37 
  -4  -2   0 4378.06  302.37 
   2  -4   0 4531.75  279.47 
  -4  -2   0 4877.51  309.27 
  -4  -2   0 4568.14  313.37 
  -4  -2   0 4804.32  296.07 
   2  -4   0 4597.94  290.37 
   4   2   0 4740.83  299.77 
   4   2   0 4917.61  311.57 
   4   2   0 4787.32  298.97 
   4   2   0 4792.62  298.77 
   4   2   0 4845.82  315.07 
   4   2   0 4859.01  290.57 
   4   2   0 4702.03  295.97 
   4   2   0 4540.75  291.67 
   4   2   0 4805.32  296.57 
   4   2   0 4609.74  289.27 
   4   2   0 4940.21  300.57 
   4   2   0 4771.12  314.87 
   4   2   0 4792.42  295.17 
  -2   4   0 4496.45  308.17 
  -4  -2   0 4489.45  290.97 
   2  -4   0 4716.93  293.57 
   2  -4   0 4680.03  281.17 
   2  -4   0 4702.83  292.27 
   2  -4   0 4491.45  303.57 
  -4  -2   0 4652.43  305.57 
  -2   4   0 4683.23  280.57 
  -2   4   0 4840.02  298.17 
  -2   4   0 4737.63  281.07 
   2  -4   0 4720.53  298.97 
  -2   4   0 5139.49  299.07 
   2  -4   0 4609.24  282.37 
   2  -4   0 4641.74  291.27 
   4   2   0 4776.92  300.67 
   2  -4   0 4661.43  282.47 
   2  -4   0 4648.23  292.17 
   2  -4   0 4609.24  296.77 
  -4  -2   0 4596.64  287.47 
  -4  -2   0 4664.63  297.17 
   4   2   0 4340.07  291.67 
  -2   4   0 4191.08  304.97 
  -2   4   0 4749.82  282.37 
   2  -4   0 4789.42  309.87 
   2  -4   0 4408.46  280.47 
   4   2   0 4675.83  300.17 
   2  -4   0 4296.07  292.37 
   2  -4   0 4744.43  288.97 
   2  -4   0 4670.53  294.97 
   2  -4   0 4520.35  281.27 
   2  -4   0 4744.83  293.37 
  -4  -2   0 4490.05  303.97 
  -4  -2   0 4724.33  294.57 
  -1   4   0 1721.33  119.29 
  -4  -1   0 1684.63  124.09 
  -4  -1   0 1656.33  114.79 
  -1   4   0 1646.84  121.09 
  -1   4   0 1794.02  114.29 
   4   1   0 1708.23  119.09 
   1  -4   0 1649.83  117.59 
   4   1   0 1602.74  115.39 
   1  -4   0 1714.03  123.89 
   1  -4   0 1624.64  114.89 
   4   1   0 1737.43  118.89 
   1  -4   0 1609.34  112.79 
   1  -4   0 1813.52  112.49 
  -1   4   0 1686.63  111.89 
   1  -4   0 1596.34  109.69 
  -4  -1   0 1637.24  123.99 
  -4  -1   0 1824.52  129.69 
  -4  -1   0 1512.55  114.29 
  -4  -1   0 1683.23  117.19 
  -4  -1   0 1727.13  113.19 
  -4  -1   0 1676.03  108.39 
  -4  -1   0 1612.24  114.69 
  -4  -1   0 1574.44  116.59 
  -4  -1   0 1732.83  123.89 
   4   1   0 1758.12  129.99 
   4   1   0 1614.24  122.49 
  -1   4   0 1708.23  121.59 
   1  -4   0 1735.03  119.19 
   1  -4   0 1597.84  114.39 
   1  -4   0 1621.44  120.29 
   1  -4   0 1799.02  117.99 
   1  -4   0 1712.43  127.89 
   1  -4   0 1674.73  108.79 
   4   1   0 1710.13  119.39 
   4   1   0 1686.03  120.19 
  -4  -1   0 1733.73  131.99 
   1  -4   0 1700.43  119.09 
  -4  -1   0 1535.95  129.59 
   1  -4   0 1529.55  111.99 
  -1   4   0 1739.33  109.99 
  -1   4   0 1642.94  110.59 
  -1   4   0 1737.83  116.99 
  -1   4   0 1615.14  113.39 
  -4  -1   0 1629.44  119.69 
   1  -4   0 1741.93  109.59 
  -1   4   0 1550.94  109.59 
  -1   4   0 1644.74  113.89 
  -1   4   0 1705.53  113.99 
  -1   4   0 1740.63  110.89 
   1  -4   0 1769.72  101.99 
   1  -4   0 1701.63  115.49 
   1  -4   0 1774.02  119.29 
   1  -4   0 1751.92  110.49 
   4   1   0 1679.83  121.99 
  -4  -1   0 1477.65  126.59 
  -4  -1   0 1562.54  116.89 
   1  -4   0 1708.73  114.19 
  -4  -1   0 1589.14  116.19 
   1  -4   0 1733.33  123.89 
   1  -4   0 1600.64  110.49 
   4   1   0 1679.73  109.59 
  -4  -1   0 1720.43  115.79 
   4   1   0 1688.73  115.59 
   4   1   0 1773.72  120.59 
   4   1   0 1628.24  113.59 
   4   1   0 1706.23  119.79 
   4   1   0 1640.24  130.59 
   4   1   0 1630.14  123.79 
   1  -4   0 1603.64  111.19 
   1  -4   0 1767.02  117.59 
   4   1   0 1663.63  125.29 
   1  -4   0 1629.64  119.69 
  -4  -1   0 1737.73  118.49 
   1  -4   0 1584.44  116.29 
  -1   4   0 1749.82  112.39 
  -4  -1   0 1668.83  126.49 
  -1   4   0 1705.93  117.49 
  -4  -1   0 1684.33  116.39 
  -4  -1   0 1618.84  122.69 
  -1   4   0 1631.84  126.89 
   4   1   0 1460.55  124.79 
   4   1   0 1709.13  116.89 
   4   1   0 1667.73  119.49 
   1  -4   0 1538.65  121.39 
   1  -4   0 1666.73  109.69 
   1  -4   0 1778.62  105.19 
   4   1   0 1662.03  112.99 
   0  -4   0  198.48   30.40 
   0  -4   0  183.08   29.40 
   0  -4   0  189.78   33.90 
   0  -4   0  169.78   31.20 
   0  -4   0  186.88   13.60 
   4   0   0  251.67   34.50 
  -4   0   0  199.38   34.60 
  -4   0   0  203.88   27.70 
   0  -4   0  171.68   27.20 
   0   4   0  216.48   25.90 
   0  -4   0  215.78   25.90 
   4   0   0  220.98   30.70 
   0   4   0  178.88   25.60 
   0  -4   0  147.09   30.60 
   0   4   0  129.69   23.80 
  -4   0   0  156.48   23.00 
   4   0   0  223.48   39.70 
   4   0   0  226.48   27.90 
   0  -4   0  189.88   26.50 
  -4   0   0  206.58   33.50 
   0  -4   0  220.58   33.80 
  -4   0   0  298.77   36.30 
  -4   0   0  201.88   28.90 
  -4   0   0  194.18   21.10 
  -4   0   0  176.08   24.70 
  -4   0   0  167.68   32.60 
   0  -4   0  166.88   29.00 
   0  -4   0  225.68   30.20 
   0  -4   0  156.28   33.20 
  -4   0   0  268.87   43.70 
   0  -4   0  212.88   14.20 
  -4   0   0  174.18   31.10 
   0   4   0  167.88   28.90 
   0   4   0  154.78   26.90 
   0   4   0  244.08   34.40 
   0   4   0  246.98   41.20 
   0   4   0  186.48   33.20 
   4   0   0  189.88   31.10 
   4   0   0  257.17   36.00 
   4   0   0  303.27   36.90 
   4   0   0  206.68   36.30 
  -4   0   0  176.68   30.90 
   0  -4   0  205.18   26.40 
   0  -4   0  135.99   27.60 
   0  -4   0  207.08   30.20 
   0  -4   0  166.78   28.80 
   0  -4   0  181.98   27.40 
   0  -4   0  191.68   29.30 
   4   0   0  162.18   27.80 
   4   0   0  139.89   28.80 
   4   0   0  208.58   29.70 
   0   4   0  220.28   27.60 
   0   4   0  185.88   24.20 
   0   4   0  182.68   28.00 
   0   4   0  226.88   26.00 
   0   4   0  150.58   24.70 
   0   4   0  199.08   25.70 
   4   0   0  293.67   51.69 
   4   0   0  250.87   40.60 
   4   0   0  305.67   42.50 
   4   0   0  184.98   26.00 
   4   0   0  202.48   38.10 
   4   0   0  162.58   23.70 
   4   0   0  159.38   33.00 
   4   0   0  192.38   27.80 
   4   0   0  166.28   26.30 
  -4   0   0  197.98   35.70 
   4   0   0  200.08   30.20 
   0   4   0  263.37   29.40 
   0  -4   0  170.68   23.80 
   0  -4   0  231.78   33.90 
  -4   0   0  173.48   32.00 
   0  -4   0  163.38   28.80 
   0  -4   0  221.38   28.10 
   0  -4   0  154.78   25.20 
   0  -4   0  138.19   21.90 
   4   0   0  194.78   27.30 
  -4   0   0  221.28   36.60 
  -4   0   0  219.48   33.10 
  -4   0   0  177.48   24.50 
  -4   0   0  182.08   29.40 
   4   0   0  193.58   28.00 
   0  -4   0  190.58   35.10 
   0  -4   0  226.78   25.10 
   0   4   0  171.08   30.70 
   0   4   0  210.78   33.50 
   4  -1   0 1692.73  115.19 
   4  -1   0 1849.91  121.19 
  -1  -4   0 1641.14  120.09 
  -1  -4   0 1524.55  114.19 
   4  -1   0 1688.83  130.39 
  -1  -4   0 1620.04  116.79 
  -1  -4   0 1575.14  117.99 
  -1  -4   0 1612.64  119.59 
   4  -1   0 1745.43  116.59 
  -1  -4   0 1684.63  108.99 
  -1  -4   0 1635.44  109.29 
  -1  -4   0 1737.73  117.39 
   1   4   0 1598.64  114.79 
   1   4   0 1738.83  114.59 
   1   4   0 1729.63  117.39 
   1   4   0 1723.33  119.19 
  -4   1   0 1739.93  108.59 
   1   4   0 1649.93  106.59 
   4  -1   0 1688.63  129.09 
   4  -1   0 1604.54  116.79 
   4  -1   0 1680.93  113.59 
  -1  -4   0 1617.24  117.89 
  -1  -4   0 1677.13  120.69 
  -1  -4   0 1842.92  105.99 
  -1  -4   0 1705.43  119.19 
   4  -1   0 1734.43  122.99 
  -4   1   0 1535.65  113.29 
  -4   1   0 1651.33  113.29 
   1   4   0 1651.63  118.39 
  -1  -4   0 1686.53  118.69 
   4  -1   0 1776.62  118.09 
   4  -1   0 1744.63  112.29 
   4  -1   0 1784.22  112.69 
   4  -1   0 1707.73  120.49 
   4  -1   0 1620.74  109.49 
   4  -1   0 1698.23  110.19 
   4  -1   0 1676.63  115.39 
  -4   1   0 1729.93  109.49 
  -1  -4   0 1727.43  119.39 
  -1  -4   0 1629.44  115.79 
  -1  -4   0 1577.34  117.19 
  -4   1   0 1675.33  119.89 
  -4   1   0 1638.84  114.99 
  -4   1   0 1771.52  116.59 
  -4   1   0 1689.03  108.19 
   1   4   0 1563.34  121.39 
   4  -1   0 1522.05  114.89 
  -4   1   0 1567.44  121.69 
   4  -1   0 1636.04  116.69 
   4  -1   0 1686.23  115.59 
  -4   1   0 1670.93  115.99 
  -4   1   0 1655.43  122.59 
  -1  -4   0 1658.33  108.29 
  -1  -4   0 1538.45  119.69 
  -1  -4   0 1622.04  117.19 
   1   4   0 1785.62  124.49 
   4  -1   0 1714.23  109.29 
   4  -1   0 1627.44  128.29 
   1   4   0 1749.03  108.09 
   4  -1   0 1642.94  133.49 
   4  -1   0 1733.03  110.89 
  -1  -4   0 1706.23  120.19 
  -1  -4   0 1489.35  120.29 
  -4   1   0 1608.44  117.99 
  -4   1   0 1485.55  124.49 
  -4   1   0 1606.34  122.09 
  -4   1   0 1626.94  122.79 
  -4   1   0 1639.04  118.79 
  -4   1   0 1563.04  109.29 
  -1  -4   0 1733.93  115.99 
   1   4   0 1804.62  120.69 
   1   4   0 1691.13  120.69 
   1   4   0 1691.23  116.29 
   1   4   0 1730.73  108.59 
  -1  -4   0 1765.22  123.59 
   1   4   0 1648.34  107.49 
   1   4   0 1799.32  123.09 
   1   4   0 1595.54  107.49 
   1   4   0 1722.93  119.59 
  -1  -4   0 1637.44  124.19 
   4  -1   0 1623.34  111.69 
   1   4   0 1684.43  122.79 
   1   4   0 1648.83  115.29 
   2   4   0 4689.93  295.17 
  -4   2   0 4620.54  288.67 
  -4   2   0 4482.95  288.97 
  -4   2   0 4723.83  290.77 
  -2  -4   0 4582.54  297.17 
  -2  -4   0 4434.76  292.77 
  -4   2   0 4616.04  277.97 
   4  -2   0 4335.97  287.87 
   2   4   0 4699.43  296.87 
   2   4   0 4596.14  300.57 
  -4   2   0 4615.94  285.77 
  -2  -4   0 4491.65  297.17 
   2   4   0 4721.23  303.27 
  -2  -4   0 4195.08  292.37 
   2   4   0 4689.03  293.97 
   4  -2   0 4532.15  289.67 
   4  -2   0 4391.86  294.37 
   2   4   0 4698.33  302.47 
   2   4   0 4735.43  290.97 
   4  -2   0 4551.84  287.27 
  -4   2   0 4384.56  301.67 
  -2  -4   0 4519.65  280.27 
  -2  -4   0 4675.63  296.17 
   4  -2   0 4509.25  288.97 
   4  -2   0 4159.98  283.37 
   4  -2   0 4256.27  301.87 
  -4   2   0 4545.45  289.17 
   4  -2   0 4092.59  295.67 
   4  -2   0 4420.86  306.17 
   4  -2   0 4509.75  277.57 
   4  -2   0 4619.94  305.47 
   4  -2   0 4619.24  279.97 
   4  -2   0 4676.23  289.47 
   4  -2   0 4756.92  278.77 
  -4   2   0 4762.52  284.77 
   2   4   0 4710.63  293.77 
  -4   2   0 4682.43  301.87 
  -4   2   0 4050.59  299.07 
  -4   2   0 4709.73  287.77 
  -4   2   0 4769.82  276.77 
   2   4   0 4740.13  291.87 
   2   4   0 4375.26  281.77 
   2   4   0 4648.44  277.87 
   2   4   0 4611.34  283.17 
   2   4   0 4747.23  295.67 
   2   4   0 4687.83  280.37 
   4  -2   0 4716.83  278.57 
   4  -2   0 4651.83  290.67 
  -2  -4   0 4611.04  290.77 
  -2  -4   0 4417.46  301.87 
   4  -2   0 4318.57  290.37 
   4  -2   0 4615.24  291.57 
   2   4   0 4481.15  288.97 
  -2  -4   0 4753.02  296.47 
   4  -2   0 4544.15  284.87 
  -2  -4   0 4494.65  281.27 
  -2  -4   0 4598.74  291.77 
  -2  -4   0 4529.65  279.97 
  -2  -4   0 4822.92  293.27 
  -4   2   0 4539.45  290.87 
  -4   2   0 4770.22  286.47 
  -2  -4   0 4546.55  279.57 
   4  -2   0 4744.13  290.47 
   4  -2   0 4562.14  289.87 
   4  -2   0 4530.95  279.77 
  -2  -4   0 4594.24  292.77 
   2   4   0 4653.63  292.57 
  -4   2   0 4598.24  292.57 
  -4   2   0 4639.84  276.67 
   4  -2   0 4622.94  306.07 
  -2  -4   0 4455.35  289.27 
  -2  -4   0 4689.23  292.07 
   4  -2   0 4430.86  285.17 
  -2  -4   0 4584.84  290.67 
   2   4   0 4782.52  296.07 
   4  -2   0 4635.44  287.77 
   4  -2   0 4734.33  290.77 
  -2  -4   0 4463.25  296.67 
  -2  -4   0 4571.64  298.47 
   2   4   0 4624.44  292.07 
  -2  -4   0 4791.82  302.57 
  -2  -4   0 4377.16  295.07 
  -2  -4   0 4440.66  295.27 
   3   4   0  261.27   40.40 
   3   4   0  140.19   32.40 
  -3  -4   0  227.68   31.90 
   3   4   0  195.18   34.30 
   4  -3   0  241.88   39.70 
  -3  -4   0  219.98   34.40 
   3   4   0  194.88   30.00 
   3   4   0  238.08   19.70 
   4  -3   0  189.08   43.40 
   4  -3   0  231.08   35.30 
   4  -3   0  255.37   34.30 
   4  -3   0  296.27   38.60 
   4  -3   0  193.58   31.40 
   4  -3   0  208.28   17.30 
  -3  -4   0  209.38   37.70 
   4  -3   0  180.78   36.10 
   3   4   0  214.98   35.10 
  -4   3   0  273.17   38.10 
   3   4   0  260.97   41.80 
  -3  -4   0  222.38   37.10 
   4  -3   0  221.38   33.70 
  -3  -4   0  179.58   35.70 
   4  -3   0  158.88   31.40 
   4  -3   0  187.78   34.60 
   3   4   0  240.98   45.70 
   3   4   0  220.28   35.90 
   3   4   0  219.58   39.10 
   3   4   0  186.58   42.80 
   4  -3   0  198.48   17.00 
   4  -3   0  187.28   33.20 
   4  -3   0  258.07   31.30 
  -3  -4   0  182.98   24.20 
  -3  -4   0  180.08   33.40 
  -3  -4   0  215.18   36.60 
  -3  -4   0  275.07   49.99 
  -4   3   0  222.98   47.30 
   3   4   0  236.18   40.00 
   3   4   0  224.28   44.30 
   3   4   0  273.27   38.20 
   3   4   0  271.77   38.80 
  -4   3   0  230.68   35.60 
   3   4   0  216.38   43.80 
   4  -3   0  246.58   32.50 
   4  -3   0  220.28   34.90 
   4  -3   0  206.78   18.00 
   4  -3   0  189.58   17.00 
   3   4   0  204.78   37.30 
  -4   3   0  203.48   34.00 
  -4   3   0  205.38   28.60 
   4  -3   0  205.98   42.90 
   4  -3   0  220.38   28.90 
  -4   3   0  240.68   45.10 
  -4   3   0  207.18   31.30 
  -4   3   0  154.78   38.20 
   3   4   0  176.78   27.60 
   4  -3   0  198.58   30.80 
  -3  -4   0  209.38   43.20 
  -3  -4   0  201.88   25.20 
  -3  -4   0  200.48   33.70 
  -3  -4   0  236.48   45.40 
  -3  -4   0  188.58   24.00 
  -3  -4   0  235.98   46.80 
   4  -3   0  162.18   31.30 
  -3  -4   0  220.48   41.00 
   3   4   0  163.38   34.40 
   4  -3   0  189.08   16.60 
   4  -3   0  213.88   16.40 
   4  -3   0  219.98   18.20 
   4  -3   0  186.88   43.70 
  -4   3   0  334.37   42.30 
  -4   3   0  201.78   32.90 
  -3  -4   0  256.37   47.50 
  -3  -4   0  253.97   42.40 
  -3  -4   0  134.99   34.90 
  -3  -4   0  303.67   49.10 
  -3  -4   0  271.87   39.40 
   4  -3   0  192.28   44.00 
  -4   3   0  223.38   28.30 
  -3  -4   0  205.18   37.20 
  -3  -4   0  217.08   38.40 
  -4   3   0  195.88   30.60 
  -3  -4   0  244.78   44.10 
  -3  -4   0  163.58   32.40 
  -4   3   0  220.38   31.20 
   4  -4   0   94.19   21.70 
   4  -4   0  107.49   25.90 
   4   4   0  124.39   30.60 
  -4  -4   0   58.19   22.20 
  -4  -4   0  124.09   31.90 
  -4  -4   0  142.89   39.00 
  -4  -4   0  121.99   34.10 
  -4  -4   0  102.59   25.80 
   4   4   0   90.69   26.20 
  -4   4   0   68.19   20.30 
  -4   4   0   89.59   23.30 
  -4   4   0   69.79   21.80 
  -4   4   0  108.09   19.30 
   4   4   0   95.69   28.70 
  -4  -4   0  116.69   29.40 
  -4   4   0   97.69   25.30 
  -4   4   0   97.49   19.80 
  -4   4   0  127.39   28.10 
   4  -4   0  102.49   23.20 
   4  -4   0   80.99   33.60 
   4  -4   0  111.39   29.50 
   4  -4   0  123.69   27.90 
   4  -4   0  112.99   24.50 
   4  -4   0  101.99   26.40 
  -4   4   0   78.29   23.10 
   4   4   0  102.09   35.30 
  -4   4   0  134.39   39.70 
  -4  -4   0  106.59   32.80 
  -4  -4   0   96.19   29.60 
  -4   4   0  107.49   23.60 
  -4   4   0   79.99   22.30 
  -4  -4   0  100.89   24.30 
  -4   4   0  123.69   34.20 
   4  -4   0  134.79   29.60 
   4  -4   0   74.19   25.10 
   4  -4   0  152.48   23.00 
   4  -4   0  110.99   26.70 
   4   4   0  148.69   31.90 
   4  -4   0  122.19   23.80 
  -4  -4   0   52.69   15.00 
  -4  -4   0   99.99   36.00 
   4   4   0  115.59   27.90 
   4   4   0  103.89   17.20 
   4   4   0   88.49   26.80 
   4   4   0  175.38   44.50 
  -4  -4   0   66.19   26.30 
  -4  -4   0   87.39   30.50 
  -4   4   0   75.79   32.50 
  -4   4   0  120.39   28.20 
  -4  -4   0  113.59   18.60 
  -4  -4   0  105.09   37.20 
  -4  -4   0  138.09   33.80 
  -4  -4   0   95.89   29.60 
  -4  -4   0   58.59   28.20 
   4  -4   0   83.69   22.90 
   4  -4   0   83.79   23.60 
   4  -4   0   72.09   34.40 
   4  -4   0   95.19   22.20 
   4  -4   0   86.59   32.10 
  -4  -4   0   36.80   20.20 
  -4  -4   0   95.89   30.70 
  -4  -4   0  131.39   28.50 
  -4  -4   0   89.89   26.80 
   4   4   0  102.19   29.00 
  -4  -4   0  155.08   40.70 
  -4  -4   0  113.99   19.50 
   4  -4   0   73.79   29.00 
   4   4   0  168.28   32.60 
   4   4   0  138.69   32.30 
   4   4   0   71.29   24.00 
   4  -4   0   81.09   23.90 
   4   4   0  103.29   30.80 
   4   4   0  106.39   36.20 
   4   4   0   86.59   22.90 
   4   4   0   78.29   20.10 
  -4  -4   0  148.79   30.80 
  -4   4   0  104.39   19.10 
   4   4   0   59.89   20.20 
   4   4   0  182.98   38.20 
  -5  -4   0  514.75   72.59 
  -4   5   0  468.15   65.59 
  -4   5   0  677.73   70.79 
  -5  -4   0  612.74   73.09 
  -5  -4   0  573.34   68.99 
   4  -5   0  500.15   70.79 
   5   4   0  537.15   81.89 
   5   4   0  589.24   64.99 
   5   4   0  689.73   76.59 
  -4   5   0  478.95   73.89 
  -4   5   0  515.75   45.80 
   4  -5   0  503.55   72.39 
   4  -5   0  478.25   59.79 
   4  -5   0  580.24   67.89 
   4  -5   0  507.85   81.89 
  -4   5   0  605.64   90.19 
  -5  -4   0  719.13   89.29 
  -5  -4   0  607.34   84.89 
   4  -5   0  540.65   55.69 
   4  -5   0  600.74   61.59 
   4  -5   0  508.45   68.19 
   4  -5   0  542.05   65.89 
   4  -5   0  527.15   60.19 
   4  -5   0  495.75   63.79 
   5   4   0  428.06   57.69 
   5   4   0  557.74   45.90 
  -4   5   0  572.14   45.30 
  -4   5   0  494.65   63.99 
   5   4   0  534.15   71.09 
  -5  -4   0  622.34   75.79 
   4  -5   0  401.06   77.89 
   5   4   0  494.45   57.29 
  -4   5   0  398.56   52.69 
  -5  -4   0  646.14   90.69 
  -5  -4   0  439.46   67.99 
  -5  -4   0  563.44   84.69 
  -5  -4   0  478.75   51.49 
  -5  -4   0  484.75   83.49 
  -5  -4   0  520.65   61.39 
  -5  -4   0  559.54   70.59 
   4  -5   0  486.45   58.79 
   4  -5   0  616.24   65.09 
  -5  -4   0  514.85   76.29 
  -5  -4   0  542.15   64.29 
  -5  -4   0  508.75   44.60 
  -5  -4   0  499.35   60.79 
  -4   5   0  415.56   55.69 
  -4   5   0  596.24   65.89 
   5   4   0  737.53   79.89 
  -5  -4   0  493.95   69.19 
   4  -5   0  437.76   60.39 
   5   4   0  604.74   71.89 
   4  -5   0  567.84   69.19 
   5   4   0  567.24   86.19 
  -4   5   0  555.94   45.40 
  -5  -4   0  579.74   75.19 
   5   4   0  657.23   77.59 
   5   4   0  594.24   86.29 
   5   4   0  574.14   66.19 
   5   4   0  488.25   62.99 
   5   4   0  602.14   68.19 
  -5  -4   0  521.45   69.09 
   5   4   0  500.35   69.19 
  -4   5   0  474.45   64.89 
   4  -5   0  446.86   62.89 
   4  -5   0  515.85   80.09 
   4  -5   0  476.35   43.70 
   5   4   0  592.94   80.29 
   4  -5   0  500.85   58.19 
   5   4   0  575.24   72.29 
  -4   5   0  510.45   65.39 
   4  -5   0  484.05   58.59 
  -3   5   0 2150.18  177.48 
   5   3   0 2161.78  155.38 
   3  -5   0 2215.28  155.48 
   5   3   0 2295.07  173.08 
   3  -5   0 2298.27  160.08 
   5   3   0 2060.39  158.48 
  -3   5   0 2250.77  158.18 
   3  -5   0 2268.07  137.39 
   3  -5   0 2342.07  157.68 
   3  -5   0 2166.38  154.78 
   3  -5   0 2344.57  161.58 
  -5  -3   0 2254.17  164.88 
   5   3   0 2448.26  167.68 
   3  -5   0 2285.77  158.98 
   3  -5   0 2268.27  149.29 
  -3   5   0 2446.26  159.78 
  -3   5   0 2067.59  160.58 
   5   3   0 2189.28  164.58 
   5   3   0 2338.27  183.08 
   3  -5   0 2220.98  137.19 
   5   3   0 2613.64  187.98 
  -3   5   0 2104.29  161.48 
   3  -5   0 2288.67  154.38 
  -5  -3   0 2149.58  171.38 
   5   3   0 2544.35  153.48 
   3  -5   0 2226.98  137.99 
  -5  -3   0 2498.05  164.28 
   5   3   0 2123.39  164.08 
  -5  -3   0 2424.66  166.08 
  -5  -3   0 2218.68  172.38 
  -3   5   0 2253.97  159.98 
  -3   5   0 2296.17  153.18 
   3  -5   0 2311.97  137.09 
  -3   5   0 2126.69  166.58 
  -5  -3   0 2096.19  167.58 
  -5  -3   0 2387.16  156.98 
  -5  -3   0 2501.05  179.18 
   3  -5   0 2316.97  164.08 
   5   3   0 2426.66  168.48 
  -5  -3   0 2406.36  166.28 
  -5  -3   0 2199.58  171.18 
  -5  -3   0 2310.27  160.18 
  -5  -3   0 2235.08  149.88 
  -5  -3   0 2369.46  156.18 
  -5  -3   0 2360.96  164.18 
  -5  -3   0 2632.44  166.08 
   3  -5   0 2293.67  147.09 
   5   3   0 2304.37  160.88 
   5   3   0 2292.37  163.78 
   3  -5   0 2278.37  173.68 
   3  -5   0 2234.38  137.49 
   3  -5   0 2086.59  164.28 
   3  -5   0 2370.16  158.28 
   3  -5   0 2210.08  162.28 
   3  -5   0 2057.79  175.88 
   3  -5   0 2297.57  169.28 
   3  -5   0 2228.58  146.29 
   3  -5   0 2145.19  161.88 
   3  -5   0 2118.79  154.08 
  -5  -3   0 2217.68  172.28 
  -3   5   0 2188.38  175.98 
  -3   5   0 2338.57  159.68 
  -3   5   0 2265.27  167.18 
   3  -5   0 2105.29  157.08 
  -5  -3   0 2391.26  160.38 
  -5  -3   0 2293.57  181.48 
   5   3   0 2370.86  163.48 
   5   3   0 2202.78  165.38 
   5   3   0 2637.44  181.98 
   5   3   0 2240.88  157.58 
   5   3   0 2305.47  164.78 
   5   3   0 2338.37  179.18 
  -3   5   0 2365.36  158.68 
  -3   5   0 2284.77  143.79 
   5   3   0 2323.47  155.98 
   5   3   0 2499.15  164.88 
  -5  -3   0 2195.68  181.78 
  -3   5   0 2324.57  144.49 
   5   3   0 2379.76  166.48 
  -3   5   0 2242.38  149.59 
   3  -5   0 2176.38  160.38 
  -2   5   0  307.17   53.49 
  -5  -2   0  335.87   48.70 
  -2   5   0  341.77   44.00 
   5   2   0  422.96   69.49 
  -2   5   0  349.87   30.00 
  -2   5   0  308.07   23.60 
   5   2   0  331.67   42.00 
  -2   5   0  340.67   44.60 
   2  -5   0  289.67   41.30 
  -5  -2   0  323.47   60.59 
  -2   5   0  359.56   49.80 
  -5  -2   0  359.46   41.90 
   2  -5   0  326.87   30.50 
   2  -5   0  325.07   50.29 
   2  -5   0  296.27   56.79 
   2  -5   0  213.78   45.90 
  -2   5   0  375.46   45.00 
   2  -5   0  299.37   27.00 
   2  -5   0  317.67   28.20 
   2  -5   0  276.57   31.60 
   2  -5   0  286.17   41.60 
   2  -5   0  351.46   45.50 
   2  -5   0  357.56   52.09 
   2  -5   0  377.16   27.40 
   2  -5   0  351.46   27.50 
   2  -5   0  298.67   45.50 
   2  -5   0  370.46   49.99 
   2  -5   0  296.57   40.50 
   2  -5   0  392.36   54.49 
  -5  -2   0  358.76   50.99 
   2  -5   0  296.27   44.00 
   2  -5   0  327.67   31.70 
   2  -5   0  331.37   44.70 
   2  -5   0  327.67   29.80 
   2  -5   0  385.66   50.29 
   2  -5   0  280.77   49.70 
  -5  -2   0  396.56   48.40 
   5   2   0  326.57   50.69 
   5   2   0  324.87   50.19 
   5   2   0  231.88   50.19 
   5   2   0  379.36   46.00 
   5   2   0  317.57   52.99 
   5   2   0  271.57   53.99 
   5   2   0  368.46   52.09 
   5   2   0  312.47   47.20 
   5   2   0  342.37   51.69 
   5   2   0  300.47   53.59 
  -2   5   0  290.87   32.80 
   2  -5   0  345.37   29.40 
  -5  -2   0  378.76   40.90 
   5   2   0  278.87   46.10 
  -5  -2   0  294.87   43.10 
  -2   5   0  307.57   49.99 
  -2   5   0  222.68   50.09 
  -2   5   0  354.76   52.69 
   5   2   0  360.16   48.70 
  -5  -2   0  475.55   65.59 
  -5  -2   0  417.56   60.39 
  -5  -2   0  429.26   48.50 
  -5  -2   0  423.66   64.49 
  -5  -2   0  381.66   58.99 
  -5  -2   0  299.77   41.20 
   5   2   0  345.17   44.10 
   5   2   0  198.98   40.90 
   2  -5   0  328.17   48.30 
  -2   5   0  336.47   48.20 
   5   2   0  261.87   45.10 
  -5  -2   0  337.27   47.70 
  -5  -2   0  357.86   55.79 
  -5  -2   0  451.25   52.49 
   2  -5   0  316.47   38.70 
   5   2   0  280.07   44.40 
  -2   5   0  342.87   39.20 
  -5  -2   0  440.56   54.89 
  -5  -2   0  333.77   57.19 
  -2   5   0  323.77   32.20 
  -5  -2   0  287.27   43.30 
  -2   5   0  283.57   35.80 
   5   2   0  366.36   46.60 
   2  -5   0  330.27   43.70 
   5   2   0  375.26   41.40 
  -5  -2   0  250.27   53.79 
  -2   5   0  329.17   43.10 
   1  -5   0  384.26   42.30 
  -1   5   0  334.87   43.20 
   1  -5   0  430.96   56.39 
   1  -5   0  325.47   45.30 
   5   1   0  307.37   39.60 
  -5  -1   0  299.47   49.60 
  -5  -1   0  352.46   47.00 
   1  -5   0  400.96   47.50 
  -5  -1   0  367.66   47.20 
  -5  -1   0  358.96   42.90 
  -5  -1   0  325.07   33.70 
  -1   5   0  275.37   37.40 
  -1   5   0  323.87   46.90 
   5   1   0  353.16   51.79 
  -5  -1   0  333.57   43.50 
   1  -5   0  315.37   35.30 
   1  -5   0  313.97   43.50 
  -1   5   0  374.36   41.60 
   5   1   0  321.57   54.79 
   5   1   0  333.57   44.80 
   5   1   0  371.96   46.20 
   5   1   0  309.17   47.10 
   5   1   0  395.66   45.90 
   5   1   0  349.77   47.10 
   5   1   0  295.37   55.89 
   1  -5   0  409.66   53.89 
   1  -5   0  326.27   42.50 
   1  -5   0  360.66   48.50 
   1  -5   0  258.17   39.60 
   1  -5   0  339.37   48.40 
   1  -5   0  397.96   42.60 
  -5  -1   0  351.66   58.69 
   5   1   0  293.77   40.20 
  -5  -1   0  365.76   54.59 
   5   1   0  312.67   51.19 
  -5  -1   0  337.17   47.90 
  -5  -1   0  271.27   48.50 
  -1   5   0  323.87   48.30 
   1  -5   0  391.66   53.09 
   1  -5   0  332.17   45.30 
   5   1   0  371.26   56.39 
   5   1   0  311.57   53.49 
   1  -5   0  319.17   34.90 
   1  -5   0  283.27   33.50 
  -5  -1   0  308.97   40.20 
  -5  -1   0  312.47   42.50 
  -5  -1   0  323.37   43.10 
   1  -5   0  299.87   42.70 
   1  -5   0  330.37   40.20 
   5   1   0  321.37   35.60 
   1  -5   0  315.67   24.00 
   1  -5   0  310.87   50.19 
  -1   5   0  298.07   36.00 
   1  -5   0  324.27   37.50 
   1  -5   0  262.97   42.40 
   5   1   0  332.67   54.79 
   1  -5   0  276.57   48.20 
   1  -5   0  308.67   38.20 
  -5  -1   0  314.77   49.20 
   1  -5   0  358.66   39.40 
  -5  -1   0  238.08   48.00 
  -5  -1   0  230.88   49.30 
   5   1   0  332.07   47.40 
   5   1   0  346.97   46.00 
  -5  -1   0  240.38   48.50 
   5   1   0  388.66   50.39 
  -1   5   0  359.76   45.60 
  -1   5   0  267.87   38.80 
  -1   5   0  290.07   43.10 
  -1   5   0  250.67   50.19 
  -1   5   0  319.07   49.50 
  -1   5   0  383.86   42.40 
  -5  -1   0  306.27   57.69 
  -1   5   0  344.77   37.20 
  -1   5   0  342.77   38.70 
   5   1   0  302.17   46.00 
  -5  -1   0  314.17   43.60 
   1  -5   0  319.77   36.50 
  -1   5   0  280.27   36.30 
   5   1   0  301.37   47.10 
  -5  -1   0  310.97   41.60 
   1  -5   0  295.97   38.50 
   0   5   0    1.30    7.20 
   0   5   0   -1.50   14.10 
  -5   0   0   -5.40   14.00 
   0  -5   0    2.60    7.70 
   0  -5   0    2.70   10.90 
   0   5   0   -9.70    8.80 
   0   5   0   18.50   16.00 
   0   5   0   -9.90    8.30 
  -5   0   0   -7.60    7.70 
   5   0   0   12.10   10.80 
   0  -5   0   -2.20    9.80 
  -5   0   0   -0.20   10.10 
  -5   0   0   12.70   11.80 
   0  -5   0    4.80   11.10 
  -5   0   0   -1.50   11.40 
   0  -5   0    6.10   11.00 
   0  -5   0   19.00   15.70 
   0  -5   0    6.70   11.50 
   0  -5   0    3.30   12.90 
   5   0   0  -17.90   15.10 
   0  -5   0    6.20    9.60 
   0  -5   0   -0.80    8.40 
   0   5   0   12.50   12.90 
   0  -5   0   11.80   12.30 
   0  -5   0    4.60    7.50 
   0  -5   0    3.80   13.40 
   0   5   0    3.60    7.80 
  -5   0   0   -1.80   11.40 
   5   0   0   -2.30    7.60 
  -5   0   0   -9.30    8.80 
  -5   0   0   -5.10    9.90 
   0  -5   0    3.30    7.70 
   0  -5   0    7.90    9.70 
   5   0   0  -10.30    7.60 
   0  -5   0    3.80    9.20 
   0  -5   0   34.70   21.30 
   0  -5   0   16.50   15.90 
   0  -5   0    1.30   10.60 
   0   5   0    9.90   13.90 
   0   5   0   -6.90    5.80 
   0   5   0  -10.40   11.10 
   0   5   0    3.30    8.50 
   0  -5   0   11.00    9.60 
  -5   0   0    0.20    9.40 
   0   5   0   -7.90    8.50 
   5   0   0   27.30   20.00 
   5   0   0   45.40   20.70 
   5   0   0    8.60   12.20 
   0   5   0   13.30   11.10 
   0  -5   0   -7.80    7.50 
   5   0   0    2.70   10.40 
   5   0   0   11.50   16.20 
   5   0   0   -2.80    8.70 
  -5   0   0   -4.10   11.90 
  -5   0   0    4.60    8.30 
   5   0   0   -1.00    9.90 
   5   0   0   -3.70    8.50 
   5   0   0    3.70    8.70 
   5   0   0   14.50   18.10 
   5   0   0    4.60   14.10 
   0   5   0    2.40   10.10 
   5   0   0    2.40   10.20 
  -5   0   0   -7.10    5.90 
   0  -5   0   -2.40   11.70 
  -5   0   0    2.80   15.20 
  -5   0   0   10.00   13.90 
   0  -5   0  -11.00   10.60 
  -5   0   0   11.00   15.80 
  -5   0   0   11.70    7.50 
   5   0   0  -13.40    7.10 
   5   0   0    5.10   11.70 
   0   5   0    5.40   10.40 
   0   5   0    4.50   10.80 
   0  -5   0   -3.60    6.80 
   5   0   0   -0.30   14.10 
   0   5   0    2.00   10.00 
  -5   0   0    8.50   16.20 
   5   0   0  -13.00    6.50 
  -5   0   0   13.10    8.60 
   0  -5   0   -9.80    7.80 
   5   0   0   -5.20    8.10 
  -5   0   0   11.10   12.90 
  -5   0   0   -0.40   11.60 
   5   0   0    6.70    9.60 
  -1  -5   0  298.87   49.00 
   1   5   0  354.96   51.99 
   1   5   0  328.37   34.00 
   1   5   0  283.97   24.80 
   5  -1   0  241.18   44.50 
  -5   1   0  299.07   45.40 
   1   5   0  336.57   49.40 
  -5   1   0  260.67   44.00 
   5  -1   0  351.76   41.50 
  -1  -5   0  264.67   39.00 
  -1  -5   0  328.37   49.20 
  -5   1   0  257.27   45.30 
  -1  -5   0  357.06   50.29 
  -1  -5   0  322.77   24.00 
  -1  -5   0  389.86   37.20 
   5  -1   0  247.58   39.70 
   5  -1   0  315.77   35.50 
   1   5   0  365.26   45.90 
   1   5   0  274.47   32.50 
   1   5   0  334.97   46.70 
   1   5   0  317.97   41.80 
   1   5   0  285.37   46.30 
   1   5   0  315.67   44.80 
   1   5   0  305.87   46.60 
  -5   1   0  249.38   44.40 
   5  -1   0  339.47   47.40 
  -5   1   0  300.27   32.50 
  -5   1   0  317.97   42.50 
  -5   1   0  294.77   39.10 
  -1  -5   0  332.67   46.00 
  -1  -5   0  394.96   49.20 
  -1  -5   0  262.77   43.90 
  -1  -5   0  337.77   49.50 
   1   5   0  328.17   33.90 
  -1  -5   0  287.47   33.50 
  -1  -5   0  233.58   42.00 
  -5   1   0  292.17   47.50 
   1   5   0  329.47   41.80 
   5  -1   0  377.36   42.40 
  -1  -5   0  332.17   35.20 
  -1  -5   0  313.37   49.20 
   5  -1   0  295.97   41.20 
   1   5   0  333.87   45.50 
  -5   1   0  402.66   59.39 
  -1  -5   0  394.36   32.70 
  -5   1   0  304.87   48.70 
   5  -1   0  260.97   35.20 
   5  -1   0  343.57   46.60 
  -5   1   0  332.97   43.60 
  -5   1   0  350.56   36.30 
   5  -1   0  303.97   53.79 
   5  -1   0  373.16   48.20 
   5  -1   0  350.06   37.10 
   5  -1   0  297.27   42.10 
   5  -1   0  346.77   48.90 
   5  -1   0  336.67   44.90 
   5  -1   0  308.97   38.50 
   5  -1   0  248.58   49.00 
   1   5   0  270.07   39.70 
  -1  -5   0  312.67   25.60 
  -1  -5   0  261.97   43.90 
  -5   1   0  402.76   39.80 
   1   5   0  389.56   57.39 
  -1  -5   0  353.86   37.10 
   5  -1   0  319.17   42.50 
  -1  -5   0  311.77   45.70 
  -1  -5   0  284.67   44.80 
  -1  -5   0  264.37   39.30 
  -1  -5   0  311.97   42.10 
  -1  -5   0  402.56   50.79 
   5  -1   0  267.97   53.09 
   1   5   0  298.37   33.20 
  -5   1   0  266.87   39.70 
   5  -1   0  399.56   50.59 
   5  -1   0  296.47   37.80 
  -1  -5   0  303.07   44.50 
  -1  -5   0  349.47   46.20 
   5  -1   0  437.76   72.19 
   5  -1   0  336.07   37.40 
  -5   1   0  361.66   47.90 
  -5   1   0  380.16   46.10 
  -1  -5   0  273.47   48.90 
   1   5   0  303.87   41.10 
  -1  -5   0  257.27   39.50 
   2   5   0  299.07   47.60 
   5  -2   0  337.27   37.10 
   5  -2   0  275.17   42.90 
   2   5   0  271.87   49.20 
   2   5   0  480.85   60.69 
  -2  -5   0  302.77   54.09 
   5  -2   0  366.96   42.70 
   2   5   0  305.77   28.60 
   5  -2   0  299.37   47.20 
   2   5   0  357.56   50.89 
  -5   2   0  289.77   40.90 
   2   5   0  305.27   43.80 
  -2  -5   0  269.67   48.00 
  -5   2   0  365.56   48.50 
  -2  -5   0  328.77   47.00 
   5  -2   0  267.77   42.40 
   2   5   0  331.17   50.09 
   5  -2   0  349.96   34.30 
   5  -2   0  328.67   58.79 
  -2  -5   0  304.37   46.70 
  -5   2   0  313.87   56.09 
  -5   2   0  304.37   52.99 
   2   5   0  399.56   52.59 
  -5   2   0  398.96   57.19 
  -5   2   0  305.07   44.00 
   5  -2   0  353.66   47.60 
  -2  -5   0  225.08   41.40 
   5  -2   0  423.26   39.20 
  -2  -5   0  299.67   33.40 
   5  -2   0  363.26   41.10 
  -2  -5   0  261.87   45.80 
   5  -2   0  384.66   39.20 
  -2  -5   0  326.87   49.80 
  -2  -5   0  310.47   33.90 
  -2  -5   0  291.47   44.00 
  -2  -5   0  328.57   50.79 
  -2  -5   0  420.36   51.19 
  -2  -5   0  355.86   51.49 
  -2  -5   0  317.67   51.39 
  -2  -5   0  437.46   54.09 
  -5   2   0  347.67   29.50 
  -5   2   0  319.17   42.60 
  -5   2   0  321.97   40.30 
   2   5   0  377.56   52.79 
  -5   2   0  365.26   44.60 
   2   5   0  358.16   54.69 
  -5   2   0  340.97   29.50 
  -2  -5   0  370.06   36.90 
   5  -2   0  326.37   34.10 
   5  -2   0  365.96   48.70 
   5  -2   0  384.86   49.99 
   5  -2   0  344.67   50.09 
   5  -2   0  421.16   68.99 
  -2  -5   0  306.67   50.19 
   5  -2   0  297.87   56.99 
   5  -2   0  403.36   48.10 
   5  -2   0  283.57   49.80 
  -5   2   0  325.67   48.30 
  -2  -5   0  296.47   44.20 
  -2  -5   0  431.96   60.89 
  -2  -5   0  358.46   35.70 
  -5   2   0  311.77   30.00 
   2   5   0  331.17   47.60 
  -5   2   0  372.26   50.39 
  -2  -5   0  344.27   51.29 
  -5   2   0  299.57   43.60 
   2   5   0  391.46   49.00 
   2   5   0  359.86   35.40 
   2   5   0  344.67   38.80 
   5  -2   0  425.26   70.09 
   5  -2   0  409.96   57.99 
   5  -2   0  293.77   40.80 
  -2  -5   0  320.57   51.69 
  -2  -5   0  353.66   51.29 
   5  -2   0  285.87   41.30 
   2   5   0  434.36   61.59 
  -5   2   0  281.47   42.80 
  -2  -5   0  382.96   52.69 
   2   5   0  367.76   50.79 
   2   5   0  339.67   44.20 
   5  -3   0 2299.57  160.88 
  -3  -5   0 2170.98  163.68 
  -3  -5   0 2051.79  166.48 
   3   5   0 2389.26  159.78 
   3   5   0 2335.47  163.28 
  -3  -5   0 2311.77  170.58 
   3   5   0 2394.16  152.48 
   3   5   0 2326.17  141.79 
   5  -3   0 2344.47  142.09 
   3   5   0 2194.28  159.38 
  -3  -5   0 2204.98  166.78 
  -3  -5   0 2240.88  170.48 
   5  -3   0 2382.06  164.98 
  -3  -5   0 2382.16  147.39 
   5  -3   0 2162.28  161.38 
  -3  -5   0 2570.34  164.88 
  -5   3   0 2574.74  180.88 
  -3  -5   0 2519.05  165.18 
  -3  -5   0 2249.47  146.39 
   3   5   0 2310.27  175.38 
   3   5   0 2246.38  164.68 
   5  -3   0 2222.28  140.89 
   5  -3   0 2141.89  147.19 
  -5   3   0 2161.38  152.48 
   5  -3   0 2040.60  158.58 
   5  -3   0 2326.67  143.09 
   5  -3   0 2223.08  158.88 
   3   5   0 2232.78  152.78 
   3   5   0 2251.77  164.88 
  -3  -5   0 2414.26  163.88 
  -3  -5   0 2496.25  166.18 
  -5   3   0 2061.99  172.88 
  -3  -5   0 2244.28  168.08 
  -3  -5   0 2308.87  176.48 
  -5   3   0 2296.97  174.48 
  -3  -5   0 2310.97  146.09 
  -5   3   0 2224.48  147.59 
   3   5   0 2318.87  162.58 
   5  -3   0 2336.07  156.58 
  -5   3   0 2325.17  138.89 
   5  -3   0 2410.66  182.58 
   3   5   0 2503.75  191.88 
   3   5   0 2396.96  167.68 
  -5   3   0 2223.58  168.58 
  -5   3   0 2302.47  159.18 
   5  -3   0 2377.76  170.28 
  -5   3   0 2105.69  160.58 
  -5   3   0 2339.87  162.38 
  -3  -5   0 2228.58  162.48 
  -3  -5   0 2414.16  174.78 
  -3  -5   0 2147.89  162.28 
   5  -3   0 2231.88  142.09 
   5  -3   0 2311.07  159.88 
   5  -3   0 2213.38  170.78 
  -5   3   0 2260.07  151.18 
   5  -3   0 2234.38  152.88 
  -3  -5   0 2065.39  164.18 
  -3  -5   0 2444.96  162.58 
  -3  -5   0 2353.86  177.58 
   3   5   0 2336.47  177.68 
  -5   3   0 2268.87  154.38 
  -5   3   0 2110.99  159.08 
  -5   3   0 2529.75  160.18 
   5  -3   0 2130.69  176.08 
   5  -3   0 2206.78  144.19 
  -3  -5   0 2492.85  173.98 
   5  -3   0 2262.57  158.98 
   5  -3   0 2249.87  152.38 
   5  -3   0 2047.40  174.38 
  -3  -5   0 2100.89  165.38 
   5  -3   0 2335.87  156.48 
  -3  -5   0 2199.38  158.18 
   3   5   0 2238.58  163.98 
   5  -3   0 2269.97  156.58 
   3   5   0 2202.08  162.88 
   5  -3   0 2319.67  162.68 
  -5   3   0 2273.17  157.98 
  -3  -5   0 2294.27  166.18 
   5  -3   0 2393.56  144.99 
   3   5   0 2061.99  164.08 
   5  -3   0 1985.30  173.48 
  -3  -5   0 2333.67  152.28 
   3   5   0 2158.78  162.78 
   5  -3   0 2361.56  142.99 
   3   5   0 2395.26  167.58 
   5  -3   0 2287.57  161.98 
   5  -4   0  632.74   65.89 
   4   5   0  460.85   67.09 
   5  -4   0  396.26   50.79 
   4   5   0  550.14   57.49 
   4   5   0  681.03   73.19 
  -4  -5   0  556.84   73.69 
  -5   4   0  581.84   65.99 
   4   5   0  450.65   75.69 
   4   5   0  546.55   66.49 
   4   5   0  490.65   66.99 
  -5   4   0  354.36   69.39 
   4   5   0  557.14   60.39 
  -4  -5   0  474.35   63.59 
  -4  -5   0  372.66   63.19 
   5  -4   0  519.45   85.89 
   5  -4   0  463.95   74.19 
   5  -4   0  513.35   67.49 
  -5   4   0  532.55   53.19 
  -4  -5   0  551.04   72.79 
   5  -4   0  438.06   81.89 
  -4  -5   0  495.95   43.00 
  -4  -5   0  471.05   56.19 
  -4  -5   0  511.35   40.80 
  -4  -5   0  533.25   63.29 
  -4  -5   0  595.14   69.09 
   4   5   0  505.25   76.69 
   4   5   0  569.64   73.09 
   5  -4   0  493.75   63.79 
   5  -4   0  619.54   66.19 
  -4  -5   0  556.04   73.49 
  -4  -5   0  546.65   76.89 
  -4  -5   0  429.46   70.89 
   5  -4   0  475.45   56.99 
   4   5   0  561.34   70.79 
  -5   4   0  465.55   62.19 
  -5   4   0  593.44   59.69 
  -5   4   0  491.35   64.19 
   5  -4   0  613.74   67.09 
  -5   4   0  580.14   83.39 
  -4  -5   0  577.34   66.09 
   5  -4   0  498.15   64.89 
   4   5   0  410.96   63.89 
   4   5   0  533.45   66.89 
   5  -4   0  609.54   63.69 
   5  -4   0  469.25   68.89 
   5  -4   0  471.35   37.60 
  -5   4   0  495.95   54.19 
  -4  -5   0  567.74   78.69 
  -5   4   0  514.65   61.59 
  -5   4   0  604.14   63.59 
  -4  -5   0  580.84   44.90 
  -4  -5   0  517.35   68.19 
  -4  -5   0  618.14   76.69 
  -4  -5   0  404.66   65.29 
   5  -4   0  597.74   57.19 
   4   5   0  470.25   64.09 
   4   5   0  562.84   71.69 
  -5   4   0  539.75   56.99 
   5  -4   0  466.75   65.99 
   5  -4   0  386.26   71.99 
   5  -4   0  574.34   65.59 
   5  -4   0  542.05   59.59 
   4   5   0  542.35   81.69 
  -4  -5   0  568.34   45.00 
   5  -4   0  445.66   61.29 
  -4  -5   0  574.64   70.19 
  -4  -5   0  657.33   91.49 
   5  -4   0  580.14   67.39 
   4   5   0  619.94   67.79 
  -5   4   0  514.45   65.29 
   5  -4   0  534.15   54.79 
  -4  -5   0  518.55   81.59 
  -5   4   0  630.44   84.39 
   5  -5   0 3303.17  243.78 
   5  -5   0 2850.11  230.18 
  -5  -5   0 3321.67  199.78 
  -5  -5   0 3124.79  212.78 
  -5  -5   0 3403.06  212.28 
   5  -5   0 3158.98  212.88 
   5  -5   0 2989.70  211.18 
   5  -5   0 2950.80  200.78 
  -5  -5   0 3156.98  235.18 
  -5  -5   0 3251.57  200.08 
  -5  -5   0 3297.07  243.48 
  -5   5   0 3092.29  201.28 
  -5   5   0 3001.40  208.58 
  -5   5   0 3150.68  212.88 
   5  -5   0 3131.19  207.08 
   5  -5   0 3153.68  216.88 
  -5  -5   0 2822.42  231.48 
   5   5   0 3116.19  214.68 
  -5  -5   0 3119.49  224.08 
   5   5   0 3073.39  207.68 
   5   5   0 3241.68  214.88 
   5   5   0 3319.47  218.38 
   5   5   0 3137.39  224.38 
  -5  -5   0 2908.31  213.58 
  -5  -5   0 3284.87  212.28 
   5  -5   0 3016.80  228.08 
   5   5   0 3589.94  247.48 
   5  -5   0 2940.91  210.28 
   5  -5   0 2804.02  204.58 
  -5   5   0 2944.81  210.68 
   5   5   0 3208.28  224.38 
  -5  -5   0 2977.40  218.48 
   5  -5   0 3107.19  210.58 
  -5  -5   0 2786.72  221.08 
  -5  -5   0 3252.37  221.68 
   5   5   0 3275.67  216.38 
   5   5   0 3252.27  220.98 
   5  -5   0 3132.49  208.58 
   5  -5   0 3145.89  245.38 
  -5  -5   0 3026.80  233.08 
   5  -5   0 3201.88  217.68 
   5   5   0 3084.99  211.38 
   5   5   0 3464.25  223.28 
  -5  -5   0 2960.30  222.78 
  -5   5   0 3082.59  216.18 
  -5   5   0 3153.18  211.88 
  -5   5   0 2834.62  210.08 
  -5  -5   0 2998.60  224.98 
   5   5   0 3409.26  234.68 
  -5  -5   0 3129.19  198.48 
   5   5   0 3007.50  218.58 
   5   5   0 3197.58  221.48 
  -5   5   0 2954.30  215.18 
   5  -5   0 3131.49  212.58 
   5  -5   0 3040.20  220.28 
  -5  -5   0 3135.79  222.58 
   5  -5   0 2963.80  216.28 
  -5   5   0 3105.59  240.78 
  -5  -5   0 2709.83  225.68 
   5  -5   0 3199.18  226.58 
  -5   5   0 3177.28  218.28 
  -5   5   0 3042.30  202.58 
  -5  -5   0 2878.11  220.68 
   5   5   0 3488.75  244.18 
   5   5   0 3503.65  220.78 
   5  -5   0 2944.41  210.58 
  -5   5   0 2965.80  231.18 
  -5  -5   0 3264.87  198.18 
  -5  -5   0 3554.34  236.78 
  -5   5   0 2994.20  201.38 
   5  -5   0 2777.72  211.48 
  -5   5   0 2921.91  215.28 
   6   5   0  472.05   73.09 
  -5   6   0  384.76   58.09 
  -6  -5   0  421.46   75.19 
  -6  -5   0  540.95   69.79 
   6   5   0  464.95   63.79 
  -6  -5   0  384.26   65.99 
  -6  -5   0  508.95   72.79 
  -5   6   0  499.65   70.49 
  -5   6   0  441.96   60.79 
  -5   6   0  444.66   64.89 
  -6  -5   0  406.06   71.69 
   5  -6   0  467.75   62.19 
   6   5   0  549.65   73.59 
   5  -6   0  511.85   57.59 
   6   5   0  541.55   87.99 
   6   5   0  297.47   58.09 
  -6  -5   0  378.26   79.09 
  -5   6   0  481.75   50.69 
   6   5   0  417.96   61.79 
   6   5   0  388.86   76.59 
  -6  -5   0  341.47   65.99 
   5  -6   0  445.46   60.19 
   5  -6   0  454.15   60.09 
   5  -6   0  577.64   98.39 
  -6  -5   0  328.37   69.59 
  -5   6   0  384.36   65.09 
  -6  -5   0  559.44   78.99 
  -6  -5   0  555.64   86.69 
   6   5   0  546.35   75.89 
   5  -6   0  473.85   79.99 
  -5   6   0  391.76   54.69 
  -6  -5   0  634.74   67.99 
   5  -6   0  573.44   74.19 
   5  -6   0  347.77   65.79 
  -6  -5   0  425.86   80.29 
   5  -6   0  447.06   82.09 
   5  -6   0  509.85   76.09 
  -5   6   0  420.26   76.09 
   6   5   0  484.15   71.39 
   5  -6   0  489.75   70.89 
   6   5   0  590.94   72.29 
   6   5   0  614.24   93.49 
   6   5   0  320.67   54.39 
   5  -6   0  453.45   66.49 
   5  -6   0  445.56   65.89 
   5  -6   0  448.06   62.59 
   5  -6   0  410.16   59.09 
  -6  -5   0  514.05   77.59 
  -6  -5   0  341.67   69.89 
  -5   6   0  504.25   50.59 
  -6  -5   0  428.66   61.89 
   5  -6   0  486.65   67.89 
  -5   6   0  385.96   78.69 
  -6  -5   0  539.35   77.79 
  -5   6   0  409.36   60.59 
   6   5   0  395.56   59.99 
   6   5   0  470.35   60.39 
   5  -6   0  608.34   77.99 
  -5   6   0  483.15   68.79 
  -5   6   0  434.16   64.69 
  -5   6   0  420.56   50.89 
   6   5   0  628.24   77.29 
   5  -6   0  325.87   53.39 
   5  -6   0  454.95   62.29 
   6   5   0  531.15   85.69 
   6   5   0  488.95   74.49 
  -6  -5   0  411.96   68.29 
  -6  -4   0  699.93   94.69 
  -6  -4   0  581.64   93.79 
   6   4   0  455.45   71.69 
   4  -6   0  558.74   67.29 
   6   4   0  630.94   93.29 
   4  -6   0  554.44   68.09 
   4  -6   0  517.35   63.99 
  -6  -4   0  503.65   77.29 
  -4   6   0  585.34   67.19 
  -4   6   0  421.66   59.59 
   6   4   0  615.54   69.99 
   4  -6   0  575.94   68.49 
   6   4   0  625.44   59.59 
  -6  -4   0  499.05   68.99 
  -6  -4   0  647.64   80.79 
  -6  -4   0  605.54   88.79 
  -6  -4   0  537.45   64.79 
  -4   6   0  581.24   71.39 
   4  -6   0  605.04   56.39 
   6   4   0  590.74   66.99 
   4  -6   0  583.64   73.59 
   6   4   0  568.04   73.19 
  -6  -4   0  700.93   97.99 
  -4   6   0  548.15   57.09 
  -6  -4   0  569.74   77.09 
  -6  -4   0  479.75   55.39 
  -6  -4   0  465.35   72.99 
   6   4   0  569.84   73.79 
   6   4   0  492.65   79.09 
   6   4   0  436.76   70.09 
   6   4   0  530.65   73.79 
   6   4   0  630.64   91.29 
   6   4   0  592.24   71.69 
   6   4   0  621.14   93.99 
  -4   6   0  494.15   42.80 
  -4   6   0  571.04   72.89 
  -4   6   0  480.55   43.20 
  -6  -4   0  446.46   65.59 
  -4   6   0  397.06   64.79 
   6   4   0  480.85   71.99 
   6   4   0  618.64   71.39 
  -6  -4   0  676.93   90.79 
  -4   6   0  572.94   61.69 
   4  -6   0  606.14   60.89 
   4  -6   0  446.16   66.29 
  -4   6   0  541.55   89.39 
   4  -6   0  629.44   74.39 
  -6  -4   0  409.76   69.29 
  -6  -4   0  609.84   68.79 
   4  -6   0  579.54   74.89 
   4  -6   0  516.05   69.69 
   4  -6   0  588.14   81.79 
   4  -6   0  535.65   45.60 
   4  -6   0  551.64   64.69 
  -6  -4   0  548.75   84.69 
   4  -6   0  671.63   93.49 
   4  -6   0  451.95   86.39 
  -4   6   0  454.55   70.99 
   4  -6   0  533.45   65.69 
   6   4   0  647.54   80.89 
   4  -6   0  457.95   68.89 
  -4   6   0  427.66   63.49 
  -4   6   0  485.75   79.19 
   6   4   0  506.95   68.39 
   6   4   0  469.75   61.79 
  -6  -4   0  530.95   55.69 
   4  -6   0  645.34   68.59 
   4  -6   0  404.06   70.09 
  -6  -4   0  484.95   70.39 
  -6  -3   0 1305.47  111.09 
   3  -6   0 1143.69   99.29 
  -3   6   0  918.11   89.49 
   3  -6   0 1164.68   98.39 
  -6  -3   0 1201.88  125.59 
   6   3   0 1153.98  116.69 
  -6  -3   0 1149.58  103.39 
  -3   6   0 1147.69  118.49 
  -6  -3   0 1042.60   85.29 
   6   3   0 1135.39   92.89 
   3  -6   0 1213.88  131.69 
   3  -6   0 1120.59   94.79 
   3  -6   0 1099.09   93.59 
   3  -6   0 1134.29   91.19 
   3  -6   0 1171.68   95.79 
   6   3   0 1262.17  105.89 
   6   3   0 1139.49   96.69 
   6   3   0 1047.20   95.39 
   3  -6   0 1139.39   88.89 
   6   3   0 1310.07  103.29 
   6   3   0 1175.28   89.09 
  -6  -3   0 1109.09  125.69 
   3  -6   0 1135.89   79.89 
  -3   6   0 1304.57  139.89 
   3  -6   0 1256.07  102.69 
   3  -6   0 1025.80   90.69 
   6   3   0  992.60   92.79 
   3  -6   0 1182.08  138.29 
   3  -6   0 1102.19   79.49 
  -6  -3   0 1226.18  130.39 
  -6  -3   0  971.10  113.29 
  -6  -3   0 1211.48   91.29 
  -3   6   0 1104.09  119.09 
  -6  -3   0 1175.58  102.79 
  -3   6   0 1074.39   85.19 
  -3   6   0 1067.29   93.59 
  -3   6   0 1189.58   88.19 
   3  -6   0 1182.18  101.99 
   6   3   0 1096.89  100.79 
   3  -6   0 1125.29   72.39 
   3  -6   0 1065.49   93.39 
  -6  -3   0 1223.58  134.89 
  -6  -3   0 1193.48   98.19 
   6   3   0 1278.07   90.79 
   3  -6   0 1054.59  117.89 
   6   3   0 1240.88  104.29 
   6   3   0 1099.49  125.39 
  -3   6   0 1190.78   74.79 
  -3   6   0 1123.09  100.79 
  -3   6   0 1075.29   92.99 
  -3   6   0 1053.89   97.09 
   3  -6   0 1125.59   99.89 
   3  -6   0 1191.68   78.69 
   3  -6   0 1051.89   95.89 
   6   3   0  974.90  120.89 
  -6  -3   0 1058.89   88.39 
  -6  -3   0 1172.58   99.59 
  -6  -3   0 1100.69   96.39 
  -6  -3   0 1389.96   97.79 
   6   3   0 1004.00   97.79 
   6   3   0 1173.48  102.09 
  -6  -3   0 1094.19   99.59 
  -6  -3   0 1241.98  129.49 
   6   3   0 1103.19  127.79 
   6   3   0 1100.19  100.19 
  -6  -3   0 1147.89   98.79 
   6   3   0 1239.18   94.69 
   3  -6   0 1144.39   83.29 
  -6  -2   0  700.33   77.49 
   6   2   0  538.85   71.89 
   2  -6   0  633.34   63.29 
  -6  -2   0  627.84   84.79 
  -6  -2   0  677.43   86.89 
  -6  -2   0  650.73   87.89 
   2  -6   0  523.25   68.29 
  -6  -2   0  609.04   85.19 
  -2   6   0  602.64   53.69 
   2  -6   0  562.84   46.70 
  -6  -2   0  444.86   65.29 
  -6  -2   0  637.44   52.89 
  -6  -2   0  596.64   70.79 
  -6  -2   0  630.24   70.69 
   6   2   0  591.04   75.89 
   6   2   0  601.54   85.19 
   6   2   0  591.54   64.69 
   6   2   0  734.93   89.29 
   6   2   0  469.85   78.79 
   6   2   0  714.23   81.59 
   6   2   0  592.44   72.79 
   6   2   0  595.34   53.29 
  -6  -2   0  581.04   76.59 
   2  -6   0  699.13   61.29 
   6   2   0  596.24   73.69 
  -2   6   0  640.04   72.59 
   6   2   0  680.53   70.59 
  -6  -2   0  677.93   78.59 
   6   2   0  684.63   89.69 
   2  -6   0  619.44   48.40 
  -6  -2   0  630.14   85.39 
  -2   6   0  611.74   69.79 
  -6  -2   0  571.34   61.89 
  -6  -2   0  674.93   76.39 
  -2   6   0  562.34   86.49 
   2  -6   0  633.34   79.69 
   2  -6   0  599.44   68.89 
   6   2   0  723.53   84.09 
   2  -6   0  506.55   67.49 
  -6  -2   0  636.74   85.59 
  -6  -2   0  703.43   94.19 
  -2   6   0  550.44   50.99 
   2  -6   0  582.44   49.60 
   6   2   0  518.25   66.99 
   6   2   0  549.74   73.39 
   2  -6   0  642.64   73.89 
  -6  -2   0  608.94   67.79 
  -6  -2   0  727.43   95.19 
   6   2   0  862.41   89.99 
  -6  -2   0  546.95   63.69 
   2  -6   0  602.34   81.99 
  -2   6   0  597.24   73.39 
  -2   6   0  701.53   69.49 
  -2   6   0  556.24   72.09 
  -2   6   0  625.54   49.60 
   6   2   0  513.55   64.49 
   2  -6   0  579.74   73.19 
   2  -6   0  579.14   47.40 
   6   2   0  659.63   68.19 
  -2   6   0  729.33   82.99 
   2  -6   0  588.04   70.39 
  -2   6   0  623.24   80.59 
  -2   6   0  643.24   50.39 
   2  -6   0  695.83   55.49 
   2  -6   0  636.94   44.90 
   2  -6   0  603.04   66.69 
   2  -6   0  650.83   75.39 
  -2   6   0  596.74   49.99 
  -2   6   0  644.34   67.59 
   6   2   0  659.13   76.49 
   2  -6   0  656.33   91.69 
   2  -6   0  638.54   80.29 
   2  -6   0  630.64   82.29 
   2  -6   0  657.53   70.09 
   2  -6   0  542.35   73.49 
   2  -6   0  606.44   48.80 
   2  -6   0  655.53   70.09 
  -6  -1   0   42.80   19.50 
   6   1   0   17.60   15.90 
   1  -6   0   22.60   16.40 
  -6  -1   0   22.50   14.40 
  -6  -1   0   -0.20   11.00 
  -6  -1   0   24.80   23.60 
  -6  -1   0   23.20   18.30 
  -1   6   0  105.79   31.80 
   6   1   0    8.60   15.40 
   1  -6   0   20.20   20.00 
   6   1   0   11.40   15.30 
   6   1   0   29.10   18.10 
   1  -6   0   32.00   16.00 
  -6  -1   0   28.70   14.30 
   6   1   0   17.10   15.60 
   1  -6   0   23.20   16.00 
   6   1   0   19.80   18.10 
   1  -6   0   -2.00    8.90 
   1  -6   0    4.10   12.80 
   1  -6   0   15.30   13.20 
   1  -6   0   51.49   18.30 
  -6  -1   0   22.60   27.10 
   6   1   0   83.69   24.60 
   1  -6   0   12.80   15.00 
   1  -6   0    3.90   17.60 
  -6  -1   0   21.90   19.00 
  -6  -1   0   34.20   21.60 
  -6  -1   0   18.70   15.40 
  -6  -1   0   17.70   11.50 
   6   1   0   42.40   23.90 
  -1   6   0   19.90   14.40 
  -6  -1   0   -7.80   16.60 
   1  -6   0    1.00   17.40 
   1  -6   0   21.10   19.30 
   1  -6   0   -3.00   16.30 
   6   1   0   16.60   28.00 
  -1   6   0   28.00   15.80 
  -1   6   0    6.60   13.90 
  -1   6   0   22.00   22.00 
  -1   6   0   26.80   21.90 
  -1   6   0   -5.10   10.60 
  -1   6   0   -7.30    9.70 
   6   1   0   10.80   14.10 
  -1   6   0   61.59   17.70 
   1  -6   0   36.90   19.80 
   6   1   0   49.70   28.70 
  -6  -1   0   30.40   23.90 
  -6  -1   0   26.70   19.80 
   1  -6   0   32.50   13.80 
   6   1   0   15.10   11.20 
   1  -6   0  -11.50   12.80 
  -6  -1   0   21.10   19.20 
   6   1   0   39.70   15.50 
   6   1   0   -5.70   18.50 
   6   1   0   52.49   26.40 
   1  -6   0    0.20   14.40 
   1  -6   0   35.10   14.60 
   1  -6   0   15.80   12.40 
   6   1   0    8.50   15.60 
  -1   6   0   -1.10   12.00 
   1  -6   0   29.00   23.50 
  -6  -1   0    4.80   12.80 
  -6  -1   0   -5.70   17.70 
  -6  -1   0   39.40   17.90 
  -6  -1   0   49.70   26.40 
  -1   6   0    9.80   17.00 
  -1   6   0    0.80   10.10 
   1  -6   0   33.70   15.40 
  -1   6   0   30.30   12.70 
   1  -6   0   46.20   20.50 
   1  -6   0   13.00   12.10 
   1  -6   0   15.80   14.00 
  -6  -1   0   31.60   16.40 
   6   1   0    8.10   21.10 
   6   1   0   32.40   21.00 
  -1   6   0   42.60   17.90 
  -1   6   0   15.90   14.90 
   6   1   0   15.30   16.60 
  -6  -1   0   28.30   20.50 
   6   1   0    3.70   22.80 
   1  -6   0    3.40    9.20 
   0   6   0 2370.06  168.38 
  -6   0   0 2354.86  179.48 
   0   6   0 2256.37  156.48 
  -6   0   0 2227.98  170.68 
   6   0   0 2669.73  183.48 
  -6   0   0 2523.45  168.28 
  -6   0   0 2452.35  165.68 
  -6   0   0 2488.25  173.88 
   0  -6   0 2282.57  174.88 
   6   0   0 2477.35  164.78 
  -6   0   0 2040.90  168.38 
   0  -6   0 2353.16  160.88 
   0  -6   0 2453.15  166.58 
   0  -6   0 2328.17  177.28 
   6   0   0 2334.87  167.18 
   0   6   0 2249.47  165.38 
   6   0   0 2541.95  199.08 
   6   0   0 2466.25  165.18 
   6   0   0 2324.87  148.69 
   6   0   0 2359.16  160.98 
   6   0   0 2354.56  180.08 
   6   0   0 2458.85  173.88 
   6   0   0 2389.76  159.08 
   0   6   0 2251.37  165.88 
   0  -6   0 2402.46  167.68 
   6   0   0 2454.25  160.48 
   6   0   0 2506.75  169.98 
  -6   0   0 2361.36  160.48 
   0  -6   0 2380.16  168.98 
   6   0   0 2460.25  179.18 
   0   6   0 2424.16  162.78 
   6   0   0 2444.16  170.78 
  -6   0   0 2301.37  166.88 
  -6   0   0 2337.97  166.28 
   6   0   0 2398.16  176.98 
  -6   0   0 2317.77  180.58 
   0   6   0 2305.77  169.18 
   6   0   0 2438.26  160.58 
  -6   0   0 2467.25  176.78 
  -6   0   0 2217.98  161.78 
   0   6   0 2283.27  160.28 
   0  -6   0 2363.06  169.68 
  -6   0   0 2329.97  178.28 
   6   0   0 2405.16  164.68 
   0   6   0 2387.76  164.38 
   0   6   0 2208.08  177.58 
   0   6   0 2162.08  171.48 
   0   6   0 2099.49  160.88 
   0   6   0 2273.37  155.28 
   6   0   0 2368.06  153.68 
   0  -6   0 2292.87  152.68 
   0   6   0 2378.96  175.18 
   0   6   0 2270.17  154.38 
   0   6   0 2116.49  166.78 
  -6   0   0 2433.36  167.58 
   0  -6   0 2458.65  158.88 
   0  -6   0 2523.55  171.08 
   0  -6   0 2314.17  173.38 
   6   0   0 2598.64  185.68 
   0  -6   0 2454.45  172.78 
  -6   0   0 2250.07  157.68 
   0  -6   0 2356.46  159.08 
   0  -6   0 2329.37  158.48 
   0  -6   0 2033.50  160.98 
   0  -6   0 2385.06  169.18 
   0  -6   0 2115.49  154.38 
   0  -6   0 2257.17  172.08 
   0   6   0 2401.16  157.88 
   0  -6   0 2209.98  158.78 
   6   0   0 2293.37  164.28 
  -6   0   0 2543.95  164.48 
   0  -6   0 2123.19  155.48 
   6   0   0 2409.16  168.08 
  -6   0   0 2305.07  158.78 
  -6   0   0 2364.16  171.38 
   0  -6   0 2282.77  159.68 
   0   6   0 2287.67  154.88 
  -6   0   0 2399.16  166.28 
   6   0   0 2165.98  165.58 
   6   0   0 2355.96  165.58 
   0  -6   0 2260.47  165.38 
   0  -6   0 2302.17  167.18 
   0  -6   0 2327.47  164.28 
   0  -6   0 2211.38  155.08 
  -1  -6   0   18.60   19.10 
   1   6   0   22.20   16.50 
  -1  -6   0    7.60   19.20 
  -6   1   0   24.60   17.30 
   1   6   0   24.50   17.30 
   1   6   0   16.20   17.40 
   6  -1   0    0.80   13.40 
   6  -1   0   26.40   18.80 
  -6   1   0   29.30   19.90 
  -6   1   0    1.00   15.50 
  -1  -6   0   18.00   16.30 
   1   6   0   61.99   15.20 
   1   6   0    3.10   11.60 
   6  -1   0   54.09   31.90 
  -6   1   0   18.30   14.90 
  -1  -6   0   29.30   13.60 
   1   6   0   23.90   19.90 
   1   6   0   51.09   14.40 
   1   6   0   31.70   20.60 
   1   6   0    9.50   13.40 
   1   6   0   16.80    9.80 
  -6   1   0   22.60   24.90 
  -1  -6   0   15.30   18.10 
  -1  -6   0   27.40   16.60 
  -1  -6   0   35.00   25.40 
   6  -1   0   45.40   29.60 
   1   6   0    4.90   15.50 
  -1  -6   0   -1.40   12.70 
   6  -1   0   31.80   17.70 
   6  -1   0   46.20   21.40 
   6  -1   0    7.80   14.90 
   6  -1   0   -1.90   16.00 
   6  -1   0   24.20   17.80 
   6  -1   0   19.20   16.60 
  -6   1   0  -17.90   10.50 
  -1  -6   0   19.70   17.10 
   6  -1   0   31.70   15.70 
   1   6   0   30.80   15.10 
  -1  -6   0   24.60   12.10 
  -1  -6   0   16.40   15.00 
   1   6   0   19.50   16.00 
  -1  -6   0   31.40   22.00 
  -1  -6   0   -3.80   13.40 
  -1  -6   0   25.70   18.00 
  -1  -6   0   24.00   11.60 
   6  -1   0   45.30   20.00 
  -1  -6   0   33.80   13.60 
   6  -1   0   20.60   13.70 
   6  -1   0    5.40   11.20 
  -6   1   0   -2.00   11.40 
   6  -1   0    5.90   12.20 
  -1  -6   0   27.70   15.70 
  -6   1   0    7.90   10.70 
   6  -1   0    0.50   12.60 
  -1  -6   0   25.80   21.80 
  -6   1   0   31.40   17.90 
  -1  -6   0   28.00   20.00 
  -6   1   0   23.80   16.00 
  -6   1   0   -0.30   17.10 
  -6   1   0    8.30    9.90 
  -6   1   0    8.80   19.20 
  -1  -6   0   -9.60    9.00 
   1   6   0   28.00   15.20 
  -1  -6   0   26.90   19.40 
  -6   1   0   11.80   16.50 
  -1  -6   0    4.70   17.20 
  -6   1   0   23.00   15.40 
  -6   1   0   35.60   13.00 
  -6   1   0  -10.00   12.90 
   1   6   0   10.60   17.00 
   6  -1   0   15.10   22.90 
  -1  -6   0   17.40   11.50 
  -1  -6   0   22.60   15.80 
   6  -1   0   16.40   13.60 
   6  -1   0   54.49   19.40 
   6  -1   0    6.40   13.90 
   6  -1   0   42.80   25.50 
   1   6   0    3.50   13.30 
   1   6   0   32.90   23.00 
   6  -1   0    9.70   17.40 
  -1  -6   0   28.10   19.20 
  -1  -6   0   15.50    6.70 
  -2  -6   0  498.15   78.09 
  -2  -6   0  684.93   84.69 
  -2  -6   0  787.62   85.99 
   2   6   0  644.64   70.39 
  -6   2   0  638.74   81.49 
  -2  -6   0  556.74   48.60 
   2   6   0  618.24   81.69 
   6  -2   0  664.53   58.09 
  -6   2   0  693.53   72.89 
   2   6   0  693.03   76.19 
   6  -2   0  720.23   77.49 
   6  -2   0  664.53   93.89 
  -6   2   0  698.03   86.39 
   2   6   0  645.64   49.20 
  -2  -6   0  627.64   79.99 
   2   6   0  600.24   75.29 
   6  -2   0  680.33   70.89 
   2   6   0  611.54   76.69 
   2   6   0  680.83   77.29 
   6  -2   0  592.24   52.19 
   6  -2   0  704.03   77.19 
  -2  -6   0  482.25   64.19 
  -2  -6   0  644.24   78.59 
  -2  -6   0  655.43   49.70 
  -6   2   0  621.64   49.70 
  -2  -6   0  639.44   76.49 
   6  -2   0  567.24   71.89 
  -2  -6   0  742.93   76.39 
   6  -2   0  537.75   59.09 
  -6   2   0  708.83   60.89 
  -2  -6   0  618.34   50.19 
   2   6   0  626.94   50.69 
  -2  -6   0  624.04   76.39 
   2   6   0  631.24   81.29 
  -2  -6   0  531.95   70.59 
  -6   2   0  729.33   60.39 
  -6   2   0  678.53   77.69 
  -6   2   0  722.33   84.19 
  -2  -6   0  491.05   68.89 
  -2  -6   0  576.84   49.30 
   6  -2   0  597.04   52.99 
  -2  -6   0  755.22   80.59 
   6  -2   0  655.13   97.89 
   6  -2   0  608.74   52.39 
   2   6   0  641.24   68.89 
  -2  -6   0  593.44   48.00 
  -6   2   0  648.64   88.39 
  -6   2   0  687.53   75.49 
  -6   2   0  680.53   71.39 
   2   6   0  604.64   50.59 
   6  -2   0  735.33   83.79 
  -2  -6   0  586.24   47.30 
   6  -2   0  423.06   76.19 
  -2  -6   0  496.65   67.89 
  -2  -6   0  636.84   82.09 
   6  -2   0  676.03   71.89 
   6  -2   0  834.52   93.09 
   2   6   0  517.25   73.79 
   6  -2   0  560.44   50.29 
   6  -2   0  567.84   83.59 
   6  -2   0  581.94   54.49 
   6  -2   0  682.13   74.09 
  -2  -6   0  686.43   85.79 
  -2  -6   0  764.62   84.39 
   6  -2   0  637.44   72.89 
   6  -2   0  593.54   79.89 
  -6   2   0  529.65   69.69 
   2   6   0  698.83   74.09 
  -2  -6   0  801.72   84.89 
   2   6   0  605.84   74.39 
   6  -2   0  680.93   72.59 
  -6   2   0  853.11   84.19 
  -6   2   0  652.13   79.09 
   6  -2   0  752.72   78.59 
   2   6   0  796.82   91.69 
   2   6   0  597.64   73.19 
  -6   2   0  648.84   50.59 
  -2  -6   0  726.23   75.29 
   6  -3   0 1119.79   91.69 
   3   6   0 1032.00   84.99 
  -3  -6   0 1055.99   76.19 
  -3  -6   0 1058.99  113.89 
   3   6   0 1243.08   97.99 
  -6   3   0 1041.60   92.09 
   3   6   0 1064.59   97.29 
  -6   3   0 1217.88  126.89 
   3   6   0 1065.19   96.19 
  -6   3   0  877.01   98.19 
  -3  -6   0 1012.00   96.29 
   6  -3   0 1020.80   76.29 
   3   6   0 1143.19  117.29 
  -3  -6   0 1176.58  101.99 
  -6   3   0 1315.77  132.69 
  -3  -6   0 1017.80  117.89 
   6  -3   0 1104.29   94.29 
  -3  -6   0 1105.59   93.69 
   3   6   0 1119.99  100.49 
   6  -3   0 1110.89   94.69 
   6  -3   0  917.41   90.79 
  -6   3   0 1059.39   97.69 
   6  -3   0 1168.58   80.69 
   6  -3   0 1230.78   98.19 
  -3  -6   0 1204.18   95.89 
  -3  -6   0 1266.67  132.19 
   3   6   0 1133.99   98.99 
   6  -3   0 1069.69   94.59 
  -3  -6   0  937.51  109.19 
   6  -3   0 1191.38   78.49 
  -3  -6   0 1048.60  110.79 
   6  -3   0  951.60  115.49 
   6  -3   0 1138.39   89.29 
  -3  -6   0 1247.08  125.99 
   6  -3   0 1091.29   88.89 
  -6   3   0 1124.69   88.09 
   6  -3   0 1039.30   96.29 
  -3  -6   0 1096.49   77.19 
  -6   3   0 1129.09   85.39 
   6  -3   0 1084.19   96.99 
   6  -3   0 1153.28   91.19 
   3   6   0 1012.90  116.89 
   6  -3   0 1088.29  131.29 
   6  -3   0  970.80  119.29 
   6  -3   0 1076.99   79.09 
   6  -3   0 1153.68  134.09 
   3   6   0 1186.98   95.19 
   3   6   0 1137.59   91.79 
   3   6   0 1188.88   98.89 
  -6   3   0 1077.29   95.09 
  -3  -6   0 1060.49  116.69 
  -6   3   0 1115.39   73.99 
  -3  -6   0 1133.19  115.69 
  -6   3   0 1036.60   93.19 
  -6   3   0 1028.50   89.29 
   6  -3   0 1141.89   77.49 
   6  -3   0  989.80  113.59 
  -3  -6   0 1087.39   98.79 
  -3  -6   0 1323.87  102.19 
   6  -3   0 1020.70   81.19 
   6  -3   0 1272.77  136.59 
  -3  -6   0 1074.69   75.99 
   6  -3   0 1082.89   79.39 
   3   6   0 1291.07  102.39 
  -6   3   0 1180.88  124.89 
  -3  -6   0 1145.99   95.99 
  -3  -6   0 1103.59  117.89 
  -3  -6   0 1197.98  120.09 
   3   6   0 1165.58  101.29 
  -6   3   0 1083.49   89.29 
  -3  -6   0 1109.59   83.19 
   3   6   0 1193.78  102.99 
  -3  -6   0 1120.39   97.49 
   4   6   0  473.85   62.89 
   6  -4   0  528.25   64.69 
  -6   4   0  503.45   83.29 
  -4  -6   0  752.82   86.39 
  -4  -6   0  533.95   71.19 
  -6   4   0  442.96   66.79 
   4   6   0  554.64   71.79 
   6  -4   0  442.36   65.89 
  -6   4   0  473.55   57.39 
   6  -4   0  493.15   75.79 
   6  -4   0  461.95   57.09 
  -4  -6   0  422.56   76.39 
  -6   4   0  551.14   56.89 
  -4  -6   0  427.96   68.79 
   4   6   0  503.45   83.99 
   4   6   0  491.05   70.29 
   4   6   0  586.24   74.29 
   4   6   0  525.25   58.59 
   6  -4   0  692.83   80.09 
  -6   4   0  547.55   68.49 
  -4  -6   0  489.65   58.89 
   4   6   0  463.75   68.19 
  -4  -6   0  425.16   41.50 
   6  -4   0  483.15   69.39 
  -4  -6   0  584.14   69.89 
   4   6   0  489.45   82.19 
   4   6   0  632.34   80.99 
   6  -4   0  554.44   89.29 
   6  -4   0  503.75   65.69 
  -6   4   0  599.14   72.99 
   6  -4   0  508.25   88.99 
   6  -4   0  531.65   63.69 
   6  -4   0  518.15   83.59 
   6  -4   0  610.54   55.19 
   6  -4   0  447.66   84.89 
  -4  -6   0  477.15   68.39 
   4   6   0  676.83   78.89 
  -4  -6   0  593.04   75.79 
   6  -4   0  614.44   72.89 
   6  -4   0  535.25   68.59 
   4   6   0  485.05   69.59 
  -4  -6   0  612.54   76.49 
   4   6   0  580.34   63.39 
   6  -4   0  410.26   67.39 
   6  -4   0  584.14   67.79 
  -4  -6   0  656.53   87.09 
   4   6   0  562.64   72.49 
  -4  -6   0  498.85   64.69 
   6  -4   0  461.35   58.29 
  -4  -6   0  558.54   81.49 
   4   6   0  583.14   72.79 
  -6   4   0  538.25   83.29 
  -4  -6   0  437.36   56.79 
   6  -4   0  470.25   56.19 
   4   6   0  477.35   69.99 
  -6   4   0  427.96   63.79 
  -6   4   0  495.25   65.19 
  -6   4   0  476.75   61.79 
  -6   4   0  582.44   69.29 
  -4  -6   0  415.66   77.69 
  -4  -6   0  493.35   74.69 
  -4  -6   0  535.75   75.79 
   4   6   0  509.95   82.49 
  -4  -6   0  527.75   81.69 
  -4  -6   0  603.64   81.89 
   6  -4   0  543.05   73.29 
  -4  -6   0  512.95   73.09 
  -6   4   0  491.75   59.79 
   5   6   0  402.56   62.59 
  -6   5   0  602.94   92.59 
  -5  -6   0  485.45   75.79 
  -5  -6   0  435.16   71.29 
  -6   5   0  448.36   61.59 
   6  -5   0  579.64   67.29 
  -5  -6   0  383.26   65.09 
  -5  -6   0  566.14   75.99 
  -5  -6   0  454.25   77.89 
   6  -5   0  341.87   59.19 
   5   6   0  536.65   65.69 
  -5  -6   0  447.86   62.29 
  -6   5   0  493.55   82.29 
   6  -5   0  365.36   62.19 
   5   6   0  470.65   74.49 
   5   6   0  466.45   66.59 
   5   6   0  436.26   80.69 
   6  -5   0  502.55   70.89 
   6  -5   0  391.36   70.19 
   6  -5   0  369.76   65.79 
  -6   5   0  443.76   66.79 
   6  -5   0  398.06   59.99 
   6  -5   0  494.85   61.79 
   6  -5   0  531.15   93.19 
   6  -5   0  498.35   64.39 
   6  -5   0  476.85   56.09 
  -6   5   0  444.96   53.39 
   6  -5   0  529.55   56.59 
   6  -5   0  511.35   62.79 
   5   6   0  386.96   61.29 
   6  -5   0  428.76   79.59 
  -5  -6   0  430.36   77.69 
   5   6   0  409.56   76.79 
  -5  -6   0  432.86   73.79 
  -5  -6   0  466.15   68.89 
  -5  -6   0  541.35   80.19 
  -6   5   0  422.16   59.09 
  -5  -6   0  545.05   82.09 
  -5  -6   0  546.55   66.39 
  -5  -6   0  525.85   72.59 
  -5  -6   0  435.26   71.39 
  -6   5   0  519.55   61.49 
   6  -5   0  413.26   86.49 
  -6   5   0  533.45   68.09 
  -6   5   0  479.55   68.59 
   5   6   0  481.35   59.69 
  -5  -6   0  436.36   79.79 
   6  -5   0  569.94   73.89 
   5   6   0  510.95   73.79 
  -5  -6   0  491.55   85.29 
   5   6   0  444.76   85.99 
   5   6   0  331.47   61.79 
   6  -5   0  459.15   83.09 
   5   6   0  454.85   70.59 
  -5  -6   0  532.15   66.49 
   5   6   0  576.94   79.09 
   5   6   0  555.44   72.69 
  -6   5   0  538.45   70.79 
   5   6   0  376.76   61.59 
  -6   5   0  521.05   58.29 
   6  -5   0  521.15   68.39 
  -6   5   0  492.45   56.19 
   5   6   0  431.86   66.89 
   6  -5   0  391.56   60.29 
  -6   5   0  576.64   75.49 
  -5  -6   0  450.75   81.49 
  -6   6   0  797.42   88.89 
   6  -6   0  918.61  108.09 
  -6   6   0  655.23   84.09 
   6  -6   0  651.63  103.39 
  -6  -6   0  708.03   95.79 
  -6  -6   0  890.41  116.49 
   6   6   0  933.61  104.29 
   6   6   0 1180.28  135.79 
  -6  -6   0  863.11  106.49 
   6  -6   0  693.23   91.99 
  -6  -6   0  837.92  113.19 
  -6  -6   0  863.31   90.49 
   6  -6   0  700.33   97.89 
  -6  -6   0  848.72   93.29 
   6  -6   0  707.73   88.09 
   6  -6   0  850.81   92.09 
  -6  -6   0  747.23  100.29 
   6   6   0  732.13   94.79 
  -6  -6   0  975.40  121.29 
   6  -6   0  821.92   88.29 
   6   6   0  886.91  118.89 
  -6   6   0  800.72   68.69 
  -6   6   0  756.52   94.09 
   6  -6   0  765.02   88.09 
   6   6   0  667.53   94.39 
  -6   6   0  732.43   95.39 
  -6  -6   0  876.71   91.79 
   6   6   0 1062.19  104.39 
   6   6   0  634.84   87.69 
  -6   6   0  655.43   90.49 
  -6  -6   0  678.13   95.59 
   6   6   0  790.82   95.79 
  -6   6   0  793.52  117.99 
   6  -6   0  911.41   97.29 
   6  -6   0  788.92  103.89 
   6  -6   0  810.02   88.99 
  -6  -6   0  800.52  115.49 
  -6  -6   0  789.22  113.49 
  -6   6   0  791.02   76.09 
  -6   6   0  826.82   86.89 
   6   6   0  907.51   99.19 
  -6   6   0  671.43   90.59 
  -6  -6   0  588.14   87.19 
   6   6   0  889.71   96.49 
  -6  -6   0  854.21  108.99 
   6  -6   0  742.93   88.29 
   6  -6   0  782.02   84.29 
   6  -6   0  772.42   91.69 
   6  -6   0  626.94   90.09 
  -6  -6   0  830.92  107.09 
   6   6   0  719.53   82.69 
   6   6   0  832.82  103.39 
  -6  -6   0  757.42   99.19 
  -6   6   0  836.62  113.09 
   6   6   0  709.13  100.09 
   6  -6   0  954.80  126.89 
  -6   6   0  670.43   86.79 
   6  -6   0  821.92  127.69 
  -6  -6   0  663.33   87.19 
   6  -6   0  709.13   79.29 
  -6   6   0  727.83   84.59 
   6   6   0  930.81  120.19 
   6   6   0  829.42   90.59 
  -7  -6   0  444.66   82.49 
   6  -7   0  590.94   77.99 
  -7  -6   0  445.96   68.29 
   7   6   0  622.34   99.79 
  -7  -6   0  568.44   99.49 
   6  -7   0  444.56   96.79 
  -7  -6   0  441.56   87.79 
  -7  -6   0  686.53   90.69 
   7   6   0  484.85   67.59 
   7   6   0  490.65   93.59 
  -6   7   0  580.24   85.59 
  -7  -6   0  471.25   82.89 
   7   6   0  567.54   82.69 
  -6   7   0  448.86   63.99 
   7   6   0  713.23   88.99 
  -7  -6   0  380.26   69.99 
  -7  -6   0  502.75   86.89 
   6  -7   0  410.16   73.19 
   6  -7   0  535.65   87.19 
   7   6   0  441.96   79.29 
   6  -7   0  596.44   76.19 
  -7  -6   0  606.94   83.09 
  -6   7   0  506.85   78.79 
  -6   7   0  408.76   70.09 
  -6   7   0  389.56   62.89 
  -6   7   0  457.45   88.89 
   6  -7   0  451.65   83.29 
  -7  -6   0  532.25   95.49 
   6  -7   0  442.96   71.59 
   7   6   0  424.96   68.79 
   7   6   0  531.55   80.69 
   7   6   0  602.04   89.69 
  -7  -6   0  531.75   95.89 
  -6   7   0  535.35   74.49 
  -7  -6   0  454.25   81.69 
  -7  -6   0  573.64   76.39 
   7   6   0  523.45   74.99 
  -7  -6   0  444.26   77.69 
   6  -7   0  472.15   75.69 
   7   6   0  700.53  106.39 
  -7  -6   0  494.05   88.19 
   6  -7   0  535.65   75.49 
   6  -7   0  443.36   86.59 
   6  -7   0  537.85   72.79 
  -6   7   0  425.76   68.79 
   7   6   0  575.14   84.69 
  -6   7   0  582.74  104.59 
   6  -7   0  547.75  100.49 
   6  -7   0  489.85   66.49 
   6  -7   0  494.65   73.89 
  -6   7   0  458.65   76.29 
  -5   7   0   49.10   39.40 
   7   5   0   69.89   29.20 
   7   5   0   94.99   39.30 
  -5   7   0   42.60   27.10 
  -7  -5   0  106.19   40.70 
   7   5   0  186.08   60.99 
  -7  -5   0  165.38   57.29 
   7   5   0  119.69   38.80 
   7   5   0   75.19   39.90 
   5  -7   0  102.09   42.40 
   5  -7   0  127.49   34.50 
  -5   7   0   10.50   21.90 
   5  -7   0   60.79   32.00 
   7   5   0   80.59   33.90 
   5  -7   0  109.29   49.90 
  -5   7   0  118.99   30.40 
   5  -7   0  106.79   33.80 
  -7  -5   0  113.29   43.90 
  -7  -5   0  145.19   45.30 
   5  -7   0  112.89   35.50 
  -5   7   0  134.59   44.10 
  -5   7   0  116.59   33.30 
   7   5   0   68.19   33.40 
  -5   7   0  109.09   41.10 
   5  -7   0   76.29   31.20 
  -7  -5   0  130.89   39.40 
   7   5   0   23.20   26.20 
  -7  -5   0   32.10   33.60 
  -7  -5   0   86.99   34.50 
  -7  -5   0   76.59   39.40 
   7   5   0   60.29   33.00 
   5  -7   0   52.39   31.40 
   5  -7   0  106.69   38.60 
  -7  -5   0  101.69   39.30 
  -7  -5   0   46.40   32.60 
  -5   7   0   50.59   25.00 
  -7  -5   0   88.89   44.70 
  -5   7   0   61.69   29.00 
   7   5   0   76.59   43.10 
  -5   7   0    8.70   29.10 
  -7  -5   0   11.50   25.20 
   5  -7   0  148.89   50.29 
   7   5   0  100.29   30.90 
  -7  -5   0   90.19   41.20 
   5  -7   0   50.59   26.00 
  -5   7   0   47.00   30.40 
  -7  -5   0   81.69   44.40 
   5  -7   0   85.99   33.70 
  -7  -5   0  126.89   35.50 
   5  -7   0  136.49   39.10 
   5  -7   0  112.99   40.40 
  -7  -5   0  120.09   45.00 
   7   5   0   48.60   28.20 
   7   5   0   96.79   35.40 
   7   5   0   64.99   30.10 
   5  -7   0   66.29   28.40 
   5  -7   0   59.79   36.90 
   4  -7   0   21.10   25.70 
  -7  -4   0  108.79   34.30 
  -7  -4   0   96.89   42.20 
   4  -7   0   45.40   27.80 
   7   4   0   51.69   35.00 
  -4   7   0   23.60   20.70 
  -7  -4   0   39.20   29.10 
   4  -7   0   18.00   20.70 
   4  -7   0   54.49   29.00 
   7   4   0   30.50   22.30 
   4  -7   0   57.19   29.80 
  -7  -4   0   65.09   42.80 
   4  -7   0   86.09   28.00 
  -7  -4   0   96.99   45.40 
  -7  -4   0   50.59   31.40 
   7   4   0   63.29   30.90 
  -7  -4   0   16.70   24.40 
  -7  -4   0   36.80   28.50 
  -4   7   0  105.59   27.80 
  -7  -4   0   64.59   32.90 
   7   4   0   62.09   29.70 
  -7  -4   0   40.10   27.40 
   7   4   0   69.89   27.20 
   7   4   0   65.69   31.00 
   7   4   0   85.69   26.90 
   7   4   0   41.70   29.70 
   7   4   0   56.39   30.20 
   4  -7   0   74.29   33.50 
  -4   7   0    7.80   23.60 
   7   4   0   51.59   27.60 
  -4   7   0   77.79   33.80 
  -7  -4   0  111.49   35.40 
   4  -7   0   77.59   32.70 
  -7  -4   0   84.39   42.60 
   4  -7   0   69.49   29.40 
  -4   7   0   40.60   22.60 
   7   4   0   25.70   28.20 
   7   4   0  127.69   49.99 
   7   4   0   74.79   39.90 
  -4   7   0   87.59   41.10 
  -7  -4   0   65.19   23.00 
  -4   7   0   49.90   23.30 
   4  -7   0   62.89   29.30 
  -4   7   0   54.59   28.60 
  -7  -4   0  112.59   30.00 
   4  -7   0   84.59   48.60 
   7   4   0   47.90   25.30 
  -7  -4   0    6.50   27.10 
   4  -7   0   42.30   24.10 
   7   4   0   50.39   29.00 
   4  -7   0   86.29   38.80 
  -4   7   0   32.90   22.80 
   4  -7   0   54.49   27.00 
  -7  -4   0  -11.30   27.40 
  -7  -4   0   84.99   37.40 
  -4   7   0   25.40   29.00 
   7   4   0   58.39   29.20 
  -7  -4   0   53.79   24.00 
   4  -7   0   58.89   39.70 
   7   4   0   43.40   29.30 
   7   3   0  828.02   98.29 
   3  -7   0  824.62   90.59 
   3  -7   0  871.41  119.89 
   3  -7   0  858.81   73.29 
  -7  -3   0  849.22   80.89 
  -7  -3   0  717.13   88.89 
  -3   7   0  777.42   78.59 
  -3   7   0  729.03   85.79 
   7   3   0  903.91   99.89 
  -3   7   0  794.62  102.99 
   7   3   0  981.60  106.89 
  -7  -3   0  745.03   78.79 
   3  -7   0  902.71   72.19 
   7   3   0  802.72   88.19 
  -7  -3   0 1046.80   87.29 
  -7  -3   0  943.31  115.99 
  -7  -3   0  762.02  111.69 
   7   3   0  766.62   91.19 
   3  -7   0  780.72   92.09 
   3  -7   0  803.72   86.19 
   3  -7   0  969.10  102.19 
   3  -7   0  618.64   86.19 
   3  -7   0  856.51  105.59 
  -3   7   0  811.82   90.19 
  -3   7   0  752.12   98.39 
  -7  -3   0  758.82  103.79 
   3  -7   0  797.72  109.89 
  -7  -3   0  982.30  102.39 
   3  -7   0  846.42   97.69 
   7   3   0 1163.18  131.99 
   7   3   0  884.11  105.29 
   7   3   0  837.22  101.49 
   7   3   0  920.31  115.69 
  -7  -3   0  910.21   99.29 
   7   3   0  780.62   88.19 
  -3   7   0  835.82   90.19 
  -7  -3   0 1040.50  117.29 
   3  -7   0  842.12   93.19 
  -7  -3   0  735.03   95.79 
   7   3   0  852.91   95.49 
  -7  -3   0 1046.20  108.69 
   7   3   0  997.10  120.79 
   7   3   0  746.23   95.59 
   3  -7   0  702.73   94.39 
   3  -7   0  624.94   79.09 
  -7  -3   0  785.52   97.39 
   3  -7   0  635.74   82.79 
   7   3   0  722.43   96.39 
  -7  -3   0  883.61  108.69 
   7   3   0  782.22   69.99 
  -7  -3   0  797.52   84.89 
  -7  -3   0  868.81  107.19 
  -7  -3   0  770.72   72.69 
   7   3   0  993.80   78.99 
  -7  -3   0  863.11   74.49 
   7   3   0  899.21  100.29 
  -3   7   0  811.82   97.29 
  -7  -3   0 1034.90  123.19 
   7   3   0  948.01   77.09 
  -3   7   0  933.01  104.79 
   3  -7   0  761.02   91.79 
  -3   7   0  549.54   99.19 
   3  -7   0  625.94   91.99 
  -2   7   0   66.09   23.00 
  -2   7   0  153.98   43.00 
  -2   7   0  138.69   33.50 
  -2   7   0   39.30   27.50 
   2  -7   0  107.89   36.30 
   2  -7   0   95.29   19.90 
  -2   7   0   69.29   25.20 
   7   2   0  136.29   31.00 
   7   2   0  139.39   34.40 
   7   2   0  114.99   36.10 
   2  -7   0  149.79   36.80 
  -2   7   0  143.29   28.30 
   2  -7   0  115.19   30.70 
  -7  -2   0  105.19   30.30 
   7   2   0  119.69   34.40 
  -2   7   0  128.29   37.40 
   7   2   0  130.69   46.60 
  -7  -2   0  183.48   38.00 
  -7  -2   0   81.59   34.40 
  -7  -2   0   84.29   26.90 
  -7  -2   0  131.09   43.10 
   7   2   0   59.89   28.30 
   7   2   0  105.59   30.00 
  -7  -2   0  100.29   42.30 
  -2   7   0   96.89   29.80 
   2  -7   0  143.39   38.00 
   2  -7   0  174.68   47.80 
  -7  -2   0  162.28   40.50 
   2  -7   0  103.19   36.20 
   2  -7   0  164.28   31.20 
   7   2   0  166.68   44.60 
  -7  -2   0  123.79   41.10 
  -2   7   0  137.59   38.00 
   2  -7   0  168.28   35.50 
   2  -7   0  111.59   34.70 
   2  -7   0  151.98   37.90 
   7   2   0  112.59   36.60 
   7   2   0  127.39   42.80 
  -7  -2   0  137.39   32.10 
   2  -7   0  133.49   43.60 
  -7  -2   0  100.49   40.40 
  -7  -2   0  139.59   31.90 
   7   2   0  209.68   54.69 
  -7  -2   0  125.69   38.60 
   2  -7   0  128.89   23.80 
   7   2   0   95.49   28.70 
  -7  -2   0   77.39   22.00 
  -2   7   0  126.39   33.10 
   2  -7   0   65.89   27.30 
  -7  -2   0   66.19   29.90 
   7   2   0   99.49   36.80 
   7   2   0  112.69   35.00 
   7   2   0  116.39   38.60 
   7   2   0  167.38   29.50 
   2  -7   0  105.49   20.60 
  -2   7   0  135.19   47.50 
   2  -7   0  162.88   31.40 
  -7  -2   0  162.48   37.80 
  -7  -2   0  101.79   39.00 
   2  -7   0  121.79   32.10 
   2  -7   0  108.49   30.70 
   2  -7   0   65.59   27.70 
  -7  -2   0  149.09   37.10 
  -7  -2   0   57.99   28.40 
   7   2   0  178.38   42.70 
   2  -7   0  104.79   28.40 
  -2   7   0  100.49   22.80 
   2  -7   0  110.29   36.40 
   7   1   0 1384.06  105.29 
   1  -7   0 1372.56  118.69 
   1  -7   0 1226.08  105.99 
  -7  -1   0 1312.67  139.29 
  -7  -1   0 1278.47  108.79 
  -7  -1   0 1089.09  100.19 
   1  -7   0 1172.88   94.39 
  -7  -1   0 1450.25  118.49 
  -1   7   0 1222.28   98.39 
  -1   7   0 1257.57  115.29 
   7   1   0 1352.06   92.19 
   1  -7   0 1146.59  103.89 
  -1   7   0 1288.87  108.39 
   1  -7   0 1329.77  111.39 
   1  -7   0 1206.78  134.59 
  -7  -1   0 1305.47  135.09 
  -1   7   0 1288.07  100.39 
  -1   7   0 1331.67  101.39 
   7   1   0 1673.43  175.08 
   7   1   0 1396.96  122.99 
  -7  -1   0 1444.16  109.19 
   7   1   0 1313.47  135.99 
  -7  -1   0 1237.38  141.59 
  -1   7   0 1203.98  110.39 
   1  -7   0 1239.28  125.69 
   1  -7   0 1211.98  134.19 
   7   1   0 1442.06  123.29 
  -1   7   0 1309.77  134.69 
   1  -7   0 1259.37   96.19 
  -1   7   0 1163.48  103.59 
   1  -7   0 1083.79   98.49 
   1  -7   0 1273.87   96.29 
   7   1   0 1257.97  105.19 
  -1   7   0 1167.18  106.89 
   1  -7   0 1264.37  110.49 
  -7  -1   0 1364.06  106.39 
   7   1   0 1178.58   98.09 
  -1   7   0 1361.66  106.29 
  -1   7   0 1389.06   98.59 
   7   1   0 1417.76  113.59 
   7   1   0 1366.96  123.59 
   7   1   0 1366.76  112.79 
   1  -7   0 1249.47  100.19 
   1  -7   0 1105.29  124.49 
   7   1   0 1330.97  109.19 
  -7  -1   0 1295.87  106.39 
  -7  -1   0 1388.96  145.69 
  -1   7   0 1438.26   99.89 
  -7  -1   0 1333.27  138.69 
  -1   7   0 1196.48  141.19 
  -7  -1   0 1392.66  118.99 
  -1   7   0 1282.37   95.59 
  -7  -1   0 1313.87  105.29 
   1  -7   0 1067.89  100.99 
   1  -7   0 1319.67   98.09 
   7   1   0 1158.58  108.69 
   1  -7   0 1384.16  106.19 
   1  -7   0 1083.99  126.69 
  -7  -1   0 1343.27  111.89 
   1  -7   0 1280.37  108.59 
   7   1   0 1376.56  106.99 
   7   1   0 1543.65  129.69 
   7   1   0 1394.16  113.69 
   7   1   0 1106.39  106.99 
   1  -7   0 1226.88  127.49 
  -7  -1   0 1213.68  115.69 
   1  -7   0 1118.39   97.09 
   7   1   0 1279.97  104.89 
  -1   7   0 1381.96  103.49 
  -7  -1   0 1329.77  103.99 
  -7  -1   0 1428.86  103.89 
  -7  -1   0 1315.47  112.29 
  -7  -1   0 1343.57  104.29 
   1  -7   0 1246.98   94.99 
   7   1   0 1356.56  111.19 
  -7   0   0   -3.50   15.10 
   0   7   0   10.70   17.40 
   7   0   0   31.90   20.80 
   7   0   0   20.50   23.50 
   7   0   0   -7.50   11.40 
  -7   0   0    4.40   19.90 
  -7   0   0   -6.70   11.50 
   0  -7   0   11.30   15.30 
   0  -7   0   -3.00   12.80 
   0  -7   0   20.70   20.30 
  -7   0   0   -3.50   15.40 
  -7   0   0   -6.40   18.40 
  -7   0   0    7.80   13.10 
   0  -7   0    8.70   10.90 
   0  -7   0   24.30   21.90 
   0  -7   0   -0.60   12.10 
   0   7   0   -3.10   17.20 
   0   7   0    6.70   19.10 
   0   7   0   -8.10    9.50 
   7   0   0   21.30   29.90 
   7   0   0    4.70   25.60 
   7   0   0   16.30   20.70 
   7   0   0  -14.20   17.00 
   0   7   0   22.70   18.90 
  -7   0   0   -4.80   12.30 
   0  -7   0    0.60   12.60 
  -7   0   0   -3.50   18.70 
   7   0   0   12.80   16.40 
  -7   0   0  -12.50   17.50 
   7   0   0   -7.10   11.40 
  -7   0   0   57.79   26.00 
   0  -7   0    0.30   16.60 
   0   7   0  -10.10   16.10 
   7   0   0  -13.90   16.00 
   0   7   0   -6.00    9.40 
  -7   0   0   -2.70   18.00 
   7   0   0   -5.30   13.60 
   0  -7   0   33.50   19.10 
   0   7   0    2.50   14.50 
   0   7   0  -29.00   18.80 
  -7   0   0   10.30   21.70 
   0  -7   0  -22.30   11.10 
  -7   0   0  -17.20   21.60 
   0  -7   0   -1.90   12.90 
   0  -7   0    7.20   18.50 
   0  -7   0   18.10   17.40 
   7   0   0   -5.40    7.90 
   0   7   0   13.80   18.50 
   0   7   0   -2.90   11.70 
   0   7   0   11.90   13.80 
   0   7   0   -8.90   17.20 
  -7   0   0   -5.40   15.50 
   0   7   0   -8.20    7.20 
   7   0   0  -12.90   12.30 
   0  -7   0  -21.80    9.70 
   0  -7   0    3.80   16.10 
   7   0   0  -27.20   19.10 
   7   0   0   12.60   17.00 
   7   0   0   -1.00   14.70 
  -7   0   0    2.00   14.80 
   7   0   0   10.40   14.30 
   0  -7   0   10.50   15.10 
  -7   0   0   10.00   15.00 
   0  -7   0   -8.20   17.90 
   7   0   0   16.40   18.50 
   7   0   0   -4.10   13.50 
   0  -7   0  -18.00   13.60 
   0  -7   0   -9.50   12.90 
   0  -7   0   12.00   16.40 
  -7   0   0    1.30   18.20 
   0   7   0   43.50   19.20 
   7   0   0   -2.00   13.70 
   0  -7   0   -6.00   19.90 
   0  -7   0   -5.20   13.70 
   7   0   0  127.39   37.10 
   0  -7   0   -2.60   12.00 
   0   7   0   52.59   22.30 
  -7   1   0 1236.88  110.19 
   7  -1   0 1128.89  131.19 
  -1  -7   0 1130.29   91.69 
  -1  -7   0 1224.08   92.49 
  -7   1   0 1502.65  115.19 
  -7   1   0 1187.88  110.59 
   1   7   0 1230.38  105.99 
  -1  -7   0 1331.57  117.89 
  -7   1   0 1237.18  138.29 
  -7   1   0 1567.04  118.59 
  -7   1   0 1256.37  128.79 
  -1  -7   0 1358.26  113.89 
  -7   1   0 1291.17   95.49 
  -1  -7   0 1308.77  110.69 
   7  -1   0 1243.08   99.49 
  -7   1   0 1396.66   99.39 
   7  -1   0 1308.87  162.28 
   7  -1   0 1210.48  101.39 
  -1  -7   0 1343.57  114.09 
   1   7   0 1200.38  136.09 
   7  -1   0 1323.47  100.79 
   7  -1   0 1305.07   99.69 
  -1  -7   0 1099.49  128.69 
   7  -1   0 1304.17  107.39 
  -1  -7   0 1289.17  113.49 
   1   7   0 1288.67  106.09 
  -7   1   0 1322.97  109.69 
  -1  -7   0 1291.97  102.19 
  -1  -7   0 1144.99  133.49 
   1   7   0 1188.58  108.29 
  -1  -7   0 1207.18  103.19 
   1   7   0 1417.16  121.09 
   1   7   0 1298.67   91.49 
   7  -1   0 1350.86  109.49 
   7  -1   0 1102.79  106.09 
   7  -1   0 1243.48  128.29 
  -7   1   0 1322.17  100.59 
   7  -1   0 1369.66  107.29 
  -7   1   0 1186.88   94.99 
   1   7   0 1245.18   98.79 
   1   7   0 1209.38   99.89 
   1   7   0 1317.17  112.19 
  -1  -7   0 1319.67  103.99 
  -1  -7   0 1209.68  108.39 
   1   7   0 1291.07  104.79 
  -7   1   0 1391.06  108.39 
  -1  -7   0 1226.08   93.69 
  -1  -7   0 1300.27  113.69 
  -1  -7   0 1175.48  108.69 
  -7   1   0 1344.27  108.29 
   1   7   0 1160.38  123.99 
   1   7   0 1301.57  115.49 
   7  -1   0 1204.08  102.19 
  -1  -7   0 1251.57   93.89 
   1   7   0 1386.06  108.79 
  -1  -7   0 1331.07  108.79 
   7  -1   0 1232.78   97.79 
   7  -1   0 1342.97  106.39 
   7  -1   0 1289.47  112.49 
  -7   1   0 1460.05  109.29 
   7  -1   0 1099.19  105.79 
   7  -1   0 1288.57  107.69 
  -1  -7   0 1193.48  105.09 
  -1  -7   0 1279.77  108.99 
   1   7   0 1301.07  111.59 
   1   7   0 1409.56  118.29 
  -1  -7   0 1301.37  109.29 
   1   7   0 1240.58   90.99 
  -7   1   0 1091.89  127.79 
   7  -1   0 1467.15  153.48 
   1   7   0 1309.77   93.19 
  -7   1   0 1454.85  145.99 
  -7   1   0 1286.77  104.49 
  -1  -7   0 1187.38   92.09 
   7  -1   0 1396.86  143.19 
   7  -1   0 1513.15  152.78 
  -7   1   0 1337.07  113.49 
   7  -1   0 1358.96  109.89 
  -2  -7   0  121.59   22.00 
   7  -2   0   88.49   31.50 
  -2  -7   0  130.59   36.80 
  -2  -7   0  171.68   45.50 
  -2  -7   0  117.89   33.70 
  -2  -7   0  149.49   23.70 
   7  -2   0  128.19   33.00 
  -7   2   0  109.49   21.60 
  -2  -7   0  108.29   37.30 
  -7   2   0  119.79   37.60 
  -2  -7   0  166.88   44.50 
  -7   2   0  110.79   40.90 
   2   7   0  141.39   37.60 
   7  -2   0  148.29   54.09 
   2   7   0  119.69   37.90 
  -2  -7   0  113.99   39.10 
  -2  -7   0  122.29   35.40 
  -7   2   0   90.79   35.80 
  -7   2   0  160.88   39.70 
   2   7   0   94.39   30.60 
   7  -2   0   54.49   30.50 
   7  -2   0  127.69   40.60 
   7  -2   0   88.49   25.80 
   7  -2   0   87.59   30.30 
   7  -2   0  158.38   30.10 
  -7   2   0  123.89   30.00 
   2   7   0  143.79   40.20 
   2   7   0   97.49   30.10 
   7  -2   0  132.09   34.30 
   2   7   0  145.59   35.70 
  -7   2   0  107.49   38.30 
  -2  -7   0   55.99   26.70 
   7  -2   0  134.79   28.90 
  -2  -7   0  102.59   31.80 
  -2  -7   0  120.49   36.80 
  -2  -7   0  208.38   46.30 
  -7   2   0   68.99   26.70 
  -2  -7   0  171.68   47.90 
  -2  -7   0  127.09   25.30 
  -2  -7   0  117.39   33.90 
   2   7   0   69.49   29.30 
   2   7   0  100.19   31.30 
   7  -2   0  106.29   43.30 
   7  -2   0  100.79   42.40 
  -2  -7   0  128.59   32.70 
  -7   2   0  149.09   38.60 
  -7   2   0   59.09   30.80 
  -2  -7   0  104.39   33.60 
   7  -2   0  132.89   27.00 
   7  -2   0  108.19   31.20 
   7  -2   0  117.29   34.60 
  -7   2   0  100.99   33.60 
  -7   2   0  196.48   38.80 
   2   7   0  177.28   36.00 
   2   7   0  181.98   48.20 
  -2  -7   0   30.80   28.20 
   7  -2   0  152.28   27.30 
   7  -2   0  109.29   34.00 
   7  -2   0  124.39   46.30 
   7  -2   0  104.89   33.70 
  -2  -7   0  155.98   42.80 
   2   7   0  144.59   43.60 
  -7   2   0   68.39   24.60 
  -7   2   0  139.09   25.50 
   2   7   0  151.68   42.60 
   7  -2   0  120.39   27.70 
   7  -2   0  113.49   34.70 
   7  -3   0  755.12  111.49 
   7  -3   0  744.73  101.69 
  -3  -7   0  903.91  109.39 
   3   7   0  795.92   92.19 
  -7   3   0  847.32   98.49 
  -7   3   0  813.32   89.29 
  -3  -7   0  821.62   92.69 
   7  -3   0  733.93  110.59 
  -7   3   0  830.22   93.59 
  -7   3   0  835.22   95.19 
  -7   3   0 1044.20  122.89 
  -3  -7   0  840.02   94.99 
   3   7   0 1009.60  102.19 
   7  -3   0  878.21   77.09 
  -7   3   0  870.31  107.99 
  -7   3   0 1139.59  123.89 
   7  -3   0  894.91   97.89 
  -3  -7   0  812.02   99.19 
   3   7   0  959.00   91.29 
  -7   3   0  798.02   98.09 
  -3  -7   0  920.61  103.79 
   7  -3   0  794.22   86.99 
  -3  -7   0  603.04   98.59 
  -7   3   0  736.53   83.39 
  -3  -7   0 1021.50  114.99 
   7  -3   0  744.63   85.19 
   3   7   0  978.70  108.49 
   7  -3   0  829.42   97.99 
   3   7   0 1058.79  113.29 
   3   7   0  793.22   95.29 
   3   7   0  835.82   99.19 
  -3  -7   0  828.22   94.69 
   7  -3   0  894.21  125.49 
  -7   3   0  645.24   81.09 
   7  -3   0  729.13  101.39 
  -7   3   0  720.23   92.59 
   7  -3   0  989.20   97.99 
   7  -3   0  878.41  102.69 
  -3  -7   0  928.31  102.09 
   7  -3   0  856.11   97.69 
   3   7   0  839.02   92.89 
   3   7   0  860.21  102.09 
  -7   3   0  752.92   80.59 
  -3  -7   0  904.91  106.39 
  -3  -7   0  911.21  104.99 
   7  -3   0  861.21   95.59 
   7  -3   0  730.13  113.79 
  -3  -7   0  923.21  110.19 
   3   7   0 1002.00  102.19 
   3   7   0  734.13  102.69 
  -3  -7   0  943.61  103.59 
   3   7   0  872.31  101.29 
  -3  -7   0  749.23   99.09 
  -3  -7   0 1048.70  106.69 
   3   7   0  649.93   90.99 
  -3  -7   0  795.12  104.29 
   7  -3   0  807.12   93.59 
   3   7   0 1085.19  119.19 
   3   7   0  798.42  100.29 
  -4  -7   0   28.80   28.70 
  -4  -7   0   95.89   35.70 
   4   7   0   81.09   37.40 
  -7   4   0   24.10   24.50 
  -7   4   0   31.70   21.40 
   7  -4   0    3.50   26.00 
  -4  -7   0   47.90   25.90 
  -4  -7   0   40.70   22.20 
   7  -4   0  112.79   40.10 
   7  -4   0   48.80   31.50 
   7  -4   0   38.90   24.50 
  -7   4   0   41.20   28.70 
  -4  -7   0   61.59   31.80 
   7  -4   0   73.99   26.10 
   7  -4   0   48.70   23.70 
   7  -4   0   61.69   29.50 
   4   7   0  -17.70   19.70 
  -4  -7   0   90.29   33.80 
   7  -4   0   61.99   24.50 
  -7   4   0   78.59   26.90 
  -4  -7   0  124.99   42.10 
   4   7   0   16.00   21.90 
  -4  -7   0   69.29   32.70 
  -4  -7   0   72.69   38.20 
   4   7   0   39.60   25.50 
   4   7   0   71.79   33.50 
  -4  -7   0   48.40   26.50 
  -7   4   0   58.09   24.40 
  -7   4   0   12.30   30.10 
  -4  -7   0   57.09   25.00 
   4   7   0   88.19   36.40 
  -4  -7   0   63.39   27.60 
  -7   4   0   66.39   27.20 
  -4  -7   0   73.99   38.60 
   4   7   0   41.70   22.50 
  -4  -7   0   36.10   26.60 
   7  -4   0   77.99   32.30 
   7  -4   0   98.89   45.40 
   7  -4   0   19.10   30.90 
   4   7   0   45.60   24.50 
   4   7   0   63.69   33.10 
   4   7   0   63.09   36.40 
   4   7   0   73.89   31.40 
  -4  -7   0   55.39   38.20 
  -7   4   0   27.20   26.50 
   4   7   0   15.30   21.30 
  -7   4   0   33.20   23.60 
   4   7   0   38.00   27.60 
   7  -4   0   18.60   22.70 
  -4  -7   0   54.59   31.40 
  -4  -7   0   55.49   33.50 
  -7   4   0   89.49   40.00 
   4   7   0   47.80   29.30 
   7  -4   0   48.40   28.40 
  -4  -7   0   57.09   32.90 
   7  -4   0   50.09   25.50 
  -7   4   0   75.79   32.20 
  -7   4   0   43.40   19.50 
   7  -4   0   31.50   41.90 
   5   7   0   44.80   31.90 
  -5  -7   0  102.99   37.60 
  -5  -7   0  106.69   39.90 
  -5  -7   0  112.39   30.40 
   7  -5   0  128.99   55.29 
  -5  -7   0  101.69   44.60 
  -7   5   0   45.80   39.50 
   7  -5   0   65.09   28.80 
   7  -5   0   64.29   39.70 
  -5  -7   0   31.80   33.20 
  -5  -7   0  118.99   39.00 
  -5  -7   0   27.50   30.20 
   7  -5   0   57.09   28.10 
   7  -5   0   66.79   35.80 
   7  -5   0   59.49   26.00 
  -5  -7   0  100.09   36.10 
   7  -5   0   81.19   48.50 
   5   7   0   72.39   35.60 
   5   7   0  120.69   47.00 
  -7   5   0   79.59   32.00 
  -7   5   0   68.49   41.80 
   7  -5   0   26.80   22.00 
  -7   5   0  108.59   27.40 
   7  -5   0   94.19   43.00 
   5   7   0  107.29   39.40 
   7  -5   0  144.09   39.00 
   5   7   0   84.09   34.90 
   5   7   0   96.89   40.00 
   7  -5   0  126.39   55.19 
   7  -5   0  132.39   41.00 
  -7   5   0  141.29   40.20 
  -7   5   0   57.29   24.30 
  -7   5   0  123.39   39.30 
  -7   5   0  119.19   31.80 
   7  -5   0   66.89   26.80 
  -5  -7   0   61.19   33.70 
  -5  -7   0  109.89   40.40 
   5   7   0   64.19   45.50 
   5   7   0   54.39   28.80 
  -5  -7   0   59.19   30.50 
  -5  -7   0   63.19   41.60 
   5   7   0    2.50   24.40 
  -5  -7   0  190.78   50.19 
   5   7   0   61.99   32.90 
  -7   5   0   75.89   36.20 
   5   7   0  150.18   43.10 
  -7   5   0  112.19   34.70 
   5   7   0   75.69   34.20 
  -5  -7   0   95.69   45.10 
  -7   5   0  102.79   31.40 
   7  -5   0  121.89   41.90 
   5   7   0   75.59   28.50 
   7  -5   0   36.20   27.80 
  -5  -7   0   83.49   32.00 
  -5  -7   0   77.69   31.70 
  -5  -7   0   -2.80   27.30 
   7  -5   0   82.19   35.70 
  -5  -7   0   71.39   32.20 
   5   7   0   88.29   34.80 
  -7   5   0   26.40   26.40 
   7  -6   0  353.06   69.49 
   7  -6   0  477.25   81.89 
  -7   6   0  570.64  102.69 
   7  -6   0  601.64   79.59 
   6   7   0  595.44   75.09 
   7  -6   0  301.47   82.39 
  -6  -7   0  632.14   90.59 
   6   7   0  657.83  105.49 
   6   7   0  553.34   80.19 
  -6  -7   0  364.56   82.29 
  -6  -7   0  579.34   97.89 
  -6  -7   0  516.55   88.89 
   7  -6   0  475.35   75.19 
   7  -6   0  572.54   73.59 
  -7   6   0  428.76   73.89 
  -6  -7   0  421.46   71.49 
  -7   6   0  483.25   78.29 
   7  -6   0  639.04   82.49 
  -7   6   0  543.05   73.09 
  -7   6   0  493.35   61.99 
   7  -6   0  391.06   79.29 
   6   7   0  512.85   80.19 
   6   7   0  534.55   87.39 
   6   7   0  790.12   95.59 
   7  -6   0  396.56   75.49 
   6   7   0  490.75   77.69 
   7  -6   0  648.44   88.59 
   6   7   0  415.86   71.09 
  -6  -7   0  493.45   69.89 
   7  -6   0  504.45   71.19 
  -6  -7   0  511.85   81.79 
   6   7   0  488.45   76.89 
  -7   6   0  459.95   88.89 
  -7   6   0  682.03   72.59 
   6   7   0  404.56   71.39 
  -7   6   0  620.94   76.29 
   7  -6   0  518.25   72.89 
  -7   6   0  596.04   80.99 
  -6  -7   0  383.36   78.09 
  -6  -7   0  566.94   95.19 
  -6  -7   0  589.34   76.29 
  -6  -7   0  602.64   87.59 
  -6  -7   0  575.84   87.89 
   6   7   0  591.54  100.09 
  -7   6   0  588.14   84.79 
   7  -6   0  435.56   89.39 
   6   7   0  584.44   87.39 
   7  -6   0  577.34   98.69 
  -6  -7   0  487.05   90.29 
  -6  -7   0  543.65   85.59 
   6   7   0  674.33   86.39 
   6   7   0  552.94   77.79 
  -7   6   0  605.04   80.79 
  -7   6   0  529.85   81.69 
  -6  -7   0  517.05   86.59 
   6   7   0  473.95   91.59 
   6   7   0  533.95   68.69 
  -6  -7   0  343.97   70.69 
  -6  -7   0  522.35   92.99 
   7  -6   0  625.74   96.89 
   6   7   0  430.06   75.89 
  -7  -7   0 2924.01  226.68 
  -7   7   0 2800.92  231.38 
  -7  -7   0 3170.68  229.58 
  -7  -7   0 2985.60  252.17 
   7   7   0 3153.18  235.98 
   7   7   0 3120.49  221.68 
   7   7   0 3345.97  258.97 
  -7  -7   0 3182.08  250.67 
   7  -7   0 2971.40  251.77 
  -7   7   0 3496.35  271.37 
  -7  -7   0 3264.27  242.58 
   7   7   0 3511.45  239.88 
  -7  -7   0 3061.29  246.48 
  -7   7   0 2925.21  233.98 
  -7  -7   0 2954.10  225.78 
  -7  -7   0 3236.98  257.47 
   7   7   0 2973.90  241.08 
  -7   7   0 2930.01  225.48 
   7  -7   0 2901.51  224.58 
   7  -7   0 3180.78  231.28 
  -7   7   0 2867.41  220.88 
   7   7   0 3259.97  231.88 
   7  -7   0 3453.55  251.47 
  -7   7   0 3482.55  262.67 
  -7  -7   0 3009.80  248.88 
   7   7   0 3298.97  245.68 
  -7  -7   0 2800.52  234.68 
   7  -7   0 2777.02  261.97 
  -7  -7   0 3046.00  243.78 
  -7  -7   0 3511.75  247.48 
  -7   7   0 3409.26  235.88 
   7  -7   0 2775.82  239.78 
   7  -7   0 2984.50  237.68 
  -7  -7   0 3481.75  255.87 
   7  -7   0 2890.71  227.98 
  -7   7   0 2936.31  238.18 
   7   7   0 3430.16  259.67 
   7   7   0 3207.68  227.58 
   7   7   0 3713.53  270.47 
   7   7   0 3490.05  243.38 
   7   7   0 3227.98  237.38 
   7  -7   0 2966.20  256.27 
  -7  -7   0 3129.69  252.37 
   7  -7   0 2741.53  218.98 
   7  -7   0 2609.44  228.88 
   7  -7   0 3352.26  233.38 
   8   7   0  125.49   48.90 
  -8  -7   0   79.39   38.40 
  -7   8   0   42.00   28.00 
   7  -8   0   49.40   43.70 
   7  -8   0    5.00   31.60 
   7  -8   0   77.59   42.90 
  -8  -7   0  161.28   59.79 
   7  -8   0   79.59   49.10 
  -7   8   0   43.40   37.70 
  -7   8   0   61.29   44.00 
  -8  -7   0   72.59   47.30 
  -8  -7   0   65.49   44.80 
   8   7   0   22.20   28.80 
  -8  -7   0   -2.90   34.50 
   7  -8   0   51.79   37.50 
  -7   8   0   56.39   34.60 
  -7   8   0   23.00   45.70 
   8   7   0    3.20   26.50 
  -8  -7   0   26.60   41.10 
  -8  -7   0   19.20   36.30 
   7  -8   0   33.00   51.19 
   7  -8   0   62.39   34.20 
   8   7   0   11.80   38.90 
   7  -8   0  111.69   54.89 
   8   7   0   89.19   58.19 
   8   7   0   59.79   37.10 
  -8  -7   0   57.39   45.00 
   8   7   0   51.49   48.30 
  -7   8   0   71.79   48.50 
  -8  -7   0   48.50   45.40 
   8   7   0   33.00   33.80 
   7  -8   0   63.99   35.00 
  -7   8   0   41.90   35.70 
  -8  -7   0   61.29   37.30 
   8   7   0   80.39   38.80 
   8   7   0   51.59   32.30 
  -7   8   0   39.30   35.20 
   7  -8   0   52.89   30.30 
   7  -8   0   40.90   33.60 
   7  -8   0   58.09   43.20 
  -8  -7   0  -19.50   29.00 
   8   7   0   36.10   33.50 
   8   7   0    9.50   30.80 
  -8  -7   0   29.30   31.80 
  -8  -7   0   28.00   47.60 
  -8  -7   0   28.80   41.00 
  -6   8   0  488.45  104.69 
   6  -8   0  497.85   91.69 
  -6   8   0  441.26   79.89 
  -8  -6   0  528.85   98.79 
  -8  -6   0  612.04   97.49 
   6  -8   0  455.95   98.19 
   8   6   0  616.84   90.69 
   8   6   0  575.34  100.09 
  -8  -6   0  513.35   94.49 
   6  -8   0  483.05   87.79 
   8   6   0  432.36   78.59 
   6  -8   0  400.16   79.39 
   6  -8   0  532.15   86.29 
  -8  -6   0  417.76   78.69 
  -8  -6   0  290.47   65.49 
  -6   8   0  447.36   92.19 
   6  -8   0  354.36   65.99 
   8   6   0  542.05   87.59 
  -8  -6   0  585.64   99.39 
  -6   8   0  427.06   68.69 
  -8  -6   0  704.23  110.49 
  -8  -6   0  530.15   87.69 
   8   6   0  493.65   82.39 
   6  -8   0  361.46   72.29 
   8   6   0  422.96   73.69 
  -6   8   0  586.44   82.89 
  -8  -6   0  513.55   80.69 
  -8  -6   0  461.85   85.59 
   8   6   0  631.54   79.29 
   6  -8   0  515.65   82.29 
  -8  -6   0  378.56   79.49 
   8   6   0  476.85   93.29 
   8   6   0  571.94  100.99 
  -6   8   0  418.76   79.09 
  -6   8   0  422.36   74.79 
   6  -8   0  533.85   79.39 
   6  -8   0  299.67   87.99 
  -6   8   0  525.85   70.79 
   8   6   0  428.66   81.79 
  -8  -6   0  443.36   90.49 
   6  -8   0  575.94   80.89 
  -8  -6   0  385.26   80.79 
   8   6   0  534.65   88.29 
  -8  -6   0  465.75   71.99 
   8   6   0  526.95   76.19 
  -8  -6   0  675.23  101.69 
  -8  -5   0  123.19   46.80 
   5  -8   0  116.49   47.00 
  -5   8   0  223.38   48.40 
   5  -8   0  245.18   65.39 
   8   5   0  323.77   64.39 
   5  -8   0  229.08   48.00 
  -5   8   0  168.98   57.59 
   8   5   0  243.28   68.29 
  -8  -5   0  180.68   53.59 
   8   5   0  181.48   46.70 
  -5   8   0  267.17   58.69 
   5  -8   0  140.59   45.50 
  -8  -5   0  211.18   57.29 
  -8  -5   0  211.88   56.09 
  -5   8   0  235.18   52.89 
  -5   8   0  228.48   43.10 
   8   5   0  251.57   58.09 
  -8  -5   0  350.06   77.89 
  -8  -5   0  261.07   67.59 
  -8  -5   0  195.38   58.19 
   8   5   0  251.27   59.99 
   8   5   0  202.38   50.59 
   8   5   0  194.88   43.80 
  -8  -5   0  179.98   56.19 
   8   5   0  140.89   50.59 
  -5   8   0  229.28   58.99 
  -5   8   0  225.28   70.99 
   5  -8   0  133.59   44.70 
   8   5   0  172.48   60.09 
  -8  -5   0  141.79   45.50 
  -8  -5   0  235.28   48.80 
   5  -8   0   76.89   49.99 
  -8  -5   0   94.59   40.00 
  -5   8   0  264.37   62.19 
  -8  -5   0  292.67   73.29 
   5  -8   0  253.57   52.49 
   5  -8   0  152.48   58.09 
   5  -8   0  157.68   44.70 
   5  -8   0  178.88   49.99 
  -8  -5   0  330.07   69.79 
   5  -8   0  316.77   60.59 
   5  -8   0  167.28   41.10 
  -8  -5   0  272.57   62.89 
  -8  -5   0  203.68   53.79 
   8   5   0  239.48   70.09 
  -8  -5   0  245.18   62.09 
   8   5   0  306.37   52.39 
   5  -8   0  238.48   54.99 
  -4   8   0 2120.29  206.08 
  -8  -4   0 2448.96  200.98 
   8   4   0 2750.42  191.18 
  -8  -4   0 2622.44  207.28 
   4  -8   0 2251.37  186.68 
   8   4   0 2502.45  192.38 
  -4   8   0 2285.37  169.58 
  -8  -4   0 2634.24  197.98 
   4  -8   0 2412.36  191.58 
   8   4   0 2495.35  195.98 
  -4   8   0 2273.77  178.58 
  -8  -4   0 2252.37  183.98 
   4  -8   0 2221.38  183.18 
  -8  -4   0 2401.06  192.18 
   8   4   0 2469.05  205.58 
  -8  -4   0 2571.94  196.28 
  -8  -4   0 2279.87  194.68 
   4  -8   0 2579.34  184.38 
   8   4   0 2559.14  172.38 
   8   4   0 2267.87  182.98 
   4  -8   0 2539.75  176.08 
   8   4   0 2947.31  218.38 
   8   4   0 2312.07  183.88 
   4  -8   0 2177.48  176.48 
   4  -8   0 2257.37  189.08 
  -4   8   0 2569.54  188.28 
   8   4   0 2457.65  208.18 
  -4   8   0 2024.90  173.78 
   4  -8   0 2300.97  177.38 
   4  -8   0 2192.78  181.08 
  -4   8   0 2313.37  197.48 
   8   4   0 2298.07  189.98 
  -4   8   0 2167.68  188.58 
   4  -8   0 2281.97  184.48 
  -8  -4   0 2676.53  210.68 
  -8  -4   0 2640.24  203.28 
  -8  -4   0 2131.89  182.38 
   4  -8   0 2338.87  197.18 
   4  -8   0 2537.75  186.68 
  -8  -4   0 2243.58  198.68 
  -4   8   0 2398.76  195.68 
   8   4   0 2278.77  176.88 
  -4   8   0 2202.68  185.58 
  -8  -4   0 2277.07  191.38 
  -8  -4   0 2184.28  185.98 
   4  -8   0 2334.97  202.98 
   8   4   0 2620.84  195.08 
   8   4   0 2795.02  196.98 
   4  -8   0 2342.47  188.98 
   3  -8   0  194.78   48.20 
  -8  -3   0  254.37   53.99 
  -3   8   0  228.98   48.70 
  -3   8   0  295.07   52.59 
  -3   8   0  280.27   45.10 
  -3   8   0  223.58   54.49 
  -8  -3   0  273.47   57.79 
   8   3   0  307.17   63.09 
   8   3   0  413.06   81.89 
   3  -8   0  286.77   54.29 
   3  -8   0  276.27   45.80 
  -3   8   0  306.97   61.89 
  -8  -3   0  161.78   55.89 
   3  -8   0  313.07   65.09 
   8   3   0  359.56   93.39 
  -8  -3   0  221.48   63.99 
  -3   8   0  320.47   60.69 
  -8  -3   0  350.36   70.99 
   3  -8   0  221.78   51.29 
   8   3   0  289.07   58.69 
   8   3   0  335.37   51.99 
  -8  -3   0  325.27   69.79 
  -8  -3   0  382.86   68.59 
  -8  -3   0  255.87   44.60 
   8   3   0  327.57   61.89 
   8   3   0  211.58   47.90 
  -3   8   0  174.38   41.80 
  -8  -3   0  239.68   60.39 
  -3   8   0  252.47   62.69 
   8   3   0  268.27   54.49 
   3  -8   0  203.68   58.69 
   8   3   0  255.87   65.69 
   8   3   0  200.38   51.39 
   3  -8   0  348.07   58.69 
   3  -8   0  210.38   59.39 
   3  -8   0  243.88   52.59 
   3  -8   0  197.18   49.99 
  -8  -3   0  270.87   56.89 
  -8  -3   0  263.87   45.30 
   3  -8   0  341.87   59.69 
   3  -8   0  231.48   47.10 
  -8  -3   0  198.28   53.69 
   8   3   0  270.27   41.30 
  -8  -3   0  179.88   45.90 
   3  -8   0  232.68   55.79 
   8   3   0  268.77   50.39 
   3  -8   0  264.17   52.69 
   3  -8   0  327.37   54.09 
   8   3   0  221.08   55.39 
  -8  -3   0  275.47   66.69 
  -3   8   0  271.27   71.79 
  -8  -3   0  216.78   50.79 
   8   3   0  302.67   61.79 
   8   3   0  348.47   67.59 
   8   3   0  316.57   57.79 
   8   3   0  247.88   68.29 
  -8  -2   0   61.59   36.20 
   2  -8   0  125.29   27.80 
   8   2   0   75.69   34.80 
   2  -8   0   49.90   31.80 
  -8  -2   0   67.59   37.00 
   8   2   0   46.20   33.90 
  -8  -2   0   47.10   35.90 
   8   2   0   97.69   42.40 
   8   2   0  109.69   47.80 
   2  -8   0   71.09   28.20 
  -8  -2   0   61.59   31.10 
  -2   8   0  100.99   28.90 
   8   2   0   77.99   29.80 
   2  -8   0   98.99   44.00 
   8   2   0   92.59   43.10 
   8   2   0   91.59   32.90 
   8   2   0   83.99   30.00 
   2  -8   0   66.99   30.30 
   2  -8   0   81.79   37.70 
  -2   8   0  101.89   26.30 
  -8  -2   0   56.79   32.50 
   2  -8   0   75.99   33.00 
  -8  -2   0   77.99   27.50 
   2  -8   0   40.50   29.40 
   2  -8   0  112.49   35.00 
  -8  -2   0   85.89   38.20 
   2  -8   0   87.39   33.20 
   8   2   0   96.69   34.30 
   8   2   0  128.49   45.60 
   2  -8   0   31.10   26.90 
  -8  -2   0  106.79   40.70 
  -2   8   0   72.59   34.60 
   8   2   0  150.88   42.30 
  -2   8   0  105.39   35.70 
   2  -8   0   92.49   33.00 
  -8  -2   0   78.69   28.40 
   8   2   0  154.48   50.69 
   2  -8   0   64.59   31.60 
   8   2   0  175.48   63.49 
   2  -8   0   93.49   37.60 
   2  -8   0   48.30   26.60 
  -2   8   0   50.89   25.90 
  -8  -2   0   62.99   29.00 
   8   2   0   99.09   29.40 
  -2   8   0   99.49   30.80 
   2  -8   0   70.09   42.30 
  -8  -2   0   81.69   33.80 
  -2   8   0   67.29   43.40 
   8   2   0   48.90   29.70 
  -8  -2   0   75.39   30.50 
  -8  -2   0  100.49   42.40 
  -8  -2   0   73.29   30.30 
   8   2   0   45.90   26.30 
  -8  -2   0   58.69   34.80 
  -2   8   0   41.70   27.70 
   8   2   0   73.59   32.50 
  -2   8   0   56.89   32.50 
  -2   8   0   36.10   35.70 
  -8  -1   0    1.00   16.80 
   1  -8   0  -22.80   19.90 
   1  -8   0   21.10   21.80 
   1  -8   0   20.70   26.30 
   1  -8   0   13.40   17.10 
  -8  -1   0  -22.50   15.10 
  -1   8   0   -5.00   13.30 
   8   1   0   15.20   18.80 
  -1   8   0   19.20   23.10 
   1  -8   0    5.00   15.40 
   8   1   0    2.40   18.00 
  -8  -1   0   13.90   20.90 
  -8  -1   0  -23.20   20.60 
   8   1   0   -0.30   16.70 
  -8  -1   0   -8.70   16.10 
   1  -8   0   16.30   24.40 
   1  -8   0   18.50   15.30 
  -1   8   0   27.20   20.40 
  -8  -1   0   19.80   29.00 
  -1   8   0    4.60   15.50 
   8   1   0  -16.10   15.50 
   1  -8   0   31.70   26.80 
   8   1   0   21.10   31.30 
   8   1   0  -23.10   18.90 
   1  -8   0  -21.60   18.80 
  -1   8   0   -8.30   20.10 
  -8  -1   0   -6.50   29.40 
  -1   8   0   -0.90   19.00 
   8   1   0   31.50   24.60 
  -8  -1   0  -15.30   20.70 
  -1   8   0   -1.60   19.00 
  -1   8   0   -6.40   13.50 
  -8  -1   0   21.60   18.80 
   1  -8   0    0.70   15.30 
   8   1   0   13.00   28.40 
   1  -8   0  -10.00   19.40 
   8   1   0   38.40   43.20 
   1  -8   0   -8.10   16.60 
  -1   8   0  -31.10   16.70 
   1  -8   0  -25.70   20.30 
  -8  -1   0    2.20   18.00 
   8   1   0   23.30   31.70 
   8   1   0    4.70   19.60 
  -8  -1   0   50.89   29.70 
  -1   8   0    9.20   19.30 
   1  -8   0   22.60   20.90 
   1  -8   0   -3.40   15.80 
  -8  -1   0    8.50   20.60 
   8   1   0    1.90   20.20 
   1  -8   0   35.80   32.60 
  -1   8   0    7.90   25.30 
  -1   8   0   49.30   23.90 
  -8  -1   0   -1.20   21.00 
  -8  -1   0   36.00   31.70 
  -1   8   0   20.10   15.30 
   1  -8   0   32.20   26.70 
   8   1   0  -13.30   19.70 
   8   1   0  -11.60   26.40 
  -1   8   0  -14.20   13.90 
   8   1   0   11.20   29.00 
   8   1   0   16.70   21.10 
   1  -8   0    8.00   15.00 
  -8  -1   0  -10.10   16.00 
   1  -8   0   17.10   22.10 
  -8  -1   0    7.50   22.90 
  -8  -1   0  -10.20   28.00 
   8   1   0    0.10   14.70 
   0  -8   0  615.14   75.29 
   8   0   0  538.45   75.39 
   8   0   0  691.83   90.59 
   0  -8   0  672.63   75.79 
   0  -8   0  669.03   90.99 
   8   0   0  802.02   84.59 
   0   8   0  757.42   79.09 
   0   8   0  624.64   80.39 
   0  -8   0  655.13   97.39 
  -8   0   0  539.95   80.89 
  -8   0   0  595.44   87.09 
   0   8   0  677.03   97.29 
  -8   0   0  846.22   88.99 
  -8   0   0  630.94   90.69 
   0  -8   0  760.02   83.49 
  -8   0   0  708.83   96.29 
   0  -8   0  711.93   99.19 
  -8   0   0  797.12   97.49 
  -8   0   0  762.12   91.59 
   8   0   0  635.84   87.89 
  -8   0   0  706.23   81.09 
   0  -8   0  579.94   79.59 
  -8   0   0  516.65   85.19 
   0   8   0  853.51  105.39 
   0   8   0  766.92   94.29 
   8   0   0  533.85   79.19 
   0   8   0  625.84   78.59 
   0   8   0  567.94   65.69 
   8   0   0  820.82   80.59 
  -8   0   0  650.43   81.99 
  -8   0   0  629.54   73.89 
   0   8   0  657.83   93.09 
   0   8   0  711.93   92.79 
   8   0   0  826.92   90.19 
   0  -8   0  813.52   99.49 
   0   8   0  841.32   90.89 
  -8   0   0  630.24   97.39 
   8   0   0  772.92   83.09 
   0  -8   0  910.31   98.79 
   0  -8   0  670.33   95.59 
   0  -8   0  679.13   73.29 
   0  -8   0  572.04   91.09 
   0  -8   0  825.92   81.09 
   8   0   0  664.23   83.79 
   0  -8   0  780.72   95.49 
  -8   0   0  576.14   77.59 
   0  -8   0  551.74   81.19 
   0   8   0  619.04   67.89 
   0   8   0  735.73   72.89 
   8   0   0  694.73  123.29 
   8   0   0  798.62   99.89 
   8   0   0  699.43  108.79 
   8   0   0  787.82  109.99 
   8   0   0  714.03  105.29 
   0  -8   0  904.81   84.69 
   8   0   0  638.04   74.89 
   0  -8   0  725.63   74.69 
   8   0   0  855.11  112.99 
   0   8   0  567.84   84.99 
   0   8   0  641.24  100.49 
   0   8   0  605.74   84.39 
   8   0   0  613.04   86.79 
  -8   0   0  642.74   90.79 
   0  -8   0  595.24   71.99 
  -8   0   0  700.73  102.19 
   0  -8   0  700.63   85.39 
   0  -8   0  610.34   84.39 
   8   0   0  707.43   90.79 
   8   0   0  667.03   89.69 
  -8   0   0  670.93   79.39 
  -8   1   0    3.00   16.50 
  -1  -8   0   15.40   19.40 
   1   8   0  -30.90   16.40 
  -1  -8   0   -1.00   15.90 
  -8   1   0   30.90   27.90 
   8  -1   0   -2.70   32.80 
   1   8   0  -24.90   20.80 
  -8   1   0   15.50   22.90 
  -8   1   0   -0.30   20.70 
   1   8   0   13.00   16.40 
  -8   1   0    0.20   21.30 
  -8   1   0  -26.20   23.80 
   8  -1   0   21.10   18.60 
   8  -1   0    4.40   19.50 
   1   8   0  -14.30   12.90 
   1   8   0  -10.40   14.70 
  -1  -8   0   -6.20   22.00 
  -1  -8   0   87.79   25.00 
   8  -1   0   -4.60   21.70 
  -1  -8   0   10.80   22.30 
  -1  -8   0   20.20   19.60 
  -8   1   0   -7.80   14.80 
   8  -1   0    8.30   17.10 
  -8   1   0  -15.90   17.10 
   1   8   0    7.20   17.00 
  -1  -8   0   -2.90   19.40 
  -8   1   0   -3.20   14.00 
   8  -1   0   -8.80   13.80 
  -8   1   0    4.90   24.20 
  -8   1   0    4.60   19.50 
   8  -1   0   -5.50   17.50 
  -1  -8   0   -4.10   20.10 
   8  -1   0  -11.60   20.50 
  -8   1   0   24.80   20.40 
   8  -1   0    3.10   18.50 
   8  -1   0   -2.50   35.90 
   8  -1   0   30.50   18.80 
   1   8   0   44.00   32.40 
   8  -1   0    6.20   19.40 
  -1  -8   0   37.00   23.00 
  -1  -8   0   -6.70   19.40 
  -1  -8   0   26.00   26.70 
  -8   1   0   -2.00   16.60 
   8  -1   0   -6.90   28.50 
   8  -1   0   14.10   27.20 
  -8   1   0   24.00   23.00 
   8  -1   0   -3.50   22.80 
   8  -1   0    1.60   19.50 
   8  -1   0   47.40   28.80 
  -8   1   0   -1.70   20.60 
   1   8   0  -18.10   18.10 
   1   8   0    3.50   25.10 
   8  -1   0    1.00   30.90 
  -1  -8   0   -3.20   21.40 
   1   8   0   -2.80   19.90 
  -1  -8   0   10.10   26.00 
   1   8   0   50.49   30.10 
  -1  -8   0  -10.30   16.10 
  -1  -8   0   -5.70   19.80 
   1   8   0  -25.60   18.60 
   8  -1   0   -4.00   17.00 
   2   8   0  125.79   46.10 
  -8   2   0  106.49   38.20 
  -8   2   0  146.39   44.60 
  -8   2   0   42.10   29.70 
   2   8   0  113.19   44.60 
  -8   2   0   15.90   27.10 
  -8   2   0   98.59   30.30 
  -2  -8   0  126.09   39.20 
   2   8   0   51.19   29.30 
  -2  -8   0   33.90   29.20 
  -2  -8   0   96.09   36.30 
  -2  -8   0   72.19   29.40 
  -2  -8   0   74.89   32.60 
   2   8   0  134.19   33.10 
   8  -2   0  115.09   35.70 
  -8   2   0   67.29   30.80 
   2   8   0    4.70   24.30 
   8  -2   0   35.30   25.20 
  -2  -8   0   58.29   29.60 
   8  -2   0   61.39   45.90 
   8  -2   0  116.19   38.20 
   8  -2   0   51.49   31.90 
  -2  -8   0   65.39   35.80 
  -2  -8   0  143.69   41.40 
   8  -2   0  132.79   46.90 
  -2  -8   0   83.29   35.20 
   8  -2   0  118.79   50.09 
  -8   2   0   98.19   36.50 
  -2  -8   0  113.19   38.60 
   8  -2   0   78.99   31.20 
   2   8   0   95.29   35.00 
  -2  -8   0   36.50   28.80 
   8  -2   0   58.09   29.10 
   8  -2   0   87.19   40.70 
   8  -2   0   62.29   40.90 
  -8   2   0   95.49   30.90 
   2   8   0  114.19   36.60 
   2   8   0   67.29   31.90 
  -2  -8   0  142.19   44.30 
  -2  -8   0   69.99   37.20 
   8  -2   0  110.19   36.00 
  -8   2   0   61.49   26.70 
   2   8   0   45.60   27.20 
  -8   2   0   32.50   22.10 
   8  -2   0   88.19   35.10 
   2   8   0  125.19   44.60 
   2   8   0   98.49   41.50 
   2   8   0  107.69   33.20 
  -8   2   0   59.69   25.90 
   8  -2   0   64.09   37.40 
  -8   2   0   82.69   41.80 
   8  -2   0  116.19   36.00 
  -8   2   0   87.99   32.00 
  -2  -8   0   64.89   30.30 
   8  -2   0   88.49   29.10 
  -8   2   0  106.59   38.30 
   2   8   0  114.29   39.80 
  -2  -8   0   88.99   36.60 
  -2  -8   0   63.49   30.90 
   8  -2   0   44.40   40.10 
  -3  -8   0  163.58   53.29 
   8  -3   0  301.67   72.49 
   8  -3   0  341.67   63.19 
   8  -3   0  353.86   89.09 
  -8   3   0  307.97   49.10 
  -8   3   0  228.78   46.60 
  -3  -8   0  295.97   65.99 
   8  -3   0  323.07   62.59 
  -8   3   0  303.17   63.19 
  -8   3   0  354.26   72.69 
   3   8   0  269.27   55.19 
  -3  -8   0  282.47   52.69 
  -8   3   0  229.28   51.69 
   3   8   0  285.47   59.39 
  -3  -8   0  303.87   62.29 
   3   8   0  203.48   54.09 
   3   8   0  339.07   67.99 
   8  -3   0  322.67   81.09 
   8  -3   0  319.97   59.99 
  -3  -8   0  292.97   59.89 
  -8   3   0  263.87   49.80 
   8  -3   0  346.37   70.89 
   8  -3   0  231.48   54.09 
   3   8   0  223.88   55.69 
  -3  -8   0  447.76   66.39 
   3   8   0  292.87   55.59 
   8  -3   0  262.27   50.09 
   8  -3   0  154.48   44.20 
  -3  -8   0  394.86   66.99 
  -3  -8   0  248.98   61.89 
  -3  -8   0  286.27   60.29 
  -3  -8   0  323.97   66.19 
   8  -3   0  329.37   59.09 
   3   8   0  214.28   57.89 
   3   8   0  307.47   50.89 
  -3  -8   0  292.97   60.79 
  -8   3   0  217.48   55.69 
   3   8   0  276.27   55.59 
  -8   3   0  308.07   55.99 
   8  -3   0  301.37   52.99 
   3   8   0  319.77   67.79 
   8  -3   0  276.77   55.39 
  -3  -8   0  126.39   41.70 
  -8   3   0  370.46   63.89 
  -3  -8   0  275.27   61.49 
   8  -3   0  359.26   71.09 
  -8   3   0  310.57   57.79 
  -8   3   0  369.86   69.89 
   3   8   0  190.98   55.99 
  -3  -8   0  343.87   65.09 
  -3  -8   0  311.47   65.89 
  -8   3   0  165.88   46.90 
   3   8   0  299.17   56.79 
  -3  -8   0  387.76   79.09 
   3   8   0  326.17   55.49 
   8  -3   0  267.97   49.99 
   8  -4   0 2512.85  191.48 
   8  -4   0 2361.96  176.68 
  -8   4   0 2411.36  170.18 
  -8   4   0 2390.96  191.88 
  -8   4   0 2535.85  192.18 
   8  -4   0 2203.48  173.38 
   4   8   0 2558.14  188.38 
   4   8   0 2696.63  196.58 
   8  -4   0 2026.20  183.68 
  -8   4   0 2281.17  174.08 
   8  -4   0 2477.55  202.08 
  -8   4   0 2292.17  175.58 
   8  -4   0 2319.87  212.58 
   8  -4   0 2177.08  183.18 
  -4  -8   0 2421.56  199.08 
   4   8   0 2698.43  208.88 
   4   8   0 2103.29  201.08 
  -4  -8   0 2251.57  186.78 
   8  -4   0 2140.19  235.68 
  -4  -8   0 2322.97  193.58 
   4   8   0 2549.54  191.68 
   4   8   0 2351.66  182.58 
  -4  -8   0 2754.62  213.38 
   8  -4   0 2170.68  206.58 
   8  -4   0 2247.38  183.48 
  -8   4   0 2447.85  185.28 
  -4  -8   0 2350.06  193.58 
  -4  -8   0 2647.34  185.98 
  -4  -8   0 2235.98  188.58 
  -4  -8   0 2490.25  189.88 
  -8   4   0 2153.68  177.18 
  -8   4   0 2117.99  182.88 
   4   8   0 2757.02  196.98 
   8  -4   0 2464.85  190.78 
  -4  -8   0 2461.75  197.88 
  -8   4   0 2395.56  203.68 
  -4  -8   0 2367.06  191.28 
  -4  -8   0 2428.56  191.88 
  -8   4   0 2224.28  182.28 
  -8   4   0 2429.56  200.58 
   8  -4   0 2556.64  182.78 
   4   8   0 2208.58  184.78 
  -8   4   0 2421.86  198.98 
   4   8   0 2574.14  196.08 
  -4  -8   0 2435.46  197.48 
   4   8   0 2290.77  189.48 
   4   8   0 2505.05  185.98 
  -8   4   0 2285.47  179.78 
  -4  -8   0 2029.20  186.68 
   4   8   0 2582.84  190.58 
  -4  -8   0 2718.73  185.38 
  -4  -8   0 2195.78  198.28 
   4   8   0 2394.06  190.78 
   8  -4   0 2129.49  196.08 
   8  -4   0 2527.45  188.78 
   8  -4   0 2130.89  173.58 
  -8   5   0  276.97   49.00 
  -8   5   0  155.98   58.29 
  -5  -8   0  278.47   63.09 
   8  -5   0  209.88   59.69 
  -8   5   0   96.79   53.69 
   5   8   0  215.68   54.39 
  -5  -8   0  238.48   67.09 
  -8   5   0  283.17   71.99 
  -5  -8   0  386.56   62.99 
  -8   5   0  239.28   57.39 
   5   8   0  300.87   76.09 
   8  -5   0  194.18   53.69 
   5   8   0  267.37   59.99 
  -5  -8   0  221.58   55.19 
   8  -5   0  240.98   72.59 
   8  -5   0  329.77   68.99 
   5   8   0  389.26   73.59 
   8  -5   0  191.18   47.60 
   5   8   0  224.28   52.89 
   5   8   0  167.68   51.69 
  -8   5   0  195.18   51.99 
  -5  -8   0  186.08   49.99 
   8  -5   0  240.28   48.50 
   8  -5   0  313.97   87.59 
   8  -5   0  166.08   52.19 
  -5  -8   0  249.68   65.39 
  -5  -8   0  223.38   58.09 
   8  -5   0  206.58   52.59 
   8  -5   0  315.57   64.89 
   8  -5   0  205.08   52.69 
  -5  -8   0  271.27   59.59 
   5   8   0  201.98   52.39 
   8  -5   0  282.27   66.99 
   5   8   0  195.78   51.99 
   5   8   0  296.97   60.79 
   5   8   0  199.68   63.29 
  -8   5   0  186.78   65.39 
  -5  -8   0  256.27   55.89 
   8  -5   0  256.87   77.09 
  -5  -8   0  280.37   70.59 
  -5  -8   0  216.38   61.79 
   8  -5   0  381.76   80.69 
   5   8   0  257.27   58.59 
   5   8   0  252.87   61.19 
  -5  -8   0  274.37   63.49 
  -8   5   0  200.58   55.89 
  -8   5   0  236.38   51.69 
  -8   5   0  222.78   53.59 
  -5  -8   0  224.28   63.89 
   8  -5   0  257.97   48.20 
  -8   5   0  258.97   49.40 
   5   8   0  245.18   58.29 
  -5  -8   0  251.87   66.09 
  -5  -8   0  143.29   52.19 
  -8   6   0  544.85  102.19 
  -8   6   0  517.05   84.29 
   6   8   0  562.14   82.39 
   8  -6   0  512.15  104.09 
   6   8   0  461.85   78.89 
   6   8   0  605.34   90.89 
   8  -6   0  428.16   85.39 
   8  -6   0  422.46   71.99 
  -6  -8   0  355.06   85.39 
  -6  -8   0  561.34   98.09 
  -6  -8   0  500.55   82.59 
  -6  -8   0  434.56   80.79 
   8  -6   0  582.44   90.09 
  -8   6   0  596.04   79.49 
   8  -6   0  424.06   77.19 
   8  -6   0  495.55  101.29 
   6   8   0  461.75   78.99 
   8  -6   0  496.65   74.09 
  -8   6   0  578.64   72.69 
  -6  -8   0  580.34   98.19 
  -6  -8   0  458.35   81.89 
   6   8   0  492.45   99.09 
  -6  -8   0  349.07   80.59 
   8  -6   0  462.55  102.09 
   8  -6   0  502.05   88.59 
   8  -6   0  490.55   77.99 
   8  -6   0  488.05   86.29 
   6   8   0  407.56   83.29 
   6   8   0  423.46   77.29 
   6   8   0  445.96   75.09 
  -8   6   0  548.25  102.69 
  -8   6   0  545.15   83.49 
  -6  -8   0  770.22  105.79 
  -8   6   0  493.35   73.49 
  -6  -8   0  459.05   82.29 
  -6  -8   0  500.15   89.19 
   6   8   0  613.04   85.99 
   6   8   0  397.16   90.69 
   6   8   0  466.75   81.19 
  -6  -8   0  400.46   74.39 
   6   8   0  695.53  101.19 
  -6  -8   0  462.35   93.09 
   8  -6   0  514.45   97.79 
  -8   6   0  413.76   75.19 
  -6  -8   0  656.33  100.39 
   8  -6   0  420.96   80.09 
  -8   6   0  423.56   77.29 
  -8   6   0  355.86   74.69 
  -6  -8   0  680.73  104.19 
  -6  -8   0  530.65   96.09 
  -8   6   0  420.06   61.49 
   7   8   0    5.90   51.99 
  -7  -8   0   32.50   39.60 
   7   8   0   75.59   58.39 
  -7  -8   0   33.60   37.80 
   7   8   0  113.89   51.89 
   8  -7   0   42.60   47.90 
   8  -7   0   65.39   37.30 
   8  -7   0   65.79   37.70 
   7   8   0   84.09   41.20 
  -7  -8   0   42.80   42.30 
  -7  -8   0   60.09   49.50 
  -7  -8   0   32.00   43.20 
  -7  -8   0   95.39   47.60 
   7   8   0    9.60   30.30 
   7   8   0   -1.00   33.50 
   8  -7   0   80.69   50.29 
  -8   7   0   95.99   41.20 
   8  -7   0  100.79   50.99 
  -8   7   0   33.00   32.00 
  -7  -8   0  -11.50   34.70 
   7   8   0   48.90   44.80 
  -7  -8   0   56.59   37.60 
   8  -7   0    0.20   33.50 
   7   8   0   24.50   33.30 
  -8   7   0   60.19   37.40 
   8  -7   0   38.30   34.90 
  -7  -8   0   41.90   43.90 
   7   8   0  -11.40   27.60 
  -8   7   0   32.10   28.00 
  -8   7   0   53.89   36.70 
  -7  -8   0   81.69   47.10 
  -7  -8   0   14.40   29.00 
   7   8   0   67.79   39.20 
   8  -7   0   11.50   24.70 
   8  -7   0   17.50   44.50 
   8  -7   0   61.29   60.59 
  -8   7   0   40.10   34.80 
  -7  -8   0   39.50   49.60 
  -8   7   0   85.09   58.29 
  -8   7   0   26.00   24.90 
  -8   7   0   40.20   48.40 
   8   8   0  116.79   47.20 
   8  -8   0  146.59   48.70 
  -8   8   0  186.48   55.59 
   8   8   0   81.29   41.50 
  -8   8   0  104.49   43.50 
  -8  -8   0  260.77   73.99 
  -8   8   0  110.69   41.10 
   8   8   0  117.59   51.79 
  -8  -8   0   84.79   48.20 
   8   8   0   64.79   40.60 
   8  -8   0  157.48   62.59 
   8   8   0  173.08   70.69 
  -8   8   0   69.49   44.90 
   8   8   0   88.09   57.79 
  -8  -8   0   24.60   43.00 
   8  -8   0   84.59   71.09 
  -8  -8   0  125.49   45.90 
  -8   8   0  143.69   54.89 
   8  -8   0   92.39   62.89 
   8  -8   0  119.39   58.99 
  -8   8   0  126.39   50.59 
   8  -8   0   90.29   43.50 
   8  -8   0  127.19   49.40 
  -8  -8   0  178.28   67.09 
   8  -8   0   83.59   42.70 
   8  -8   0   81.29   56.99 
   8  -8   0   90.89   50.29 
  -8   8   0   -7.60   41.40 
  -8  -8   0  136.09   59.99 
  -8  -8   0  214.18   62.59 
  -8   8   0  168.58   71.99 
  -8  -8   0   79.09   49.50 
  -8   8   0  196.38   64.59 
   8   8   0  277.87   72.49 
  -8  -8   0  180.98   67.29 
  -8  -8   0   76.89   49.90 
   8  -9   0  153.08   75.99 
   9   8   0  186.38   63.99 
  -9  -8   0  210.58   70.89 
  -9  -8   0   93.79   55.69 
   9   8   0  186.68   64.09 
  -8   9   0  268.67   74.49 
  -9  -8   0  290.57   80.29 
  -9  -8   0  359.56   89.09 
  -9  -8   0  381.46   89.19 
  -9  -8   0  210.08   72.09 
  -9  -8   0  285.87   76.29 
   8  -9   0  392.16   93.29 
  -9  -8   0  415.36   90.69 
   8  -9   0  235.98   71.19 
   9   8   0  330.97   77.49 
  -8   9   0  314.37   94.09 
   8  -9   0  363.36   77.49 
   9   8   0  321.87   92.99 
   9   8   0  204.38   67.39 
  -8   9   0  163.68   72.39 
  -8   9   0  286.47   70.99 
  -9  -8   0  110.59   60.89 
  -8   9   0  312.97   73.29 
   9   8   0  480.65  111.09 
   8  -9   0  363.66   92.49 
  -9  -8   0  295.47   82.09 
   8  -9   0  301.67   87.59 
  -9  -7   0  220.58   67.49 
  -7   9   0  286.37   73.99 
   9   7   0  370.06   78.49 
   7  -9   0  258.97   64.69 
  -9  -7   0  161.18   60.69 
  -7   9   0  156.68   56.19 
   9   7   0  370.96   92.99 
   9   7   0  234.88   67.79 
  -7   9   0  260.97   57.39 
  -9  -7   0  250.17   72.59 
  -9  -7   0  180.98   71.99 
   7  -9   0  205.18   70.39 
   9   7   0  219.68   59.49 
   7  -9   0  182.18   56.49 
  -9  -7   0  178.38   58.49 
   7  -9   0  246.58   73.09 
  -9  -7   0  217.18   72.49 
  -9  -7   0  228.48   69.79 
   9   7   0  247.98   69.19 
  -9  -7   0  296.67   75.99 
  -7   9   0  203.48   79.19 
  -9  -7   0  412.46   88.99 
  -9  -7   0  185.88   65.39 
   7  -9   0  318.97   66.29 
   9   7   0  159.18   55.09 
  -7   9   0  263.37   62.69 
   9   7   0  130.39   51.59 
  -7   9   0  385.86   78.09 
   7  -9   0  146.19   63.69 
   7  -9   0  131.39   64.69 
  -9  -7   0  290.67   71.69 
   7  -9   0  204.58   70.09 
  -7   9   0  311.17   87.49 
   7  -9   0  166.88   60.79 
   9   7   0  245.08   58.89 
   9   7   0  213.08   74.69 
  -9  -7   0  264.97   72.19 
  -9  -6   0 1395.16  152.58 
   9   6   0 1743.33  194.58 
   6  -9   0 1308.07  143.19 
   9   6   0 1266.67  154.48 
  -9  -6   0 1798.92  176.68 
   6  -9   0  975.10  154.88 
   6  -9   0 1546.85  129.49 
   6  -9   0 1282.57  155.08 
   9   6   0 1237.48  142.19 
   9   6   0 1370.66  157.58 
   9   6   0 1611.64  160.28 
   9   6   0 1744.73  193.98 
  -9  -6   0 1180.28  154.58 
  -6   9   0 1217.08  141.09 
  -9  -6   0 1265.37  143.99 
   6  -9   0 1170.78  146.69 
  -6   9   0 1524.45  178.38 
  -9  -6   0 1135.39  154.98 
  -9  -6   0 1560.64  174.78 
   9   6   0 1112.99  131.89 
   6  -9   0 1406.66  164.88 
   9   6   0 1324.37  153.38 
  -6   9   0 1386.06  158.08 
  -9  -6   0 1545.35  173.28 
   9   6   0 1679.93  164.38 
  -6   9   0 1238.18  179.48 
  -9  -6   0 1361.66  173.28 
  -9  -6   0 1470.75  168.28 
  -9  -6   0 1123.59  147.99 
  -6   9   0 1280.97  148.19 
  -9  -6   0 1349.86  158.88 
  -6   9   0 1250.17  135.59 
  -6   9   0 1147.19  148.39 
   6  -9   0 1166.18  145.29 
  -6   9   0 1241.28  143.39 
  -9  -6   0 1066.29  154.18 
  -9  -6   0 1299.47  166.78 
   9   6   0 1534.15  160.38 
   6  -9   0 1753.32  183.68 
   6  -9   0 1443.56  167.98 
   5  -9   0  203.18   64.69 
  -9  -5   0  195.28   63.09 
  -9  -5   0  221.28   70.49 
   5  -9   0  203.18   66.19 
  -5   9   0  251.07   68.19 
   5  -9   0  228.58   53.09 
  -9  -5   0  295.27   64.79 
  -5   9   0  196.18   58.79 
  -9  -5   0  280.47   71.49 
  -9  -5   0  346.77   72.89 
  -5   9   0  391.66   69.99 
  -9  -5   0  272.57   61.19 
   9   5   0  331.87   73.09 
  -9  -5   0  239.78   67.09 
   5  -9   0  209.28   60.59 
  -5   9   0  186.88   49.30 
  -5   9   0  177.68   51.29 
   9   5   0  244.18   57.29 
  -9  -5   0  266.17   67.49 
  -5   9   0  228.08   61.69 
   5  -9   0  185.38   62.49 
  -5   9   0  284.07   70.19 
   9   5   0  351.26   63.29 
   5  -9   0  383.36   78.19 
   9   5   0  277.17   63.09 
   5  -9   0  232.68   61.09 
   5  -9   0  325.17   70.59 
   5  -9   0  237.38   63.89 
  -5   9   0  340.47   91.39 
   9   5   0  250.47   64.89 
  -9  -5   0  247.78   69.09 
  -9  -5   0  295.07   72.89 
   9   5   0  303.27   70.29 
  -9  -5   0  216.18   60.99 
   5  -9   0  254.97   58.29 
   9   5   0  295.27   78.39 
   5  -9   0  311.17   59.69 
   9   5   0  285.07   65.09 
  -9  -5   0  297.57   74.69 
   9   5   0  397.86   90.09 
   9   5   0  206.38   56.39 
  -9  -5   0  189.48   60.09 
   9   5   0  242.08   75.89 
  -9  -5   0  217.78   61.49 
   4  -9   0  248.88   59.39 
   9   4   0  179.08   63.69 
  -9  -4   0  113.89   44.90 
   9   4   0  156.48   47.50 
   4  -9   0  171.28   48.00 
  -9  -4   0  251.77   63.39 
  -9  -4   0  126.39   49.50 
   9   4   0  229.88   53.09 
  -4   9   0  225.78   53.49 
   4  -9   0  205.58   53.09 
  -9  -4   0  254.07   60.39 
   4  -9   0  150.78   50.29 
  -9  -4   0  211.28   67.19 
  -4   9   0  199.88   69.69 
   4  -9   0  153.48   59.69 
  -4   9   0  214.58   58.59 
  -4   9   0  178.48   51.49 
   9   4   0  121.89   41.00 
   9   4   0  223.48   54.79 
  -4   9   0  243.98   50.79 
  -4   9   0  149.39   56.89 
  -4   9   0  171.28   59.19 
  -9  -4   0  162.18   49.10 
  -9  -4   0  159.88   53.79 
   9   4   0  100.99   43.70 
   4  -9   0  204.48   58.29 
  -9  -4   0  278.07   61.29 
   9   4   0   88.39   42.80 
  -4   9   0  136.49   46.70 
   4  -9   0  189.38   56.09 
   9   4   0  282.47   67.19 
   9   4   0  185.48   54.29 
   4  -9   0   88.99   37.90 
   9   4   0  258.27   56.69 
  -9  -4   0   62.59   39.00 
   9   4   0  209.38   68.59 
   4  -9   0  142.79   50.09 
  -9  -4   0  202.78   59.79 
  -9  -4   0   62.09   44.50 
   4  -9   0  251.67   68.79 
   4  -9   0  232.98   54.39 
   9   4   0  198.88   68.89 
  -9  -4   0  143.39   54.49 
  -9  -4   0  135.09   49.90 
   3  -9   0 1000.50  124.59 
   9   3   0 1698.43  196.28 
  -9  -3   0 1436.46  150.58 
  -9  -3   0 1144.89  142.49 
   9   3   0 1190.18  134.39 
   3  -9   0 1113.79  124.59 
  -3   9   0 1106.19  124.59 
  -9  -3   0 1223.68  132.89 
   9   3   0  913.91  114.79 
   3  -9   0 1161.28  141.29 
  -3   9   0 1116.09  138.19 
   9   3   0 1409.76  142.49 
   3  -9   0 1193.98  154.48 
   3  -9   0 1134.79  134.19 
  -9  -3   0  971.20  134.69 
   9   3   0  924.71  128.89 
   3  -9   0 1341.67  158.18 
  -3   9   0 1102.19  133.89 
  -9  -3   0  961.00  134.39 
   3  -9   0 1185.98  109.29 
   3  -9   0 1138.59  136.79 
   3  -9   0 1298.27  112.59 
  -3   9   0 1248.88  106.29 
   3  -9   0 1083.39  129.79 
   9   3   0 1375.16  162.58 
   3  -9   0 1245.88  133.89 
  -9  -3   0 1365.96  109.89 
  -3   9   0 1170.28  136.69 
  -9  -3   0 1206.48  132.69 
  -9  -3   0 1177.88  145.39 
   9   3   0 1353.36  135.79 
  -9  -3   0 1204.48  140.49 
   9   3   0 1350.36  156.78 
  -9  -3   0 1341.27  155.58 
  -3   9   0 1206.48  123.89 
  -3   9   0 1141.89  147.19 
  -9  -3   0 1202.68  135.69 
  -3   9   0 1091.39  156.68 
   9   3   0  964.80  127.69 
  -9  -3   0 1220.38  137.29 
   9   3   0 1726.53  164.98 
  -9  -3   0 1052.79  138.59 
   3  -9   0  996.40  123.79 
   3  -9   0 1288.87  132.99 
   9   3   0 1463.65  148.29 
  -9  -2   0  135.29   45.10 
   9   2   0  159.88   52.99 
  -9  -2   0  208.68   57.39 
  -2   9   0  213.28   54.89 
   9   2   0  120.99   53.29 
   9   2   0  128.99   39.00 
   2  -9   0   96.89   46.40 
   2  -9   0  157.68   45.50 
  -2   9   0  178.78   39.90 
   9   2   0  121.79   42.70 
  -9  -2   0  225.08   49.40 
   9   2   0  133.19   41.60 
   2  -9   0  153.48   44.50 
  -9  -2   0  141.89   49.40 
  -9  -2   0  125.69   40.70 
  -9  -2   0  145.99   50.09 
   9   2   0  150.28   48.80 
   9   2   0  239.58   58.79 
   9   2   0  142.99   46.10 
   2  -9   0  224.48   51.79 
   2  -9   0   83.99   38.30 
  -9  -2   0  127.19   54.09 
   9   2   0   84.89   35.60 
   2  -9   0  179.98   54.29 
   2  -9   0   98.19   39.20 
   2  -9   0  183.58   57.49 
   2  -9   0  107.39   36.50 
  -2   9   0  153.78   50.79 
   9   2   0  153.48   47.50 
   9   2   0  143.49   52.19 
  -2   9   0  143.89   36.20 
   9   2   0  107.09   46.80 
  -9  -2   0  118.69   45.70 
   2  -9   0   98.19   41.50 
   2  -9   0  146.09   41.90 
  -9  -2   0   65.29   39.20 
   9   2   0   84.69   39.90 
  -9  -2   0   53.79   36.30 
  -2   9   0  186.28   46.10 
   2  -9   0   94.29   37.80 
  -2   9   0   82.89   40.60 
  -9  -2   0   93.69   36.80 
   9   2   0   59.89   53.19 
   2  -9   0  145.19   49.99 
   9   2   0  137.09   49.10 
  -2   9   0  181.38   60.99 
  -9  -2   0  160.78   52.99 
  -9  -2   0  182.28   49.60 
   2  -9   0  158.98   55.29 
  -2   9   0   50.79   44.50 
  -2   9   0  130.49   41.00 
   1  -9   0  216.28   46.60 
  -9  -1   0  261.87   68.19 
   1  -9   0  259.07   59.59 
   1  -9   0  169.28   41.20 
  -9  -1   0  275.97   55.79 
  -9  -1   0  367.96   61.29 
   9   1   0  204.78   61.49 
   9   1   0  225.08   60.69 
   9   1   0  419.96  103.69 
   1  -9   0  206.68   48.70 
   9   1   0  131.29   47.00 
  -1   9   0  296.97   55.19 
   1  -9   0  165.08   50.29 
   1  -9   0  291.67   54.99 
   1  -9   0  298.07   67.59 
  -1   9   0  262.37   64.79 
   9   1   0  170.38   45.00 
   1  -9   0  223.78   47.40 
  -9  -1   0  168.58   45.20 
   1  -9   0  220.18   53.49 
  -9  -1   0  247.38   56.99 
  -9  -1   0  272.77   66.79 
   9   1   0  277.77   55.49 
   1  -9   0  213.88   61.59 
  -1   9   0  278.87   46.50 
  -9  -1   0  314.77   67.29 
   9   1   0  209.18   64.39 
  -9  -1   0  215.68   49.60 
   9   1   0  264.37   48.40 
  -9  -1   0  238.38   63.39 
  -1   9   0  175.78   38.20 
   9   1   0  140.19   47.00 
  -9  -1   0  252.97   48.10 
   9   1   0  230.58   58.79 
  -1   9   0  211.38   70.19 
  -1   9   0  225.08   54.79 
  -9  -1   0  180.98   46.40 
   9   1   0  208.58   47.90 
  -9  -1   0  186.48   49.80 
   1  -9   0  146.29   54.39 
   9   1   0  262.77   66.69 
   9   1   0  203.98   50.79 
  -1   9   0  165.38   52.99 
  -1   9   0  256.87   61.19 
  -9  -1   0  153.78   53.59 
   1  -9   0  120.59   43.70 
  -9  -1   0  331.27   73.89 
   1  -9   0  134.59   50.99 
   9   1   0  194.48   49.90 
   9   1   0  251.47   57.29 
  -9  -1   0  148.29   47.40 
   1  -9   0  168.78   50.99 
   0  -9   0   -6.40   22.10 
   9   0   0   39.40   41.60 
   0  -9   0   -2.20   23.00 
   9   0   0   12.60   27.30 
   9   0   0   24.70   42.50 
   9   0   0   -5.30   21.90 
   9   0   0   11.80   23.10 
  -9   0   0  -10.60   24.30 
   0  -9   0    4.40   25.50 
   9   0   0  -21.90   22.80 
   0  -9   0   -0.30   19.50 
   0   9   0   39.90   29.50 
   9   0   0  -35.20   29.90 
   0  -9   0  -30.40   21.90 
  -9   0   0    3.80   24.30 
  -9   0   0   -8.50   18.40 
  -9   0   0  -10.70   15.40 
   0  -9   0   38.60   29.70 
   0   9   0   19.40   25.60 
   0  -9   0   -5.90   18.40 
   0  -9   0  -12.40   24.20 
   0  -9   0   22.10   24.30 
   9   0   0   -9.50   35.10 
   9   0   0    0.50   24.20 
   9   0   0    9.10   26.30 
  -9   0   0   -7.30   20.60 
  -9   0   0   14.20   19.70 
   9   0   0  -25.10   21.30 
   0  -9   0   16.90   20.50 
   0   9   0   47.80   36.40 
   0   9   0  -37.50   22.60 
   0   9   0   10.10   24.30 
   9   0   0  -10.10   27.50 
   0   9   0   34.60   33.40 
  -9   0   0   -8.80   25.50 
  -9   0   0  -25.20   23.30 
   0  -9   0    0.70   17.80 
   9   0   0   -4.70   19.20 
   0  -9   0   14.50   30.40 
  -9   0   0  -31.20   30.80 
   9   0   0   49.70   22.60 
  -9   0   0   25.20   24.80 
  -9   0   0   -1.90   17.80 
  -9   0   0   -1.70   21.30 
   0  -9   0  -22.60   22.80 
   0  -9   0  -10.80   18.00 
  -9   0   0   -1.40   22.00 
  -9   0   0  -18.10   27.60 
  -9   0   0   26.30   35.60 
  -9   0   0   -9.20   20.80 
  -9   0   0  -21.40   20.20 
  -9   0   0  -16.00   27.70 
   9   0   0   12.90   21.70 
   0   9   0    9.50   24.30 
   9   0   0   -7.00   23.00 
   0   9   0  -16.50   14.80 
   0   9   0   33.30   30.00 
  -9   0   0   -3.50   38.20 
   0  -9   0   18.20   26.10 
   9   0   0    8.20   22.50 
   9   0   0   25.60   25.80 
   9  -1   0  206.28   49.99 
   1   9   0  187.28   64.39 
  -9   1   0  215.48   48.90 
  -9   1   0  199.78   43.50 
  -1  -9   0  323.07   71.49 
   1   9   0  260.77   69.09 
   1   9   0  271.77   62.89 
   9  -1   0  248.68   75.19 
  -1  -9   0  308.07   56.69 
   1   9   0  160.48   49.30 
  -9   1   0  354.46   76.19 
  -9   1   0  265.47   54.79 
  -9   1   0  240.38   53.09 
   9  -1   0  159.88   70.39 
   9  -1   0  172.08   42.60 
   9  -1   0  217.48   53.29 
  -1  -9   0  192.78   46.50 
  -9   1   0  198.58   52.19 
   9  -1   0  241.58   53.99 
  -9   1   0  201.78   60.29 
  -1  -9   0  150.88   49.30 
  -1  -9   0  119.99   44.30 
  -9   1   0  135.99   42.30 
   1   9   0  223.78   49.50 
   1   9   0  207.18   49.90 
   1   9   0  217.28   57.29 
   9  -1   0  161.68   49.70 
  -9   1   0  198.98   49.20 
   9  -1   0   96.59   45.40 
  -1  -9   0  155.98   47.60 
  -1  -9   0  158.18   45.40 
   9  -1   0  250.77   67.09 
   9  -1   0  211.58   63.49 
  -9   1   0  265.67   56.09 
  -9   1   0  182.68   49.99 
   9  -1   0  275.17   56.39 
   9  -1   0  240.58   54.69 
  -9   1   0  246.28   59.79 
   1   9   0  280.17   50.59 
   1   9   0  202.98   52.89 
  -9   1   0  309.17   60.39 
   9  -1   0  157.88   49.40 
  -1  -9   0  175.18   53.29 
  -1  -9   0  259.37   53.09 
   1   9   0  167.18   47.80 
  -1  -9   0  213.68   55.59 
  -1  -9   0  197.38   50.69 
  -1  -9   0  160.58   47.00 
  -9   1   0  161.68   53.59 
   9  -1   0  142.09   40.50 
  -1  -9   0  230.08   64.19 
  -9   1   0  238.28   58.89 
   9  -1   0  231.98   51.79 
   9  -1   0  176.98   49.00 
   9  -2   0  176.08   51.79 
  -2  -9   0   97.29   41.20 
   9  -2   0  150.18   59.99 
   9  -2   0  121.79   34.90 
  -2  -9   0  139.29   43.80 
  -9   2   0  130.19   44.60 
  -9   2   0   90.99   44.90 
  -9   2   0   85.79   33.50 
  -9   2   0  109.29   40.50 
   2   9   0   70.89   39.70 
   2   9   0  149.39   37.80 
   9  -2   0  183.68   54.69 
  -9   2   0   62.59   44.10 
  -9   2   0  124.09   49.40 
   9  -2   0  153.88   45.90 
   9  -2   0  153.58   68.49 
  -9   2   0   51.39   38.30 
  -2  -9   0  179.38   50.09 
   2   9   0  189.08   53.99 
   9  -2   0   80.59   52.69 
  -9   2   0  174.78   48.90 
  -9   2   0  159.98   50.19 
   2   9   0  147.19   57.89 
   2   9   0  128.39   46.40 
   9  -2   0  126.29   41.00 
   9  -2   0  206.38   48.70 
   9  -2   0  142.99   45.00 
  -2  -9   0  185.48   50.69 
  -2  -9   0  235.28   47.30 
  -9   2   0  102.69   34.90 
  -2  -9   0  112.49   42.90 
  -2  -9   0  145.19   42.50 
  -2  -9   0  131.19   51.49 
   9  -2   0  168.78   54.69 
   2   9   0   82.39   39.80 
  -2  -9   0  152.18   47.80 
   9  -2   0  132.39   44.10 
   9  -2   0  187.98   53.29 
  -9   2   0  165.28   44.10 
  -2  -9   0  140.79   55.99 
   2   9   0  103.29   38.10 
  -9   2   0  148.49   45.60 
   2   9   0  171.18   54.49 
   2   9   0  147.49   53.09 
  -2  -9   0   77.69   46.40 
  -2  -9   0   97.09   41.30 
  -2  -9   0  126.49   48.50 
  -9   2   0  151.38   44.00 
   2   9   0   91.99   35.70 
  -2  -9   0  206.38   49.20 
  -2  -9   0  177.08   53.59 
   9  -2   0    5.00   40.70 
   9  -2   0  171.38   45.10 
   2   9   0  123.59   43.10 
  -3  -9   0 1466.65  144.89 
   9  -3   0 1053.69  130.09 
  -9   3   0 1008.60  119.39 
   9  -3   0 1211.08  161.68 
   3   9   0 1248.48  132.49 
  -9   3   0 1052.09  113.89 
  -3  -9   0 1133.49  136.09 
   3   9   0 1397.76  157.88 
  -3  -9   0 1224.68  140.39 
  -9   3   0 1126.49  149.19 
  -9   3   0 1432.46  146.59 
  -3  -9   0 1372.76  157.28 
   9  -3   0 1390.56  148.49 
   3   9   0 1132.99  136.29 
  -9   3   0 1260.57  137.89 
  -3  -9   0 1315.37  159.38 
  -9   3   0 1423.16  149.79 
  -3  -9   0 1306.87  135.69 
  -9   3   0 1272.77  129.09 
  -3  -9   0 1187.18  141.09 
   9  -3   0 1180.88  132.49 
  -3  -9   0 1319.37  136.29 
   9  -3   0 1263.37  137.39 
   9  -3   0 1278.67  174.48 
  -3  -9   0 1248.88  137.59 
   3   9   0 1261.67  144.49 
  -9   3   0 1072.59  130.79 
   3   9   0 1298.17  145.09 
  -3  -9   0 1226.28  150.38 
  -9   3   0 1315.87  148.89 
  -9   3   0 1204.58  137.49 
   9  -3   0 1008.00  121.89 
   3   9   0 1147.19  130.99 
  -3  -9   0  947.91  130.89 
   3   9   0 1235.08  136.69 
   9  -3   0 1444.46  160.98 
  -9   3   0 1055.89  132.59 
  -3  -9   0 1208.48  151.38 
   9  -3   0 1262.97  122.79 
  -3  -9   0  902.31  125.99 
   9  -3   0  847.22  136.19 
  -3  -9   0 1145.39  133.89 
   3   9   0  912.01  133.39 
  -3  -9   0 1213.58  125.99 
   9  -3   0 1120.59  123.89 
   3   9   0 1597.74  160.68 
   9  -3   0 1502.05  158.98 
   9  -3   0 1002.20  125.79 
   3   9   0 1244.98  136.49 
  -3  -9   0 1192.38  139.59 
  -9   3   0 1259.37  128.39 
   3   9   0 1266.97  127.99 
   9  -3   0 1252.97  125.99 
   4   9   0  229.68   58.19 
  -9   4   0  114.19   52.09 
   9  -4   0  161.38   55.69 
  -9   4   0  200.98   49.70 
  -9   4   0  280.67   52.89 
  -4  -9   0  195.68   52.49 
  -4  -9   0  254.27   73.69 
  -4  -9   0  110.49   47.30 
  -9   4   0  221.18   58.49 
  -9   4   0  155.08   64.39 
   9  -4   0  179.18   50.19 
   4   9   0  134.89   59.19 
   4   9   0  192.68   52.29 
  -9   4   0  237.88   58.99 
   9  -4   0  264.17   71.99 
   9  -4   0  166.28   45.90 
   4   9   0  293.47   65.39 
   9  -4   0  191.48   55.79 
  -9   4   0  306.97   69.29 
   9  -4   0  164.58   44.20 
   9  -4   0  182.78   68.19 
   4   9   0  327.97   72.09 
   4   9   0  281.37   63.79 
   9  -4   0  174.38   44.90 
  -4  -9   0  167.18   51.79 
  -9   4   0  266.17   58.49 
   4   9   0  139.29   48.70 
  -9   4   0  209.38   43.90 
  -4  -9   0  196.38   63.49 
  -4  -9   0  291.37   59.09 
   4   9   0  174.28   51.59 
  -4  -9   0  208.58   54.49 
  -4  -9   0  152.38   51.09 
  -4  -9   0  220.78   62.49 
  -4  -9   0  178.18   55.79 
  -4  -9   0  171.68   54.49 
   9  -4   0  222.18   76.59 
  -4  -9   0  136.99   56.49 
  -4  -9   0  277.57   59.59 
   9  -4   0   48.40   45.90 
  -9   4   0  102.09   46.70 
   4   9   0  300.37   63.09 
   9  -4   0  145.09   50.09 
   9  -4   0  161.68   53.59 
   9  -4   0  173.98   60.69 
   4   9   0  212.48   55.29 
   4   9   0  125.39   53.49 
   9  -4   0  142.99   48.20 
  -9   4   0  193.38   50.79 
  -4  -9   0  181.98   58.29 
  -4  -9   0  188.78   55.09 
   9  -5   0  257.57   60.09 
   9  -5   0  242.98   83.09 
   9  -5   0  370.66   77.79 
   5   9   0  174.18   53.59 
  -9   5   0  273.67   56.49 
   9  -5   0  127.89   49.99 
  -9   5   0  327.77   62.89 
   5   9   0  411.86   96.49 
  -9   5   0  233.78   69.99 
  -5  -9   0  296.77   71.39 
   9  -5   0  163.18   63.19 
   5   9   0  221.48   59.29 
  -5  -9   0  349.47   79.99 
  -9   5   0  382.56   84.39 
  -5  -9   0  171.18   58.99 
  -9   5   0  249.38   61.49 
   9  -5   0  238.68   73.19 
  -5  -9   0  321.47   73.59 
   9  -5   0  368.16   79.09 
  -5  -9   0  470.25   82.49 
   9  -5   0  291.57   58.09 
  -5  -9   0  256.67   63.99 
   5   9   0  272.37   63.89 
   5   9   0  280.97   65.39 
  -5  -9   0  216.88   67.39 
  -5  -9   0  239.98   61.39 
   5   9   0  376.96   76.09 
  -9   5   0  223.88   59.29 
  -9   5   0  224.78   70.79 
   9  -5   0  150.88   51.89 
  -9   5   0  269.27   63.59 
   5   9   0  231.08   59.69 
  -5  -9   0  204.98   59.39 
  -5  -9   0  392.56   90.79 
   5   9   0  275.47   66.49 
   9  -5   0  182.08   83.89 
   5   9   0  198.18   56.29 
  -5  -9   0  277.87   73.39 
  -9   5   0  151.38   55.89 
  -5  -9   0  146.59   59.09 
   9  -5   0  166.38   54.09 
   9  -5   0  406.56   78.69 
  -5  -9   0  216.88   60.19 
   5   9   0  465.75   80.69 
  -5  -9   0  324.67   66.49 
   5   9   0  268.47   79.59 
   5   9   0  231.58   69.99 
  -9   5   0  355.66   61.79 
   9  -5   0  227.58   81.29 
   9  -5   0  428.06   69.29 
  -6  -9   0 1254.87  154.48 
  -9   6   0 1528.45  178.18 
  -9   6   0 1474.15  159.08 
  -6  -9   0 1261.37  160.98 
   9  -6   0 1376.46  160.48 
  -9   6   0 1474.75  147.49 
   9  -6   0 1495.35  187.18 
  -9   6   0 1196.18  130.19 
   9  -6   0 1217.88  147.89 
  -6  -9   0 1121.99  149.88 
   9  -6   0 1306.27  154.08 
  -9   6   0 1178.58  162.18 
  -6  -9   0 1283.87  163.58 
   9  -6   0 1130.49  162.08 
  -6  -9   0 1427.86  155.48 
  -9   6   0 1330.67  168.08 
   9  -6   0  926.21  140.89 
   6   9   0 1711.73  167.38 
   6   9   0 1452.05  166.38 
   6   9   0 1474.95  159.58 
   9  -6   0 1267.77  184.38 
  -6  -9   0 1543.95  176.88 
   6   9   0 1332.17  149.39 
  -6  -9   0 1140.09  144.69 
  -6  -9   0 1269.77  169.58 
   6   9   0 1501.55  180.78 
   6   9   0 1449.06  157.08 
  -9   6   0 1259.27  145.49 
  -9   6   0 1122.39  137.79 
   9  -6   0 1360.86  140.09 
  -9   6   0 1266.17  151.58 
   9  -6   0 1366.26  138.59 
   6   9   0 1596.14  170.98 
  -6  -9   0 1163.78  164.78 
  -9   6   0 1363.26  148.99 
  -6  -9   0 1504.25  167.48 
   9  -6   0 1134.49  166.68 
  -6  -9   0 1296.87  157.48 
  -9   6   0  921.21  150.98 
   7   9   0  285.37   71.79 
   7   9   0  192.28   76.89 
   9  -7   0  212.58   81.39 
  -7  -9   0  225.08   72.89 
  -7  -9   0  268.17   73.29 
  -9   7   0  193.38   49.80 
  -7  -9   0  234.08   76.49 
  -7  -9   0  318.97   76.09 
   9  -7   0  287.07   73.69 
   7   9   0  220.48   62.99 
   9  -7   0  114.99   47.90 
  -9   7   0  214.68   77.99 
   7   9   0  396.56   91.99 
   9  -7   0  120.79   68.29 
   9  -7   0  217.68   78.09 
  -9   7   0  116.89   53.39 
  -7  -9   0  176.68   55.89 
  -7  -9   0  188.68   68.99 
  -9   7   0  188.48   78.49 
   9  -7   0  156.28   62.49 
   9  -7   0  268.97   69.49 
  -9   7   0  278.47   75.39 
  -7  -9   0  130.49   61.79 
   7   9   0  282.37   69.39 
  -7  -9   0  208.48   74.79 
  -9   7   0  176.28   56.09 
   7   9   0  170.38   63.19 
  -9   7   0  368.96   93.39 
  -9   7   0  185.78   59.59 
   7   9   0  194.78   63.49 
   9  -7   0  227.08   58.39 
  -7  -9   0  166.38   68.19 
  -7  -9   0  147.09   56.79 
   9  -8   0  297.87   89.89 
  -9   8   0  374.76  101.79 
   8   9   0  280.37   73.79 
   8   9   0  281.47   86.99 
   8   9   0  434.26   95.39 
  -9   8   0  124.89   80.29 
  -9   8   0  193.98   67.69 
  -8  -9   0  339.17   79.09 
   9  -8   0  209.98   80.69 
   9  -8   0  255.27   79.49 
  -9   8   0  329.87   79.29 
   9  -8   0  177.78   67.69 
  -8  -9   0  210.08   58.99 
  -8  -9   0  287.57   82.59 
  -9   8   0  291.67   67.49 
  -8  -9   0  280.07   81.29 
   9  -8   0  225.78   63.29 
   9  -8   0  181.88   63.89 
  -9   8   0  269.87   89.29 
  -8  -9   0  275.07   83.39 
  -8  -9   0  352.46   90.09 
   8   9   0  414.96   96.89 
   8   9   0  393.76   83.69 
  -8  -9   0  372.86   88.29 
   8   9   0  200.58   63.99 
   9  -8   0  282.77   75.39 
   9  -8   0  506.35  122.29 
  -9   8   0  244.88   72.89 
  -8  -9   0  342.87   93.79 
   8   9   0  411.16   81.19 
  -8  -9   0  202.28   70.89 
  -9   9   0  349.57  100.59 
   9   9   0  214.48   85.89 
   9   9   0  152.68   60.89 
  -9   9   0   70.29   53.89 
  -9  -9   0  134.09   69.59 
   9  -9   0  165.98   84.09 
   9  -9   0  130.09   71.39 
  -9  -9   0  172.38   73.99 
   9   9   0  185.58   73.69 
   9  -9   0  314.77   81.79 
  -9  -9   0  157.08   66.89 
  -9   9   0  107.39   59.99 
   9   9   0  371.56   96.69 
  -9  -9   0  255.37   82.59 
   9  -9   0  119.39   54.79 
   9   9   0  287.97   77.19 
  -9  -9   0  238.38   81.09 
  -9  -9   0  249.18   80.49 
  -9   9   0  207.98   84.79 
   9   9   0  256.17   74.49 
  -9  -9   0  223.18   75.79 
  -9  -9   0  240.98   76.89 
  -9  -9   0  232.58   76.19 
   9  -9   0  153.08   68.09 
  -9   9   0   79.29   50.49 
  -9   9   0  146.59   76.49 
  10   8   0  979.90  146.59 
  10   8   0 1574.04  189.58 
  -8  10   0  931.31  144.49 
 -10  -8   0 1323.97  169.68 
  -8  10   0 1510.95  210.48 
   8 -10   0 1257.57  159.98 
 -10  -8   0  933.61  154.58 
   8 -10   0  909.21  169.68 
  10   8   0 1812.22  216.68 
   8 -10   0 1309.47  157.88 
   8 -10   0 1298.47  185.98 
  -8  10   0 1024.60  150.38 
 -10  -8   0 1304.97  167.18 
 -10  -8   0 1175.48  167.88 
  10   8   0 1083.39  154.18 
 -10  -8   0  970.90  147.59 
   8 -10   0 1412.66  184.98 
 -10  -8   0 1160.28  160.48 
 -10  -8   0 1284.27  170.48 
 -10  -8   0 1845.22  189.28 
  10   8   0 1418.06  168.28 
  -8  10   0 1318.27  179.88 
 -10  -8   0 1154.48  159.78 
  10   8   0 1874.51  211.98 
  -8  10   0 1231.18  155.28 
   8 -10   0 1151.98  163.98 
 -10  -8   0 1011.00  151.38 
  10   7   0  148.79   71.09 
 -10  -7   0  162.98   65.89 
  10   7   0  158.48   56.19 
 -10  -7   0   80.39   51.69 
 -10  -7   0  195.08   71.99 
  10   7   0  261.07   76.69 
 -10  -7   0  185.18   62.59 
   7 -10   0  187.98   62.49 
 -10  -7   0  250.37   72.99 
  10   7   0  161.88   55.69 
  -7  10   0  167.28   63.69 
  10   7   0  185.08   64.19 
   7 -10   0  207.08   64.29 
   7 -10   0  145.19   57.89 
 -10  -7   0  154.98   63.79 
 -10  -7   0  135.59   65.59 
 -10  -7   0  198.88   69.39 
  10   7   0  194.68   63.59 
   7 -10   0   87.49   67.19 
   7 -10   0  140.19  109.29 
  -7  10   0   88.49   54.49 
  -7  10   0  109.59   62.79 
 -10  -7   0  172.28   68.89 
  10   7   0  140.09   69.99 
  -7  10   0  274.27   86.39 
  -7  10   0   99.59   45.30 
   7 -10   0   74.39   59.79 
 -10  -7   0  154.68   66.29 
 -10  -7   0  203.48   61.99 
   7 -10   0  150.38   70.09 
   7 -10   0  163.58   65.69 
 -10  -7   0   63.69   48.00 
 -10  -7   0   19.40   47.30 
  10   7   0  181.58   62.69 
  10   6   0  438.16   98.89 
   6 -10   0  228.08   70.89 
  10   6   0  474.15   89.99 
   6 -10   0  385.76   78.89 
 -10  -6   0  303.57   86.99 
  -6  10   0  401.46   85.09 
   6 -10   0  494.95   81.09 
  10   6   0  402.56   74.59 
  10   6   0  384.86   78.69 
  -6  10   0  392.56   99.39 
   6 -10   0  403.26   81.69 
  10   6   0  405.66   87.59 
  10   6   0  436.46  108.39 
   6 -10   0  425.96   85.39 
   6 -10   0  388.16   94.09 
  10   6   0  337.37   75.09 
 -10  -6   0  482.05   93.69 
 -10  -6   0  401.16   89.09 
   6 -10   0  452.75   95.39 
 -10  -6   0  382.06   90.59 
  -6  10   0  429.26   95.59 
 -10  -6   0  261.97   81.39 
  -6  10   0  433.76   79.09 
  10   6   0  430.16   87.09 
 -10  -6   0  211.38   70.89 
 -10  -6   0  289.97   75.09 
 -10  -6   0  312.77   76.39 
 -10  -6   0  468.45   90.39 
  -6  10   0  433.46   80.89 
  -6  10   0  382.16   79.19 
 -10  -6   0  452.55   93.09 
   6 -10   0  546.85  115.89 
 -10  -6   0  516.15  102.99 
 -10  -6   0  500.95   95.59 
  -6  10   0  422.26   86.99 
 -10  -6   0  595.04  107.79 
  10   6   0  413.26   95.89 
   6 -10   0  447.56   95.19 
 -10  -6   0  251.17   68.39 
   5 -10   0  -13.40   38.80 
 -10  -5   0    0.80   35.00 
 -10  -5   0   24.50   41.30 
  -5  10   0   50.69   48.30 
  10   5   0  -14.30   30.30 
 -10  -5   0   32.90   40.00 
 -10  -5   0   22.00   41.90 
  10   5   0   45.60   47.20 
   5 -10   0    2.30   33.80 
 -10  -5   0  -54.29   31.50 
 -10  -5   0   47.50   41.60 
  -5  10   0   -3.40   29.60 
 -10  -5   0   -9.00   30.00 
   5 -10   0    4.10   44.20 
  10   5   0    0.20   27.30 
 -10  -5   0  -32.30   23.30 
  -5  10   0   -7.90   32.90 
  10   5   0    0.60   37.70 
  10   5   0    0.10   37.30 
  -5  10   0   -6.20   41.00 
  10   5   0   13.20   32.70 
 -10  -5   0   49.40   41.20 
 -10  -5   0   27.90   42.50 
   5 -10   0   38.60   48.10 
   5 -10   0  -17.50   30.50 
  10   5   0   10.40   27.90 
  10   5   0  -11.40   39.40 
  -5  10   0    1.00   51.79 
   5 -10   0   10.20   36.90 
  10   5   0   81.29   58.39 
  -5  10   0   15.30   40.00 
 -10  -5   0   27.60   39.20 
  10   5   0   -7.00   22.90 
   5 -10   0  107.39   50.59 
   5 -10   0   -4.10   32.40 
 -10  -5   0   -9.90   31.50 
   5 -10   0    2.80   41.50 
  10   5   0  -16.80   27.60 
 -10  -5   0   25.50   41.40 
   5 -10   0   53.39   46.80 
  -5  10   0   -4.90   26.00 
   5 -10   0  -24.40   29.70 
  -5  10   0   12.20   29.40 
 -10  -5   0    0.60   32.50 
  10   4   0    1.10   32.80 
 -10  -4   0   20.00   35.90 
  -4  10   0   21.50   41.30 
   4 -10   0  -14.80   34.30 
 -10  -4   0   63.69   39.20 
  -4  10   0  -12.50   20.60 
  10   4   0   35.10   44.70 
   4 -10   0   28.70   37.50 
   4 -10   0    3.40   31.30 
  10   4   0  113.99   45.50 
   4 -10   0    4.40   41.20 
 -10  -4   0   62.79   42.10 
  10   4   0   57.19   36.80 
   4 -10   0   33.80   45.60 
 -10  -4   0   87.99   45.00 
 -10  -4   0    0.70   35.40 
  10   4   0   18.30   42.10 
  10   4   0   29.30   32.40 
 -10  -4   0   44.30   45.90 
 -10  -4   0   -9.40   30.50 
  10   4   0   47.60   60.49 
 -10  -4   0  -16.00   35.60 
 -10  -4   0   36.40   36.00 
   4 -10   0   63.69   42.00 
   4 -10   0   45.40   32.60 
  10   4   0   14.90   41.30 
  10   4   0   28.90   30.00 
  -4  10   0   -4.70   26.80 
 -10  -4   0   -9.40   28.30 
 -10  -4   0   -0.90   30.30 
  10   4   0   -4.50   36.30 
  -4  10   0   43.00   43.10 
   4 -10   0   40.70   38.10 
  10   4   0   54.39   42.60 
   4 -10   0    1.60   27.70 
 -10  -4   0   23.10   39.80 
  -4  10   0   45.40   34.10 
  -4  10   0   17.40   36.90 
 -10  -4   0  -23.40   21.40 
   4 -10   0   65.79   47.00 
  -4  10   0    6.70   30.80 
  -4  10   0    4.70   45.60 
  10   4   0   49.10   31.70 
   4 -10   0  -15.70   35.30 
   3 -10   0  112.69   58.99 
 -10  -3   0   76.59   40.50 
  -3  10   0   44.10   30.20 
  10   3   0  165.38   55.29 
 -10  -3   0  115.59   43.10 
  10   3   0  178.58   57.89 
   3 -10   0  153.58   63.79 
 -10  -3   0   90.19   46.10 
   3 -10   0  118.49   47.20 
 -10  -3   0  168.98   56.99 
 -10  -3   0  105.59   49.90 
  10   3   0  110.59   44.40 
  10   3   0  122.59   53.99 
  10   3   0  214.28   69.69 
  10   3   0  129.39   53.19 
 -10  -3   0  151.88   57.79 
   3 -10   0  158.58   50.89 
   3 -10   0  205.98   52.39 
   3 -10   0  120.89   51.99 
   3 -10   0   90.19   50.09 
  10   3   0   66.89   38.50 
  10   3   0  151.88   54.39 
  -3  10   0  135.29   52.09 
  10   3   0  148.29   54.09 
   3 -10   0  254.87   59.39 
  -3  10   0  250.77   72.49 
  -3  10   0  117.29   43.10 
 -10  -3   0  141.39   53.89 
  10   3   0   95.69   70.89 
 -10  -3   0  142.09   47.50 
  -3  10   0   90.79   45.50 
  10   3   0  151.98   48.50 
  -3  10   0  106.39   58.09 
 -10  -3   0  185.18   61.29 
  -3  10   0  175.48   57.29 
   3 -10   0  103.49   47.90 
   3 -10   0   96.29   42.00 
 -10  -3   0   88.09   44.90 
   3 -10   0  106.39   39.60 
 -10  -3   0   93.69   48.90 
 -10  -3   0  147.09   54.79 
  10   3   0   26.60   37.30 
  10   3   0  126.49   46.40 
  -3  10   0  133.69   42.00 
  10   2   0  553.84   96.19 
   2 -10   0  669.03  109.59 
   2 -10   0  677.83  103.79 
   2 -10   0  807.02  124.59 
  -2  10   0  559.14  100.49 
 -10  -2   0  752.52  114.49 
 -10  -2   0  766.02  110.69 
  -2  10   0  748.43   96.99 
   2 -10   0  658.43   97.69 
   2 -10   0  656.03   90.99 
  -2  10   0  748.33  119.69 
  10   2   0  654.53  101.49 
   2 -10   0  678.93  103.29 
   2 -10   0  677.03   93.29 
 -10  -2   0  491.35   91.09 
  -2  10   0  574.54  114.99 
   2 -10   0  654.33  110.29 
  10   2   0  571.04   96.29 
  -2  10   0  598.44   92.39 
   2 -10   0  569.44   87.89 
 -10  -2   0  507.85   88.19 
  -2  10   0  895.21  120.59 
 -10  -2   0  788.52  119.59 
  10   2   0  725.43   97.09 
 -10  -2   0  611.24   92.79 
  10   2   0  634.64   95.09 
  10   2   0  746.93  105.19 
  10   2   0  525.15   99.09 
 -10  -2   0  577.54   97.29 
  10   2   0  728.53  116.49 
  10   2   0  542.55   98.89 
  -2  10   0  709.13  105.99 
 -10  -2   0  597.74   94.29 
  10   2   0  652.83   91.09 
 -10  -2   0  726.23   92.89 
   2 -10   0  675.33  102.59 
 -10  -2   0  824.42  119.49 
 -10  -2   0  679.03  111.69 
 -10  -2   0  779.02  114.09 
  10   2   0  519.15  124.79 
  10   2   0  707.43   96.29 
 -10  -2   0  772.02  116.99 
   1 -10   0  179.58   58.29 
 -10  -1   0  289.67   79.39 
   1 -10   0  155.08   53.29 
   1 -10   0  157.68   58.39 
 -10  -1   0  384.36   66.79 
 -10  -1   0  252.57   57.29 
   1 -10   0  438.06   86.49 
  10   1   0  226.08   56.49 
  -1  10   0  351.46   64.29 
  -1  10   0  506.75  103.29 
  -1  10   0  215.88   66.89 
 -10  -1   0  262.77   70.79 
  10   1   0  386.26   65.49 
  10   1   0  199.08   58.19 
   1 -10   0  312.47   60.49 
  10   1   0  235.38   60.59 
 -10  -1   0  311.57   70.79 
  10   1   0  257.97   67.99 
  10   1   0  262.17   57.39 
 -10  -1   0  227.48   66.59 
  10   1   0  299.47   62.89 
   1 -10   0  293.07   66.69 
   1 -10   0  410.86   81.19 
  10   1   0  268.67   91.09 
   1 -10   0  272.27   74.19 
 -10  -1   0  323.27   73.69 
  -1  10   0  274.97   64.79 
  -1  10   0  205.58   56.29 
   1 -10   0  219.68   53.59 
 -10  -1   0  364.36   65.99 
  10   1   0  222.68   62.99 
   1 -10   0  241.18   56.99 
  -1  10   0  426.66   84.69 
  10   1   0  353.76   71.49 
 -10  -1   0  300.17   63.69 
 -10  -1   0  304.07   72.49 
  -1  10   0  350.06   76.19 
  10   1   0  242.88   70.69 
 -10  -1   0  265.07   65.79 
 -10  -1   0  325.07   68.79 
 -10  -1   0  280.37   71.89 
  10   1   0  371.76   72.19 
  10   1   0  272.17   67.19 
   1 -10   0  209.28   57.39 
 -10   0   0 1342.17  168.98 
 -10   0   0 1057.89  126.89 
   0  10   0 1232.08  130.69 
  10   0   0 1191.68  186.18 
  10   0   0 1292.77  156.38 
   0 -10   0 1104.39  127.09 
   0 -10   0  975.50  142.89 
 -10   0   0 1190.28  147.39 
   0  10   0 1032.50  131.19 
   0 -10   0 1518.05  156.78 
  10   0   0 1195.98  139.59 
   0 -10   0 1307.07  138.99 
   0 -10   0 1084.39  148.29 
 -10   0   0 1399.96  152.48 
 -10   0   0 1134.99  138.79 
   0 -10   0 1427.16  142.89 
  10   0   0 1295.67  162.78 
  10   0   0 1084.29  127.19 
   0 -10   0 1030.30  145.09 
   0 -10   0 1138.69  145.79 
  10   0   0  960.60  128.59 
 -10   0   0 1177.28  139.09 
 -10   0   0 1227.48  155.28 
   0  10   0  968.30  142.19 
  10   0   0 1361.76  129.29 
 -10   0   0 1161.68  139.49 
   0 -10   0  946.31  132.29 
  10   0   0 1241.68  134.69 
  10   0   0 1257.27  144.59 
   0  10   0 1057.29  137.09 
   0 -10   0 1097.59  143.09 
 -10   0   0 1121.89  140.69 
 -10   0   0 1191.08  137.09 
  10   0   0 1376.06  143.59 
  10   0   0 1167.38  142.69 
   0  10   0 1112.49  147.79 
 -10   0   0 1115.39  131.69 
   0  10   0 1258.77  164.38 
   0 -10   0 1134.19  136.19 
   0 -10   0 1020.30  137.39 
   1  10   0  347.57   69.69 
  -1 -10   0  237.68   70.29 
  10  -1   0  263.87   62.39 
  10  -1   0  329.67   72.59 
 -10   1   0  386.66   77.49 
  10  -1   0  329.07   80.59 
   1  10   0  367.56   80.79 
  -1 -10   0  276.27   61.39 
 -10   1   0  464.05   84.49 
   1  10   0  365.86   87.59 
  10  -1   0  339.17   72.39 
  -1 -10   0  302.67   69.49 
  -1 -10   0  272.47   65.09 
  10  -1   0  324.87  100.59 
  10  -1   0  290.87   76.19 
   1  10   0  301.77   78.49 
  10  -1   0  293.17   62.19 
 -10   1   0  340.67   70.89 
  -1 -10   0  341.87   79.89 
  -1 -10   0  394.76   76.49 
   1  10   0  345.57   70.19 
  -1 -10   0  255.77   74.49 
  10  -1   0  371.96   72.29 
  -1 -10   0  310.47   70.59 
 -10   1   0  270.77   67.99 
 -10   1   0  277.87   67.39 
  10  -1   0  311.57   66.09 
 -10   1   0  287.67   62.89 
   1  10   0  251.47   61.99 
 -10   1   0  248.68   56.49 
 -10   1   0  353.86   70.29 
  -1 -10   0  357.26   68.09 
  -1 -10   0  235.68   66.49 
  -1 -10   0  371.96   65.89 
   1  10   0  259.37   59.39 
  10  -1   0  523.45   98.29 
 -10   1   0  243.48   60.59 
 -10   1   0  207.08   59.49 
 -10   1   0  371.16   87.29 
  10  -1   0  276.77   64.09 
  -1 -10   0  333.17   76.59 
  10  -1   0  345.17   69.09 
   1  10   0  162.38   55.59 
 -10   1   0  271.87   57.99 
  10  -1   0  389.46   72.59 
  -2 -10   0  731.13  119.49 
 -10   2   0  622.24   91.69 
 -10   2   0  798.22  109.39 
  -2 -10   0  761.12   98.09 
  10  -2   0  540.05   88.39 
   2  10   0  688.93  109.59 
   2  10   0  628.94  111.39 
  10  -2   0  734.13  140.39 
  10  -2   0  728.93  105.49 
  10  -2   0  699.43  101.69 
 -10   2   0  626.14   96.29 
   2  10   0  661.83   95.89 
  -2 -10   0  852.11  113.19 
  10  -2   0  784.92  121.29 
  10  -2   0  590.84   97.49 
  10  -2   0  643.94   94.29 
  10  -2   0  693.33  104.09 
 -10   2   0  424.86   86.29 
  10  -2   0  753.42  122.19 
  10  -2   0  688.43  118.99 
  -2 -10   0  654.33   94.59 
   2  10   0  642.24  105.49 
  -2 -10   0  766.22  103.99 
  -2 -10   0  731.13  102.49 
  -2 -10   0  656.03  103.69 
   2  10   0  593.74   93.69 
 -10   2   0  706.13   92.19 
  10  -2   0  837.12  104.79 
 -10   2   0  704.03   90.59 
  -2 -10   0  634.44  103.29 
   2  10   0  629.04   96.79 
  -2 -10   0  582.64   98.09 
  -2 -10   0  727.13  103.89 
  -2 -10   0  586.74  107.59 
   2  10   0  926.61  135.99 
 -10   2   0  682.63  102.89 
   2  10   0  582.54   94.99 
  10  -2   0  468.15   90.69 
 -10   2   0  621.84  106.19 
 -10   2   0  523.25   91.29 
  -2 -10   0  667.93  106.49 
  -2 -10   0  705.03  120.79 
 -10   2   0  780.52  106.59 
  10  -2   0  660.83  100.89 
   2  10   0  646.24  105.89 
 -10   2   0  690.33  118.69 
 -10   2   0  786.42  103.29 
   2  10   0  807.22  118.09 
  -3 -10   0  141.19   50.59 
  10  -3   0  138.29   69.59 
 -10   3   0  138.79   52.09 
 -10   3   0  181.68   59.39 
  -3 -10   0   40.50   41.00 
   3  10   0  128.99   47.00 
  -3 -10   0  125.39   55.39 
 -10   3   0   95.09   42.00 
 -10   3   0  118.09   49.60 
  -3 -10   0  120.29   46.80 
   3  10   0   94.89   44.00 
  10  -3   0  160.68   54.79 
 -10   3   0  177.98   55.19 
  10  -3   0   76.09   48.30 
  10  -3   0   94.49   43.20 
  10  -3   0  134.99   51.29 
 -10   3   0  137.59   49.40 
  -3 -10   0  257.07   60.09 
 -10   3   0  114.39   39.40 
   3  10   0  177.38   55.19 
  10  -3   0  238.48   85.99 
  -3 -10   0  101.69   49.90 
 -10   3   0  204.18   66.39 
   3  10   0  157.18   59.29 
  -3 -10   0  118.89   48.50 
  -3 -10   0   50.19   42.80 
  -3 -10   0  123.89   58.39 
   3  10   0   97.69   57.59 
  10  -3   0   61.49   43.10 
  10  -3   0  153.38   53.29 
 -10   3   0   66.09   35.90 
   3  10   0  203.88   51.99 
  -3 -10   0  201.08   57.49 
   3  10   0  196.08   61.09 
  -3 -10   0  243.28   65.49 
  10  -3   0  178.78   52.09 
 -10   3   0  159.08   54.39 
   3  10   0  143.59   56.39 
   3  10   0  111.19   51.59 
  10  -3   0   77.79   36.70 
  -3 -10   0   81.79   47.20 
  10  -3   0  104.59   60.49 
  10  -3   0  144.59   58.19 
  10  -3   0   33.00   32.90 
   3  10   0   67.79   43.90 
 -10   3   0   89.59   39.50 
  10  -4   0   51.79   48.30 
  10  -4   0    4.10   28.60 
   4  10   0   86.09   47.30 
  10  -4   0  -15.90   34.80 
  -4 -10   0   21.50   35.00 
 -10   4   0   15.90   48.30 
   4  10   0   -6.30   34.70 
  10  -4   0   -6.40   30.30 
   4  10   0   -9.70   31.60 
  -4 -10   0  -35.20   27.50 
 -10   4   0   12.40   37.60 
  10  -4   0   70.79   44.90 
 -10   4   0    4.10   37.90 
 -10   4   0  -18.30   28.20 
 -10   4   0    3.70   33.40 
  -4 -10   0   -4.10   29.10 
   4  10   0   24.60   37.50 
  -4 -10   0   22.50   32.60 
  10  -4   0   10.80   33.10 
 -10   4   0   57.79   35.90 
  10  -4   0  -15.10   25.70 
  -4 -10   0   -2.70   31.80 
  10  -4   0   82.39   52.89 
  -4 -10   0    8.90   31.50 
   4  10   0   39.90   51.79 
  -4 -10   0   24.20   33.30 
   4  10   0    9.70   39.20 
  10  -4   0   66.19   54.79 
  -4 -10   0   20.70   41.30 
  -4 -10   0   28.40   38.10 
   4  10   0   55.59   38.30 
  10  -4   0   27.80   47.10 
  -4 -10   0   16.00   30.90 
  10  -4   0  -13.00   40.50 
 -10   4   0    3.90   36.20 
  -4 -10   0    9.70   37.30 
  -4 -10   0   75.49   48.20 
 -10   4   0   41.80   30.50 
 -10   4   0   63.09   37.40 
  10  -4   0   83.29   53.69 
   4  10   0   32.50   30.60 
 -10   4   0   53.79   42.50 
  -4 -10   0   37.50   41.80 
   5  10   0  -59.29   21.20 
  -5 -10   0  -16.50   39.60 
  -5 -10   0   52.39   41.40 
  -5 -10   0  -24.60   36.70 
   5  10   0  -46.80   30.60 
 -10   5   0  -12.70   26.70 
   5  10   0   26.80   40.00 
  10  -5   0   -7.50   30.80 
 -10   5   0   -0.60   30.70 
  10  -5   0    5.40   31.00 
  -5 -10   0  -51.29   26.00 
   5  10   0   12.20   34.30 
  -5 -10   0  -28.70   29.90 
  -5 -10   0   -1.00   31.10 
 -10   5   0  -55.29   34.00 
  10  -5   0   40.00   39.40 
 -10   5   0  -39.90   24.60 
  -5 -10   0    9.00   38.90 
 -10   5   0   -9.10   40.30 
  10  -5   0   18.10   45.60 
   5  10   0  -12.20   29.70 
  10  -5   0  110.19   55.79 
  -5 -10   0   68.79   51.69 
 -10   5   0    9.90   32.80 
 -10   5   0   -3.50   31.00 
  10  -5   0  -13.40   47.00 
 -10   5   0   23.80   41.20 
  10  -5   0   26.10   52.49 
  -5 -10   0   29.70   39.80 
  10  -5   0  -10.70   34.60 
  10  -5   0   11.60   39.80 
  10  -5   0   28.20   57.99 
   5  10   0   66.19   49.50 
  10  -5   0   35.40   45.00 
  -5 -10   0   59.39   43.30 
  -5 -10   0  -22.20   26.20 
  -5 -10   0   49.10   45.50 
   5  10   0   11.80   31.10 
 -10   5   0  -26.80   29.70 
 -10   6   0  288.77   65.99 
  10  -6   0  480.95   89.09 
  10  -6   0  335.47   84.89 
 -10   6   0  773.92  127.69 
  10  -6   0  496.45  118.79 
  -6 -10   0  359.76   82.79 
  -6 -10   0  408.86   95.39 
  -6 -10   0  319.77   86.09 
  10  -6   0  537.45   83.59 
 -10   6   0  353.86   78.39 
 -10   6   0  624.64  100.09 
   6  10   0  279.47   75.59 
  10  -6   0  723.83  129.29 
  -6 -10   0  416.86   82.19 
  -6 -10   0  383.16   90.89 
 -10   6   0  508.85  108.79 
  10  -6   0  574.64  118.79 
  -6 -10   0  411.86   88.09 
  -6 -10   0  503.25   96.79 
   6  10   0  345.17   95.89 
  -6 -10   0  427.16   91.99 
  10  -6   0  610.24  125.69 
  -6 -10   0  343.07   78.99 
  -6 -10   0  380.66   96.09 
  10  -6   0  360.06   86.69 
   6  10   0  391.16   82.49 
   6  10   0  484.75   91.19 
 -10   6   0  477.45  102.69 
 -10   6   0  421.96   86.89 
  10  -7   0  134.29   76.79 
  -7 -10   0  109.19   55.09 
 -10   7   0  102.89   56.29 
  -7 -10   0  124.59   70.19 
   7  10   0  113.59   53.59 
  10  -7   0  162.48   65.29 
   7  10   0   93.39   52.99 
  10  -7   0  124.89   54.99 
  -7 -10   0  177.48   67.09 
   7  10   0  113.69   63.69 
   7  10   0  113.89   57.79 
   7  10   0   66.49   68.79 
  -7 -10   0  182.98   71.59 
 -10   7   0  145.79   77.09 
 -10   7   0   91.49   67.69 
 -10   7   0  199.28   67.79 
  -7 -10   0  151.48   68.99 
 -10   7   0  139.19   67.59 
  10  -7   0   93.89   57.39 
 -10   7   0  138.19   51.89 
  10  -7   0   15.70   33.70 
  10  -7   0  136.99   64.29 
  -7 -10   0  124.39   60.39 
  -7 -10   0  143.49   60.69 
  10  -7   0  133.69   69.89 
  -7 -10   0   58.69   56.89 
  -8 -10   0 1134.29  163.48 
  10  -8   0 1105.69  149.69 
 -10   8   0 1494.35  192.08 
  -8 -10   0 1200.08  149.99 
  10  -8   0 1007.00  164.98 
  10  -8   0 1287.17  186.88 
   8  10   0 1577.84  178.98 
 -10   8   0 1421.56  182.78 
   8  10   0 1551.04  173.88 
  -8 -10   0 1006.00  152.58 
   8  10   0 1535.45  197.78 
  -8 -10   0 1399.06  173.48 
 -10   8   0  593.94  125.89 
 -10   8   0 1144.59  177.88 
  -8 -10   0 1490.55  184.28 
   8  10   0 1378.46  190.38 
   8  10   0 1272.17  159.08 
  -8 -10   0  941.01  157.78 
  10  -8   0 1527.25  198.98 
 -10   8   0  783.92  136.79 
  -8 -10   0 1302.57  177.18 
 -10   8   0 1242.98  146.09 
  10  -8   0 1192.58  157.58 
  -8 -10   0 1477.75  190.38 
  10  -8   0 1234.08  147.79 
  10  -8   0  926.51  178.78 
  11   7   0   21.10   56.69 
  11   7   0    4.80   57.09 
 -11  -7   0   34.50   55.29 
  11   7   0   77.29   55.69 
 -11  -7   0   66.59   50.29 
 -11  -7   0   -7.50   47.80 
   7 -11   0   56.99   44.90 
  11   7   0  -29.90   63.19 
   7 -11   0  -31.70   39.40 
 -11  -7   0  -24.60   44.60 
  -7  11   0   -4.20   58.29 
 -11  -7   0  -31.90   44.80 
 -11  -7   0  -11.80   50.59 
  -7  11   0   56.19   44.10 
  11   7   0   -8.00   37.50 
 -11  -7   0   55.69   59.89 
 -11  -7   0  -50.79   40.30 
  -7  11   0   -4.40   46.50 
  11   7   0   23.70   41.30 
 -11  -7   0   14.60   40.70 
 -11  -7   0   89.69   53.49 
  -7  11   0   -3.00   44.50 
   7 -11   0   57.49   56.19 
  -7  11   0   -1.70   55.09 
   7 -11   0  106.79   75.49 
   7 -11   0    4.20   57.59 
   7 -11   0   -2.80   45.50 
  11   7   0   33.00   44.00 
 -11  -7   0  -10.90   48.20 
 -11  -7   0  -10.40   44.20 
 -11  -6   0  294.87   78.39 
  11   6   0  292.57   75.99 
  -6  11   0  230.98   86.49 
 -11  -6   0  265.47   72.09 
   6 -11   0  187.28   69.69 
  11   6   0  196.68   69.09 
 -11  -6   0  216.58   75.39 
 -11  -6   0  246.98   74.49 
   6 -11   0  156.28   58.69 
 -11  -6   0  261.77   68.89 
  11   6   0  126.49   48.90 
  11   6   0  344.27   97.69 
   6 -11   0  285.87   84.79 
 -11  -6   0  251.97   77.79 
 -11  -6   0  188.98   70.09 
  11   6   0  239.88   91.09 
  11   6   0  112.99   58.89 
  11   6   0  274.47   72.79 
 -11  -6   0  237.88   83.69 
 -11  -6   0  168.48   65.89 
  11   6   0  158.68   73.19 
   6 -11   0  112.39   66.99 
  -6  11   0  277.17   67.09 
 -11  -6   0  321.27   86.89 
   6 -11   0   97.49   55.39 
  -6  11   0  287.27   80.49 
 -11  -6   0  128.29   67.79 
  11   6   0  290.87   73.89 
  -6  11   0  175.98   63.29 
   6 -11   0  218.28   82.49 
   6 -11   0  223.98   81.89 
  -6  11   0  202.08   85.19 
 -11  -6   0  129.29   65.39 
  11   5   0 1353.96  162.28 
 -11  -5   0 1103.39  156.08 
   5 -11   0  956.40  137.99 
  -5  11   0 1111.29  137.89 
   5 -11   0 1149.98  157.58 
 -11  -5   0 1232.78  155.28 
   5 -11   0 1361.86  149.69 
   5 -11   0 1201.68  172.68 
  11   5   0 1209.08  150.48 
 -11  -5   0 1252.37  162.38 
  -5  11   0 1045.00  181.48 
 -11  -5   0 1274.57  173.68 
  11   5   0 1192.28  158.78 
   5 -11   0 1293.17  209.38 
 -11  -5   0 1280.67  166.98 
  11   5   0 1508.15  181.88 
  11   5   0 1433.76  164.28 
  11   5   0 1597.14  195.38 
 -11  -5   0 1106.09  152.18 
  11   5   0 1050.19  135.69 
 -11  -5   0  976.40  147.09 
  11   5   0 1278.77  153.58 
  -5  11   0 1193.08  167.98 
   5 -11   0 1548.74  185.78 
 -11  -5   0 1125.89  163.68 
  -5  11   0 1223.78  145.39 
  11   5   0 1298.37  153.88 
   5 -11   0 1156.38  155.88 
 -11  -5   0 1233.18  156.98 
  11   5   0 1181.98  183.18 
 -11  -5   0 1389.66  166.98 
 -11  -5   0 1280.77  160.18 
   5 -11   0 1195.28  163.78 
   5 -11   0 1298.47  159.68 
  11   5   0 1028.00  139.99 
  -5  11   0 1481.25  173.08 
   5 -11   0 1437.96  176.28 
 -11  -5   0 1141.29  157.78 
 -11  -5   0 1303.67  173.18 
  -5  11   0 1307.97  162.78 
  11   4   0   79.29   60.29 
 -11  -4   0   26.90   44.30 
 -11  -4   0   44.40   43.20 
  11   4   0   32.80   31.90 
  11   4   0   42.10   41.50 
 -11  -4   0   84.39   53.29 
 -11  -4   0   47.70   44.10 
  -4  11   0   56.49   41.80 
  11   4   0   -7.60   37.20 
 -11  -4   0  102.99   57.69 
  11   4   0   94.79   67.39 
   4 -11   0   34.50   48.80 
   4 -11   0  115.79   50.89 
   4 -11   0  106.09   56.99 
   4 -11   0   43.30   46.40 
   4 -11   0    3.20   30.40 
  11   4   0   67.99   47.20 
  11   4   0   41.70   46.10 
   4 -11   0   25.90   52.49 
  11   4   0  126.09   53.19 
 -11  -4   0   69.79   52.39 
  -4  11   0  141.59   64.59 
  -4  11   0   41.90   56.89 
  -4  11   0  220.78   72.49 
   4 -11   0   14.20   37.40 
 -11  -4   0  -23.20   45.00 
 -11  -4   0  130.09   56.39 
  -4  11   0   50.59   41.80 
  -4  11   0   56.39   48.90 
 -11  -4   0   63.59   49.10 
 -11  -4   0    9.30   42.70 
  11   4   0   28.30   36.10 
   4 -11   0   63.99   41.70 
  11   4   0   34.40   41.90 
  11   4   0   -7.00   45.10 
 -11  -4   0   58.49   48.10 
 -11  -4   0   45.60   46.20 
  11   4   0   68.79   49.60 
  -3  11   0   31.80   49.30 
   3 -11   0   63.89   49.40 
   3 -11   0   45.60   38.20 
   3 -11   0   99.49   46.50 
  11   3   0   61.29   69.89 
  11   3   0  137.89   58.69 
  11   3   0  -44.60   31.90 
  11   3   0   18.90   38.60 
   3 -11   0   70.79   48.80 
 -11  -3   0   37.10   43.70 
 -11  -3   0   78.29   44.80 
   3 -11   0   65.69   50.69 
   3 -11   0   39.20   36.10 
  -3  11   0   -4.00   32.80 
  11   3   0   53.89   40.00 
  11   3   0   45.50   38.70 
 -11  -3   0   37.00   39.40 
 -11  -3   0   43.80   44.60 
  11   3   0   -1.30   38.30 
 -11  -3   0  109.89   52.29 
  11   3   0   15.80   41.80 
 -11  -3   0   71.39   53.19 
  11   3   0    2.80   29.90 
  -3  11   0  -22.10   41.80 
 -11  -3   0   47.60   44.60 
 -11  -3   0   55.39   39.40 
  11   3   0   61.39   36.90 
   3 -11   0   61.89   39.60 
   3 -11   0  107.59   62.39 
  11   3   0   39.90   38.10 
 -11  -3   0  127.69   54.99 
  11   3   0  113.89   52.29 
 -11  -3   0   15.60   38.70 
 -11  -3   0   42.10   43.20 
  -3  11   0   65.39   55.09 
  -3  11   0   -0.30   37.60 
  -3  11   0  123.69   57.99 
  11   2   0  434.36   79.89 
 -11  -2   0  630.94  100.79 
  -2  11   0  419.16   86.09 
   2 -11   0  485.35   99.99 
  11   2   0  339.47   78.39 
 -11  -2   0  414.26   85.29 
  11   2   0  527.25  100.19 
   2 -11   0  551.64  105.29 
  11   2   0  605.54  133.29 
 -11  -2   0  430.16   93.69 
  -2  11   0  448.86  111.89 
 -11  -2   0  340.67   88.59 
  -2  11   0  428.46   79.19 
   2 -11   0  364.86   72.99 
  11   2   0  471.85   88.99 
  11   2   0  410.76   83.29 
   2 -11   0  607.74   89.49 
 -11  -2   0  386.96   91.69 
  11   2   0  485.45   89.49 
 -11  -2   0  452.95   81.79 
 -11  -2   0  561.44   99.49 
   2 -11   0  488.55   98.09 
   2 -11   0  419.96   76.99 
  11   2   0  485.45   83.29 
  -2  11   0  587.74  117.19 
 -11  -2   0  559.44  107.79 
 -11  -2   0  498.25   98.69 
 -11  -2   0  461.45   95.39 
  11   2   0  404.46   86.39 
   2 -11   0  367.46   83.29 
  11   2   0  431.66   97.59 
  -2  11   0  484.95   97.29 
 -11  -2   0  347.57   82.19 
   2 -11   0  471.35   94.59 
  -2  11   0  317.57   84.49 
  11   2   0  573.74   91.79 
 -11  -2   0  349.77   78.19 
  11   2   0  474.75   93.19 
  -1  11   0  439.66   92.39 
  11   1   0  296.37   68.19 
  -1  11   0  512.35  113.89 
  11   1   0  274.87   80.89 
  11   1   0  420.26   82.59 
 -11  -1   0  355.26   86.99 
  -1  11   0  464.75   80.19 
 -11  -1   0  380.26   87.09 
 -11  -1   0  341.47   79.29 
 -11  -1   0  475.15   97.19 
  -1  11   0  478.95   94.79 
  11   1   0  457.95   88.69 
   1 -11   0  451.05   97.49 
  -1  11   0  383.06   84.29 
 -11  -1   0  420.66   95.69 
   1 -11   0  478.55   93.29 
   1 -11   0  311.07   77.19 
   1 -11   0  323.07   79.29 
 -11  -1   0  337.57   79.49 
   1 -11   0  304.77   80.69 
   1 -11   0  283.27   81.99 
   1 -11   0  263.97   66.39 
  11   1   0  459.05   90.49 
   1 -11   0  301.97   74.29 
 -11  -1   0  333.27   80.09 
   1 -11   0  365.46   71.79 
  11   1   0  343.57   80.09 
  11   1   0  340.97   71.89 
  11   1   0  476.55   89.79 
 -11  -1   0  421.06   77.19 
   1 -11   0  402.26   92.69 
  11   1   0  525.65   99.59 
   1 -11   0  411.16   76.09 
  11   1   0  455.25   78.69 
  -1  11   0  456.95  102.99 
 -11  -1   0  312.77   74.49 
 -11  -1   0  363.96   82.69 
  11   1   0  379.26  114.79 
 -11   0   0  154.58   57.69 
   0  11   0    2.80   37.40 
 -11   0   0   26.50   47.40 
 -11   0   0    5.00   34.80 
 -11   0   0    6.00   29.20 
   0 -11   0   43.00   44.00 
  11   0   0    3.90   37.90 
   0 -11   0   12.30   31.10 
 -11   0   0    7.50   29.40 
 -11   0   0  -18.40   27.70 
   0 -11   0   36.10   41.70 
   0  11   0   -8.80   29.90 
   0 -11   0   47.30   41.00 
 -11   0   0  -18.10   32.90 
  11   0   0   21.70   33.50 
   0  11   0  -69.79   21.50 
   0 -11   0  -26.50   27.90 
   0 -11   0   15.80   36.70 
  11   0   0   36.80   36.20 
 -11   0   0   23.10   38.60 
  11   0   0   20.00   36.00 
   0  11   0   21.70   44.90 
  11   0   0  -11.10   34.60 
  11   0   0  -34.50   22.90 
 -11   0   0    3.30   32.60 
   0 -11   0   15.70   35.20 
 -11   0   0   -9.10   33.30 
   0 -11   0  -20.70   30.80 
   0  11   0   16.80   49.99 
  11   0   0  -16.10   51.49 
   0 -11   0   23.50   40.50 
   0 -11   0  -12.80   30.20 
  11   0   0  -24.10   30.20 
   0 -11   0   15.10   34.90 
 -11   0   0    9.70   35.90 
  11   0   0   26.20   35.60 
  11   0   0  -13.90   29.00 
  11  -1   0  366.76  109.19 
 -11   1   0  497.75   92.19 
  11  -1   0  327.27   71.49 
 -11   1   0  387.56   84.79 
 -11   1   0  361.76   89.69 
 -11   1   0  400.46  100.49 
  -1 -11   0  414.76   82.39 
  -1 -11   0  349.57   89.99 
   1  11   0  355.26   91.09 
   1  11   0  389.36   89.69 
 -11   1   0  519.85   91.39 
  11  -1   0  343.47   73.69 
  11  -1   0  394.76   85.59 
 -11   1   0  485.25   93.39 
   1  11   0  519.45  124.99 
  11  -1   0  313.97   70.69 
   1  11   0  423.46   94.89 
 -11   1   0  394.76   80.09 
  11  -1   0  374.76   79.79 
  -1 -11   0  357.56   79.49 
 -11   1   0  342.17   74.39 
  -1 -11   0  575.34  103.09 
  -1 -11   0  331.77   70.39 
  -1 -11   0  562.44  108.59 
  -1 -11   0  340.87   81.09 
   1  11   0  313.77   76.99 
  -1 -11   0  303.97   78.09 
  11  -1   0  293.47   73.49 
 -11   1   0  409.36   83.29 
  11  -1   0  313.37   85.79 
  -1 -11   0  349.17   88.09 
 -11   1   0  444.56   92.89 
  -1 -11   0  264.87   72.59 
   1  11   0  527.25  102.59 
  11  -2   0  518.55   87.99 
   2  11   0  490.15   90.99 
 -11   2   0  346.17   70.39 
 -11   2   0  549.15   90.69 
  -2 -11   0  470.15   95.39 
 -11   2   0  434.26   95.09 
  11  -2   0  448.86   88.79 
  -2 -11   0  409.76   84.09 
 -11   2   0  598.94  101.69 
  11  -2   0  447.06   88.99 
  -2 -11   0  475.15  100.99 
   2  11   0  510.95  104.79 
  11  -2   0  498.75   96.49 
  11  -2   0  552.04   88.99 
  -2 -11   0  232.78   69.09 
   2  11   0  406.36   87.19 
  -2 -11   0  469.85   99.99 
   2  11   0  541.25  107.99 
 -11   2   0  316.37   77.29 
 -11   2   0  594.74   99.79 
  -2 -11   0  484.55  105.49 
  11  -2   0  407.26  115.99 
 -11   2   0  507.95  105.59 
  11  -2   0  340.57   77.79 
  -2 -11   0  442.46   89.69 
  -2 -11   0  512.05  103.69 
 -11   2   0  379.86   86.19 
  -2 -11   0  430.76   96.49 
  -2 -11   0  381.46   85.49 
  11  -2   0  546.05  110.19 
 -11   2   0  360.06   78.79 
   2  11   0  495.65  102.99 
  -3 -11   0   19.10   37.70 
 -11   3   0   50.59   39.70 
 -11   3   0   48.80   46.70 
 -11   3   0   44.90   42.30 
  11  -3   0   63.39   41.80 
  -3 -11   0   25.50   41.90 
  -3 -11   0   37.40   45.90 
  11  -3   0   61.59   47.50 
  11  -3   0    2.70   49.00 
  11  -3   0   52.19   53.19 
   3  11   0   46.20   46.70 
  -3 -11   0   28.90   40.60 
  11  -3   0   -9.50   41.30 
 -11   3   0    7.80   49.99 
  11  -3   0   73.79   44.40 
 -11   3   0   80.79   49.99 
 -11   3   0   77.99   39.00 
  11  -3   0   49.20   43.90 
  -3 -11   0  103.59   63.89 
   3  11   0   79.69   45.60 
  -3 -11   0   29.50   40.40 
  11  -3   0   10.80   37.10 
   3  11   0   99.09   47.00 
 -11   3   0   74.89   55.59 
   3  11   0   91.09   53.79 
  -3 -11   0   31.60   38.20 
 -11   3   0   88.09   45.70 
   3  11   0   68.69   45.60 
  11  -3   0   65.39   53.89 
  -3 -11   0   72.19   48.00 
  11  -3   0   71.49   47.00 
  -3 -11   0   79.99   54.59 
 -11   3   0   42.70   43.40 
 -11   3   0   46.50   34.40 
   3  11   0  -15.70   35.90 
  -3 -11   0  116.09   58.99 
  -4 -11   0   39.00   47.60 
  11  -4   0   57.89   45.70 
  11  -4   0   30.00   41.70 
   4  11   0   54.99   39.90 
  -4 -11   0   32.40   38.90 
 -11   4   0   56.69   49.20 
 -11   4   0   45.80   38.70 
 -11   4   0   58.99   48.70 
 -11   4   0   88.69   47.80 
  11  -4   0   42.10   62.29 
  11  -4   0  103.79   60.69 
  11  -4   0   55.99   53.29 
  11  -4   0   11.40   38.40 
 -11   4   0   53.59   40.30 
 -11   4   0   75.29   43.10 
   4  11   0   -9.70   33.70 
  -4 -11   0   57.39   56.79 
   4  11   0  104.59   54.89 
  -4 -11   0   72.89   52.59 
  -4 -11   0  102.59   55.69 
  11  -4   0  110.99   60.79 
  -4 -11   0   63.29   48.90 
   4  11   0   66.19   44.90 
  -4 -11   0   36.80   44.40 
 -11   4   0   96.69   63.89 
  -4 -11   0  122.59   62.29 
  11  -4   0  143.99   61.09 
   4  11   0   15.70   39.50 
   4  11   0  121.19   60.99 
 -11   4   0   22.40   42.30 
  -4 -11   0   62.69   48.80 
   4  11   0   44.50   54.49 
  11  -4   0   26.40   42.00 
  11  -5   0 1275.77  153.48 
   5  11   0 1729.23  181.68 
  -5 -11   0  980.20  148.39 
  11  -5   0 1253.67  172.18 
  11  -5   0 1632.54  185.08 
   5  11   0 1014.70  168.28 
 -11   5   0 1028.30  135.19 
 -11   5   0 1228.78  140.09 
  11  -5   0 1570.54  218.58 
 -11   5   0 1402.36  172.68 
 -11   5   0 1379.76  171.78 
 -11   5   0 1333.37  180.78 
  -5 -11   0 1130.39  164.18 
  11  -5   0 1234.38  158.98 
 -11   5   0 1420.56  168.88 
  11  -5   0 1240.68  161.18 
 -11   5   0 1308.67  169.08 
   5  11   0 1329.67  161.78 
  11  -5   0  765.92  157.18 
  -5 -11   0 1087.29  152.18 
   5  11   0 1487.25  164.98 
  11  -5   0 1060.99  165.28 
  -5 -11   0 1257.57  166.58 
  11  -5   0 1326.87  165.08 
  -5 -11   0 1350.26  165.58 
  -5 -11   0 1034.10  144.99 
  -5 -11   0 1042.40  167.28 
  -6 -11   0  416.46  106.39 
 -11   6   0  152.68   56.79 
 -11   6   0  238.18   76.59 
  -6 -11   0  148.89   70.39 
 -11   6   0  338.17   80.09 
  11  -6   0  180.88   67.79 
  -6 -11   0  164.58   67.79 
  11  -6   0  200.88   83.79 
  -6 -11   0  205.58   74.19 
  -6 -11   0  283.77   89.19 
   6  11   0  243.38   73.89 
  11  -6   0  207.08   92.69 
 -11   6   0  204.18   77.89 
 -11   6   0  165.08   60.89 
   6  11   0  172.48   86.69 
 -11   6   0  300.07   91.89 
  11  -6   0  309.07  102.39 
  -6 -11   0  249.97   84.99 
   6  11   0  181.58   65.39 
 -11   6   0  361.86  100.59 
   6  11   0  104.29   53.29 
  -6 -11   0  244.98   76.69 
  11  -6   0  167.98   64.19 
  11  -6   0  283.97   83.79 
 -11   7   0  -44.30   42.90 
  11  -7   0   -5.30   63.69 
 -11   7   0   35.20   60.19 
  -7 -11   0   -5.50   44.50 
  11  -7   0   32.90   68.89 
  -7 -11   0  -10.30   42.40 
  11  -7   0  -73.29   42.80 
  -7 -11   0  -47.00   41.40 
   7  11   0   60.39   53.49 
 -11   7   0    2.50   32.50 
  11  -7   0   -5.40   51.39 
  11  -7   0   42.90   61.29 
 -11   7   0  106.19   74.29 
  -7 -11   0   10.40   43.60 
 -11   7   0  -19.20   42.00 
   7  11   0   -6.20   61.49 
  -7 -11   0  -34.40   48.30 
   7  11   0   29.80   52.99 
   7  11   0   45.30   52.09 
  -7 -11   0  -18.10   42.20 
 -11   7   0    9.40   48.00 
  11  -7   0   18.50   41.40 
 -11   7   0   60.29   44.00 
   7  11   0   25.00   50.09 
  -7 -11   0   23.40   59.49 
  12   5   0  149.29   63.69 
  12   5   0   48.90   45.80 
   5 -12   0    5.20   47.10 
 -12  -5   0   62.89   57.39 
  -5  12   0   40.70   70.99 
 -12  -5   0   78.29   67.89 
  -5  12   0  113.49   59.99 
  12   5   0  178.68   84.39 
 -12  -5   0   58.59   50.49 
 -12  -5   0   27.30   49.40 
   5 -12   0   26.20   44.10 
  12   5   0  172.58   64.19 
 -12  -5   0  123.29   63.29 
  -5  12   0   89.49   74.59 
 -12  -5   0  -11.90   50.29 
   5 -12   0  123.69   75.29 
 -12  -5   0  124.79   59.49 
 -12  -5   0   19.30   47.30 
  12   5   0   96.09   54.99 
  -5  12   0   64.39   52.79 
  12   5   0   81.09   61.79 
  12   5   0   92.09   65.59 
  12   5   0  132.69   86.99 
  12   5   0   46.30   44.70 
 -12  -5   0   46.60   53.89 
 -12  -5   0  126.49   59.39 
  12   5   0   62.49   56.09 
 -12  -5   0   40.50   50.89 
 -12  -5   0  134.29   71.29 
 -12  -5   0    9.30   41.10 
  12   4   0  515.15  104.19 
   4 -12   0  679.03  120.89 
  -4  12   0  725.43  156.38 
  -4  12   0  619.74  113.39 
 -12  -4   0  567.74  110.09 
  12   4   0  409.76  103.29 
   4 -12   0  609.64  130.59 
 -12  -4   0  908.61  136.59 
 -12  -4   0  792.32  120.99 
 -12  -4   0  741.93  131.59 
 -12  -4   0  912.91  138.89 
 -12  -4   0  771.22  125.69 
  -4  12   0  523.45   99.59 
   4 -12   0  465.15   99.69 
   4 -12   0  654.73  103.99 
  12   4   0  612.84  142.49 
   4 -12   0  615.34  120.29 
  12   4   0  561.04  103.79 
  12   4   0  768.32  123.79 
 -12  -4   0  671.53  116.59 
  12   4   0  735.23  124.59 
   4 -12   0  563.14  112.69 
 -12  -4   0  713.33  127.59 
 -12  -4   0  721.53  120.59 
 -12  -4   0  464.45  102.89 
 -12  -4   0  586.34  117.19 
  12   4   0  572.54   99.69 
 -12  -4   0  689.23  128.29 
  -4  12   0  639.94  123.79 
  12   4   0  612.44  110.29 
  -4  12   0  886.81  149.19 
  12   4   0  620.34  106.79 
  12   3   0   72.09   54.09 
 -12  -3   0  164.38   71.39 
  -3  12   0  220.88   62.19 
 -12  -3   0  162.58   67.99 
  12   3   0   96.89   65.49 
  -3  12   0  253.57   81.99 
 -12  -3   0  235.78   79.49 
  -3  12   0  232.48   74.89 
 -12  -3   0  118.39   70.29 
   3 -12   0  198.58   85.09 
   3 -12   0  239.38   62.49 
   3 -12   0  280.97   88.79 
  -3  12   0  207.38   90.09 
  12   3   0  166.28   66.39 
 -12  -3   0  132.99   61.99 
  12   3   0   94.69   64.59 
   3 -12   0  173.18   71.39 
  12   3   0  230.48   67.39 
   3 -12   0  123.79   61.69 
 -12  -3   0  181.38   67.39 
  12   3   0  161.88   64.59 
  12   3   0  223.28   63.39 
  -3  12   0  153.28   70.59 
 -12  -3   0  189.88   65.29 
  12   3   0  157.08   62.49 
  12   3   0  131.49   92.49 
 -12  -3   0   50.29   53.29 
 -12  -3   0  180.58   74.09 
   3 -12   0  200.78   74.79 
  12   3   0  205.98   67.39 
 -12  -3   0  141.99   63.39 
 -12  -3   0  296.97   89.39 
 -12  -2   0  726.13  130.39 
   2 -12   0  464.05   99.39 
   2 -12   0  821.52  113.09 
  12   2   0  768.62  124.19 
  12   2   0 1151.48  185.78 
  12   2   0  839.22  129.29 
  -2  12   0  736.23  121.19 
  12   2   0  447.26  102.49 
 -12  -2   0  677.23  119.49 
 -12  -2   0  560.34  105.69 
   2 -12   0  759.32  139.09 
   2 -12   0  586.14  117.49 
   2 -12   0  782.22  134.09 
 -12  -2   0  934.61  137.69 
 -12  -2   0  561.34  109.99 
  12   2   0  739.63  110.39 
 -12  -2   0  718.33  124.09 
  -2  12   0  667.03  150.28 
   2 -12   0  825.12  142.89 
 -12  -2   0  666.73  112.49 
  -2  12   0  599.54  130.69 
   2 -12   0  633.84   97.79 
 -12  -2   0  864.01  130.39 
 -12  -2   0  845.12  131.09 
  12   2   0  700.53  114.99 
  12   2   0  767.62  123.69 
  -2  12   0  670.03  125.99 
  12   2   0  644.34  125.79 
  -2  12   0  811.52  149.49 
   1 -12   0   62.59   53.89 
 -12  -1   0  -55.49   34.90 
   1 -12   0  -17.30   41.10 
  -1  12   0  -29.90   45.90 
 -12  -1   0    3.20   35.60 
  12   1   0   -4.10   35.80 
  12   1   0   28.10   32.30 
  -1  12   0  -29.90   39.80 
   1 -12   0  -29.30   36.70 
   1 -12   0   24.10   40.20 
   1 -12   0   43.70   49.40 
  12   1   0  -27.70   36.10 
  12   1   0  -28.10   38.10 
  12   1   0  -33.70   60.59 
  -1  12   0  -27.30   49.50 
 -12  -1   0   -1.10   38.20 
  12   1   0   28.00   41.90 
 -12  -1   0  -21.30   39.20 
  12   1   0  -22.40   38.70 
 -12  -1   0   22.90   47.30 
   1 -12   0  -29.00   39.60 
  12   1   0   -3.60   32.20 
  -1  12   0   21.50   41.90 
 -12  -1   0   -5.90   30.20 
   1 -12   0   38.50   32.80 
 -12  -1   0    8.30   43.00 
 -12  -1   0    9.90   36.50 
 -12  -1   0    9.00   42.10 
   1 -12   0  -29.80   35.90 
   0 -12   0  134.99   66.19 
   0 -12   0  199.88   67.59 
   0  12   0  263.87   88.39 
   0  12   0   72.89   54.99 
 -12   0   0  133.59   57.39 
   0 -12   0  165.18   58.99 
  12   0   0  202.98   80.29 
  12   0   0   91.79   50.19 
   0 -12   0  110.19   48.50 
 -12   0   0   56.39   51.09 
   0 -12   0  121.49   58.09 
 -12   0   0   38.60   40.90 
 -12   0   0   65.69   45.20 
 -12   0   0  213.68   67.79 
  12   0   0  123.49   52.99 
   0 -12   0  112.99   62.29 
   0  12   0   88.59   60.59 
  12   0   0  263.87   74.89 
   0 -12   0   43.50   56.89 
   0  12   0   73.99   55.59 
 -12   0   0  184.98   72.19 
 -12   0   0  156.68   63.29 
  12   0   0  160.48   63.59 
   0  12   0  150.38   68.49 
 -12   0   0   85.19   51.89 
 -12   0   0  137.99   59.99 
  12   0   0  224.48   68.09 
   0 -12   0   45.50   48.60 
  12   0   0   91.19   54.49 
  12   0   0   85.69   75.39 
  12   0   0   43.30   51.39 
 -12   0   0  188.98   62.59 
  12  -1   0   28.80   37.40 
  -1 -12   0   -2.70   52.29 
   1  12   0  -11.70   40.20 
 -12   1   0  -18.10   32.80 
 -12   1   0   90.09   63.09 
   1  12   0    0.50   53.59 
  12  -1   0  -10.70   33.10 
  -1 -12   0   33.90   47.00 
  -1 -12   0  -17.10   38.40 
 -12   1   0   55.49   46.50 
  12  -1   0   15.10   32.20 
  -1 -12   0  -30.10   31.30 
  -1 -12   0    7.90   48.20 
  -1 -12   0   14.00   39.30 
 -12   1   0   75.29   46.60 
 -12   1   0  -37.60   34.50 
  12  -1   0   20.80   41.70 
  12  -1   0   42.10   51.09 
 -12   1   0  -13.80   36.40 
   1  12   0    7.20   37.30 
  12  -1   0   32.30   52.49 
  12  -1   0  -26.20   60.29 
  -1 -12   0  -38.40   40.50 
  -1 -12   0   16.20   36.80 
   1  12   0   37.40   52.69 
 -12   1   0  -35.80   34.90 
  12  -1   0   14.50   40.60 
  -1 -12   0  -13.00   32.40 
  12  -1   0   51.09   43.00 
 -12   1   0    8.30   40.00 
 -12   1   0   28.60   48.10 
  12  -2   0  855.71  119.99 
   2  12   0  559.64  109.59 
 -12   2   0  526.05  105.69 
   2  12   0  568.54  111.89 
 -12   2   0  635.34   99.09 
 -12   2   0  705.43  136.49 
  -2 -12   0  701.73  133.19 
  12  -2   0  557.14  103.49 
  12  -2   0  665.83  116.59 
  -2 -12   0  812.12  136.29 
  12  -2   0  670.13  107.19 
  12  -2   0  897.61  174.48 
   2  12   0  553.14  108.39 
  -2 -12   0  714.13  125.69 
  12  -2   0  652.03  115.49 
 -12   2   0  775.42  125.59 
 -12   2   0  733.23  120.39 
   2  12   0  838.22  135.79 
  12  -2   0  726.43  119.29 
  -2 -12   0  745.03  111.79 
 -12   2   0  642.54  106.39 
  -2 -12   0  518.45   91.99 
 -12   2   0  555.14  106.49 
 -12   2   0  734.13  133.09 
 -12   2   0  705.03  115.49 
  -2 -12   0  657.73  116.29 
  12  -2   0  571.64  122.69 
  -2 -12   0  559.74  110.29 
  -2 -12   0  587.54  109.99 
  -3 -12   0  147.19   66.59 
  -3 -12   0  203.08   75.49 
 -12   3   0  220.28   69.79 
  12  -3   0  155.08   62.79 
 -12   3   0  210.58   68.49 
  12  -3   0   95.89   70.79 
 -12   3   0  147.39   67.99 
 -12   3   0  301.17   81.99 
  12  -3   0  184.28   68.19 
 -12   3   0  326.07   78.49 
 -12   3   0  182.28   71.09 
   3  12   0  271.27   80.99 
  12  -3   0  162.78   63.39 
   3  12   0  187.68   69.59 
  -3 -12   0  293.57   78.29 
   3  12   0  245.38   84.99 
  -3 -12   0  243.68   78.29 
  -3 -12   0  216.58   78.89 
  12  -3   0  282.57   83.39 
   3  12   0  224.58   74.39 
  12  -3   0  190.08   75.59 
  -3 -12   0  175.08   77.29 
   3  12   0   68.29   56.59 
  -3 -12   0  199.08   77.29 
   4  12   0  706.13  124.29 
   4  12   0  687.83  116.09 
  -4 -12   0  644.34  137.49 
  -4 -12   0  453.55   97.49 
  -4 -12   0  449.56  107.69 
 -12   4   0  702.33  138.89 
 -12   4   0  420.66   86.19 
   4  12   0  718.23  119.09 
 -12   4   0  584.74  103.19 
 -12   4   0  665.43  121.69 
  -4 -12   0  567.74  111.09 
  -4 -12   0  838.62  128.19 
  -4 -12   0  531.35  112.89 
   4  12   0  535.75  115.79 
  12  -4   0  514.95  103.99 
 -12   4   0  826.52  126.79 
   4  12   0  689.43  133.19 
  12  -4   0  751.62  126.69 
  12  -4   0  471.55   95.29 
  -4 -12   0  489.75  141.89 
  12  -4   0  567.74  126.19 
   4  12   0  779.32  121.99 
  12  -4   0  742.13  161.28 
  -4 -12   0  815.82  127.09 
  12  -4   0  593.24  113.29 
 -12   4   0  806.92  133.69 
  12  -5   0   67.69   60.19 
   5  12   0  104.59   76.19 
 -12   5   0  125.59   52.49 
  12  -5   0  167.98   78.99 
  -5 -12   0  -45.50   45.50 
   5  12   0  219.78   78.39 
 -12   5   0  178.08   70.99 
 -12   5   0  157.28   66.79 
   5  12   0  118.19   65.59 
  -5 -12   0   97.59   61.99 
  -5 -12   0   95.89   67.39 
   5  12   0   73.49   57.69 
  -5 -12   0   -7.20   50.29 
 -12   5   0   55.99   40.80 
 -12   5   0  131.09   83.69 
  12  -5   0   18.90   42.60 
  12  -5   0  143.29   88.69 
  12  -5   0   37.40   73.49 
  12  -5   0  170.78   77.79 
  -5 -12   0   74.89   66.99 
  -5 -12   0  116.09   58.99 
  -5 -12   0    4.10   49.30 
  13   1   0  470.95  111.79 
   1 -13   0  584.64  113.39 
  -1  13   0  572.34  135.79 
 -13  -1   0  592.34  117.49 
 -13  -1   0  533.65  109.59 
  13   1   0  568.44  113.79 
   1 -13   0  513.65  114.89 
 -13  -1   0  559.34  112.19 
  -1  13   0  424.56  123.89 
 -13  -1   0  468.55  106.59 
   1 -13   0  588.84  109.79 
 -13  -1   0  564.84  103.99 
  -1  13   0  421.06  101.59 
   1 -13   0  391.66  102.09 
  13   1   0  535.75  107.89 
   1 -13   0  592.24  101.49 
  13   1   0  448.56   98.19 
 -13  -1   0  474.25  106.09 
 -13  -1   0  514.15  106.69 
  -1  13   0  530.35  119.39 
  13   1   0  748.93  162.88 
  13   1   0  318.47   81.09 
  13   1   0  426.06  102.49 
 -13  -1   0  558.44  114.09 
 -13  -1   0  622.64  116.59 
   0 -13   0    2.70   54.39 
   0 -13   0   87.39   51.19 
   0 -13   0   12.30   41.90 
  13   0   0   41.80   49.70 
  13   0   0   69.59   61.99 
 -13   0   0  -29.80   47.00 
 -13   0   0  -23.40   46.00 
  13   0   0  -35.30   63.59 
  13   0   0   28.00   55.19 
  13   0   0   -3.50   44.50 
  13   0   0    6.90   48.00 
   0  13   0  -24.40   52.79 
   0  13   0   15.80   65.59 
  13   0   0   11.80   46.10 
 -13   0   0   31.90   56.49 
 -13   0   0   38.50   46.40 
   0 -13   0   12.80   48.70 
   0  13   0   27.10   44.70 
 -13   0   0   22.50   49.20 
   0 -13   0   16.00   58.29 
   0  13   0    9.00   50.59 
 -13   0   0  -12.40   43.30 
 -13   0   0    3.70   42.00 
  13  -1   0  561.24  102.39 
  -1 -13   0  432.86  107.79 
  13  -1   0  543.65  106.59 
 -13   1   0  563.54  112.59 
   1  13   0  554.84  125.19 
  13  -1   0  310.37  100.19 
 -13   1   0  759.92  124.19 
  -1 -13   0  507.75  103.69 
 -13   1   0  432.56   95.19 
  13  -1   0  397.16  130.79 
 -13   1   0  589.94  124.09 
  -1 -13   0  477.85  115.19 
 -13   1   0  588.04  111.09 
  -1 -13   0  596.24  108.39 
  13  -1   0  508.75  106.99 
 -13   1   0  451.75  102.49 
  13  -1   0  420.66  101.29 
 -13   1   0  588.54  105.09 
  -1 -13   0  577.24  127.89 
  13  -1   0  439.66   98.59 
   1  13   0  397.76  102.99 
   1  13   0  753.92  144.19 
  13  -1   0  717.83  111.39 
 -13   1   0  648.04  121.79 
   0   0  -1    5.30    3.20 
   0   0  -1    7.60    3.80 
   0   0  -1    1.50    2.20 
   0   0  -1    8.60    3.40 
   0   0  -1    0.00    1.40 
   0   0  -1    0.60    2.40 
   0   0  -1    0.40    1.70 
   0   0  -1    3.00    2.60 
   0   0  -1    3.50    3.60 
   0   0  -1    6.30    3.00 
   0   0  -1    0.20    1.40 
   0   0  -1    5.90    2.80 
   0   0  -1    0.70    2.10 
   0   0  -1   28.90    5.90 
   0   0  -1   -1.20    1.50 
   0   0  -1   -0.80    1.10 
   0   0  -1    1.40    1.60 
   0   0  -1    1.90    2.30 
   0   0  -1   -0.20    1.20 
   0   0  -1   -0.50    1.50 
   0   0  -1    1.40    1.50 
   0   0   1    1.40    1.90 
   0   0   1    2.90    3.70 
   0   0   1   -0.70    1.20 
   0   0   1    5.60    2.00 
   0   0   1    1.00    1.60 
   0   0   1    2.90    1.80 
   0   0   1    6.00    1.90 
   0   0   1    7.90    4.00 
   0   0   1    3.90    2.10 
   0   0   1   -1.70    1.70 
   0   0   1    1.40    2.20 
   0   0   1    9.10    3.80 
   0   1  -1  247.18   19.30 
   0  -1  -1  253.87   21.80 
   1   0  -1  243.68   20.70 
   0  -1  -1  224.78   15.40 
   0   1  -1  237.58   20.40 
   0  -1  -1  234.88   18.40 
  -1   0  -1  231.58   19.20 
  -1   0  -1  257.07   19.30 
   0  -1  -1  229.88   17.10 
   1   0  -1  227.98   18.80 
  -1   0  -1  200.48   18.00 
   0   1  -1  236.78   25.90 
  -1   0  -1  246.78   18.60 
   0   1  -1  238.18   19.90 
   1   0  -1  255.27   18.40 
   0  -1  -1  247.68   17.60 
   1   0  -1  252.37   21.00 
   0  -1  -1  241.48   18.30 
   0  -1  -1  222.68   20.30 
   1   0  -1  244.88   24.00 
   0   1  -1  263.97   25.00 
   0   1  -1  207.08   20.10 
  -1   0  -1  247.78   18.70 
   0   1  -1  266.07   29.00 
   0  -1  -1  232.88   16.90 
   0   1  -1  231.28   20.20 
   1   0  -1  254.17   17.70 
  -1   0  -1  209.78   25.80 
  -1   0  -1  239.48   18.90 
  -1   0  -1  197.08   18.20 
   1   0  -1  235.48   21.60 
   0  -1  -1  232.68   18.60 
  -1   0  -1  243.28   19.80 
   1   0  -1  202.58   23.00 
   0   1  -1  208.28   26.00 
   0  -1  -1  242.18   21.30 
   1   0  -1  235.98   16.70 
   1   0  -1  222.88   24.00 
   1   0  -1  211.88   22.70 
   1   0  -1  229.08   24.60 
  -1   0  -1  240.98   19.20 
  -1   0  -1  277.97   28.60 
   1   0  -1  229.98   22.70 
  -1   0  -1  220.08   19.30 
  -1   0  -1  232.88   18.90 
   0  -1  -1  247.68   19.60 
   0  -1  -1  265.67   27.40 
   1   0  -1  229.08   23.40 
  -1   0  -1  248.68   27.20 
  -1   0  -1  207.08   24.80 
  -1   0  -1  229.78   17.50 
   0   1  -1  231.68   16.10 
   1   0  -1  251.37   16.80 
   1   0  -1  286.27   21.50 
  -1   0  -1  242.18   16.00 
   0  -1  -1  216.48   17.80 
   0   1  -1  259.87   18.60 
   1   0  -1  252.77   21.10 
   0   1  -1  219.18   20.20 
   0   1  -1  237.38   20.30 
   0  -1  -1  243.28   19.40 
   0  -1  -1  237.48   16.60 
   0  -1  -1  242.98   16.10 
  -1   0  -1  242.28   27.20 
   1   0  -1  204.18   22.80 
   1   0  -1  239.08   22.30 
   0  -1  -1  257.77   19.60 
   0   1  -1  252.97   25.70 
   0  -1  -1  266.57   19.60 
   0   1  -1  225.68   19.90 
   0  -1  -1  213.98   18.00 
   0   1  -1  241.78   20.40 
   0   1  -1  238.08   17.60 
   1   0  -1  263.37   26.40 
   1   0  -1  287.97   22.90 
   0  -1  -1  215.38   19.50 
   0   1  -1  229.58   20.20 
   0   1  -1  262.07   25.20 
   1   0  -1  245.98   21.10 
   0  -1  -1  243.08   19.10 
   0  -1  -1  242.08   19.10 
   1   0  -1  213.18   22.80 
  -1   0  -1  231.08   19.20 
  -1   0  -1  213.28   19.30 
   0   1  -1  262.97   25.60 
  -1   0  -1  236.88   20.00 
   0   1  -1  222.38   20.80 
   0   1  -1  224.58   19.70 
   0  -1  -1  216.78   20.90 
   1   0  -1  272.77   27.30 
   1   0  -1  234.18   23.70 
   0  -1  -1  223.88   18.80 
   0   1  -1  214.08   19.30 
   0   1  -1  241.88   21.00 
  -1   0  -1  214.98   25.30 
   0  -1  -1  245.78   17.90 
   1   0  -1  240.28   17.00 
   0   1  -1  236.28   23.20 
   0   1  -1  259.37   26.90 
   0  -1  -1  258.97   16.00 
   0   1  -1  251.37   23.10 
  -1   0  -1  227.08   19.00 
   0  -1  -1  237.28   18.60 
  -1   0  -1  238.98   18.70 
   0  -1  -1  235.48   18.20 
  -1   0  -1  218.88   19.10 
   0   1  -1  237.48   21.00 
   1   0   1  223.48   18.70 
   1   0   1  242.48   19.50 
   1   0   1  236.48   17.30 
   0  -1   1  224.98   18.50 
  -1   0   1  243.78   19.10 
   0  -1   1  229.98   16.00 
   0  -1   1  261.87   20.50 
  -1   0   1  242.68   17.20 
   0   1   1  234.28   18.20 
   1   0   1  219.58   18.30 
   0  -1   1  234.48   23.00 
   0  -1   1  235.68   20.80 
   1   0   1  172.38   18.40 
   1   0   1  176.28   24.20 
   1   0   1  263.97   19.30 
   1   0   1  256.27   19.20 
  -1   0   1  226.28   17.40 
  -1   0   1  260.17   21.90 
   0  -1   1  220.48   23.70 
   1   0   1  220.18   19.80 
   0  -1   1  227.48   20.10 
   1   0   1  230.88   19.30 
  -1   0   1  233.88   19.70 
   0  -1   1  270.57   25.50 
   0  -1   1  247.08   19.40 
   0  -1   1  226.68   19.50 
   0  -1   1  256.47   21.90 
  -1   0   1  233.48   17.80 
   0  -1   1  213.08   19.40 
   1   0   1  213.38   18.80 
   1   0   1  245.78   15.90 
   0   1   1  252.17   18.00 
   0  -1   1  243.18   21.00 
   0  -1   1  254.57   20.60 
   1   0   1  223.38   20.80 
  -1   0   1  245.88   25.40 
   0  -1   1  226.28   19.80 
   0   1   1  274.57   18.40 
   0  -1   1  214.48   24.00 
   0   1   1  242.48   19.60 
   0  -1   1  201.18   22.40 
   1   0   1  205.98   24.90 
   1   0   1  252.37   19.90 
   1   0   1  253.97   15.80 
  -1   0   1  241.88   20.10 
  -1   0   1  254.27   20.80 
   0  -1   1  255.97   20.80 
   0  -1   1  206.18   24.00 
  -1   0   1  271.87   21.30 
  -1   0   1  252.07   20.30 
   1   0   1  230.78   15.60 
   0  -1   1  234.08   20.30 
   0  -1   1  255.67   21.30 
   0   1   1  236.98   18.50 
  -1   0   1  229.68   19.20 
  -1   0   1  246.18   24.30 
   1   0   1  228.78   18.80 
   1   0   1  243.18   19.00 
   0   1   1  240.48   16.50 
   0  -1   1  232.28   26.20 
   0  -1   1  243.78   16.00 
   1   0   1  227.98   18.60 
   0   1   1  263.87   19.70 
  -1   0   1  268.07   21.60 
   0  -1   1  226.28   25.80 
   1   0   1  221.88   18.50 
   0  -1   1  234.28   21.00 
   1   0   1  200.18   25.90 
  -1   0   1  211.08   17.20 
  -1   0   1  167.08   21.10 
  -1   0   1  201.78   17.80 
  -1   0   1  213.68   19.80 
   1   1  -1    4.20    6.30 
  -1  -1  -1   13.50    7.90 
   1   1  -1    4.30    7.20 
  -1   1  -1   -2.30    6.20 
  -1   1  -1    3.20    3.00 
  -1   1  -1   -1.00    3.30 
   1  -1  -1    0.40    3.20 
   1  -1  -1   -0.20    4.40 
  -1   1  -1    0.70    8.80 
   1   1  -1    5.00    7.60 
  -1  -1  -1    5.40    5.00 
  -1   1  -1   -5.40    3.90 
   1   1  -1    4.10    6.60 
  -1   1  -1   -2.00    3.20 
   1   1  -1   11.20    8.50 
   1   1  -1    4.80    3.60 
  -1  -1  -1    8.20    3.60 
   1   1  -1    7.10    9.30 
   1  -1  -1    0.90    5.30 
  -1  -1  -1   16.20    6.60 
   1   1  -1    1.30    8.60 
  -1  -1  -1   10.20    3.20 
  -1  -1  -1   16.10    6.10 
   1   1  -1    2.90    7.10 
  -1   1  -1    0.90    5.20 
   1  -1  -1    8.10    8.20 
  -1  -1  -1   14.50    6.70 
  -1   1  -1   18.30    5.90 
   1   1  -1   -0.30    5.60 
  -1  -1  -1    8.60    3.00 
  -1  -1  -1    5.10    5.70 
   1   1  -1    0.40    6.50 
   1  -1  -1    6.20    4.40 
   1  -1  -1   11.40    8.10 
   1  -1  -1    0.60    3.30 
   1   1  -1   12.70    3.50 
   1  -1  -1    0.80    5.90 
   1  -1  -1   11.50    5.50 
   1   1  -1    2.40    6.50 
   1  -1  -1    7.30    3.60 
  -1  -1  -1    5.80    5.00 
  -1   1  -1    2.30    4.90 
  -1   1  -1   -5.40    3.90 
   1  -1  -1   -4.30    2.20 
   1  -1  -1    2.00    1.70 
  -1  -1  -1    6.40    3.00 
  -1  -1  -1    3.90    3.10 
   1   1  -1    7.70    6.40 
  -1  -1  -1   10.00    5.00 
  -1  -1  -1   10.40    7.20 
   1   1  -1    2.90    6.10 
   1   1  -1    3.20    7.30 
   1  -1  -1    9.20    5.90 
  -1  -1  -1   11.60    6.30 
  -1   1  -1   12.40   10.30 
  -1  -1  -1    3.50    4.30 
   1   1  -1    8.10   11.00 
   1   1  -1    9.80    6.60 
  -1  -1  -1    7.10    7.00 
  -1   1  -1    8.70    3.60 
  -1   1  -1    3.40    4.20 
   1  -1  -1    8.40    5.70 
   1  -1  -1   -1.10    4.70 
  -1   1  -1    4.50    2.80 
   1  -1  -1   23.80    5.70 
   1  -1  -1    1.40    4.70 
  -1  -1  -1    2.10    6.80 
   1   1  -1   35.50    9.60 
   1  -1  -1   12.70    3.20 
   1   1  -1    3.80    9.00 
   1  -1  -1    3.60    4.10 
   1  -1  -1    3.60    4.70 
   1  -1  -1    0.80    5.00 
  -1  -1  -1    3.80    2.90 
   1   1  -1    6.50    5.90 
  -1   1  -1    2.40    4.20 
  -1  -1  -1    9.00    5.30 
  -1   1  -1    8.90    7.90 
   1  -1  -1   -0.20    4.10 
   1  -1  -1    8.40    6.60 
  -1   1  -1    7.90    4.50 
   1  -1  -1    4.70    2.50 
  -1  -1  -1   14.40    5.30 
   1   1  -1    8.70    7.90 
   1   1  -1   16.20    9.20 
   1   1  -1    3.00    9.70 
  -1  -1  -1    3.50    4.00 
  -1   1  -1   12.40    4.30 
  -1  -1  -1    1.10    6.80 
  -1  -1  -1    1.60    3.90 
  -1  -1  -1    9.60    6.50 
  -1  -1  -1    8.70    7.50 
  -1  -1  -1   10.80    7.30 
   1  -1  -1    1.50    4.20 
   1   1  -1   -2.60    5.30 
  -1   1  -1    6.00    4.20 
  -1   1  -1    0.70    8.50 
   1   1   1    8.00    2.70 
  -1  -1   1   16.80    7.90 
   1  -1   1    7.50    5.50 
   1   1   1    3.60    4.90 
   1   1   1    5.60    2.30 
   1   1   1   -4.20    3.10 
   1  -1   1   -3.50    4.70 
  -1   1   1    5.10    2.80 
  -1   1   1    6.10    3.20 
  -1  -1   1   -9.30    7.20 
  -1  -1   1    5.90    7.40 
  -1   1   1    9.10    4.80 
   1   1   1    5.70    4.20 
   1  -1   1    9.10    5.80 
  -1   1   1    6.90    3.90 
   1   1   1    0.70    3.70 
  -1  -1   1   10.80    6.30 
  -1  -1   1   -1.00    6.20 
  -1  -1   1    2.30    6.50 
   1   1   1   -7.10    4.60 
   1   1   1    7.50    3.70 
  -1   1   1    3.70    4.80 
   1  -1   1    9.50    4.50 
   1  -1   1   -1.20    4.70 
   1  -1   1    8.30    5.60 
  -1  -1   1   -3.60    2.40 
  -1  -1   1    7.40    9.40 
   1   1   1    8.60    4.20 
  -1   1   1    5.30    5.30 
  -1  -1   1    5.00    6.00 
   1   1   1    8.30    3.00 
   1  -1   1    3.20    6.90 
  -1  -1   1   -0.70    5.90 
   1  -1   1    5.90    7.00 
  -1  -1   1   11.00    9.60 
   1  -1   1    8.10    4.80 
  -1  -1   1    1.20    7.00 
   1   1   1    5.90    8.00 
   1   1   1    2.20    6.80 
   1   1   1    3.60    6.00 
  -1  -1   1    7.40    7.10 
   1  -1   1    9.70    5.50 
   1  -1   1    6.90    8.80 
   1  -1   1    1.20    2.50 
  -1  -1   1    9.70    6.60 
   1  -1   1    1.40    5.40 
  -1  -1   1   21.60    8.90 
  -1  -1   1   -2.90    8.80 
   1   1   1    3.40    4.40 
   1   1   1   -2.20    6.20 
   1  -1   1    7.20    5.10 
   1   1   1    0.90    4.00 
  -1  -1   1   10.10    6.30 
  -1  -1   1   12.90    9.60 
  -1   1   1    3.80    4.60 
  -1   1   1    3.30    2.70 
   1   1   1    1.00    4.30 
   1  -1   1   -0.90    4.30 
  -1   1   1   13.20    7.40 
   1  -1   1   30.60   12.10 
   1   1   1    1.50    3.10 
  -1  -1   1   13.90    6.70 
  -1  -1   1    0.00    6.60 
  -1  -1   1    9.20    6.70 
  -1  -1   1    3.40    8.50 
   1   1   1    2.80    4.20 
  -1   1   1    1.70    5.60 
   1  -1   1    4.20    3.00 
   1  -1   1    1.90    4.50 
   1   1   1    1.60    5.10 
   1  -1   1   -2.90    7.60 
   1   1   1    5.80    2.50 
  -2  -1  -1 1134.59   79.39 
  -1   2  -1 1280.07   82.59 
   1  -2  -1 1224.98   78.79 
   2   1  -1 1119.29   81.49 
   1  -2  -1 1165.58   79.09 
   1  -2  -1 1244.88   85.29 
   2   1  -1 1195.68   82.19 
  -1   2  -1 1186.08   78.09 
   1  -2  -1 1213.58   78.19 
   2   1  -1 1221.28   82.19 
  -1   2  -1 1199.38   81.19 
  -1   2  -1 1212.68   72.89 
  -1   2  -1 1172.28   77.69 
   2   1  -1 1175.58   83.49 
  -1   2  -1 1157.58   78.49 
  -1   2  -1 1272.77   81.59 
  -2  -1  -1 1241.28   81.79 
   1  -2  -1 1256.67   75.59 
  -2  -1  -1 1179.58   79.79 
   1  -2  -1 1226.38   79.59 
  -2  -1  -1 1221.58   78.69 
  -2  -1  -1 1247.28   75.69 
  -1   2  -1 1283.07   75.69 
  -1   2  -1 1168.78   80.59 
  -1   2  -1 1222.78   76.79 
   2   1  -1 1204.88   84.59 
   1  -2  -1 1180.58   78.69 
   2   1  -1 1078.99   88.59 
   2   1  -1 1183.38   76.69 
   2   1  -1 1164.98   76.99 
  -2  -1  -1 1163.48   76.79 
  -1   2  -1 1267.47   79.49 
  -1   2  -1 1153.68   77.99 
  -2  -1  -1 1177.38   84.39 
   1  -2  -1 1304.07   81.59 
  -2  -1  -1 1129.89   86.69 
   2   1  -1 1165.08   81.99 
  -1   2  -1 1129.29   88.19 
  -2  -1  -1 1056.09   82.69 
  -2  -1  -1 1287.77   79.79 
   2   1  -1 1324.17   86.99 
   1  -2  -1 1170.58   72.99 
   2   1  -1 1003.70   86.59 
  -1   2  -1 1112.79   80.69 
  -2  -1  -1 1165.48   75.69 
  -2  -1  -1 1064.29   86.59 
   2   1  -1 1173.88   82.69 
  -2  -1  -1 1241.28   80.79 
   2   1  -1 1136.89   84.29 
  -2  -1  -1 1037.50   85.09 
   2   1  -1 1140.49   77.79 
   1  -2  -1 1234.48   75.39 
  -2  -1  -1 1144.99   86.19 
   1  -2  -1 1285.47   73.89 
   1  -2  -1 1210.28   80.29 
   1  -2  -1 1100.39   82.49 
   2   1  -1 1162.68   84.99 
   1  -2  -1 1258.87   76.59 
   2   1  -1 1160.98   83.69 
   1  -2  -1 1147.19   76.39 
   1  -2  -1 1236.08   73.69 
   2   1  -1 1025.00   86.79 
   1  -2  -1 1229.88   76.19 
   2   1  -1 1080.49   80.29 
  -1   2  -1 1277.97   88.49 
  -1   2  -1 1276.97   83.39 
   2   1  -1 1006.00   82.49 
  -2  -1  -1 1206.78   87.19 
  -1   2  -1 1249.07   78.39 
  -2  -1  -1 1165.78   78.69 
   2   1  -1 1193.18   82.29 
  -1   2  -1 1130.39   76.29 
  -2  -1  -1 1235.38   85.59 
   1  -2  -1 1104.69   84.29 
   2   1  -1 1134.69   80.39 
  -2  -1  -1 1157.78   84.99 
  -1   2  -1 1187.28   89.59 
   1  -2  -1 1207.98   80.09 
  -2  -1  -1 1226.98   80.89 
   2   1  -1 1113.49   90.99 
   1  -2  -1 1176.68   81.89 
  -2  -1  -1 1147.79   83.39 
   2   1  -1 1114.19   81.89 
   1  -2  -1 1324.67   80.69 
   1  -2  -1 1184.58   80.79 
  -1   2  -1 1133.49   89.39 
   1  -2  -1 1140.39   80.29 
  -2  -1  -1 1079.39   87.09 
   2   1  -1 1181.68   77.29 
   1  -2  -1 1284.77   84.29 
   2   1  -1 1116.19   83.29 
  -2  -1  -1 1182.48   84.39 
  -2  -1  -1 1211.48   75.59 
  -2  -1  -1 1230.38   79.79 
   1  -2   1 1207.48   77.39 
   2   1   1 1156.78   84.89 
   1  -2   1 1176.08   80.59 
   2   1   1 1153.18   84.99 
   2   1   1 1244.88   78.59 
   2   1   1 1246.78   75.39 
   1  -2   1 1220.08   82.19 
  -2  -1   1 1245.48   76.79 
   2   1   1 1154.78   78.79 
  -2  -1   1 1193.58   84.89 
   2   1   1 1201.08   80.99 
  -1   2   1 1259.27   73.29 
   2   1   1 1291.57   75.79 
   1  -2   1 1151.28   78.79 
   1  -2   1 1252.77   81.69 
   1  -2   1 1150.58   80.79 
   1  -2   1 1203.48   88.59 
  -1   2   1 1150.38   79.19 
   1  -2   1 1034.00   83.29 
   1  -2   1 1073.99   87.39 
   1  -2   1 1213.98   79.19 
  -2  -1   1 1183.18   85.69 
  -2  -1   1 1088.49   80.89 
  -2  -1   1 1161.48   84.99 
  -1   2   1 1220.58   73.79 
  -1   2   1 1204.68   80.69 
  -2  -1   1 1134.79   84.19 
   2   1   1 1090.99   74.49 
   1  -2   1 1266.87   78.29 
   1  -2   1 1190.28   79.79 
  -1   2   1 1155.08   77.89 
   2   1   1 1177.38   81.69 
  -2  -1   1 1174.18   82.79 
  -2  -1   1 1067.69   85.09 
   2   1   1 1163.78   86.19 
   1  -2   1 1251.17   82.69 
   1  -2   1 1332.77   77.49 
  -2  -1   1 1220.18   74.59 
   2   1   1 1144.59   85.79 
  -1   2   1 1176.88   72.89 
   2   1   1 1131.19   86.19 
  -2  -1   1 1141.99   81.29 
  -1   2   1 1225.18   73.89 
   1  -2   1 1179.38   83.59 
   2   1   1 1203.28   80.39 
   1  -2   1 1132.19   86.79 
  -1   2   1 1204.48   80.09 
   2   1   1 1119.89   83.69 
   2   1   1 1119.29   77.59 
   1  -2   1 1229.68   80.09 
   1  -2   1 1288.17   76.49 
   2   1   1 1170.98   87.19 
  -2  -1   1 1122.19   83.49 
  -1   2   1 1135.79   74.09 
   1  -2   1 1148.39   81.09 
   2   1   1 1229.18   74.99 
  -2  -1   1 1047.20   86.29 
   2   1   1 1152.48   84.49 
   1  -2   1 1045.30   84.59 
  -1   2   1 1213.18   80.29 
  -2  -1   1 1224.28   78.19 
  -2  -1   1 1187.78   82.79 
   2   1   1 1186.38   79.69 
  -1   2   1 1233.08   77.99 
   2   1   1 1230.08   78.59 
  -1   2   1 1185.08   79.99 
  -1   2   1 1157.68   72.19 
  -1   2   1 1243.18   73.29 
   1  -2   1 1174.08   79.99 
  -2  -1   1 1195.18   91.49 
  -2  -1   1 1221.28   75.99 
  -2  -1   1 1234.68   83.19 
  -2  -1   1 1111.09   87.49 
   1  -2   1 1261.07   81.09 
  -2  -1   1 1068.39   88.49 
   2   0  -1    1.90    6.70 
   2   0  -1   12.60    8.80 
   0  -2  -1   10.30    7.30 
   0  -2  -1   14.40    6.90 
   0   2  -1   24.40   12.20 
   0  -2  -1   12.50    5.80 
   0  -2  -1   17.50    9.40 
  -2   0  -1    2.60    8.80 
   2   0  -1   18.40    8.00 
  -2   0  -1    6.60   10.20 
   0  -2  -1    5.50    3.40 
   2   0  -1    3.60    7.30 
   0   2  -1   16.10    8.20 
   0   2  -1    4.20    7.90 
   0   2  -1   11.80    7.60 
   0  -2  -1   16.70   10.30 
   2   0  -1    5.30    5.30 
   2   0  -1   14.20    7.80 
   2   0  -1   24.00   10.00 
  -2   0  -1    6.80    5.90 
   2   0  -1    4.20    8.50 
  -2   0  -1   10.00    6.30 
   2   0  -1   11.60    7.30 
   2   0  -1   14.00   10.50 
   0  -2  -1   21.60    8.00 
   0  -2  -1    5.00    6.20 
   2   0  -1   11.30    8.90 
   2   0  -1    8.70    7.40 
   2   0  -1   10.30    8.80 
   0  -2  -1    6.50    2.40 
   0   2  -1    1.80    6.60 
   2   0  -1    1.80    6.30 
   0   2  -1   14.90    9.60 
   2   0  -1   24.30    8.70 
   0  -2  -1    7.10    5.70 
  -2   0  -1   18.20    4.50 
  -2   0  -1    8.70    6.40 
   0  -2  -1   -2.20    5.50 
  -2   0  -1   -0.30    5.30 
   2   0  -1   10.40    7.50 
   0  -2  -1   17.30    6.30 
  -2   0  -1    0.70    5.50 
  -2   0  -1   22.00   10.10 
  -2   0  -1   14.90    6.50 
   0   2  -1    0.50    7.40 
  -2   0  -1   10.30   10.20 
   0  -2  -1   23.60    8.90 
  -2   0  -1   -3.20    8.70 
   0   2  -1   14.00   10.30 
  -2   0  -1    8.30    5.70 
   0   2  -1    4.10    7.40 
   2   0  -1    6.60    4.90 
   0   2  -1   10.90    7.00 
   2   0  -1    5.70    7.70 
   2   0  -1   11.20    8.80 
   0  -2  -1    7.50    3.50 
   2   0  -1   11.30    8.00 
   0   2  -1   -2.10    5.00 
   0   2  -1   20.10    9.70 
   2   0  -1    2.80    6.40 
   2   0  -1   11.40    3.70 
   0  -2  -1    6.20    8.70 
   2   0  -1    5.00    3.80 
   0  -2  -1   13.10    5.20 
   0  -2  -1   15.70    5.10 
   0   2  -1    4.90    5.80 
   0  -2  -1   16.90    9.60 
   0   2  -1    8.10    7.70 
   0   2  -1    2.40    4.70 
   0  -2  -1   -5.00    3.90 
   0   2  -1    5.60    7.00 
  -2   0  -1   17.40    9.10 
   0   2  -1   10.90    8.10 
  -2   0  -1   -1.50    4.60 
  -2   0  -1    3.60    8.20 
  -2   0  -1   31.20   11.10 
  -2   0  -1    4.00    5.70 
  -2   0  -1   -2.10   11.20 
   0   2  -1   16.40    7.50 
   0   2  -1    9.70    7.40 
   0   2  -1   14.60    2.90 
   2   0  -1   14.10    7.90 
   0   2  -1    1.00    4.00 
   0   2  -1   22.80    8.60 
   2   0  -1    5.30   10.10 
   0  -2  -1   22.10    6.40 
  -2   0  -1   10.70    6.00 
   0  -2  -1    9.60    6.90 
  -2   0  -1   11.00    6.30 
   0  -2  -1   13.80    6.10 
   0  -2  -1   18.10    9.00 
   2   0  -1   13.00    7.70 
   2   0  -1   16.30    6.70 
   0  -2  -1   18.10    6.40 
  -2   0  -1   20.40    7.50 
   0   2  -1   24.50   11.00 
  -2   0  -1    8.20    3.90 
   0   2  -1    8.10    7.00 
   0  -2  -1   20.90    9.50 
  -2   0  -1    1.80    7.90 
  -2   0  -1   15.30    9.80 
   0   2  -1   24.20   11.00 
  -2   0   1   10.50    6.20 
   2   0   1   11.10    6.00 
   2   0   1   14.00    7.70 
   2   0   1   12.00    8.60 
  -2   0   1   41.20   11.30 
   2   0   1   13.60    7.10 
   0   2   1    1.30    4.60 
   0  -2   1   23.20    8.70 
  -2   0   1    6.70    6.10 
   0  -2   1    9.30    8.30 
   2   0   1    8.30    5.80 
   0  -2   1   33.30   13.20 
  -2   0   1    4.60    8.40 
   0  -2   1    6.50    5.90 
  -2   0   1   13.40   10.40 
   2   0   1   -2.50    4.70 
   0   2   1    9.90    8.70 
   2   0   1   15.40    9.20 
   0   2   1   -3.30    3.30 
  -2   0   1    2.70    9.00 
   2   0   1    1.20   11.50 
   0   2   1   21.20    5.30 
  -2   0   1   -2.40    6.90 
  -2   0   1    6.20    7.30 
   0   2   1   12.80    4.40 
   2   0   1   11.20   10.90 
   0   2   1   -2.90    4.70 
   0  -2   1   -1.10    5.20 
   0  -2   1   12.70    8.30 
   2   0   1   14.70   10.70 
   0  -2   1    2.00    6.10 
  -2   0   1    8.70    7.60 
   0   2   1    9.70    5.50 
  -2   0   1   13.80    7.30 
   2   0   1    9.70    6.50 
   0  -2   1   12.50    8.50 
   0   2   1   11.80    7.20 
   0  -2   1    8.00    7.00 
   0  -2   1    4.10    8.50 
   0   2   1   -1.20    4.50 
   0   2   1    9.60    7.00 
   2   0   1    7.10    5.50 
   0   2   1    5.50    5.00 
  -2   0   1    1.80    6.40 
   0  -2   1   10.80    8.40 
  -2   0   1    7.80    7.30 
   0  -2   1    9.70    7.90 
   0  -2   1   -1.90    5.50 
   0  -2   1   -9.40    6.60 
   0  -2   1   -3.00    5.50 
   0  -2   1   -0.60    7.00 
   2   0   1    8.20    7.10 
  -2   0   1   13.50    7.20 
   2   0   1   27.10    9.80 
  -2   0   1   -2.40    4.30 
   2   0   1    4.10    4.90 
  -2   0   1    6.40    9.50 
   0  -2   1   18.40    9.50 
   0  -2   1   20.90    9.30 
   2   0   1   16.90    9.20 
   0  -2   1   30.00   11.80 
  -2   0   1   20.20    8.30 
   2   0   1   10.50    6.00 
   0   2   1    7.60    4.40 
   0   2   1    6.90    3.40 
   0  -2   1    6.80    7.20 
   0  -2   1    5.80    5.70 
   0   2   1   11.50    4.40 
   0  -2   1   16.00    7.30 
  -2   0   1   -6.10    6.10 
   0   2   1    4.70    5.00 
   0  -2   1   16.20    9.60 
  -2   0   1   17.90    3.00 
   0   2   1   14.20    4.50 
   0  -2   1   13.80    6.10 
  -2   0   1   11.80    7.30 
   0  -2   1    6.20    5.40 
   2   0   1   15.50    6.90 
   2   0   1   27.00    9.90 
  -2   0   1   20.70    8.00 
   0   2   1    5.50    2.60 
   2   0   1   15.00    7.50 
   0  -2   1   20.40    9.90 
   2   0   1    7.70    6.50 
   2   0   1   11.40    4.00 
  -1  -2  -1 1317.47   82.09 
   2  -1  -1 1251.97   80.09 
  -2   1  -1 1131.79   77.19 
   2  -1  -1 1220.88   79.79 
   2  -1  -1 1152.38   80.39 
   2  -1  -1 1226.58   77.89 
  -2   1  -1 1155.08   88.39 
   1   2  -1 1205.58   85.39 
   2  -1  -1 1176.28   72.69 
   2  -1  -1 1191.88   80.29 
   1   2  -1 1101.59   88.59 
  -1  -2  -1 1224.38   82.99 
  -2   1  -1 1148.29   81.69 
   2  -1  -1 1196.78   80.59 
  -2   1  -1 1215.58   76.09 
   2  -1  -1 1103.09   81.19 
  -1  -2  -1 1142.39   83.99 
   2  -1  -1 1168.08   81.19 
  -2   1  -1 1139.99   87.79 
  -2   1  -1 1137.49   85.49 
  -2   1  -1 1196.38   75.59 
   1   2  -1 1170.08   82.89 
  -2   1  -1 1241.88   77.89 
   1   2  -1 1115.29   81.49 
   1   2  -1 1080.19   87.89 
   1   2  -1 1133.39   84.69 
  -1  -2  -1 1203.98   78.29 
   1   2  -1 1131.89   82.69 
   1   2  -1 1180.58   82.59 
  -1  -2  -1 1318.97   79.99 
   2  -1  -1 1232.48   75.39 
   1   2  -1 1107.29   83.59 
   2  -1  -1 1239.28   82.79 
  -1  -2  -1 1134.09   80.59 
   2  -1  -1 1115.39   81.09 
   1   2  -1 1208.08   83.69 
  -1  -2  -1 1159.18   79.49 
   2  -1  -1 1172.08   81.19 
  -1  -2  -1 1203.08   82.09 
   2  -1  -1 1198.48   80.49 
   2  -1  -1 1276.17   81.39 
  -1  -2  -1 1205.38   75.69 
   2  -1  -1 1232.48   89.09 
  -1  -2  -1 1330.27   81.79 
   1   2  -1 1064.19   84.59 
   1   2  -1 1144.49   78.59 
   2  -1  -1 1152.98   77.69 
   2  -1  -1 1178.68   76.99 
  -2   1  -1 1246.08   80.39 
   1   2  -1 1281.17   88.89 
  -2   1  -1 1154.48   78.29 
   2  -1  -1 1190.78   76.69 
   1   2  -1 1180.68   80.09 
  -1  -2  -1 1294.47   82.69 
   2  -1  -1 1212.48   80.99 
   1   2  -1 1217.38   83.09 
  -1  -2  -1 1200.98   80.79 
   1   2  -1 1174.38   79.89 
   2  -1  -1 1124.79   83.99 
   2  -1  -1 1106.89   75.99 
   1   2  -1 1164.78   83.39 
   2  -1  -1 1212.98   76.69 
   1   2  -1 1232.18   83.29 
  -1  -2  -1 1123.09   79.49 
  -1  -2  -1 1258.17   84.39 
   1   2  -1 1003.90   83.79 
   1   2  -1 1082.79   78.49 
   1   2  -1 1249.18   79.99 
  -2   1  -1 1165.98   78.49 
  -1  -2  -1 1188.88   85.99 
  -1  -2  -1 1225.28   80.59 
   1   2  -1  978.50   85.49 
  -1  -2  -1 1115.99   80.79 
  -2   1  -1 1212.98   80.99 
   2  -1  -1 1178.08   72.69 
  -2   1  -1 1163.78   80.79 
  -1  -2  -1 1252.07   77.69 
  -1  -2  -1  977.20   83.79 
   2  -1  -1 1185.98   80.39 
  -1  -2  -1 1230.58   76.09 
   2  -1  -1 1193.98   83.39 
  -2   1  -1 1108.39   88.09 
  -1  -2  -1 1153.98   79.19 
  -2   1  -1 1251.07   77.39 
  -2   1  -1 1165.38   78.59 
  -2   1  -1 1178.88   79.29 
  -2   1  -1 1082.69   87.49 
  -1  -2  -1 1280.07   83.29 
  -2   1  -1 1178.98   75.39 
  -2   1  -1 1183.08   79.09 
  -1  -2  -1 1168.98   77.49 
  -1  -2  -1 1135.19   83.59 
   2  -1  -1 1222.38   78.19 
  -1  -2   1 1178.88   78.99 
   2  -1   1 1074.09   82.09 
  -2   1   1 1194.48   78.59 
   1   2   1 1321.07   83.39 
  -1  -2   1 1199.88   79.29 
  -1  -2   1 1076.69   82.49 
  -1  -2   1 1121.39   82.49 
  -2   1   1 1109.29   73.49 
  -1  -2   1 1249.07   88.69 
  -2   1   1 1249.38   81.49 
  -1  -2   1 1222.88   81.49 
  -2   1   1 1117.29   74.39 
  -1  -2   1 1307.27   83.29 
  -1  -2   1 1174.18   87.19 
   1   2   1 1252.77   80.09 
  -1  -2   1 1167.28   77.59 
   1   2   1 1184.08   81.59 
  -2   1   1 1218.08   74.99 
   2  -1   1 1258.87   78.29 
   2  -1   1 1210.28   80.69 
   2  -1   1 1213.08   79.59 
  -2   1   1 1243.88   83.09 
  -1  -2   1 1201.88   83.09 
   1   2   1 1188.48   79.39 
   2  -1   1 1216.38   77.59 
  -1  -2   1 1158.18   85.49 
   2  -1   1 1211.38   80.49 
  -2   1   1 1283.97   77.19 
   1   2   1 1235.38   75.09 
   2  -1   1 1134.09   89.59 
  -2   1   1 1240.28   81.09 
   1   2   1 1126.19   80.49 
  -2   1   1 1120.09   83.29 
   2  -1   1 1181.48   87.19 
   2  -1   1 1316.67   79.49 
   1   2   1 1078.19   84.99 
  -2   1   1 1202.48   85.19 
   1   2   1 1196.88   78.49 
  -2   1   1 1199.38   75.19 
  -1  -2   1 1198.98   86.49 
  -2   1   1 1193.98   85.69 
   2  -1   1 1156.38   79.19 
   2  -1   1 1277.47   76.89 
  -1  -2   1 1176.58   83.19 
   1   2   1 1213.18   83.99 
  -1  -2   1 1217.48   78.09 
   2  -1   1 1248.38   80.49 
   1   2   1 1245.48   81.49 
  -1  -2   1 1163.18   82.89 
  -1  -2   1 1298.37   83.89 
  -1  -2   1 1216.68   85.49 
   2  -1   1 1287.07   82.79 
   2  -1   1 1229.48   81.19 
   2  -1   1 1168.48   77.19 
   2  -1   1 1232.38   76.49 
   2  -1   1 1228.48   75.99 
  -1  -2   1 1225.88   84.99 
   1   2   1 1115.49   76.99 
  -1  -2   1 1110.79   83.29 
  -2   1   1 1181.78   79.39 
  -1  -2   1 1122.09   84.09 
   1   2   1 1230.68   78.79 
  -1  -2   1 1193.78   85.69 
  -1  -2   1 1154.58   87.99 
  -1  -2   1 1123.79   78.59 
  -2   1   1 1245.98   84.69 
   2  -1   1 1259.67   82.09 
  -2   1   1 1141.29   75.79 
   2  -1   1 1158.68   76.69 
   1   2   1 1253.67   79.89 
   1   2   1 1238.68   79.99 
   2  -1   1 1173.58   80.29 
   2  -1   1 1210.08   89.49 
  -1  -2   1 1130.09   79.19 
  -1  -2   1 1203.98   83.69 
  -1  -2   1 1181.58   86.19 
   2  -1   1 1214.18   77.39 
   2  -1   1 1161.48   88.89 
   1   2   1 1230.48   83.29 
  -2   1   1 1126.59   73.69 
  -2   1   1 1332.27   81.49 
  -2   1   1 1218.38   75.99 
  -2   2  -1   -4.10    6.20 
   2   2  -1   -4.10    7.60 
  -2   2  -1  -10.50    8.10 
  -2   2  -1   25.40   16.60 
  -2   2  -1    7.40    6.70 
   2   2  -1   13.70    8.00 
  -2   2  -1   -0.60    6.40 
  -2   2  -1   27.60   16.80 
   2   2  -1   -2.10    6.90 
   2  -2  -1    1.20    8.60 
   2  -2  -1    1.00    6.20 
  -2  -2  -1   13.80   10.30 
   2   2  -1    8.90   10.70 
  -2   2  -1    9.70   13.90 
  -2  -2  -1   -0.40    2.50 
   2   2  -1   -5.10    6.90 
   2  -2  -1   10.90    8.10 
   2   2  -1    7.70    9.60 
   2  -2  -1   -2.10    4.20 
   2   2  -1   -0.90    8.10 
  -2  -2  -1    7.90    3.20 
   2  -2  -1    3.00    7.30 
  -2   2  -1    9.20    4.40 
   2   2  -1   -4.00   13.30 
   2   2  -1    4.60    7.20 
   2  -2  -1   11.90    6.80 
  -2  -2  -1   -1.70    8.50 
   2  -2  -1    9.40    7.60 
  -2  -2  -1   -7.00    6.50 
  -2  -2  -1    7.00    7.30 
   2   2  -1   -4.90    6.40 
  -2  -2  -1    2.00    6.50 
   2   2  -1   -1.40   12.90 
   2   2  -1   -3.20    7.60 
   2  -2  -1   13.00    5.30 
   2  -2  -1   19.70   10.00 
   2  -2  -1   -7.50    4.80 
  -2  -2  -1    6.10    5.40 
  -2  -2  -1   -2.10    2.70 
  -2   2  -1    2.10    7.20 
  -2   2  -1    5.60    5.00 
  -2  -2  -1   29.10   11.60 
   2  -2  -1    5.80    7.20 
  -2   2  -1   10.10    7.70 
  -2   2  -1    3.80    5.40 
  -2  -2  -1   17.00   11.30 
  -2   2  -1    2.70    5.00 
   2  -2  -1    3.80    6.80 
   2  -2  -1   13.80    8.30 
   2   2  -1    2.80    9.50 
   2  -2  -1   -1.90    8.70 
   2   2  -1   24.30   11.60 
   2   2  -1    9.10    7.00 
  -2  -2  -1   14.90   12.70 
   2  -2  -1    2.70   10.60 
   2  -2  -1   -2.90    6.80 
  -2  -2  -1    2.50   11.40 
  -2  -2  -1    5.80   10.40 
   2  -2  -1    5.90    6.50 
  -2  -2  -1    2.80    5.60 
  -2  -2  -1    1.20   10.30 
  -2  -2  -1   21.60   11.60 
  -2   2  -1    1.00    5.40 
   2   2  -1   10.50   10.10 
  -2  -2  -1    3.30    7.20 
  -2  -2  -1    1.30    8.90 
  -2  -2  -1   27.70   10.00 
  -2  -2  -1   -0.30    8.60 
  -2  -2  -1    3.40    5.40 
  -2  -2  -1   19.80    9.90 
   2   2  -1   17.30   15.40 
  -2  -2  -1    0.90    9.40 
  -2  -2  -1    2.90   10.70 
  -2  -2  -1    2.60   10.00 
   2  -2  -1   -4.30    8.70 
   2  -2  -1   -4.00    6.20 
   2  -2  -1    6.00    3.10 
  -2  -2  -1   16.70    8.40 
  -2   2  -1    0.60    6.70 
   2   2  -1   21.70   16.10 
   2  -2  -1   14.40    8.00 
   2   2  -1    9.40    8.60 
   2  -2  -1    0.80    4.20 
   2   2  -1    0.80    9.30 
  -2   2  -1    9.80   12.20 
   2   2  -1    5.60    9.80 
   2   2  -1   -2.90    9.40 
   2   2  -1    3.90    8.60 
   2  -2  -1   16.70    7.20 
  -2   2  -1    2.90    5.00 
  -2  -2  -1   22.80   13.10 
   2  -2   1    3.40    4.10 
   2  -2   1    8.70    8.50 
  -2   2   1   -5.50    8.10 
  -2  -2   1   -6.70    8.10 
   2   2   1    7.00    6.70 
   2   2   1    7.00    3.60 
  -2  -2   1    5.80    9.00 
   2   2   1   -0.20    6.70 
   2  -2   1   10.60    5.00 
  -2  -2   1   -4.20   11.90 
  -2  -2   1    5.20    6.90 
  -2  -2   1   -3.90   10.50 
   2  -2   1    7.00   13.20 
  -2  -2   1   23.80   13.00 
  -2  -2   1   22.00    6.00 
  -2  -2   1    1.00    8.50 
   2  -2   1   10.60    8.90 
  -2  -2   1   -2.10    9.10 
   2   2   1    0.90    5.80 
  -2   2   1   -4.40   10.90 
   2   2   1   22.10   12.80 
   2   2   1   15.30   12.50 
  -2   2   1   10.80    7.70 
   2  -2   1    1.60    7.00 
  -2  -2   1    4.20    8.00 
   2  -2   1    1.90    9.70 
  -2  -2   1    3.70   12.50 
  -2   2   1    1.60    6.00 
   2  -2   1   -2.60    6.50 
   2   2   1    4.70    7.20 
   2   2   1   13.70    8.10 
  -2  -2   1    9.90    8.60 
   2  -2   1    4.10    6.20 
   2  -2   1    0.30    7.30 
   2  -2   1    2.90    6.50 
  -2   2   1   -3.90    6.30 
   2  -2   1   10.30   11.30 
  -2  -2   1   25.60   15.30 
   2  -2   1   10.00    7.60 
   2   2   1   -2.20    5.70 
   2   2   1   -2.50    9.80 
   2  -2   1    2.70    6.50 
  -2  -2   1   14.80   10.40 
   2  -2   1   11.50    6.50 
  -2   2   1   -4.70    7.70 
  -2  -2   1    7.00    9.10 
  -2   2   1   16.90    7.40 
   2   2   1   -1.70    7.40 
  -2  -2   1   -2.30    8.80 
   2   2   1    1.90    6.20 
  -2  -2   1   -1.10    7.60 
  -2  -2   1   -0.10    8.60 
  -2  -2   1   18.00   14.40 
   2  -2   1   20.10   11.10 
  -2  -2   1    1.30    8.20 
   2   2   1   -0.30    9.70 
   2   2   1   10.80    9.60 
   2  -2   1    8.30   13.40 
   2  -2   1   10.10    6.50 
  -2  -2   1   -7.20    5.00 
   2   2   1   -3.30    8.30 
   2  -2   1    0.50    6.20 
   2   2   1   19.30    9.80 
  -2   2   1    6.90    3.90 
   2  -2   1    5.30    7.10 
   2   2   1    4.00    7.70 
   2   2   1    6.90   11.30 
   2  -2   1    7.30    5.00 
   2   2   1    4.20   10.40 
  -2  -2   1   15.00   14.00 
  -2   2   1   -2.60    6.40 
   2  -2   1  -12.10   11.50 
  -2   2   1   18.10    8.10 
  -2   2   1   19.00    8.50 
  -2  -2   1   -2.80    6.90 
  -2   2   1    4.30    2.10 
  -2   2   1    8.10    6.70 
   2  -2   1   -5.50    9.50 
  -2  -2   1    2.00    8.60 
   2  -2   1   -0.20    4.10 
   2   2   1    4.10    7.30 
  -2  -2   1    9.90   10.60 
  -2   2   1   26.20   12.50 
   2  -2   1   -3.30    7.40 
  -3  -2  -1  300.27   45.60 
   3   2  -1  282.17   40.50 
   2  -3  -1  282.67   34.30 
  -3  -2  -1  342.87   41.00 
  -3  -2  -1  289.27   33.80 
  -3  -2  -1  333.17   36.60 
   3   2  -1  291.17   40.30 
   3   2  -1  332.67   34.50 
  -3  -2  -1  338.27   48.00 
   3   2  -1  249.58   37.00 
  -3  -2  -1  363.26   47.20 
  -2   3  -1  226.48   33.40 
   2  -3  -1  269.97   33.20 
   2  -3  -1  248.38   28.40 
   3   2  -1  262.07   36.60 
   2  -3  -1  274.07   27.00 
   3   2  -1  271.57   38.90 
  -3  -2  -1  253.77   35.30 
   2  -3  -1  237.98   38.40 
  -3  -2  -1  299.27   22.90 
   3   2  -1  215.68   41.10 
   2  -3  -1  242.68   31.80 
   2  -3  -1  241.28   33.60 
   3   2  -1  278.27   31.80 
  -2   3  -1  266.47   34.80 
   2  -3  -1  229.48   28.70 
  -3  -2  -1  312.27   35.10 
  -2   3  -1  224.78   28.90 
   2  -3  -1  247.08   31.80 
   2  -3  -1  284.87   36.30 
   2  -3  -1  251.47   39.60 
   3   2  -1  288.87   48.20 
  -3  -2  -1  283.67   35.10 
  -3  -2  -1  290.67   34.10 
   3   2  -1  227.78   45.20 
   3   2  -1  278.87   35.10 
  -3  -2  -1  271.77   22.30 
  -2   3  -1  285.17   42.30 
   2  -3  -1  252.57   30.30 
   3   2  -1  255.67   33.60 
   2  -3  -1  254.97   20.80 
   3   2  -1  292.57   34.40 
   3   2  -1  278.67   39.90 
  -3  -2  -1  226.18   39.80 
  -2   3  -1  235.78   22.50 
  -2   3  -1  285.57   30.70 
   2  -3  -1  247.88   17.30 
   2  -3  -1  270.27   37.30 
  -2   3  -1  204.18   27.10 
   2  -3  -1  284.47   29.40 
  -3  -2  -1  289.57   38.40 
  -2   3  -1  257.27   31.40 
   2  -3  -1  235.78   33.20 
   2  -3  -1  241.88   30.70 
  -2   3  -1  256.67   45.90 
  -3  -2  -1  323.07   50.69 
   3   2  -1  300.97   32.70 
   3   2  -1  229.08   28.60 
  -2   3  -1  269.07   21.30 
  -3  -2  -1  219.08   42.80 
   3   2  -1  225.78   33.70 
   2  -3  -1  341.07   35.20 
   2  -3  -1  257.77   19.40 
  -3  -2  -1  249.58   33.60 
  -2   3  -1  251.27   25.80 
  -3  -2  -1  269.07   44.30 
  -2   3  -1  286.27   39.50 
   3   2  -1  370.86   55.59 
  -3  -2  -1  284.37   41.70 
  -3  -2  -1  278.27   36.50 
   2  -3  -1  312.77   42.40 
   2  -3  -1  211.88   40.10 
  -3  -2  -1  234.98   32.30 
   3   2  -1  260.67   32.30 
   3   2  -1  231.18   35.80 
  -2   3  -1  201.68   30.30 
   3   2  -1  296.77   42.50 
   2  -3  -1  247.98   28.20 
  -2   3  -1  263.27   35.60 
  -3  -2  -1  239.88   41.50 
  -3  -2  -1  315.67   45.10 
  -3  -2  -1  275.57   22.90 
  -2   3  -1  242.98   43.50 
  -2   3  -1  246.08   27.00 
   3   2  -1  323.17   41.80 
   3   2  -1  283.27   40.30 
   3   2   1  222.58   31.50 
   2  -3   1  311.67   36.90 
   3   2   1  246.18   40.90 
   3   2   1  307.87   39.00 
  -3  -2   1  248.48   44.60 
   3   2   1  290.07   41.00 
   2  -3   1  249.08   44.30 
   2  -3   1  290.37   30.30 
  -2   3   1  281.47   34.50 
   3   2   1  212.38   31.10 
   2  -3   1  336.77   30.20 
   2  -3   1  271.97   30.80 
  -3  -2   1  220.18   36.20 
   2  -3   1  262.47   34.00 
   2  -3   1  387.06   40.10 
   3   2   1  274.17   35.90 
   3   2   1  240.28   38.60 
   2  -3   1  251.07   44.00 
  -3  -2   1  261.87   30.30 
  -3  -2   1  229.48   36.50 
  -3  -2   1  212.68   32.20 
  -2   3   1  298.47   21.20 
   2  -3   1  344.57   43.40 
   3   2   1  174.78   36.40 
   2  -3   1  313.47   32.10 
   2  -3   1  221.18   32.30 
   3   2   1  235.88   28.80 
  -2   3   1  273.07   31.70 
  -2   3   1  309.67   36.10 
   3   2   1  218.88   33.90 
  -3  -2   1  307.27   40.50 
  -3  -2   1  253.57   47.10 
  -3  -2   1  329.17   42.10 
   3   2   1  298.77   36.10 
   2  -3   1  261.07   33.80 
  -3  -2   1  200.78   34.00 
   2  -3   1  340.57   35.30 
   2  -3   1  298.67   34.10 
  -2   3   1  282.57   33.70 
   2  -3   1  357.66   41.10 
  -3  -2   1  197.08   38.50 
  -3  -2   1  340.87   40.10 
  -2   3   1  294.97   35.50 
   3   2   1  241.08   28.70 
  -3  -2   1  243.08   32.80 
   2  -3   1  414.66   47.50 
  -3  -2   1  316.27   30.80 
   2  -3   1  293.37   30.60 
   2  -3   1  265.47   34.10 
  -2   3   1  265.27   32.80 
  -3  -2   1  197.48   35.90 
   2  -3   1  235.38   34.40 
   2  -3   1  277.87   31.00 
   3   2   1  232.08   32.20 
  -3  -2   1  184.98   38.10 
   3   2   1  154.18   34.00 
  -3  -2   1  211.98   38.90 
   3   2   1  307.67   40.60 
  -2   3   1  260.17   31.30 
  -3  -2   1  244.58   35.10 
   2  -3   1  252.67   27.80 
   2  -3   1  274.27   30.90 
  -3  -2   1  357.86   38.80 
  -2   3   1  290.17   34.10 
   3   2   1  256.17   25.60 
   3   2   1  245.78   31.20 
  -2   3   1  263.77   22.10 
   3   2   1  219.78   31.30 
  -3  -2   1  221.68   37.30 
  -2   3   1  280.27   43.00 
  -3  -2   1  231.08   39.30 
   3   2   1  285.37   35.80 
   3   2   1  225.68   41.50 
   2  -3   1  214.18   38.50 
  -2   3   1  343.17   43.00 
  -1   3  -1 1413.86   88.69 
  -3  -1  -1 1109.09   98.79 
   1  -3  -1 1276.47   89.49 
   1  -3  -1 1394.96   96.29 
   1  -3  -1 1336.57   83.19 
   3   1  -1 1192.48   84.69 
  -3  -1  -1 1323.07   85.99 
   1  -3  -1 1411.16   87.29 
  -3  -1  -1 1265.57  101.79 
  -1   3  -1 1483.95   95.09 
   3   1  -1 1203.78   93.49 
   1  -3  -1 1340.07   90.09 
   1  -3  -1 1338.57   82.29 
   1  -3  -1 1361.56   82.79 
  -3  -1  -1 1104.79   94.49 
   1  -3  -1 1235.08   92.29 
  -1   3  -1 1224.98   87.59 
   3   1  -1 1206.68   91.09 
   3   1  -1 1227.68   94.69 
   1  -3  -1 1317.27   83.29 
   1  -3  -1 1405.26   82.59 
  -3  -1  -1 1337.77   89.89 
  -1   3  -1 1393.26  101.99 
   3   1  -1 1315.57   90.89 
  -1   3  -1 1448.66   96.19 
   1  -3  -1 1292.37   83.19 
   1  -3  -1 1313.47   94.99 
  -3  -1  -1 1013.40   90.99 
  -3  -1  -1 1364.96   87.49 
  -3  -1  -1 1363.06   89.79 
  -1   3  -1 1338.17   88.99 
  -1   3  -1 1241.08   99.39 
   1  -3  -1 1284.87   89.69 
  -3  -1  -1 1214.38   86.69 
  -3  -1  -1 1398.26   99.69 
   1  -3  -1 1293.17   94.29 
   3   1  -1 1307.87   95.99 
   3   1  -1 1397.96   92.99 
   1  -3  -1 1335.57   92.19 
   3   1  -1 1299.97  102.29 
   1  -3  -1 1327.07   89.39 
  -3  -1  -1 1182.78   88.99 
  -3  -1  -1 1285.37   95.79 
   1  -3  -1 1385.66   88.09 
   3   1  -1 1223.28   93.19 
   3   1  -1 1229.08   94.89 
  -1   3  -1 1316.87   82.39 
  -1   3  -1 1342.67   91.69 
   1  -3  -1 1341.97   87.59 
  -1   3  -1 1296.47   90.09 
  -3  -1  -1 1263.47  101.99 
   3   1  -1 1335.57   90.69 
  -3  -1  -1 1254.77   90.89 
  -1   3  -1 1416.16   89.99 
  -1   3  -1 1423.46   90.89 
   3   1  -1 1279.07   90.09 
  -1   3  -1 1421.66   88.69 
  -3  -1  -1 1243.28  100.09 
  -3  -1  -1 1311.57   96.89 
   1  -3  -1 1376.06   96.39 
   3   1  -1 1144.39   91.89 
   1  -3  -1 1313.87   91.29 
  -3  -1  -1 1301.07   90.59 
  -3  -1  -1 1199.48   93.79 
   3   1  -1 1345.77   91.99 
   3   1  -1 1341.97   96.79 
  -1   3  -1 1310.27   88.19 
   1  -3  -1 1290.77   91.29 
   3   1  -1 1180.98   89.89 
   1  -3  -1 1288.47   89.19 
   1  -3  -1 1217.88   87.19 
  -3  -1  -1 1349.27   98.79 
  -3  -1  -1 1270.77   85.59 
  -3  -1  -1 1217.48   89.59 
  -3  -1  -1 1318.07   96.09 
   3   1  -1 1290.67   93.89 
   3   1  -1 1366.96  106.49 
  -1   3  -1 1321.97   90.29 
  -1   3  -1 1316.17   91.49 
  -1   3  -1 1335.47   88.39 
  -1   3  -1 1277.07   90.39 
   1  -3  -1 1271.67   81.39 
  -1   3  -1 1366.96   82.39 
   1  -3  -1 1364.96   87.69 
  -1   3  -1 1439.56   91.49 
  -1   3  -1 1315.17   97.99 
   3   1  -1 1284.67   91.59 
   3   1  -1 1160.88  100.19 
   3   1  -1 1247.08   93.29 
  -3  -1  -1 1228.98   94.99 
  -3  -1  -1 1348.67  100.19 
   1  -3  -1 1336.07   90.59 
  -3  -1  -1 1261.97   86.29 
   3   1   1 1463.55   99.59 
   1  -3   1 1336.47   88.49 
  -3  -1   1 1385.36   86.89 
  -3  -1   1 1229.78   98.89 
  -1   3   1 1289.27   90.89 
  -3  -1   1 1477.85  101.29 
  -1   3   1 1297.87   99.29 
   3   1   1 1264.97  100.29 
  -3  -1   1 1381.16   93.19 
   1  -3   1 1299.67   90.19 
   1  -3   1 1211.78   90.19 
   1  -3   1 1094.29   94.39 
  -1   3   1 1307.67   84.79 
  -1   3   1 1243.68   98.49 
  -1   3   1 1342.47   92.29 
   3   1   1 1358.56   89.59 
   3   1   1 1340.77   90.59 
  -3  -1   1 1145.49  101.49 
  -3  -1   1 1326.77   92.69 
  -3  -1   1 1246.38  101.19 
   1  -3   1 1010.60   89.39 
  -3  -1   1 1408.56   96.69 
   1  -3   1 1194.58   90.09 
   1  -3   1 1263.77   91.59 
   1  -3   1 1318.47   89.49 
  -3  -1   1 1336.87   86.69 
   1  -3   1 1277.77   92.69 
  -3  -1   1 1439.96   98.29 
   1  -3   1 1307.27   94.39 
   1  -3   1 1142.29   88.39 
   3   1   1 1372.06   90.59 
   3   1   1 1385.66   90.39 
  -3  -1   1 1278.27   97.19 
   1  -3   1 1253.77   88.29 
   1  -3   1 1276.07   95.29 
   1  -3   1 1215.18   95.49 
   3   1   1 1388.66   90.99 
  -3  -1   1 1303.17   85.39 
   1  -3   1 1146.19   96.99 
  -1   3   1 1266.67   82.79 
  -1   3   1 1384.06   92.09 
  -3  -1   1 1405.56   96.69 
  -3  -1   1 1369.96   96.89 
  -3  -1   1 1241.68   86.59 
   1  -3   1 1234.68   95.29 
   3   1   1 1309.27   89.19 
  -1   3   1 1313.17   86.59 
   1  -3   1 1156.88   99.29 
   3   1   1 1333.97   83.69 
   1  -3   1 1258.37   88.19 
  -1   3   1 1353.66   83.59 
  -3  -1   1 1236.18   99.29 
  -3  -1   1 1333.57   84.19 
   1  -3   1 1297.27   91.39 
  -3  -1   1 1468.25   93.79 
   3   1   1 1125.49   97.59 
   1  -3   1 1282.87   92.29 
  -3  -1   1 1242.08   97.59 
   1  -3   1 1307.57   91.29 
  -3  -1   1 1291.17   93.29 
  -1   3   1 1284.07   83.29 
  -1   3   1 1307.27   87.29 
   3   1   1 1443.56   86.69 
   3   1   1 1406.66   93.29 
   3   1   1 1139.99   87.29 
  -1   3   1 1297.17   84.59 
  -1   3   1 1327.77   92.49 
  -1   3   1 1321.77   79.39 
   3   1   1 1395.46   99.09 
   3   1   1 1393.76   92.89 
   3   1   1 1367.86   85.89 
   3   1   1 1378.66   93.29 
   1  -3   1 1396.16   83.89 
  -3  -1   1 1272.87   95.09 
   1  -3   1 1327.37   91.89 
   1  -3   1 1323.67   90.69 
   3   1   1 1295.57   98.29 
  -3  -1   1 1427.56   92.09 
   1  -3   1 1229.48   88.99 
   3   1   1 1261.07   97.39 
   1  -3   1 1386.26   88.59 
   3   1   1 1225.18   98.09 
  -3  -1   1 1286.47   89.99 
  -1   3   1 1351.36   86.89 
   3   1   1 1366.66   98.29 
  -1   3   1 1222.18   90.79 
  -3  -1   1 1269.67   92.69 
  -1   3   1 1343.07   83.79 
   3   1   1 1298.37   97.99 
  -3  -1   1 1385.46   92.59 
  -3   0  -1  132.59   26.70 
   3   0  -1   55.29   15.10 
   0   3  -1   99.09   13.30 
   0  -3  -1   80.89   14.20 
   3   0  -1   83.19   19.60 
   3   0  -1   66.29   17.70 
   0  -3  -1  102.79   16.30 
   3   0  -1  108.79   19.80 
   0   3  -1  117.89   23.40 
   0   3  -1  117.89   21.90 
  -3   0  -1   73.49   23.40 
   3   0  -1  117.39   19.70 
   0   3  -1   76.19   17.50 
   0   3  -1   98.29   23.70 
   3   0  -1   97.89   21.20 
   0  -3  -1  120.09   11.40 
  -3   0  -1   86.49   20.80 
   0  -3  -1   91.09   20.40 
   0  -3  -1  105.89   19.30 
   0   3  -1   72.59   19.60 
   3   0  -1  107.89   10.50 
   0   3  -1  112.49   23.30 
   0   3  -1   96.09   18.70 
   0  -3  -1  102.39   18.60 
   0  -3  -1  114.69   17.70 
   0   3  -1  116.59   19.70 
  -3   0  -1   77.59   14.60 
   0  -3  -1   87.79   14.90 
   3   0  -1  100.09   18.90 
   0  -3  -1  104.69   21.80 
   3   0  -1  129.69   21.60 
   0  -3  -1  124.99   24.90 
   0   3  -1  121.79   14.30 
  -3   0  -1  110.89   17.90 
  -3   0  -1   86.99   21.30 
  -3   0  -1  126.99   19.50 
   0   3  -1  111.59   18.80 
   3   0  -1  111.29   21.90 
   0  -3  -1   80.29   21.80 
   3   0  -1  124.79   22.50 
   0  -3  -1   99.79   15.00 
   0  -3  -1  105.79   21.30 
   0  -3  -1  116.79   14.70 
   0  -3  -1   90.79   15.80 
   3   0  -1   70.99   20.40 
   0   3  -1  101.29   17.10 
  -3   0  -1   60.19   18.00 
  -3   0  -1  124.19   19.70 
   0   3  -1  152.68   22.40 
   0  -3  -1  121.99   19.80 
  -3   0  -1  131.69   26.90 
   0   3  -1   61.09   17.80 
   0  -3  -1   91.99   18.90 
   0   3  -1   94.89   19.90 
   3   0  -1  100.59   20.00 
   3   0  -1   85.09   19.80 
   0  -3  -1   82.09   12.40 
  -3   0  -1  101.89   18.30 
   0   3  -1   85.99   15.80 
   0   3  -1   82.59   16.60 
   0  -3  -1  115.69   15.70 
  -3   0  -1  110.49   17.50 
   0  -3  -1   59.19   12.50 
  -3   0  -1   61.59   19.40 
  -3   0  -1  102.19   18.00 
   3   0  -1  117.59   13.90 
  -3   0  -1   90.59   16.20 
   0   3  -1  112.89   20.50 
  -3   0  -1   63.59   14.60 
  -3   0  -1  101.99   16.80 
   0  -3  -1  113.39   20.80 
   3   0  -1  112.89   20.20 
  -3   0  -1  103.69   16.70 
   0  -3  -1  130.49   15.30 
  -3   0  -1   73.19   19.50 
   3   0  -1  120.39   28.40 
   3   0  -1   81.79   22.00 
  -3   0  -1  135.29   24.40 
   0  -3  -1   79.29   16.40 
   0  -3  -1   91.99   21.70 
   0  -3  -1  101.99    9.00 
   3   0  -1   79.79   17.80 
   3   0  -1   57.29   14.00 
   0  -3  -1  130.59   21.40 
   0   3  -1   89.19   18.30 
   0   3  -1   88.09   22.20 
  -3   0  -1  103.09   22.10 
   0   3  -1  125.29   23.80 
   0   3  -1  149.49   23.00 
  -3   0  -1   96.59   18.30 
   3   0  -1   88.69   19.50 
   0  -3  -1  127.89   21.40 
   3   0  -1   88.29   16.30 
   3   0  -1   82.89   18.10 
   3   0  -1  105.69   21.40 
  -3   0  -1   78.59   21.90 
   0   3   1   77.89   13.60 
   0  -3   1   91.49   19.40 
   0   3   1   90.69   13.10 
   3   0   1   82.49   15.20 
   3   0   1  192.18   26.80 
   3   0   1  163.98   27.00 
   3   0   1   82.69   21.70 
   0   3   1   79.29   12.10 
  -3   0   1  105.29   19.40 
   3   0   1   96.99   16.70 
  -3   0   1  114.49   19.90 
   0  -3   1  125.99   25.80 
   0  -3   1   49.80   15.40 
   3   0   1  103.09   18.00 
  -3   0   1   87.69   17.30 
  -3   0   1   96.09   23.80 
   3   0   1   97.89   17.40 
   0   3   1  123.59   15.10 
   0   3   1   69.59   16.50 
  -3   0   1  104.89   17.00 
   3   0   1  122.29   26.60 
  -3   0   1  101.29   20.90 
   0  -3   1  102.29   19.10 
   0  -3   1   63.39   16.70 
   0   3   1   95.39   18.90 
   0   3   1   89.59   13.30 
   0   3   1   87.09   16.80 
   0  -3   1   87.59   19.00 
   0  -3   1   86.59   17.10 
   3   0   1  128.79   15.30 
   0   3   1  103.99   15.50 
  -3   0   1  107.19   18.40 
  -3   0   1  112.59   20.60 
   3   0   1   66.89   17.30 
   0   3   1  111.29   20.00 
   0  -3   1  138.19   21.00 
   0  -3   1  108.69   22.00 
  -3   0   1   96.69   18.10 
   3   0   1  100.89   18.30 
   0  -3   1   91.09   21.00 
   3   0   1  100.39   17.40 
   0  -3   1  117.19   18.40 
   0  -3   1   92.09   21.80 
   3   0   1   73.39   18.10 
  -3   0   1   95.29   18.20 
  -3   0   1  100.69   17.90 
  -3   0   1   99.29    7.60 
   0  -3   1   77.09   16.90 
  -3   0   1  124.09   24.40 
   3   0   1  170.58   23.90 
   0  -3   1  101.59   21.10 
   0  -3   1   99.49   20.20 
   3   0   1  131.69   28.30 
   0  -3   1  124.09   23.00 
   3   0   1  113.99   19.20 
   0  -3   1  106.89   19.60 
   3   0   1  131.59   19.20 
   0  -3   1  132.09   21.80 
  -3   0   1   87.39   23.10 
   0  -3   1   83.19   17.90 
   0   3   1   93.79   20.40 
  -3   0   1   83.89   19.20 
   3   0   1   79.89   24.00 
   0  -3   1  111.89   23.40 
  -3   0   1   76.39   15.40 
  -3   0   1   97.29   17.90 
   0  -3   1  118.49   24.00 
   0   3   1   94.09   16.20 
   0   3   1  121.89   14.10 
   0  -3   1  137.39   20.10 
  -3   0   1   77.69   19.40 
   3   0   1   97.59   16.10 
   0  -3   1   99.49   19.50 
  -3   0   1   87.29   20.80 
  -3   0   1  105.59   22.20 
   0   3   1   91.09   15.80 
   0  -3   1  123.89   19.80 
   0  -3   1  116.39   23.50 
   3   0   1   98.49   15.50 
   3   0   1  120.49   14.50 
   0  -3   1   93.79   17.20 
   0   3   1  139.69   27.50 
   0   3   1  112.79   16.40 
   0  -3   1  114.09   21.90 
  -1  -3  -1 1216.38   95.79 
   1   3  -1 1295.57   95.59 
  -1  -3  -1 1250.87   92.19 
  -3   1  -1 1264.97   99.89 
  -1  -3  -1 1226.78   92.99 
  -1  -3  -1 1370.26   80.89 
   1   3  -1 1288.87   92.79 
  -1  -3  -1 1349.96   92.09 
  -3   1  -1 1243.88   89.59 
   3  -1  -1 1374.76   79.09 
  -1  -3  -1 1231.68   88.69 
  -3   1  -1 1346.17   90.89 
   3  -1  -1 1290.17   85.79 
   3  -1  -1 1403.26   91.79 
  -1  -3  -1 1336.07   92.39 
  -1  -3  -1 1188.88   93.49 
  -3   1  -1 1303.97   89.69 
   1   3  -1 1272.37   92.99 
   3  -1  -1 1334.07   87.19 
  -1  -3  -1 1275.87   88.89 
   3  -1  -1 1329.77   92.09 
   3  -1  -1 1349.16   93.19 
  -1  -3  -1 1294.47   90.59 
  -3   1  -1 1280.87   99.59 
  -3   1  -1 1330.07  100.39 
  -1  -3  -1 1320.77   89.59 
   1   3  -1 1214.88   91.19 
   3  -1  -1 1291.17   87.59 
  -3   1  -1 1322.67   86.49 
  -1  -3  -1 1309.77   82.79 
   3  -1  -1 1491.75   94.79 
   3  -1  -1 1253.37   91.69 
  -1  -3  -1 1279.47   92.69 
   1   3  -1 1337.67   87.79 
   1   3  -1 1142.49   92.19 
  -1  -3  -1 1296.97   95.39 
   1   3  -1 1200.28   92.39 
   3  -1  -1 1447.96   90.19 
  -1  -3  -1 1227.48   91.19 
   3  -1  -1 1383.26   86.49 
   1   3  -1 1290.27   99.19 
   3  -1  -1 1483.45   96.89 
  -1  -3  -1 1282.47   90.39 
   1   3  -1 1371.56   94.49 
   3  -1  -1 1223.08   92.39 
   3  -1  -1 1315.07   87.59 
  -3   1  -1 1368.46   89.59 
  -3   1  -1 1267.77   80.89 
   3  -1  -1 1339.57   93.39 
   3  -1  -1 1455.05   98.99 
   1   3  -1 1303.27   92.39 
  -1  -3  -1 1381.66   96.09 
  -1  -3  -1 1359.36   83.09 
  -3   1  -1 1496.45   95.29 
   1   3  -1 1168.28   93.29 
  -1  -3  -1 1261.47   79.99 
  -3   1  -1 1398.16   89.79 
   1   3  -1 1280.07   96.39 
  -3   1  -1 1342.27   85.59 
   3  -1  -1 1286.47   95.19 
  -3   1  -1 1310.57   85.29 
  -1  -3  -1 1187.08   97.19 
  -1  -3  -1 1215.28   89.69 
   1   3  -1 1307.97   88.19 
   3  -1  -1 1257.77   84.99 
  -1  -3  -1 1312.47   90.09 
  -1  -3  -1 1359.76   80.09 
  -1  -3  -1 1243.18   93.49 
   3  -1  -1 1378.06   97.29 
   3  -1  -1 1343.07   92.09 
  -1  -3  -1 1183.88   86.39 
   3  -1  -1 1324.17  103.59 
   3  -1  -1 1515.35   91.29 
  -1  -3  -1 1260.27   93.39 
   3  -1  -1 1352.06   92.29 
  -3   1  -1 1354.96   91.59 
  -1  -3  -1 1308.07   95.59 
   1   3  -1 1383.36   98.89 
   1   3  -1 1279.77   98.59 
  -3   1  -1 1228.48   98.29 
   3  -1  -1 1379.16   82.09 
  -3   1  -1 1299.37   99.79 
   3  -1  -1 1337.07   86.99 
   1   3  -1 1232.28   97.69 
   1   3  -1 1216.18   94.89 
  -3   1  -1 1238.08   86.19 
   1   3  -1 1292.87   95.99 
   1   3  -1 1190.88   86.79 
   1   3  -1 1285.37   93.49 
   1   3  -1 1237.68   87.99 
  -3   1  -1 1257.47   90.29 
  -3   1  -1 1405.16   90.99 
   3  -1  -1 1415.46   92.49 
  -3   1  -1 1362.36   93.49 
  -1  -3   1 1483.05   99.29 
   3  -1   1 1373.56   91.39 
   1   3   1 1314.17   91.59 
   1   3   1 1346.77   80.39 
   3  -1   1 1267.77   91.89 
  -3   1   1 1203.48   90.99 
  -1  -3   1 1223.78   95.49 
  -1  -3   1 1317.07   94.89 
   3  -1   1 1259.77   87.59 
   3  -1   1 1265.97   89.69 
   3  -1   1 1320.87   87.39 
   1   3   1 1312.37   94.29 
  -1  -3   1 1197.18   93.09 
   3  -1   1 1237.98   90.49 
   3  -1   1 1286.47  103.19 
   3  -1   1 1432.16   86.49 
   3  -1   1 1284.17   90.99 
   1   3   1 1410.06   91.09 
  -3   1   1 1269.37   95.19 
   3  -1   1 1268.97   89.39 
  -1  -3   1 1307.07   93.19 
  -1  -3   1 1359.46   94.19 
  -1  -3   1 1342.07   87.49 
   3  -1   1 1241.98   89.29 
  -3   1   1 1184.78   89.39 
  -1  -3   1 1339.97   89.89 
  -1  -3   1 1445.86   95.19 
   1   3   1 1302.17   80.49 
  -1  -3   1 1233.38   87.99 
  -1  -3   1 1185.18   88.79 
   3  -1   1 1325.97   89.29 
   1   3   1 1334.27   85.49 
  -1  -3   1 1446.56   97.49 
   1   3   1 1322.17   92.39 
  -3   1   1 1323.77   86.09 
  -1  -3   1 1168.68   94.39 
  -3   1   1 1254.27   94.89 
  -3   1   1 1308.67   83.89 
  -1  -3   1 1234.48   93.89 
   1   3   1 1337.17   90.69 
   3  -1   1 1274.07   90.29 
   1   3   1 1414.56   95.39 
   1   3   1 1374.96   90.69 
   1   3   1 1392.06   82.49 
  -3   1   1 1245.88   87.59 
  -1  -3   1 1367.26   97.79 
   3  -1   1 1209.58  100.49 
  -1  -3   1 1385.06   89.49 
   1   3   1 1359.56   80.39 
  -3   1   1 1295.27   84.49 
   3  -1   1 1272.87   85.59 
   3  -1   1 1245.28   85.19 
   3  -1   1 1249.07  101.59 
   1   3   1 1336.07   88.29 
  -1  -3   1 1496.95   94.89 
  -3   1   1 1238.08   94.79 
   1   3   1 1352.56   95.59 
  -1  -3   1 1207.78   94.59 
   1   3   1 1273.87   88.29 
   3  -1   1 1359.96   92.19 
  -3   1   1 1203.48   89.79 
  -1  -3   1 1345.67   95.29 
  -3   1   1 1296.97   97.69 
   1   3   1 1339.67   88.89 
   3  -1   1 1292.37   91.39 
  -1  -3   1 1426.46   93.89 
   3  -1   1 1238.38   84.69 
  -1  -3   1 1310.67   95.79 
   1   3   1 1265.47   89.19 
   3  -1   1 1253.17   94.89 
   3  -1   1 1340.17   87.79 
  -3   1   1 1365.26   93.89 
  -3   1   1 1239.88   93.99 
  -3   1   1 1230.08   85.29 
   3  -1   1 1275.07   89.49 
   1   3   1 1401.66   80.89 
  -3   1   1 1206.58   90.19 
  -1  -3   1 1285.27   88.59 
  -1  -3   1 1199.38   97.59 
  -1  -3   1 1330.27   96.99 
   3  -1   1 1148.29   99.89 
  -3   1   1 1297.97   84.79 
  -2  -3  -1  320.77   30.70 
  -3   2  -1  206.18   40.80 
   3  -2  -1  255.67   36.70 
   2   3  -1  298.57   33.30 
   3  -2  -1  173.78   32.90 
   2   3  -1  300.57   37.60 
  -2  -3  -1  292.57   31.80 
  -2  -3  -1  280.17   34.60 
   3  -2  -1  269.37   43.00 
   3  -2  -1  270.27   22.00 
   3  -2  -1  203.88   32.60 
   3  -2  -1  227.28   22.00 
  -3   2  -1  246.28   30.30 
   2   3  -1  231.38   43.20 
   3  -2  -1  268.37   36.10 
   3  -2  -1  240.18   20.10 
   3  -2  -1  251.57   39.80 
   3  -2  -1  246.58   20.60 
   2   3  -1  213.18   29.30 
  -2  -3  -1  305.07   40.70 
   3  -2  -1  189.88   29.90 
   2   3  -1  259.87   36.80 
  -3   2  -1  287.97   31.00 
  -2  -3  -1  346.77   41.80 
   3  -2  -1  237.18   19.30 
  -2  -3  -1  300.27   29.50 
  -2  -3  -1  254.67   34.60 
   2   3  -1  287.57   35.50 
  -2  -3  -1  256.67   34.60 
  -2  -3  -1  313.47   41.50 
  -3   2  -1  224.48   30.70 
   2   3  -1  301.47   31.90 
   2   3  -1  334.47   37.30 
  -2  -3  -1  273.87   34.40 
   3  -2  -1  235.78   26.90 
   2   3  -1  242.38   38.60 
   3  -2  -1  244.48   32.10 
  -2  -3  -1  386.36   44.50 
  -2  -3  -1  330.67   35.80 
   3  -2  -1  288.07   32.50 
   3  -2  -1  245.08   33.30 
   3  -2  -1  268.37   34.30 
   2   3  -1  306.17   42.30 
   3  -2  -1  168.48   20.90 
  -3   2  -1  262.17   30.20 
  -2  -3  -1  307.97   41.90 
  -3   2  -1  241.08   30.40 
  -2  -3  -1  363.16   49.30 
  -2  -3  -1  251.27   34.90 
  -2  -3  -1  244.68   31.90 
  -2  -3  -1  299.77   41.10 
  -3   2  -1  216.08   28.30 
   2   3  -1  229.68   36.40 
   2   3  -1  213.98   33.90 
   2   3  -1  298.87   40.40 
  -3   2  -1  248.08   34.20 
  -2  -3  -1  286.97   39.20 
   2   3  -1  246.18   37.70 
  -2  -3  -1  344.27   37.90 
   3  -2  -1  273.77   34.80 
   3  -2  -1  303.37   34.10 
   2   3  -1  322.07   41.70 
   3  -2  -1  288.17   34.20 
  -3   2  -1  222.08   31.90 
   3  -2  -1  229.08   31.50 
   2   3  -1  292.57   38.20 
   3  -2  -1  387.16   51.79 
   3  -2  -1  251.27   31.80 
   2   3  -1  426.56   46.00 
   2   3  -1  314.77   47.10 
   3  -2  -1  212.58   31.90 
   2   3  -1  206.48   37.70 
  -3   2  -1  220.98   42.30 
   2   3  -1  230.88   42.30 
  -3   2  -1  240.98   21.10 
  -2  -3  -1  311.17   39.50 
  -3   2  -1  273.87   35.20 
  -2  -3  -1  283.97   40.70 
  -3   2  -1  223.78   30.60 
  -3   2  -1  205.08   38.50 
  -3   2   1  270.07   41.60 
   2   3   1  204.78   30.60 
   2   3   1  266.87   35.60 
   3  -2   1  309.57   32.50 
  -3   2   1  305.67   35.20 
  -3   2   1  265.17   18.30 
   3  -2   1  301.57   29.70 
  -3   2   1  293.47   18.90 
  -2  -3   1  225.38   28.10 
   2   3   1  213.08   32.80 
  -2  -3   1  257.57   30.90 
  -3   2   1  281.17   24.10 
  -3   2   1  331.97   37.90 
  -3   2   1  299.07   29.60 
  -3   2   1  243.08   39.60 
   3  -2   1  329.17   36.50 
   2   3   1  193.48   35.60 
   3  -2   1  268.97   22.50 
   3  -2   1  311.57   40.50 
   3  -2   1  259.97   34.70 
   2   3   1  247.58   39.60 
   3  -2   1  356.66   40.60 
  -3   2   1  209.48   37.90 
   2   3   1  227.68   30.70 
   3  -2   1  349.37   43.70 
   3  -2   1  292.57   31.90 
  -2  -3   1  275.67   37.00 
   3  -2   1  238.68   29.90 
  -2  -3   1  210.58   39.30 
   3  -2   1  273.97   34.20 
  -3   2   1  321.57   33.50 
   2   3   1  274.87   36.70 
  -2  -3   1  180.88   36.20 
   3  -2   1  273.37   43.10 
   3  -2   1  283.37   22.70 
   3  -2   1  242.08   43.10 
   3  -2   1  306.77   32.20 
  -2  -3   1  280.27   32.20 
  -3   2   1  244.68   32.40 
  -2  -3   1  226.58   40.60 
  -3   2   1  317.77   46.10 
  -2  -3   1  231.48   40.90 
  -2  -3   1  266.57   37.90 
  -2  -3   1  319.07   40.70 
  -2  -3   1  221.58   36.80 
  -2  -3   1  222.48   35.40 
  -2  -3   1  295.87   43.60 
  -3   2   1  260.27   31.30 
   3  -2   1  359.16   54.19 
  -3   2   1  273.67   18.90 
   3  -2   1  260.17   46.10 
   3  -2   1  293.17   24.10 
   3  -2   1  261.17   33.50 
  -2  -3   1  216.08   36.60 
  -2  -3   1  246.58   42.80 
   2   3   1  155.98   27.80 
   2   3   1  258.87   39.60 
   2   3   1  250.47   35.80 
  -3   2   1  297.27   18.80 
  -2  -3   1  248.88   35.60 
  -2  -3   1  201.88   36.20 
   3  -2   1  290.87   21.70 
  -2  -3   1  226.28   36.00 
  -2  -3   1  216.48   30.80 
  -2  -3   1  255.87   29.80 
   2   3   1  263.57   38.50 
   2   3   1  223.18   33.10 
   2   3   1  255.37   27.50 
   3  -2   1  318.47   36.50 
   2   3   1  252.07   41.10 
   3  -2   1  280.47   35.00 
  -3   2   1  288.37   29.10 
  -2  -3   1  237.08   29.20 
  -2  -3   1  239.18   29.80 
  -2  -3   1  231.38   32.60 
   3  -2   1  399.26   40.90 
  -2  -3   1  354.16   46.20 
  -3   2   1  269.97   33.80 
   2   3   1  199.28   30.80 
  -3   3  -1    3.00    7.50 
  -3  -3  -1   -4.50   11.10 
   3  -3  -1    2.80   12.50 
  -3  -3  -1   -9.90   10.00 
   3  -3  -1    4.90    8.50 
  -3  -3  -1   -4.70    9.70 
   3   3  -1   -1.50    7.80 
  -3  -3  -1  -14.80    6.80 
  -3  -3  -1   14.30    5.30 
   3  -3  -1    3.90    5.70 
   3  -3  -1   -4.20    7.00 
   3  -3  -1    2.30    7.30 
  -3   3  -1   -2.90   12.60 
  -3  -3  -1   -1.20    9.00 
  -3  -3  -1    5.10   14.30 
  -3  -3  -1    6.20   14.40 
   3  -3  -1    1.20    9.40 
   3  -3  -1    7.70   11.90 
  -3  -3  -1    6.60   13.50 
  -3   3  -1    5.30    4.60 
   3   3  -1    0.30   16.80 
  -3  -3  -1    8.60    4.20 
  -3  -3  -1   12.80   15.10 
   3  -3  -1   25.70   21.20 
   3   3  -1   -2.90   15.10 
  -3  -3  -1    8.00    8.70 
  -3   3  -1    6.50    7.30 
   3   3  -1    6.30   13.60 
   3  -3  -1   10.80    8.70 
   3   3  -1   -0.80   14.40 
   3  -3  -1    7.10    9.40 
   3  -3  -1    7.80   11.40 
  -3  -3  -1  -10.80    7.30 
  -3   3  -1   -8.10   11.60 
  -3  -3  -1   -3.50    6.60 
   3   3  -1   -2.50    7.60 
   3  -3  -1    4.50    5.80 
  -3   3  -1   -1.20    5.50 
   3   3  -1   11.30    9.20 
  -3  -3  -1   -7.60    9.80 
   3   3  -1    5.60    9.20 
   3   3  -1    4.10   10.50 
  -3   3  -1    2.00    7.80 
   3   3  -1    7.40   11.80 
  -3   3  -1    5.70   10.20 
  -3  -3  -1    4.90   14.40 
   3   3  -1   31.40   15.70 
  -3   3  -1    4.00    9.80 
  -3  -3  -1   10.30   12.00 
  -3  -3  -1   15.40   14.50 
  -3  -3  -1    0.80    4.30 
  -3  -3  -1   -1.80   13.50 
  -3  -3  -1   11.30   11.10 
   3   3  -1   27.70   12.60 
   3   3  -1  -14.40    9.50 
   3   3  -1   -7.00   10.70 
  -3   3  -1   -9.30   12.70 
   3  -3  -1    6.60    8.60 
  -3  -3  -1   -7.50   10.80 
  -3   3  -1   -7.90   10.80 
   3  -3  -1   -3.10    8.30 
   3   3  -1    9.50    9.60 
   3  -3  -1   -1.40    7.00 
   3  -3  -1   12.60   17.00 
   3   3  -1    7.10    8.50 
   3   3  -1    1.90    9.90 
  -3   3  -1    1.20    6.90 
   3   3  -1   -3.70    9.10 
   3   3  -1   -1.20    8.60 
  -3  -3  -1   17.60   11.70 
   3  -3  -1   16.40    9.20 
   3  -3  -1    4.20    8.10 
  -3   3  -1   -7.50    5.90 
   3   3  -1   16.80   12.90 
   3   3  -1    7.70   13.80 
  -3  -3  -1   -1.20    8.30 
  -3  -3  -1   -5.40    7.70 
   3  -3  -1    5.30    7.00 
  -3   3  -1    4.60    8.30 
  -3   3  -1    2.80    8.60 
  -3  -3  -1    7.20    4.10 
   3  -3  -1    3.30   10.20 
   3  -3   1    9.30    9.10 
   3  -3   1   10.10    8.60 
   3  -3   1   10.90   11.60 
   3   3   1   -4.20    8.60 
   3  -3   1    2.90    5.70 
   3   3   1  -10.10    7.30 
  -3  -3   1   -4.10    6.30 
   3   3   1    1.80   13.50 
  -3  -3   1    7.30   10.40 
  -3   3   1   15.00   10.10 
  -3  -3   1    0.70   14.50 
   3  -3   1   45.00   24.10 
   3  -3   1    8.70    8.40 
   3  -3   1   31.30   17.20 
   3  -3   1    9.60    9.80 
  -3  -3   1    6.30   10.00 
   3  -3   1   36.20   21.70 
  -3  -3   1   -1.20   11.40 
   3  -3   1    0.90    5.40 
  -3   3   1    6.10    8.20 
  -3  -3   1    1.00    8.80 
  -3  -3   1   -4.00   11.80 
   3  -3   1   11.00    9.80 
  -3  -3   1   18.30   13.10 
   3  -3   1    0.10    8.00 
  -3  -3   1    9.90   10.80 
   3  -3   1    1.20   10.30 
   3  -3   1    2.70   10.50 
  -3  -3   1   18.60   14.10 
  -3   3   1    1.50    7.50 
  -3  -3   1    7.80   18.10 
  -3   3   1   -0.70    8.60 
  -3   3   1   24.90   12.50 
   3  -3   1    0.80    8.70 
  -3   3   1   -2.30    8.20 
   3  -3   1   -5.70    6.50 
  -3  -3   1   -6.70   13.10 
  -3   3   1   -9.90    9.00 
  -3   3   1   16.80   17.00 
  -3  -3   1   -3.10    7.60 
   3   3   1   -0.70    8.60 
   3   3   1   21.70   12.30 
  -3  -3   1   15.10   13.60 
  -3  -3   1    4.70   11.70 
   3   3   1   -2.60    9.30 
   3   3   1  -14.70    7.50 
   3  -3   1    5.30   14.70 
   3   3   1   -0.60   14.10 
   3  -3   1   -2.80    5.30 
   3   3   1    4.50    9.00 
  -3  -3   1   10.00   12.30 
  -3  -3   1    9.70    9.50 
   3   3   1    6.10    4.10 
   3  -3   1   -3.40    7.40 
   3   3   1    2.60   14.80 
   3   3   1    8.00   12.60 
  -3  -3   1  -10.00   10.40 
   3  -3   1  -11.30    5.50 
   3  -3   1   11.60    8.80 
   3   3   1    0.80    7.00 
   3  -3   1    7.00   10.30 
   3   3   1   -3.80   10.50 
   3   3   1    5.10    9.50 
  -3  -3   1   14.70   13.40 
   3  -3   1   -5.00   10.30 
   3  -3   1   -7.00    5.90 
   3   3   1   12.50   12.50 
   3  -3   1   24.20   20.70 
  -3   3   1  -10.20    7.80 
  -3   3   1    4.90   15.40 
   3   3   1   11.60   13.80 
  -3   3   1    1.90    4.90 
  -3   3   1    2.80    7.00 
  -3  -3   1  -17.30    8.10 
  -3  -3   1   -4.20    7.00 
  -3  -3   1  -17.80   13.80 
   3   3   1   -2.60    7.70 
   3  -3   1    9.40    5.50 
   3  -3   1    2.30    4.50 
  -3  -3   1    1.60    9.70 
   4   3  -1 2043.10  139.59 
  -4  -3  -1 1940.21  137.99 
  -4  -3  -1 1948.91  150.08 
   4   3  -1 1966.20  139.69 
   4   3  -1 2025.00  146.59 
   4   3  -1 1772.92  141.99 
  -4  -3  -1 1987.90  155.58 
  -3   4  -1 1933.41  132.39 
   3  -4  -1 1805.22  130.19 
   3  -4  -1 1800.62  129.59 
   4   3  -1 2082.99  133.39 
   3  -4  -1 1911.01  136.49 
  -3   4  -1 1793.22  142.79 
  -3   4  -1 2012.70  119.59 
   4   3  -1 2012.90  131.09 
  -4  -3  -1 1685.03  146.39 
  -4  -3  -1 1939.71  124.19 
   3  -4  -1 1884.21  129.89 
   3  -4  -1 1835.22  139.99 
   4   3  -1 1969.90  134.59 
  -4  -3  -1 1842.22  134.29 
  -3   4  -1 1893.11  146.09 
   4   3  -1 2059.19  138.69 
  -3   4  -1 1894.91  153.88 
   4   3  -1 1955.90  133.69 
   3  -4  -1 1821.72  148.99 
  -3   4  -1 1989.20  130.09 
   3  -4  -1 1931.91  130.99 
   3  -4  -1 1930.51  145.89 
  -3   4  -1 2010.20  127.49 
  -4  -3  -1 2018.20  156.08 
  -3   4  -1 2050.99  126.59 
  -4  -3  -1 2106.59  149.29 
  -4  -3  -1 2005.10  138.29 
  -3   4  -1 1911.91  132.89 
   3  -4  -1 1921.71  138.59 
  -4  -3  -1 2001.10  139.69 
   4   3  -1 2005.80  143.99 
  -4  -3  -1 1782.82  144.39 
   3  -4  -1 1992.30  134.69 
   4   3  -1 2236.98  148.29 
  -4  -3  -1 1982.90  141.59 
  -4  -3  -1 2036.30  123.99 
   3  -4  -1 1982.70  119.89 
   4   3  -1 2085.49  162.68 
   4   3  -1 1903.31  140.69 
   4   3  -1 1908.81  141.99 
   3  -4  -1 1824.92  139.79 
   4   3  -1 1967.10  153.78 
  -4  -3  -1 2039.20  139.69 
  -4  -3  -1 1924.21  134.49 
   3  -4  -1 1915.81  137.09 
   4   3  -1 1957.30  133.29 
   3  -4  -1 2007.10  122.09 
   4   3  -1 1959.50  155.48 
  -4  -3  -1 1838.82  146.79 
  -4  -3  -1 2018.80  123.89 
  -4  -3  -1 2028.20  138.69 
   4   3  -1 1936.81  133.99 
   3  -4  -1 1832.52  135.29 
   3  -4  -1 1884.91  127.29 
   4   3  -1 1786.62  140.69 
  -3   4  -1 2022.10  137.99 
  -4  -3  -1 1756.62  135.29 
   3  -4  -1 2098.59  136.49 
   4   3  -1 2037.10  135.19 
   3  -4  -1 1873.81  133.09 
   3  -4  -1 2009.80  146.69 
  -3   4  -1 2108.79  141.19 
   4   3  -1 2199.48  162.78 
  -3   4  -1 1735.83  152.08 
  -3   4  -1 1882.81  133.59 
  -4  -3  -1 1897.51  139.99 
  -4  -3  -1 1952.30  138.09 
  -3   4  -1 2038.20  138.99 
   4   3  -1 2081.39  146.29 
   3  -4  -1 1833.92  129.99 
  -3   4  -1 1966.10  137.49 
  -3   4  -1 1975.60  133.59 
  -4  -3  -1 2014.10  151.68 
  -4  -3  -1 1931.71  146.49 
   3  -4   1 1927.21  137.99 
   4   3   1 2008.00  142.49 
  -4  -3   1 2002.70  141.69 
   4   3   1 1874.91  137.69 
   3  -4   1 2001.50  141.39 
   3  -4   1 1939.51  141.59 
  -4  -3   1 2030.50  130.39 
   3  -4   1 1867.11  130.09 
   4   3   1 1990.40  137.09 
   4   3   1 1801.02  139.09 
   3  -4   1 1966.00  154.08 
  -3   4   1 1818.42  135.49 
   3  -4   1 1837.72  135.79 
   4   3   1 1878.11  124.29 
   4   3   1 1829.52  136.09 
  -4  -3   1 1985.50  148.19 
   3  -4   1 1889.01  136.99 
   3  -4   1 2038.90  157.68 
  -4  -3   1 1977.90  140.19 
   3  -4   1 1971.30  128.99 
  -4  -3   1 1806.02  135.89 
  -4  -3   1 1987.20  143.19 
   4   3   1 1960.70  153.98 
   3  -4   1 1919.91  143.69 
   3  -4   1 2070.39  131.19 
  -4  -3   1 1944.01  134.39 
   4   3   1 2026.50  142.19 
  -3   4   1 1881.91  136.99 
   3  -4   1 2038.50  139.19 
  -3   4   1 1959.50  138.29 
  -3   4   1 2080.29  136.89 
  -3   4   1 2054.09  135.59 
  -3   4   1 2030.00  152.58 
   3  -4   1 1827.32  136.69 
   3  -4   1 2041.30  139.39 
  -3   4   1 1920.41  149.09 
   4   3   1 1991.50  153.88 
  -4  -3   1 2167.18  155.88 
   3  -4   1 1804.62  125.89 
  -3   4   1 1937.01  124.79 
   4   3   1 1894.31  141.19 
  -3   4   1 1963.20  136.39 
   4   3   1 1962.50  143.59 
  -4  -3   1 1902.51  147.79 
   3  -4   1 1924.71  147.79 
  -4  -3   1 2082.79  143.09 
  -4  -3   1 1806.62  148.09 
  -4  -3   1 1942.11  131.89 
  -4  -3   1 1800.72  131.79 
  -4  -3   1 1824.12  141.79 
  -4  -3   1 1932.11  141.29 
  -4  -3   1 1848.92  143.29 
  -4  -3   1 1982.60  146.29 
   3  -4   1 2000.40  128.59 
   3  -4   1 2005.70  121.59 
  -4  -3   1 2063.79  159.68 
  -4  -3   1 2025.90  143.09 
  -4  -3   1 1813.72  144.19 
   4   3   1 1828.82  134.59 
   3  -4   1 1908.01  125.69 
   3  -4   1 1856.31  132.99 
   3  -4   1 2101.59  136.09 
   4   3   1 2095.49  153.48 
  -4  -3   1 2033.20  137.99 
   3  -4   1 1792.22  139.09 
  -3   4   1 1916.01  135.89 
   4   3   1 2072.69  143.49 
  -3   4   1 1930.11  134.99 
   3  -4   1 2006.70  128.59 
   4   3   1 1723.53  138.29 
  -4  -3   1 1908.01  156.68 
   4   3   1 1880.01  131.39 
   4   3   1 1963.10  132.19 
   3  -4   1 1857.21  135.29 
   3  -4   1 2042.50  128.69 
   4   3   1 1779.72  129.99 
  -3   4   1 1926.81  144.59 
  -3   4   1 2040.70  123.69 
   4   3   1 2048.59  150.78 
   4   3   1 1851.71  135.59 
   4   3   1 2029.10  139.49 
   2  -4  -1 1200.18   99.09 
   4   2  -1 1183.98   86.09 
   2  -4  -1 1152.48   81.99 
  -2   4  -1 1142.99   81.39 
   4   2  -1  914.41   85.49 
  -2   4  -1 1207.58   74.99 
   2  -4  -1 1143.59   85.99 
   4   2  -1 1057.29   91.69 
   2  -4  -1 1162.08   83.29 
  -2   4  -1 1274.17   83.89 
  -2   4  -1 1206.68   86.79 
  -4  -2  -1 1219.28   88.69 
  -4  -2  -1 1312.77   89.19 
   2  -4  -1 1101.99   90.19 
   2  -4  -1 1161.18   84.89 
  -2   4  -1 1248.18   85.09 
  -2   4  -1 1161.78   88.69 
  -4  -2  -1 1099.39   84.19 
  -4  -2  -1 1084.09   94.79 
  -2   4  -1 1097.89   89.19 
  -4  -2  -1 1163.28   88.59 
  -2   4  -1 1104.59  116.59 
  -2   4  -1 1236.38   91.89 
  -2   4  -1 1129.69   75.29 
   2  -4  -1 1057.09   85.09 
  -4  -2  -1 1034.00   92.49 
   4   2  -1 1055.69   89.99 
  -4  -2  -1 1131.89   77.69 
   2  -4  -1 1123.39   71.29 
   2  -4  -1 1214.48   77.89 
   2  -4  -1 1154.38   86.09 
   2  -4  -1 1013.60   82.49 
   2  -4  -1 1195.48   87.19 
  -4  -2  -1 1139.09   89.29 
   2  -4  -1 1162.88   83.99 
  -2   4  -1 1104.19   77.29 
  -4  -2  -1 1133.99   85.59 
  -4  -2  -1 1116.99  102.49 
  -4  -2  -1 1098.79   99.99 
   2  -4  -1 1191.78   94.59 
  -4  -2  -1 1147.89   96.79 
  -4  -2  -1 1175.98   77.89 
  -2   4  -1 1132.69   94.99 
  -4  -2  -1 1113.99   85.19 
   2  -4  -1 1099.89   83.19 
   4   2  -1 1128.09   88.49 
   4   2  -1 1275.77   93.49 
   2  -4  -1 1112.19   82.89 
   2  -4  -1 1188.08   70.79 
   4   2  -1 1152.08  105.89 
  -4  -2  -1 1120.39   87.79 
  -2   4  -1 1189.78   82.19 
  -2   4  -1 1110.09   99.09 
   4   2  -1 1045.70   83.59 
  -4  -2  -1 1143.59   78.49 
   4   2  -1  978.90  109.39 
  -4  -2  -1 1183.68   83.29 
   4   2  -1 1084.99   90.69 
   4   2  -1  900.91   83.59 
   4   2  -1 1122.69  101.39 
  -2   4  -1 1214.48   84.09 
  -4  -2  -1 1200.78   94.39 
   2  -4  -1 1155.68   71.49 
  -4  -2  -1 1050.19   94.19 
   4   2  -1 1092.99   87.59 
   4   2  -1 1213.88   94.39 
   4   2  -1 1062.09   86.29 
   4   2  -1 1176.18   85.69 
   4   2  -1 1150.58   90.79 
   2  -4  -1 1031.50   83.39 
   2  -4  -1 1271.57   74.99 
   2  -4  -1 1115.99   71.19 
  -4  -2  -1 1116.09   97.49 
   2  -4  -1 1148.99   91.99 
   4   2  -1 1097.49   92.19 
   2  -4  -1 1121.89   81.19 
  -2   4  -1 1135.09   75.49 
  -4  -2  -1  961.00   94.69 
   2  -4  -1 1174.18   79.19 
   4   2  -1 1132.89   80.89 
   4   2  -1 1185.58   86.09 
  -2   4  -1 1163.68   85.89 
   2  -4  -1 1069.79   90.79 
  -4  -2  -1 1205.08   86.09 
   4   2   1 1115.29   89.09 
   2  -4   1 1000.50   92.39 
   2  -4   1 1052.99   82.29 
   4   2   1 1058.39   84.49 
   4   2   1 1016.10   78.39 
   4   2   1 1115.39   93.39 
   2  -4   1 1109.39   88.59 
   4   2   1 1052.09   90.89 
  -4  -2   1 1116.59   94.89 
   4   2   1 1158.28   84.09 
  -2   4   1 1127.09   77.89 
   4   2   1 1049.59   90.89 
   4   2   1 1110.69   88.69 
   2  -4   1 1136.39   80.09 
  -4  -2   1  995.60   91.09 
  -4  -2   1 1030.50   93.29 
  -2   4   1 1091.19   82.49 
  -4  -2   1 1098.99  101.69 
  -4  -2   1 1095.69   87.69 
   4   2   1 1276.87   98.99 
   2  -4   1 1093.99   85.79 
   2  -4   1 1175.18   79.19 
   2  -4   1 1138.99   82.79 
   4   2   1 1253.87   88.39 
  -4  -2   1 1242.98   91.89 
   4   2   1 1166.28  100.89 
  -2   4   1 1066.69   72.39 
   2  -4   1 1050.59   85.79 
   4   2   1 1176.68   89.59 
   4   2   1 1157.58   96.39 
  -2   4   1 1190.38   87.29 
  -2   4   1 1162.08   72.49 
  -2   4   1 1050.49   86.59 
  -4  -2   1 1234.68   91.39 
  -4  -2   1 1219.08   88.69 
   2  -4   1 1131.49   85.59 
   4   2   1 1179.58   89.39 
   2  -4   1 1109.79   89.19 
  -2   4   1 1187.88   86.49 
   4   2   1 1225.78   98.59 
   2  -4   1 1010.80   89.39 
   2  -4   1 1067.19   97.09 
  -2   4   1 1165.78   91.49 
   4   2   1 1249.18   87.29 
   2  -4   1 1249.07   83.29 
  -2   4   1 1104.19   74.79 
  -4  -2   1 1176.48   90.29 
  -4  -2   1 1226.08   94.39 
  -4  -2   1 1116.19  101.69 
  -2   4   1 1090.79   81.89 
  -4  -2   1 1151.58   93.39 
  -4  -2   1 1029.80   90.09 
  -2   4   1 1075.69   71.89 
   4   2   1 1131.89   85.49 
   2  -4   1 1131.79   76.49 
  -4  -2   1 1200.58   80.49 
  -2   4   1 1122.09   96.79 
   2  -4   1 1172.08   85.69 
   4   2   1 1022.90   82.19 
   2  -4   1 1140.19   87.59 
  -2   4   1 1118.69   73.29 
  -2   4   1 1161.28   86.99 
  -4  -2   1 1191.38   99.39 
  -2   4   1 1113.29   72.49 
   2  -4   1 1095.19   79.09 
  -4  -2   1 1131.49   80.89 
  -4  -2   1 1090.19   78.49 
  -4  -2   1 1060.39   82.99 
   2  -4   1 1193.98   82.09 
   2  -4   1 1162.38  101.89 
   2  -4   1 1128.99   85.79 
   2  -4   1 1054.59   85.99 
   2  -4   1 1157.78   93.39 
  -4  -2   1 1188.18   89.39 
   2  -4   1 1189.88   81.69 
   4   2   1 1194.38  101.09 
  -2   4   1 1246.18   88.89 
   2  -4   1 1118.49   86.49 
   4   2   1 1160.68   78.59 
  -4  -2   1 1183.58   95.89 
   4   1  -1  183.68   29.10 
   1  -4  -1  191.98   31.40 
  -4  -1  -1  232.98   42.70 
   1  -4  -1  241.18   24.30 
   1  -4  -1  211.08   22.50 
  -1   4  -1  230.88   30.00 
   1  -4  -1  217.98   35.10 
   1  -4  -1  192.68   30.20 
  -1   4  -1  210.68   29.80 
  -1   4  -1  300.07   48.60 
  -1   4  -1  204.18   29.20 
  -4  -1  -1  158.38   24.40 
   1  -4  -1  212.38   36.10 
  -1   4  -1  202.88   34.50 
  -4  -1  -1  294.17   43.00 
  -4  -1  -1  221.98   33.50 
   4   1  -1  254.07   34.90 
   4   1  -1  192.88   37.10 
  -4  -1  -1  232.78   31.10 
   1  -4  -1  181.28   31.40 
  -1   4  -1  229.68   29.80 
   4   1  -1  169.58   31.40 
  -1   4  -1  220.48   38.10 
   4   1  -1  192.38   33.10 
   4   1  -1  198.08   42.30 
   1  -4  -1  187.58   21.50 
  -4  -1  -1  135.29   32.10 
  -4  -1  -1  180.18   30.10 
   1  -4  -1  240.08   29.90 
  -1   4  -1  217.18   30.60 
  -4  -1  -1  146.69   34.50 
   1  -4  -1  165.88   20.60 
  -1   4  -1  205.48   29.40 
   1  -4  -1  201.58   30.70 
   4   1  -1  183.78   42.40 
   4   1  -1  211.58   33.80 
   1  -4  -1  273.97   26.50 
   4   1  -1  219.18   36.10 
   4   1  -1  235.68   43.70 
   4   1  -1  241.18   35.80 
   4   1  -1  209.08   33.30 
   4   1  -1  214.08   41.00 
   4   1  -1  220.18   32.70 
  -4  -1  -1  189.58   35.60 
   1  -4  -1  218.68   29.10 
  -4  -1  -1  119.89   31.30 
  -4  -1  -1  231.68   42.30 
   4   1  -1  239.68   36.90 
   4   1  -1  133.19   30.30 
  -1   4  -1  202.18   30.40 
  -1   4  -1  213.48   20.10 
  -4  -1  -1  198.98   33.30 
  -4  -1  -1  178.28   36.70 
   1  -4  -1  255.97   25.50 
  -1   4  -1  229.98   31.60 
  -4  -1  -1  203.28   28.60 
  -4  -1  -1  226.08   38.20 
   1  -4  -1  209.38   36.90 
  -1   4  -1  157.98   36.10 
  -4  -1  -1  206.98   28.90 
  -1   4  -1  225.48   29.40 
  -4  -1  -1  262.07   37.20 
   1  -4  -1  268.67   30.90 
  -1   4  -1  170.08   29.20 
   4   1  -1  233.48   36.00 
   1  -4  -1  203.38   29.50 
  -4  -1  -1  247.08   29.10 
  -4  -1  -1  242.98   46.30 
   1  -4  -1  229.68   36.50 
   1  -4  -1  179.48   34.60 
  -4  -1  -1  171.28   25.10 
  -4  -1  -1  172.88   29.70 
   4   1  -1  195.08   31.60 
  -4  -1  -1  263.27   32.10 
   1  -4  -1  202.48   30.60 
   1  -4  -1  196.28   35.40 
   1  -4  -1  296.77   37.70 
  -4  -1  -1  245.48   32.80 
   4   1  -1  116.19   26.50 
   1  -4  -1  193.68   26.40 
   1  -4  -1  236.08   26.70 
   4   1  -1  180.28   32.90 
   1  -4  -1  171.18   27.90 
  -1   4  -1  172.18   27.90 
   1  -4  -1  222.88   24.20 
   4   1  -1  238.28   35.80 
  -1   4  -1  187.38   33.20 
   4   1  -1  195.98   23.60 
  -1   4  -1  205.78   29.80 
  -4  -1   1  215.08   29.50 
   4   1   1  127.39   33.20 
  -4  -1   1  235.68   32.70 
  -1   4   1  231.58   28.00 
   1  -4   1  221.98   33.40 
  -1   4   1  164.98   21.90 
   4   1   1  245.28   26.00 
  -4  -1   1  233.38   42.00 
   1  -4   1  179.98   29.50 
  -1   4   1  208.48   31.50 
   1  -4   1  221.68   22.40 
  -4  -1   1  209.28   42.20 
   1  -4   1  207.98   29.60 
  -4  -1   1  176.98   33.90 
  -1   4   1  197.78   26.10 
   1  -4   1  227.98   33.10 
  -4  -1   1  158.48   35.20 
  -4  -1   1  276.67   38.10 
   1  -4   1  166.88   28.20 
  -4  -1   1  215.58   23.10 
   4   1   1  225.18   32.10 
   1  -4   1  205.78   30.40 
   4   1   1  285.47   35.00 
   1  -4   1  215.18   33.70 
   4   1   1  194.28   37.70 
  -1   4   1  210.28   33.80 
  -1   4   1  191.28   24.10 
  -4  -1   1  185.08   32.10 
   1  -4   1  201.38   37.70 
   4   1   1  244.48   40.90 
   4   1   1  187.08   35.80 
  -1   4   1  200.18   23.30 
   4   1   1  204.98   31.20 
   4   1   1  232.08   28.20 
  -4  -1   1  167.48   30.80 
   4   1   1  275.47   37.70 
  -1   4   1  199.98   40.40 
   1  -4   1  174.48   34.00 
   1  -4   1  233.68   33.00 
   4   1   1  247.48   34.50 
   4   1   1  233.08   42.80 
  -4  -1   1  209.28   39.60 
   1  -4   1  184.88   29.50 
  -4  -1   1  245.58   33.10 
   1  -4   1  223.68   35.70 
   4   1   1  270.27   30.90 
   4   1   1  210.28   31.90 
  -1   4   1  201.38   26.10 
   4   1   1  179.28   35.70 
  -4  -1   1  235.18   28.20 
  -1   4   1  213.88   28.30 
   1  -4   1  265.07   33.70 
   1  -4   1  198.18   35.90 
   4   1   1  232.08   32.10 
  -4  -1   1  237.78   41.80 
  -4  -1   1  209.38   27.40 
   1  -4   1  175.48   34.80 
  -4  -1   1  261.77   40.50 
  -4  -1   1  185.08   32.60 
  -1   4   1  207.48   25.60 
   1  -4   1  201.78   33.70 
   1  -4   1  247.18   31.00 
  -1   4   1  200.88   22.60 
  -4  -1   1  218.38   37.10 
   1  -4   1  182.88   29.20 
   4   1   1  245.98   43.40 
  -4  -1   1  222.28   32.80 
   1  -4   1  165.68   35.00 
  -1   4   1  241.08   35.40 
  -1   4   1  239.28   24.60 
  -1   4   1  210.78   33.60 
   1  -4   1  199.48   27.40 
   1  -4   1  206.28   27.50 
  -4  -1   1  245.58   38.70 
   1  -4   1  233.08   32.20 
  -4  -1   1  206.08   30.10 
   1  -4   1  234.58   29.80 
  -1   4   1  238.58   33.20 
   4   1   1  206.28   30.70 
   1  -4   1  196.88   36.70 
   4   1   1  197.48   28.70 
  -4   0  -1   17.10   10.00 
   0  -4  -1   25.50   17.20 
   4   0  -1   -3.80   12.40 
  -4   0  -1    3.10   11.50 
   4   0  -1  -10.00    9.40 
   4   0  -1    9.10   14.00 
   4   0  -1    2.20   12.50 
   0  -4  -1   17.70   11.80 
   0   4  -1    5.20   10.60 
   0   4  -1    7.70   12.60 
   0  -4  -1    5.80   10.90 
   4   0  -1   22.60   16.50 
  -4   0  -1   -5.20   15.10 
   0  -4  -1   20.10   12.70 
  -4   0  -1   35.80   12.00 
  -4   0  -1   21.10   14.30 
   0  -4  -1   25.00   10.50 
   4   0  -1   -3.00    8.30 
  -4   0  -1   -4.60   12.70 
  -4   0  -1  -10.20   11.80 
   0   4  -1   13.40   13.70 
  -4   0  -1   33.70   11.00 
  -4   0  -1   11.50   12.80 
   0   4  -1   18.10   13.20 
   0  -4  -1    1.60   10.10 
   0   4  -1   21.60   11.00 
   0   4  -1   15.10    6.80 
   4   0  -1   11.20   11.80 
   4   0  -1   13.90   14.40 
   0   4  -1    1.00    7.90 
   4   0  -1   49.30   24.30 
   4   0  -1   20.20   10.90 
   4   0  -1   -6.90    6.40 
   4   0  -1    3.20    4.50 
   0  -4  -1   -2.30    6.30 
   0  -4  -1   -5.30   10.00 
  -4   0  -1   11.30   10.70 
   0  -4  -1   19.30    9.10 
   0  -4  -1   16.70    7.40 
   4   0  -1    4.80    8.80 
  -4   0  -1    8.40   13.90 
   0   4  -1    5.20   10.80 
  -4   0  -1   12.40    9.70 
   0   4  -1   21.10   12.60 
   0   4  -1   12.30   12.10 
   0  -4  -1    5.30    7.70 
   4   0  -1   12.10   11.80 
   0   4  -1   19.50    6.60 
   0  -4  -1   16.10    8.90 
   0   4  -1   23.30   13.50 
   0  -4  -1   18.10   13.60 
   0  -4  -1    3.50    9.40 
   4   0  -1   15.10   12.10 
   4   0  -1   25.00   10.50 
   4   0  -1   45.10   16.60 
   0  -4  -1   21.10    8.10 
  -4   0  -1    5.40   10.80 
   0  -4  -1   16.30    6.10 
   0  -4  -1   23.60   14.50 
   0   4  -1   13.30    9.40 
   4   0  -1   21.00   10.80 
   0   4  -1   21.30   14.50 
  -4   0  -1    7.80    8.30 
   0   4  -1   11.10    9.90 
   0  -4  -1   24.00   12.00 
   4   0  -1   -6.50    9.80 
   0   4  -1    0.20    9.80 
   0  -4  -1   24.70   13.70 
  -4   0  -1   11.50    7.80 
   4   0  -1   17.90   11.10 
   0  -4  -1    7.10    9.70 
  -4   0  -1    2.20    8.10 
  -4   0  -1    5.20   11.30 
   0  -4  -1   15.60    8.10 
   0   4  -1   14.30    9.30 
   4   0  -1    7.10   11.70 
   4   0  -1   -7.60    6.90 
  -4   0  -1   11.00   10.90 
   0  -4  -1   15.30    8.40 
   0  -4  -1   -1.20    8.70 
  -4   0  -1   -1.20   11.90 
   0   4  -1   -1.30   11.00 
   0   4  -1   24.80   16.20 
   0  -4  -1   13.90    8.40 
   4   0  -1    3.20   10.50 
   0   4  -1   21.10   10.90 
   4   0  -1   13.10    5.30 
  -4   0  -1   19.20   15.60 
   0  -4   1   -6.10    9.60 
   4   0   1   11.70   17.70 
   0  -4   1   15.60   11.90 
   0  -4   1   29.60   14.90 
   0  -4   1   15.90   11.00 
   4   0   1   18.30    9.90 
   0   4   1   20.40   10.50 
   0  -4   1   -1.80   10.10 
   0  -4   1    5.10    8.40 
  -4   0   1   17.50   12.20 
   4   0   1   23.20   10.70 
   4   0   1    5.00    8.30 
  -4   0   1   19.10   15.80 
   0   4   1    3.30    6.00 
  -4   0   1    6.20   10.60 
   0   4   1   23.60    9.80 
   0  -4   1   21.60   12.30 
   0   4   1    7.00    6.10 
   4   0   1    3.40    7.40 
   4   0   1   -8.20   12.30 
   4   0   1   11.80    9.90 
   4   0   1   21.40   11.40 
   4   0   1    8.80    8.00 
  -4   0   1   22.00   11.80 
   0   4   1    7.80    7.10 
   0   4   1   17.10    8.20 
   4   0   1    6.20    8.30 
  -4   0   1   23.20   10.10 
   0   4   1   40.40   12.30 
   0  -4   1   30.90   15.80 
   0  -4   1   19.60   13.60 
   0   4   1    2.00    8.20 
   0  -4   1   -0.30    9.40 
   4   0   1    0.30    7.40 
  -4   0   1   -1.10    8.80 
  -4   0   1    9.30    9.80 
   0  -4   1   24.50   12.10 
   0   4   1   13.30   13.30 
  -4   0   1   16.20   10.30 
   0   4   1    3.60   11.80 
   0  -4   1   -3.70   11.20 
   0  -4   1   16.40   14.00 
   4   0   1    2.60   12.50 
  -4   0   1    4.00   11.20 
   0   4   1   12.00    7.10 
   0  -4   1    5.30   10.80 
   4   0   1   12.20   11.00 
  -4   0   1    8.70    8.60 
   0  -4   1   12.20    9.90 
  -4   0   1   14.60   11.70 
  -4   0   1   32.50   17.30 
   0  -4   1    0.60   11.00 
  -4   0   1   41.60   13.80 
   4   0   1    0.10    9.10 
   0   4   1   28.50   10.50 
  -4   0   1    8.50   10.00 
   4   0   1    5.10    9.10 
   0   4   1    5.10    9.10 
   4   0   1   26.60   14.80 
   0   4   1   16.30   11.00 
  -4   0   1    9.50    8.30 
   4   0   1    5.70    9.10 
   0  -4   1    9.40   11.60 
   0  -4   1    0.50    7.60 
   0  -4   1    8.90   11.10 
   0  -4   1   33.30   17.00 
   4   0   1   17.20    8.50 
  -4   0   1   -2.30    8.80 
  -4   0   1    9.90   14.80 
   0   4   1    3.70    9.00 
   0  -4   1   10.90   11.80 
   0  -4   1    7.10    9.40 
   0  -4   1   11.80   12.10 
  -4   0   1   19.20   14.60 
   4   0   1    7.20   13.90 
   4   0   1    6.90   12.80 
   0  -4   1   -7.70    6.70 
   4   0   1    7.70   11.10 
   0  -4   1   23.20   11.30 
  -1  -4  -1  218.78   30.00 
  -4   1  -1  163.68   37.00 
   1   4  -1  231.68   39.60 
  -1  -4  -1  236.38   35.40 
  -1  -4  -1  172.78   26.70 
  -1  -4  -1  145.99   33.50 
   1   4  -1  239.98   28.20 
   1   4  -1  204.98   36.90 
   4  -1  -1  176.48   28.70 
  -1  -4  -1  216.58   27.90 
   4  -1  -1  199.38   32.50 
  -4   1  -1  194.98   29.00 
  -1  -4  -1  178.08   35.50 
  -4   1  -1  215.08   27.00 
  -4   1  -1  233.08   34.00 
  -4   1  -1  163.88   29.30 
  -4   1  -1  241.68   42.40 
  -1  -4  -1  183.98   33.20 
  -1  -4  -1  236.38   19.30 
   1   4  -1  228.78   33.00 
  -4   1  -1  231.58   34.20 
  -1  -4  -1  179.38   30.20 
  -1  -4  -1  237.98   38.60 
   4  -1  -1  197.48   27.40 
   4  -1  -1  230.38   33.30 
  -1  -4  -1  164.78   28.70 
  -4   1  -1  235.38   26.30 
   4  -1  -1  263.37   35.20 
  -1  -4  -1  191.58   33.20 
   1   4  -1  211.58   36.20 
   4  -1  -1  234.08   30.40 
   1   4  -1  255.37   39.00 
   4  -1  -1  165.58   31.10 
   1   4  -1  202.18   33.50 
   1   4  -1  215.08   37.80 
  -1  -4  -1  218.98   18.30 
  -4   1  -1  156.88   24.60 
  -1  -4  -1  170.08   26.50 
   4  -1  -1  220.98   33.60 
   1   4  -1  188.08   31.50 
   1   4  -1  189.08   24.90 
  -4   1  -1  235.98   39.70 
  -1  -4  -1  228.68   37.90 
  -4   1  -1  239.48   42.30 
  -1  -4  -1  209.68   34.00 
   4  -1  -1  124.79   29.80 
   4  -1  -1  176.78   30.30 
   4  -1  -1  226.78   36.00 
   4  -1  -1  197.58   30.20 
   4  -1  -1  155.48   23.30 
   4  -1  -1  186.78   31.10 
  -1  -4  -1  211.68   17.80 
  -4   1  -1  221.28   31.40 
   4  -1  -1  155.38   32.00 
   4  -1  -1  193.58   31.90 
   4  -1  -1  208.48   27.00 
   1   4  -1  295.27   41.30 
  -4   1  -1  199.78   34.10 
   4  -1  -1  241.08   47.60 
  -4   1  -1  194.38   28.80 
   4  -1  -1  184.78   25.10 
   4  -1  -1  255.67   41.70 
   4  -1  -1  190.98   34.20 
   4  -1  -1  271.07   33.50 
  -1  -4  -1  211.68   34.50 
  -4   1  -1  177.98   24.20 
  -4   1  -1  246.68   32.50 
   1   4  -1  211.88   32.80 
  -1  -4  -1  155.28   28.00 
  -1  -4  -1  213.48   17.90 
   1   4  -1  212.98   37.30 
   4  -1  -1  164.18   25.80 
   1   4  -1  174.58   36.20 
   4  -1  -1  194.28   27.60 
   1   4  -1  247.48   34.70 
   1   4  -1  209.18   36.30 
  -4   1  -1  253.17   33.90 
  -1  -4  -1  217.88   33.00 
   1   4  -1  212.58   34.20 
   1   4  -1  161.28   24.70 
  -1  -4  -1  208.88   35.50 
   4  -1  -1  234.48   37.00 
  -1  -4  -1  179.98   29.00 
  -4   1  -1  256.97   34.30 
   1   4  -1  198.28   26.20 
  -1  -4  -1  230.08   18.50 
  -4   1  -1  210.48   34.60 
  -1  -4  -1  190.38   32.80 
  -4   1   1  240.18   32.70 
   1   4   1  199.48   31.10 
  -1  -4   1  213.88   37.00 
   4  -1   1  241.98   32.10 
  -4   1   1  200.18   33.50 
   1   4   1  228.58   30.00 
  -1  -4   1  190.58   33.60 
   1   4   1  192.78   19.60 
   4  -1   1  250.57   34.10 
  -1  -4   1  144.19   31.80 
  -1  -4   1  232.68   35.50 
   4  -1   1  225.28   32.30 
  -1  -4   1  231.78   31.70 
  -1  -4   1  263.47   39.10 
   4  -1   1  205.88   30.50 
   1   4   1  197.08   18.30 
   4  -1   1  158.08   28.50 
  -4   1   1  218.48   35.20 
  -1  -4   1  331.07   48.20 
   4  -1   1  236.68   31.60 
   1   4   1  268.17   28.40 
   4  -1   1  153.88   27.30 
  -4   1   1  262.97   42.80 
  -1  -4   1  213.08   32.90 
  -1  -4   1  238.08   37.80 
  -1  -4   1  265.97   41.80 
  -1  -4   1  164.48   26.40 
   4  -1   1  194.68   27.10 
   1   4   1  216.68   18.40 
   1   4   1  168.98   36.60 
   4  -1   1  253.47   46.60 
   4  -1   1  180.98   28.20 
   4  -1   1  152.88   39.60 
   1   4   1  198.58   31.40 
  -1  -4   1  186.58   30.80 
   4  -1   1  183.48   24.10 
   1   4   1  240.48   35.90 
  -4   1   1  193.08   32.20 
  -4   1   1  198.68   33.80 
   4  -1   1  197.68   32.40 
  -1  -4   1  155.48   31.60 
   1   4   1  190.48   27.60 
  -1  -4   1  248.18   35.70 
  -4   1   1  216.08   31.80 
   1   4   1  237.98   21.00 
  -1  -4   1  214.98   29.20 
  -4   1   1  204.38   25.60 
  -4   1   1  242.28   37.80 
  -1  -4   1  177.18   24.30 
  -1  -4   1  268.87   33.90 
   4  -1   1  224.28   46.10 
   1   4   1  272.47   34.70 
  -1  -4   1  237.28   37.10 
   4  -1   1  208.88   44.60 
  -1  -4   1  196.18   29.00 
  -1  -4   1  211.98   32.20 
  -1  -4   1  208.38   33.40 
   1   4   1  235.48   18.60 
   1   4   1  222.98   33.60 
   1   4   1  175.68   33.40 
  -1  -4   1  186.78   35.80 
   1   4   1  199.38   17.80 
  -1  -4   1  224.18   34.80 
  -4   1   1  187.68   32.00 
   4  -1   1  217.38   37.60 
  -4   1   1  264.77   35.80 
   1   4   1  207.28   30.40 
   4  -1   1  216.88   31.10 
  -1  -4   1  226.08   35.10 
  -4   1   1  164.98   21.90 
   4  -1   1  183.58   24.30 
   4  -1   1  209.78   32.30 
  -4   1   1  267.67   28.70 
  -4   1   1  181.08   22.80 
   4  -1   1  185.78   23.50 
   4  -1   1  155.78   26.60 
   1   4   1  198.28   34.00 
   1   4   1  182.68   27.00 
  -4   1   1  197.48   24.30 
  -4   1   1  214.28   35.00 
   4  -1   1  182.88   25.00 
   4  -2  -1 1173.68   81.69 
   4  -2  -1 1187.48   76.69 
   2   4  -1 1138.09   87.39 
   4  -2  -1 1209.38   89.59 
  -2  -4  -1 1211.68   88.99 
   4  -2  -1 1168.18   77.79 
  -4   2  -1 1143.79   83.29 
  -2  -4  -1 1120.09   87.39 
  -4   2  -1 1110.99   98.19 
   4  -2  -1 1110.59   86.59 
  -4   2  -1 1176.08   75.69 
  -4   2  -1  982.30   83.79 
  -2  -4  -1 1074.69   76.79 
  -4   2  -1 1110.29   87.69 
  -2  -4  -1 1110.89   86.29 
  -2  -4  -1 1122.59   76.99 
   2   4  -1 1225.08   93.79 
   2   4  -1 1124.09   90.19 
   2   4  -1 1102.29   92.49 
  -2  -4  -1 1118.29   83.99 
   4  -2  -1 1114.49   71.79 
   2   4  -1 1059.79   90.79 
   2   4  -1 1173.08   82.09 
   2   4  -1 1279.87  102.09 
  -2  -4  -1 1072.59   85.19 
   2   4  -1 1053.49   88.59 
  -2  -4  -1 1046.10   89.99 
   2   4  -1 1016.30   96.19 
   2   4  -1 1133.99   83.19 
  -2  -4  -1  848.82   81.99 
   2   4  -1 1210.68   89.59 
  -2  -4  -1 1205.18   95.89 
  -4   2  -1 1284.07   84.29 
   4  -2  -1 1126.59   89.89 
  -2  -4  -1 1152.08   89.89 
  -4   2  -1 1048.00   84.99 
   4  -2  -1 1129.69   96.09 
  -4   2  -1 1190.98   74.99 
  -4   2  -1 1001.80   95.99 
  -2  -4  -1 1221.78   98.89 
   2   4  -1  962.80   92.09 
   4  -2  -1 1035.80   92.09 
  -2  -4  -1 1122.09   87.29 
   4  -2  -1 1129.59   86.09 
   4  -2  -1 1132.29   83.69 
   4  -2  -1 1126.59   84.89 
  -2  -4  -1 1228.08   92.89 
   2   4  -1 1106.39   92.49 
   4  -2  -1 1065.89   88.79 
   2   4  -1 1140.19   87.99 
   2   4  -1 1049.09   96.09 
  -2  -4  -1 1201.58   93.29 
  -4   2  -1 1065.19   85.79 
   4  -2  -1 1196.48   84.29 
   4  -2  -1 1083.99   86.59 
  -4   2  -1 1125.59   84.29 
  -2  -4  -1 1033.80   84.59 
   2   4  -1 1076.59   87.59 
  -4   2  -1 1117.49   82.09 
   2   4  -1 1300.27   92.39 
  -2  -4  -1 1137.89   91.19 
   2   4  -1 1104.19   79.19 
   4  -2  -1 1194.68   88.59 
   2   4  -1 1054.79   87.59 
  -2  -4  -1 1172.48   83.49 
   4  -2  -1 1140.69   77.69 
  -4   2  -1 1243.88   99.49 
   4  -2  -1 1231.18  102.89 
   4  -2  -1 1097.49   85.79 
  -4   2  -1 1126.79   82.09 
   4  -2  -1 1124.59   86.19 
  -4   2  -1 1138.79   81.69 
   4  -2  -1 1210.88   75.79 
   4  -2  -1 1148.99   73.59 
   4  -2  -1 1025.40   86.59 
  -2  -4  -1 1043.30   88.09 
  -2  -4  -1 1155.28   90.29 
   4  -2  -1 1147.29   83.89 
   4  -2  -1 1147.79   77.09 
  -2  -4  -1 1030.00   87.39 
  -2  -4  -1 1088.09   90.49 
   2   4   1 1149.48   87.69 
  -4   2   1 1175.28   95.79 
  -2  -4   1 1109.59   94.09 
   4  -2   1 1173.88   76.69 
  -2  -4   1 1099.19   86.29 
  -4   2   1 1138.79   85.89 
  -4   2   1 1114.89   73.49 
   2   4   1 1193.58   86.89 
  -4   2   1 1143.29   72.59 
   4  -2   1 1155.68  100.29 
  -2  -4   1 1262.77   91.39 
   4  -2   1 1105.99   75.39 
   4  -2   1 1074.19   84.99 
  -2  -4   1 1033.30   82.39 
  -2  -4   1 1090.29   90.19 
   4  -2   1 1195.08  105.59 
   4  -2   1 1079.99   85.99 
   4  -2   1 1127.69   80.49 
  -4   2   1 1159.48   93.99 
  -4   2   1 1073.99   84.79 
  -4   2   1 1084.19   88.49 
  -4   2   1 1124.79   72.79 
   2   4   1 1070.59   91.69 
   4  -2   1 1069.09  100.29 
   4  -2   1 1130.19   84.89 
  -2  -4   1 1202.38   97.89 
   2   4   1  995.70   84.09 
   2   4   1 1112.79   77.99 
  -2  -4   1 1218.68   95.49 
   2   4   1 1188.18   89.69 
  -2  -4   1 1159.18   91.79 
   2   4   1 1193.08   95.29 
  -4   2   1 1128.79   72.69 
   4  -2   1 1074.69   85.79 
   2   4   1 1102.79   93.59 
   4  -2   1 1021.40   83.99 
   4  -2   1 1105.99   82.59 
   4  -2   1 1241.48   81.99 
  -2  -4   1 1210.78   82.59 
  -2  -4   1 1341.17  101.19 
  -2  -4   1 1157.08   91.39 
  -4   2   1 1201.78   87.59 
  -2  -4   1 1176.38   94.69 
  -4   2   1 1097.49   72.79 
  -4   2   1 1109.59   85.29 
  -4   2   1 1105.09   82.39 
  -4   2   1 1083.39   85.99 
  -2  -4   1 1250.77   99.09 
  -2  -4   1 1086.39   88.09 
   4  -2   1 1031.50   86.29 
   4  -2   1 1167.08   83.59 
   2   4   1 1071.79   87.99 
  -2  -4   1 1182.28   90.59 
  -2  -4   1 1175.08   91.59 
  -2  -4   1 1166.58   94.99 
   2   4   1 1166.38   85.89 
   4  -2   1 1222.68   89.69 
   2   4   1 1324.77   77.89 
   2   4   1 1141.19   88.09 
   2   4   1 1159.38   94.59 
  -4   2   1 1103.69   80.29 
  -2  -4   1 1035.70   83.09 
   4  -2   1 1158.18   88.09 
   4  -2   1 1179.28   91.59 
  -2  -4   1 1168.18   81.69 
  -2  -4   1 1159.88   80.79 
   4  -2   1 1056.99   75.69 
   4  -2   1 1183.48   78.59 
  -2  -4   1 1144.29   91.59 
   2   4   1 1104.09   83.89 
  -2  -4   1 1253.77   81.79 
  -4   2   1 1146.69   79.39 
   4  -2   1 1092.89  101.29 
  -4   2   1 1069.09   92.59 
  -4   2   1 1140.29   85.09 
   4  -2   1 1052.49   82.09 
   2   4   1 1150.28   85.59 
   4  -3  -1 1952.20  135.69 
   4  -3  -1 1912.41  134.19 
   4  -3  -1 1818.12  123.59 
  -4   3  -1 1916.01  130.49 
  -4   3  -1 1862.41  133.19 
  -4   3  -1 1908.41  147.69 
  -4   3  -1 1980.20  137.29 
  -4   3  -1 1862.21  137.39 
   3   4  -1 1971.80  146.59 
   3   4  -1 1746.03  141.09 
   3   4  -1 1847.92  138.09 
  -3  -4  -1 1904.81  132.19 
  -4   3  -1 1946.31  120.79 
  -3  -4  -1 1779.52  142.99 
   3   4  -1 1945.81  152.78 
  -4   3  -1 1947.11  130.99 
  -3  -4  -1 1990.80  140.49 
   4  -3  -1 1853.01  130.79 
  -3  -4  -1 1774.92  147.79 
  -4   3  -1 1790.52  151.88 
  -4   3  -1 1890.11  132.69 
   4  -3  -1 2031.00  137.79 
  -4   3  -1 2003.40  134.89 
   4  -3  -1 1996.30  149.29 
   3   4  -1 2185.28  145.89 
   4  -3  -1 1838.32  142.59 
   4  -3  -1 1697.03  134.79 
   4  -3  -1 1901.51  151.08 
   3   4  -1 1954.00  142.99 
   3   4  -1 1907.31  142.39 
  -3  -4  -1 2105.49  140.29 
   3   4  -1 2084.79  136.79 
   4  -3  -1 1858.71  133.49 
   3   4  -1 1851.51  152.38 
   3   4  -1 1978.30  129.69 
   3   4  -1 1832.62  133.49 
  -3  -4  -1 1946.51  134.89 
   3   4  -1 1951.00  135.69 
  -3  -4  -1 1996.70  142.39 
   4  -3  -1 1880.11  126.29 
   3   4  -1 1924.91  140.99 
  -3  -4  -1 1865.61  145.99 
  -3  -4  -1 1998.80  143.39 
   4  -3  -1 2042.80  136.79 
  -4   3  -1 2026.10  132.29 
  -4   3  -1 1877.81  128.89 
   3   4  -1 2062.39  140.99 
  -3  -4  -1 1962.20  129.19 
   3   4  -1 1855.41  131.69 
  -3  -4  -1 1853.31  135.69 
   3   4  -1 1792.82  141.09 
   4  -3  -1 1913.81  133.29 
  -3  -4  -1 2052.29  139.59 
   3   4  -1 1830.42  136.99 
  -3  -4  -1 2087.29  141.49 
   3   4  -1 1974.50  144.69 
   4  -3  -1 1768.52  130.69 
   4  -3  -1 1846.52  125.69 
   4  -3  -1 2065.69  153.78 
  -3  -4  -1 2013.90  151.58 
  -3  -4  -1 2036.70  138.39 
   4  -3  -1 1949.60  127.09 
  -4   3  -1 1930.81  137.19 
  -4   3  -1 1829.92  152.18 
   4  -3  -1 1999.70  139.39 
  -3  -4  -1 1933.41  136.89 
  -3  -4  -1 1898.01  139.69 
  -3  -4  -1 1807.42  142.89 
  -3  -4  -1 1861.71  143.09 
   4  -3  -1 1937.51  142.09 
   4  -3  -1 2054.59  137.39 
   3   4  -1 1983.80  138.59 
  -4   3  -1 1943.41  128.79 
   3   4  -1 2059.99  155.98 
  -3  -4  -1 1994.10  137.49 
  -3  -4  -1 1960.00  129.89 
   4  -3   1 1999.70  135.79 
  -3  -4   1 1773.02  128.79 
   3   4   1 1859.91  135.59 
  -3  -4   1 1871.71  144.89 
   4  -3   1 2046.30  121.99 
   4  -3   1 2156.28  159.28 
  -3  -4   1 2089.59  142.79 
   4  -3   1 1999.40  131.19 
   3   4   1 1949.70  134.69 
  -3  -4   1 1833.12  144.69 
   4  -3   1 2012.50  133.59 
  -4   3   1 1942.21  146.59 
   3   4   1 1978.40  141.39 
   3   4   1 1900.01  149.29 
  -4   3   1 1845.42  133.69 
   3   4   1 1886.21  142.19 
   4  -3   1 2007.20  123.79 
   4  -3   1 1746.83  134.69 
  -4   3   1 1899.21  128.29 
  -3  -4   1 1880.41  152.68 
  -3  -4   1 1867.31  132.09 
  -4   3   1 1728.63  128.09 
   4  -3   1 1852.11  146.39 
   3   4   1 1898.61  137.99 
   3   4   1 1922.01  136.79 
   4  -3   1 2021.00  140.49 
  -4   3   1 1849.61  134.19 
   4  -3   1 1930.41  121.79 
   4  -3   1 1832.82  138.49 
   4  -3   1 1984.00  142.79 
  -3  -4   1 1782.42  128.09 
   4  -3   1 1973.20  135.79 
   3   4   1 1753.92  133.99 
  -4   3   1 1906.41  148.79 
   3   4   1 1825.72  127.09 
   4  -3   1 1918.01  138.19 
  -4   3   1 1918.31  136.29 
  -4   3   1 1897.31  124.69 
  -3  -4   1 1849.21  128.69 
  -3  -4   1 1735.53  140.29 
  -3  -4   1 1855.21  139.49 
   4  -3   1 2222.48  139.19 
  -3  -4   1 1981.60  140.49 
   4  -3   1 2007.20  132.39 
   3   4   1 1782.72  137.59 
  -3  -4   1 2017.60  131.29 
  -3  -4   1 2139.49  138.29 
  -3  -4   1 1987.00  140.99 
   4  -3   1 1934.41  137.69 
   4  -3   1 1913.51  123.19 
   3   4   1 1882.61  136.69 
  -3  -4   1 1850.51  136.39 
  -3  -4   1 2075.49  151.78 
   4  -3   1 2166.98  158.48 
  -3  -4   1 2054.99  132.79 
  -4   3   1 2151.48  138.09 
   4  -3   1 2140.79  132.79 
  -3  -4   1 2167.78  156.58 
  -3  -4   1 2054.59  144.59 
   3   4   1 1848.42  129.59 
  -3  -4   1 2027.70  143.49 
   4  -3   1 1815.62  145.79 
   4  -3   1 1950.60  128.89 
   3   4   1 1794.92  147.49 
   3   4   1 2110.39  141.09 
   3   4   1 1838.22  147.59 
  -3  -4   1 2112.19  151.68 
  -4   3   1 1985.80  149.69 
  -4   3   1 1866.91  134.39 
  -4   3   1 1991.50  138.99 
  -3  -4   1 2055.89  149.88 
   4  -3   1 2002.50  121.49 
   4  -3   1 1757.72  150.18 
   3   4   1 1900.41  147.39 
  -4   3   1 1901.71  135.19 
  -3  -4   1 1850.51  149.29 
   4  -3   1 2053.49  121.89 
  -3  -4   1 1803.32  144.99 
   3   4   1 1816.02  136.69 
  -4  -4  -1    3.50    5.10 
   4   4  -1   17.10   10.40 
  -4  -4  -1    4.40    6.10 
   4   4  -1   -1.90   15.40 
   4   4  -1   -1.50   13.80 
   4  -4  -1    1.00    5.20 
  -4   4  -1   14.50   20.80 
  -4   4  -1    7.00    9.40 
  -4  -4  -1   28.30   21.30 
   4  -4  -1    2.90    6.90 
   4  -4  -1    1.70   13.40 
  -4  -4  -1    6.70   13.10 
  -4  -4  -1   -3.90   12.10 
   4   4  -1   17.20   22.50 
  -4  -4  -1   15.70   15.10 
  -4  -4  -1   -9.80   15.10 
  -4  -4  -1   10.10   14.30 
  -4  -4  -1  -13.20   11.70 
   4   4  -1  -12.10    7.50 
   4   4  -1   -7.10    9.10 
   4   4  -1  -15.30   11.00 
  -4  -4  -1   17.60   15.40 
   4  -4  -1    5.50   12.40 
  -4  -4  -1    3.20    5.20 
   4  -4  -1   -0.60   11.20 
   4   4  -1    0.90   14.70 
  -4  -4  -1   -7.10   10.40 
  -4   4  -1   10.10   22.40 
  -4  -4  -1    1.50   12.20 
   4   4  -1   25.70   15.90 
  -4  -4  -1   -3.20   11.60 
  -4   4  -1   12.60   11.10 
  -4   4  -1   27.20   16.60 
  -4   4  -1   23.50   14.80 
   4  -4  -1  -17.50   12.60 
  -4  -4  -1   17.60   18.20 
   4   4  -1   15.50   23.60 
   4  -4  -1   13.90   11.80 
   4  -4  -1   -8.40   10.00 
  -4  -4  -1   -1.20    4.60 
   4  -4  -1   15.60   15.70 
  -4  -4  -1   -5.50   15.20 
  -4  -4  -1    0.70   14.20 
   4  -4  -1   -3.90    7.70 
   4   4  -1   -8.00    9.40 
   4  -4  -1   -2.70    8.90 
   4  -4  -1    3.80   10.30 
   4   4  -1    3.90   12.10 
   4  -4  -1  -16.20   15.60 
  -4   4  -1   -1.50    9.40 
   4  -4  -1  -18.20    8.30 
  -4   4  -1   31.30   22.00 
   4  -4  -1   14.70   18.50 
  -4   4  -1    9.20   15.00 
   4   4  -1   31.40   18.80 
  -4   4  -1   10.00   14.00 
   4   4  -1    4.00   13.70 
  -4   4  -1   -2.20    7.30 
  -4  -4  -1    9.90    7.30 
   4   4  -1    3.30   11.70 
   4   4  -1    6.00   14.00 
  -4   4  -1    9.40   10.10 
  -4  -4  -1    6.60   11.70 
  -4  -4  -1    7.10   11.40 
   4   4  -1   15.60   16.10 
  -4   4  -1  -10.80    6.90 
   4  -4  -1   11.70   10.40 
  -4  -4  -1   10.40   17.40 
  -4  -4  -1   -0.40   10.00 
  -4  -4  -1  -17.80   12.90 
   4  -4  -1    1.50   11.20 
   4   4  -1    8.40   14.90 
  -4  -4  -1  -10.10   15.70 
  -4  -4  -1   -3.00   15.10 
   4  -4  -1    7.20   12.50 
   4   4  -1    5.10    8.90 
   4  -4  -1   -9.30   12.50 
  -4   4  -1    0.80    9.00 
   4   4  -1  -13.50   16.80 
  -4   4  -1   -1.50   10.60 
  -4   4  -1   16.50    9.50 
   4  -4  -1    4.90   12.00 
  -4  -4   1  -14.60   13.00 
   4  -4   1    6.40    9.90 
  -4   4   1   19.50   15.50 
   4   4   1   15.30   19.80 
   4  -4   1   -2.10   11.10 
   4   4   1    8.60   10.00 
  -4  -4   1   10.10   10.40 
   4  -4   1    8.50   12.10 
  -4   4   1    0.40   16.70 
  -4  -4   1  -11.40   10.70 
  -4  -4   1   37.90   24.00 
   4  -4   1    9.00   13.30 
   4  -4   1   11.00    9.50 
   4  -4   1  -11.30   17.40 
   4  -4   1  -17.90    9.80 
  -4   4   1    4.50   12.10 
   4  -4   1    5.60    5.80 
  -4  -4   1   -1.00   13.50 
   4   4   1   12.90   13.90 
   4   4   1   13.30   18.20 
   4  -4   1   10.40   15.30 
   4  -4   1    4.70   14.10 
   4  -4   1    4.60    9.40 
   4  -4   1  -13.90   10.00 
   4  -4   1    9.20   20.70 
   4  -4   1    0.50   10.70 
  -4  -4   1  -17.10   10.00 
  -4  -4   1    5.10   13.40 
  -4  -4   1   46.30   24.50 
  -4   4   1    9.60   13.50 
  -4  -4   1   10.30   11.00 
  -4  -4   1   -5.30   14.40 
  -4  -4   1    3.60   19.40 
   4   4   1   -0.80   12.60 
  -4   4   1   -1.10    9.80 
  -4  -4   1   -2.40   17.40 
   4   4   1    5.90   13.20 
   4   4   1   -6.80   14.50 
  -4  -4   1    3.00   13.90 
   4  -4   1    7.00    7.80 
   4   4   1   14.20   14.10 
  -4  -4   1   -0.10   12.10 
  -4  -4   1    8.30   11.50 
  -4  -4   1   -4.50   13.40 
   4  -4   1   41.70   27.40 
   4   4   1    8.40   14.10 
   4   4   1  -12.00   10.50 
   4  -4   1   10.20    9.00 
   4   4   1   16.30   17.90 
  -4  -4   1   23.30   17.70 
  -4  -4   1   -4.20   11.10 
  -4  -4   1  -14.10   15.00 
  -4   4   1   -4.10   18.60 
   4  -4   1    2.00    4.70 
   4  -4   1    3.30    5.20 
   4  -4   1   -2.10   15.00 
   4  -4   1   21.60   14.20 
  -4   4   1   24.90   21.70 
  -4   4   1    0.70    7.10 
   4   4   1   37.00   18.80 
   4   4   1   16.30   22.90 
   4   4   1   -5.50    8.90 
  -4  -4   1    0.40   13.30 
  -4   4   1    9.40    8.60 
   4  -4   1   -3.70    7.60 
  -4   4   1   20.70   13.30 
  -4   4   1   27.10   14.30 
   4  -4   1    5.10   12.00 
   4   4   1   31.00   21.50 
  -4  -4   1   -5.30    8.60 
  -4   4   1   16.50   12.30 
   4  -4   1    2.00   13.00 
   4   4   1   -5.30    8.60 
  -4  -4   1   20.50   15.90 
   4   4   1   10.10   11.70 
  -4   4   1    6.20   11.80 
  -4  -4   1   49.20   26.00 
   4   4   1    3.10   11.10 
  -4  -4   1    3.70   13.30 
   4  -4   1   10.20   13.10 
  -4  -4   1    7.60   14.10 
  -4   5  -1  401.86   43.00 
   4  -5  -1  522.55   50.89 
   4  -5  -1  569.34   65.09 
   5   4  -1  475.55   78.49 
   5   4  -1  504.15   66.99 
  -4   5  -1  546.45   87.49 
   5   4  -1  440.56   69.79 
   5   4  -1  389.26   62.19 
  -4   5  -1  483.95   54.69 
  -5  -4  -1  395.06   70.59 
   5   4  -1  431.46   76.59 
  -5  -4  -1  457.05   74.49 
   5   4  -1  514.75   62.79 
  -5  -4  -1  427.56   36.50 
   4  -5  -1  504.85   53.59 
   4  -5  -1  492.25   66.89 
  -5  -4  -1  550.64   64.99 
  -5  -4  -1  412.36   56.39 
  -4   5  -1  505.05   48.10 
  -4   5  -1  404.56   62.09 
  -5  -4  -1  396.96   55.89 
   5   4  -1  509.85   59.39 
  -4   5  -1  323.27   43.40 
   4  -5  -1  479.35   60.29 
  -5  -4  -1  426.26   68.69 
   5   4  -1  547.65   61.59 
   4  -5  -1  458.55   55.59 
   4  -5  -1  522.35   62.59 
   5   4  -1  383.16   61.99 
  -5  -4  -1  441.56   61.39 
  -5  -4  -1  262.97   56.29 
  -5  -4  -1  406.66   60.29 
  -4   5  -1  386.76   50.99 
   4  -5  -1  562.24   57.29 
  -4   5  -1  382.76   55.39 
   4  -5  -1  404.86   34.70 
   4  -5  -1  406.96   74.59 
   4  -5  -1  481.75   58.99 
  -4   5  -1  398.56   52.39 
   5   4  -1  416.36   49.20 
   5   4  -1  410.06   61.09 
  -5  -4  -1  439.16   54.19 
   5   4  -1  409.46   61.99 
   5   4  -1  466.15   58.89 
   5   4  -1  411.66   56.39 
  -5  -4  -1  400.16   68.79 
  -5  -4  -1  495.65   60.09 
   4  -5  -1  425.26   51.39 
   4  -5  -1  484.25   67.69 
   5   4  -1  419.86   52.29 
  -4   5  -1  365.56   65.19 
  -5  -4  -1  435.66   69.69 
  -5  -4  -1  465.75   60.69 
  -5  -4  -1  361.36   64.59 
  -5  -4  -1  374.46   40.00 
  -5  -4  -1  412.16   35.30 
   4  -5  -1  416.46   68.09 
  -5  -4  -1  403.56   61.79 
  -5  -4  -1  414.06   39.80 
   5   4  -1  462.65   54.69 
   4  -5  -1  457.65   54.99 
  -4   5  -1  468.35   61.59 
   4  -5  -1  533.15   55.89 
  -4   5  -1  487.25   64.09 
  -4   5  -1  498.05   55.59 
   5   4  -1  321.57   64.99 
   5   4  -1  417.16   60.19 
   4  -5  -1  449.36   68.99 
   4  -5  -1  552.94   56.79 
  -5  -4  -1  366.86   69.99 
   4  -5  -1  343.27   55.59 
  -5  -4  -1  300.47   62.49 
  -5  -4  -1  364.96   61.59 
   4  -5   1  442.16   57.69 
   5   4   1  397.96   59.29 
   5   4   1  285.47   48.70 
  -5  -4   1  537.55   68.59 
  -4   5   1  372.96   57.69 
   5   4   1  451.55   53.99 
   4  -5   1  391.06   32.20 
   4  -5   1  437.86   72.19 
   4  -5   1  345.47   29.90 
   4  -5   1  315.87   55.19 
  -5  -4   1  424.86   68.19 
   4  -5   1  322.97   46.40 
   5   4   1  564.44   72.39 
  -4   5   1  421.66   36.90 
  -5  -4   1  462.55   66.39 
   5   4   1  451.45   74.59 
   5   4   1  403.36   49.80 
   4  -5   1  471.05   59.99 
  -5  -4   1  529.05   74.99 
   4  -5   1  441.96   47.20 
  -4   5   1  420.16   56.89 
  -5  -4   1  549.74   71.09 
  -5  -4   1  453.25   51.79 
  -5  -4   1  500.85   64.69 
   4  -5   1  395.36   32.50 
   4  -5   1  493.55   49.70 
   4  -5   1  514.45   60.19 
   4  -5   1  442.36   34.80 
  -4   5   1  367.86   64.09 
  -5  -4   1  423.76   69.99 
  -4   5   1  496.15   59.49 
   5   4   1  356.16   52.79 
  -4   5   1  466.25   50.19 
  -5  -4   1  342.77   58.59 
   5   4   1  495.55   65.89 
   4  -5   1  384.56   51.69 
   4  -5   1  423.76   50.39 
  -5  -4   1  503.75   51.79 
   4  -5   1  316.67   58.69 
   5   4   1  478.15   64.09 
  -5  -4   1  561.54   80.79 
  -5  -4   1  464.55   65.59 
   4  -5   1  506.85   68.19 
  -5  -4   1  470.35   63.79 
   5   4   1  440.36   58.39 
   5   4   1  498.25   76.39 
   5   4   1  453.85   65.49 
  -4   5   1  322.37   51.19 
  -4   5   1  385.16   53.79 
  -4   5   1  477.25   39.20 
  -4   5   1  371.86   56.49 
  -5  -4   1  479.35   51.39 
   4  -5   1  379.66   76.19 
   5   4   1  288.07   62.09 
   4  -5   1  384.96   47.50 
  -5  -4   1  515.25   68.39 
  -5  -4   1  366.26   65.39 
  -5  -4   1  434.76   50.39 
   4  -5   1  366.26   54.19 
   4  -5   1  377.66   50.49 
   4  -5   1  429.16   59.19 
   4  -5   1  474.25   63.69 
  -4   5   1  359.76   52.29 
   5   4   1  482.45   35.70 
   5   4   1  356.46   58.29 
  -5  -4   1  428.86   57.79 
   4  -5   1  489.35   61.69 
  -5  -4   1  498.35   57.19 
   4  -5   1  363.96   31.00 
   4  -5   1  421.86   34.80 
  -5  -4   1  431.26   76.99 
   5   4   1  501.15   64.19 
   4  -5   1  417.06   75.69 
  -4   5   1  311.27   65.99 
   5   4   1  419.36   55.29 
  -5  -4   1  434.56   65.49 
  -4   5   1  418.76   42.30 
   4  -5   1  390.46   57.69 
   4  -5   1  416.06   30.40 
  -5  -3  -1  484.95   69.59 
  -5  -3  -1  348.97   53.89 
   3  -5  -1  497.95   76.19 
  -5  -3  -1  334.97   53.49 
  -3   5  -1  356.96   50.49 
  -3   5  -1  473.05   64.69 
   5   3  -1  386.76   48.00 
   5   3  -1  333.57   50.79 
   5   3  -1  368.66   76.79 
   5   3  -1  292.07   42.90 
   5   3  -1  375.36   69.99 
  -3   5  -1  363.56   27.90 
   3  -5  -1  377.86   60.19 
   5   3  -1  286.37   52.39 
  -3   5  -1  432.66   47.50 
   3  -5  -1  342.67   28.50 
  -3   5  -1  385.66   51.59 
  -5  -3  -1  480.55   43.00 
  -5  -3  -1  296.97   56.39 
   3  -5  -1  350.66   42.50 
   5   3  -1  364.66   53.29 
  -5  -3  -1  355.56   66.19 
  -3   5  -1  331.97   63.39 
  -5  -3  -1  426.26   54.79 
   3  -5  -1  407.26   38.40 
   3  -5  -1  432.76   52.29 
  -5  -3  -1  367.26   52.09 
   5   3  -1  362.56   67.69 
  -5  -3  -1  367.86   66.49 
   5   3  -1  277.17   48.70 
   3  -5  -1  367.96   53.19 
   3  -5  -1  309.27   49.80 
  -3   5  -1  321.67   49.90 
   3  -5  -1  364.76   48.60 
   3  -5  -1  448.36   53.19 
  -3   5  -1  391.16   36.80 
   3  -5  -1  390.66   51.39 
   3  -5  -1  372.96   55.59 
   3  -5  -1  377.36   46.10 
  -3   5  -1  406.86   47.10 
  -5  -3  -1  350.86   49.60 
  -5  -3  -1  362.86   63.59 
   3  -5  -1  472.35   52.49 
  -5  -3  -1  352.56   47.70 
  -3   5  -1  419.16   48.80 
  -3   5  -1  473.95   66.09 
  -5  -3  -1  373.76   61.69 
  -5  -3  -1  440.86   55.69 
  -5  -3  -1  346.97   51.49 
  -5  -3  -1  334.67   57.59 
  -5  -3  -1  369.86   39.80 
   5   3  -1  430.96   53.19 
   5   3  -1  426.56   62.09 
   5   3  -1  408.16   50.39 
   5   3  -1  340.07   54.19 
  -3   5  -1  406.16   71.59 
   3  -5  -1  431.36   44.10 
   3  -5  -1  391.36   51.09 
  -3   5  -1  459.55   50.49 
  -5  -3  -1  397.46   64.89 
   5   3  -1  416.26   60.99 
  -5  -3  -1  391.76   60.39 
   5   3  -1  404.86   60.69 
   5   3  -1  359.26   52.49 
  -5  -3  -1  398.16   40.20 
   5   3  -1  382.96   51.59 
  -3   5  -1  369.56   54.19 
   3  -5  -1  357.76   45.80 
   3  -5  -1  417.66   54.09 
   5   3  -1  351.16   54.19 
   3  -5  -1  327.57   58.19 
  -5  -3  -1  304.87   47.20 
   3  -5  -1  468.15   56.39 
   5   3  -1  352.36   51.79 
  -5  -3   1  414.76   47.10 
   5   3   1  235.98   43.80 
   3  -5   1  447.16   58.19 
  -5  -3   1  351.36   67.59 
  -3   5   1  395.86   31.20 
   3  -5   1  352.26   54.79 
   3  -5   1  327.27   53.09 
   3  -5   1  390.56   33.80 
   5   3   1  430.66   60.49 
   5   3   1  442.56   66.79 
  -3   5   1  316.97   44.90 
  -5  -3   1  525.05   49.70 
  -5  -3   1  415.36   55.99 
  -3   5   1  389.96   31.30 
   5   3   1  323.17   62.59 
   3  -5   1  362.46   39.10 
  -3   5   1  418.96   61.49 
   3  -5   1  336.57   47.70 
   5   3   1  357.56   52.59 
  -3   5   1  323.87   48.20 
  -5  -3   1  326.77   54.49 
   3  -5   1  313.27   49.30 
   5   3   1  425.96   47.70 
   5   3   1  408.96   65.09 
  -5  -3   1  354.66   51.59 
  -3   5   1  351.96   52.09 
   5   3   1  412.36   60.59 
  -5  -3   1  475.05   58.69 
   5   3   1  432.66   58.99 
  -5  -3   1  259.07   51.09 
  -5  -3   1  385.56   63.09 
   3  -5   1  448.16   74.09 
  -3   5   1  368.46   48.10 
   3  -5   1  360.06   52.19 
   3  -5   1  395.46   34.30 
  -5  -3   1  368.66   56.39 
   5   3   1  387.76   59.09 
   3  -5   1  438.56   67.29 
   3  -5   1  329.77   46.00 
   3  -5   1  406.56   61.19 
   3  -5   1  391.26   52.99 
   5   3   1  337.57   48.90 
   3  -5   1  415.16   43.60 
   5   3   1  386.86   56.39 
  -5  -3   1  355.26   55.39 
   3  -5   1  298.27   47.50 
  -5  -3   1  412.66   63.39 
   5   3   1  347.37   60.29 
  -3   5   1  350.86   51.09 
  -3   5   1  442.66   69.79 
  -3   5   1  382.56   42.40 
   5   3   1  318.97   48.20 
  -3   5   1  369.26   53.89 
  -3   5   1  426.86   66.09 
   5   3   1  284.27   48.90 
   5   3   1  426.66   36.90 
  -5  -3   1  355.36   53.19 
   3  -5   1  455.15   57.29 
   5   3   1  438.76   52.49 
   3  -5   1  372.46   36.50 
  -5  -3   1  388.76   58.89 
  -5  -3   1  382.46   56.89 
   3  -5   1  450.05   49.00 
  -5  -3   1  297.57   43.00 
  -5  -3   1  521.35   74.59 
   3  -5   1  279.77   48.70 
   5   3   1  314.27   48.80 
  -3   5   1  352.16   48.80 
   3  -5   1  414.96   36.60 
  -5  -3   1  462.75   70.49 
  -3   5   1  283.97   45.10 
   5   3   1  391.56   65.19 
   3  -5   1  317.47   49.30 
  -5  -3   1  429.66   50.29 
   5   3   1  390.66   58.39 
   3  -5   1  414.26   42.20 
  -5  -3   1  415.56   59.69 
   5   3   1  415.96   49.70 
   3  -5   1  321.47   63.19 
  -5  -3   1  331.27   62.49 
   3  -5   1  346.27   52.69 
  -3   5   1  378.66   38.30 
  -5  -2  -1  143.99   36.30 
  -5  -2  -1  228.68   48.20 
   5   2  -1  312.97   43.60 
  -5  -2  -1  128.09   31.10 
   2  -5  -1  222.38   35.20 
  -2   5  -1  151.88   24.70 
   5   2  -1  170.68   36.10 
  -5  -2  -1  200.88   35.30 
   2  -5  -1  208.18   21.50 
  -5  -2  -1  202.98   45.10 
   5   2  -1  154.08   33.60 
  -2   5  -1  221.18   21.90 
   5   2  -1  170.38   31.30 
   5   2  -1  231.48   52.09 
   2  -5  -1  281.17   40.90 
  -5  -2  -1  145.69   38.50 
  -2   5  -1  160.48   30.60 
  -2   5  -1  217.58   32.90 
  -5  -2  -1  161.08   39.00 
   5   2  -1  149.09   33.50 
   2  -5  -1  165.78   35.30 
   5   2  -1  301.77   48.60 
  -5  -2  -1  203.88   37.10 
   2  -5  -1  158.48   29.40 
   5   2  -1  163.08   32.70 
   5   2  -1  249.68   53.79 
  -2   5  -1  223.18   39.50 
  -5  -2  -1  246.58   39.40 
   2  -5  -1  180.58   24.40 
   2  -5  -1  173.58   37.90 
  -5  -2  -1  276.07   32.90 
   2  -5  -1  212.78   20.00 
   2  -5  -1  229.48   41.10 
   5   2  -1  164.18   33.80 
   2  -5  -1  233.68   35.90 
   2  -5  -1  218.68   34.50 
   2  -5  -1  195.18   41.90 
   2  -5  -1  195.18   17.60 
  -5  -2  -1  203.68   47.40 
  -5  -2  -1  263.37   38.70 
   2  -5  -1  194.58   19.60 
  -2   5  -1  219.88   40.60 
  -2   5  -1  196.98   37.80 
   5   2  -1  168.88   45.90 
   5   2  -1  138.19   35.90 
   2  -5  -1  208.18   32.50 
  -5  -2  -1  257.57   41.30 
  -2   5  -1  233.58   34.70 
  -5  -2  -1  158.48   28.20 
   5   2  -1  186.38   39.80 
   5   2  -1  162.68   38.90 
  -5  -2  -1  177.88   32.20 
   5   2  -1  166.08   33.30 
   2  -5  -1  215.38   35.30 
   2  -5  -1  155.68   35.60 
  -2   5  -1  202.48   33.70 
  -5  -2  -1  251.87   37.20 
  -5  -2  -1  181.98   40.00 
  -2   5  -1  190.28   45.30 
   2  -5  -1  175.38   27.20 
   2  -5  -1  153.28   28.70 
  -2   5  -1  203.88   49.20 
   2  -5  -1  194.08   35.70 
   2  -5  -1  266.27   30.40 
   2  -5  -1  201.78   34.10 
  -5  -2  -1  235.48   30.20 
  -5  -2  -1  165.38   32.50 
  -2   5  -1  161.58   27.80 
  -2   5  -1  165.08   39.50 
   5   2  -1  118.09   31.50 
  -5  -2  -1  314.47   56.79 
  -5  -2  -1  168.48   42.00 
   5   2  -1  171.18   35.10 
  -2   5  -1  198.88   25.50 
   2  -5  -1  202.18   35.20 
   2  -5  -1  190.68   31.70 
  -2   5  -1  230.68   32.20 
   5   2  -1  174.28   27.40 
  -2   5  -1  216.08   26.40 
   2  -5  -1  214.68   22.20 
   5   2  -1  234.98   40.40 
   5   2  -1  197.48   38.60 
   2  -5  -1  201.58   21.20 
  -2   5  -1  260.27   37.00 
  -2   5   1  206.98   45.50 
  -5  -2   1  215.18   36.60 
  -2   5   1  174.68   32.70 
   2  -5   1  183.68   33.80 
   5   2   1  231.88   42.40 
  -5  -2   1  188.88   46.30 
  -5  -2   1  159.98   37.20 
   5   2   1  181.78   41.10 
  -2   5   1  145.59   34.30 
   2  -5   1  225.78   38.40 
  -5  -2   1  168.18   40.30 
   2  -5   1  178.08   30.70 
  -5  -2   1  181.48   31.30 
   2  -5   1  182.58   33.70 
  -5  -2   1  180.38   46.30 
   2  -5   1  151.58   33.10 
   5   2   1  190.88   35.80 
   2  -5   1  168.38   32.60 
  -2   5   1  233.98   33.80 
   2  -5   1  289.37   44.90 
   5   2   1  252.37   37.20 
   2  -5   1  205.18   31.00 
   5   2   1  207.38   42.70 
   5   2   1  234.78   38.20 
  -5  -2   1  220.88   30.20 
  -2   5   1  211.18   36.40 
   2  -5   1  235.58   39.30 
  -2   5   1  183.58   25.80 
  -5  -2   1  186.68   38.60 
   5   2   1  245.18   38.10 
   5   2   1  204.78   38.00 
   2  -5   1  211.68   44.80 
  -5  -2   1  187.28   35.10 
   2  -5   1  147.69   31.30 
   2  -5   1  165.18   26.50 
  -5  -2   1  248.58   30.90 
  -5  -2   1  202.68   45.10 
  -2   5   1  173.88   22.40 
  -5  -2   1  250.47   41.40 
   2  -5   1   95.69   31.20 
   2  -5   1  245.38   30.10 
  -2   5   1  195.88   15.70 
   5   2   1  219.78   45.30 
   2  -5   1  155.48   28.10 
  -2   5   1  184.78   21.90 
   5   2   1  200.48   31.80 
   5   2   1  153.38   32.50 
   5   2   1  251.87   51.79 
   2  -5   1  203.58   40.20 
  -5  -2   1  211.88   39.50 
  -2   5   1  182.78   22.50 
  -5  -2   1  322.87   35.80 
   5   2   1  112.59   27.50 
   5   2   1  229.48   40.80 
   2  -5   1  212.38   31.60 
  -5  -2   1  262.07   40.60 
   2  -5   1  189.88   30.70 
  -5  -2   1  177.68   39.60 
  -2   5   1  112.89   25.40 
   2  -5   1  255.77   44.10 
   2  -5   1  109.89   37.60 
   5   2   1  225.28   35.70 
   2  -5   1  224.98   23.00 
   5   2   1  119.79   35.00 
   2  -5   1  191.48   34.90 
  -2   5   1  176.38   32.20 
   5   2   1  246.08   30.80 
   2  -5   1  221.68   24.60 
  -2   5   1  200.08   24.30 
  -5  -2   1  224.48   43.80 
  -2   5   1  173.28   23.30 
  -5  -2   1  181.58   41.10 
   5   2   1  208.58   42.00 
  -5  -2   1  244.98   40.00 
  -5  -2   1  233.78   44.50 
   2  -5   1  226.28   30.10 
   2  -5   1  162.68   32.10 
  -5  -2   1  248.38   38.50 
   5   2   1  195.28   36.70 
   5   2   1  176.28   27.80 
  -2   5   1  145.79   32.90 
  -2   5   1  250.87   43.80 
  -5  -1  -1  896.61   92.69 
   5   1  -1  866.21   73.89 
   5   1  -1  953.00   84.79 
  -5  -1  -1  833.72   68.19 
  -5  -1  -1 1151.08  117.99 
   1  -5  -1  856.01   68.89 
   5   1  -1  950.90   80.79 
   1  -5  -1  865.51   64.49 
  -5  -1  -1  794.32   95.69 
   1  -5  -1  896.71   71.59 
   1  -5  -1  951.70   73.79 
  -1   5  -1  866.71   73.29 
  -1   5  -1  981.50   71.29 
   5   1  -1  770.22   76.89 
  -5  -1  -1  792.82   95.69 
   1  -5  -1 1015.70  101.59 
  -5  -1  -1  788.02   88.29 
  -1   5  -1  798.52   70.79 
  -5  -1  -1  877.91   74.89 
   5   1  -1  922.51   78.59 
   1  -5  -1  961.50   69.79 
  -1   5  -1  827.02   94.69 
  -5  -1  -1  843.22   80.59 
   1  -5  -1  848.52   76.19 
   5   1  -1  825.52   72.89 
   1  -5  -1  800.42   74.29 
   1  -5  -1 1015.30   66.89 
  -1   5  -1 1006.50   99.49 
  -5  -1  -1  881.61   97.59 
  -5  -1  -1  798.92   74.69 
   5   1  -1  900.51   63.09 
   1  -5  -1  909.11   72.89 
   5   1  -1  904.71  109.59 
   5   1  -1  820.32   75.99 
  -5  -1  -1  844.52   70.29 
  -1   5  -1  936.61   71.39 
  -5  -1  -1  811.22   68.79 
  -1   5  -1  840.62   73.49 
   5   1  -1  944.51   74.39 
   1  -5  -1  888.91   63.89 
   5   1  -1  812.82   88.99 
  -5  -1  -1  783.02   70.89 
   1  -5  -1  830.42   67.09 
   5   1  -1  845.52   96.69 
   1  -5  -1  855.31   62.09 
  -5  -1  -1  939.21   67.49 
   1  -5  -1  998.10   77.09 
   1  -5  -1  832.12   62.89 
  -5  -1  -1  887.11   83.19 
  -1   5  -1  968.10  101.89 
   1  -5  -1  924.91   75.49 
   1  -5  -1  848.82   73.69 
   5   1  -1 1031.10  109.09 
  -1   5  -1  860.31   74.39 
   1  -5  -1  904.71   64.59 
  -5  -1  -1  927.11   75.99 
  -1   5  -1  928.31   58.29 
  -1   5  -1  985.30   72.79 
  -5  -1  -1  850.41   92.49 
   1  -5  -1  759.62   87.89 
  -5  -1  -1  983.20   73.29 
  -1   5  -1  905.61   70.69 
   1  -5  -1  935.01   62.69 
   1  -5  -1  918.01   79.09 
  -1   5  -1  995.80   71.09 
   5   1  -1  845.92   73.69 
   5   1  -1  795.02   74.09 
  -5  -1  -1  840.72   69.99 
  -1   5  -1  839.32   71.39 
   5   1  -1  851.81   72.89 
   1  -5  -1  913.91   81.69 
  -1   5  -1  869.91   72.49 
  -5  -1  -1  819.92   73.69 
   5   1  -1  928.81   77.99 
   1  -5  -1  899.91   63.59 
   5   1  -1  891.01   78.89 
   1  -5  -1  999.60   71.89 
   5   1  -1  894.11   76.19 
  -1   5  -1  895.51   71.59 
   1  -5  -1  947.91   74.49 
  -1   5  -1  830.12   87.99 
   1  -5  -1  821.02   77.39 
   5   1  -1  767.02   74.59 
   5   1  -1  870.71   78.39 
  -1   5  -1  977.10   82.09 
  -5  -1  -1  918.01   78.59 
  -5  -1   1 1013.50   75.19 
  -1   5   1  776.52   66.09 
   1  -5   1  952.30   71.39 
  -1   5   1  956.50   76.89 
   5   1   1  883.81   68.99 
  -5  -1   1 1061.29   75.29 
   1  -5   1  895.01   81.59 
  -1   5   1  884.41   67.89 
  -5  -1   1  992.10   61.49 
   1  -5   1  924.51   74.59 
  -5  -1   1  872.91   98.39 
   1  -5   1  827.62   88.49 
   1  -5   1  811.32   71.89 
   5   1   1 1071.19  107.89 
   5   1   1  871.81   71.49 
   5   1   1  859.71   74.29 
  -1   5   1  868.71   63.69 
   5   1   1  859.01   74.29 
   1  -5   1  751.32   87.79 
   1  -5   1  805.42   73.09 
   5   1   1  896.51   94.69 
  -1   5   1  842.82   73.69 
   1  -5   1  835.12   69.99 
   1  -5   1  893.41   73.39 
   5   1   1  971.60   76.69 
  -5  -1   1 1038.50   75.99 
   5   1   1  901.91   95.79 
  -5  -1   1  802.32   72.19 
   1  -5   1  836.92   91.79 
  -5  -1   1  861.21   94.59 
  -1   5   1  834.32   65.59 
   1  -5   1  965.70   77.69 
   5   1   1  993.00   71.09 
  -5  -1   1 1029.80   87.49 
  -5  -1   1  962.20   75.59 
  -1   5   1  803.12   67.39 
   1  -5   1  998.70  103.59 
   5   1   1 1038.20   78.49 
   1  -5   1  906.51   93.59 
   1  -5   1  798.32   73.99 
   1  -5   1  862.71   68.49 
   1  -5   1  852.71   76.59 
   1  -5   1  921.71   73.59 
   1  -5   1  894.61   79.89 
  -5  -1   1  875.81   69.59 
   1  -5   1  912.71   60.19 
  -5  -1   1 1112.79  104.29 
  -1   5   1  880.61   64.89 
   1  -5   1  682.93   68.69 
   5   1   1 1093.49   91.79 
  -1   5   1  917.21   63.69 
   5   1   1  882.31   76.39 
  -5  -1   1  926.21   81.19 
   5   1   1  916.71   98.89 
  -1   5   1  913.41   79.09 
  -5  -1   1  891.61   68.69 
  -1   5   1  812.72   76.29 
   5   1   1  941.71   73.79 
  -1   5   1  894.91   75.69 
   1  -5   1  901.51   69.89 
  -5  -1   1  934.11   77.59 
  -5  -1   1  812.42   77.19 
  -5  -1   1  813.52   83.59 
   1  -5   1  972.40   71.39 
  -1   5   1 1023.10  105.19 
   1  -5   1  897.81   88.59 
   5   1   1  936.71   73.79 
  -5  -1   1  894.91   80.89 
   1  -5   1  917.41   74.49 
  -5  -1   1  792.92   74.89 
  -5  -1   1  945.71   81.49 
   1  -5   1  910.01   73.69 
   5   1   1 1017.00  100.99 
  -1   5   1  775.22   66.99 
  -5  -1   1  928.71   70.99 
   5   1   1  972.80   74.69 
   5   1   1  922.11   64.69 
   5   1   1 1048.00  104.99 
  -5  -1   1 1016.00  108.29 
  -1   5   1  807.82   65.49 
   0   5  -1 3705.43  230.98 
   0   5  -1 3423.06  229.98 
  -5   0  -1 3750.62  243.68 
   0  -5  -1 3439.56  243.88 
   5   0  -1 4016.80  253.37 
   5   0  -1 3456.75  241.78 
  -5   0  -1 3502.55  247.68 
   0   5  -1 3517.15  238.98 
   0   5  -1 3497.95  239.58 
   5   0  -1 3755.82  241.08 
  -5   0  -1 3385.76  249.97 
   0  -5  -1 3471.45  235.18 
  -5   0  -1 3689.03  242.78 
  -5   0  -1 3539.55  243.38 
  -5   0  -1 3505.45  233.08 
   0   5  -1 3407.06  236.38 
   5   0  -1 3538.45  259.37 
   5   0  -1 3466.55  232.88 
   0   5  -1 3568.84  238.98 
   0   5  -1 3657.73  232.98 
   5   0  -1 3707.43  232.38 
   0   5  -1 3590.54  242.08 
  -5   0  -1 3372.66  240.98 
  -5   0  -1 3640.14  226.28 
   0  -5  -1 3706.13  229.78 
   0   5  -1 3751.62  238.18 
   5   0  -1 3577.14  234.48 
   5   0  -1 3501.65  235.38 
   0  -5  -1 3536.45  221.08 
   0   5  -1 3443.76  240.28 
  -5   0  -1 3293.07  228.38 
   0  -5  -1 3331.97  235.68 
   0   5  -1 3826.02  247.18 
   0  -5  -1 3550.64  235.68 
   0  -5  -1 3705.03  241.38 
   0  -5  -1 3527.95  224.98 
  -5   0  -1 3573.24  242.38 
   0  -5  -1 3578.04  228.08 
   5   0  -1 3548.04  232.48 
   5   0  -1 3749.02  241.68 
   5   0  -1 3481.55  242.78 
   0   5  -1 3454.35  229.18 
   5   0  -1 3698.23  235.78 
   0   5  -1 3864.31  233.48 
   5   0  -1 3687.63  237.48 
   0  -5  -1 3561.34  231.78 
   0  -5  -1 3456.25  235.08 
   5   0  -1 3673.53  245.38 
   5   0  -1 3648.83  216.38 
   0  -5  -1 3515.25  239.48 
  -5   0  -1 3325.87  239.28 
   5   0  -1 3688.63  245.38 
   5   0  -1 3425.96  242.28 
   5   0  -1 3571.04  235.08 
  -5   0  -1 3488.35  233.78 
  -5   0  -1 3784.72  236.68 
   0  -5  -1 3693.53  240.38 
   5   0  -1 3731.53  233.28 
  -5   0  -1 3666.33  232.58 
   5   0  -1 3353.56  237.38 
   0  -5  -1 3602.34  225.78 
   0   5  -1 3483.35  243.18 
   0  -5  -1 3721.13  227.48 
   0   5  -1 3743.93  242.38 
   0  -5  -1 3445.16  227.98 
   0  -5  -1 3345.47  237.38 
   0  -5  -1 3597.04  225.58 
   0   5  -1 3678.53  235.78 
  -5   0  -1 3546.25  232.48 
  -5   0  -1 3599.84  235.38 
   0   5  -1 3542.75  246.08 
  -5   0  -1 3737.93  235.58 
   0  -5  -1 3688.03  241.98 
   5   0  -1 3778.12  218.58 
   5   0  -1 3863.11  238.98 
  -5   0  -1 3840.52  243.18 
   0  -5  -1 3789.22  238.68 
   5   0  -1 3769.82  235.18 
   0  -5  -1 3619.94  243.58 
  -5   0  -1 3318.37  244.08 
   5   0  -1 3369.36  237.98 
   5   0  -1 3792.12  220.48 
  -5   0  -1 3774.02  231.28 
   0  -5  -1 3424.56  229.38 
  -5   0   1 3735.13  240.78 
   0  -5   1 3645.04  245.28 
   5   0   1 3380.46  232.58 
  -5   0   1 3835.02  251.47 
   0  -5   1 3778.22  240.38 
   5   0   1 3757.72  232.38 
   0  -5   1 3652.63  236.28 
  -5   0   1 3603.94  230.08 
  -5   0   1 3522.85  239.78 
   0  -5   1 3568.14  234.58 
   0  -5   1 3739.53  241.58 
   0  -5   1 3581.64  239.38 
   0   5   1 3642.54  237.58 
  -5   0   1 3793.32  231.78 
   0  -5   1 3586.24  221.88 
  -5   0   1 3770.52  236.38 
   0  -5   1 3556.94  229.18 
   0  -5   1 3460.65  234.28 
   0   5   1 3474.85  224.88 
   0   5   1 3607.54  240.68 
  -5   0   1 3634.94  247.08 
  -5   0   1 3700.33  237.38 
  -5   0   1 3714.73  237.28 
   0   5   1 3759.02  225.38 
   0   5   1 3599.34  238.38 
   0   5   1 3577.44  233.48 
   0   5   1 3682.13  225.68 
   0   5   1 3606.44  233.78 
   0  -5   1 3885.31  236.28 
   0  -5   1 3918.61  234.98 
   5   0   1 3558.24  234.28 
   5   0   1 3498.05  245.68 
   5   0   1 3664.13  237.98 
   0   5   1 3653.13  230.88 
   5   0   1 3533.45  259.87 
   5   0   1 3847.72  227.58 
   0  -5   1 3829.82  239.88 
  -5   0   1 3378.26  233.18 
   0   5   1 3469.95  224.48 
  -5   0   1 3484.35  232.98 
   5   0   1 3657.73  226.08 
   5   0   1 3770.72  238.88 
   0  -5   1 3578.54  233.98 
   5   0   1 3576.84  239.58 
  -5   0   1 3558.54  230.78 
   0   5   1 3681.73  240.18 
   0  -5   1 3407.86  242.88 
   5   0   1 3636.44  232.18 
   0  -5   1 3363.96  236.48 
   5   0   1 3494.15  232.48 
   5   0   1 3650.33  236.58 
   0  -5   1 3632.14  242.68 
   0  -5   1 3819.32  235.58 
   5   0   1 3684.33  231.38 
   0  -5   1 3551.34  232.88 
   0   5   1 3491.15  224.48 
  -5   0   1 3552.84  233.88 
   5   0   1 3651.43  251.87 
  -5   0   1 3644.24  232.38 
  -5   0   1 3857.01  243.38 
   0  -5   1 3654.93  232.38 
   0  -5   1 3396.76  245.08 
   0   5   1 3485.55  229.38 
   0  -5   1 3714.93  236.48 
  -5   0   1 3445.76  235.28 
   5   0   1 3781.72  245.28 
   5   0   1 3559.04  252.87 
   5   0   1 3673.43  235.58 
   5   0   1 3736.53  235.88 
   0   5   1 3801.62  251.07 
   0  -5   1 3657.03  233.58 
   0  -5   1 3309.77  236.88 
   0  -5   1 3559.24  245.38 
   5   0   1 3535.15  250.37 
  -5   0   1 3711.63  245.88 
   0   5   1 3419.86  239.68 
   0  -5   1 3970.80  242.98 
  -5   0   1 3509.05  241.68 
  -5   1  -1 1003.30   75.49 
  -5   1  -1  907.61   73.69 
  -1  -5  -1  836.12   75.89 
  -5   1  -1  857.61   66.59 
  -1  -5  -1  863.81   71.59 
   1   5  -1  796.72   74.89 
  -1  -5  -1  854.41   82.09 
  -5   1  -1  969.30   75.49 
   1   5  -1  977.30   64.49 
   5  -1  -1  915.41   76.99 
  -1  -5  -1  898.61   73.79 
   5  -1  -1  826.92   72.79 
  -5   1  -1  925.31   97.49 
   5  -1  -1  962.40   74.99 
   1   5  -1  947.71   95.79 
  -1  -5  -1  840.42   56.89 
   1   5  -1  821.82   78.89 
   1   5  -1  852.11   74.89 
   5  -1  -1  809.62   90.09 
   1   5  -1  934.31   83.89 
   5  -1  -1  948.21   79.69 
   5  -1  -1  855.81   69.29 
  -5   1  -1  979.40   83.49 
  -5   1  -1  850.71   67.29 
   5  -1  -1  867.41   79.49 
  -1  -5  -1  873.71   61.89 
   5  -1  -1  881.61   76.09 
   5  -1  -1  942.41   73.09 
   5  -1  -1  920.11   69.49 
  -1  -5  -1  903.21   78.69 
   1   5  -1  946.31   97.49 
  -1  -5  -1  870.21   68.29 
   1   5  -1  918.31   75.69 
   1   5  -1  986.80   78.19 
   5  -1  -1  906.61   68.69 
   1   5  -1  897.61   68.99 
   5  -1  -1  937.51   77.59 
   5  -1  -1  837.82   70.59 
  -1  -5  -1  976.80   63.29 
   5  -1  -1 1029.20   79.79 
   5  -1  -1  965.00   77.89 
  -5   1  -1  872.31  100.69 
   1   5  -1  914.51   81.59 
   5  -1  -1 1021.70   83.89 
   1   5  -1  922.51   67.79 
  -1  -5  -1  925.51   80.09 
   1   5  -1  956.90   76.19 
  -1  -5  -1  886.01   61.29 
   5  -1  -1  913.71   72.39 
   5  -1  -1  930.21   79.79 
  -5   1  -1  976.40   80.89 
  -1  -5  -1  753.92   74.19 
  -5   1  -1  841.12   94.39 
   5  -1  -1  899.31   84.69 
   1   5  -1  842.42   91.79 
  -1  -5  -1  812.52   72.49 
  -1  -5  -1  871.91   75.59 
   1   5  -1  891.01   77.19 
  -1  -5  -1  847.52   75.89 
  -1  -5  -1  820.82   71.39 
  -5   1  -1  877.11   72.29 
  -1  -5  -1  904.41   57.79 
   1   5  -1  845.22   79.49 
  -5   1  -1  931.71   78.59 
   5  -1  -1  878.81   67.49 
  -1  -5  -1  911.81   71.89 
  -1  -5  -1  989.30   81.49 
   5  -1  -1 1003.30   75.79 
   1   5  -1  976.20   84.39 
  -5   1  -1  783.12   88.99 
   1   5  -1  834.62   66.49 
  -1  -5  -1  733.63   85.59 
  -1  -5  -1  769.72   71.69 
  -1  -5  -1  941.51   62.09 
  -5   1  -1  999.40   75.79 
   5  -1  -1  930.51   97.09 
   5  -1  -1  979.00   72.59 
  -5   1  -1  947.71   68.09 
  -5   1  -1  916.11   72.79 
   1   5  -1  832.82   90.19 
   5  -1  -1  917.81  109.49 
  -5   1  -1  983.90   78.79 
  -1  -5  -1  889.21   91.29 
  -1  -5  -1 1062.79   99.99 
  -1  -5  -1  878.01   76.19 
   5  -1   1  965.80   73.79 
   5  -1   1  782.72   70.49 
  -1  -5   1  892.11   72.79 
   5  -1   1 1038.00  112.59 
  -1  -5   1  979.80   79.29 
  -1  -5   1  974.00   95.59 
  -1  -5   1  928.81   72.29 
  -5   1   1  900.31   67.49 
  -1  -5   1  845.42   74.89 
  -5   1   1  880.11   76.99 
  -5   1   1  847.32   72.09 
  -5   1   1  967.20   67.19 
   5  -1   1  982.80   75.09 
  -1  -5   1 1106.59   81.19 
  -1  -5   1  910.01   79.89 
  -5   1   1  937.71   75.69 
   1   5   1  866.61   61.79 
   5  -1   1  909.11   68.79 
  -1  -5   1  863.71   82.19 
   1   5   1  879.01   59.09 
   5  -1   1  886.71   66.59 
   1   5   1 1001.30   70.09 
  -1  -5   1  951.50   98.29 
   1   5   1  889.91   74.99 
   1   5   1  734.63   83.59 
  -1  -5   1  908.71   75.89 
   5  -1   1  912.41  102.09 
  -1  -5   1  955.70   73.69 
   1   5   1  820.42   77.29 
  -5   1   1  810.52   73.09 
  -1  -5   1 1025.10   83.39 
   1   5   1  903.11   74.49 
   5  -1   1 1039.00  111.79 
  -5   1   1  922.21   98.49 
   5  -1   1  880.51   75.09 
  -1  -5   1  849.61   80.79 
  -1  -5   1  965.90   70.59 
   1   5   1  927.81   62.29 
  -1  -5   1  968.60   76.89 
   1   5   1  909.31   61.79 
   5  -1   1  786.22   74.19 
  -1  -5   1  852.81   76.39 
  -5   1   1  909.11   78.79 
   5  -1   1  847.42   73.69 
  -1  -5   1  875.01   70.59 
  -1  -5   1  935.61   78.79 
  -5   1   1  970.00   66.69 
   1   5   1  912.71   76.09 
  -1  -5   1 1048.20   81.19 
  -1  -5   1  951.10   83.29 
   1   5   1  971.20   73.29 
   1   5   1  957.50   72.89 
   5  -1   1  920.91   77.19 
   1   5   1  933.61   61.89 
  -5   1   1  828.62   75.59 
  -5   1   1  933.41   66.79 
   5  -1   1  781.72   71.49 
  -1  -5   1  966.10   65.29 
   5  -1   1  846.52   67.19 
   1   5   1  806.42   66.29 
  -1  -5   1  897.41   80.09 
  -1  -5   1  868.11   73.39 
   5  -1   1  898.31   73.49 
   5  -1   1  876.51   73.99 
   1   5   1  776.72   91.59 
   5  -1   1  884.61   82.59 
   5  -1   1 1005.00   74.89 
   5  -1   1  895.41   70.19 
  -5   1   1  884.91   76.59 
   5  -1   1 1072.39  111.39 
   1   5   1  985.20   80.79 
  -5   1   1  865.01   77.39 
  -5   1   1  854.11   76.99 
  -5   1   1  874.01   76.49 
  -5   1   1  831.42   70.69 
   1   5   1  974.30   77.59 
  -5   1   1  850.11   81.09 
  -1  -5   1 1063.19   78.69 
   1   5   1  817.72   71.69 
   5  -1   1  975.40   72.09 
  -1  -5   1  999.40   85.99 
  -2  -5  -1  205.48   37.70 
   2   5  -1  142.39   34.10 
   2   5  -1  256.37   40.70 
   2   5  -1  162.78   39.90 
   2   5  -1  130.89   32.20 
   2   5  -1  174.28   27.20 
  -2  -5  -1  188.58   39.90 
   5  -2  -1  184.58   27.30 
  -2  -5  -1  241.78   27.10 
   2   5  -1  138.89   32.50 
  -2  -5  -1  199.08   36.50 
   2   5  -1  243.38   42.70 
   2   5  -1  233.28   32.40 
   5  -2  -1  197.48   43.20 
   5  -2  -1  289.77   37.60 
   2   5  -1  188.28   35.70 
   2   5  -1  174.88   37.50 
   5  -2  -1  173.18   25.10 
  -5   2  -1  240.28   38.70 
   5  -2  -1  111.29   33.20 
  -2  -5  -1  165.68   35.30 
  -5   2  -1  280.67   42.30 
   5  -2  -1  178.18   14.60 
  -2  -5  -1  158.68   31.40 
  -5   2  -1  189.28   41.30 
  -5   2  -1  196.18   35.80 
   5  -2  -1  205.88   33.10 
   5  -2  -1  242.08   27.60 
  -2  -5  -1  242.58   37.90 
  -5   2  -1  234.68   38.30 
  -5   2  -1  215.48   35.80 
   2   5  -1  164.58   32.50 
   5  -2  -1  179.28   27.00 
   5  -2  -1  221.08   38.20 
   5  -2  -1  162.68   25.10 
   2   5  -1  177.78   37.90 
   5  -2  -1  164.18   32.90 
   2   5  -1  205.08   45.40 
  -2  -5  -1  197.78   24.60 
  -2  -5  -1  189.18   31.70 
  -5   2  -1  199.48   31.70 
  -5   2  -1  198.98   34.10 
   5  -2  -1  194.18   32.60 
  -2  -5  -1  159.28   36.20 
  -2  -5  -1  241.88   38.50 
   2   5  -1  205.48   39.40 
  -2  -5  -1  180.38   36.20 
  -2  -5  -1  280.67   51.09 
   2   5  -1  151.28   38.90 
  -2  -5  -1  155.48   35.00 
  -5   2  -1  226.48   49.40 
  -5   2  -1  177.48   43.00 
   5  -2  -1  246.48   42.70 
  -2  -5  -1  190.78   38.20 
  -5   2  -1  178.98   35.40 
   5  -2  -1  192.28   49.60 
  -2  -5  -1  180.58   32.50 
   5  -2  -1  231.78   36.30 
  -2  -5  -1  192.28   39.00 
  -2  -5  -1  184.78   15.30 
   5  -2  -1  218.88   36.80 
  -2  -5  -1  210.08   42.30 
  -5   2  -1  166.68   28.20 
   2   5  -1  188.78   38.50 
   5  -2  -1  228.38   40.90 
  -5   2  -1  159.98   22.50 
   2   5  -1  255.67   45.60 
  -5   2  -1  177.88   28.80 
   5  -2  -1  151.78   30.50 
  -5   2  -1  192.88   24.10 
  -2  -5  -1  194.38   15.30 
   5  -2  -1  219.38   36.50 
   2   5  -1  208.88   30.10 
   5  -2  -1  268.37   39.80 
   5  -2  -1  197.48   17.40 
  -2  -5  -1  239.68   43.20 
  -5   2  -1  255.97   50.19 
  -2  -5  -1  122.09   30.30 
  -2  -5  -1  249.48   43.70 
   5  -2  -1  165.68   33.50 
   2   5  -1  203.18   42.20 
   5  -2  -1  201.18   29.30 
   5  -2  -1  142.39   33.10 
  -5   2   1  199.28   45.20 
  -2  -5   1  163.88   38.90 
  -2  -5   1  257.47   44.10 
  -5   2   1  138.09   31.40 
   2   5   1  220.58   38.80 
   5  -2   1  170.18   25.30 
   2   5   1  195.68   40.40 
  -2  -5   1  158.28   41.40 
  -2  -5   1  250.77   41.70 
  -2  -5   1  226.08   41.60 
   2   5   1  194.38   29.10 
   5  -2   1  235.98   54.49 
  -5   2   1  204.08   41.50 
   5  -2   1  213.18   31.50 
   2   5   1  221.48   35.30 
  -5   2   1  158.08   33.00 
   5  -2   1  221.38   36.40 
   5  -2   1  169.18   26.00 
   5  -2   1  227.38   35.30 
  -5   2   1  164.88   22.80 
  -2  -5   1  213.78   39.10 
   5  -2   1  189.58   33.60 
   5  -2   1  232.38   37.00 
   2   5   1  158.98   32.70 
   2   5   1  203.28   25.80 
  -5   2   1  203.78   22.10 
  -5   2   1  155.38   32.90 
  -2  -5   1  293.07   44.90 
  -2  -5   1  159.88   28.30 
  -2  -5   1  167.88   28.70 
  -2  -5   1  199.78   43.00 
   5  -2   1  238.68   38.80 
  -2  -5   1  187.18   28.60 
   5  -2   1  203.48   29.50 
  -5   2   1  203.68   40.60 
  -2  -5   1  211.58   38.90 
  -5   2   1  179.08   33.20 
   2   5   1  156.18   32.70 
   2   5   1  204.38   39.30 
  -5   2   1  248.08   24.70 
  -5   2   1  197.38   33.60 
   5  -2   1  209.28   34.40 
  -5   2   1  186.18   31.30 
   2   5   1  245.98   43.70 
  -5   2   1  185.38   34.40 
   5  -2   1  197.18   32.90 
   5  -2   1  182.38   36.80 
   5  -2   1  324.37   59.79 
   2   5   1  197.78   33.70 
  -2  -5   1  264.57   47.00 
  -2  -5   1  224.68   35.80 
  -2  -5   1  265.87   46.20 
  -5   2   1  241.98   33.70 
  -5   2   1  225.88   31.40 
   5  -2   1  343.67   62.69 
   2   5   1  310.67   42.50 
  -2  -5   1  219.08   41.20 
  -2  -5   1  147.39   34.20 
  -2  -5   1  254.37   43.90 
  -2  -5   1  258.37   42.00 
  -2  -5   1  129.49   36.20 
   2   5   1  198.88   24.30 
  -2  -5   1  194.78   30.30 
  -5   2   1  167.88   34.90 
   2   5   1  176.98   35.70 
   2   5   1  237.38   39.90 
   5  -2   1  168.58   24.00 
   5  -2   1  180.98   24.80 
  -5   2   1  212.68   24.10 
   5  -2   1  170.98   33.70 
   5  -2   1  166.88   26.10 
   5  -2   1  151.28   31.40 
   5  -2   1  177.78   47.50 
  -2  -5   1  206.28   35.30 
   5  -2   1  232.98   38.80 
   2   5   1  151.38   30.70 
   5  -2   1  225.78   42.50 
   3   5  -1  448.06   61.99 
  -5   3  -1  190.98   49.70 
   5  -3  -1  331.47   51.29 
   5  -3  -1  345.27   61.29 
   5  -3  -1  464.55   57.49 
  -3  -5  -1  308.07   48.70 
   3   5  -1  235.68   57.29 
   5  -3  -1  336.87   49.99 
   5  -3  -1  393.46   37.50 
  -3  -5  -1  384.96   51.99 
  -3  -5  -1  337.27   53.59 
   3   5  -1  378.26   51.99 
   5  -3  -1  359.36   47.60 
   3   5  -1  366.46   55.39 
  -5   3  -1  430.46   51.89 
  -3  -5  -1  428.16   55.99 
   3   5  -1  398.76   42.80 
   5  -3  -1  406.16   69.79 
  -3  -5  -1  300.87   56.29 
  -3  -5  -1  299.07   48.90 
   3   5  -1  232.98   53.59 
  -3  -5  -1  371.66   57.29 
   3   5  -1  296.67   46.90 
  -3  -5  -1  376.96   61.29 
   3   5  -1  336.67   62.19 
   3   5  -1  357.56   52.79 
  -3  -5  -1  303.97   52.89 
   3   5  -1  386.76   54.39 
   5  -3  -1  325.87   50.79 
  -3  -5  -1  371.26   53.59 
   5  -3  -1  374.06   47.30 
  -5   3  -1  344.17   45.20 
   5  -3  -1  446.36   49.80 
  -5   3  -1  404.46   54.69 
  -5   3  -1  370.36   64.59 
  -5   3  -1  464.15   57.49 
   5  -3  -1  371.16   43.60 
  -3  -5  -1  346.67   40.90 
   3   5  -1  263.87   48.00 
  -5   3  -1  301.07   40.30 
  -5   3  -1  301.07   45.00 
  -5   3  -1  352.76   46.60 
   3   5  -1  376.26   48.70 
   5  -3  -1  363.26   26.80 
  -3  -5  -1  388.46   59.19 
   3   5  -1  312.77   53.89 
   5  -3  -1  382.26   28.60 
   5  -3  -1  351.96   29.50 
   5  -3  -1  284.07   52.99 
   5  -3  -1  337.67   49.40 
   5  -3  -1  311.37   51.29 
   5  -3  -1  323.17   46.90 
   3   5  -1  374.66   52.79 
   3   5  -1  363.96   59.79 
  -3  -5  -1  421.66   58.29 
  -3  -5  -1  337.47   51.49 
  -5   3  -1  448.16   30.70 
  -3  -5  -1  383.96   51.29 
   3   5  -1  425.26   55.69 
  -3  -5  -1  328.97   47.30 
   5  -3  -1  389.16   49.60 
  -5   3  -1  384.86   47.30 
  -3  -5  -1  389.86   63.99 
   3   5  -1  408.96   58.59 
   5  -3  -1  345.87   48.60 
  -5   3  -1  372.96   45.40 
  -5   3  -1  405.26   52.69 
  -3  -5  -1  461.75   64.39 
   3   5  -1  388.06   57.39 
  -3  -5  -1  251.27   36.60 
  -3  -5  -1  359.36   56.29 
   5  -3  -1  378.66   27.30 
   5  -3  -1  347.57   62.89 
  -3  -5  -1  372.36   49.30 
   3   5  -1  440.06   61.29 
  -5   3  -1  372.36   62.69 
   5  -3   1  373.56   63.99 
   5  -3   1  438.36   70.19 
   5  -3   1  379.36   33.40 
  -3  -5   1  400.46   55.49 
   5  -3   1  368.86   46.80 
   5  -3   1  361.96   50.59 
   5  -3   1  338.37   49.40 
   5  -3   1  449.16   55.69 
   3   5   1  283.97   48.10 
   5  -3   1  281.77   47.00 
   5  -3   1  370.86   32.90 
   3   5   1  396.76   54.19 
  -3  -5   1  394.26   63.89 
   3   5   1  370.06   52.39 
  -3  -5   1  330.27   53.79 
  -3  -5   1  438.66   68.69 
  -3  -5   1  394.86   58.89 
   3   5   1  367.36   49.00 
  -3  -5   1  436.06   47.50 
   5  -3   1  347.07   33.90 
  -3  -5   1  491.35   47.90 
  -3  -5   1  355.56   58.39 
   5  -3   1  384.86   52.79 
  -3  -5   1  432.36   53.49 
  -5   3   1  389.76   53.09 
  -3  -5   1  397.76   56.69 
  -5   3   1  247.98   35.90 
   3   5   1  305.37   60.79 
   5  -3   1  355.16   35.20 
   5  -3   1  368.46   44.60 
   3   5   1  294.57   46.80 
   3   5   1  356.36   53.09 
  -5   3   1  324.87   49.50 
   3   5   1  341.97   41.10 
  -3  -5   1  300.07   53.59 
   5  -3   1  345.17   60.69 
   3   5   1  433.96   53.79 
   3   5   1  380.56   53.09 
  -5   3   1  255.97   51.79 
   3   5   1  371.46   51.69 
  -3  -5   1  349.17   59.49 
  -3  -5   1  273.77   38.30 
  -5   3   1  289.87   45.60 
  -5   3   1  316.07   30.20 
   5  -3   1  400.46   44.30 
   3   5   1  313.67   56.09 
   5  -3   1  443.06   57.59 
  -3  -5   1  351.16   54.49 
  -5   3   1  349.17   24.40 
   5  -3   1  284.57   33.10 
  -5   3   1  419.86   63.59 
  -5   3   1  344.67   58.49 
  -5   3   1  366.26   51.09 
  -3  -5   1  342.37   60.19 
   5  -3   1  427.66   73.69 
   3   5   1  372.06   60.89 
  -3  -5   1  357.46   42.40 
   3   5   1  385.56   52.19 
   5  -3   1  312.87   51.99 
  -3  -5   1  428.86   63.49 
   5  -3   1  314.97   53.49 
  -3  -5   1  366.16   57.59 
  -3  -5   1  244.68   50.59 
  -5   3   1  341.67   48.20 
  -5   3   1  272.67   43.60 
   3   5   1  332.97   53.59 
  -3  -5   1  431.96   49.90 
   5  -3   1  327.17   43.30 
   3   5   1  324.17   57.79 
  -3  -5   1  372.36   53.09 
  -3  -5   1  415.06   60.29 
   5  -3   1  390.76   31.00 
   5  -3   1  365.66   69.49 
   5  -3   1  467.75   55.49 
   3   5   1  384.96   40.20 
  -3  -5   1  475.35   57.99 
  -5   3   1  350.96   45.00 
  -5   4  -1  453.15   51.29 
   4   5  -1  413.96   74.39 
   5  -4  -1  444.96   53.89 
  -4  -5  -1  442.76   59.69 
  -4  -5  -1  408.66   58.29 
  -5   4  -1  408.26   47.40 
  -4  -5  -1  343.27   62.09 
  -4  -5  -1  409.46   50.99 
   5  -4  -1  277.07   63.89 
   4   5  -1  521.45   70.49 
  -4  -5  -1  375.06   56.99 
  -4  -5  -1  311.57   57.09 
   5  -4  -1  593.34   61.09 
   4   5  -1  476.35   76.69 
   4   5  -1  464.05   66.29 
  -4  -5  -1  300.07   57.79 
   5  -4  -1  301.27   62.69 
   5  -4  -1  480.25   49.20 
  -5   4  -1  316.57   62.09 
  -4  -5  -1  434.56   61.59 
   4   5  -1  432.46   56.89 
   4   5  -1  450.25   60.09 
   4   5  -1  420.16   62.39 
  -4  -5  -1  450.25   72.19 
   4   5  -1  467.65   58.99 
   4   5  -1  447.86   61.49 
   4   5  -1  349.57   60.49 
   4   5  -1  437.16   55.29 
   5  -4  -1  429.96   54.79 
  -4  -5  -1  462.55   66.19 
   4   5  -1  416.36   67.79 
   5  -4  -1  482.95   63.29 
  -4  -5  -1  337.57   62.69 
   5  -4  -1  457.95   62.49 
  -5   4  -1  512.55   62.29 
  -4  -5  -1  441.56   59.59 
   5  -4  -1  396.16   34.50 
   5  -4  -1  399.26   55.19 
   5  -4  -1  459.65   60.89 
  -4  -5  -1  385.06   52.79 
   5  -4  -1  362.86   44.10 
   5  -4  -1  439.56   44.10 
   4   5  -1  400.16   54.09 
   4   5  -1  475.55   45.90 
   5  -4  -1  465.55   70.59 
  -4  -5  -1  345.27   48.00 
   5  -4  -1  471.25   61.49 
  -4  -5  -1  552.04   68.19 
   4   5  -1  327.27   58.19 
  -5   4  -1  449.66   79.09 
  -5   4  -1  509.75   52.89 
  -4  -5  -1  375.56   68.39 
   4   5  -1  442.56   60.49 
  -4  -5  -1  404.56   57.29 
   5  -4  -1  513.95   42.70 
   5  -4  -1  454.15   57.39 
  -4  -5  -1  370.86   58.49 
   5  -4  -1  501.95   65.29 
  -5   4  -1  497.05   62.39 
  -4  -5  -1  460.75   67.09 
   4   5  -1  408.26   64.09 
   4   5  -1  354.06   55.69 
   4   5  -1  378.26   56.09 
   5  -4  -1  371.96   70.59 
   5  -4  -1  354.86   59.49 
  -5   4  -1  517.55   52.79 
  -5   4  -1  370.26   51.39 
   4   5  -1  488.85   54.49 
   5  -4  -1  555.54   60.89 
  -5   4  -1  466.35   58.09 
  -5   4  -1  357.96   49.60 
  -5   4  -1  439.36   53.49 
  -4  -5   1  351.86   57.99 
   5  -4   1  395.06   35.40 
  -4  -5   1  440.86   49.10 
   5  -4   1  391.86   68.19 
  -4  -5   1  443.36   65.89 
   4   5   1  472.15   60.59 
   5  -4   1  290.27   52.79 
   4   5   1  318.27   53.29 
  -5   4   1  481.85   61.19 
  -4  -5   1  459.75   49.40 
   4   5   1  344.37   66.59 
   4   5   1  472.65   50.19 
  -5   4   1  424.56   48.30 
  -5   4   1  456.15   48.90 
   5  -4   1  352.66   32.60 
   5  -4   1  449.56   34.10 
  -5   4   1  492.95   77.69 
  -4  -5   1  508.65   75.19 
  -4  -5   1  452.75   61.89 
   5  -4   1  424.86   58.29 
   4   5   1  418.26   60.69 
  -4  -5   1  423.76   69.19 
   4   5   1  486.65   68.39 
   5  -4   1  366.06   31.10 
  -5   4   1  392.06   55.49 
  -4  -5   1  447.26   69.29 
   5  -4   1  303.67   50.29 
   4   5   1  406.26   68.09 
  -4  -5   1  532.65   62.09 
  -4  -5   1  529.45   55.59 
  -4  -5   1  626.34   75.39 
  -4  -5   1  500.45   69.59 
  -4  -5   1  364.16   66.19 
   5  -4   1  496.55   52.89 
  -5   4   1  328.87   64.19 
   4   5   1  522.55   61.39 
   5  -4   1  418.36   53.69 
   4   5   1  384.66   58.29 
   5  -4   1  429.76   69.09 
   5  -4   1  433.26   32.90 
   4   5   1  363.66   48.10 
   5  -4   1  397.76   33.90 
   5  -4   1  469.85   59.19 
   5  -4   1  370.46   49.30 
   5  -4   1  513.05   63.39 
  -4  -5   1  405.36   63.19 
   5  -4   1  402.76   34.90 
  -4  -5   1  357.36   64.29 
   4   5   1  359.26   54.49 
  -4  -5   1  476.15   68.59 
  -4  -5   1  409.86   46.30 
  -4  -5   1  383.56   56.79 
  -4  -5   1  416.06   73.39 
   5  -4   1  476.55   59.29 
   5  -4   1  308.77   44.40 
   5  -4   1  363.56   71.69 
   4   5   1  458.25   74.29 
   5  -4   1  531.75   84.89 
  -5   4   1  400.36   55.99 
   4   5   1  496.25   62.59 
   5  -4   1  406.76   57.59 
  -5   4   1  452.15   38.70 
   5  -4   1  478.25   55.89 
   5  -4   1  360.46   61.59 
  -5   4   1  406.36   54.89 
   5  -4   1  439.16   64.49 
   4   5   1  401.16   53.79 
  -5   4   1  350.76   51.19 
   5  -4   1  385.96   32.00 
  -4  -5   1  458.75   62.99 
  -4  -5   1  519.35   54.99 
  -5   4   1  296.67   58.09 
  -4  -5   1  547.05   81.29 
   5  -4   1  470.05   55.69 
   4   5   1  414.56   60.89 
  -4  -5   1  497.75   57.09 
   5  -4   1  375.46   55.99 
  -5   4   1  422.16   58.09 
   4   5   1  437.46   59.79 
   5  -5  -1   -2.40   16.40 
   5   5  -1  -23.00   14.70 
   5  -5  -1    8.30   10.50 
   5   5  -1   -1.50   14.10 
   5  -5  -1   -1.20   12.70 
  -5   5  -1   -7.00    9.40 
   5  -5  -1  -12.00   12.70 
  -5  -5  -1  -18.10   18.30 
  -5   5  -1   -5.00   14.90 
  -5   5  -1    5.40   11.80 
   5   5  -1   -6.70   13.10 
  -5  -5  -1  -18.30   14.60 
   5  -5  -1   19.50   19.60 
   5   5  -1    0.90   14.80 
  -5   5  -1    3.70   18.10 
  -5   5  -1  -10.80   15.20 
   5  -5  -1   -2.80   23.60 
  -5  -5  -1   29.60   19.10 
   5   5  -1    2.60   16.80 
  -5  -5  -1   -1.20   16.20 
  -5   5  -1   -1.50   10.30 
   5  -5  -1   12.60   21.70 
  -5   5  -1    9.40   13.50 
  -5  -5  -1    0.20   18.10 
  -5  -5  -1    3.00    6.30 
  -5  -5  -1    3.60   19.20 
   5   5  -1    1.60   16.20 
   5   5  -1   16.60   20.80 
   5  -5  -1    4.00   14.90 
   5   5  -1   12.90   19.40 
   5  -5  -1   19.80   15.50 
   5   5  -1   25.50   27.80 
   5  -5  -1   34.20   17.30 
   5   5  -1   -0.40   24.80 
   5  -5  -1   -4.70   10.70 
  -5  -5  -1   18.40   23.00 
   5  -5  -1   10.30   13.70 
   5  -5  -1  -25.70   17.70 
  -5  -5  -1    0.70   16.90 
   5   5  -1   -0.10   14.40 
  -5  -5  -1    3.30   19.60 
   5   5  -1   12.50   21.40 
   5  -5  -1    7.00   23.90 
  -5   5  -1   -8.80   24.50 
  -5   5  -1   -1.00   10.40 
  -5  -5  -1    6.00   22.80 
  -5  -5  -1   15.70   17.80 
  -5  -5  -1    9.40   21.60 
  -5   5  -1   -4.80   13.10 
  -5  -5  -1    1.80   17.80 
   5  -5  -1    5.30   17.50 
   5   5  -1    8.10   16.30 
  -5  -5  -1   12.10   17.60 
   5  -5  -1    1.10   14.50 
  -5  -5  -1   14.00   25.60 
   5  -5  -1    4.20   20.10 
  -5  -5  -1    1.90   21.50 
  -5   5  -1    7.30   12.90 
  -5  -5  -1    9.90   16.30 
   5  -5  -1    0.10   16.50 
  -5   5  -1  -19.10   10.30 
   5  -5  -1    7.70   12.90 
   5   5  -1   -8.10   13.40 
  -5   5  -1   -4.90    9.30 
  -5  -5  -1   -3.20   14.80 
   5   5  -1   -3.90   17.60 
   5   5  -1   -5.50   14.00 
  -5   5  -1    7.00   20.90 
   5   5  -1   27.60   27.70 
   5   5  -1   30.00   21.90 
  -5  -5   1  -23.20   18.80 
   5   5   1   -5.60   21.60 
   5  -5   1    7.50   16.50 
   5  -5   1    8.90   16.50 
  -5   5   1   10.60   15.50 
  -5   5   1    3.00   10.90 
  -5  -5   1   -8.00   14.00 
  -5  -5   1   -0.60   11.60 
  -5   5   1    3.30   16.20 
  -5   5   1   34.40   21.30 
  -5  -5   1   -1.50   16.60 
  -5  -5   1   -1.70   16.00 
   5  -5   1   10.00   19.20 
  -5   5   1    5.00   14.00 
  -5   5   1   -0.10   19.00 
   5   5   1   -4.10   15.60 
  -5  -5   1  -13.00   17.00 
   5   5   1  -20.10   12.40 
  -5   5   1   -9.70   14.80 
   5  -5   1   -2.90   11.70 
  -5  -5   1   -5.00   18.40 
   5   5   1   27.10   23.10 
  -5   5   1    3.70    9.70 
   5  -5   1   -4.40   22.50 
  -5  -5   1   36.30   18.80 
   5   5   1   -5.80   12.50 
   5  -5   1   -1.00   18.40 
  -5  -5   1   -5.50   15.50 
  -5  -5   1    5.50   27.80 
   5   5   1  -20.10   13.90 
   5  -5   1    2.60   15.30 
   5  -5   1   12.40   15.70 
   5  -5   1    2.50   16.30 
  -5  -5   1   -3.10   12.00 
  -5  -5   1  -13.50   13.00 
  -5   5   1   18.10   26.60 
  -5  -5   1   43.80   29.00 
   5   5   1    7.60   17.90 
   5  -5   1   14.80   17.20 
  -5  -5   1   12.60   21.80 
  -5  -5   1   13.20   15.40 
  -5  -5   1   -6.70   22.70 
   5   5   1  -25.60   22.00 
  -5  -5   1  -18.60   12.90 
   5  -5   1  -30.10   18.70 
   5   5   1  -19.70   19.50 
   5   5   1   -8.40   17.50 
   5   5   1   -1.80   14.00 
  -5  -5   1    0.00   14.90 
  -5  -5   1   17.10   15.40 
  -5   5   1    8.70   10.00 
   5   5   1   18.80   22.10 
   5   5   1    1.20   16.20 
   5  -5   1   44.30   20.20 
   5  -5   1  -24.00   22.30 
   5  -5   1  -24.20   14.20 
  -5  -5   1   -6.30   19.60 
   5  -5   1   18.60   22.00 
   5  -5   1   -1.40   14.70 
  -5  -5   1  -12.20   16.80 
  -5  -5   1   -7.60   16.00 
   5   5   1    5.30   14.20 
  -5   5   1    5.10   12.60 
   5  -5   1   -0.70   15.20 
   5  -5   1   -8.90   22.30 
  -5   5   1    1.40   15.80 
   5  -5   1    2.70   12.00 
   5   5   1   10.50   14.50 
  -5  -5   1    1.30   12.60 
  -5  -5   1   -2.50   16.50 
   5  -5   1  -33.40   10.40 
  -5   5   1    6.50   16.40 
   5   5   1    5.00   16.70 
  -6  -5  -1  404.46   65.29 
   5  -6  -1  256.77   51.79 
  -6  -5  -1  411.76   61.99 
   6   5  -1  546.75   89.39 
   6   5  -1  370.76   55.49 
   6   5  -1  334.57   72.69 
  -5   6  -1  352.76   43.10 
  -6  -5  -1  433.66   77.59 
  -5   6  -1  399.06   56.19 
  -5   6  -1  407.36   63.19 
  -6  -5  -1  422.46   73.89 
  -6  -5  -1  329.17   61.89 
  -5   6  -1  381.56   61.39 
   6   5  -1  331.67   58.19 
   6   5  -1  461.95   71.89 
  -5   6  -1  593.34   75.19 
   5  -6  -1  351.06   58.39 
  -5   6  -1  289.67   49.00 
   6   5  -1  384.96   62.59 
  -5   6  -1  382.46   46.30 
  -6  -5  -1  299.17   53.69 
  -5   6  -1  382.26   77.89 
   6   5  -1  415.26   73.89 
  -6  -5  -1  292.37   55.79 
   5  -6  -1  331.77   57.69 
  -6  -5  -1  419.66   60.69 
   6   5  -1  473.85   63.49 
  -5   6  -1  364.66   71.59 
   5  -6  -1  352.76   53.99 
   6   5  -1  363.96   56.09 
  -6  -5  -1  392.96   68.79 
  -6  -5  -1  451.95   71.19 
   5  -6  -1  485.25   70.89 
  -6  -5  -1  378.86   60.89 
   5  -6  -1  429.16   71.99 
   5  -6  -1  381.16   73.69 
   5  -6  -1  494.35   82.89 
  -5   6  -1  470.65   69.19 
  -5   6  -1  239.88   44.90 
   6   5  -1  407.96   59.59 
  -6  -5  -1  315.47   55.69 
   6   5  -1  426.86   60.49 
  -6  -5  -1  344.77   67.49 
   5  -6  -1  362.46   52.09 
   5  -6  -1  427.96   51.69 
   5  -6  -1  459.95   63.89 
   6   5  -1  243.78   55.89 
   6   5  -1  366.66   64.39 
  -5   6  -1  468.05   64.09 
  -5   6  -1  379.86   54.29 
  -6  -5  -1  352.86   65.19 
   5  -6  -1  510.25   60.99 
   5  -6  -1  359.46   50.69 
  -5   6  -1  398.66   51.19 
   5  -6  -1  334.47   60.29 
  -6  -5  -1  285.97   63.79 
  -6  -5  -1  292.77   67.09 
   6   5  -1  368.56   77.79 
   5  -6  -1  422.56   56.69 
   5  -6  -1  378.26   80.29 
   5  -6  -1  501.05   61.49 
   6   5  -1  416.86   70.09 
   5  -6  -1  476.65   60.49 
   6   5  -1  491.35   68.59 
  -6  -5  -1  207.78   59.99 
   6   5  -1  471.95   65.79 
   6   5  -1  292.37   51.19 
   6   5   1  310.17   60.69 
  -6  -5   1  509.45   54.49 
   6   5   1  360.76   51.79 
   5  -6   1  282.97   52.99 
   6   5   1  389.06   64.69 
   5  -6   1  442.56   80.59 
  -5   6   1  310.87   52.19 
  -5   6   1  383.06   61.89 
   5  -6   1  486.25   91.39 
  -6  -5   1  469.05   50.59 
  -6  -5   1  426.56   52.99 
  -5   6   1  355.66   42.70 
   6   5   1  379.16   58.89 
   5  -6   1  470.15   55.29 
   5  -6   1  455.65   61.19 
   5  -6   1  345.77   56.39 
  -6  -5   1  490.25   82.39 
   5  -6   1  346.17   51.59 
   6   5   1  450.65   61.59 
  -5   6   1  309.37   47.10 
   6   5   1  353.36   55.49 
   5  -6   1  293.77   52.09 
  -6  -5   1  481.15   80.89 
  -6  -5   1  427.06   51.79 
   6   5   1  368.36   65.29 
  -5   6   1  350.16   43.40 
   5  -6   1  327.77   58.49 
   6   5   1  297.57   68.39 
  -6  -5   1  381.36   69.19 
  -5   6   1  381.66   58.39 
   6   5   1  557.64   74.49 
   5  -6   1  454.55   59.49 
   5  -6   1  375.26   62.89 
   5  -6   1  336.67   57.29 
  -6  -5   1  298.97   69.09 
   6   5   1  445.96   65.99 
  -6  -5   1  517.75   73.79 
   6   5   1  412.36   55.99 
   6   5   1  330.87   70.09 
  -5   6   1  393.56   60.29 
  -6  -5   1  400.36   66.89 
  -6  -5   1  349.67   72.39 
   6   5   1  419.66   76.49 
   5  -6   1  302.77   53.59 
  -5   6   1  428.46   76.79 
  -5   6   1  353.26   57.99 
  -6  -5   1  427.86   68.79 
  -6  -5   1  403.76   67.89 
   5  -6   1  354.86   61.39 
   5  -6   1  290.37   61.69 
  -6  -5   1  373.66   68.79 
   5  -6   1  346.97   80.39 
  -6  -5   1  384.36   68.19 
  -5   6   1  258.97   64.69 
   6   5   1  452.45   80.49 
  -6  -5   1  409.66   58.79 
  -5   6   1  378.56   60.19 
   5  -6   1  428.26   51.59 
  -6  -5   1  381.26   70.69 
   5  -6   1  447.76   72.09 
   6   5   1  284.47   50.39 
  -6  -5   1  371.26   77.69 
  -5   6   1  306.27   53.99 
  -5   6   1  315.37   56.79 
  -6  -5   1  431.46   65.39 
   6   5   1  278.27   54.49 
  -6  -5   1  403.86   73.79 
   5  -6   1  309.87   58.49 
   5  -6   1  248.18   56.29 
  -6  -5   1  457.45   73.69 
   6   5   1  474.55   73.09 
  -6  -5   1  397.26   60.69 
   4  -6  -1 1120.29  114.99 
  -6  -4  -1  975.40   75.69 
  -6  -4  -1  969.90   73.69 
   4  -6  -1  890.81  100.19 
   6   4  -1  975.90  104.69 
   6   4  -1 1006.90   85.29 
   6   4  -1 1100.59  108.19 
   6   4  -1 1121.49  119.99 
  -6  -4  -1  887.21  115.09 
   4  -6  -1  929.81  100.79 
   6   4  -1 1137.59   92.79 
   4  -6  -1  868.01   94.59 
  -6  -4  -1 1040.10  120.09 
  -4   6  -1 1014.40  107.19 
   6   4  -1 1159.68   94.79 
  -4   6  -1  954.90   81.59 
  -6  -4  -1 1095.99   91.49 
  -6  -4  -1 1150.18  122.19 
  -6  -4  -1 1082.09  107.29 
   4  -6  -1  892.31   90.79 
  -4   6  -1 1046.80  113.99 
  -4   6  -1  845.52   81.99 
   4  -6  -1  939.01   80.29 
  -4   6  -1 1014.50  104.49 
   4  -6  -1  959.90   81.39 
   4  -6  -1 1026.10  121.29 
  -4   6  -1  927.51   70.39 
   4  -6  -1 1044.90   80.09 
  -6  -4  -1 1112.99  127.19 
  -6  -4  -1 1017.00   86.89 
   4  -6  -1  985.00  102.39 
  -6  -4  -1  817.62  106.39 
  -6  -4  -1  924.51   86.49 
  -4   6  -1  976.60   80.29 
  -6  -4  -1 1092.39  112.89 
   6   4  -1 1174.68  133.99 
  -4   6  -1  987.80   83.59 
  -6  -4  -1 1187.78  114.19 
   6   4  -1  968.20   99.79 
  -6  -4  -1  995.10  100.39 
  -4   6  -1 1063.69  117.89 
   6   4  -1 1006.00   80.59 
   4  -6  -1  863.61   81.99 
   4  -6  -1  921.81  112.39 
  -6  -4  -1 1008.50  117.59 
  -4   6  -1  890.01  120.59 
  -6  -4  -1 1083.79  110.39 
   6   4  -1  901.51  104.49 
   6   4  -1 1036.20  127.29 
   6   4  -1  872.21   81.49 
   4  -6  -1  955.80   73.79 
  -4   6  -1  964.90   86.29 
   6   4  -1 1188.28   90.89 
  -6  -4  -1 1006.70  114.79 
   4  -6  -1  879.61   84.49 
   6   4  -1 1125.19   89.79 
  -6  -4  -1  983.70   98.29 
  -6  -4  -1  938.51  115.99 
   6   4  -1 1094.49   98.59 
   4  -6  -1  956.20   83.49 
  -6  -4  -1 1033.80  125.59 
  -4   6  -1  853.21   96.89 
   6   4  -1 1208.78  101.19 
  -6  -4  -1  946.31   72.79 
   4  -6  -1  924.11  125.09 
   6   4  -1  874.61   97.19 
   4  -6  -1  955.00   97.89 
   6   4  -1  937.41  109.29 
   4  -6  -1  849.61  101.29 
  -6  -4   1  939.81   77.29 
   6   4   1  753.52   90.39 
   4  -6   1  965.50   98.39 
  -4   6   1  842.62  115.19 
   6   4   1  966.60  102.39 
   4  -6   1 1077.39   90.39 
  -6  -4   1  920.51   78.19 
  -6  -4   1  930.01  117.49 
  -4   6   1  913.51  102.69 
   4  -6   1 1097.59  105.99 
   4  -6   1  985.30  123.89 
   4  -6   1  900.11   75.19 
  -4   6   1  977.50   88.09 
  -4   6   1  927.01  100.69 
  -4   6   1  892.51   96.99 
   6   4   1  760.02  106.19 
  -6  -4   1 1000.20  113.39 
  -6  -4   1 1011.60   82.89 
  -6  -4   1  999.60  113.89 
  -6  -4   1  926.81  105.29 
  -6  -4   1  973.20  107.19 
   4  -6   1 1248.08  142.19 
   4  -6   1  922.91  100.39 
   6   4   1  995.20  109.39 
   6   4   1 1030.40  121.19 
  -6  -4   1  894.11  106.49 
  -4   6   1  921.61  113.09 
   4  -6   1 1069.49   78.99 
  -4   6   1  974.60  106.49 
   6   4   1 1031.30  114.39 
  -6  -4   1 1023.20  114.69 
   4  -6   1 1024.30   85.79 
   4  -6   1  940.91  105.39 
  -4   6   1  989.50   90.29 
   6   4   1 1206.58  127.39 
   4  -6   1 1162.98   85.39 
   6   4   1 1004.50  111.49 
   4  -6   1  829.42   96.09 
   6   4   1  956.40  106.79 
  -4   6   1 1036.10   79.49 
   6   4   1  822.12  100.89 
   6   4   1  965.50   80.19 
   6   4   1  929.01   81.89 
  -4   6   1  942.21   69.39 
  -6  -4   1 1157.08   94.79 
  -6  -4   1  897.21  122.09 
  -4   6   1 1047.10   70.39 
   4  -6   1 1002.10  107.49 
   6   4   1  914.81   98.79 
  -6  -4   1 1019.50  103.89 
   4  -6   1  903.21   99.09 
   4  -6   1 1040.50  112.19 
   4  -6   1 1095.09   83.29 
  -6  -4   1  796.62  108.89 
   4  -6   1  974.40   82.59 
  -6  -4   1 1061.69  117.79 
   6   4   1  989.40  105.69 
   6   4   1  844.52   96.39 
  -6  -4   1  807.72  103.79 
  -4   6   1  902.91   96.69 
   4  -6   1 1100.49   95.69 
   6   4   1  854.01   81.79 
   4  -6   1 1003.20  103.29 
  -6  -4   1  874.61  111.49 
   6   4   1  958.80  120.29 
  -6  -4   1 1033.00  113.59 
   4  -6   1  974.60  108.49 
  -6  -4   1  957.00   82.39 
  -6  -4   1 1029.90  111.89 
   3  -6  -1   41.80   17.20 
   3  -6  -1   18.40   11.20 
   6   3  -1   -8.30   20.40 
  -3   6  -1   32.40   17.00 
  -3   6  -1   49.99   19.80 
  -6  -3  -1   27.10   21.20 
  -6  -3  -1   -5.70   13.60 
   3  -6  -1   19.20   16.20 
   6   3  -1    7.30   14.40 
   6   3  -1   23.10   20.70 
   3  -6  -1   30.90   23.10 
   6   3  -1   13.90   19.70 
   6   3  -1   28.00   23.50 
   3  -6  -1   30.20   23.50 
   6   3  -1   41.50   22.60 
  -6  -3  -1   11.70   19.20 
   6   3  -1    9.40   23.70 
  -3   6  -1   17.00    9.60 
  -3   6  -1    7.00   18.10 
  -6  -3  -1   60.09   30.20 
   3  -6  -1   15.60   17.30 
  -6  -3  -1   27.40   13.90 
   3  -6  -1   23.80   18.30 
  -3   6  -1   46.30   26.70 
   6   3  -1   20.40   20.40 
  -3   6  -1   25.70   15.00 
   6   3  -1   31.90   29.80 
   3  -6  -1   21.60   16.50 
  -6  -3  -1   38.50   26.90 
   6   3  -1   35.00   20.00 
   3  -6  -1   14.40   14.90 
   3  -6  -1   48.90   21.50 
  -6  -3  -1   37.60   15.70 
   6   3  -1   19.50   15.70 
  -6  -3  -1   44.90   28.70 
   3  -6  -1   28.80   18.20 
   6   3  -1   -2.80   17.00 
  -6  -3  -1   16.70   18.90 
  -3   6  -1   45.90   31.30 
   3  -6  -1    7.10   13.70 
  -6  -3  -1   -2.10   20.00 
  -6  -3  -1   30.00   18.50 
   6   3  -1   42.10   22.70 
   6   3  -1   20.20   19.00 
   6   3  -1   12.80   15.60 
  -6  -3  -1   20.00   17.60 
  -3   6  -1   25.80   16.40 
  -3   6  -1    7.00    7.90 
   6   3  -1   32.60   21.80 
  -6  -3  -1   22.50   21.00 
   3  -6  -1   23.40   14.60 
  -3   6  -1   27.20   21.30 
  -3   6  -1    7.10   15.50 
   3  -6  -1   30.10   15.70 
  -6  -3  -1   43.80   26.90 
   3  -6  -1   28.10   20.80 
   6   3  -1   -2.70   14.70 
  -6  -3  -1   27.70   18.60 
  -6  -3  -1   -1.00   14.90 
   6   3  -1   -4.70   18.40 
  -3   6  -1   23.30   18.50 
  -6  -3  -1   11.80   16.70 
   3  -6  -1   24.80   19.20 
  -6  -3  -1   18.80   22.70 
  -6  -3  -1   89.19   24.60 
   3  -6  -1   49.60   26.90 
  -6  -3  -1    2.90   23.50 
  -6  -3   1   19.40   23.10 
   3  -6   1   27.60   13.20 
   3  -6   1   42.40   21.00 
  -6  -3   1   27.00   24.50 
   6   3   1   22.10   20.80 
  -3   6   1   30.50   18.40 
   3  -6   1   17.00   17.90 
   3  -6   1   30.80   11.50 
  -6  -3   1    0.60   23.40 
   3  -6   1    0.70   14.10 
   3  -6   1   21.80   12.30 
   6   3   1   30.80   24.00 
   3  -6   1    2.40   18.10 
   3  -6   1   27.80   24.30 
   3  -6   1   11.00   17.40 
   3  -6   1   15.90   17.50 
  -6  -3   1   39.40   23.40 
  -6  -3   1   61.69   21.70 
  -6  -3   1   59.29   29.60 
   3  -6   1   18.40   12.30 
   3  -6   1   13.90   11.80 
  -6  -3   1   -1.00   18.00 
  -6  -3   1   35.80   17.00 
   6   3   1   35.40   18.70 
  -3   6   1    2.00   18.60 
   3  -6   1   10.50   16.30 
  -6  -3   1   36.80   23.50 
  -6  -3   1   37.40   22.10 
   3  -6   1   26.50   12.20 
  -3   6   1   31.40   17.60 
  -3   6   1   16.80   21.50 
  -6  -3   1   28.80   24.80 
   6   3   1   26.80   15.60 
   3  -6   1   28.10   19.80 
   6   3   1   14.70   17.10 
   6   3   1   62.69   30.20 
  -3   6   1   14.80   19.50 
  -6  -3   1   18.10   14.80 
   6   3   1   22.00   16.90 
   6   3   1   17.40   17.90 
   3  -6   1   21.20   16.40 
   6   3   1   51.59   16.70 
  -6  -3   1   13.20   21.50 
  -3   6   1   -2.40   15.40 
   6   3   1    3.40   14.10 
  -6  -3   1   40.70   25.50 
   6   3   1   15.00   22.10 
   6   3   1   31.30   18.90 
  -6  -3   1   43.90   22.30 
   6   3   1  179.58   48.20 
   3  -6   1    7.00   22.10 
  -3   6   1   11.50   15.00 
   3  -6   1   20.50   20.30 
  -3   6   1   14.00   10.90 
  -6  -3   1   11.80   24.90 
   3  -6   1   40.30   25.20 
   3  -6   1   -1.30   17.30 
   3  -6   1   19.70   19.40 
  -3   6   1   19.40   25.20 
   3  -6   1   14.00   15.20 
  -6  -3   1   24.00   22.30 
   6   3   1   16.20   18.60 
   6   3   1    3.60   20.90 
  -3   6   1   23.40   17.60 
   3  -6   1   13.20   11.90 
  -3   6   1   20.90   17.30 
   6   3   1   -5.00   15.40 
   6   3   1  117.09   36.60 
   3  -6   1  -22.10   18.70 
   3  -6   1   -6.90   11.20 
  -6  -3   1   20.90   19.80 
   6   3   1   36.20   29.00 
   3  -6   1   16.80   16.40 
   6   2  -1 2157.08  161.78 
   6   2  -1 2488.45  165.18 
  -6  -2  -1 2290.17  167.08 
  -6  -2  -1 2516.15  185.48 
  -6  -2  -1 2556.84  166.78 
   6   2  -1 2334.67  171.28 
  -2   6  -1 2352.66  164.58 
   2  -6  -1 2290.97  146.09 
  -2   6  -1 2276.77  154.48 
  -6  -2  -1 2675.33  181.48 
  -2   6  -1 2116.59  158.78 
   6   2  -1 2127.19  174.88 
  -6  -2  -1 2415.16  169.18 
  -6  -2  -1 2275.27  155.58 
  -6  -2  -1 2327.27  155.78 
  -2   6  -1 2275.87  169.68 
   6   2  -1 2227.48  166.98 
  -2   6  -1 2163.08  167.08 
   2  -6  -1 2079.39  170.28 
  -2   6  -1 2201.18  150.28 
   2  -6  -1 2386.36  162.68 
   2  -6  -1 2277.17  145.79 
   2  -6  -1 2317.77  164.48 
  -2   6  -1 2261.17  141.39 
   2  -6  -1 2408.06  172.28 
  -6  -2  -1 2252.97  165.08 
   6   2  -1 2449.05  166.38 
  -2   6  -1 2206.38  159.88 
   6   2  -1 2224.68  162.18 
   6   2  -1 2271.17  167.78 
   6   2  -1 2302.97  168.48 
   6   2  -1 2302.67  192.88 
   2  -6  -1 2355.16  159.38 
  -2   6  -1 2374.56  156.88 
   2  -6  -1 2294.67  169.28 
  -2   6  -1 2238.08  150.68 
  -2   6  -1 2408.06  160.48 
  -6  -2  -1 2327.37  166.18 
   2  -6  -1 2242.68  157.98 
  -6  -2  -1 2676.63  190.68 
  -6  -2  -1 2303.97  173.98 
   2  -6  -1 2336.77  172.18 
   6   2  -1 2442.76  171.48 
   2  -6  -1 2268.37  149.09 
  -6  -2  -1 2234.98  178.08 
   2  -6  -1 2215.38  165.18 
  -2   6  -1 2307.77  163.58 
  -6  -2  -1 2432.76  181.58 
   2  -6  -1 2109.09  174.28 
   2  -6  -1 2204.08  162.28 
   6   2  -1 2500.45  171.58 
   2  -6  -1 2326.47  149.59 
   6   2  -1 2376.46  174.78
[truncated: 3,370,158 more chars]
