# Supplementary material for: M6O4(OH)4 of M = Sn, Pb: Single Crystal Growth and Crystal Structure Determinations Far Away from Routine
Source: MDPI journal article supplement (doi:10.3390/cryst13050739), 2023-04-27
Supplement: s1 [file s1 › crystals-2348544-supplementary/Sn6O4(OH) structure model_III.cif]

 
data_HR514_0m 
  
_audit_creation_method            'SHELXL-2014/7' 
_shelx_SHELXL_version_number      '2014/7' 
_chemical_name_systematic         ? 
_chemical_name_common             ? 
_chemical_melting_point           ? 
_chemical_formula_moiety          ? 
_chemical_formula_sum 
 'H4 O8 Sn6' 
_chemical_formula_weight          844.17 
  
loop_ 
 _atom_type_symbol 
 _atom_type_description 
 _atom_type_scat_dispersion_real 
 _atom_type_scat_dispersion_imag 
 _atom_type_scat_source 
 'O'  'O'   0.0106   0.0060 
 'International Tables Vol C Tables 4.2.6.8 and 6.1.1.4' 
 'H'  'H'   0.0000   0.0000 
 'International Tables Vol C Tables 4.2.6.8 and 6.1.1.4' 
 'Sn'  'Sn'  -0.6537   1.4246 
 'International Tables Vol C Tables 4.2.6.8 and 6.1.1.4' 
  
_space_group_crystal_system       tetragonal 
_space_group_IT_number            114 
_space_group_name_H-M_alt         'P -4 21 c' 
_space_group_name_Hall            'P -4 2n' 
  
_shelx_space_group_comment 
; 
The symmetry employed for this shelxl refinement is uniquely defined 
by the following loop, which should always be used as a source of 
symmetry information in preference to the above space-group names. 
They are only intended as comments. 
; 
  
loop_ 
 _space_group_symop_operation_xyz 
 'x, y, z' 
 '-x, -y, z' 
 'y, -x, -z' 
 '-y, x, -z' 
 '-x+1/2, y+1/2, -z+1/2' 
 'x+1/2, -y+1/2, -z+1/2' 
 '-y+1/2, -x+1/2, z+1/2' 
 'y+1/2, x+1/2, z+1/2' 
  
_cell_length_a                    7.8788(1) 
_cell_length_b                    7.8788(1) 
_cell_length_c                    9.0582(2) 
_cell_angle_alpha                 90 
_cell_angle_beta                  90 
_cell_angle_gamma                 90 
_cell_volume                      562.292(19) 
_cell_formula_units_Z             2 
_cell_measurement_temperature     100(2) 
_cell_measurement_reflns_used     9976 
_cell_measurement_theta_min       3.43 
_cell_measurement_theta_max       49.95 
  
_exptl_crystal_description        bloc 
_exptl_crystal_colour             colourless 
_exptl_crystal_density_meas       ? 
_exptl_crystal_density_method     ? 
_exptl_crystal_density_diffrn     4.986 
_exptl_crystal_F_000              736 
_exptl_transmission_factor_min    ? 
_exptl_transmission_factor_max    ? 
_exptl_crystal_size_max           0.075 
_exptl_crystal_size_mid           0.073 
_exptl_crystal_size_min           0.073 
_exptl_absorpt_coefficient_mu     13.133 
_shelx_estimated_absorpt_T_min    0.439 
_shelx_estimated_absorpt_T_max    0.447 
_exptl_absorpt_correction_type    multi-scan 
_exptl_absorpt_correction_T_min   0.414
_exptl_absorpt_correction_T_max   0.545 
_exptl_absorpt_process_details    'Bruker SADABS' 
_exptl_absorpt_special_details    ? 
_diffrn_ambient_temperature       100(2) 
_diffrn_radiation_wavelength      0.71073 
_diffrn_radiation_type            MoK\a 
_diffrn_source                    ? 
_diffrn_measurement_device_type   'Bruker APEX-II CCD' 
_diffrn_measurement_method        '\f and \w scans' 
_diffrn_detector_area_resol_mean  ? 
_diffrn_reflns_number             53360 
_diffrn_reflns_av_unetI/netI      0.0122 
_diffrn_reflns_av_R_equivalents   0.0600 
_diffrn_reflns_limit_h_min        -12 
_diffrn_reflns_limit_h_max        12 
_diffrn_reflns_limit_k_min        -12 
_diffrn_reflns_limit_k_max        12 
_diffrn_reflns_limit_l_min        -14 
_diffrn_reflns_limit_l_max        14 
_diffrn_reflns_theta_min          3.657 
_diffrn_reflns_theta_max          34.963 
_diffrn_reflns_theta_full         25.242 
_diffrn_measured_fraction_theta_max   0.999 
_diffrn_measured_fraction_theta_full  0.997 
_diffrn_reflns_Laue_measured_fraction_max    0.999 
_diffrn_reflns_Laue_measured_fraction_full   0.997 
_diffrn_reflns_point_group_measured_fraction_max   0.999 
_diffrn_reflns_point_group_measured_fraction_full  0.998 
_reflns_number_total              1242 
_reflns_number_gt                 1221 
_reflns_threshold_expression      'I > 2\s(I)' 
_reflns_Friedel_coverage          0.715 
_reflns_Friedel_fraction_max      1.000 
_reflns_Friedel_fraction_full     1.000 
  
_reflns_special_details 
; 
 Reflections were merged by SHELXL according to the crystal 
 class for the calculation of statistics and refinement. 
  
 _reflns_Friedel_fraction is defined as the number of unique 
 Friedel pairs measured divided by the number that would be 
 possible theoretically, ignoring centric projections and 
 systematic absences. 
; 
  
_computing_data_collection        'Bruker APEX2' 
_computing_cell_refinement        'Bruker SAINT' 
_computing_data_reduction         'Bruker SAINT' 
_computing_structure_solution     'SHELXS-97 (Sheldrick, 2008)' 
_computing_structure_refinement 'SHELXL-2014/7 (Sheldrick, 2014)' 
_computing_molecular_graphics     'Bruker SHELXTL' 
_computing_publication_material   'Bruker SHELXTL' 
_refine_special_details           ? 
_refine_ls_structure_factor_coef  Fsqd 
_refine_ls_matrix_type            full 
_refine_ls_weighting_scheme       calc 
_refine_ls_weighting_details 
'w=1/[\s^2^(Fo^2^)+0.8625P] where P=(Fo^2^+2Fc^2^)/3' 
_atom_sites_solution_primary      direct 
_atom_sites_solution_secondary    ? 
_atom_sites_solution_hydrogens    difmap 
_refine_ls_hydrogen_treatment     refU 
_refine_ls_extinction_method      'SHELXL-2014/7 (Sheldrick 2014' 
_refine_ls_extinction_coef        0.00271(19) 
_refine_ls_extinction_expression 
 'Fc^*^=kFc[1+0.001xFc^2^\l^3^/sin(2\q)]^-1/4^' 
_refine_ls_abs_structure_details 
; 
 Flack x determined using 495 quotients [(I+)-(I-)]/[(I+)+(I-)] 
 (Parsons, Flack and Wagner, Acta Cryst. B69 (2013) 249-259). 
; 
_refine_ls_abs_structure_Flack    -0.01(2) 
_chemical_absolute_configuration  ? 
_refine_ls_number_reflns          1242 
_refine_ls_number_parameters      35 
_refine_ls_number_restraints      0 
_refine_ls_R_factor_all           0.0133 
_refine_ls_R_factor_gt            0.0127 
_refine_ls_wR_factor_ref          0.0278 
_refine_ls_wR_factor_gt           0.0277 
_refine_ls_goodness_of_fit_ref    1.332 
_refine_ls_restrained_S_all       1.332 
_refine_ls_shift/su_max           0.000 
_refine_ls_shift/su_mean          0.000 
  
loop_ 
 _atom_site_label 
 _atom_site_type_symbol 
 _atom_site_fract_x 
 _atom_site_fract_y 
 _atom_site_fract_z 
 _atom_site_U_iso_or_equiv 
 _atom_site_adp_type 
 _atom_site_occupancy 
 _atom_site_site_symmetry_order 
 _atom_site_calc_flag 
 _atom_site_refinement_flags_posn 
 _atom_site_refinement_flags_adp 
 _atom_site_refinement_flags_occupancy 
 _atom_site_disorder_assembly 
 _atom_site_disorder_group 
Sn1 Sn 0.12338(2) 0.29290(2) 0.00224(4) 0.00929(5) Uani 1 1 d . . . . . 
Sn2 Sn 0.0000 0.0000 0.27680(2) 0.00843(6) Uani 1 2 d S T P . . 
O1 O 0.2492(3) 0.1044(3) 0.1681(3) 0.0102(4) Uani 1 1 d . . . . . 
H1 H 0.3254 0.1536 0.2389 0.032(14) Uiso 1 1 d R . . . . 
O2 O -0.0768(3) 0.1844(3) 0.1209(2) 0.0077(4) Uani 1 1 d . . . . . 
  
loop_ 
 _atom_site_aniso_label 
 _atom_site_aniso_U_11 
 _atom_site_aniso_U_22 
 _atom_site_aniso_U_33 
 _atom_site_aniso_U_23 
 _atom_site_aniso_U_13 
 _atom_site_aniso_U_12 
Sn1 0.01065(8) 0.00638(8) 0.01085(8) -0.00102(13) 0.00325(12) -0.00205(5) 
Sn2 0.0116(2) 0.00851(19) 0.00515(9) 0.000 0.000 0.0016(2) 
O1 0.0097(10) 0.0112(10) 0.0097(9) -0.0021(8) -0.0019(8) -0.0022(8) 
O2 0.0074(9) 0.0081(10) 0.0077(8) -0.0006(7) 0.0004(7) 0.0002(7) 
  
_geom_special_details 
; 
 All esds (except the esd in the dihedral angle between two l.s. planes) 
 are estimated using the full covariance matrix.  The cell esds are taken 
 into account individually in the estimation of esds in distances, angles 
 and torsion angles; correlations between esds in cell parameters are only 
 used when they are defined by crystal symmetry.  An approximate (isotropic) 
 treatment of cell esds is used for estimating esds involving l.s. planes. 
; 
  
loop_ 
 _geom_bond_atom_site_label_1 
 _geom_bond_atom_site_label_2 
 _geom_bond_distance 
 _geom_bond_site_symmetry_2 
 _geom_bond_publ_flag 
Sn1 O2 2.091(2) 3 ? 
Sn1 O2 2.091(2) . ? 
Sn1 O1 2.334(2) . ? 
Sn1 O1 2.392(2) 4 ? 
Sn2 O2 2.115(2) . ? 
Sn2 O2 2.115(2) 2 ? 
Sn2 O1 2.346(3) . ? 
Sn2 O1 2.346(3) 2 ? 
O1 Sn1 2.392(2) 3 ? 
O1 H1 0.9600 . ? 
O2 Sn1 2.091(2) 4 ? 
  
loop_ 
 _geom_angle_atom_site_label_1 
 _geom_angle_atom_site_label_2 
 _geom_angle_atom_site_label_3 
 _geom_angle 
 _geom_angle_site_symmetry_1 
 _geom_angle_site_symmetry_3 
 _geom_angle_publ_flag 
O2 Sn1 O2 96.58(13) 3 . ? 
O2 Sn1 O1 74.19(8) 3 . ? 
O2 Sn1 O1 74.31(9) . . ? 
O2 Sn1 O1 73.23(9) 3 4 ? 
O2 Sn1 O1 72.95(9) . 4 ? 
O1 Sn1 O1 130.00(11) . 4 ? 
O2 Sn2 O2 96.19(13) . 2 ? 
O2 Sn2 O1 73.64(9) . . ? 
O2 Sn2 O1 73.80(9) 2 . ? 
O2 Sn2 O1 73.80(9) . 2 ? 
O2 Sn2 O1 73.64(9) 2 2 ? 
O1 Sn2 O1 130.36(12) . 2 ? 
Sn1 O1 Sn2 97.91(10) . . ? 
Sn1 O1 Sn1 97.08(9) . 3 ? 
Sn2 O1 Sn1 97.35(9) . 3 ? 
Sn1 O1 H1 116.0 . . ? 
Sn2 O1 H1 112.6 . . ? 
Sn1 O1 H1 130.1 3 . ? 
Sn1 O2 Sn1 115.72(10) 4 . ? 
Sn1 O2 Sn2 115.55(10) 4 . ? 
Sn1 O2 Sn2 114.09(10) . . ? 
  
loop_ 
 _geom_hbond_atom_site_label_D 
 _geom_hbond_atom_site_label_H 
 _geom_hbond_atom_site_label_A 
 _geom_hbond_distance_DH 
 _geom_hbond_distance_HA 
 _geom_hbond_distance_DA 
 _geom_hbond_angle_DHA 
 _geom_hbond_site_symmetry_A 
O1 H1 O2  0.96 1.96 2.881(4) 160.4 6 
  
_refine_diff_density_max    0.553 
_refine_diff_density_min   -0.552 
_refine_diff_density_rms    0.119 
  
_shelx_res_file 
; 
  
    HR514_0m.res created by SHELXL-2014/7 
  
  
TITL HR514_0m in P-42(1)c 
CELL 0.71073   7.8788   7.8788   9.0582  90.000  90.000  90.000 
ZERR    2.00   0.0001   0.0001   0.0002   0.000   0.000   0.000 
LATT -1 
SYMM -X, -Y, Z 
SYMM Y, -X, -Z 
SYMM -Y, X, -Z 
SYMM 0.5-X, 0.5+Y, 0.5-Z 
SYMM 0.5+X, 0.5-Y, 0.5-Z 
SYMM 0.5-Y, 0.5-X, 0.5+Z 
SYMM 0.5+Y, 0.5+X, 0.5+Z 
SFAC O  H  Sn 
UNIT 16  8  12 
LIST 4 ! automatically inserted. Change 6 to 4 for CHECKCIF!! 
OMIT 0 1 1 
OMIT -3 70 
MPLA 3 Sn1 Sn1_$5 Sn2 O1 
EQIV $5 y, -x, -z 
MPLA 3 Sn1 Sn1_$8 Sn2 O2 
EQIV $8 -y,x,-z 
L.S. 10 
rem DFIX 0.96 0.0001 O1 H1 
ACTA 
EQIV $6 x+1/2, -y+1/2, -z+1/2 
HTAB O1 O2_$6 
MORE 3 
BOND $H 
FMAP 2 
PLAN 10 
SIZE 0.073  0.073  0.075 
HTAB 
TEMP -173 
WGHT    0.000000    0.862500 
EXTI    0.002711 
FVAR       0.09199 
MOLE 1 
SN1   3    0.123376    0.292905    0.002238    11.00000    0.01065    0.00638 = 
         0.01085   -0.00102    0.00325   -0.00205 
SN2   3    0.000000    0.000000    0.276796    10.50000    0.01164    0.00851 = 
         0.00515    0.00000    0.00000    0.00156 
O1    1    0.249249    0.104425    0.168096    11.00000    0.00972    0.01123 = 
         0.00971   -0.00207   -0.00191   -0.00216 
AFIX   3 
H1    2    0.325441    0.153611    0.238876    11.00000    0.03246 
AFIX   0 
O2    1   -0.076827    0.184384    0.120876    11.00000    0.00736    0.00813 = 
         0.00773   -0.00060    0.00044    0.00020 
HKLF 4 
  
REM  HR514_0m in P-42(1)c 
REM R1 =  0.0127 for    1221 Fo > 4sig(Fo)  and  0.0133 for all    1242 data 
REM     35 parameters refined using      0 restraints 
  
END 
  
WGHT      0.0000      0.8498 
  
REM Instructions for potential hydrogen bonds 
HTAB O1 O2_$6 
  
REM Highest difference peak  0.553,  deepest hole -0.552,  1-sigma level  0.119 
Q1    1   0.0967  0.5289  0.0014  11.00000  0.05    0.55 
Q2    1   0.0000  0.0000  0.5000  10.25000  0.05    0.54 
Q3    1   0.0912  0.2918 -0.0625  11.00000  0.05    0.49 
Q4    1   0.1648  0.3751 -0.0005  11.00000  0.05    0.47 
Q5    1   0.0185  0.0792  0.2292  11.00000  0.05    0.47 
Q6    1   0.0000  0.0000  0.3482  10.50000  0.05    0.43 
Q7    1   0.0060  0.2185  0.0503  11.00000  0.05    0.42 
Q8    1   0.1723  0.2252 -0.0054  11.00000  0.05    0.40 
Q9    1   0.2994  0.4655 -0.0155  11.00000  0.05    0.39 
Q10   1  -0.0454  0.3383 -0.0013  11.00000  0.05    0.39 
; 
_shelx_res_checksum   57573 
  
_shelx_hkl_file 
; 
   0  -1   0    0.02    0.03 
   0   1   0    0.02    0.04 
   1   0   0    0.01    0.03 
   1   0   0   -0.03    0.02 
   0  -1   0   -0.02    0.04 
  -1   0   0   -0.01    0.03 
   0  -1   0    0.01    0.05 
   0   1   0    0.40    0.10 
  -1   0   0    0.16    0.04 
   0  -1   0   -0.05    0.05 
   0  -1   0   -0.01    0.03 
   0   1   0    0.05    0.05 
   0   1   0    0.17    0.07 
   0   1   0    0.05    0.04 
   0  -1   0   -0.03    0.03 
  -1   0   0    0.03    0.03 
   0  -1   0    0.03    0.06 
  -1   1   0  137.57    9.69 
  -1   1   0  141.70    8.94 
  -1   1   0  157.33    9.22 
   1  -1   0  159.25   10.23 
   1   1   0  135.88   10.20 
  -1   1   0  148.98    8.95 
   1  -1   0  129.32   10.19 
  -1   1   0  154.97    9.68 
   1   1   0  131.01   10.20 
   1  -1   0  135.96    9.22 
   1   1   0  132.89    9.20 
  -1  -1   0  149.92    9.67 
  -1  -1   0  138.78    9.66 
   1   1   0  145.94    9.14 
  -1   1   0  154.41   10.23 
   1   1   0  140.49    9.66 
  -1   1   0  148.96    8.93 
  -1   1   0  148.93    9.61 
  -1   1   0  150.72    9.20 
  -1   1   0  147.35    9.12 
  -1   2   0  236.64   17.30 
  -1   2   0  281.55   19.21 
   1  -2   0  247.86   19.21 
  -1   2   0  298.39   16.85 
   2   1   0  250.99   19.15 
   2   1   0  285.45   19.17 
   2   1   0  288.62   18.16 
   1  -2   0  254.95   16.99 
  -2  -1   0  286.06   17.31 
   2   1   0  273.88   18.17 
   1  -2   0  250.59   17.29 
  -2  -1   0  259.09   19.16 
  -1   2   0  257.87   16.82 
   2   1   0  276.85   17.15 
  -2  -1   0  265.21   19.16 
   2   1   0  277.03   16.22 
  -1   2   0  270.61   18.25 
  -1   2   0  285.35   17.35 
   1  -2   0  267.78   17.95 
   1  -2   0  305.80   17.39 
   1  -2   0  262.11   17.12 
  -1   2   0  293.08   19.24 
  -1   2   0  258.04   16.79 
  -1   2   0  281.45   17.17 
   2   1   0  269.28   17.30 
   1  -2   0  270.40   19.21 
   1  -2   0  285.78   17.48 
  -2  -1   0  282.49   18.15 
  -2   0   0    0.15    0.10 
   0  -2   0    0.07    0.15 
   0  -2   0    0.02    0.16 
   0  -2   0    0.96    0.22 
   0  -2   0    0.01    0.17 
   0   2   0    0.19    0.17 
   0  -2   0    0.37    0.21 
   0  -2   0    0.11    0.17 
   2   0   0    0.25    0.12 
  -2   0   0    0.11    0.12 
  -2   0   0    0.45    0.11 
   0   2   0   -0.02    0.15 
   0   2   0    0.03    0.16 
  -2   0   0    0.31    0.12 
   0   2   0   -0.08    0.18 
   2   0   0    0.16    0.12 
   2   0   0    0.55    0.13 
   2   0   0   -0.09    0.09 
   0   2   0    0.29    0.18 
   0   2   0    0.11    0.16 
   2   0   0    0.43    0.12 
   0   2   0    0.54    0.23 
  -2   1   0  284.98   18.03 
   1   2   0  256.73   19.27 
  -1  -2   0  244.69   19.25 
  -1  -2   0  261.00   17.40 
  -2   1   0  267.79   16.82 
  -1  -2   0  300.63   16.86 
   1   2   0  304.25   17.41 
  -2   1   0  262.24   19.23 
   2  -1   0  275.68   17.21 
   2  -1   0  258.83   19.22 
  -2   1   0  268.63   16.83 
   1   2   0  267.32   18.30 
  -2   1   0  257.08   17.35 
   1   2   0  239.92   19.24 
  -2   1   0  256.40   18.24 
   2  -1   0  270.85   18.23 
  -1  -2   0  262.83   19.27 
   1   2   0  294.40   18.26 
  -2   1   0  286.15   17.17 
  -2   1   0  267.47   16.85 
  -1  -2   0  292.61   16.89 
  -1  -2   0  300.64   16.89 
   1   2   0  319.20   17.22 
   2  -1   0  248.16   19.22 
  -1  -2   0  288.97   17.19 
  -1  -2   0  237.83   18.24 
   1   2   0  306.94   17.43 
   2  -1   0  289.02   18.25 
   2  -1   0  254.06   16.27 
   1   2   0  311.91   18.27 
  -2   1   0  273.16   19.25 
  -2   1   0  268.61   16.86 
   1   2   0  246.76   17.24 
   2  -1   0  263.02   17.37 
  -2   2   0  136.40    8.57 
   2   2   0  126.61    9.20 
  -2  -2   0  135.87    8.22 
  -2  -2   0  142.41    9.23 
   2   2   0  136.41    8.74 
  -2   2   0  122.02    9.22 
   2  -2   0  122.96    7.82 
  -2  -2   0  116.75    8.04 
  -2   2   0  134.90    8.28 
  -2  -2   0  120.25    8.33 
   2   2   0  128.46    8.28 
   2  -2   0  127.06    8.58 
   2   2   0  108.88    9.17 
   2  -2   0  119.90    8.35 
  -2  -2   0  134.59    8.73 
  -2   2   0  128.41    9.26 
  -2   2   0  136.25    8.09 
   2   2   0  123.89    8.33 
   2  -2   0  116.35    9.21 
   2   2   0  133.42    8.18 
  -2   2   0  136.57    8.06 
  -2   2   0  133.72    8.79 
   2  -2   0  122.60    8.10 
  -2  -2   0  133.88    8.04 
  -2   2   0  136.49    8.07 
   2  -2   0  134.25    8.76 
   2   2   0  121.55    7.81 
   2   2   0  134.79    8.32 
  -2  -2   0  133.84    8.03 
   2  -2   0  120.03    8.42 
   2   2   0  134.45    8.78 
   2  -2   0  118.91    9.23 
  -2   2   0  151.76    8.36 
   2  -2   0  129.39    8.33 
  -2   2   0  133.08    8.26 
   2  -2   0  131.18    8.20 
  -3  -2   0    0.50    0.14 
   3   2   0    0.73    0.25 
  -3  -2   0    0.58    0.26 
  -2   3   0    0.38    0.25 
   2  -3   0    0.34    0.22 
   3   2   0    0.36    0.21 
  -3  -2   0    0.50    0.14 
  -2   3   0    1.15    0.29 
  -2   3   0    0.33    0.21 
   3   2   0    0.23    0.18 
  -2   3   0    0.96    0.29 
  -2   3   0    0.12    0.22 
   2  -3   0    0.21    0.23 
   2  -3   0    0.30    0.27 
   3   2   0    0.63    0.22 
   3   2   0    0.82    0.19 
   3   2   0    1.13    0.24 
   2  -3   0    0.17    0.21 
   2  -3   0    0.81    0.30 
  -3  -2   0    1.05    0.24 
  -3  -2   0    0.35    0.15 
  -3  -2   0    0.51    0.22 
   2  -3   0    0.62    0.28 
  -2   3   0    0.67    0.29 
   2  -3   0    0.50    0.21 
   2  -3   0    0.31    0.24 
  -2   3   0    0.47    0.25 
   2  -3   0    0.41    0.14 
  -2   3   0    0.18    0.23 
   3   2   0    0.07    0.16 
   3   2   0    0.93    0.26 
  -3  -2   0    0.55    0.19 
  -2   3   0    0.33    0.21 
   2  -3   0    1.41    0.32 
  -3  -2   0    0.41    0.22 
   1  -3   0  423.16   28.58 
   1  -3   0  446.07   27.63 
   1  -3   0  465.02   28.38 
  -1   3   0  428.01   28.08 
   3   1   0  423.47   28.84 
   1  -3   0  492.30   28.89 
   1  -3   0  431.32   29.14 
  -3  -1   0  455.47   31.96 
  -1   3   0  453.13   28.92 
   1  -3   0  463.53   30.37 
  -1   3   0  452.46   28.65 
  -3  -1   0  525.36   31.99 
   1  -3   0  421.73   28.95 
   3   1   0  447.96   28.56 
   1  -3   0  430.36   32.06 
   3   1   0  450.90   30.29 
  -3  -1   0  484.72   30.27 
   3   1   0  460.51   27.03 
   3   1   0  435.02   27.02 
  -3  -1   0  506.18   28.86 
  -1   3   0  419.32   30.42 
   3   1   0  458.29   28.58 
   1  -3   0  478.29   32.05 
   0   3   0    0.06    0.23 
   3   0   0    0.84    0.17 
   0  -3   0    0.04    0.20 
   0  -3   0    0.79    0.30 
   0   3   0    0.08    0.23 
   0  -3   0    0.83    0.29 
  -3   0   0    0.93    0.18 
   3   0   0    0.26    0.17 
   0   3   0    0.24    0.22 
   0   3   0    0.67    0.28 
   0   3   0    0.20    0.21 
   0   3   0    0.00    0.24 
   3   0   0    0.08    0.15 
   3   0   0    0.18    0.14 
   3   0   0    0.33    0.15 
  -3   0   0    0.13    0.14 
   0  -3   0    0.47    0.25 
   0   3   0    0.00    0.18 
  -3   0   0    0.42    0.13 
  -3   0   0    0.37    0.13 
   0  -3   0    0.43    0.27 
   3   0   0    0.17    0.14 
   0   3   0    0.01    0.21 
   0  -3   0   -0.25    0.17 
   1   3   0  441.54   29.38 
  -3   1   0  446.73   32.83 
   3  -1   0  504.01   31.16 
   3  -1   0  469.79   29.38 
   1   3   0  419.07   29.70 
  -1  -3   0  525.95   28.41 
  -1  -3   0  503.59   28.86 
  -1  -3   0  498.90   28.85 
   3  -1   0  466.17   32.81 
   1   3   0  460.99   29.47 
  -1  -3   0  499.65   28.80 
  -3   1   0  518.67   31.15 
   3  -1   0  520.22   29.68 
  -1  -3   0  445.49   29.36 
  -1  -3   0  492.68   32.92 
   3  -1   0  461.18   32.83 
  -3   1   0  425.29   28.72 
   3  -1   0  452.92   31.12 
   3  -1   0  427.52   27.78 
  -1  -3   0  396.62   31.16 
  -3   1   0  424.40   28.77 
   1   3   0  457.79   32.92 
  -3   1   0  446.89   29.63 
   3  -1   0  480.33   27.79 
   1   3   0  445.61   32.90 
   1   3   0  493.85   27.90 
  -3   1   0  464.85   28.75 
  -1  -3   0  480.61   29.75 
  -1  -3   0  450.08   32.93 
  -3   1   0  482.54   32.86 
   1   3   0  443.95   31.24 
  -3   1   0  508.16   29.31 
  -3   1   0  464.49   28.80 
  -2  -3   0    0.13    0.16 
  -3   2   0    0.22    0.15 
  -3   2   0    0.03    0.15 
   3  -2   0    0.64    0.24 
  -2  -3   0    0.33    0.26 
  -2  -3   0    0.74    0.24 
  -3   2   0    0.22    0.15 
   3  -2   0    0.73    0.18 
  -3   2   0    0.34    0.15 
  -2  -3   0    0.42    0.24 
   3  -2   0    0.48    0.22 
  -2  -3   0    0.85    0.31 
  -3   2   0    0.57    0.22 
   3  -2   0    0.96    0.29 
   3  -2   0    0.42    0.28 
   3  -2   0    0.18    0.21 
   3  -2   0    0.52    0.22 
  -2  -3   0    0.57    0.28 
  -3   2   0    0.39    0.25 
   2   3   0    0.55    0.28 
   3  -2   0    0.29    0.22 
   2   3   0    0.22    0.25 
  -3   2   0    0.03    0.15 
  -3   2   0    0.90    0.26 
   2   3   0    0.78    0.25 
   2   3   0    0.59    0.25 
   2   3   0    0.97    0.27 
  -2  -3   0    0.13    0.16 
   2   3   0    1.37    0.36 
  -3   2   0    0.45    0.23 
  -2  -3   0    0.71    0.26 
   2   3   0    0.45    0.28 
  -3   2   0    0.30    0.21 
  -2  -3   0    0.69    0.27 
   3  -2   0    0.66    0.24 
   3  -3   0    0.64    0.29 
  -3   3   0    0.35    0.24 
   3  -3   0    0.08    0.27 
  -3  -3   0    0.17    0.26 
  -3   3   0    0.53    0.28 
  -3  -3   0    0.38    0.25 
  -3  -3   0    0.79    0.24 
  -3   3   0    0.46    0.27 
   3   3   0    0.08    0.18 
   3   3   0    0.40    0.25 
  -3  -3   0    0.34    0.19 
   3  -3   0    0.83    0.15 
  -3   3   0   -0.18    0.20 
   3   3   0    0.96    0.20 
  -3   3   0    0.31    0.23 
   3  -3   0    0.29    0.27 
  -3   3   0    0.27    0.20 
   3  -3   0    0.41    0.26 
  -3   3   0    0.18    0.25 
   3   3   0    0.17    0.24 
   3  -3   0    0.30    0.21 
  -3   3   0    0.27    0.20 
  -3  -3   0    1.29    0.33 
  -3  -3   0    0.17    0.27 
  -3   3   0    0.55    0.31 
   3   3   0    0.15    0.25 
   3  -3   0    0.27    0.24 
   3   3   0    0.31    0.23 
   3  -3   0    0.24    0.25 
  -3  -3   0    0.21    0.22 
   3   3   0    0.93    0.33 
   3  -3   0    0.27    0.26 
   3  -3   0   -0.08    0.19 
  -3  -3   0    0.07    0.24 
  -3  -3   0    0.34    0.19 
   4   3   0   59.49    4.56 
   3  -4   0   67.01    4.12 
  -4  -3   0   59.94    4.20 
  -4  -3   0   57.15    4.66 
  -4  -3   0   59.67    4.14 
  -4  -3   0   68.77    4.03 
   4   3   0   62.71    4.22 
   4   3   0   66.20    4.20 
  -3   4   0   67.79    4.15 
   3  -4   0   70.59    4.76 
   4   3   0   55.41    3.93 
   4   3   0   65.44    4.23 
  -3   4   0   61.81    4.30 
  -3   4   0   66.44    4.31 
   3  -4   0   64.74    4.37 
  -3   4   0   65.43    4.18 
   3  -4   0   65.24    4.07 
  -3   4   0   61.56    4.55 
  -4  -3   0   68.72    4.02 
   3  -4   0   65.88    4.21 
  -4  -3   0   61.12    4.36 
  -3   4   0   59.23    4.78 
  -3   4   0   61.69    4.75 
   3  -4   0   51.01    4.45 
  -4  -3   0   61.10    4.65 
  -3   4   0   61.96    4.24 
  -4  -3   0   64.43    4.07 
   4   3   0   62.38    4.56 
   4   3   0   61.53    4.46 
   3  -4   0   62.74    4.17 
   3  -4   0   64.56    4.77 
  -4  -3   0   60.34    4.02 
   3  -4   0   58.59    4.04 
   3  -4   0   57.64    4.31 
  -3   4   0   67.78    4.14 
   4   2   0  605.92   37.19 
   4   2   0  596.24   39.18 
   2  -4   0  560.56   39.33 
  -4  -2   0  586.06   34.99 
  -4  -2   0  593.63   39.23 
   4   2   0  526.68   35.07 
   2  -4   0  527.05   35.06 
   2  -4   0  558.49   37.29 
   4   2   0  587.35   33.17 
   4   2   0  474.83   33.15 
  -2   4   0  561.76   39.37 
  -2   4   0  567.64   39.35 
  -4  -2   0  537.11   37.11 
   2  -4   0  477.64   39.32 
   2  -4   0  583.93   36.74 
  -2   4   0  588.50   34.50 
   2  -4   0  552.68   35.57 
   2  -4   0  547.25   33.90 
  -2   4   0  559.61   37.38 
   4   2   0  600.45   39.17 
   4   2   0  489.29   35.37 
  -4  -2   0  509.85   39.20 
  -2   4   0  522.99   34.40 
  -4  -2   0  509.45   34.32 
  -2   4   0  558.64   35.19 
   2  -4   0  563.03   35.78 
   4   2   0  598.76   37.21 
  -4  -2   0  580.08   34.34 
  -2   4   0  617.10   35.55 
  -2   4   0  531.02   35.49 
   4   2   0  563.32   35.05 
  -4  -2   0  566.52   35.40 
  -4  -2   0  579.93   34.28 
  -2   4   0  523.04   34.46 
   2  -4   0  608.82   34.82 
  -4  -1   0  114.78    6.72 
   1  -4   0  111.40    7.23 
  -4  -1   0   95.23    7.44 
  -4  -1   0  110.08    7.00 
   1  -4   0  104.49    6.81 
   1  -4   0  103.30    6.62 
  -1   4   0  100.79    6.84 
   4   1   0  102.17    6.72 
  -1   4   0   94.65    7.63 
   1  -4   0  105.00    7.66 
  -1   4   0  109.62    6.88 
   1  -4   0   99.49    6.77 
  -1   4   0  117.24    6.91 
   4   1   0   96.20    6.28 
   4   1   0  106.95    6.67 
   4   1   0  100.65    7.06 
   1  -4   0  103.13    7.62 
  -1   4   0  107.92    6.91 
   4   1   0  101.84    6.29 
   1  -4   0  111.36    6.70 
   4   1   0  100.22    6.67 
   1  -4   0   92.63    6.90 
  -1   4   0  108.20    6.89 
   1  -4   0  103.31    6.91 
  -4  -1   0  109.14    7.46 
   4   0   0   30.00    2.10 
   0   4   0   32.66    2.28 
  -4   0   0   32.14    2.17 
   0  -4   0   32.01    2.23 
   0  -4   0   28.15    2.35 
   0  -4   0   34.33    2.20 
  -4   0   0   31.75    2.32 
   0   4   0   33.31    2.34 
   0  -4   0   31.27    2.32 
   0   4   0   33.69    2.30 
   4   0   0   33.77    1.98 
   0  -4   0   27.84    2.48 
   4   0   0   31.12    2.10 
  -4   0   0   32.41    2.35 
   0   4   0   27.68    2.24 
   0  -4   0   33.50    2.26 
   0  -4   0   35.48    2.26 
   0   4   0   28.13    2.52 
  -4   0   0   31.00    2.09 
   4   0   0   33.14    2.12 
   4   0   0   29.32    1.96 
   0   4   0   26.43    2.40 
   4   0   0   32.75    2.11 
   4   0   0   30.47    2.21 
   1   4   0  113.03    7.69 
  -1  -4   0   97.40    6.92 
  -1  -4   0   96.38    6.81 
   1   4   0  106.21    6.87 
   4  -1   0  103.93    7.14 
   1   4   0   97.34    6.53 
   4  -1   0  114.63    6.39 
  -1  -4   0   97.27    7.66 
   1   4   0  105.91    7.34 
   4  -1   0  105.72    7.18 
   4  -1   0  102.08    7.46 
  -1  -4   0   94.26    7.25 
  -1  -4   0  107.43    6.78 
  -4   1   0  105.18    6.72 
  -4   1   0   97.93    7.54 
  -4   1   0  116.97    6.80 
  -4   1   0  108.61    6.54 
  -4   1   0  101.38    7.53 
  -1  -4   0   93.89    6.64 
   4  -1   0  102.70    6.76 
   1   4   0   99.78    6.92 
   4  -1   0  113.49    6.38 
  -1  -4   0  115.66    6.71 
   1   4   0  119.70    7.74 
  -1  -4   0  103.45    6.97 
  -4   1   0  108.62    6.53 
  -4   1   0   99.72    6.55 
  -4   1   0   99.98    6.54 
  -4   1   0  113.46    7.15 
   4  -1   0  112.60    7.46 
  -1  -4   0  115.58    6.72 
   4  -1   0  102.69    6.81 
   4  -1   0   99.56    6.73 
   2   4   0  570.03   39.14 
   2   4   0  507.83   39.14 
   4  -2   0  502.29   35.28 
  -4   2   0  522.07   35.26 
  -2  -4   0  537.60   39.18 
   4  -2   0  542.22   34.97 
  -4   2   0  538.28   34.24 
  -2  -4   0  564.07   34.93 
   2   4   0  496.17   35.33 
  -2  -4   0  522.93   34.29 
  -4   2   0  614.52   34.24 
  -2  -4   0  530.26   39.15 
  -4   2   0  522.25   39.06 
   2   4   0  514.60   37.16 
   2   4   0  646.33   33.22 
  -2  -4   0  526.96   35.38 
  -4   2   0  565.45   34.91 
   4  -2   0  567.28   33.07 
   4  -2   0  554.50   39.04 
  -2  -4   0  561.79   34.33 
  -2  -4   0  584.37   37.12 
  -4   2   0  513.90   39.07 
   4  -2   0  593.17   35.28 
   4  -2   0  520.92   33.06 
   4  -2   0  591.08   37.11 
  -2  -4   0  563.69   33.78 
  -4   2   0  613.92   34.18 
  -4   2   0  538.47   34.19 
   4  -2   0  583.05   39.02 
   4  -2   0  567.38   37.03 
  -2  -4   0  524.51   34.23 
   2   4   0  632.42   35.13 
  -4   2   0  606.88   37.08 
   2   4   0  539.38   34.93 
  -4   3   0   58.04    4.03 
  -4   3   0   67.18    4.12 
   3   4   0   62.68    4.51 
  -4   3   0   57.65    4.68 
   4  -3   0   57.89    3.95 
   4  -3   0   57.95    3.96 
   4  -3   0   67.54    4.26 
  -4   3   0   59.49    4.65 
  -3  -4   0   62.91    4.10 
  -3  -4   0   65.00    4.18 
   3   4   0   66.20    4.11 
  -4   3   0   67.55    4.23 
   3   4   0   65.82    4.29 
   3   4   0   60.61    4.21 
   4  -3   0   62.57    4.35 
  -4   3   0   58.03    4.03 
   4  -3   0   61.42    4.07 
  -4   3   0   67.17    4.21 
   4  -3   0   60.21    4.41 
   3   4   0   69.35    4.70 
   3   4   0   62.51    3.99 
   4  -3   0   60.75    4.02 
   4  -3   0   58.29    4.03 
  -3  -4   0   61.92    4.41 
  -3  -4   0   64.24    4.69 
  -3  -4   0   59.70    4.05 
  -3  -4   0   59.90    4.05 
   4  -3   0   60.88    4.60 
  -4   3   0   67.95    4.48 
   3   4   0   60.76    4.63 
  -4   3   0   64.42    4.08 
  -3  -4   0   63.38    4.74 
   4  -3   0   65.06    4.25 
   3   4   0   65.30    4.02 
  -3  -4   0   58.35    4.08 
   4  -3   0   58.20    4.63 
  -3  -4   0   59.51    4.25 
   4   4   0    3.14    0.49 
  -4   4   0    2.35    0.53 
  -4   4   0    2.89    0.46 
   4  -4   0    2.16    0.54 
   4  -4   0    2.33    0.50 
  -4   4   0    2.11    0.56 
  -4   4   0    3.04    0.52 
  -4  -4   0    2.46    0.44 
  -4   4   0    2.89    0.46 
  -4  -4   0    2.31    0.44 
   4  -4   0    2.42    0.53 
   4   4   0    2.04    0.46 
  -4  -4   0    2.22    0.51 
   4   4   0    2.29    0.53 
  -4  -4   0    3.49    0.58 
   4  -4   0    2.28    0.49 
  -4  -4   0    1.50    0.37 
   4   4   0    2.05    0.47 
   4   4   0    2.86    0.50 
   4  -4   0    2.10    0.40 
   4   4   0    2.56    0.45 
  -4  -4   0    2.16    0.46 
   4  -4   0    4.44    0.63 
   4  -4   0    2.89    0.63 
  -4   4   0    2.04    0.54 
  -4  -4   0    3.17    0.51 
   4   4   0    2.81    0.57 
  -4   4   0    2.02    0.48 
  -4   4   0    2.03    0.53 
  -4  -4   0    5.02    0.64 
   4  -4   0    2.38    0.46 
   4  -4   0    2.18    0.57 
   4  -4   0    1.98    0.51 
  -4  -4   0    1.50    0.37 
  -4   4   0    1.94    0.45 
   5   4   0   22.04    1.79 
   5   4   0   25.40    1.64 
   5   4   0   24.32    1.77 
  -4   5   0   22.27    2.01 
  -5  -4   0   19.69    1.59 
  -5  -4   0   21.35    1.70 
  -4   5   0   20.23    1.78 
   5   4   0   20.66    1.58 
   4  -5   0   26.43    2.08 
  -4   5   0   24.07    1.92 
  -4   5   0   22.85    1.83 
   4  -5   0   23.04    1.73 
  -5  -4   0   21.85    1.73 
  -4   5   0   20.39    1.94 
   4  -5   0   21.23    1.76 
   4  -5   0   20.86    1.98 
   5   4   0   21.57    1.68 
   4  -5   0   20.43    1.89 
  -4   5   0   23.08    1.77 
   5   4   0   21.09    1.56 
  -5  -4   0   27.11    1.76 
   5   4   0   22.10    1.86 
   4  -5   0   24.93    2.01 
   4  -5   0   22.78    1.88 
   4  -5   0   21.27    1.90 
   5   4   0   22.63    1.71 
  -5  -4   0   19.80    1.86 
  -4   5   0   22.71    2.05 
   5   4   0   21.07    1.63 
  -4   5   0   20.80    1.78 
   4  -5   0   18.36    1.66 
  -5  -4   0   21.31    1.91 
  -5  -4   0   20.38    1.70 
   4  -5   0   20.56    1.66 
  -5  -4   0   19.66    1.59 
   4  -5   0   22.75    1.78 
  -5  -4   0   22.19    1.64 
   4  -5   0   20.03    1.67 
   3  -5   0  134.90   10.30 
   3  -5   0  163.89   10.97 
   5   3   0  161.85    9.68 
   3  -5   0  139.46    9.23 
   3  -5   0  145.62   10.87 
   5   3   0  140.14    9.64 
  -3   5   0  144.79   10.40 
  -5  -3   0  134.60    9.34 
  -3   5   0  158.07    9.85 
  -3   5   0  143.50   10.91 
   3  -5   0  141.08    9.94 
   3  -5   0  140.02    9.08 
  -5  -3   0  153.41   10.10 
   3  -5   0  149.95    9.66 
  -3   5   0  151.37    9.83 
   3  -5   0  151.82    9.41 
  -5  -3   0  164.26    9.30 
  -5  -3   0  133.37   10.74 
  -3   5   0  157.21    9.57 
  -5  -3   0  150.21    9.35 
   3  -5   0  146.74    9.89 
  -5  -3   0  145.12   10.74 
  -3   5   0  166.88    9.85 
  -3   5   0  158.21    9.55 
  -5  -3   0  144.44    9.68 
   3  -5   0  144.47    9.32 
  -5  -3   0  148.21    9.57 
   3  -5   0  148.47    9.27 
   5   3   0  135.67    9.06 
   5   3   0  151.15    9.07 
  -3   5   0  157.41   10.95 
  -5  -3   0  150.60    9.33 
   5   3   0  153.42   10.23 
  -3   5   0  170.84    9.89 
  -3   5   0  158.28    9.53 
   3  -5   0  154.10    9.96 
   5   3   0  150.75    9.61 
   3  -5   0  144.64    9.49 
   2  -5   0    0.76    0.39 
   2  -5   0    1.22    0.39 
   5   2   0    1.82    0.32 
  -2   5   0    1.72    0.51 
   5   2   0    1.93    0.33 
  -5  -2   0    1.91    0.24 
  -2   5   0    0.85    0.39 
   2  -5   0    1.01    0.45 
   2  -5   0    2.62    0.53 
   2  -5   0    1.50    0.33 
  -5  -2   0    1.25    0.35 
  -2   5   0    1.63    0.47 
  -2   5   0    1.51    0.43 
  -5  -2   0    1.94    0.32 
   2  -5   0    0.53    0.41 
   5   2   0    1.67    0.35 
  -5  -2   0    1.38    0.36 
  -2   5   0    1.30    0.46 
   2  -5   0    1.41    0.46 
   2  -5   0    1.07    0.43 
   5   2   0    1.71    0.36 
  -5  -2   0    1.49    0.24 
   5   2   0    2.61    0.43 
   2  -5   0    1.59    0.53 
  -2   5   0    1.57    0.55 
   5   2   0    1.80    0.33 
   2  -5   0    1.36    0.45 
  -5  -2   0    1.41    0.34 
   2  -5   0    1.85    0.51 
  -2   5   0    1.05    0.45 
  -2   5   0    0.61    0.44 
   5   2   0    1.62    0.30 
  -5  -2   0    1.91    0.24 
   5   1   0   35.75    2.21 
   1  -5   0   35.24    2.66 
   5   1   0   35.52    2.37 
   1  -5   0   38.38    2.51 
   5   1   0   38.72    2.38 
  -5  -1   0   34.58    2.65 
   1  -5   0   36.29    2.94 
  -5  -1   0   35.40    2.33 
  -1   5   0   34.12    2.82 
   5   1   0   35.01    2.51 
  -5  -1   0   34.43    2.35 
  -1   5   0   34.53    2.61 
  -1   5   0   35.20    2.59 
   1  -5   0   36.45    2.56 
   1  -5   0   31.40    2.67 
  -1   5   0   34.36    2.92 
   5   1   0   33.93    2.38 
  -1   5   0   41.06    2.75 
   5   1   0   36.07    2.40 
  -5  -1   0   32.22    2.63 
  -1   5   0   29.98    2.56 
   1  -5   0   36.75    2.61 
   1  -5   0   35.32    2.57 
  -1   5   0   32.76    2.56 
   5   1   0   37.04    2.21 
   0   5   0    0.02    0.32 
   0  -5   0    0.25    0.35 
   5   0   0   -0.20    0.15 
   0  -5   0   -0.27    0.33 
   5   0   0    0.01    0.19 
   5   0   0    0.32    0.18 
   0   5   0    0.03    0.37 
   5   0   0    0.44    0.21 
  -5   0   0    0.31    0.16 
  -5   0   0    0.34    0.23 
   0  -5   0    1.00    0.38 
   0   5   0   -0.08    0.30 
   0  -5   0    0.24    0.36 
  -5   0   0    0.08    0.22 
   0  -5   0    0.25    0.33 
   0   5   0    1.44    0.43 
   0   5   0    0.47    0.33 
  -5   0   0    0.10    0.17 
   5   0   0    0.41    0.20 
   0  -5   0    0.38    0.34 
   0  -5   0   -0.31    0.25 
   0   5   0    0.17    0.32 
   5   0   0    2.18    0.33 
   5   0   0    0.18    0.25 
   5  -1   0   32.59    2.31 
  -1  -5   0   37.10    2.62 
  -5   1   0   35.18    2.36 
  -1  -5   0   40.90    2.59 
   5  -1   0   35.12    2.33 
  -5   1   0   37.01    2.57 
   5  -1   0   37.28    2.52 
  -5   1   0   35.18    2.33 
   5  -1   0   39.11    2.51 
   1   5   0   34.35    2.86 
   1   5   0   37.37    2.67 
   1   5   0   37.63    2.67 
  -1  -5   0   38.25    2.75 
   1   5   0   34.01    2.96 
  -5   1   0   35.69    2.78 
  -1  -5   0   37.19    2.58 
  -1  -5   0   36.87    2.65 
   1   5   0   35.13    2.57 
  -5   1   0   38.06    2.47 
  -1  -5   0   38.74    2.81 
  -1  -5   0   40.88    2.58 
  -1  -5   0   34.45    2.94 
  -5   1   0   35.27    2.36 
  -5   1   0   35.17    2.33 
   5  -1   0   38.24    2.50 
   5  -1   0   37.34    2.62 
   5  -1   0   40.93    2.68 
  -1  -5   0   31.37    2.95 
  -1  -5   0   35.01    2.62 
   1   5   0   32.53    2.69 
  -5   1   0   38.71    2.47 
   1   5   0   36.10    2.94 
  -5   1   0   36.04    2.76 
   5  -2   0    2.64    0.42 
  -5   2   0    1.55    0.29 
  -5   2   0    1.35    0.37 
   5  -2   0    1.95    0.30 
  -5   2   0    1.48    0.33 
  -2  -5   0    2.03    0.50 
  -2  -5   0    0.99    0.46 
  -2  -5   0    0.99    0.36 
  -2  -5   0    1.71    0.50 
   2   5   0    1.29    0.43 
  -5   2   0    1.40    0.40 
   5  -2   0    1.54    0.38 
   5  -2   0    1.76    0.37 
  -5   2   0    1.64    0.36 
   2   5   0    3.10    0.55 
  -2  -5   0    0.86    0.43 
   5  -2   0    1.34    0.34 
   2   5   0    1.60    0.48 
  -2  -5   0    0.99    0.36 
  -2  -5   0    0.84    0.40 
  -5   2   0    3.31    0.41 
   2   5   0    1.25    0.46 
   5  -2   0    1.40    0.35 
  -2  -5   0    1.39    0.44 
   2   5   0    1.68    0.53 
  -5   2   0    1.55    0.29 
  -2  -5   0    3.35    0.53 
   5  -2   0    1.86    0.33 
   5  -2   0    1.53    0.41 
   2   5   0    1.49    0.46 
  -2  -5   0    2.05    0.54 
   2   5   0    2.10    0.56 
   2   5   0    1.91    0.52 
  -5   2   0    3.30    0.41 
   2   5   0    2.05    0.50 
   5  -2   0    1.56    0.53 
  -5   2   0    1.34    0.37 
   5  -3   0  145.71    9.69 
   5  -3   0  151.98    9.15 
   3   5   0  135.30    8.98 
   3   5   0  143.44   10.35 
  -3  -5   0  140.09    9.44 
   5  -3   0  134.84    9.72 
   3   5   0  135.55   10.81 
   3   5   0  151.77    9.80 
  -5   3   0  159.42    9.68 
   5  -3   0  143.66   10.68 
  -3  -5   0  137.84    9.48 
   3   5   0  166.60   10.84 
  -5   3   0  138.82   10.76 
  -5   3   0  151.64   10.24 
  -5   3   0  143.06    9.69 
  -5   3   0  147.41    9.44 
   5  -3   0  145.78    9.23 
   3   5   0  149.10    9.24 
  -3  -5   0  162.84   10.90 
   3   5   0  133.32    9.75 
  -5   3   0  137.32   10.79 
  -5   3   0  154.93    9.45 
  -5   3   0  158.16    9.60 
   3   5   0  146.36    9.60 
  -3  -5   0  139.90    9.46 
  -5   3   0  154.77    9.44 
  -5   3   0  148.61    9.40 
   3   5   0  166.89    9.32 
   3   5   0  155.84    9.23 
   3   5   0  140.67    9.32 
  -3  -5   0  169.37    9.70 
  -3  -5   0  165.92    9.89 
   5  -3   0  161.79   10.22 
  -3  -5   0  161.35    9.46 
  -5   3   0  148.58    9.38 
   5  -3   0  149.42    9.12 
   3   5   0  144.21    9.28 
  -3  -5   0  135.56   10.22 
  -3  -5   0  154.89   10.92 
   5  -3   0  165.22    9.34 
  -5   4   0   20.31    1.93 
   5  -4   0   23.05    1.84 
   5  -4   0   21.84    1.86 
   4   5   0   20.37    1.67 
   4   5   0   18.96    1.72 
  -4  -5   0   21.52    1.79 
  -5   4   0   23.61    1.73 
  -5   4   0   21.44    1.66 
  -4  -5   0   21.92    1.66 
  -5   4   0   23.29    1.83 
  -5   4   0   21.43    1.66 
  -5   4   0   22.96    1.76 
  -5   4   0   18.91    1.92 
   4   5   0   22.41    1.73 
  -4  -5   0   21.15    1.98 
  -5   4   0   22.25    1.88 
  -4  -5   0   25.13    1.79 
  -4  -5   0   21.92    1.66 
   5  -4   0   23.66    1.76 
   4   5   0   22.57    1.62 
  -4  -5   0   21.34    1.69 
   5  -4   0   23.27    1.68 
   4   5   0   21.96    1.86 
   5  -4   0   20.46    1.82 
   5  -4   0   19.79    1.66 
   5  -4   0   19.22    1.78 
  -4  -5   0   17.83    1.90 
   4   5   0   23.76    1.92 
  -4  -5   0   23.31    1.81 
   4   5   0   20.88    1.67 
   4   5   0   24.28    1.96 
   4   5   0   21.79    1.75 
   5  -4   0   19.60    1.62 
  -4  -5   0   20.69    1.77 
   5  -4   0   22.65    1.69 
   5  -4   0   20.55    1.62 
  -5  -5   0  438.94   24.47 
   5  -5   0  350.46   26.80 
   5  -5   0  406.88   24.00 
   5   5   0  446.10   23.98 
   5  -5   0  423.96   25.10 
   5   5   0  365.43   24.02 
   5   5   0  355.90   23.47 
  -5  -5   0  412.21   24.71 
  -5  -5   0  412.98   24.75 
   5  -5   0  396.80   24.25 
   5  -5   0  406.75   25.63 
  -5  -5   0  409.51   28.34 
  -5  -5   0  400.05   25.23 
  -5   5   0  346.67   26.85 
  -5  -5   0  382.66   24.77 
   5  -5   0  392.99   24.40 
  -5  -5   0  403.16   28.28 
   5   5   0  372.53   25.47 
  -5   5   0  381.22   24.86 
   5  -5   0  431.42   25.91 
   5  -5   0  379.74   24.08 
  -5   5   0  396.96   28.39 
   5  -5   0  394.03   24.08 
  -5   5   0  414.76   25.56 
  -5   5   0  416.31   25.57 
  -5   5   0  425.70   28.39 
   5   5   0  363.26   24.04 
  -5   5   0  425.69   25.41 
   5  -5   0  388.35   23.60 
   5   5   0  396.99   25.35 
   5   5   0  431.38   24.24 
   5   5   0  362.40   26.83 
   6   5   0   40.39    3.00 
   6   5   0   38.94    2.69 
   5  -6   0   41.75    2.84 
  -6  -5   0   35.40    2.79 
   5  -6   0   44.09    3.00 
  -5   6   0   44.69    3.13 
   6   5   0   46.60    2.79 
  -6  -5   0   37.61    3.28 
   5  -6   0   38.49    3.15 
  -5   6   0   38.90    3.02 
   5  -6   0   37.47    2.84 
  -5   6   0   43.06    3.46 
  -6  -5   0   42.58    2.96 
  -6  -5   0   41.16    2.91 
   5  -6   0   38.56    3.19 
  -6  -5   0   35.30    2.79 
  -5   6   0   40.54    3.30 
   5  -6   0   38.78    3.09 
   6   5   0   38.54    3.13 
   6   5   0   35.36    2.71 
  -6  -5   0   36.22    2.81 
   6   5   0   41.47    2.91 
   6   5   0   41.44    2.77 
  -5   6   0   36.62    3.07 
  -5   6   0   45.79    3.11 
   5  -6   0   34.40    2.79 
   5  -6   0   36.90    2.82 
   5  -6   0   41.83    2.92 
   6   5   0   41.96    2.85 
  -6  -5   0   43.85    3.31 
  -6  -4   0   52.52    4.79 
   4  -6   0   63.25    4.23 
   4  -6   0   63.52    5.00 
   4  -6   0   64.87    4.36 
   4  -6   0   59.01    4.32 
   4  -6   0   66.65    4.76 
  -4   6   0   59.55    4.81 
  -4   6   0   68.69    4.56 
   6   4   0   58.60    4.03 
  -4   6   0   66.92    5.05 
  -4   6   0   66.66    4.53 
  -6  -4   0   63.16    4.18 
   4  -6   0   62.91    4.10 
   4  -6   0   63.45    5.02 
   6   4   0   65.55    4.07 
  -6  -4   0   64.46    4.31 
  -6  -4   0   69.29    4.23 
   6   4   0   63.25    4.01 
   4  -6   0   62.71    4.58 
   4  -6   0   68.87    4.32 
  -6  -4   0   56.07    4.16 
   4  -6   0   71.45    4.25 
   6   4   0   60.50    4.04 
  -4   6   0   66.40    4.52 
   4  -6   0   61.40    4.54 
   6   4   0   66.92    4.65 
  -6  -4   0   63.15    4.17 
   6   4   0   66.47    4.34 
  -4   6   0   68.30    4.60 
   6   4   0   53.45    4.08 
   4  -6   0   61.61    4.25 
   6   4   0   64.57    4.32 
   6   4   0   72.26    4.42 
  -6  -4   0   58.89    4.81 
  -4   6   0   66.41    5.07 
   3  -6   0  162.88   10.33 
  -6  -3   0  150.36   10.39 
   3  -6   0  159.90   11.06 
  -3   6   0  165.97   10.94 
   6   3   0  167.07   10.71 
  -6  -3   0  172.68   11.96 
   6   3   0  172.87   11.36 
  -6  -3   0  176.62   10.65 
  -3   6   0  154.78   10.95 
   6   3   0  149.52   10.65 
   6   3   0  159.00   10.04 
   6   3   0  166.49   10.73 
   3  -6   0  168.52   10.50 
  -3   6   0  169.88   10.98 
  -3   6   0  149.47   12.17 
   3  -6   0  171.89   12.16 
   6   3   0  163.37   10.04 
   6   3   0  164.65   10.15 
  -6  -3   0  164.98   11.96 
   3  -6   0  184.92   10.19 
  -6  -3   0  173.73   10.39 
  -6  -3   0  173.44   10.38 
  -3   6   0  160.93   12.17 
  -3   6   0  156.70   10.94 
  -3   6   0  168.00   10.56 
   3  -6   0  188.27   10.61 
   3  -6   0  173.76   11.08 
   3  -6   0  170.46   12.21 
   3  -6   0  159.06   11.52 
   3  -6   0  159.47   10.40 
   3  -6   0  165.49   10.78 
  -3   6   0  166.97   11.63 
   3  -6   0  168.04   10.35 
  -6  -2   0  119.02    8.11 
   6   2   0  128.25    8.40 
  -2   6   0  136.45    9.28 
  -2   6   0  130.52    8.70 
   6   2   0  138.84    8.91 
  -6  -2   0  128.69    9.37 
  -2   6   0  130.42    9.71 
   6   2   0  122.24    8.39 
   2  -6   0  131.77    9.70 
   2  -6   0  128.29    8.40 
  -2   6   0  127.67    8.66 
   6   2   0  135.82    8.41 
   6   2   0  135.95    8.39 
   2  -6   0  118.34    8.73 
  -2   6   0  123.38    8.67 
   2  -6   0  126.44    8.52 
   2  -6   0  128.76    9.12 
  -6  -2   0  139.87    8.13 
   2  -6   0  130.45    8.21 
   6   2   0  124.69    7.85 
   2  -6   0  115.95    8.30 
  -2   6   0  139.56    8.71 
   2  -6   0  132.83    8.07 
  -6  -2   0  139.72    8.12 
   6   2   0  123.85    7.85 
  -2   6   0  136.06    9.68 
   2  -6   0  127.66    8.79 
  -6  -2   0  121.24    9.36 
   2  -6   0  133.10    8.26 
  -2   6   0  144.68    8.43 
   2  -6   0  137.46    8.74 
   2  -6   0  127.58    8.17 
   2  -6   0  138.83    9.66 
  -1   6   0    3.01    0.73 
   6   1   0    1.88    0.30 
  -1   6   0    2.13    0.62 
   1  -6   0    2.23    0.54 
  -6  -1   0    1.54    0.22 
   1  -6   0    2.79    0.63 
  -6  -1   0    2.25    0.23 
  -1   6   0    2.19    0.58 
   6   1   0    3.15    0.41 
   1  -6   0    3.70    0.77 
   1  -6   0    2.20    0.62 
   6   1   0    2.45    0.28 
   6   1   0    2.14    0.26 
   6   1   0    1.59    0.39 
  -6  -1   0    1.54    0.21 
  -1   6   0    2.09    0.60 
   1  -6   0    2.23    0.60 
   1  -6   0    2.05    0.56 
   1  -6   0    1.44    0.51 
  -1   6   0    2.80    0.63 
  -1   6   0    3.70    0.77 
   1  -6   0    2.05    0.63 
  -1   6   0    2.32    0.67 
  -1   6   0    2.21    0.61 
  -6  -1   0    2.48    0.41 
  -6  -1   0    2.26    0.23 
   6   1   0    2.26    0.38 
   1  -6   0    2.84    0.56 
  -6  -1   0    1.73    0.39 
   6   1   0    2.29    0.33 
   0   6   0   65.09    4.22 
   0   6   0   66.83    4.91 
   0  -6   0   60.45    4.55 
  -6   0   0   63.48    4.57 
  -6   0   0   60.68    3.89 
   0   6   0   67.56    4.49 
   0  -6   0   62.12    4.33 
   6   0   0   59.91    4.31 
   0  -6   0   63.57    4.30 
   0  -6   0   57.92    4.24 
   0  -6   0   62.17    4.14 
  -6   0   0   57.26    4.54 
   0   6   0   55.25    4.33 
  -6   0   0   61.65    3.87 
   6   0   0   60.88    4.08 
   6   0   0   59.34    3.77 
   6   0   0   61.91    4.06 
   0   6   0   59.02    4.34 
   6   0   0   60.02    4.09 
   0   6   0   61.03    4.72 
   6   0   0   64.56    4.07 
  -6   0   0   60.69    3.89 
   0  -6   0   64.55    4.22 
   6   0   0   61.71    3.79 
   0  -6   0   63.18    4.86 
   0   6   0   67.32    4.26 
  -6   0   0   64.31    4.06 
   0   6   0   70.28    4.89 
   0  -6   0   55.73    4.39 
  -6   0   0   61.62    3.88 
   0   6   0   71.01    4.24 
  -1  -6   0    2.29    0.65 
  -6   1   0    2.56    0.36 
  -1  -6   0    3.39    0.70 
  -6   1   0    1.66    0.27 
  -6   1   0    2.79    0.42 
   6  -1   0    1.86    0.33 
   6  -1   0    1.29    0.34 
   6  -1   0    1.93    0.35 
  -1  -6   0    0.89    0.50 
   6  -1   0    2.01    0.42 
   1   6   0    2.28    0.58 
  -6   1   0    1.66    0.27 
   1   6   0    3.60    0.70 
   1   6   0    2.56    0.50 
  -1  -6   0    2.23    0.63 
  -1  -6   0    1.85    0.52 
   1   6   0    1.83    0.58 
  -1  -6   0    1.89    0.48 
   6  -1   0    2.92    0.39 
   1   6   0    4.48    0.70 
   1   6   0    1.53    0.54 
   1   6   0    2.47    0.59 
  -1  -6   0    1.89    0.48 
  -6   1   0    1.85    0.32 
   1   6   0    2.50    0.65 
   1   6   0    1.31    0.53 
   6  -1   0    2.65    0.43 
  -1  -6   0    2.15    0.56 
  -6   1   0    2.13    0.40 
   6  -1   0    1.78    0.35 
   1   6   0    2.34    0.64 
  -6   1   0    2.49    0.44 
  -6   1   0    1.85    0.32 
  -1  -6   0    2.19    0.55 
   1   6   0    1.68    0.58 
   2   6   0  133.86    8.71 
   2   6   0  138.26    9.69 
  -6   2   0  126.44    9.43 
  -6   2   0  127.98    9.45 
  -2  -6   0  130.37    8.68 
   2   6   0  135.30    8.32 
   6  -2   0  128.58    8.25 
  -6   2   0  121.73    8.45 
  -2  -6   0  147.82    8.43 
  -6   2   0  139.61    8.47 
   2   6   0  125.04    9.20 
  -2  -6   0  129.99    9.65 
   2   6   0  131.96    9.60 
  -6   2   0  126.64    8.23 
   6  -2   0  126.19    7.95 
  -2  -6   0  130.63    9.68 
   6  -2   0  127.09    7.95 
   2   6   0  134.25    8.28 
   6  -2   0  131.81    8.94 
   6  -2   0  125.22    8.47 
   2   6   0  127.80    7.97 
  -2  -6   0  148.10    8.45 
  -2  -6   0  135.14    8.49 
  -2  -6   0  117.05    8.53 
  -2  -6   0  125.94    8.74 
  -2  -6   0  131.85    8.41 
   2   6   0  129.46    8.24 
   2   6   0  137.24    8.60 
  -6   2   0  138.41    8.20 
   2   6   0  111.83    8.64 
   6  -2   0  126.52    8.43 
  -6   2   0  138.45    8.21 
  -2  -6   0  126.03    9.07 
  -6   2   0  126.59    8.24 
   6  -2   0  127.58    8.50 
   6  -2   0  130.42    7.88 
   3   6   0  168.42   11.10 
   3   6   0  170.39   11.11 
  -3  -6   0  160.41   10.68 
  -3  -6   0  181.40   10.77 
   3   6   0  193.50   12.31 
  -3  -6   0  181.06   10.75 
   6  -3   0  167.16   10.30 
   3   6   0  166.55   10.57 
   3   6   0  156.31   10.18 
   3   6   0  142.31   11.66 
  -3  -6   0  170.08   11.16 
   3   6   0  171.87   10.52 
   3   6   0  168.91   12.30 
  -6   3   0  163.77   10.61 
   6  -3   0  165.79   10.30 
   6  -3   0  183.30   10.39 
  -6   3   0  146.09   12.15 
   6  -3   0  179.85   10.97 
  -6   3   0  158.01   12.14 
  -3  -6   0  179.72   11.63 
   6  -3   0  166.83   10.98 
   3   6   0  170.06   10.89 
   6  -3   0  160.76   10.50 
   3   6   0  180.13   10.51 
  -6   3   0  165.93   10.91 
   6  -3   0  159.70   11.50 
  -3  -6   0  171.03   10.95 
   3   6   0  164.18   10.52 
   6  -3   0  161.71   10.14 
  -6   3   0  163.28   10.64 
  -3  -6   0  179.64   12.36 
  -6   3   0  163.17   10.66 
  -3  -6   0  179.71   12.34 
  -6   3   0  163.87   10.59 
   6  -3   0  177.72   10.30 
   6  -4   0   61.39    4.68 
   4   6   0   61.30    4.16 
  -4  -6   0   68.96    4.42 
  -4  -6   0   63.16    5.07 
  -4  -6   0   66.03    4.49 
  -6   4   0   69.07    4.39 
   6  -4   0   66.88    4.53 
   4   6   0   60.74    4.83 
   4   6   0   61.99    4.35 
  -4  -6   0   58.04    4.55 
  -6   4   0   65.89    4.32 
  -6   4   0   65.90    4.32 
   6  -4   0   66.80    4.17 
   6  -4   0   61.06    4.23 
   4   6   0   64.68    4.33 
  -6   4   0   59.95    4.95 
  -4  -6   0   68.95    4.41 
   4   6   0   62.89    4.30 
   4   6   0   69.24    4.36 
   6  -4   0   67.42    4.25 
   6  -4   0   62.56    4.16 
  -6   4   0   62.57    5.00 
   6  -4   0   65.29    4.21 
  -4  -6   0   66.44    4.47 
  -4  -6   0   68.39    4.72 
   4   6   0   74.97    4.70 
   6  -4   0   57.53    4.19 
   6  -4   0   57.29    4.37 
  -4  -6   0   66.10    5.10 
  -6   4   0   66.28    4.53 
   4   6   0   67.55    4.58 
  -5  -6   0   35.91    2.86 
   6  -5   0   39.21    2.76 
   5   6   0   35.90    2.75 
  -6   5   0   42.37    3.30 
   5   6   0   37.84    3.13 
   5   6   0   42.90    2.88 
   5   6   0   39.28    2.91 
  -5  -6   0   39.90    2.85 
   5   6   0   36.13    2.98 
   5   6   0   39.19    2.75 
   6  -5   0   38.27    2.91 
   6  -5   0   39.38    3.05 
   6  -5   0   39.67    2.97 
   6  -5   0   40.07    2.71 
   5   6   0   35.36    2.74 
   6  -5   0   35.84    2.73 
   6  -5   0   40.70    2.76 
  -6   5   0   37.56    3.29 
  -5  -6   0   37.47    2.81 
  -5  -6   0   40.05    2.92 
  -6   5   0   39.48    3.00 
  -5  -6   0   37.57    2.81 
  -6   5   0   40.76    2.89 
   5   6   0   37.74    2.68 
  -5  -6   0   35.97    3.25 
   6  -5   0   39.02    2.72 
  -5  -6   0   39.94    3.26 
  -6  -6   0   41.06    2.94 
   6   6   0   41.67    2.84 
   6   6   0   38.89    2.96 
   6  -6   0   37.60    2.89 
  -6  -6   0   42.75    3.43 
  -6   6   0   38.63    3.15 
  -6  -6   0   38.81    2.96 
   6   6   0   41.60    3.24 
   6   6   0   34.40    2.78 
   6  -6   0   34.83    2.82 
  -6  -6   0   41.36    2.99 
  -6  -6   0   36.80    2.88 
   6  -6   0   36.87    2.84 
  -6   6   0   44.19    3.50 
   6   6   0   36.34    3.04 
   6  -6   0   42.74    3.23 
  -6  -6   0   52.15    3.52 
  -6  -6   0   36.82    2.88 
   6   6   0   36.47    2.75 
   6  -6   0   39.67    2.85 
   6  -6   0   41.19    2.93 
   6   6   0   41.60    2.92 
   6  -6   0   41.15    3.14 
  -7  -6   0   57.40    4.07 
   7   6   0   56.78    4.26 
  -7  -6   0   57.91    4.11 
   6  -7   0   57.03    4.04 
   6  -7   0   65.47    4.49 
   7   6   0   55.70    3.84 
  -6   7   0   56.85    4.42 
   7   6   0   61.11    4.17 
   7   6   0   63.14    4.53 
  -7  -6   0   57.45    4.08 
   6  -7   0   61.71    4.16 
   7   6   0   60.81    3.93 
   7   6   0   54.30    3.88 
  -7  -6   0   58.94    4.74 
   6  -7   0   53.89    4.01 
   6  -7   0   53.87    4.50 
  -7  -6   0   65.26    4.77 
   7   6   0   65.71    4.09 
   7   6   0   61.26    3.93 
   6  -7   0   52.71    4.03 
   6  -7   0   54.79    4.12 
  -7  -6   0   57.87    4.18 
  -7  -5   0    8.35    0.96 
   7   5   0    9.10    0.92 
  -5   7   0    8.18    1.20 
  -5   7   0   11.39    1.28 
   7   5   0    9.16    0.95 
   5  -7   0   10.24    1.18 
  -5   7   0   10.36    1.42 
   7   5   0   10.01    1.03 
   7   5   0   10.35    1.07 
  -7  -5   0    8.46    0.98 
   5  -7   0    9.84    1.28 
   7   5   0    9.74    1.16 
   5  -7   0    7.52    1.05 
   7   5   0    8.47    0.87 
   5  -7   0    8.54    1.23 
   7   5   0    9.66    0.92 
   5  -7   0    9.99    1.14 
   7   5   0   10.47    1.15 
   5  -7   0    9.46    1.27 
   5  -7   0   11.21    1.28 
  -7  -5   0    8.35    0.96 
   5  -7   0   10.03    1.20 
  -5   7   0   12.31    1.44 
   5  -7   0   10.71    1.07 
  -7  -5   0   10.41    1.24 
  -7  -5   0    9.61    1.18 
   7   4   0   26.08    2.31 
   4  -7   0   29.76    2.26 
   7   4   0   31.45    2.13 
   4  -7   0   28.88    2.53 
   7   4   0   27.19    1.97 
   7   4   0   26.60    2.11 
  -7  -4   0   23.82    2.39 
   7   4   0   28.75    1.88 
   4  -7   0   27.90    2.36 
  -7  -4   0   35.09    2.16 
   4  -7   0   28.91    2.04 
  -7  -4   0   31.67    2.11 
   4  -7   0   29.98    2.36 
   7   4   0   31.01    2.21 
   7   4   0   24.95    2.19 
  -7  -4   0   27.38    2.43 
   4  -7   0   26.65    2.45 
   7   4   0   26.47    1.97 
   4  -7   0   29.77    2.43 
  -4   7   0   29.14    2.65 
   4  -7   0   27.49    2.23 
   4  -7   0   34.26    2.33 
  -4   7   0   24.37    2.40 
   4  -7   0   29.90    2.27 
  -7  -4   0   31.68    2.11 
  -4   7   0   29.82    2.45 
  -4   7   0   30.86    2.45 
  -4   7   0   28.58    2.40 
   7   3   0   44.96    2.89 
   3  -7   0   40.85    3.16 
  -3   7   0   46.38    3.48 
  -3   7   0   45.99    3.75 
   3  -7   0   42.94    3.23 
   7   3   0   48.69    3.14 
  -3   7   0   49.09    3.58 
   3  -7   0   44.87    3.24 
  -7  -3   0   46.88    3.05 
   7   3   0   44.33    2.88 
   7   3   0   50.59    3.42 
   7   3   0   49.30    3.04 
   7   3   0   45.26    3.18 
  -7  -3   0   46.86    3.05 
   3  -7   0   43.05    3.25 
  -3   7   0   49.45    3.42 
   3  -7   0   40.34    3.30 
  -7  -3   0   45.69    3.06 
   3  -7   0   46.14    3.35 
  -3   7   0   45.52    3.45 
   3  -7   0   41.88    3.43 
  -3   7   0   47.86    3.44 
   3  -7   0   45.37    3.64 
  -7  -3   0   46.03    3.58 
  -7  -3   0   44.18    3.55 
   3  -7   0   49.06    3.59 
   7   3   0   44.05    3.21 
  -7  -2   0    0.63    0.24 
   7   2   0    0.33    0.31 
   7   2   0    0.78    0.38 
  -2   7   0    0.01    0.46 
   2  -7   0    0.27    0.42 
  -7  -2   0    0.73    0.24 
   2  -7   0    1.27    0.56 
  -2   7   0    0.74    0.46 
   2  -7   0    1.01    0.52 
   2  -7   0    1.25    0.48 
   2  -7   0    0.05    0.38 
  -7  -2   0    0.73    0.24 
   7   2   0    0.79    0.34 
   7   2   0    0.55    0.32 
   7   2   0    0.82    0.24 
  -7  -2   0    0.64    0.32 
  -2   7   0    0.74    0.53 
   2  -7   0    0.38    0.41 
  -2   7   0    0.29    0.45 
   2  -7   0    0.48    0.49 
   2  -7   0    0.67    0.47 
   2  -7   0    0.80    0.36 
  -2   7   0    0.47    0.49 
  -7  -2   0    0.22    0.31 
   2  -7   0   -0.06    0.35 
  -2   7   0    0.62    0.50 
  -1   7   0  165.30    9.75 
   7   1   0  168.41   10.22 
   1  -7   0  159.48   10.69 
   1  -7   0  156.06   10.18 
  -1   7   0  166.89   10.12 
  -7  -1   0  156.27    9.91 
   1  -7   0  169.73   10.10 
   1  -7   0  159.94   10.01 
  -7  -1   0  156.38    9.89 
  -7  -1   0  153.11   11.40 
  -1   7   0  155.15   10.18 
  -1   7   0  158.46   10.11 
  -7  -1   0  150.39   11.41 
   1  -7   0  164.70   10.64 
  -7  -1   0  161.67    9.92 
  -7  -1   0  161.80    9.91 
   7   1   0  147.08   10.20 
   1  -7   0  159.79   10.83 
   7   1   0  177.59   10.21 
   1  -7   0  152.64   10.27 
   7   1   0  159.12   10.79 
   1  -7   0  155.65   10.42 
   1  -7   0  162.90    9.81 
  -1   7   0  171.03   10.61 
  -1   7   0  152.46   10.61 
   1  -7   0  145.75   11.09 
  -1   7   0  155.28   11.29 
   7   0   0    0.88    0.34 
   7   0   0   -0.16    0.19 
   0   7   0   -0.16    0.43 
  -7   0   0    0.72    0.24 
   0   7   0    0.17    0.40 
   0   7   0    0.00    0.50 
   0  -7   0   -0.25    0.39 
   0   7   0   -0.11    0.34 
   0   7   0   -0.24    0.43 
   0  -7   0    1.70    0.53 
   0  -7   0   -0.13    0.38 
   7   0   0   -0.03    0.24 
  -7   0   0    0.34    0.18 
   0  -7   0    0.10    0.42 
   0  -7   0   -0.23    0.39 
  -7   0   0   -0.07    0.26 
   7   0   0    0.33    0.32 
  -7   0   0   -0.20    0.24 
   0   7   0    0.31    0.45 
  -7   0   0    0.34    0.18 
   0   7   0   -0.13    0.39 
   0  -7   0    0.73    0.48 
  -7   0   0    0.72    0.24 
   0   7   0    0.24    0.37 
   0  -7   0    0.40    0.48 
   7   0   0    0.07    0.27 
   0  -7   0    0.46    0.43 
   7  -1   0  155.67    9.28 
   7  -1   0  164.61    9.34 
  -7   1   0  165.26    9.69 
  -7   1   0  150.30   11.14 
   7  -1   0  167.06   10.55 
  -1  -7   0  142.97   10.78 
  -1  -7   0  156.11   11.49 
   1   7   0  138.17   10.94 
  -7   1   0  143.73    9.70 
  -1  -7   0  153.74   10.41 
   7  -1   0  162.86   10.00 
   7  -1   0  159.34    9.98 
  -1  -7   0  138.91    9.90 
   1   7   0  155.65    9.81 
   1   7   0  137.48    9.84 
  -7   1   0  143.56    9.72 
   7  -1   0  162.64    9.35 
   1   7   0  151.23    9.80 
   1   7   0  147.81   10.36 
  -1  -7   0  160.63    9.81 
   7  -1   0  138.90    9.77 
  -1  -7   0  153.38   10.18 
  -1  -7   0  149.51   10.04 
  -7   1   0  165.18    9.68 
   1   7   0  167.48   10.38 
  -1  -7   0  165.95   10.33 
  -7   1   0  167.68   11.19 
   7  -1   0  164.57   10.00 
   1   7   0  138.87   10.19 
  -7   1   0  161.05   11.15 
   2   7   0    1.27    0.49 
   7  -2   0    0.37    0.29 
  -2  -7   0    0.66    0.49 
   7  -2   0    0.18    0.48 
  -2  -7   0    0.16    0.41 
  -7   2   0    0.96    0.29 
  -7   2   0   -0.08    0.33 
   2   7   0    1.23    0.56 
  -2  -7   0    0.79    0.50 
   2   7   0    0.40    0.43 
  -7   2   0    0.96    0.29 
  -7   2   0    0.59    0.37 
   2   7   0    0.50    0.41 
   7  -2   0   -0.01    0.35 
  -2  -7   0    0.85    0.48 
   7  -2   0    0.53    0.30 
   7  -2   0    0.79    0.39 
  -2  -7   0    0.06    0.45 
   2   7   0    0.38    0.39 
   7  -2   0    0.49    0.39 
  -7   2   0    0.38    0.31 
   2   7   0    0.49    0.49 
   2   7   0    0.91    0.56 
   7  -2   0    2.02    0.39 
  -7   2   0    0.38    0.31 
  -2  -7   0    1.15    0.54 
  -7   2   0    0.08    0.30 
   2   7   0    0.12    0.46 
   2   7   0    0.53    0.45 
  -2  -7   0    0.26    0.46 
   7  -2   0    1.58    0.41 
  -2  -7   0    0.70    0.52 
  -3  -7   0   43.14    3.35 
   7  -3   0   42.97    3.22 
   7  -3   0   51.63    3.01 
   3   7   0   41.07    3.26 
  -7   3   0   52.89    3.33 
   3   7   0   46.19    3.12 
  -7   3   0   47.93    3.17 
  -3  -7   0   43.20    3.79 
  -7   3   0   45.04    3.61 
   3   7   0   43.42    3.38 
  -7   3   0   46.34    3.10 
   7  -3   0   39.29    3.35 
  -3  -7   0   48.07    3.40 
  -3  -7   0   43.43    3.36 
   3   7   0   35.73    3.58 
   7  -3   0   47.43    2.96 
   3   7   0   45.26    3.24 
  -7   3   0   41.73    3.60 
   3   7   0   47.41    3.30 
  -3  -7   0   47.61    3.50 
  -3  -7   0   45.15    3.52 
   3   7   0   40.50    3.25 
   7  -3   0   43.66    3.30 
  -3  -7   0   39.46    3.17 
   7  -3   0   43.36    2.99 
   3   7   0   49.36    3.32 
   7  -3   0   43.19    3.01 
  -7   3   0   47.91    3.18 
   7  -3   0   50.81    3.06 
   7  -3   0   47.88    3.24 
   3   7   0   53.09    3.60 
  -7   3   0   46.33    3.09 
  -7   4   0   31.28    2.22 
  -4  -7   0   29.49    2.35 
   7  -4   0   29.46    2.18 
   4   7   0   27.60    2.33 
   4   7   0   27.25    2.38 
  -4  -7   0   29.55    2.35 
  -4  -7   0   30.01    2.74 
   7  -4   0   29.78    2.41 
   4   7   0   27.39    2.60 
   4   7   0   28.20    2.29 
   7  -4   0   29.05    2.16 
  -7   4   0   29.73    2.39 
   7  -4   0   28.31    2.09 
   4   7   0   30.53    2.36 
   4   7   0   31.70    2.24 
  -4  -7   0   28.35    2.38 
   7  -4   0   33.19    2.16 
  -7   4   0   30.79    2.61 
  -7   4   0   33.13    2.28 
   7  -4   0   33.06    2.21 
   4   7   0   27.23    2.31 
  -4  -7   0   26.08    2.37 
   4   7   0   29.22    2.51 
   7  -4   0   27.05    2.37 
   7  -4   0   27.85    2.30 
  -7   4   0   30.07    2.59 
  -7   4   0   31.27    2.22 
   5   7   0    8.05    1.22 
  -7   5   0   10.62    1.25 
   5   7   0    9.64    1.18 
   5   7   0    9.61    1.09 
   5   7   0   11.78    1.20 
   5   7   0    8.22    1.09 
   5   7   0    9.47    1.14 
  -7   5   0    8.91    1.25 
  -5  -7   0   10.82    1.35 
  -5  -7   0    9.77    1.12 
   7  -5   0    8.98    0.97 
   5   7   0    7.23    0.99 
   7  -5   0    9.86    1.32 
   7  -5   0   10.19    1.10 
  -5  -7   0    9.24    1.22 
   5   7   0    9.20    1.30 
   7  -5   0   11.43    1.20 
   7  -5   0    8.39    1.13 
  -5  -7   0    9.78    1.16 
  -7   5   0   10.27    1.14 
   7  -5   0    9.81    1.10 
   7  -5   0    9.08    0.98 
   7  -5   0    9.85    1.10 
  -5  -7   0    9.77    1.12 
  -7   6   0   59.18    4.39 
   6   7   0   57.44    4.04 
   7  -6   0   58.18    4.50 
  -6  -7   0   61.88    4.18 
   6   7   0   59.72    4.14 
   6   7   0   66.83    4.04 
  -6  -7   0   63.59    4.85 
  -6  -7   0   57.74    4.17 
   7  -6   0   59.36    3.95 
   7  -6   0   58.18    4.32 
   6   7   0   57.96    4.02 
   7  -6   0   51.32    3.99 
   7  -6   0   52.92    3.96 
   6   7   0   55.63    4.33 
  -6  -7   0   61.13    4.25 
   6   7   0   52.67    4.53 
   7  -6   0   54.89    3.99 
   7  -6   0   66.54    4.31 
  -6  -7   0   61.88    4.19 
   6   7   0   55.02    4.22 
  -7  -7   0  192.37   12.28 
   7   7   0  182.38   11.87 
  -7  -7   0  201.95   12.49 
   7   7   0  179.65   11.76 
   7  -7   0  185.56   12.73 
  -7  -7   0  192.41   12.26 
   7  -7   0  178.88   11.72 
  -7   7   0  189.48   12.74 
   7  -7   0  191.27   11.87 
   7   7   0  198.48   11.79 
   7   7   0  182.37   12.53 
   7  -7   0  194.27   11.99 
   7  -7   0  194.11   11.93 
   7  -7   0  181.33   13.30 
   7   7   0  190.02   11.96 
   7   7   0  189.84   11.80 
   7   7   0  192.00   12.61 
   7   7   0  204.63   13.40 
   8   7   0    7.30    0.96 
  -8  -7   0    7.48    1.11 
   7  -8   0    9.17    1.29 
   8   7   0    7.81    1.27 
   7  -8   0    8.88    1.24 
  -7   8   0    8.58    1.44 
   7  -8   0    6.59    1.05 
   8   7   0    8.24    1.03 
   8   7   0    7.44    1.03 
   7  -8   0    8.75    1.16 
   7  -8   0    7.12    1.29 
   8   7   0    9.23    1.24 
   7  -8   0    6.80    1.25 
   8   7   0    8.83    1.17 
   8   7   0    9.15    0.89 
  -8  -7   0    7.48    1.11 
   6  -8   0   33.49    2.96 
   6  -8   0   36.09    3.18 
   6  -8   0   41.30    3.09 
   6  -8   0   38.01    3.28 
   8   6   0   41.64    2.89 
  -6   8   0   35.50    3.25 
  -8  -6   0   37.70    2.87 
  -8  -6   0   37.69    2.88 
   6  -8   0   38.64    2.93 
   8   6   0   32.74    2.93 
   8   6   0   40.55    2.87 
   8   6   0   42.30    2.68 
   6  -8   0   37.25    2.94 
   8   6   0   40.85    3.18 
   6  -8   0   37.83    3.00 
   8   6   0   36.89    2.66 
  -8  -5   0   19.58    1.97 
  -8  -5   0   22.59    1.72 
   8   5   0   19.74    1.78 
  -5   8   0   17.91    2.05 
   5  -8   0   16.57    1.77 
   5  -8   0   21.78    2.02 
   8   5   0   21.26    1.87 
   5  -8   0   18.86    1.97 
   5  -8   0   22.16    1.95 
  -8  -5   0   22.02    1.72 
   8   5   0   19.26    1.48 
   5  -8   0   20.64    1.94 
  -8  -5   0   22.59    1.72 
   5  -8   0   19.75    1.78 
   8   5   0   17.42    1.65 
  -5   8   0   21.31    2.03 
   8   5   0   19.43    1.49 
   8   5   0   22.62    1.68 
   5  -8   0   16.43    1.94 
   5  -8   0   19.75    2.01 
   5  -8   0   19.83    1.84 
   8   4   0  179.18   11.12 
   4  -8   0  193.79   12.46 
   8   4   0  177.08   11.11 
   8   4   0  186.96   11.95 
   4  -8   0  173.47   12.43 
  -4   8   0  197.17   12.46 
  -4   8   0  185.44   13.18 
  -8  -4   0  170.32   11.67 
   8   4   0  178.01   11.99 
   4  -8   0  172.46   11.85 
   8   4   0  204.01   11.40 
  -8  -4   0  214.66   13.47 
   4  -8   0  195.01   11.52 
   4  -8   0  174.14   11.69 
   4  -8   0  160.25   12.91 
   4  -8   0  179.48   11.75 
   4  -8   0  187.60   12.08 
  -8  -4   0  200.97   11.72 
   8   4   0  207.31   12.74 
  -8  -4   0  190.14   13.41 
  -4   8   0  159.33   12.29 
  -4   8   0  172.26   11.87 
  -8  -4   0  200.95   11.73 
   4  -8   0  171.08   11.61 
   3  -8   0   20.92    2.03 
  -3   8   0   24.21    2.21 
   3  -8   0   23.61    2.00 
  -8  -3   0   24.43    1.98 
  -3   8   0   18.03    2.02 
  -3   8   0   26.06    2.24 
   3  -8   0   21.41    1.97 
   8   3   0   25.50    1.90 
  -8  -3   0   22.69    1.68 
   3  -8   0   18.38    1.89 
   3  -8   0   24.49    2.20 
  -8  -3   0   22.68    1.68 
   8   3   0   25.10    1.83 
  -3   8   0   17.05    2.01 
  -8  -3   0   23.27    2.01 
   3  -8   0   20.85    2.13 
   3  -8   0   21.30    2.06 
  -3   8   0   21.90    2.07 
   8   3   0   22.86    1.77 
   8   3   0   24.37    1.62 
   8   3   0   20.49    1.66 
   3  -8   0   20.74    1.81 
  -3   8   0   26.48    2.39 
   3  -8   0   21.70    1.97 
  -8  -3   0   22.13    1.68 
   2  -8   0    0.89    0.52 
   2  -8   0    0.77    0.56 
   8   2   0    0.32    0.35 
   2  -8   0    1.12    0.56 
   8   2   0    0.77    0.35 
   2  -8   0    2.14    0.66 
   2  -8   0    0.80    0.49 
  -8  -2   0    0.77    0.30 
  -2   8   0    1.20    0.61 
  -8  -2   0    0.21    0.26 
  -8  -2   0    0.32    0.34 
  -2   8   0    1.28    0.67 
  -2   8   0   -0.26    0.47 
   2  -8   0    0.80    0.61 
   8   2   0    0.63    0.35 
  -2   8   0    1.03    0.53 
  -8  -2   0    0.85    0.40 
   2  -8   0    1.75    0.64 
  -2   8   0    0.38    0.47 
   2  -8   0    0.77    0.51 
  -2   8   0    0.06    0.48 
  -2   8   0   -0.11    0.46 
  -8  -2   0    0.77    0.30 
   8   2   0    0.56    0.33 
   2  -8   0    0.90    0.51 
   1  -8   0   18.58    1.70 
  -1   8   0   24.63    1.97 
  -8  -1   0   18.52    1.34 
  -1   8   0   18.84    1.65 
   1  -8   0   19.01    1.88 
   1  -8   0   17.20    1.69 
   1  -8   0   21.26    1.70 
  -1   8   0   20.19    1.87 
   1  -8   0   16.16    1.70 
   8   1   0   18.89    1.46 
  -1   8   0   18.41    1.78 
   8   1   0   21.08    1.54 
   1  -8   0   22.22    1.83 
  -1   8   0   18.30    1.88 
  -8  -1   0   17.60    1.36 
  -8  -1   0   17.91    1.62 
  -8  -1   0   17.59    1.36 
  -1   8   0   21.73    1.88 
   1  -8   0   25.08    1.82 
   1  -8   0   16.47    1.83 
   1  -8   0   18.06    1.73 
  -1   8   0   17.55    1.98 
   8   1   0   17.66    1.48 
   1  -8   0   17.17    1.77 
  -8  -1   0   17.95    1.62 
   0  -8   0  106.73    6.88 
   0  -8   0   92.37    6.98 
   8   0   0  109.07    7.03 
  -8   0   0  107.65    6.44 
   0   8   0   98.97    6.74 
   0  -8   0   97.02    6.92 
   0   8   0  105.99    6.88 
   8   0   0  104.18    6.66 
   0  -8   0  105.53    6.71 
  -8   0   0   98.15    6.46 
  -8   0   0   98.12    6.47 
   8   0   0   95.52    6.18 
   0  -8   0  106.49    7.45 
  -8   0   0   95.65    7.40 
   0  -8   0   95.79    7.13 
   8   0   0   98.51    6.64 
   0   8   0  102.50    7.07 
   0   8   0   94.86    6.76 
  -8   0   0  107.62    6.43 
   0   8   0   93.83    6.45 
   0   8   0  103.01    7.64 
  -8   0   0  107.65    7.48 
   0  -8   0  107.17    6.75 
   0  -8   0  116.33    6.85 
   0   8   0   94.93    7.04 
   0  -8   0  105.62    6.53 
   1   8   0   20.00    1.83 
  -1  -8   0   19.62    1.84 
  -1  -8   0   21.64    1.79 
  -1  -8   0   20.80    1.74 
   1   8   0   21.01    2.13 
  -1  -8   0   21.43    1.95 
  -8   1   0   17.42    1.45 
  -8   1   0   18.20    1.39 
   1   8   0   18.58    1.83 
   8  -1   0   19.60    1.59 
   1   8   0   18.90    1.98 
   1   8   0   19.57    1.80 
   8  -1   0   17.75    1.82 
  -8   1   0   18.21    1.39 
  -1  -8   0   17.99    1.79 
   1   8   0   21.46    1.72 
  -1  -8   0   17.73    1.77 
  -1  -8   0   21.74    1.80 
   8  -1   0   17.58    1.43 
  -1  -8   0   18.64    1.72 
   1   8   0   17.21    1.75 
  -8   1   0   20.99    1.73 
  -8   1   0   18.92    1.69 
   8  -1   0   21.76    1.42 
   8  -1   0   18.57    1.54 
   1   8   0   18.44    1.82 
  -8   1   0   17.41    1.44 
   8  -1   0   18.98    1.56 
  -1  -8   0   19.91    1.93 
   8  -2   0    1.14    0.64 
   2   8   0    1.52    0.58 
   8  -2   0    0.46    0.32 
   2   8   0   -0.19    0.38 
  -2  -8   0    0.70    0.53 
  -8   2   0    0.90    0.41 
  -2  -8   0    0.55    0.47 
  -8   2   0    1.40    0.45 
  -2  -8   0    0.44    0.46 
   8  -2   0    0.96    0.43 
  -2  -8   0    0.72    0.58 
   8  -2   0    1.21    0.45 
  -8   2   0   -0.15    0.29 
   8  -2   0    0.18    0.25 
  -2  -8   0    0.18    0.51 
   8  -2   0    0.29    0.36 
   2   8   0    0.13    0.52 
  -2  -8   0    0.23    0.37 
  -8   2   0   -0.15    0.29 
   8  -2   0    0.14    0.28 
  -2  -8   0    0.71    0.52 
   2   8   0    1.07    0.63 
   2   8   0    0.47    0.49 
  -8   2   0    0.14    0.29 
   2   8   0    0.27    0.52 
  -8   2   0    0.14    0.29 
   8  -2   0    0.76    0.38 
   2   8   0    1.26    0.54 
   2   8   0    1.34    0.55 
   8  -3   0   22.61    1.56 
   3   8   0   21.46    2.01 
   3   8   0   23.35    2.03 
  -8   3   0   22.82    1.80 
   3   8   0   24.94    2.00 
  -8   3   0   22.50    2.02 
   3   8   0   21.68    2.00 
  -8   3   0   21.34    1.71 
   8  -3   0   24.53    1.70 
  -8   3   0   21.36    1.71 
   8  -3   0   20.51    1.64 
   3   8   0   20.62    2.23 
   3   8   0   24.38    2.24 
   8  -3   0   23.03    1.76 
  -8   3   0   22.81    1.80 
   8  -3   0   23.61    1.92 
   3   8   0   20.80    1.96 
   3   8   0   21.87    1.86 
   8  -3   0   21.12    2.05 
  -3  -8   0   21.36    2.07 
   8  -3   0   24.39    1.81 
  -8   3   0   24.01    2.10 
   3   8   0   21.01    1.96 
   8  -3   0   21.27    1.83 
  -3  -8   0   19.52    1.95 
  -3  -8   0   25.10    2.16 
  -3  -8   0   25.30    2.19 
  -3  -8   0   22.80    1.94 
  -3  -8   0   23.17    2.02 
   8  -4   0  196.18   12.89 
  -8   4   0  190.15   12.25 
   4   8   0  182.28   11.74 
   4   8   0  161.46   13.14 
   4   8   0  173.95   12.42 
   8  -4   0  185.21   11.41 
  -8   4   0  195.14   13.64 
   8  -4   0  175.19   12.13 
  -4  -8   0  199.74   12.04 
   4   8   0  191.33   12.51 
   8  -4   0  180.98   11.44 
   4   8   0  168.34   11.39 
   4   8   0  173.03   11.83 
  -4  -8   0  202.64   12.50 
   8  -4   0  198.64   11.53 
  -4  -8   0  181.89   12.28 
   8  -4   0  194.00   12.26 
  -8   4   0  207.89   11.91 
   4   8   0  180.36   11.81 
   8  -4   0  178.04   11.42 
   4   8   0  185.96   11.75 
  -8   4   0  170.17   13.59 
   8  -4   0  180.03   11.33 
  -8   4   0  198.32   11.95 
   8  -4   0  188.79   11.85 
  -8   4   0  207.56   11.89 
   8  -5   0   16.98    1.73 
  -8   5   0   17.16    1.72 
  -8   5   0   20.39    2.04 
   8  -5   0   18.94    1.70 
   5   8   0   18.78    1.85 
   8  -5   0   18.90    1.84 
   5   8   0   19.05    1.78 
   5   8   0   17.89    1.78 
   8  -5   0   18.34    1.56 
   8  -5   0   19.45    1.81 
   8  -5   0   20.35    1.69 
   5   8   0   21.74    2.07 
   8  -5   0   18.92    1.60 
   5   8   0   18.12    1.81 
   5   8   0   21.64    1.75 
   8  -5   0   21.98    1.75 
   8  -5   0   21.01    2.03 
   5   8   0   22.55    1.93 
  -8   5   0   17.03    1.85 
  -5  -8   0   19.48    1.88 
  -5  -8   0   23.48    2.00 
   5   8   0   20.34    2.13 
   8  -6   0   36.79    3.08 
   6   8   0   35.95    2.99 
  -6  -8   0   39.91    3.04 
   8  -6   0   36.43    2.98 
   8  -6   0   37.15    2.80 
   6   8   0   32.28    2.78 
   6   8   0   35.89    3.12 
   8  -6   0   35.42    2.96 
  -8   6   0   36.91    3.12 
   8  -6   0   34.97    2.80 
   6   8   0   42.99    2.97 
   6   8   0   35.33    2.85 
   8  -6   0   38.10    2.74 
   6   8   0   38.86    2.99 
   8  -6   0   38.49    2.74 
   6   8   0   37.81    3.33 
   8  -6   0   39.66    3.16 
  -6  -8   0   40.17    3.05 
   8  -7   0   10.76    1.30 
   8  -7   0    6.64    1.02 
   7   8   0    7.80    1.31 
   7   8   0    8.22    1.08 
   8  -7   0    6.37    1.00 
   8  -7   0    6.83    1.18 
   8  -7   0    9.04    1.29 
   7   8   0    6.56    1.15 
   8  -7   0    7.79    1.17 
  -7  -8   0    9.84    1.27 
   7   8   0    6.49    1.07 
   7   8   0    8.19    1.05 
   7   8   0    9.58    1.45 
  -8   7   0   10.02    1.43 
   7   8   0    9.94    1.21 
   8   8   0    0.73    0.50 
   8  -8   0    0.27    0.54 
   8   8   0   -0.09    0.53 
   8   8   0    0.04    0.53 
   8   8   0    0.67    0.60 
   8  -8   0   -0.16    0.64 
  -8   8   0    0.45    0.75 
   8  -8   0    0.60    0.56 
   8  -8   0    1.12    0.72 
   8   8   0    1.01    0.75 
   8   8   0    0.99    0.63 
   8  -8   0    0.75    0.66 
   8   8   0    1.24    0.57 
   8  -8   0   -0.08    0.62 
   9   8   0    5.92    1.14 
  -8   9   0    3.97    1.25 
   9   8   0    4.31    1.08 
   9   8   0    3.66    0.70 
   8  -9   0    3.09    0.89 
   8  -9   0    4.53    0.99 
   8  -9   0    5.06    1.14 
   9   8   0    3.69    0.90 
   9   8   0    5.67    0.80 
   8  -9   0    3.14    1.00 
  -9  -7   0   37.44    3.05 
   9   7   0   40.42    3.35 
   7  -9   0   33.92    3.06 
   7  -9   0   38.60    3.04 
   7  -9   0   35.97    3.43 
   9   7   0   43.91    3.04 
  -7   9   0   33.90    3.39 
   9   7   0   38.19    3.13 
   7  -9   0   44.64    3.13 
   9   7   0   39.24    2.66 
   9   7   0   36.97    2.64 
  -9  -7   0   37.50    3.04 
   7  -9   0   43.26    3.25 
   7  -9   0   38.96    3.40 
  -9  -6   0   54.97    4.16 
  -6   9   0   62.30    4.77 
   6  -9   0   60.42    4.66 
   9   6   0   65.64    4.35 
   9   6   0   60.55    4.09 
   9   6   0   59.72    3.73 
   6  -9   0   56.74    4.26 
   6  -9   0   62.66    4.28 
   6  -9   0   53.10    4.25 
   6  -9   0   49.84    4.29 
   9   6   0   57.87    3.73 
  -9  -6   0   54.91    4.17 
   9   6   0   63.15    4.57 
   6  -9   0   63.11    4.83 
   9   5   0   18.04    1.50 
  -9  -5   0   15.91    1.47 
  -9  -5   0   15.59    1.51 
  -5   9   0   11.92    1.84 
   9   5   0   14.75    1.51 
   5  -9   0   17.69    1.89 
   5  -9   0   16.98    1.88 
   5  -9   0   18.61    1.95 
   5  -9   0   18.07    1.97 
   5  -9   0   18.67    1.68 
   5  -9   0   16.97    1.75 
   5  -9   0   13.73    1.71 
  -9  -5   0   15.89    1.47 
   5  -9   0   15.54    1.70 
   4  -9   0    8.50    0.92 
  -4   9   0   11.13    1.38 
   9   4   0    9.01    1.01 
   4  -9   0    8.06    1.27 
  -4   9   0    7.22    1.45 
  -4   9   0    9.79    1.43 
   4  -9   0    8.77    1.22 
   4  -9   0    9.19    1.41 
  -9  -4   0    7.87    0.92 
  -4   9   0    8.22    1.41 
   4  -9   0   10.13    1.33 
  -9  -4   0    7.58    0.93 
   4  -9   0    8.72    1.16 
  -9  -4   0    7.87    0.93 
   4  -9   0    8.75    1.23 
   4  -9   0    9.33    1.40 
   4  -9   0    9.22    1.39 
   3  -9   0  163.85   10.50 
  -3   9   0  182.31   11.14 
  -9  -3   0  155.51   10.26 
  -9  -3   0  155.51   10.25 
   3  -9   0  162.90   10.20 
   3  -9   0  161.04   11.03 
   3  -9   0  161.62   10.37 
   3  -9   0  148.33   10.38 
  -9  -3   0  162.75   10.28 
  -3   9   0  166.09   10.67 
  -3   9   0  162.73   11.02 
  -3   9   0  154.27   10.50 
   3  -9   0  147.71   11.05 
   3  -9   0  165.75   11.59 
   9   3   0  155.39   10.47 
   3  -9   0  163.35   10.78 
  -3   9   0  181.57   10.69 
   3  -9   0  158.72   10.59 
   9   3   0  176.58   10.50 
  -3   9   0  160.36   11.75 
   2  -9   0   16.52    1.68 
   2  -9   0   17.04    1.68 
  -2   9   0   17.50    1.58 
  -2   9   0   14.75    1.92 
   2  -9   0   15.17    1.73 
  -9  -2   0   14.07    1.21 
  -2   9   0   15.16    1.78 
   9   2   0   16.52    1.30 
   2  -9   0   16.81    1.68 
  -2   9   0   13.80    1.75 
   2  -9   0   13.60    1.74 
   2  -9   0   16.32    1.62 
   9   2   0   15.03    1.29 
  -2   9   0   16.58    1.85 
  -9  -2   0   13.37    1.19 
   2  -9   0   16.68    1.62 
  -9  -2   0   14.07    1.21 
  -2   9   0   13.58    1.63 
  -2   9   0   16.05    1.79 
   2  -9   0   14.97    1.77 
   2  -9   0   14.69    1.45 
   1  -9   0    2.11    0.74 
  -1   9   0    2.21    0.86 
  -1   9   0    3.44    0.92 
   1  -9   0    2.25    0.78 
   1  -9   0    2.62    0.70 
  -9  -1   0    2.12    0.39 
   1  -9   0    3.57    0.82 
   9   1   0    3.22    0.51 
  -1   9   0    0.97    0.70 
  -1   9   0    2.12    0.71 
  -9  -1   0    1.98    0.41 
  -1   9   0    3.45    0.76 
  -9  -1   0    1.98    0.41 
   1  -9   0    1.64    0.72 
   1  -9   0    0.22    0.57 
   1  -9   0    2.97    0.75 
  -1   9   0    2.30    0.81 
   9   1   0    2.38    0.44 
   1  -9   0    2.04    0.73 
  -1   9   0    1.88    0.80 
   9   1   0    2.52    0.50 
   1  -9   0    1.25    0.63 
   0  -9   0    0.79    0.59 
  -9   0   0    0.09    0.27 
   9   0   0    0.88    0.38 
   0  -9   0    0.18    0.49 
   0  -9   0    0.17    0.53 
   0   9   0   -0.55    0.39 
  -9   0   0    0.43    0.29 
   0  -9   0    1.88    0.72 
  -9   0   0    0.43    0.29 
   0   9   0    0.60    0.59 
  -9   0   0    0.09    0.27 
   9   0   0    1.01    0.40 
  -9   0   0   -0.41    0.27 
   0  -9   0   -0.25    0.44 
   0  -9   0    0.58    0.49 
   0  -9   0    1.02    0.54 
   0  -9   0   -0.49    0.40 
   0   9   0    0.79    0.60 
   0   9   0   -0.38    0.36 
   0  -9   0   -0.41    0.49 
   0   9   0   -0.35    0.44 
   0  -9   0   -0.02    0.50 
   0   9   0   -0.49    0.46 
   0   9   0   -0.24    0.43 
   9   0   0    0.06    0.31 
  -9   1   0    2.70    0.45 
   1   9   0    1.72    0.74 
  -9   1   0    2.18    0.52 
   9  -1   0    2.42    0.51 
  -1  -9   0    3.47    0.87 
  -9   1   0    2.30    0.49 
  -9   1   0    2.70    0.45 
  -1  -9   0    3.27    0.77 
  -1  -9   0    2.51    0.76 
  -1  -9   0    1.07    0.62 
   1   9   0    1.99    0.81 
   1   9   0    2.13    0.79 
  -1  -9   0    4.17    0.99 
   1   9   0    1.98    0.73 
   9  -1   0    2.02    0.51 
   9  -1   0    3.15    0.59 
  -1  -9   0    2.56    0.74 
   1   9   0    1.84    0.74 
   9  -1   0    2.90    0.51 
   9  -1   0    3.07    0.96 
  -1  -9   0    2.64    0.74 
   1   9   0    2.36    0.77 
   1   9   0    2.16    0.68 
  -1  -9   0    1.98    0.76 
  -9   1   0    2.30    0.49 
  -9   2   0   15.72    1.36 
   9  -2   0   15.53    1.40 
   9  -2   0   13.50    1.36 
   2   9   0   16.88    1.71 
  -9   2   0   15.66    1.30 
   2   9   0   19.85    2.05 
   2   9   0   11.99    1.64 
   2   9   0   14.90    1.97 
  -2  -9   0   18.02    1.84 
  -9   2   0   15.73    1.36 
   9  -2   0   14.67    1.68 
   9  -2   0   16.36    1.35 
  -2  -9   0   14.99    1.63 
  -2  -9   0   15.13    1.79 
  -2  -9   0   16.70    1.75 
  -2  -9   0   14.59    1.58 
  -2  -9   0   15.61    1.63 
  -9   2   0   15.47    1.55 
   2   9   0   15.54    1.55 
  -2  -9   0   14.28    1.65 
   2   9   0   14.10    1.62 
   2   9   0   16.29    1.75 
   2   9   0   15.04    1.69 
  -9   2   0   15.65    1.31 
   9  -3   0  166.89   10.08 
  -9   3   0  164.66   10.67 
   3   9   0  156.77   11.30 
   3   9   0  163.30   10.65 
  -9   3   0  164.77   10.65 
  -3  -9   0  177.16   11.21 
   9  -3   0  162.14   10.08 
  -9   3   0  155.38   10.54 
   9  -3   0  173.38   11.47 
   3   9   0  165.15   10.99 
  -3  -9   0  169.90   10.87 
   9  -3   0  185.92   10.85 
   3   9   0  192.23   12.19 
   9  -3   0  159.72   10.67 
   3   9   0  166.64   10.79 
  -3  -9   0  171.01   11.12 
   3   9   0  157.53   10.31 
  -9   3   0  182.06   12.15 
   9  -3   0  163.97   10.10 
   3   9   0  159.89   10.68 
  -9   3   0  155.31   10.56 
   9  -3   0  150.29   10.80 
   3   9   0  159.22   11.21 
   4   9   0    9.56    1.49 
  -9   4   0   10.12    1.11 
   9  -4   0    8.18    1.09 
  -9   4   0   10.17    1.07 
   9  -4   0   10.19    1.16 
   4   9   0    8.82    1.54 
  -4  -9   0    9.87    1.34 
   9  -4   0    8.71    1.03 
   4   9   0    7.03    1.22 
  -9   4   0   10.16    1.07 
   4   9   0    6.53    1.21 
   4   9   0    8.05    1.24 
   4   9   0   11.27    1.42 
   9  -4   0    8.94    0.95 
   4   9   0    7.99    1.32 
   9  -4   0    9.91    1.08 
   9  -4   0    9.13    0.95 
  -4  -9   0   10.43    1.43 
   9  -4   0    9.04    1.41 
   4   9   0   10.31    1.23 
  -5  -9   0   18.67    1.85 
   5   9   0   15.18    1.62 
   9  -5   0   17.98    1.39 
   5   9   0   13.80    1.71 
  -5  -9   0   14.38    1.79 
   5   9   0   17.18    1.85 
   5   9   0   17.33    2.01 
   9  -5   0   16.00    1.49 
   9  -5   0   15.33    1.52 
   9  -5   0   18.45    1.99 
   9  -5   0   17.48    1.64 
   9  -5   0   19.90    1.79 
  -9   5   0   16.63    1.67 
   5   9   0   15.39    1.72 
   5   9   0   17.02    1.80 
   9  -5   0   16.70    1.69 
   5   9   0   17.07    1.82 
   5   9   0   19.87    2.22 
   9  -5   0   16.28    1.60 
   9  -6   0   64.55    4.62 
   6   9   0   59.40    4.75 
   6   9   0   58.54    4.36 
   6   9   0   60.71    4.45 
   6   9   0   58.48    4.36 
  -6  -9   0   63.58    4.56 
   6   9   0   60.78    4.59 
   9  -6   0   63.25    4.24 
   6   9   0   67.17    4.39 
   9  -6   0   62.24    4.49 
   9  -6   0   58.77    4.04 
   9  -6   0   64.57    4.19 
  -6  -9   0   62.52    4.61 
   6   9   0   54.59    4.97 
   9  -6   0   56.35    4.10 
   9  -6   0   56.56    4.70 
   9  -6   0   64.37    4.54 
   9  -7   0   41.46    3.04 
   7   9   0   38.12    3.13 
   9  -7   0   38.80    2.87 
   9  -7   0   38.99    3.28 
   9  -7   0   39.11    3.40 
   7   9   0   40.28    3.03 
   9  -7   0   36.56    3.18 
  -9   7   0   38.47    3.40 
   9  -7   0   40.20    3.07 
   7   9   0   41.45    3.26 
   7   9   0   38.25    3.06 
   7   9   0   34.44    2.94 
   7   9   0   44.51    3.71 
   9  -7   0   38.52    2.92 
   7   9   0   43.82    3.49 
  -7  -9   0   36.80    3.24 
   9  -8   0    7.24    1.02 
   8   9   0    4.52    1.20 
   9  -8   0    3.81    0.98 
   9  -8   0    3.17    0.92 
   9  -8   0    1.78    0.85 
   8   9   0    5.72    1.03 
   9  -8   0    4.58    0.96 
   8   9   0    7.16    1.33 
   8   9   0    6.21    0.88 
   9  -8   0    3.69    1.04 
   8   9   0    3.88    0.99 
  -9   8   0    6.72    1.44 
   8   9   0    3.94    0.88 
   9  -8   0    5.06    1.14 
   9  -9   0    0.09    0.61 
   9  -9   0    0.22    0.68 
   9  -9   0    0.30    0.64 
   9   9   0    0.90    0.72 
   9   9   0    0.05    0.49 
   9  -9   0    0.15    0.72 
   9   9   0    0.81    0.56 
   9  -9   0    0.93    0.73 
   9   9   0    0.44    0.65 
  -9   9   0   -0.49    0.74 
   9 -10   0    2.52    0.91 
   9 -10   0    3.37    1.10 
  -9  10   0    3.21    1.24 
   9 -10   0    4.36    1.18 
   9 -10   0    2.24    0.84 
  10   9   0    3.83    0.99 
   9 -10   0    2.01    0.94 
  10   9   0    2.75    0.98 
  10   8   0   57.17    4.00 
   8 -10   0   52.11    4.21 
  -8  10   0   55.50    4.68 
   8 -10   0   55.47    4.03 
   8 -10   0   55.14    4.17 
   8 -10   0   53.48    4.08 
  10   8   0   52.82    4.18 
   8 -10   0   51.39    4.42 
  10   7   0    0.41    0.56 
  -7  10   0   -0.17    0.80 
  10   7   0   -0.58    0.45 
   7 -10   0    0.57    0.66 
 -10  -7   0    0.25    0.52 
   7 -10   0    0.72    0.63 
 -10  -7   0    0.25    0.52 
   7 -10   0    1.00    0.77 
   6 -10   0   18.34    2.05 
   6 -10   0   19.55    2.06 
   6 -10   0   18.93    1.95 
  10   6   0   20.42    1.76 
  -6  10   0   18.55    2.30 
   6 -10   0   16.48    2.13 
   6 -10   0   17.30    2.17 
   6 -10   0   17.39    1.94 
 -10  -6   0   17.94    1.74 
 -10  -6   0   17.95    1.74 
 -10  -5   0    2.69    0.69 
 -10  -5   0    2.43    0.65 
  10   5   0    0.93    0.52 
   5 -10   0    2.57    0.83 
   5 -10   0    1.60    0.81 
   5 -10   0    2.12    0.92 
  -5  10   0    1.36    0.89 
   5 -10   0    1.49    0.81 
   5 -10   0    0.51    0.70 
  -5  10   0    1.50    0.93 
 -10  -5   0    2.43    0.65 
   5 -10   0    2.44    0.92 
   5 -10   0    1.19    0.80 
  -4  10   0    0.12    0.71 
   4 -10   0    0.66    0.62 
   4 -10   0    1.16    0.65 
   4 -10   0    0.59    0.74 
  10   4   0    1.38    0.49 
   4 -10   0    1.28    0.71 
   4 -10   0    0.23    0.64 
   4 -10   0    0.83    0.78 
   4 -10   0    0.74    0.46 
   4 -10   0    0.85    0.66 
 -10  -4   0    0.61    0.49 
  -4  10   0   -0.11    0.57 
   4 -10   0    1.47    0.75 
 -10  -4   0    1.02    0.46 
 -10  -4   0    1.03    0.46 
  -3  10   0    4.23    1.10 
  -3  10   0    8.10    1.43 
   3 -10   0    6.73    1.34 
 -10  -3   0    5.39    0.77 
   3 -10   0    3.70    0.99 
 -10  -3   0    5.01    0.74 
  10   3   0    5.48    0.72 
   3 -10   0    5.96    1.10 
   3 -10   0    6.05    1.25 
  10   3   0    5.69    0.73 
   3 -10   0    3.19    0.80 
  -3  10   0    7.09    1.32 
 -10  -3   0    5.01    0.74 
   3 -10   0    5.67    1.16 
  -3  10   0    4.96    1.31 
  -3  10   0    6.55    1.29 
   3 -10   0    6.32    1.10 
   3 -10   0    7.28    1.33 
   3 -10   0    5.08    1.10 
  -3  10   0    4.58    1.11 
  -2  10   0   20.89    2.60 
   2 -10   0   23.07    2.22 
   2 -10   0   26.07    2.25 
   2 -10   0   25.77    2.53 
  -2  10   0   25.61    2.43 
   2 -10   0   26.00    2.32 
 -10  -2   0   24.49    1.86 
   2 -10   0   21.13    2.40 
   2 -10   0   22.29    2.06 
  -2  10   0   23.07    2.39 
 -10  -2   0   22.77    1.81 
  10   2   0   25.13    1.78 
  10   2   0   25.36    1.84 
   2 -10   0   22.64    2.38 
   2 -10   0   25.39    2.31 
 -10  -2   0   24.46    1.85 
  -2  10   0   29.55    2.58 
  10   2   0   22.33    1.79 
  -2  10   0   25.84    2.50 
  -2  10   0   26.15    2.42 
   2 -10   0   24.91    2.26 
  -2  10   0   23.02    2.14 
   1 -10   0   59.71    4.07 
 -10  -1   0   52.76    3.76 
   1 -10   0   54.90    4.59 
   1 -10   0   50.76    4.42 
  -1  10   0   56.54    3.99 
   1 -10   0   58.15    4.24 
  10   1   0   60.98    3.58 
 -10  -1   0   56.03    3.72 
   1 -10   0   53.99    4.13 
   1 -10   0   54.93    4.06 
  -1  10   0   53.63    4.38 
  -1  10   0   63.76    4.96 
  -1  10   0   47.65    4.19 
  -1  10   0   49.51    4.31 
  -1  10   0   49.95    4.26 
   1 -10   0   56.22    4.25 
  -1  10   0   67.42    4.46 
   1 -10   0   56.23    4.29 
  10   1   0   55.19    3.74 
 -10  -1   0   52.77    3.75 
  10   1   0   55.63    3.75 
   1 -10   0   59.65    4.17 
   0  10   0  146.87   10.28 
   0 -10   0  162.73   10.14 
   0  10   0  154.07    9.78 
  10   0   0  165.92   10.25 
 -10   0   0  140.07    9.84 
   0 -10   0  156.29   10.29 
  10   0   0  147.79   10.00 
   0 -10   0  153.69   10.47 
   0 -10   0  165.22   10.09 
   0 -10   0  153.25   11.21 
   0  10   0  155.60   10.59 
  10   0   0  162.26    9.37 
   0 -10   0  179.67   10.95 
   0 -10   0  151.20   10.56 
   0  10   0  140.69   11.36 
   0  10   0  162.48   10.74 
   0 -10   0  170.00   10.30 
   0 -10   0  161.76    9.86 
 -10   0   0  139.96    9.86 
 -10   0   0  146.41    9.81 
  10   0   0  158.92   10.00 
   0  10   0  142.04   10.16 
   0  10   0  170.27   10.30 
 -10   1   0   55.24    3.82 
   1  10   0   56.01    4.28 
  -1 -10   0   54.35    4.11 
   1  10   0   51.45    4.21 
  -1 -10   0   53.58    4.25 
  10  -1   0   60.74    3.65 
  -1 -10   0   50.50    4.51 
   1  10   0   56.47    4.33 
   1  10   0   61.61    4.38 
   1  10   0   58.27    4.02 
  10  -1   0   51.67    4.23 
 -10   1   0   51.26    3.74 
   1  10   0   53.61    4.34 
 -10   1   0   55.22    3.82 
  -1 -10   0   58.43    4.44 
   1  10   0   57.13    4.83 
  10  -1   0   53.89    3.82 
  -1 -10   0   53.72    4.13 
  -1 -10   0   62.89    4.60 
  -1 -10   0   60.83    4.16 
  -1 -10   0   57.64    4.29 
  10  -1   0   57.03    3.84 
  -1 -10   0   59.07    4.31 
 -10   1   0   51.30    3.74 
  10  -2   0   21.72    1.93 
  -2 -10   0   26.99    2.52 
   2  10   0   24.68    2.39 
  -2 -10   0   24.45    2.51 
  -2 -10   0   26.59    2.28 
 -10   2   0   24.99    1.98 
   2  10   0   24.26    2.69 
   2  10   0   25.85    2.35 
  -2 -10   0   23.90    2.33 
  10  -2   0   24.48    2.36 
   2  10   0   25.33    2.38 
   2  10   0   22.28    2.10 
   2  10   0   17.04    2.19 
  -2 -10   0   26.41    2.45 
  10  -2   0   27.59    1.92 
 -10   2   0   25.05    1.92 
   2  10   0   24.80    2.40 
 -10   2   0   25.03    1.98 
 -10   2   0   25.02    1.92 
  -2 -10   0   26.50    2.30 
   3  10   0    7.25    1.46 
  10  -3   0    5.81    0.87 
 -10   3   0    6.17    0.89 
   3  10   0    5.73    1.21 
   3  10   0    5.65    1.18 
   3  10   0    6.14    1.39 
   3  10   0    6.06    1.21 
  -3 -10   0    7.23    1.23 
 -10   3   0    5.91    0.81 
  10  -3   0    4.85    0.82 
   3  10   0    5.00    1.02 
   3  10   0    5.26    1.11 
  10  -3   0    7.54    1.36 
 -10   3   0    5.91    0.81 
  -3 -10   0    5.97    1.21 
   3  10   0    3.72    0.96 
 -10   3   0    6.71    0.92 
 -10   3   0    6.17    0.89 
  -4 -10   0    0.66    0.69 
 -10   4   0    0.53    0.50 
  10  -4   0    0.44    0.33 
  10  -4   0    1.15    0.88 
  10  -4   0    0.28    0.34 
   4  10   0    0.86    0.65 
  10  -4   0    0.24    0.47 
  10  -4   0   -0.04    0.49 
   4  10   0    1.33    0.71 
   4  10   0    1.32    0.77 
  10  -4   0    0.44    0.47 
   4  10   0    2.32    0.96 
   4  10   0    0.47    0.61 
   4  10   0   -0.05    0.69 
   4  10   0    1.22    0.77 
  -4 -10   0    0.60    0.69 
   5  10   0    1.53    0.80 
   5  10   0    1.91    0.95 
  -5 -10   0    2.35    0.92 
  10  -5   0    1.43    0.66 
  10  -5   0    1.81    0.68 
   5  10   0    0.55    0.80 
   5  10   0    1.02    0.72 
  -5 -10   0    1.92    0.86 
  10  -5   0    1.55    0.52 
   5  10   0    2.61    0.84 
   5  10   0    2.54    0.90 
  10  -5   0    2.00    0.67 
  10  -5   0    1.55    0.52 
   5  10   0    1.58    0.83 
  10  -5   0    1.96    1.07 
 -10   5   0    1.49    0.75 
  10  -6   0   15.51    1.57 
  10  -6   0   19.70    2.27 
  -6 -10   0   19.19    2.09 
   6  10   0   19.44    2.01 
  10  -6   0   17.93    1.62 
   6  10   0   17.21    2.31 
  -6 -10   0   18.82    2.09 
   6  10   0   14.72    2.09 
   6  10   0   18.42    2.12 
  10  -6   0   15.99    1.73 
   6  10   0   22.68    2.02 
   6  10   0   22.27    2.00 
   6  10   0   19.44    2.05 
  10  -6   0   20.62    2.01 
  10  -6   0   18.13    1.88 
  10  -7   0    0.69    0.65 
  10  -7   0    0.70    0.58 
  -7 -10   0    1.85    0.84 
   7  10   0    0.21    0.72 
   7  10   0    0.77    0.63 
  10  -7   0    0.53    0.71 
  10  -7   0   -0.22    0.61 
   7  10   0    0.69    0.73 
   7  10   0    0.81    0.63 
  10  -7   0    0.23    0.60 
  10  -7   0    0.29    0.47 
   7  10   0    0.18    0.63 
  10  -8   0   57.83    4.00 
   8  10   0   51.33    3.95 
  10  -8   0   61.83    4.19 
  10  -8   0   47.18    4.27 
   8  10   0   54.04    4.27 
   8  10   0   52.98    4.51 
  10  -8   0   56.30    3.79 
   8  10   0   56.66    3.90 
 -10   9   0    3.98    1.33 
   9  10   0    3.19    1.00 
   9  10   0    1.89    0.69 
  10  -9   0    1.42    0.94 
  10  -9   0    2.06    0.96 
   9  10   0    1.97    0.96 
  10  -9   0    2.28    0.76 
  10  -9   0    1.99    0.91 
  10 -10   0   17.68    1.91 
  10 -10   0   15.72    1.62 
  10  10   0   16.21    1.86 
  10  10   0   15.00    1.20 
  10 -10   0   13.63    1.87 
  10 -11   0   16.04    2.16 
  10 -11   0   23.00    2.01 
   9 -11   0   26.41    2.46 
   9 -11   0   24.47    2.62 
   9 -11   0   27.94    2.49 
   9 -11   0   26.85    2.63 
   8 -11   0    6.85    1.30 
  11   8   0    8.75    1.27 
  -8  11   0   10.86    1.96 
   8 -11   0    8.24    1.58 
   8 -11   0   12.32    1.59 
  -7  11   0    5.82    1.51 
   7 -11   0    3.70    1.02 
  11   7   0    3.32    0.83 
   7 -11   0    2.80    0.95 
   7 -11   0    4.01    1.13 
   6 -11   0    4.14    1.05 
   6 -11   0    1.70    0.92 
   6 -11   0    4.64    1.19 
  11   6   0    4.54    0.78 
   6 -11   0    1.00    0.75 
 -11  -6   0    2.48    0.76 
 -11  -6   0    2.48    0.76 
  -6  11   0    1.60    1.02 
  -5  11   0   34.94    3.60 
   5 -11   0   43.79    3.41 
   5 -11   0   40.18    3.37 
   5 -11   0   40.72    3.56 
 -11  -5   0   40.48    3.12 
  11   5   0   41.62    2.99 
   5 -11   0   45.55    3.48 
  -5  11   0   42.09    3.67 
 -11  -5   0   40.47    3.13 
  11   4   0    6.25    0.76 
   4 -11   0    6.78    1.35 
  11   4   0    6.58    0.78 
   4 -11   0    7.10    1.32 
 -11  -4   0    4.39    0.84 
   4 -11   0    4.83    1.35 
   4 -11   0    7.03    1.50 
   4 -11   0    7.76    1.37 
   4 -11   0    7.33    0.85 
   4 -11   0    6.81    1.52 
  -4  11   0    7.51    1.48 
 -11  -4   0    7.45    0.96 
 -11  -4   0    7.46    0.96 
   4 -11   0    8.33    1.39 
  -4  11   0    7.51    1.49 
   4 -11   0    6.24    1.15 
   3 -11   0    3.36    1.11 
 -11  -3   0    2.71    0.65 
 -11  -3   0    2.92    0.65 
  -3  11   0    3.68    1.10 
   3 -11   0    3.31    0.80 
  -3  11   0    3.91    1.15 
   3 -11   0    2.93    1.01 
 -11  -3   0    2.71    0.65 
   3 -11   0    2.98    0.98 
  -3  11   0    4.48    1.20 
   3 -11   0    3.78    1.12 
   3 -11   0    5.25    1.31 
   3 -11   0    2.22    0.97 
   3 -11   0    4.77    1.05 
  -3  11   0    2.08    1.02 
  -3  11   0    2.37    1.10 
   3 -11   0    3.02    0.95 
  -3  11   0    3.07    1.05 
  11   3   0    3.60    0.50 
  11   3   0    3.33    0.49 
   2 -11   0   61.93    4.97 
   2 -11   0   57.12    4.36 
   2 -11   0   58.73    4.40 
   2 -11   0   58.78    4.54 
   2 -11   0   59.55    4.33 
   2 -11   0   59.90    4.24 
   2 -11   0   59.67    4.49 
  -2  11   0   55.42    4.57 
  -2  11   0   66.00    4.72 
 -11  -2   0   54.37    3.99 
   2 -11   0   63.10    4.88 
 -11  -2   0   56.27    3.94 
  -2  11   0   57.28    4.68 
 -11  -2   0   54.41    3.99 
  -2  11   0   52.84    5.03 
  -2  11   0   61.92    4.73 
   2 -11   0   56.73    4.59 
  -2  11   0   57.70    4.59 
   1 -11   0   42.69    3.54 
 -11  -1   0   45.89    3.30 
   1 -11   0   46.23    3.78 
  -1  11   0   45.68    3.86 
 -11  -1   0   43.93    3.22 
  -1  11   0   48.98    4.00 
   1 -11   0   42.28    3.67 
   1 -11   0   47.50    3.72 
   1 -11   0   47.90    3.74 
  -1  11   0   52.13    4.03 
   1 -11   0   49.98    4.11 
  -1  11   0   46.83    3.60 
  11   1   0   43.24    3.84 
 -11  -1   0   45.91    3.30 
   1 -11   0   50.47    3.69 
   1 -11   0   47.37    4.13 
   1 -11   0   47.41    3.88 
  -1  11   0   48.42    3.98 
  -1  11   0   52.28    4.46 
  -1  11   0   50.54    3.96 
   0 -11   0    0.26    0.73 
  11   0   0   -0.19    0.33 
   0  11   0   -0.76    0.64 
   0  11   0    0.50    0.70 
   0  11   0   -0.45    0.69 
  11   0   0   -0.15    0.29 
   0  11   0    0.51    0.66 
 -11   0   0    0.03    0.38 
   0  11   0   -0.06    0.76 
  11   0   0    0.38    0.79 
   0  11   0    0.77    0.67 
   0 -11   0    0.47    0.76 
   0 -11   0   -0.17    0.52 
 -11   0   0    0.03    0.38 
   0 -11   0   -0.50    0.53 
   0 -11   0    0.74    0.62 
   0 -11   0    0.35    0.68 
 -11   0   0    0.25    0.39 
   0  11   0    0.03    0.62 
   0 -11   0    0.65    0.67 
   1  11   0   46.66    3.95 
 -11   1   0   43.24    3.34 
  -1 -11   0   48.44    3.70 
  -1 -11   0   43.95    3.78 
  -1 -11   0   51.44    4.19 
   1  11   0   42.89    3.81 
   1  11   0   52.66    3.68 
  -1 -11   0   50.64    3.78 
  -1 -11   0   51.89    3.80 
   1  11   0   54.39    4.01 
  -1 -11   0   45.16    3.82 
  11  -1   0   49.13    3.89 
 -11   1   0   45.04    3.28 
  11  -1   0   47.42    3.28 
  11  -1   0   47.37    3.26 
 -11   1   0   43.22    3.34 
   1  11   0   39.13    4.19 
  11  -1   0   49.41    3.16 
 -11   1   0   45.04    3.28 
  -1 -11   0   47.46    4.06 
   1  11   0   49.02    3.91 
   1  11   0   49.36    3.94 
   2  11   0   52.21    4.42 
 -11   2   0   55.67    4.02 
  -2 -11   0   64.22    4.38 
 -11   2   0   55.61    4.02 
  -2 -11   0   68.18    4.83 
   2  11   0   66.30    4.72 
  11  -2   0   57.80    3.78 
  -2 -11   0   56.00    4.48 
   2  11   0   59.38    5.12 
  -2 -11   0   54.63    4.46 
 -11   2   0   52.96    3.94 
  -2 -11   0   63.10    4.42 
  11  -2   0   56.78    3.97 
   2  11   0   60.84    4.55 
   2  11   0   57.08    4.18 
 -11   2   0   52.93    3.95 
   2  11   0   60.08    4.49 
   2  11   0   49.80    4.34 
  11  -2   0   48.61    4.28 
  -3 -11   0    2.44    1.02 
  11  -3   0    2.71    0.69 
   3  11   0    2.48    0.87 
 -11   3   0    3.41    0.75 
   3  11   0    4.71    1.15 
  -3 -11   0    2.46    0.93 
   3  11   0    3.96    1.19 
  11  -3   0    3.54    0.74 
   3  11   0    2.24    0.89 
 -11   3   0    2.43    0.70 
  11  -3   0    4.02    1.17 
 -11   3   0    3.40    0.75 
   3  11   0    3.74    1.07 
  -3 -11   0    5.21    1.12 
   3  11   0    4.98    1.17 
  11  -4   0    5.75    1.46 
  -4 -11   0    8.68    1.50 
   4  11   0    5.63    1.25 
  11  -4   0    6.41    0.98 
   4  11   0    5.95    1.52 
   4  11   0    5.82    1.28 
  -4 -11   0    5.88    1.30 
  11  -4   0    6.63    0.97 
 -11   4   0    7.24    1.09 
   4  11   0    5.63    1.31 
   4  11   0    7.27    1.37 
  -5 -11   0   44.88    3.82 
   5  11   0   45.59    3.80 
  -5 -11   0   45.53    3.82 
  11  -5   0   51.11    3.95 
  11  -5   0   44.40    3.50 
   5  11   0   43.97    3.64 
   5  11   0   44.60    4.08 
  11  -5   0   42.97    3.27 
   5  11   0   47.54    3.73 
   6  11   0    3.81    1.13 
   6  11   0    4.04    1.10 
  11  -6   0    4.68    0.99 
  -6 -11   0    3.17    1.07 
  11  -6   0    1.90    1.22 
  11  -6   0    3.31    0.92 
  11  -6   0    3.01    0.57 
  11  -6   0    2.58    0.57 
   6  11   0    3.46    1.18 
  -6 -11   0    3.88    1.12 
   6  11   0    3.34    0.96 
   6  11   0    3.47    1.00 
  11  -7   0    3.29    0.96 
  -7 -11   0    4.39    1.18 
  11  -7   0    4.64    0.78 
   7  11   0    2.61    0.94 
   7  11   0    3.79    1.25 
   7  11   0    3.73    0.99 
   7  11   0    2.03    0.90 
  11  -7   0    3.92    1.01 
   7  11   0    2.61    1.03 
  11  -7   0    3.55    0.73 
   8  11   0    7.51    1.49 
  -8 -11   0   12.90    1.76 
   8  11   0    8.17    1.63 
   8  11   0    9.68    1.38 
  11  -8   0    8.59    1.41 
  11  -8   0   10.42    1.52 
   8  11   0    9.03    1.24 
  11  -8   0    8.49    1.17 
  11  -9   0   26.18    2.25 
   9  11   0   30.82    2.67 
   9  11   0   24.44    2.18 
  11  -9   0   22.16    2.40 
  11 -10   0   18.44    2.13 
  10  11   0   19.11    2.13 
  11 -11   0    3.97    1.15 
  11 -12   0   -0.81    0.80 
  10 -12   0    0.11    0.85 
  10 -12   0    0.45    0.76 
   9 -12   0    2.74    0.97 
   9 -12   0    2.28    0.97 
   9 -12   0    2.60    1.06 
   8 -12   0    1.61    0.88 
   8 -12   0    1.35    0.94 
   8 -12   0    1.23    0.88 
   7 -12   0    1.39    0.95 
   7 -12   0   -0.58    0.65 
   7 -12   0    0.61    0.72 
 -12  -6   0   16.52    1.73 
  -6  12   0   16.07    2.41 
   6 -12   0   13.33    1.87 
   6 -12   0   14.28    1.91 
   6 -12   0   15.00    2.05 
  12   6   0   15.33    1.34 
   6 -12   0   16.42    2.05 
 -12  -6   0   16.54    1.74 
  -5  12   0   -0.22    0.87 
   5 -12   0    0.74    0.81 
   5 -12   0   -0.31    0.62 
   5 -12   0    0.59    0.80 
 -12  -5   0   -0.49    0.44 
  -5  12   0    0.20    0.88 
   5 -12   0    0.52    0.71 
 -12  -5   0   -0.49    0.44 
 -12  -4   0   48.59    3.33 
   4 -12   0   39.10    3.53 
   4 -12   0   32.66    3.42 
  -4  12   0   39.34    3.90 
 -12  -4   0   45.89    3.27 
  -4  12   0   44.04    3.85 
   4 -12   0   47.83    3.92 
 -12  -4   0   48.55    3.34 
   4 -12   0   39.90    3.53 
   3 -12   0    0.65    0.72 
 -12  -3   0    1.60    0.61 
  -3  12   0    0.20    0.76 
  -3  12   0    1.32    0.90 
   3 -12   0    0.68    0.76 
 -12  -3   0    0.80    0.54 
   3 -12   0    1.72    0.70 
   3 -12   0   -0.54    0.77 
 -12  -3   0    1.60    0.60 
  -3  12   0    0.42    0.83 
   3 -12   0    1.23    0.87 
  -3  12   0    0.33    0.87 
   3 -12   0    0.38    0.73 
   2 -12   0   60.75    4.85 
  12   2   0   58.66    4.76 
 -12  -2   0   61.27    4.17 
  -2  12   0   62.67    4.85 
 -12  -2   0   59.43    4.11 
   2 -12   0   62.29    4.55 
  -2  12   0   56.55    4.81 
   2 -12   0   53.83    4.30 
   2 -12   0   56.01    5.06 
 -12  -2   0   61.27    4.17 
  -2  12   0   61.58    4.85 
   2 -12   0   59.14    4.58 
   2 -12   0   52.61    4.55 
   2 -12   0   66.10    4.67 
 -12  -1   0    0.61    0.48 
   1 -12   0    0.35    0.83 
  -1  12   0   -0.18    0.73 
  -1  12   0    0.37    0.86 
   1 -12   0    1.45    0.85 
  12   1   0    0.75    0.82 
  -1  12   0    1.70    0.84 
   1 -12   0    0.13    0.67 
  -1  12   0    0.97    0.80 
 -12  -1   0    0.84    0.45 
  -1  12   0   -0.15    0.74 
 -12  -1   0    0.61    0.47 
  -1  12   0    0.05    0.81 
   1 -12   0    0.94    0.84 
   1 -12   0    1.22    0.71 
  -1  12   0   -0.87    0.67 
   1 -12   0    1.08    0.89 
   1 -12   0    0.43    0.80 
   0 -12   0   19.11    1.92 
   0  12   0   19.53    2.06 
   0  12   0   19.17    2.61 
   0  12   0   18.37    2.29 
 -12   0   0   16.22    1.61 
 -12   0   0   16.21    1.61 
 -12   0   0   16.75    1.56 
   0 -12   0   18.53    2.34 
   0  12   0   19.37    2.28 
   0 -12   0   20.51    2.20 
   0  12   0   18.23    2.27 
  12   0   0   19.62    2.32 
   0  12   0   19.79    2.34 
   0 -12   0   19.33    2.36 
   0  12   0   18.88    2.38 
   0 -12   0   18.30    2.09 
   0 -12   0   17.91    2.13 
   1  12   0    0.65    0.81 
  -1 -12   0    0.63    0.78 
  12  -1   0    0.85    0.87 
   1  12   0    0.22    0.67 
   1  12   0    0.31    0.81 
   1  12   0    1.07    0.85 
 -12   1   0    0.12    0.45 
  -1 -12   0    0.81    0.77 
  -1 -12   0    0.81    0.84 
 -12   1   0    0.48    0.49 
  -1 -12   0   -0.31    0.74 
 -12   1   0    0.48    0.48 
   1  12   0    0.81    0.83 
  -2 -12   0   59.10    4.63 
 -12   2   0   59.85    4.28 
  -2 -12   0   57.27    4.73 
  -2 -12   0   61.36    4.84 
  -2 -12   0   56.84    4.56 
  12  -2   0   61.36    4.08 
  12  -2   0   58.48    4.70 
   2  12   0   60.56    4.75 
   2  12   0   55.91    4.75 
   2  12   0   59.76    4.74 
 -12   2   0   60.19    4.21 
  12  -2   0   60.76    3.94 
 -12   2   0   59.82    4.28 
   2  12   0   63.05    4.45 
  12  -3   0    0.73    0.51 
   3  12   0    1.61    0.92 
  12  -3   0    0.19    0.82 
  12  -3   0    0.64    0.55 
  -3 -12   0    0.56    0.77 
 -12   3   0    0.56    0.48 
   3  12   0    0.48    0.82 
  -3 -12   0    1.45    0.91 
  -3 -12   0    0.70    0.78 
  -3 -12   0    0.83    0.79 
   3  12   0    1.53    0.92 
   4  12   0   44.02    3.79 
  -4 -12   0   40.93    3.82 
 -12   4   0   43.83    3.46 
   4  12   0   40.01    3.66 
  12  -4   0   49.04    3.22 
  12  -4   0   44.36    3.33 
  -4 -12   0   45.89    4.12 
   4  12   0   42.41    3.68 
  -4 -12   0   39.99    3.74 
  12  -4   0   50.88    4.03 
   5  12   0    0.18    0.79 
  12  -5   0    1.30    1.13 
  -5 -12   0    0.40    0.86 
  12  -5   0   -0.04    0.58 
   5  12   0    0.29    0.70 
   5  12   0    0.93    0.80 
  12  -5   0    0.67    0.61 
  -5 -12   0    1.19    0.80 
   6  12   0   11.35    2.06 
   6  12   0   14.23    2.04 
  12  -6   0   16.16    1.68 
   6  12   0   13.83    1.80 
  -6 -12   0   15.29    2.11 
  12  -6   0   12.28    1.54 
   6  12   0   14.02    1.85 
  12  -6   0   16.54    2.26 
  -6 -12   0   14.05    1.99 
   6  12   0   13.74    1.85 
  -7 -12   0   -0.29    0.76 
   7  12   0    0.05    0.66 
   7  12   0   -0.09    0.77 
   7  12   0    0.73    0.99 
  12  -7   0    0.63    0.75 
   7  12   0    1.58    0.86 
   7  12   0   -0.18    0.68 
  12  -8   0    1.19    0.40 
   8  12   0    0.78    0.85 
  12  -8   0    0.65    0.78 
   8  12   0    2.69    0.88 
   8  12   0    2.13    0.79 
  12  -9   0    4.61    1.14 
   9  12   0    1.29    0.98 
  12 -10   0    1.13    0.86 
  10  12   0    0.08    0.80 
  12 -11   0    2.32    1.09 
  12 -12   0   58.92    4.49 
  11 -13   0    4.85    1.36 
  10 -13   0   14.31    1.60 
   9 -13   0   24.90    2.80 
   9 -13   0   29.32    2.74 
   9 -13   0   32.18    2.75 
   8 -13   0    4.16    1.20 
   8 -13   0    6.44    1.34 
   8 -13   0    4.58    1.36 
   7 -13   0    0.21    0.85 
   7 -13   0    3.74    1.13 
   7 -13   0    1.64    0.95 
   6 -13   0    5.04    1.40 
   6 -13   0    6.69    1.35 
   6 -13   0    3.69    1.17 
   5 -13   0   26.69    2.90 
   5 -13   0   30.11    2.74 
  -5  13   0   20.91    2.92 
   5 -13   0   23.39    2.64 
   5 -13   0   30.90    2.84 
  -4  13   0    1.39    1.08 
   4 -13   0    2.16    0.96 
  -4  13   0   -0.53    0.84 
   4 -13   0    1.49    0.96 
 -13  -4   0    1.64    0.70 
   4 -13   0    2.80    1.27 
   4 -13   0    2.56    1.11 
 -13  -4   0    1.64    0.70 
   3 -13   0    0.50    0.81 
   3 -13   0    0.44    0.79 
 -13  -3   0    0.00    0.49 
   3 -13   0   -0.10    0.85 
 -13  -3   0   -0.24    0.48 
  13   3   0    0.03    0.94 
   3 -13   0    0.15    0.58 
  -3  13   0   -0.05    0.93 
  -3  13   0    0.49    0.90 
   3 -13   0    0.29    0.89 
 -13  -3   0    0.00    0.49 
  -3  13   0   -0.33    0.89 
   3 -13   0   -0.65    0.69 
   2 -13   0   35.60    3.19 
  13   2   0   30.08    3.30 
 -13  -2   0   34.40    2.68 
   2 -13   0   38.44    3.52 
 -13  -2   0   34.37    2.68 
 -13  -2   0   33.59    2.64 
  -2  13   0   31.47    3.33 
   2 -13   0   32.53    3.12 
   2 -13   0   37.64    3.19 
  -2  13   0   34.08    3.33 
   2 -13   0   33.17    2.79 
  -2  13   0   28.24    3.28 
  -2  13   0   39.01    3.59 
  -1  13   0   37.41    3.44 
  -1  13   0   34.25    3.37 
   1 -13   0   37.68    2.94 
 -13  -1   0   29.86    2.54 
 -13  -1   0   32.90    2.62 
   1 -13   0   34.86    3.15 
   1 -13   0   33.03    3.12 
  -1  13   0   35.87    3.40 
 -13  -1   0   32.89    2.63 
  13   1   0   32.85    3.20 
   1 -13   0   28.50    3.32 
   1 -13   0   38.79    3.30 
  -1  13   0   34.35    3.35 
   0 -13   0    0.04    0.80 
  13   0   0    0.06    0.91 
   0  13   0    0.03    0.76 
   0  13   0    0.72    0.95 
   0  13   0   -0.42    0.76 
 -13   0   0    0.06    0.47 
   0 -13   0   -0.47    0.79 
 -13   0   0    0.27    0.49 
   0  13   0    0.75    0.95 
   0 -13   0   -0.43    0.72 
   0 -13   0    1.32    0.86 
   0 -13   0   -0.57    0.63 
 -13   0   0    0.27    0.49 
 -13   1   0   28.56    2.51 
  -1 -13   0   34.89    3.11 
   1  13   0   32.07    3.28 
   1  13   0   36.04    3.35 
  -1 -13   0   33.28    3.25 
   1  13   0   32.73    3.13 
  -1 -13   0   37.01    3.15 
  -1 -13   0   31.15    2.85 
  13  -1   0   32.22    3.14 
 -13   1   0   28.53    2.51 
   2  13   0   38.12    3.51 
 -13   2   0   35.20    2.88 
 -13   2   0   38.11    2.90 
  13  -2   0   33.89    3.30 
   2  13   0   31.47    3.28 
  -2 -13   0   39.06    3.55 
  -2 -13   0   33.14    3.23 
   2  13   0   34.69    3.30 
  -2 -13   0   35.51    3.29 
  -2 -13   0   33.60    3.12 
 -13   2   0   35.23    2.89 
  -3 -13   0    0.67    0.94 
   3  13   0    0.16    0.80 
   3  13   0    0.27    0.82 
  -3 -13   0    1.09    0.88 
   3  13   0   -0.80    0.63 
 -13   3   0    0.55    0.60 
  -3 -13   0   -0.26    0.74 
  13  -3   0    0.75    0.40 
  13  -3   0    1.62    1.13 
  -4 -13   0    0.84    0.94 
  13  -4   0    0.85    1.21 
  -4 -13   0    0.92    0.96 
  13  -4   0    2.06    0.72 
  13  -4   0    2.38    0.62 
   4  13   0    0.15    0.82 
   4  13   0    2.00    0.98 
   4  13   0    1.92    1.02 
   5  13   0   27.34    3.03 
  13  -5   0   24.53    2.26 
  -5 -13   0   25.34    2.99 
   5  13   0   30.05    2.86 
  13  -5   0   33.65    3.14 
   5  13   0   30.57    2.83 
  13  -6   0    3.88    1.72 
   6  13   0    2.20    1.05 
   6  13   0    2.48    1.06 
  -6 -13   0    2.27    1.14 
   6  13   0    3.88    1.26 
  13  -6   0    3.00    0.89 
   7  13   0    2.50    1.01 
  13  -7   0    3.70    1.01 
   7  13   0    3.15    1.18 
   7  13   0    1.13    0.89 
  13  -8   0    3.47    1.03 
   8  13   0    5.67    1.40 
   9  13   0   29.79    2.89 
  13  -9   0   26.18    2.47 
  10  13   0   12.34    1.79 
  13 -10   0   13.55    1.72 
  13 -11   0    4.03    1.20 
   9 -14   0    1.55    1.04 
   9 -14   0    1.67    0.95 
   9 -14   0    0.77    0.96 
   8 -14   0   26.27    2.84 
   8 -14   0   21.81    2.49 
   8 -14   0   31.03    2.72 
   7 -14   0   -0.60    0.77 
   7 -14   0    0.69    1.09 
   7 -14   0    1.95    0.98 
   6 -14   0    9.68    1.71 
   6 -14   0   12.41    1.84 
   6 -14   0    8.51    1.74 
  -5  14   0    0.63    1.14 
  14   5   0    0.20    0.93 
   5 -14   0    1.56    1.16 
   5 -14   0   -0.97    0.77 
   5 -14   0    0.75    0.85 
   5 -14   0    1.64    1.06 
   4 -14   0   -0.33    0.99 
   4 -14   0    0.26    0.88 
  -4  14   0    1.25    1.10 
   4 -14   0   -0.97    0.85 
  14   4   0    1.73    1.16 
   4 -14   0   -0.36    0.73 
  14   3   0   -0.78    0.81 
   3 -14   0    0.95    1.01 
   3 -14   0   -0.89    0.77 
  -3  14   0    0.39    0.95 
  -3  14   0   -0.70    0.95 
   3 -14   0   -0.34    0.70 
   3 -14   0    0.53    1.10 
   2 -14   0   14.73    2.09 
  14   2   0   12.79    2.16 
  -2  14   0   13.62    2.34 
   2 -14   0   11.55    2.16 
   2 -14   0   13.87    2.03 
   2 -14   0   13.07    1.53 
  -2  14   0   10.20    1.98 
  -2  14   0   12.96    2.22 
  -1  14   0   25.86    3.00 
   1 -14   0   26.17    2.85 
  -1  14   0   26.22    3.04 
  -1  14   0   30.76    3.12 
  -1  14   0   27.81    3.14 
  14   1   0   26.77    2.95 
   1 -14   0   25.92    2.42 
   1 -14   0   18.34    2.80 
   1 -14   0   26.83    2.87 
   0  14   0   37.10    3.46 
   0  14   0   30.24    3.44 
   0  14   0   32.11    3.36 
   0  14   0   33.68    3.52 
  14   0   0   38.48    3.43 
   0 -14   0   31.72    3.22 
   0 -14   0   35.40    3.27 
   0 -14   0   33.90    2.99 
  14  -1   0   26.93    3.00 
  -1 -14   0   24.78    2.51 
  -1 -14   0   20.66    2.88 
   1  14   0   28.00    3.06 
   1  14   0   24.18    3.04 
   1  14   0   26.53    2.95 
  -1 -14   0   28.38    2.87 
  14  -2   0   11.95    2.04 
  -2 -14   0   14.04    1.79 
   2  14   0   11.63    2.02 
   2  14   0   10.58    1.90 
   2  14   0   11.65    2.14 
  -2 -14   0    7.78    1.66 
  -2 -14   0   13.26    2.21 
  14  -3   0    0.46    1.10 
   3  14   0   -0.58    0.74 
  -3 -14   0    1.81    1.16 
  -3 -14   0   -1.08    0.85 
   3  14   0   -0.28    0.87 
   3  14   0    0.22    0.85 
  -4 -14   0    0.82    1.04 
   4  14   0    0.70    0.95 
   4  14   0   -0.26    0.78 
   4  14   0    0.80    0.87 
  14  -4   0    1.11    1.32 
  -5 -14   0    2.58    1.22 
   5  14   0   -0.45    0.83 
   5  14   0   -0.45    0.86 
  14  -5   0    1.02    1.40 
   5  14   0    0.93    0.89 
   6  14   0   14.02    1.91 
  -6 -14   0   10.03    2.01 
   6  14   0   14.13    1.92 
   6  14   0   11.18    2.07 
   7  14   0    0.61    0.87 
  14  -7   0    1.17    0.84 
   7  14   0    0.43    0.93 
  14  -8   0   26.40    2.31 
   8  14   0   25.21    2.80 
  14  -9   0    0.30    0.84 
   9  14   0    1.67    1.10 
   8 -15   0    1.33    0.99 
   8 -15   0    2.27    1.23 
   7 -15   0    6.38    1.44 
   7 -15   0    8.44    1.74 
   7 -15   0    6.17    1.42 
   6 -15   0   17.49    2.18 
   6 -15   0   13.79    1.97 
   6 -15   0   18.09    2.37 
  15   6   0   15.70    2.39 
  15   5   0   10.18    1.98 
   5 -15   0   12.13    1.90 
  -5  15   0   13.85    2.43 
   5 -15   0    9.54    1.78 
   5 -15   0   12.75    2.10 
   4 -15   0    6.28    1.65 
  -4  15   0    5.73    1.62 
   4 -15   0    3.05    1.24 
   4 -15   0    4.09    1.29 
  15   4   0    3.87    1.38 
   3 -15   0   26.78    3.02 
   3 -15   0   28.69    3.28 
  -3  15   0   33.53    3.57 
   3 -15   0   28.11    3.02 
  -3  15   0   38.34    3.58 
  15   3   0   28.00    3.23 
   2 -15   0    2.47    1.14 
  15   2   0    4.79    1.55 
  -2  15   0    3.25    1.35 
   2 -15   0    4.59    1.52 
   2 -15   0    2.97    1.26 
  -2  15   0    3.67    1.49 
  -2  15   0    2.95    1.33 
   1 -15   0   -0.15    1.13 
   1 -15   0    1.85    1.06 
  -1  15   0    0.40    0.94 
  15   1   0    1.24    1.06 
  -1  15   0   -0.23    0.95 
  -1  15   0    1.43    1.24 
   1 -15   0    1.05    1.03 
   0 -15   0   -0.18    0.96 
   0  15   0    0.08    0.94 
   0  15   0    0.69    0.96 
   0 -15   0   -1.73    0.72 
  15   0   0    0.65    1.11 
   0  15   0   -0.30    1.00 
   0 -15   0   -0.71    0.94 
  -1 -15   0    0.39    0.96 
   1  15   0   -0.43    0.79 
  -1 -15   0    1.75    1.10 
  15  -1   0   -0.10    1.11 
   1  15   0    0.91    1.01 
   1  15   0    0.89    1.08 
  15  -2   0    4.13    1.45 
   2  15   0    3.26    1.36 
  -2 -15   0    4.12    1.46 
   2  15   0    2.31    1.16 
   2  15   0    1.47    1.16 
  15  -3   0   31.41    3.37 
   3  15   0   36.06    3.56 
   3  15   0   25.71    3.13 
  -3 -15   0   35.42    3.59 
   3  15   0   30.27    3.27 
  15  -4   0    6.06    1.73 
   4  15   0    4.01    1.38 
   4  15   0    2.83    1.31 
   4  15   0    4.42    1.34 
  15  -5   0   13.16    2.31 
   5  15   0   12.27    2.12 
   5  15   0   12.77    2.00 
   5  15   0   10.83    1.87 
   6  15   0   15.73    2.03 
   6  15   0   16.16    2.35 
   6  15   0   17.98    2.14 
   7  15   0    6.70    1.27 
   7  15   0    4.14    1.39 
   6 -16   0    3.28    1.20 
   5 -16   0    2.98    1.15 
   5 -16   0    1.17    1.02 
   4 -16   0   17.28    2.36 
   4 -16   0   19.71    2.42 
  -4  16   0   21.97    2.88 
  -3  16   0    3.71    1.52 
   3 -16   0    5.27    1.50 
   3 -16   0    4.80    1.40 
  -3  16   0    3.87    1.61 
  -2  16   0   -0.25    1.16 
   2 -16   0   -0.60    0.90 
  -2  16   0    0.27    1.07 
   2 -16   0   -0.57    0.96 
  16   2   0    1.66    1.40 
   1 -16   0    2.37    1.20 
  -1  16   0    3.51    1.43 
   1 -16   0    1.31    1.20 
  16   1   0    4.01    1.54 
  -1  16   0    2.34    1.31 
  -1  16   0    6.46    1.75 
  16   0   0   14.24    2.33 
   0 -16   0   17.79    2.35 
   0  16   0   17.50    2.57 
   0  16   0   13.29    2.32 
   0  16   0   12.65    2.29 
   0 -16   0   14.26    2.20 
  16  -1   0    5.98    1.68 
   1  16   0    2.38    1.43 
   1  16   0    4.00    1.47 
  -1 -16   0    2.33    1.14 
   1  16   0    3.29    1.32 
   2  16   0    1.74    1.23 
   2  16   0   -0.51    0.96 
   2  16   0    1.05    1.20 
  16  -2   0    1.35    1.39 
   3  16   0    5.41    1.59 
   3  16   0    4.96    1.52 
   3  16   0    3.35    1.41 
   4  16   0   19.88    2.59 
   4  16   0   18.44    2.42 
   4  16   0   17.67    2.39 
   5  16   0    1.68    1.12 
   5  16   0    1.13    1.11 
   5  16   0    1.31    1.08 
   2 -17   0   -0.37    0.98 
  -1  17   0   18.48    2.67 
   0  17   0   -0.61    1.17 
   1  17   0   19.54    2.68 
   2  17   0   -0.66    1.00 
   0   0  -1   -0.02    0.05 
   0   0  -1    0.00    0.04 
   0   0  -1   -0.02    0.03 
   0   0  -1    0.02    0.03 
   0   0   1    0.01    0.03 
   0   0   1   -0.02    0.04 
   0   0   1    0.03    0.05 
   0   0   1   -0.01    0.04 
   1   0  -1   69.55    4.53 
  -1   0  -1   73.53    4.73 
   0   1  -1   67.02    4.70 
  -1   0  -1   71.20    4.73 
   0  -1  -1   71.93    4.52 
   0  -1  -1   65.21    4.38 
   0  -1  -1   65.26    4.37 
   0   1  -1   67.00    5.02 
  -1   0  -1   71.39    4.50 
   0   1  -1   64.15    4.75 
   0  -1  -1   72.72    4.54 
   1   0  -1   68.07    5.01 
   0   1  -1   72.26    4.78 
   0  -1  -1   74.58    4.77 
   0  -1  -1   74.25    5.02 
   0   1   1   64.40    4.48 
   0   1   1   64.60    5.00 
  -1   0   1   72.97    4.38 
  -1   0   1   61.19    5.00 
  -1   0   1   67.57    4.76 
  -1   0   1   72.93    4.75 
   0   1   1   79.90    4.75 
  -1   0   1   72.83    4.39 
   0  -1   1   77.33    4.55 
   0  -1   1   62.65    5.00 
  -1   0   1   67.15    4.52 
   0   1   1   73.33    5.02 
   1   0   1   78.36    4.52 
   1  -1  -1    0.08    0.14 
  -1   1  -1   -0.12    0.06 
   1   1  -1    0.29    0.14 
  -1  -1  -1    0.00    0.09 
  -1   1  -1    0.59    0.15 
   1   1  -1    0.18    0.14 
   1  -1  -1   -0.01    0.07 
  -1  -1  -1    0.02    0.10 
  -1   1  -1    0.79    0.16 
  -1   1  -1    0.78    0.14 
   1  -1  -1    0.12    0.14 
   1   1  -1    0.49    0.16 
   1  -1  -1    0.33    0.15 
   1   1  -1    0.34    0.18 
  -1   1  -1    0.16    0.09 
   1  -1  -1    0.08    0.14 
  -1  -1  -1    0.21    0.11 
  -1   1  -1    0.28    0.12 
  -1   1  -1   -0.12    0.06 
   1   1  -1    0.31    0.12 
   1   1  -1    0.33    0.16 
  -1  -1  -1   -0.03    0.05 
  -1  -1  -1    0.57    0.08 
  -1   1  -1    0.48    0.11 
  -1  -1  -1    0.09    0.08 
  -1  -1   1    0.14    0.10 
  -1   1   1    0.78    0.16 
  -1  -1   1    1.24    0.19 
  -1   1   1    0.23    0.14 
   1  -1   1    0.29    0.12 
   1  -1   1    0.35    0.09 
   1   1   1    0.43    0.11 
  -1  -1   1    1.03    0.15 
  -1  -1   1    0.15    0.14 
  -1  -1   1   -0.01    0.12 
  -1   1   1    0.19    0.11 
  -1   1   1    0.53    0.18 
   1   1   1    0.14    0.10 
   1  -1   1    0.22    0.14 
  -1   1   1    0.50    0.19 
  -1   1   1    0.19    0.11 
  -1  -1   1    0.22    0.14 
   1  -1   1    0.73    0.16 
  -1  -1   1    0.14    0.10 
   1   1   1    0.35    0.12 
  -1  -1   1    0.04    0.08 
   1   1   1    0.31    0.11 
   1   1   1    0.28    0.11 
  -1   1   1    0.04    0.13 
   1  -1   1    0.24    0.12 
   1  -1   1    0.08    0.08 
  -2  -1  -1  184.07   12.18 
   1  -2  -1  170.44   12.06 
   2   1  -1  185.74   11.49 
  -1   2  -1  206.15   11.33 
  -1   2  -1  166.99   12.92 
  -1   2  -1  182.59   11.55 
   2   1  -1  187.41   11.65 
  -1   2  -1  175.72   12.91 
  -2  -1  -1  180.81   11.60 
   2   1  -1  188.11   10.93 
  -2  -1  -1  182.04   12.86 
   2   1  -1  176.29   11.55 
   2   1  -1  167.45   12.23 
   1  -2  -1  186.29   11.71 
   1  -2  -1  197.66   11.74 
  -1   2  -1  202.63   11.31 
   1  -2  -1  179.91   11.53 
  -1   2  -1  202.89   11.33 
  -1   2  -1  168.45   12.27 
  -2  -1  -1  193.87   12.88 
   1  -2  -1  171.68   12.25 
   2   1  -1  152.63   12.86 
  -1   2  -1  169.36   11.62 
   1  -2  -1  172.39   12.92 
   1  -2  -1  199.69   11.44 
   2   1  -1  193.98   11.66 
  -2  -1  -1  184.21   12.18 
   2   1  -1  161.26   12.86 
   2   1  -1  184.91   12.23 
  -1   2   1  192.72   11.35 
  -2  -1   1  173.04   11.65 
   2   1   1  185.45   10.87 
  -2  -1   1  177.95   11.59 
   1  -2   1  176.12   12.24 
   2   1   1  163.68   11.48 
  -1   2   1  172.80   12.95 
   1  -2   1  209.38   11.68 
   2   1   1  178.05   11.60 
  -2  -1   1  194.68   11.27 
  -2  -1   1  179.12   12.90 
  -1   2   1  199.40   11.69 
   1  -2   1  184.11   11.77 
  -2  -1   1  186.44   11.28 
   1  -2   1  187.40   11.66 
   1  -2   1  172.29   11.40 
   1  -2   1  192.10   11.69 
  -2  -1   1  193.09   12.23 
   1  -2   1  158.21   12.22 
   1  -2   1  181.79   11.51 
   2   1   1  185.94   12.19 
  -2  -1   1  175.29   11.51 
  -1   2   1  162.81   11.55 
  -1   2   1  178.79   12.30 
  -2  -1   1  169.61   12.89 
   1  -2   1  177.91   12.91 
  -2  -1   1  194.95   11.29 
   2   1   1  208.29   10.89 
   2   0  -1    0.83    0.21 
   2   0  -1    0.40    0.20 
   0   2  -1    0.70    0.22 
   0  -2  -1    0.09    0.19 
   0   2  -1    0.47    0.21 
   2   0  -1    0.63    0.22 
   2   0  -1    1.26    0.23 
   2   0  -1    0.67    0.19 
   2   0  -1    0.43    0.20 
   2   0  -1    0.19    0.18 
   2   0  -1    0.29    0.24 
   2   0  -1    0.58    0.16 
   0   2  -1    0.65    0.24 
   0   2  -1    0.54    0.26 
   0   2  -1    0.97    0.29 
   0  -2  -1    0.48    0.23 
   0  -2  -1    0.31    0.17 
   0  -2  -1    0.88    0.22 
   0  -2  -1    0.48    0.22 
   0  -2  -1    0.74    0.23 
  -2   0   1    0.75    0.15 
   0   2   1    0.59    0.23 
  -2   0   1    0.47    0.15 
  -2   0   1    0.44    0.20 
   0  -2   1    1.16    0.28 
  -2   0   1    0.26    0.18 
   0   2   1    0.33    0.20 
   0   2   1    0.39    0.21 
   0   2   1    0.58    0.22 
   0  -2   1    0.55    0.23 
  -2   0   1    0.56    0.20 
   0  -2   1    0.92    0.22 
   0  -2   1    1.46    0.23 
  -2   0   1    0.75    0.15 
   0  -2   1    0.46    0.23 
   0  -2   1    1.93    0.28 
  -2   0   1    0.41    0.19 
  -2   0   1    0.47    0.15 
   0   2   1    0.58    0.24 
   0   2   1    0.82    0.26 
  -2   0   1    0.33    0.18 
  -1  -2  -1  174.54   11.48 
  -2   1  -1  183.29   12.86 
  -2   1  -1  179.03   11.31 
   1   2  -1  180.70   11.67 
  -2   1  -1  178.82   11.33 
  -1  -2  -1  211.09   11.30 
  -1  -2  -1  189.02   11.67 
   2  -1  -1  188.34   11.54 
  -1  -2  -1  180.34   12.89 
  -2   1  -1  182.19   12.03 
  -1  -2  -1  202.41   11.29 
  -2   1  -1  181.96   11.60 
  -2   1  -1  177.23   12.19 
   2  -1  -1  161.46   12.88 
  -1  -2  -1  202.49   11.28 
   1   2  -1  156.95   12.91 
   2  -1  -1  170.70   12.22 
   2  -1  -1  177.22   11.37 
   2  -1  -1  194.77   11.67 
   1   2  -1  184.55   11.54 
   2  -1  -1  184.02   12.89 
   2  -1  -1  180.19   12.09 
   1   2  -1  176.20   11.61 
  -1  -2  -1  173.56   12.21 
   2  -1  -1  193.68   11.66 
  -1  -2  -1  206.66   12.93 
   2  -1  -1  179.62   11.49 
   1   2  -1  176.90   12.92 
  -2   1  -1  167.81   12.85 
   1   2  -1  182.32   12.29 
   2  -1  -1  207.30   12.28 
  -2   1   1  191.60   11.29 
  -2   1   1  160.88   11.26 
   2  -1   1  206.07   10.88 
  -1  -2   1  174.46   11.52 
  -1  -2   1  171.61   11.29 
  -2   1   1  192.03   11.53 
   1   2   1  180.55   11.50 
   1   2   1  190.85   11.67 
  -2   1   1  161.00   11.24 
  -1  -2   1  184.70   12.25 
   1   2   1  171.79   12.87 
  -1  -2   1  156.34   11.66 
   2  -1   1  184.51   12.85 
   2  -1   1  192.14   12.20 
   1   2   1  163.11   11.54 
  -1  -2   1  171.53   11.31 
  -1  -2   1  171.11   11.31 
  -1  -2   1  157.35   12.92 
   2  -1   1  190.73   11.62 
   2  -1   1  168.31   11.49 
   1   2   1  188.24   12.90 
  -2   1   1  182.14   12.25 
  -2   1   1  177.83   12.89 
   1   2   1  167.45   12.20 
  -2   1   1  196.48   12.93 
  -2   1   1  194.02   11.60 
  -1  -2   1  172.80   12.91 
   1   2   1  174.79   12.25 
   2  -1   1  182.70   12.84 
   2  -1   1  203.57   12.19 
  -2   1   1  191.69   11.31 
   1   2   1  196.10   11.65 
  -2   1   1  199.17   11.65 
  -2   2  -1    1.08    0.26 
  -2  -2  -1    0.53    0.16 
  -2  -2  -1    0.12    0.19 
   2   2  -1   -0.08    0.18 
   2   2  -1    0.42    0.23 
  -2  -2  -1    0.33    0.14 
   2   2  -1    0.58    0.27 
  -2   2  -1    0.32    0.17 
  -2   2  -1    0.49    0.22 
  -2   2  -1    1.20    0.24 
   2  -2  -1    0.03    0.18 
  -2  -2  -1    0.33    0.14 
   2  -2  -1    0.29    0.19 
   2  -2  -1    0.51    0.24 
  -2   2  -1    0.32    0.17 
   2   2  -1    1.10    0.32 
  -2  -2  -1    0.38    0.19 
   2  -2  -1    0.45    0.25 
  -2   2  -1    0.35    0.22 
   2  -2  -1    0.12    0.17 
   2   2  -1    0.51    0.24 
   2  -2  -1   -0.05    0.18 
   2  -2  -1    0.08    0.21 
   2  -2  -1    0.30    0.14 
  -2  -2  -1    0.66    0.22 
   2  -2  -1    0.04    0.18 
  -2  -2  -1    0.22    0.16 
  -2   2  -1    0.10    0.20 
   2   2  -1   -0.21    0.16 
  -2  -2  -1    0.16    0.18 
   2   2  -1    0.25    0.20 
  -2   2  -1    0.18    0.20 
   2   2  -1    0.26    0.22 
   2   2   1    0.36    0.18 
  -2   2   1    0.11    0.23 
  -2   2   1    0.09    0.23 
  -2  -2   1    0.34    0.17 
   2  -2   1    0.49    0.21 
   2   2   1    0.17    0.19 
   2   2   1    0.21    0.17 
   2  -2   1    0.41    0.17 
  -2  -2   1    0.20    0.19 
  -2  -2   1    1.66    0.30 
   2   2   1   -0.07    0.16 
  -2   2   1    0.41    0.22 
   2   2   1    1.32    0.23 
  -2   2   1    0.48    0.18 
  -2   2   1    0.48    0.18 
   2  -2   1    0.27    0.18 
  -2  -2   1    0.57    0.22 
   2  -2   1    0.91    0.24 
  -2  -2   1    0.40    0.28 
   2  -2   1    0.11    0.23 
  -2  -2   1    0.34    0.17 
  -2   2   1    0.55    0.22 
   2   2   1    0.21    0.18 
   2   2   1    0.07    0.14 
   2   2   1    0.32    0.19 
   2  -2   1   -0.03    0.17 
   2  -2   1    0.31    0.21 
   2   2   1    0.61    0.20 
   2   2   1    0.14    0.18 
   2  -2   1    0.27    0.22 
  -2   2   1    0.30    0.21 
  -2  -2   1    0.06    0.20 
  -2   2   1    0.55    0.22 
  -2   2   1   -0.20    0.21 
   2  -2   1    0.29    0.20 
  -2   2   1    0.45    0.23 
  -2   2   1   -0.33    0.19 
  -2  -2   1    0.46    0.24 
  -2   3  -1   31.59    2.57 
  -3  -2  -1   34.11    2.16 
   2  -3  -1   35.09    2.33 
  -2   3  -1   31.70    2.67 
  -2   3  -1   35.61    2.38 
  -3  -2  -1   33.55    2.56 
   3   2  -1   37.85    2.28 
   2  -3  -1   33.48    2.46 
  -3  -2  -1   30.81    2.54 
  -2   3  -1   39.98    2.34 
   2  -3  -1   38.82    2.71 
  -2   3  -1   35.05    2.42 
  -2   3  -1   30.97    2.65 
   3   2  -1   30.94    2.35 
   3   2  -1   32.94    2.40 
   3   2  -1   35.78    2.39 
   2  -3  -1   37.75    2.57 
   3   2  -1   34.55    2.42 
   2  -3  -1   31.49    2.40 
  -2   3  -1   36.80    2.42 
   3   2  -1   30.30    2.51 
   3   2  -1   36.47    2.60 
  -3  -2  -1   34.18    2.32 
   3   2  -1   33.11    2.59 
   3   2  -1   33.04    2.27 
  -3  -2  -1   34.30    2.39 
   2  -3  -1   35.97    2.32 
  -2   3  -1   36.52    2.33 
  -3  -2  -1   31.76    2.25 
   2  -3  -1   38.22    2.44 
  -2   3  -1   40.04    2.34 
   3   2  -1   31.12    2.23 
   2  -3  -1   30.35    2.68 
   2  -3  -1   32.46    2.35 
   3   2   1   36.48    2.48 
   2  -3   1   30.76    2.42 
  -3  -2   1   37.06    2.65 
   2  -3   1   36.60    2.33 
   3   2   1   38.51    2.43 
   3   2   1   35.48    2.30 
   2  -3   1   32.10    2.46 
  -3  -2   1   32.64    2.64 
   2  -3   1   32.92    2.27 
   2  -3   1   33.31    2.34 
  -2   3   1   35.06    2.73 
  -2   3   1   34.54    2.45 
  -2   3   1   33.93    2.60 
   3   2   1   37.66    2.18 
  -3  -2   1   33.67    2.27 
  -2   3   1   32.03    2.67 
   2  -3   1   35.56    2.66 
  -3  -2   1   35.43    2.41 
   3   2   1   36.97    2.17 
   2  -3   1   31.23    2.66 
  -3  -2   1   34.19    2.26 
   3   2   1   34.44    2.48 
   2  -3   1   30.66    2.52 
   2  -3   1   32.47    2.35 
  -3  -2   1   34.97    2.49 
  -3  -2   1   34.18    2.26 
  -2   3   1   31.28    2.40 
  -3  -2   1   37.50    2.37 
  -2   3   1   30.52    2.38 
   2  -3   1   35.65    2.26 
   3   2   1   36.85    2.46 
   3   2   1   37.12    2.33 
   3   1  -1  184.88   12.36 
   1  -3  -1  194.19   11.23 
  -3  -1  -1  182.27   11.13 
   1  -3  -1  155.62   11.08 
   1  -3  -1  185.83   11.31 
  -1   3  -1  162.09   11.13 
  -3  -1  -1  175.60   12.33 
   3   1  -1  150.68   11.73 
  -1   3  -1  194.58   12.49 
  -1   3  -1  173.39   11.24 
   3   1  -1  179.12   12.36 
   1  -3  -1  177.93   12.46 
  -1   3  -1  162.76   11.21 
   3   1  -1  165.48   11.75 
   1  -3  -1  178.49   11.62 
   1  -3  -1  167.09   10.76 
   1  -3  -1  185.14   11.29 
   1  -3  -1  153.69   11.79 
  -3  -1  -1  166.02   12.33 
   1  -3  -1  185.42   11.01 
  -1   3  -1  173.74   10.91 
   3   1  -1  175.07   11.09 
   1  -3  -1  177.35   12.49 
   3   1  -1  184.22   10.51 
   3   1  -1  196.54   10.51 
  -1   3  -1  169.85   12.48 
   3   1  -1  166.10   11.18 
  -1   3  -1  182.25   11.86 
   3   1  -1  182.58   11.10 
   3   1  -1  174.09   11.19 
  -3  -1   1  162.68   10.81 
  -1   3   1  169.35   11.15 
   1  -3   1  163.40   11.33 
   1  -3   1  177.97   11.09 
   1  -3   1  201.14   10.80 
  -1   3   1  156.99   11.23 
   1  -3   1  171.56   10.97 
  -3  -1   1  168.80   10.80 
   1  -3   1  179.88   11.82 
   3   1   1  186.27   11.14 
  -1   3   1  185.44   11.22 
  -3  -1   1  181.16   11.19 
   1  -3   1  177.03   12.48 
   3   1   1  171.86   11.01 
  -1   3   1  156.33   11.84 
   3   1   1  192.65   11.69 
  -3  -1   1  166.07   12.39 
  -3  -1   1  164.46   11.72 
  -3  -1   1  175.18   12.39 
  -3  -1   1  173.35   11.04 
  -3  -1   1  168.96   10.82 
  -1   3   1  169.25   12.48 
   3   1   1  169.53   11.12 
   3   0  -1   10.57    0.87 
   0  -3  -1   10.65    0.91 
   0  -3  -1   12.74    0.96 
   3   0  -1   11.99    0.96 
   3   0  -1   11.65    1.01 
   0  -3  -1   11.37    0.97 
   3   0  -1   11.85    0.96 
   3   0  -1   12.44    0.99 
   3   0  -1   12.37    0.89 
   0  -3  -1   12.25    1.03 
   3   0  -1   11.09    0.97 
   3   0  -1   10.78    0.91 
   0  -3  -1   10.19    1.02 
   0  -3  -1   10.72    0.92 
   0  -3  -1   10.71    0.92 
   0  -3  -1   10.21    0.99 
   0   3  -1   10.94    1.11 
   3   0  -1   10.94    0.92 
   3   0  -1   12.85    0.94 
   0   3  -1   12.99    0.98 
   0   3  -1   11.50    1.09 
   0   3  -1   10.58    0.99 
   0  -3   1    9.98    1.01 
   0   3   1   12.33    1.00 
   0  -3   1   11.96    1.03 
  -3   0   1   11.40    0.96 
  -3   0   1   13.39    0.93 
   0  -3   1   11.52    0.95 
  -3   0   1   14.30    0.86 
   3   0   1   12.44    0.84 
   0  -3   1   10.40    0.94 
   0   3   1   13.63    1.12 
   0  -3   1   11.97    1.01 
  -3   0   1   11.54    1.01 
  -3   0   1   12.50    0.83 
   0  -3   1   12.38    1.10 
  -3   0   1   12.30    1.03 
  -3   0   1   11.87    0.91 
  -3   0   1   14.28    0.86 
   0   3   1   12.13    1.09 
   0   3   1   10.39    1.05 
   3   0   1   12.05    0.84 
   0   3   1   12.50    0.99 
   0   3   1   12.20    1.05 
  -3   0   1   12.52    0.84 
   0  -3   1   12.55    1.04 
   3  -1  -1  190.85   12.65 
   3  -1  -1  175.21   10.71 
   3  -1  -1  179.31   11.23 
  -3   1  -1  171.42   11.91 
   3  -1  -1  172.98   11.87 
   3  -1  -1  182.47   11.44 
  -1  -3  -1  188.50   11.31 
  -3   1  -1  162.85   12.57 
   3  -1  -1  170.21   11.32 
   3  -1  -1  180.85   12.61 
  -1  -3  -1  167.59   12.67 
  -1  -3  -1  178.09   12.02 
   1   3  -1  172.20   11.40 
   1   3  -1  169.14   12.11 
  -1  -3  -1  165.29   11.48 
   1   3  -1  173.25   12.72 
  -3   1  -1  179.94   12.59 
   3  -1  -1  187.03   11.42 
  -3   1  -1  169.95   11.34 
   3  -1  -1  184.36   11.32 
   3  -1  -1  174.74   12.02 
  -1  -3  -1  180.69   11.08 
   1   3  -1  176.20   11.41 
  -1  -3  -1  160.99   12.68 
   3  -1  -1  193.10   12.00 
  -1  -3  -1  184.09   11.00 
   1   3  -1  179.03   11.37 
  -3   1  -1  177.78   11.34 
  -1  -3  -1  180.74   11.10 
  -1  -3  -1  206.15   11.13 
   1   3  -1  170.02   11.47 
   3  -1  -1  176.96   10.72 
  -1  -3   1  169.27   12.03 
  -1  -3   1  187.91   12.04 
  -1  -3   1  148.93   11.30 
  -1  -3   1  160.35   12.70 
   3  -1   1  187.27   10.65 
   3  -1   1  178.70   11.26 
   1   3   1  189.87   11.33 
  -3   1   1  159.58   11.04 
   3  -1   1  176.14   11.36 
  -1  -3   1  155.62   12.69 
   3  -1   1  195.22   11.92 
  -3   1   1  182.43   12.02 
  -3   1   1  188.79   11.42 
   1   3   1  177.19   12.67 
  -3   1   1  183.57   11.04 
  -3   1   1  195.53   11.31 
   1   3   1  182.64   11.40 
   1   3   1  181.83   10.78 
  -3   1   1  177.94   12.64 
   1   3   1  154.63   12.67 
  -1  -3   1  189.90   10.98 
  -3   1   1  159.61   11.06 
  -3   1   1  183.34   11.02 
   3  -1   1  192.05   11.59 
   3  -1   1  189.17   10.64 
   1   3   1  178.83   12.09 
  -3   1   1  196.03   12.69 
   2   3  -1   31.95    2.65 
  -3   2  -1   34.95    2.26 
   3  -2  -1   35.28    2.67 
   2   3  -1   34.15    2.61 
   3  -2  -1   33.89    2.43 
   2   3  -1   29.38    2.66 
  -3   2  -1   34.96    2.25 
  -3   2  -1   41.09    2.66 
   2   3  -1   32.33    2.37 
  -2  -3  -1   33.55    2.28 
  -3   2  -1   31.55    2.25 
   3  -2  -1   35.78    2.34 
   3  -2  -1   37.14    2.29 
  -2  -3  -1   33.51    2.28 
  -3   2  -1   39.01    2.38 
  -3   2  -1   33.55    2.60 
   2   3  -1   33.04    2.33 
   3  -2  -1   35.29    2.45 
  -2  -3  -1   35.73    2.66 
  -2  -3  -1   32.52    2.63 
   2   3  -1   32.21    2.42 
  -3   2  -1   35.60    2.50 
  -3   2  -1   33.27    2.34 
   2   3  -1   35.68    2.49 
  -2  -3  -1   36.58    2.50 
  -3   2  -1   36.73    2.36 
  -2  -3  -1   34.14    2.30 
  -2  -3  -1   34.26    2.43 
   3  -2  -1   34.39    2.53 
  -2  -3  -1   35.16    2.37 
   3  -2  -1   32.14    2.62 
  -2  -3  -1   33.62    2.34 
  -2  -3   1   38.22    2.56 
  -2  -3   1   38.95    2.56 
  -3   2   1   35.42    2.33 
   3  -2   1   35.51    2.36 
   2   3   1   37.78    2.44 
  -2  -3   1   37.27    2.75 
   2   3   1   35.74    2.63 
   2   3   1   37.19    2.44 
  -3   2   1   35.35    2.32 
  -2  -3   1   38.28    2.35 
  -2  -3   1   37.43    2.35 
   3  -2   1   32.94    2.47 
   2   3   1   33.60    2.25 
   3  -2   1   33.93    2.38 
   2   3   1   35.70    2.66 
  -2  -3   1   31.92    2.67 
  -3   2   1   32.08    2.28 
  -3   2   1   32.04    2.28 
  -3   2   1   33.78    2.33 
  -3   2   1   33.66    2.39 
  -2  -3   1   38.01    2.48 
   3  -2   1   32.20    2.57 
  -3   2   1   37.30    2.42 
   2   3   1   34.84    2.56 
   3  -2   1   32.04    2.46 
   3  -2   1   35.08    2.38 
   3  -2   1   32.82    2.50 
  -2  -3   1   38.30    2.35 
  -2  -3   1   33.67    2.39 
   2   3   1   35.46    2.32 
   3  -2   1   33.66    2.58 
  -3   2   1   32.93    2.67 
   3  -2   1   34.05    2.59 
   2   3   1   32.22    2.27 
  -3   2   1   33.17    2.56 
   3  -2   1   33.19    2.24 
  -2  -3   1   33.50    2.34 
   3  -2   1   35.45    2.23 
   2   3   1   33.82    2.39 
  -3   2   1   34.33    2.66 
   3   3  -1    0.15    0.28 
  -3   3  -1    0.06    0.21 
  -3   3  -1    0.82    0.24 
  -3  -3  -1   -0.06    0.22 
   3  -3  -1    0.34    0.19 
  -3  -3  -1    0.72    0.20 
   3   3  -1    0.36    0.27 
  -3  -3  -1    0.33    0.21 
   3  -3  -1    0.47    0.24 
   3  -3  -1   -0.12    0.24 
   3  -3  -1    0.53    0.27 
  -3   3  -1    0.31    0.25 
  -3  -3  -1    0.08    0.30 
  -3  -3  -1    1.19    0.30 
   3   3  -1    2.52    0.44 
   3  -3  -1    0.15    0.20 
  -3  -3  -1    0.72    0.20 
   3  -3  -1    0.27    0.25 
  -3  -3  -1    0.44    0.28 
  -3  -3  -1    0.06    0.18 
   3   3  -1    0.69    0.30 
  -3   3  -1   -0.09    0.19 
  -3   3  -1    0.82    0.24 
   3  -3  -1    0.40    0.30 
  -3   3  -1   -0.02    0.21 
  -3   3  -1    0.14    0.25 
   3   3  -1    0.32    0.20 
   3   3  -1    0.93    0.32 
  -3  -3  -1    0.64    0.25 
   3  -3  -1    0.31    0.28 
  -3   3  -1    0.00    0.21 
   3   3  -1    0.32    0.22 
   3  -3  -1   -0.07    0.22 
  -3   3  -1    0.23    0.27 
   3   3   1    0.35    0.23 
  -3  -3   1    0.36    0.27 
  -3  -3   1    0.47    0.31 
  -3   3   1   -0.14    0.18 
   3  -3   1    0.31    0.18 
   3  -3   1    0.33    0.25 
  -3   3   1    0.27    0.29 
  -3  -3   1   -0.03    0.25 
   3  -3   1    0.74    0.28 
   3   3   1    0.67    0.26 
  -3   3   1    0.10    0.23 
   3   3   1    0.13    0.23 
   3  -3   1    0.37    0.28 
   3  -3   1    0.49    0.27 
  -3  -3   1    1.18    0.30 
   3  -3   1    0.35    0.30 
   3   3   1    0.19    0.19 
   3   3   1    0.48    0.26 
   3   3   1    0.33    0.18 
   3  -3   1    0.30    0.32 
  -3   3   1    0.17    0.26 
  -3  -3   1    0.47    0.22 
  -3   3   1    0.23    0.20 
   3   3   1    0.17    0.24 
  -3   3   1    0.06    0.25 
  -3  -3   1    0.01    0.25 
   3  -3   1    0.22    0.28 
   3  -3   1    0.06    0.21 
  -3   3   1    0.02    0.25 
  -3   3   1    0.23    0.20 
   3  -3   1    0.30    0.24 
  -3  -3   1    0.05    0.25 
   3   3   1    0.15    0.21 
  -3  -3   1    0.17    0.23 
   3   3   1    0.23    0.23 
  -3   3   1    0.81    0.37 
  -3  -3   1    0.47    0.22 
  -3   4  -1  182.44   11.98 
  -4  -3  -1  179.79   13.16 
  -3   4  -1  176.30   13.26 
  -3   4  -1  200.08   11.95 
   4   3  -1  187.27   13.16 
   3  -4  -1  188.11   12.07 
   3  -4  -1  199.51   12.30 
   4   3  -1  163.58   11.90 
   3  -4  -1  170.93   13.30 
  -3   4  -1  197.77   11.63 
  -4  -3  -1  183.34   11.47 
  -4  -3  -1  180.42   11.87 
   3  -4  -1  182.17   13.26 
  -3   4  -1  188.35   11.90 
   3  -4  -1  179.39   11.44 
   4   3  -1  187.55   11.88 
  -4  -3  -1  195.21   11.73 
   3  -4  -1  173.83   11.78 
  -3   4  -1  179.41   12.64 
  -4  -3  -1  180.48   12.40 
  -3   4  -1  185.62   11.59 
   4   3  -1  193.20   11.63 
   3  -4  -1  198.09   13.34 
  -4  -3  -1  188.59   11.46 
   3  -4  -1  204.21   12.12 
   4   3  -1  178.84   12.58 
  -3   4  -1  203.31   13.34 
  -3   4  -1  184.99   11.61 
  -4  -3  -1  201.50   11.46 
  -4  -3  -1  184.97   13.14 
  -4  -3  -1  188.48   11.44 
   3  -4  -1  169.85   11.64 
   3  -4  -1  165.71   12.57 
   4   3  -1  187.22   13.15 
   4   3  -1  186.27   11.21 
   3  -4  -1  201.57   11.29 
   4   3  -1  172.94   11.20 
   4   3  -1  182.16   11.82 
  -3   4   1  174.31   11.59 
   3  -4   1  170.23   12.00 
  -3   4   1  208.30   12.04 
  -4  -3   1  165.82   13.22 
  -4  -3   1  194.06   12.50 
   4   3   1  187.92   12.46 
  -4  -3   1  178.89   13.22 
   4   3   1  176.78   11.85 
  -3   4   1  174.08   11.61 
   3  -4   1  189.39   11.55 
   4   3   1  191.40   13.04 
   3  -4   1  178.61   11.48 
  -3   4   1  191.98   11.99 
  -3   4   1  186.83   11.94 
  -3   4   1  173.24   11.65 
   3  -4   1  178.78   12.55 
   4   3   1  177.61   11.11 
   3  -4   1  192.16   13.25 
   4   3   1  189.22   13.04 
  -4  -3   1  202.42   11.81 
   3  -4   1  185.77   12.13 
  -3   4   1  168.84   13.31 
   3  -4   1  173.31   11.27 
   3  -4   1  178.07   11.76 
  -4  -3   1  186.38   12.48 
   3  -4   1  173.51   13.25 
   3  -4   1  184.16   11.55 
   4   3   1  194.25   12.51 
  -3   4   1  171.48   13.28 
  -4  -3   1  195.56   11.56 
  -4  -3   1  180.73   11.55 
  -4  -3   1  180.75   11.53 
  -3   4   1  174.44   12.67 
  -4  -3   1  181.35   11.95 
   3  -4   1  188.95   11.26 
  -4  -3   1  197.67   11.39 
   4   3   1  191.03   11.80 
  -2   4  -1  156.63   10.27 
   2  -4  -1  169.61   10.02 
   4   2  -1  135.20   10.16 
   2  -4  -1  145.54    9.80 
  -2   4  -1  169.68    9.95 
  -4  -2  -1  161.10   11.19 
  -2   4  -1  171.29   10.25 
   2  -4  -1  172.22   10.82 
   2  -4  -1  156.85   11.36 
   2  -4  -1  164.70   10.17 
   2  -4  -1  164.68   10.35 
   2  -4  -1  148.49   10.11 
   4   2  -1  167.65   11.21 
  -2   4  -1  149.02   11.40 
   2  -4  -1  164.81   10.53 
  -4  -2  -1  153.39   10.09 
  -2   4  -1  154.22   10.19 
   4   2  -1  181.99   10.23 
  -2   4  -1  169.04    9.96 
   4   2  -1  146.13   10.71 
   4   2  -1  168.26   11.23 
  -2   4  -1  156.71   10.86 
  -4  -2  -1  138.67   11.18 
  -2   4  -1  148.07    9.93 
   2  -4  -1  147.22   11.39 
   4   2  -1  164.37   10.12 
   4   2  -1  142.26    9.54 
   4   2  -1  137.32   10.11 
   4   2  -1  153.49    9.54 
   2  -4  -1  153.13   10.32 
  -4  -2   1  171.79    9.85 
  -2   4   1  166.85    9.98 
   2  -4   1  154.38   11.39 
  -2   4   1  130.36   11.36 
  -4  -2   1  168.26   10.07 
  -4  -2   1  181.14   10.21 
   2  -4   1  157.55   10.78 
   2  -4   1  179.64   11.40 
  -2   4   1  145.45   10.84 
   2  -4   1  158.90   10.10 
   4   2   1  151.36   10.02 
   4   2   1  154.49   10.62 
  -2   4   1  160.59   11.40 
   2  -4   1  150.74    9.96 
   2  -4   1  149.74   10.29 
   2  -4   1  175.55    9.66 
  -4  -2   1  159.26   11.30 
  -2   4   1  145.09   10.23 
   4   2   1  155.49    9.45 
   2  -4   1  162.64    9.85 
  -4  -2   1  171.61    9.84 
   4   2   1  155.49   10.09 
  -4  -2   1  150.79   11.28 
   4   2   1  165.01    9.46 
  -4  -2   1  154.24   10.65 
  -2   4   1  149.63   10.27 
  -4  -2   1  168.49    9.84 
   2  -4   1  148.23   10.36 
   4   2   1  149.26   10.08 
   1  -4  -1   33.64    2.48 
   4   1  -1   34.12    2.54 
   4   1  -1   38.31    2.39 
   4   1  -1   37.59    2.53 
  -1   4  -1   37.14    2.68 
  -1   4  -1   38.20    2.41 
   4   1  -1   31.98    2.23 
  -4  -1  -1   35.36    2.49 
  -4  -1  -1   30.54    2.48 
   1  -4  -1   31.65    2.41 
   1  -4  -1   34.77    2.37 
  -1   4  -1   36.43    2.78 
  -1   4  -1   37.60    2.50 
   4   1  -1   38.31    2.40 
   1  -4  -1   35.11    2.79 
   1  -4  -1   32.15    2.41 
   4   1  -1   34.74    2.37 
   4   1  -1   33.69    2.50 
   1  -4  -1   36.39    2.62 
   1  -4  -1   35.75    2.41 
   4   1  -1   36.65    2.56 
  -1   4  -1   36.68    2.46 
   4   1  -1   34.01    2.37 
   4   1  -1   33.19    2.22 
  -1   4  -1   36.40    2.51 
   1  -4  -1   35.61    2.74 
  -4  -1   1   34.04    2.62 
   1  -4   1   34.77    2.74 
  -4  -1   1   33.58    2.37 
   1  -4   1   36.52    2.43 
  -1   4   1   26.93    2.44 
   4   1   1   35.60    2.36 
  -4  -1   1   34.20    2.23 
   1  -4   1   34.50    2.36 
  -4  -1   1   30.67    2.23 
  -4  -1   1   30.62    2.23 
  -4  -1   1   35.25    2.33 
  -1   4   1   36.64    2.70 
   4   1   1   33.32    2.37 
  -1   4   1   32.80    2.52 
  -1   4   1   33.88    2.47 
   1  -4   1   32.21    2.48 
   1  -4   1   32.08    2.74 
  -4  -1   1   32.17    2.61 
   1  -4   1   37.65    2.44 
   4   1   1   35.17    2.25 
   4   1   1   35.54    2.24 
  -4  -1   1   33.60    2.45 
   1  -4   1   34.42    2.52 
   0   4  -1    4.61    0.68 
   4   0  -1    4.57    0.50 
   0  -4  -1    4.62    0.54 
   0   4  -1    5.73    0.63 
   4   0  -1    6.02    0.49 
   0  -4  -1    3.70    0.58 
   4   0  -1    4.82    0.49 
   4   0  -1    4.18    0.47 
  -4   0  -1    4.81    0.40 
   4   0  -1    5.75    0.55 
   4   0  -1    4.12    0.51 
   0   4  -1    4.94    0.72 
   0  -4  -1    4.46    0.63 
   0   4  -1    4.21    0.61 
   0  -4  -1    4.68    0.64 
  -4   0  -1    4.68    0.42 
   4   0  -1    5.17    0.55 
   4   0  -1    4.65    0.53 
   0   4  -1    4.38    0.65 
   0   4  -1    5.07    0.60 
   0  -4  -1    4.45    0.63 
   4   0  -1    4.73    0.55 
   0   4  -1    4.48    0.64 
   4   0  -1    4.97    0.49 
   0  -4  -1    4.55    0.57 
   0  -4  -1    3.91    0.52 
   0   4   1    4.86    0.66 
  -4   0   1    4.11    0.49 
   0  -4   1    3.70    0.55 
   0  -4   1    3.52    0.59 
   4   0   1    4.54    0.40 
   4   0   1    4.88    0.40 
   0  -4   1    6.02    0.69 
   4   0   1    5.32    0.40 
  -4   0   1    4.33    0.48 
   0   4   1    3.73    0.58 
  -4   0   1    5.19    0.52 
   0  -4   1    3.96    0.64 
   0   4   1    4.75    0.60 
   0  -4   1    4.70    0.55 
   0   4   1    6.55    0.76 
  -4   0   1    5.65    0.46 
  -4   0   1    4.22    0.41 
   0   4   1    4.46    0.65 
  -4   0   1    4.89    0.58 
  -4   0   1    5.66    0.46 
   4   0   1    5.00    0.41 
   0   4   1    3.04    0.57 
  -4   0   1    4.22    0.41 
   0  -4   1    4.53    0.60 
  -4   0   1    4.28    0.54 
   0  -4   1    3.86    0.58 
   4  -1  -1   31.98    2.41 
  -1  -4  -1   34.07    2.37 
  -4   1  -1   36.15    2.57 
   1   4  -1   37.74    2.53 
   4  -1  -1   31.64    2.38 
  -1  -4  -1   33.11    2.43 
  -1  -4  -1   32.04    2.50 
  -1  -4  -1   37.53    2.42 
   4  -1  -1   38.50    2.59 
  -1  -4  -1   39.55    2.81 
   1   4  -1   30.07    2.73 
  -1  -4  -1   34.16    2.39 
   4  -1  -1   33.47    2.27 
  -1  -4  -1   37.14    2.49 
  -1  -4  -1   31.32    2.72 
  -4   1  -1   34.32    2.30 
  -1  -4  -1   34.07    2.37 
  -4   1  -1   33.54    2.30 
  -1  -4  -1   33.44    2.41 
   4  -1  -1   34.57    2.27 
   4  -1  -1   35.37    2.60 
   4  -1  -1   37.00    2.43 
  -4   1  -1   34.21    2.39 
  -4   1  -1   33.81    2.57 
   1   4  -1   31.08    2.39 
   4  -1  -1   35.82    2.41 
   1   4  -1   36.92    2.81 
   1   4  -1   37.23    2.49 
   4  -1  -1   33.49    2.52 
   4  -1  -1   34.53    2.62 
   1   4  -1   34.74    2.41 
  -1  -4  -1   34.78    2.59 
  -4   1   1   34.59    2.65 
   4  -1   1   34.16    2.32 
   4  -1   1   38.04    2.17 
   4  -1   1   33.85    2.30 
  -4   1   1   37.51    2.32 
  -4   1   1   32.87    2.67 
  -1  -4   1   31.95    2.41 
   4  -1   1   34.69    2.43 
   1   4   1   38.71    2.76 
  -4   1   1   39.41    2.56 
   1   4   1   33.76    2.47 
  -1  -4   1   36.48    2.44 
   1   4   1   36.28    2.78 
  -1  -4   1   33.01    2.76 
   4  -1   1   36.40    2.16 
  -4   1   1   37.49    2.32 
   1   4   1   33.51    2.37 
  -4   1   1   35.39    2.27 
  -1  -4   1   37.37    2.56 
  -1  -4   1   34.14    2.43 
  -4   1   1   36.75    2.40 
  -4   1   1   34.65    2.39 
   1   4   1   31.46    2.65 
  -1  -4   1   35.44    2.62 
   1   4   1   34.18    2.53 
   1   4   1   33.39    2.45 
  -1  -4   1   35.09    2.81 
  -4   1   1   35.35    2.27 
   1   4   1   30.69    2.44 
   4  -1   1   32.35    2.31 
   2   4  -1  153.48   10.25 
  -4   2  -1  156.60   10.13 
  -4   2  -1  141.58    9.79 
   4  -2  -1  175.24   11.31 
   2   4  -1  183.73   11.44 
  -4   2  -1  148.48   10.02 
  -4   2  -1  141.65    9.78 
  -2  -4  -1  170.29    9.93 
   4  -2  -1  148.26   10.21 
  -2  -4  -1  149.19    9.85 
   4  -2  -1  157.60   10.11 
   4  -2  -1  162.46    9.59 
  -2  -4  -1  160.81   10.28 
   2   4  -1  167.84   11.38 
  -4   2  -1  151.17   10.12 
  -4   2  -1  145.98   10.63 
   2   4  -1  159.87   10.87 
  -4   2  -1  168.57   10.45 
  -4   2  -1  153.73    9.80 
  -2  -4  -1  158.53   10.73 
   4  -2  -1  177.31   10.74 
  -2  -4  -1  162.29   10.10 
  -2  -4  -1  164.36    9.89 
   4  -2  -1  157.58   10.54 
  -4   2  -1  147.97   11.24 
  -2  -4  -1  156.89   11.36 
   4  -2  -1  153.90   11.24 
  -4   2  -1  135.62   11.20 
   4  -2  -1  167.88   10.18 
   2   4  -1  149.73   10.13 
   4  -2  -1  164.69    9.98 
   2   4  -1  162.23   10.26 
  -2  -4  -1  164.41    9.91 
   4  -2  -1  173.66    9.61 
  -4   2  -1  153.50    9.82 
  -2  -4  -1  142.95   11.32 
  -4   2   1  166.21   10.10 
  -2  -4   1  148.03   11.37 
  -4   2   1  155.02    9.88 
  -2  -4   1  161.85   10.77 
  -2  -4   1  135.79   10.09 
  -4   2   1  150.93   11.32 
  -2  -4   1  153.81   10.30 
   2   4   1  178.04    9.64 
   4  -2   1  177.22   10.10 
  -4   2   1  147.98    9.85 
  -4   2   1  149.70   10.18 
  -4   2   1  164.34   10.12 
   2   4   1  138.91   10.06 
   4  -2   1  154.98   11.17 
   4  -2   1  163.71    9.53 
  -2  -4   1  165.16    9.84 
   2   4   1  156.30   10.19 
   2   4   1  164.79   11.31 
   4  -2   1  165.04   11.17 
  -2  -4   1  168.62    9.96 
  -2  -4   1  168.56    9.95 
   2   4   1  161.47   10.82 
  -4   2   1  145.88   11.29 
   4  -2   1  158.66   10.16 
   4  -2   1  140.18   10.34 
   4  -2   1  162.81    9.71 
  -4   2   1  148.16    9.83 
   4  -2   1  149.90   10.64 
   2   4   1  144.69   10.21 
   4  -2   1  147.49    9.49 
  -2  -4   1  147.38   11.38 
  -2  -4   1  147.76   10.03 
   2   4   1  147.41   11.32 
   4  -2   1  181.35   10.71 
   2   4   1  185.69    9.68 
  -4   2   1  172.94   10.75 
  -4   2   1  155.04    9.90 
  -4   3  -1  179.95   12.58 
   4  -3  -1  206.65   13.26 
   4  -3  -1  170.90   11.76 
   3   4  -1  191.07   12.02 
  -3  -4  -1  190.94   11.59 
   3   4  -1  187.43   13.27 
   4  -3  -1  172.07   11.24 
   3   4  -1  183.32   13.29 
   3   4  -1  160.78   11.79 
  -4   3  -1  184.60   11.94 
   4  -3  -1  180.76   12.02 
  -3  -4  -1  175.66   11.99 
  -4   3  -1  183.81   11.94 
   3   4  -1  215.06   11.37 
   4  -3  -1  201.84   11.40 
  -3  -4  -1  193.77   11.56 
  -3  -4  -1  190.12   12.54 
   4  -3  -1  182.91   13.28 
   3   4  -1  182.28   12.70 
  -3  -4  -1  190.97   11.57 
  -4   3  -1  190.32   13.25 
  -3  -4  -1  160.58   13.23 
  -3  -4  -1  181.50   13.26 
  -4   3  -1  158.14   13.22 
  -3  -4  -1  182.63   11.60 
   4  -3  -1  191.40   12.33 
  -4   3  -1  172.72   11.84 
  -3  -4  -1  203.73   11.83 
  -4   3  -1  188.07   11.60 
  -4   3  -1  193.81   11.56 
   4  -3  -1  195.83   12.61 
   4  -3  -1  187.38   11.29 
  -4   3  -1  194.11   11.58 
   3   4  -1  163.63   11.94 
   4  -3   1  217.68   11.95 
   3   4   1  177.09   11.90 
   4  -3   1  181.34   11.23 
   3   4   1  191.38   11.97 
  -3  -4   1  200.08   11.90 
   4  -3   1  190.86   11.65 
   4  -3   1  184.04   12.15 
  -4   3   1  188.72   11.64 
  -3  -4   1  197.03   12.05 
  -4   3   1  174.51   11.98 
  -4   3   1  153.47   13.23 
  -3  -4   1  182.65   11.62 
  -4   3   1  188.91   11.66 
   4  -3   1  171.87   11.36 
  -4   3   1  182.97   11.90 
   3   4   1  192.86   13.22 
   3   4   1  191.23   12.63 
   4  -3   1  207.51   11.46 
   3   4   1  182.31   11.24 
  -4   3   1  193.15   11.60 
  -4   3   1  196.34   11.94 
   4  -3   1  185.49   13.19 
  -4   3   1  190.29   12.65 
  -3  -4   1  159.12   13.29 
   4  -3   1  182.77   11.93 
  -4   3   1  180.80   13.33 
   4  -3   1  181.34   11.98 
   4  -3   1  177.32   11.20 
   3   4   1  177.86   13.23 
   3   4   1  189.43   11.72 
   3   4   1  173.88   11.23 
  -3  -4   1  182.66   11.64 
  -3  -4   1  198.71   13.33 
  -3  -4   1  176.59   12.58 
  -3  -4   1  186.64   11.66 
  -4   3   1  192.90   11.62 
   4  -3   1  193.96   13.22 
  -4   3   1  174.44   11.64 
  -3  -4   1  165.85   11.46 
   4  -3   1  196.48   12.56 
   4  -4  -1    0.07    0.30 
   4   4  -1    0.39    0.38 
  -4   4  -1    0.39    0.33 
  -4  -4  -1    0.43    0.26 
  -4   4  -1    0.37    0.31 
   4  -4  -1    0.20    0.31 
  -4  -4  -1    0.38    0.25 
   4   4  -1    0.64    0.37 
  -4  -4  -1    0.50    0.31 
   4  -4  -1   -0.26    0.31 
  -4   4  -1    1.31    0.45 
  -4  -4  -1    0.51    0.31 
  -4  -4  -1   -0.02    0.38 
  -4   4  -1   -0.08    0.31 
  -4  -4  -1    0.47    0.33 
   4   4  -1   -0.13    0.23 
   4   4  -1    1.42    0.51 
   4  -4  -1   -0.22    0.24 
   4   4  -1    0.39    0.32 
  -4   4  -1    0.40    0.38 
   4   4  -1    1.47    0.49 
   4   4  -1    0.16    0.34 
  -4  -4  -1    0.05    0.29 
   4  -4  -1    1.70    0.46 
   4   4  -1    0.20    0.27 
  -4   4  -1    0.33    0.27 
   4  -4  -1   -0.45    0.45 
   4  -4  -1    0.54    0.36 
   4   4  -1   -0.15    0.30 
  -4   4  -1    0.88    0.38 
   4  -4  -1   -0.30    0.28 
  -4  -4  -1    0.15    0.33 
   4  -4  -1   -0.13    0.32 
   4  -4  -1    0.43    0.40 
  -4   4  -1    1.23    0.41 
   4  -4  -1   -0.09    0.22 
   4   4  -1    0.54    0.36 
  -4   4  -1    0.33    0.27 
   4  -4  -1   -0.25    0.34 
  -4  -4  -1    0.38    0.25 
   4  -4   1    0.07    0.29 
  -4   4   1   -0.10    0.29 
  -4   4   1    0.44    0.34 
   4  -4   1    0.02    0.48 
   4   4   1    0.11    0.32 
   4  -4   1    0.27    0.39 
   4   4   1   -0.12    0.23 
   4  -4   1   -0.18    0.27 
  -4   4   1    0.81    0.34 
  -4  -4   1   -0.02    0.29 
   4  -4   1   -0.02    0.35 
   4   4   1    0.78    0.33 
   4  -4   1    0.45    0.34 
  -4   4   1    0.76    0.44 
  -4   4   1    0.81    0.34 
  -4  -4   1   -0.36    0.32 
   4   4   1    0.76    0.34 
  -4   4   1    0.54    0.41 
   4   4   1    0.14    0.34 
  -4  -4   1    0.27    0.33 
   4  -4   1    0.69    0.35 
  -4   4   1    0.24    0.32 
   4  -4   1    0.79    0.41 
  -4  -4   1   -0.03    0.23 
   4   4   1    0.44    0.31 
   4  -4   1    0.11    0.33 
   4   4   1    0.19    0.32 
  -4  -4   1   -0.03    0.23 
  -4  -4   1    0.33    0.36 
  -4   4   1    0.15    0.28 
  -4  -4   1    0.60    0.41 
  -4  -4   1    0.07    0.31 
   4  -4   1    0.76    0.36 
  -4  -4   1   -0.23    0.25 
   4  -4   1    0.37    0.26 
  -4   4   1    0.18    0.35 
   4  -4   1    0.90    0.38 
  -5  -4  -1   18.87    1.42 
   4  -5  -1   16.30    1.41 
   4  -5  -1   18.01    1.50 
  -4   5  -1   17.41    1.59 
   4  -5  -1   15.41    1.44 
   5   4  -1   15.81    1.52 
   5   4  -1   16.16    1.39 
   5   4  -1   18.64    1.45 
   5   4  -1   18.17    1.41 
  -5  -4  -1   15.94    1.54 
   5   4  -1   17.79    1.50 
   5   4  -1   16.92    1.44 
  -4   5  -1   18.17    1.47 
  -4   5  -1   15.73    1.40 
  -4   5  -1   16.29    1.51 
   5   4  -1   19.14    1.41 
   4  -5  -1   11.20    1.47 
   4  -5  -1   16.87    1.26 
   4  -5  -1   18.54    1.67 
   5   4  -1   15.85    1.57 
  -5  -4  -1   15.21    1.30 
  -5  -4  -1   18.99    1.31 
   4  -5  -1   16.96    1.44 
  -5  -4  -1   18.98    1.31 
   4  -5  -1   15.96    1.47 
   4  -5  -1   16.91    1.60 
   4  -5  -1   17.13    1.59 
   4  -5  -1   17.65    1.33 
  -5  -4  -1   17.19    1.55 
   4  -5  -1   17.88    1.73 
  -5  -4  -1   18.31    1.52 
  -4   5  -1   15.73    1.40 
  -4   5  -1   17.60    1.64 
   5   4  -1   18.38    1.43 
   4  -5  -1   15.51    1.42 
  -4   5  -1   18.66    1.52 
  -4   5  -1   13.79    1.60 
  -4   5  -1   16.97    1.69 
  -4   5   1   19.46    1.74 
   4  -5   1   18.81    1.64 
   5   4   1   16.26    1.35 
  -4   5   1   18.93    1.72 
  -5  -4   1   16.57    1.47 
  -4   5   1   17.68    1.74 
  -4   5   1   16.83    1.52 
   4  -5   1   23.48    1.78 
   4  -5   1   17.21    1.37 
   5   4   1   16.12    1.44 
   5   4   1   15.73    1.30 
   5   4   1   15.64    1.35 
  -5  -4   1   18.26    1.38 
  -4   5   1   18.67    1.58 
  -5  -4   1   18.80    1.43 
   4  -5   1   17.59    1.43 
   4  -5   1   16.97    1.56 
   4  -5   1   15.45    1.50 
   4  -5   1   15.98    1.40 
  -5  -4   1   15.62    1.45 
   5   4   1   17.50    1.50 
   4  -5   1   20.36    1.51 
  -4   5   1   17.86    1.63 
   4  -5   1   17.21    1.55 
   5   4   1   13.21    1.24 
  -5  -4   1   15.33    1.58 
  -5  -4   1   17.29    1.67 
  -5  -4   1   16.21    1.40 
  -4   5   1   17.16    1.53 
   4  -5   1   19.94    1.56 
   4  -5   1   17.13    1.44 
   4  -5   1   19.55    1.67 
  -5  -4   1   16.45    1.44 
  -5  -4   1   18.24    1.38 
   3  -5  -1   13.42    1.37 
   3  -5  -1    9.72    1.08 
  -3   5  -1   12.35    1.14 
   3  -5  -1   13.37    1.10 
   5   3  -1   13.86    1.13 
   3  -5  -1   12.37    1.20 
  -3   5  -1   10.81    1.15 
   3  -5  -1   11.75    1.31 
   3  -5  -1    9.71    1.08 
   3  -5  -1    9.75    1.07 
   3  -5  -1   12.34    1.21 
  -3   5  -1   12.70    1.26 
   5   3  -1   14.11    1.10 
  -3   5  -1   12.72    1.32 
  -5  -3  -1   11.70    0.90 
  -3   5  -1   13.46    1.36 
  -5  -3  -1   11.70    0.90 
  -5  -3  -1   13.38    1.04 
   3  -5  -1   11.46    1.15 
  -5  -3  -1   11.89    1.13 
   3  -5  -1   12.19    1.26 
   5   3  -1   12.89    1.12 
   3  -5  -1   14.27    1.32 
   5   3  -1   13.83    1.17 
   5   3  -1   11.76    1.05 
  -5  -3  -1   12.45    1.02 
   3  -5  -1   13.10    1.07 
   5   3  -1   12.68    1.20 
  -5  -3  -1   12.69    0.94 
   3  -5  -1   10.52    1.29 
  -3   5  -1   11.27    1.19 
   3  -5  -1   12.98    1.26 
  -3   5  -1   13.57    1.16 
  -3   5  -1   12.34    1.14 
  -5  -3  -1   11.98    1.12 
  -3   5  -1   13.33    1.40 
   5   3  -1   12.27    1.20 
   5   3  -1   17.70    1.18 
  -5  -3  -1   10.31    1.08 
   3  -5   1   13.70    1.29 
   5   3   1   12.89    1.00 
  -3   5   1   13.40    1.36 
   3  -5   1   11.95    1.20 
   3  -5   1   11.88    1.10 
   5   3   1    9.72    0.91 
  -5  -3   1   11.08    1.00 
   5   3   1   12.44    1.08 
  -3   5   1   13.99    1.25 
  -3   5   1   14.01    1.25 
   5   3   1   12.11    1.07 
   3  -5   1   13.66    1.19 
  -5  -3   1   12.31    1.05 
   3  -5   1   13.25    1.29 
   3  -5   1   12.76    1.34 
  -5  -3   1   12.99    1.05 
   5   3   1   12.37    1.10 
  -3   5   1   10.21    1.21 
  -3   5   1   15.03    1.41 
  -5  -3   1   13.52    1.13 
  -3   5   1   13.25    1.17 
  -5  -3   1   11.51    1.08 
   3  -5   1   15.04    1.16 
  -5  -3   1   11.06    1.06 
   3  -5   1   13.81    1.14 
  -5  -3   1   11.23    1.20 
   3  -5   1   10.43    1.19 
   3  -5   1   11.75    0.98 
  -3   5   1   12.07    1.37 
   5   3   1   10.87    0.93 
   3  -5   1   12.46    1.17 
  -5  -3   1   11.09    1.00 
  -5  -3   1   12.99    1.12 
   3  -5   1   14.19    1.26 
  -5  -3   1   10.69    1.21 
  -5  -2  -1   35.08    2.59 
   2  -5  -1   33.54    2.68 
   5   2  -1   39.73    2.53 
   5   2  -1   36.11    2.69 
   5   2  -1   38.92    2.85 
   2  -5  -1   44.20    3.21 
  -2   5  -1   37.38    2.84 
  -2   5  -1   39.39    2.76 
   2  -5  -1   38.00    3.17 
   2  -5  -1   36.06    2.76 
   2  -5  -1   36.46    2.69 
   2  -5  -1   38.16    2.71 
   5   2  -1   35.35    2.73 
  -5  -2  -1   34.53    2.86 
   2  -5  -1   39.50    2.92 
   2  -5  -1   37.75    2.83 
   2  -5  -1   40.81    2.74 
   2  -5  -1   39.92    2.79 
  -5  -2  -1   39.05    2.56 
  -5  -2  -1   37.82    2.89 
  -2   5  -1   40.92    2.88 
  -2   5  -1   38.51    2.81 
  -2   5  -1   38.80    3.20 
   5   2  -1   41.19    2.72 
   2  -5  -1   37.11    2.77 
   5   2  -1   35.79    2.84 
  -2   5  -1   37.24    3.13 
   5   2  -1   39.74    2.71 
   2  -5  -1   37.88    2.98 
  -2   5  -1   40.06    3.10 
   5   2  -1   36.78    2.53 
   2  -5   1   44.48    2.71 
   5   2   1   39.22    2.37 
  -2   5   1   47.40    3.03 
  -2   5   1   39.37    2.77 
  -5  -2   1   39.76    2.57 
  -5  -2   1   37.73    2.77 
  -5  -2   1   37.52    3.00 
   2  -5   1   36.39    2.87 
   2  -5   1   42.13    2.74 
  -5  -2   1   37.10    3.00 
  -5  -2   1   39.05    2.68 
   2  -5   1   40.39    2.78 
   5   2   1   34.79    2.59 
   2  -5   1   37.80    2.75 
   5   2   1   38.38    2.58 
   5   2   1   41.60    2.76 
   2  -5   1   38.55    2.65 
   5   2   1   40.34    2.56 
  -5  -2   1   39.76    2.57 
   5   2   1   36.72    2.37 
   2  -5   1   40.13    3.18 
   2  -5   1   42.36    3.00 
  -2   5   1   40.44    2.86 
   2  -5   1   41.18    2.92 
  -2   5   1   36.61    3.04 
  -2   5   1   31.31    2.82 
  -5  -2   1   41.63    2.57 
   5   2   1   40.94    2.56 
  -5  -2   1   42.55    2.71 
   1  -5  -1   87.75    5.61 
   5   1  -1   75.40    5.17 
  -5  -1  -1   83.02    6.00 
   1  -5  -1   79.76    5.79 
   1  -5  -1   90.80    6.02 
   1  -5  -1   84.11    5.49 
   1  -5  -1   85.94    5.66 
   5   1  -1   76.38    5.17 
   1  -5  -1   83.03    5.50 
   5   1  -1   86.72    5.53 
  -1   5  -1   84.38    6.34 
   5   1  -1   80.90    5.51 
   1  -5  -1   81.76    5.76 
   5   1  -1   86.00    5.99 
   1  -5  -1   78.36    6.30 
  -1   5  -1   86.61    5.69 
   5   1  -1   85.17    5.84 
  -5  -1  -1   85.64    6.00 
  -1   5  -1   81.44    5.66 
   1  -5  -1   85.89    6.37 
   5   1  -1   89.20    5.54 
   5   1  -1   99.08    5.90 
   5   1  -1   86.65    5.99 
  -1   5   1   85.51    6.31 
   1  -5   1   90.34    5.75 
  -5  -1   1   84.81    5.31 
   1  -5   1   91.16    6.34 
   1  -5   1   91.78    5.78 
   1  -5   1   89.15    5.50 
  -1   5   1   83.06    6.07 
   1  -5   1   74.44    5.55 
   5   1   1   87.11    5.39 
  -5  -1   1   85.32    5.46 
  -5  -1   1   76.84    5.74 
  -5  -1   1   76.09    5.30 
  -5  -1   1   76.05    5.30 
  -5  -1   1   80.03    6.13 
   5   1   1   81.87    5.37 
  -5  -1   1   94.09    5.54 
  -1   5   1   78.76    5.66 
   5   1   1   87.54    5.69 
  -5  -1   1   73.16    6.12 
  -1   5   1   89.93    5.77 
  -1   5   1   90.71    6.36 
   1  -5   1   83.41    5.98 
   1  -5   1   80.83    5.47 
   5   1   1   88.31    5.69 
   1  -5   1   79.48    6.31 
   1  -5   1   79.01    5.35 
  -1   5   1   91.56    5.74 
   0   5  -1  460.31   28.84 
   0  -5  -1  429.28   32.14 
   0  -5  -1  457.64   30.47 
   5   0  -1  449.61   27.05 
   0  -5  -1  500.76   27.78 
  -5   0  -1  403.08   31.85 
   0  -5  -1  481.17   29.15 
   0  -5  -1  489.37   29.11 
   0   5  -1  432.08   30.53 
   0   5  -1  469.78   28.98 
   0  -5  -1  493.45   28.12 
   0   5  -1  501.03   29.07 
   5   0  -1  408.34   30.30 
   0   5  -1  410.19   32.15 
   5   0  -1  422.52   28.60 
  -5   0  -1  437.86   31.88 
   5   0  -1  471.04   31.88 
   5   0  -1  483.42   28.64 
   0  -5  -1  493.15   28.16 
   5   0  -1  495.11   31.87 
   0   5  -1  452.40   28.74 
   0  -5  -1  437.65   28.42 
   5   0  -1  413.60   28.85 
   5   0  -1  453.63   30.33 
  -5   0   1  411.11   31.98 
   0  -5   1  479.42   29.23 
   0   5   1  400.65   30.52 
  -5   0   1  487.95   28.85 
   0  -5   1  427.61   28.42 
   0  -5   1  482.32   32.20 
   0   5   1  487.42   32.16 
  -5   0   1  439.09   27.95 
   0   5   1  454.69   29.01 
   5   0   1  457.78   28.52 
   0   5   1  456.18   27.26 
   0  -5   1  463.07   32.15 
   5   0   1  482.32   30.23 
  -5   0   1  468.58   28.55 
  -5   0   1  466.85   30.27 
  -5   0   1  438.91   27.99 
   0   5   1  475.50   28.74 
   0   5   1  415.84   28.99 
   0  -5   1  443.28   28.64 
  -5   0   1  449.26   27.92 
   0   5   1  468.60   32.20 
   0  -5   1  411.57   30.44 
   5   0   1  486.17   30.22 
  -5   0   1  449.68   27.97 
   0  -5   1  423.79   29.05 
   5   0   1  452.14   28.51 
   0  -5   1  419.39   27.71 
  -5   0   1  445.37   31.97 
   1   5  -1   83.02    5.81 
  -5   1  -1   85.27    6.19 
  -1  -5  -1   77.85    5.60 
   5  -1  -1   91.31    5.70 
  -1  -5  -1   89.67    5.72 
   1   5  -1   77.36    6.16 
   5  -1  -1   93.18    6.03 
   5  -1  -1   88.52    5.97 
   1   5  -1   97.50    6.47 
  -1  -5  -1   89.37    6.48 
   5  -1  -1   86.63    6.20 
   1   5  -1   86.81    6.50 
  -1  -5  -1   86.30    6.08 
   5  -1  -1   80.39    5.32 
  -1  -5  -1   86.12    5.74 
  -5   1  -1   90.89    5.56 
   5  -1  -1   88.93    6.18 
   5  -1  -1   87.08    5.64 
  -1  -5  -1   94.11    6.47 
   5  -1  -1   84.42    5.33 
   1   5  -1   77.32    5.74 
  -1  -5  -1   87.99    5.60 
   1   5  -1   91.78    5.90 
  -5   1  -1   87.59    6.19 
  -1  -5  -1   86.93    5.87 
  -1  -5  -1   91.14    5.65 
   5  -1  -1   99.54    5.72 
  -5   1  -1   84.11    5.54 
  -1  -5  -1   86.95    5.62 
   5  -1  -1   79.87    5.64 
   1   5   1   85.25    5.51 
  -1  -5   1   82.32    6.44 
  -1  -5   1   89.84    6.50 
  -1  -5   1   84.03    5.62 
  -5   1   1   86.79    5.45 
   1   5   1   89.12    6.42 
   5  -1   1   91.94    5.59 
   5  -1   1   84.44    5.56 
  -5   1   1   84.05    5.48 
  -1  -5   1   82.66    5.59 
   1   5   1   76.49    5.77 
   5  -1   1   89.02    5.86 
   1   5   1   82.97    5.78 
   1   5   1   79.57    5.80 
  -5   1   1   90.99    5.64 
  -5   1   1   84.01    5.65 
   1   5   1   90.13    5.76 
   5  -1   1   85.43    5.20 
  -1  -5   1   81.86    5.70 
  -1  -5   1   84.03    5.61 
  -5   1   1   86.86    5.95 
   1   5   1   87.81    6.45 
  -1  -5   1   86.04    5.66 
   5  -1   1   84.36    5.55 
  -1  -5   1   83.73    6.11 
   1   5   1   89.06    6.21 
  -5   1   1   79.73    6.30 
  -5   1   1   86.83    5.44 
  -5   1   1   84.01    6.27 
   5  -1   1   78.76    5.19 
  -1  -5   1   80.61    5.82 
  -5   1   1   83.98    5.49 
   5  -1   1   91.79    5.57 
   2   5  -1   41.03    2.77 
   5  -2  -1   43.24    2.93 
   5  -2  -1   39.39    2.77 
  -5   2  -1   36.97    2.61 
   5  -2  -1   36.56    2.57 
   5  -2  -1   41.59    2.74 
  -2  -5  -1   33.35    2.67 
   5  -2  -1   36.34    2.85 
  -2  -5  -1   37.91    2.67 
   2   5  -1   33.36    2.99 
   5  -2  -1   42.21    2.98 
   5  -2  -1   35.40    2.54 
  -5   2  -1   34.64    2.61 
  -2  -5  -1   42.96    2.94 
  -2  -5  -1   38.34    2.75 
   2   5  -1   37.13    2.80 
  -2  -5  -1   39.53    2.72 
  -2  -5  -1   42.12    2.88 
  -5   2  -1   39.94    2.52 
  -5   2  -1   37.61    2.62 
   2   5  -1   42.30    3.20 
   2   5  -1   33.99    2.70 
   5  -2  -1   36.46    2.72 
  -2  -5  -1   39.23    2.81 
  -5   2  -1   43.21    2.75 
   5  -2  -1   38.91    2.72 
  -5   2  -1   39.93    2.51 
  -2  -5  -1   38.97    2.74 
   2   5  -1   42.63    3.12 
  -5   2  -1   35.53    2.91 
   5  -2  -1   35.97    2.70 
  -5   2  -1   36.26    2.94 
  -2  -5  -1   34.84    3.06 
   2   5  -1   36.38    2.77 
  -2  -5  -1   35.53    3.11 
  -5   2  -1   40.73    2.53 
   2   5  -1   36.92    2.72 
  -2  -5  -1   37.93    2.67 
  -5   2  -1   40.72    2.54 
   5  -2   1   35.95    2.47 
  -2  -5   1   36.04    2.69 
   2   5   1   35.99    2.67 
  -5   2   1   38.96    2.72 
  -5   2   1   42.72    2.59 
   2   5   1   37.28    2.85 
   2   5   1   37.48    3.11 
   5  -2   1   42.41    2.83 
  -5   2   1   36.75    3.03 
  -2  -5   1   38.28    2.76 
   5  -2   1   39.82    2.78 
  -2  -5   1   36.04    2.69 
  -2  -5   1   38.61    2.76 
   5  -2   1   36.58    2.65 
   2   5   1   37.10    3.01 
  -5   2   1   42.65    2.59 
   5  -2   1   42.45    2.67 
  -2  -5   1   37.47    2.87 
   2   5   1   39.00    2.74 
  -2  -5   1   38.74    3.19 
  -2  -5   1   39.97    2.75 
   2   5   1   42.41    2.84 
  -5   2   1   39.50    2.88 
  -5   2   1   36.31    2.63 
   2   5   1   35.14    2.66 
  -5   2   1   37.83    3.01 
   5  -2   1   38.45    2.72 
  -2  -5   1   37.85    2.95 
  -5   2   1   39.13    3.04 
  -5   2   1   39.54    2.70 
  -5   2   1   36.33    2.62 
   5  -2   1   38.02    2.48 
   2   5   1   35.42    2.68 
   2   5   1   40.41    3.08 
  -3  -5  -1   12.85    1.09 
   3   5  -1   12.46    1.09 
   5  -3  -1   12.12    1.06 
  -3  -5  -1   12.85    1.09 
   5  -3  -1   11.31    1.08 
   3   5  -1   12.19    1.19 
   3   5  -1   12.19    1.25 
   3   5  -1   14.30    1.36 
  -3  -5  -1   13.08    1.33 
   3   5  -1   15.45    1.27 
   5  -3  -1   13.32    1.27 
   3   5  -1   13.11    1.19 
   5  -3  -1   11.53    1.15 
   5  -3  -1   13.97    1.25 
  -3  -5  -1   13.28    1.20 
  -5   3  -1   13.77    1.13 
   5  -3  -1   11.58    1.17 
  -5   3  -1   11.36    1.00 
   3   5  -1   13.09    1.25 
  -5   3  -1   12.52    1.06 
   3   5  -1   11.20    1.25 
   5  -3  -1   12.92    1.21 
   5  -3  -1   13.22    1.20 
  -5   3  -1   11.38    1.00 
   3   5  -1   12.31    1.18 
   5  -3  -1   12.58    1.13 
  -5   3  -1   10.20    1.04 
  -5   3  -1   10.50    1.10 
  -3  -5  -1   13.70    1.23 
  -3  -5  -1   12.51    1.16 
   3   5  -1   12.83    1.36 
  -3  -5  -1   10.80    1.23 
  -5   3  -1   15.30    1.26 
   5  -3  -1   10.70    1.09 
  -5   3  -1   11.56    1.18 
   3   5  -1   11.83    1.12 
  -3  -5  -1   12.93    1.26 
  -3  -5  -1   13.06    1.13 
   5  -3  -1   11.13    0.93 
  -5   3  -1   12.20    1.04 
  -3  -5   1   11.63    1.11 
  -3  -5   1   10.70    1.13 
   3   5   1   11.14    1.12 
   5  -3   1   15.37    1.13 
  -5   3   1   13.18    1.06 
   3   5   1   11.49    1.14 
  -3  -5   1   13.84    1.25 
   3   5   1   12.98    1.27 
  -5   3   1   11.71    1.25 
   3   5   1   10.90    1.13 
  -5   3   1   13.64    1.20 
   3   5   1   11.26    1.05 
   3   5   1   11.26    1.11 
  -5   3   1   13.17    1.05 
   5  -3   1   11.70    1.02 
  -3  -5   1   11.64    1.13 
  -3  -5   1   13.46    1.25 
   5  -3   1   13.17    1.15 
  -3  -5   1   11.78    1.34 
   5  -3   1   12.58    1.10 
  -5   3   1   12.21    1.07 
  -3  -5   1   11.52    1.19 
   3   5   1   12.62    1.13 
   5  -3   1   12.69    1.14 
   3   5   1   11.60    1.23 
  -5   3   1   12.17    1.27 
  -3  -5   1   11.63    1.11 
  -5   3   1   12.79    1.12 
  -5   3   1   12.79    1.12 
   3   5   1   11.73    1.21 
   5  -3   1   12.30    1.06 
   3   5   1   12.05    1.05 
  -3  -5   1   12.09    1.20 
  -5   3   1   11.30    1.17 
   3   5   1   12.72    1.17 
   3   5   1   10.63    1.22 
   5  -3   1   10.92    1.06 
  -5   3   1   14.59    1.16 
   5  -3   1   11.61    1.25 
  -4  -5  -1   17.46    1.52 
  -5   4  -1   18.32    1.58 
   4   5  -1   18.01    1.38 
  -4  -5  -1   17.39    1.62 
  -4  -5  -1   15.27    1.54 
  -4  -5  -1   19.09    1.46 
   4   5  -1   16.51    1.50 
  -4  -5  -1   16.08    1.36 
   5  -4  -1   19.22    1.44 
  -5   4  -1   17.95    1.45 
   4   5  -1   17.16    1.51 
   5  -4  -1   16.83    1.43 
   5  -4  -1   15.47    1.55 
  -5   4  -1   16.33    1.61 
   4   5  -1   16.70    1.47 
  -4  -5  -1   16.45    1.48 
   5  -4  -1   15.15    1.38 
   4   5  -1   17.63    1.69 
   4   5  -1   15.02    1.43 
  -5   4  -1   18.46    1.39 
  -5   4  -1   18.67    1.54 
  -5   4  -1   17.83    1.65 
   4   5  -1   16.91    1.64 
   5  -4  -1   19.39    1.41 
   4   5  -1   18.78    1.66 
  -4  -5  -1   19.07    1.68 
   5  -4  -1   19.27    1.49 
   5  -4  -1   16.53    1.54 
  -4  -5  -1   17.45    1.45 
   5  -4  -1   16.88    1.56 
   5  -4  -1   17.88    1.36 
  -5   4  -1   18.45    1.39 
  -4  -5  -1   16.07    1.36 
   4   5  -1   18.50    1.54 
   4   5  -1   20.09    1.41 
   5  -4  -1   17.73    1.60 
   5  -4  -1   15.93    1.47 
  -5   4  -1   17.29    1.45 
  -4  -5   1   16.01    1.45 
  -5   4   1   18.25    1.42 
   4   5   1   15.03    1.39 
   4   5   1   18.26    1.56 
  -4  -5   1   15.68    1.50 
  -5   4   1   19.58    1.75 
   5  -4   1   17.54    1.35 
  -4  -5   1   18.29    1.69 
  -4  -5   1   15.06    1.67 
   4   5   1   15.20    1.39 
   5  -4   1   18.38    1.47 
   4   5   1   16.62    1.39 
  -5   4   1   16.59    1.60 
   5  -4   1   20.36    1.43 
   4   5   1   16.11    1.58 
  -5   4   1   15.99    1.47 
  -5   4   1   20.02    1.54 
   5  -4   1   18.78    1.61 
   4   5   1   19.04    1.47 
   5  -4   1   16.51    1.48 
  -4  -5   1   15.55    1.41 
  -5   4   1   18.49    1.69 
  -5   4   1   15.63    1.51 
   5  -4   1   17.69    1.35 
  -4  -5   1   16.63    1.49 
  -4  -5   1   14.11    1.50 
   4   5   1   18.52    1.36 
   5  -4   1   17.29    1.41 
   4   5   1   18.44    1.43 
  -5   4   1   18.23    1.42 
   4   5   1   15.62    1.44 
  -5   4   1   15.85    1.43 
  -4  -5   1   15.55    1.41 
   5  -4   1   18.23    1.45 
   5  -4   1   16.53    1.52 
   5  -4   1   15.63    1.61 
  -4  -5   1   16.58    1.50 
  -5  -5  -1    0.52    0.37 
  -5   5  -1    0.00    0.29 
  -5   5  -1    0.00    0.29 
   5   5  -1   -0.27    0.44 
  -5  -5  -1    0.36    0.46 
   5  -5  -1    0.40    0.36 
  -5  -5  -1    0.43    0.30 
  -5   5  -1   -0.31    0.28 
   5  -5  -1    0.43    0.39 
   5  -5  -1   -0.24    0.27 
  -5  -5  -1    0.32    0.39 
   5   5  -1   -0.78    0.28 
  -5   5  -1    0.43    0.42 
  -5  -5  -1   -0.15    0.32 
   5  -5  -1    0.02    0.36 
   5  -5  -1    0.00    0.40 
   5   5  -1    0.38    0.38 
   5   5  -1    0.31    0.39 
  -5  -5  -1    0.43    0.30 
   5   5  -1    0.23    0.38 
  -5   5  -1    0.26    0.37 
  -5   5  -1    0.34    0.42 
   5   5  -1   -0.38    0.30 
   5  -5  -1    1.29    0.60 
   5   5  -1    0.50    0.41 
   5  -5  -1   -0.41    0.30 
   5  -5  -1    0.35    0.35 
   5  -5  -1    0.51    0.37 
  -5  -5  -1   -0.43    0.27 
  -5   5  -1   -0.06    0.30 
  -5   5  -1   -0.15    0.34 
   5  -5  -1    2.31    0.60 
  -5  -5   1    0.52    0.40 
   5  -5   1   -0.01    0.35 
  -5  -5   1   -0.03    0.40 
   5   5   1    0.49    0.36 
  -5  -5   1    3.27    0.62 
   5  -5   1   -0.01    0.33 
   5  -5   1    1.49    0.53 
  -5   5   1    0.02    0.36 
  -5  -5   1   -0.05    0.28 
  -5   5   1    0.35    0.46 
   5  -5   1    0.13    0.38 
  -5  -5   1   -0.05    0.28 
  -5   5   1   -0.01    0.42 
   5  -5   1    0.14    0.43 
   5  -5   1    0.01    0.41 
  -5   5   1   -0.04    0.35 
   5   5   1    0.50    0.35 
  -5   5   1    0.13    0.37 
   5   5   1   -0.18    0.30 
   5   5   1    0.03    0.30 
   5   5   1   -0.08    0.30 
  -5   5   1    0.33    0.46 
  -5  -5   1    0.30    0.40 
  -5   5   1    0.27    0.35 
   5  -5   1    0.21    0.59 
   5  -5   1    0.08    0.34 
  -5  -5   1    0.14    0.37 
   5   5   1   -0.23    0.35 
  -5  -5   1    0.02    0.35 
   5   5   1    0.49    0.33 
   5   5   1    0.08    0.32 
   5  -5   1   -0.27    0.33 
   5  -5   1    1.62    0.53 
  -5   6  -1    4.19    0.73 
   5  -6  -1    3.10    0.77 
   5  -6  -1    3.50    0.74 
   6   5  -1    3.69    0.76 
   6   5  -1    3.60    0.65 
   5  -6  -1    1.53    0.60 
  -6  -5  -1    3.10    0.65 
   6   5  -1    3.76    0.62 
   6   5  -1    4.46    0.64 
   5  -6  -1    2.02    0.60 
   5  -6  -1    2.95    0.72 
   6   5  -1    2.29    0.67 
  -6  -5  -1    3.27    0.52 
  -6  -5  -1    2.42    0.53 
   5  -6  -1    1.37    0.57 
  -6  -5  -1    3.57    0.68 
  -6  -5  -1    3.28    0.52 
   6   5  -1    3.35    0.63 
  -5   6  -1    2.68    0.75 
  -5   6  -1    3.31    0.81 
   6   5  -1    2.24    0.61 
  -6  -5  -1    3.86    0.71 
   6   5  -1    3.56    0.66 
  -5   6  -1    2.16    0.61 
   5  -6  -1    2.53    0.62 
  -6  -5  -1    3.02    0.59 
   5  -6  -1    3.22    0.60 
  -6  -5   1    3.99    0.64 
   6   5   1    3.85    0.58 
  -6  -5   1    2.86    0.61 
   5  -6   1    3.25    0.70 
  -5   6   1    2.07    0.70 
  -5   6   1    3.65    0.76 
   5  -6   1    5.04    0.89 
   6   5   1    1.72    0.54 
   5  -6   1    1.62    0.60 
  -6  -5   1    3.57    0.76 
  -5   6   1    3.39    0.85 
  -6  -5   1    4.15    0.63 
  -6  -5   1    3.18    0.66 
   6   5   1    4.23    0.70 
   6   5   1    2.79    0.48 
   5  -6   1    3.08    0.61 
   6   5   1    2.54    0.50 
  -5   6   1    2.77    0.69 
   6   5   1    4.21    0.64 
   5  -6   1    3.56    0.72 
   5  -6   1    2.33    0.59 
   6   5   1    3.40    0.56 
   5  -6   1    3.02    0.73 
  -6  -5   1    3.99    0.79 
   6   5   1    2.50    0.46 
   5  -6   1    3.20    0.51 
  -6  -5   1    4.15    0.63 
  -5   6   1    1.84    0.69 
   5  -6   1    2.27    0.66 
   4  -6  -1   43.95    3.19 
   4  -6  -1   46.74    3.18 
  -6  -4  -1   41.02    2.97 
  -4   6  -1   44.02    3.76 
   4  -6  -1   46.46    3.16 
   4  -6  -1   44.47    3.02 
   6   4  -1   43.28    3.26 
  -4   6  -1   45.90    3.73 
   4  -6  -1   40.93    3.16 
   4  -6  -1   44.39    3.42 
  -6  -4  -1   37.46    3.45 
   4  -6  -1   43.85    3.37 
  -4   6  -1   47.55    3.61 
  -6  -4  -1   43.25    3.11 
  -4   6  -1   49.73    3.27 
   4  -6  -1   42.99    3.50 
  -6  -4  -1   41.05    2.97 
   6   4  -1   43.09    3.02 
   4  -6  -1   51.07    3.84 
   6   4  -1   46.14    3.04 
  -6  -4  -1   49.88    3.04 
  -4   6  -1   41.68    3.36 
   6   4  -1   42.28    3.05 
   4  -6  -1   45.21    3.19 
   6   4  -1   42.26    3.00 
   6   4  -1   44.53    3.20 
   6   4  -1   41.74    2.98 
   6   4  -1   46.06    3.46 
  -4   6  -1   44.03    3.33 
  -6  -4  -1   46.80    3.15 
  -4   6  -1   46.59    3.34 
   4  -6  -1   44.82    3.15 
  -6  -4  -1   40.89    3.45 
   4  -6  -1   45.10    3.75 
  -6  -4   1   49.20    3.67 
  -4   6   1   46.84    3.31 
   4  -6   1   47.30    3.16 
   6   4   1   43.19    2.87 
  -6  -4   1   43.72    3.59 
   4  -6   1   43.15    3.47 
   6   4   1   41.84    3.15 
   6   4   1   45.01    2.89 
   4  -6   1   39.83    3.21 
   4  -6   1   51.09    3.22 
  -6  -4   1   47.26    3.23 
   4  -6   1   43.23    3.10 
  -4   6   1   45.19    3.79 
   4  -6   1   42.14    3.39 
   6   4   1   46.37    2.90 
   4  -6   1   42.14    3.12 
  -4   6   1   46.80    3.66 
   4  -6   1   43.19    3.36 
  -4   6   1   49.64    3.46 
   6   4   1   43.88    3.08 
   6   4   1   45.27    3.32 
   6   4   1   49.27    3.03 
  -6  -4   1   51.28    3.13 
   4  -6   1   43.39    3.09 
  -6  -4   1   46.63    3.11 
  -6  -4   1   51.28    3.13 
  -4   6   1   42.18    3.33 
   6   4   1   43.25    3.11 
  -4   6   1   44.08    3.34 
   3  -6  -1    2.27    0.61 
  -6  -3  -1    2.55    0.48 
   3  -6  -1    1.83    0.57 
   6   3  -1    2.62    0.46 
  -3   6  -1    2.05    0.63 
  -3   6  -1    1.61    0.65 
   6   3  -1    1.61    0.44 
   3  -6  -1    3.34    0.69 
   3  -6  -1    2.03    0.56 
   6   3  -1    3.23    0.52 
  -6  -3  -1    2.57    0.47 
  -3   6  -1    2.53    0.73 
  -3   6  -1    1.52    0.58 
   3  -6  -1    2.04    0.63 
   6   3  -1    1.47    0.40 
   6   3  -1    2.33    0.52 
   3  -6  -1    3.35    0.49 
   3  -6  -1    3.30    0.79 
  -3   6  -1    3.53    0.66 
  -3   6  -1    4.06    0.80 
   3  -6  -1    2.91    0.66 
   6   3  -1    2.92    0.58 
   3  -6  -1    2.36    0.59 
   3  -6  -1    2.38    0.66 
  -6  -3  -1    2.44    0.33 
   6   3  -1    2.10    0.53 
   3  -6  -1    2.52    0.63 
   6   3  -1    2.35    0.47 
  -6  -3  -1    2.44    0.33 
  -6  -3  -1    1.62    0.33 
   6   3  -1    4.07    0.59 
   3  -6  -1    0.46    0.51 
   3  -6  -1    2.34    0.51 
  -6  -3  -1    3.01    0.57 
   3  -6   1    1.87    0.44 
   3  -6   1    4.61    0.64 
  -6  -3   1    3.32    0.57 
  -3   6   1    2.16    0.64 
  -6  -3   1    2.91    0.45 
   3  -6   1    1.63    0.57 
   6   3   1    1.90    0.44 
   6   3   1    2.93    0.39 
  -6  -3   1    2.14    0.54 
   3  -6   1    2.33    0.64 
  -3   6   1    1.70    0.58 
  -3   6   1    3.32    0.77 
   3  -6   1    2.20    0.65 
   6   3   1    2.67    0.33 
   6   3   1    2.41    0.33 
  -3   6   1    2.37    0.68 
   3  -6   1    2.56    0.68 
  -3   6   1    2.54    0.68 
  -3   6   1    3.33    0.76 
   3  -6   1    2.29    0.61 
  -6  -3   1    2.91    0.45 
   3  -6   1    2.80    0.64 
  -6  -3   1    2.44    0.47 
  -3   6   1    2.54    0.71 
   6   3   1    2.01    0.42 
   3  -6   1    1.89    0.61 
   6   3   1    2.93    0.44 
  -6  -3   1    2.20    0.57 
   3  -6   1    1.77    0.61 
   3  -6   1    2.51    0.57 
   2  -6  -1  217.91   14.35 
   2  -6  -1  218.32   13.33 
   2  -6  -1  215.81   13.81 
  -6  -2  -1  210.55   15.20 
   2  -6  -1  212.05   13.23 
   6   2  -1  218.83   13.82 
  -2   6  -1  226.76   14.04 
   6   2  -1  230.02   14.57 
   6   2  -1  203.00   12.93 
   2  -6  -1  220.23   14.12 
  -2   6  -1  194.61   13.91 
  -2   6  -1  232.50   15.63 
  -6  -2  -1  210.03   15.20 
   2  -6  -1  196.74   14.69 
   2  -6  -1  227.96   13.66 
   2  -6  -1  197.05   15.54 
   6   2  -1  226.04   13.79 
   6   2  -1  221.81   12.95 
  -2   6  -1  220.55   14.88 
   2  -6  -1  195.07   13.40 
  -2   6  -1  199.86   15.51 
  -2   6  -1  234.24   13.44 
   2  -6  -1  216.21   14.07 
  -2   6  -1  204.23   13.99 
   6   2  -1  212.21   13.72 
   2  -6  -1  228.47   15.56 
   2  -6  -1  228.31   12.98 
   2  -6   1  204.18   13.41 
   2  -6   1  230.24   13.22 
  -2   6   1  222.54   14.86 
   2  -6   1  189.15   14.07 
   2  -6   1  215.12   14.69 
  -2   6   1  213.55   13.43 
  -2   6   1  225.16   13.33 
   2  -6   1  205.44   13.59 
   2  -6   1  218.08   13.80 
  -6  -2   1  214.38   15.34 
   2  -6   1  232.07   13.26 
   6   2   1  199.86   13.57 
  -6  -2   1  204.65   13.37 
   2  -6   1  194.98   12.91 
  -2   6   1  215.68   13.95 
  -6  -2   1  214.32   15.33 
  -2   6   1  202.57   13.99 
   6   2   1  233.05   14.42 
  -6  -2   1  224.72   13.70 
  -6  -2   1  204.95   13.35 
   2  -6   1  206.30   15.56 
  -6  -2   1  230.39   13.38 
  -2   6   1  216.91   15.59 
   2  -6   1  213.32   14.07 
   2  -6   1  227.63   14.31 
   2  -6   1  225.00   15.55 
   6   2   1  203.33   13.60 
   2  -6   1  193.74   13.26 
   1  -6  -1    3.22    0.74 
   1  -6  -1    3.11    0.70 
   1  -6  -1    2.27    0.63 
  -1   6  -1    3.00    0.69 
   1  -6  -1    4.69    0.64 
  -1   6  -1    3.34    0.76 
  -1   6  -1    2.04    0.57 
  -1   6  -1    2.44    0.63 
   1  -6  -1    2.42    0.56 
  -6  -1  -1    3.01    0.39 
  -1   6  -1    2.10    0.68 
   6   1  -1    2.47    0.43 
   6   1  -1    3.51    0.52 
   1  -6  -1    4.07    0.76 
   1  -6  -1    3.37    0.62 
   6   1  -1    3.37    0.47 
   6   1  -1    2.90    0.52 
   6   1  -1    3.58    0.53 
   1  -6  -1    2.20    0.54 
   6   1  -1    2.70    0.43 
  -1   6  -1    2.32    0.69 
  -6  -1  -1    3.26    0.40 
  -1   6  -1    3.97    0.69 
  -1   6  -1    3.01    0.69 
   1  -6  -1    5.78    0.82 
   1  -6  -1    3.71    0.65 
   1  -6   1    3.04    0.68 
   1  -6   1    3.46    0.70 
   6   1   1    2.46    0.38 
   6   1   1    3.66    0.36 
  -1   6   1    4.48    0.82 
   1  -6   1    3.61    0.69 
   6   1   1    3.01    0.36 
  -1   6   1    3.77    0.79 
   1  -6   1    3.03    0.70 
  -1   6   1    3.22    0.69 
  -6  -1   1    4.36    0.53 
   1  -6   1    3.22    0.75 
   1  -6   1    1.34    0.51 
  -1   6   1    3.09    0.65 
  -6  -1   1    2.63    0.39 
  -1   6   1    2.35    0.65 
  -6  -1   1    2.40    0.51 
   1  -6   1    3.25    0.66 
   1  -6   1    2.40    0.56 
  -1   6   1    3.41    0.70 
  -6  -1   1    2.64    0.39 
  -6  -1   1    3.32    0.54 
  -6  -1   1    2.52    0.38 
   1  -6   1    3.33    0.58 
  -1   6   1    6.36    0.84 
  -1   6   1    2.38    0.69 
  -1   6   1    3.03    0.63 
   6   1   1    2.91    0.34 
  -6  -1   1    3.80    0.47 
   0   6  -1    2.84    0.66 
   0   6  -1    2.43    0.68 
   0   6  -1    2.62    0.67 
   0  -6  -1    1.59    0.56 
   0  -6  -1    3.89    0.60 
  -6   0  -1    3.03    0.39 
   0   6  -1    3.28    0.61 
   0   6  -1    2.93    0.69 
   0   6  -1    2.55    0.73 
   0   6  -1    1.93    0.60 
   6   0  -1    2.99    0.43 
   0  -6  -1    2.52    0.57 
   0  -6  -1    3.97    0.69 
   6   0  -1    2.68    0.45 
   6   0  -1    4.94    0.58 
   0  -6  -1    1.71    0.61 
   0   6  -1    3.38    0.70 
   0  -6  -1    3.00    0.56 
  -6   0  -1    2.85    0.37 
   6   0  -1    3.07    0.52 
   6   0  -1    2.73    0.48 
   0  -6  -1    3.85    0.64 
   0   6  -1    3.01    0.63 
   6   0  -1    2.34    0.44 
   0  -6  -1    2.53    0.66 
   0  -6   1    3.23    0.75 
   0   6   1    3.26    0.74 
   0   6   1    3.17    0.66 
   6   0   1    3.29    0.35 
   6   0   1    2.62    0.34 
   0   6   1    2.80    0.71 
   0  -6   1    3.44    0.70 
   0   6   1    2.07    0.58 
   0  -6   1    2.66    0.66 
   0  -6   1    2.63    0.59 
   0  -6   1    2.43    0.62 
   0  -6   1    2.47    0.57 
  -6   0   1    3.12    0.52 
  -6   0   1    2.24    0.38 
  -6   0   1    3.04    0.39 
  -6   0   1    3.04    0.39 
   0   6   1    2.75    0.72 
   0   6   1    1.67    0.60 
   6   0   1    2.03    0.35 
   6   0   1    3.05    0.35 
   0   6   1    2.43    0.58 
  -6   0   1    2.93    0.51 
   0   6   1    2.78    0.67 
   0   6   1    2.98    0.65 
   0  -6   1    3.07    0.60 
   0  -6   1    2.74    0.66 
   0  -6   1    1.90    0.57 
  -6   0   1    3.37    0.44 
  -6   0   1    2.24    0.38 
   0   6   1    2.79    0.65 
  -6   0   1    2.75    0.48 
   6  -1  -1    2.61    0.51 
  -6   1  -1    3.84    0.47 
  -6   1  -1    2.95    0.43 
   1   6  -1    3.64    0.62 
   1   6  -1    3.53    0.78 
   1   6  -1    3.23    0.69 
  -1  -6  -1    2.82    0.56 
  -1  -6  -1    2.41    0.66 
   6  -1  -1    3.28    0.48 
  -1  -6  -1    3.04    0.64 
   6  -1  -1    4.56    0.60 
  -1  -6  -1    3.36    0.77 
  -1  -6  -1    2.88    0.59 
   6  -1  -1    2.51    0.47 
   1   6  -1    3.73    0.74 
   1   6  -1    4.67    0.82 
   1   6  -1    3.26    0.70 
   1   6  -1    2.44    0.62 
   1   6  -1    4.38    0.81 
   1   6  -1    3.63    0.71 
  -1  -6  -1    2.43    0.54 
   1   6  -1    2.58    0.64 
  -1  -6  -1    3.13    0.65 
   6  -1  -1    3.65    0.57 
  -1  -6  -1    3.07    0.71 
   1   6  -1    3.09    0.66 
  -1  -6  -1    3.64    0.71 
  -1  -6  -1    2.42    0.54 
   6  -1  -1    2.74    0.48 
  -6   1   1    2.52    0.39 
   6  -1   1    4.04    0.47 
   6  -1   1    3.15    0.34 
  -6   1   1    3.73    0.59 
  -1  -6   1    4.30    0.80 
  -1  -6   1    2.77    0.64 
   1   6   1    3.12    0.66 
   1   6   1    4.08    0.78 
  -6   1   1    2.52    0.39 
  -1  -6   1    3.87    0.64 
  -6   1   1    2.99    0.46 
   6  -1   1    2.60    0.69 
  -6   1   1    3.40    0.47 
   1   6   1    3.11    0.58 
   1   6   1    2.79    0.63 
  -1  -6   1    2.96    0.68 
  -1  -6   1    3.47    0.71 
  -1  -6   1    6.45    0.76 
  -1  -6   1    3.29    0.66 
   1   6   1    3.75    0.68 
  -1  -6   1    2.02    0.64 
   6  -1   1    2.80    0.35 
   6  -1   1    4.35    0.45 
   1   6   1    2.75    0.63 
   1   6   1    3.05    0.65 
   1   6   1    3.10    0.67 
   6  -1   1    2.71    0.42 
   1   6   1    2.40    0.63 
  -6   1   1    2.68    0.53 
  -6   1   1    3.55    0.54 
   1   6   1    2.78    0.71 
  -6   1   1    2.99    0.46 
  -1  -6   1    2.75    0.65 
   1   6   1    3.25    0.75 
  -2  -6  -1  211.99   13.93 
   2   6  -1  204.44   13.79 
   6  -2  -1  207.51   13.71 
   6  -2  -1  202.93   13.17 
   6  -2  -1  215.11   13.84 
  -2  -6  -1  225.83   15.54 
  -2  -6  -1  203.45   13.47 
   6  -2  -1  215.91   13.77 
   2   6  -1  194.66   14.74 
  -2  -6  -1  206.16   13.40 
  -2  -6  -1  213.07   13.77 
   2   6  -1  215.00   15.46 
  -6   2  -1  226.84   15.27 
   2   6  -1  229.41   14.01 
  -2  -6  -1  213.63   14.01 
  -6   2  -1  205.16   15.21 
  -6   2  -1  217.26   13.32 
   6  -2  -1  185.97   14.48 
   6  -2  -1  227.95   13.11 
   2   6  -1  215.76   12.86 
  -2  -6  -1  200.29   14.60 
   6  -2  -1  205.70   12.94 
   2   6  -1  213.28   13.19 
   2   6  -1  206.56   13.96 
   6  -2  -1  199.88   12.75 
   2   6  -1  222.95   15.55 
   6  -2  -1  200.51   12.95 
  -6   2  -1  221.19   13.27 
   2   6  -1  205.83   13.32 
   6  -2  -1  211.61   12.99 
  -2  -6  -1  215.35   13.63 
  -2  -6  -1  221.03   15.48 
   2   6  -1  220.56   13.30 
  -6   2  -1  217.35   13.30 
  -6   2  -1  221.53   13.29 
   2   6  -1  204.09   13.22 
  -6   2  -1  217.23   13.61 
   2   6   1  212.59   13.15 
  -6   2   1  218.56   13.36 
   6  -2   1  214.39   13.73 
   6  -2   1  231.17   12.85 
   2   6   1  219.65   15.50 
   2   6   1  217.86   13.19 
  -2  -6   1  220.67   13.79 
  -2  -6   1  202.57   13.65 
  -2  -6   1  204.16   13.37 
   2   6   1  219.07   13.94 
  -6   2   1  220.81   15.32 
  -2  -6   1  226.76   15.57 
  -6   2   1  201.21   13.69 
  -6   2   1  230.29   13.43 
  -2  -6   1  218.72   14.06 
   2   6   1  217.61   15.43 
  -6   2   1  230.35   13.46 
  -2  -6   1  203.82   14.02 
  -2  -6   1  227.99   14.70 
   2   6   1  209.12   14.77 
  -6   2   1  208.96   14.50 
   6  -2   1  225.79   13.21 
  -2  -6   1  201.09   15.49 
  -6   2   1  204.04   13.78 
   6  -2   1  216.01   14.42 
  -6   2   1  218.53   13.34 
   2   6   1  224.60   13.22 
   2   6   1  204.31   12.84 
   6  -2   1  197.58   13.62 
   2   6   1  213.98   13.32 
   6  -2   1  196.73   12.83 
   2   6   1  215.86   13.76 
   2   6   1  236.51   13.99 
  -6   2   1  231.31   15.38 
  -3  -6  -1    4.09    0.66 
   3   6  -1    1.26    0.54 
   3   6  -1    3.12    0.66 
   3   6  -1    3.31    0.59 
  -6   3  -1    1.72    0.42 
  -3  -6  -1    2.54    0.59 
  -3  -6  -1    2.02    0.59 
   6  -3  -1    3.79    0.53 
   3   6  -1    1.89    0.58 
  -3  -6  -1    3.53    0.57 
  -3  -6  -1    1.79    0.63 
   6  -3  -1    1.72    0.49 
  -6   3  -1    2.58    0.56 
   6  -3  -1    1.75    0.55 
   6  -3  -1    2.15    0.50 
   3   6  -1    1.66    0.62 
   3   6  -1    1.62    0.53 
  -6   3  -1    2.26    0.40 
   6  -3  -1    2.65    0.57 
   3   6  -1    1.90    0.57 
  -6   3  -1    3.02    0.54 
   6  -3  -1    2.00    0.46 
   3   6  -1    1.74    0.54 
  -3  -6  -1    2.67    0.65 
  -6   3  -1    2.25    0.40 
   6  -3  -1    2.02    0.52 
  -3  -6  -1    3.52    0.57 
  -6   3  -1    2.19    0.50 
  -6   3  -1    1.72    0.42 
  -6   3  -1    2.40    0.46 
   6  -3  -1    1.73    0.59 
  -3  -6  -1    1.33    0.57 
   3   6  -1    2.01    0.69 
   3   6  -1    3.10    0.74 
   6  -3  -1    2.09    0.54 
   3   6  -1    1.20    0.51 
   3   6   1    2.82    0.66 
  -3  -6   1    3.24    0.65 
  -6   3   1    2.84    0.55 
  -6   3   1    2.33    0.50 
   3   6   1    4.24    0.70 
   3   6   1    2.36    0.53 
   6  -3   1    3.28    0.51 
  -3  -6   1    2.41    0.56 
   6  -3   1    2.35    0.46 
  -3  -6   1    3.07    0.77 
   3   6   1    2.14    0.68 
  -6   3   1    1.83    0.42 
  -6   3   1    1.74    0.53 
  -3  -6   1    1.99    0.59 
   6  -3   1    2.71    0.49 
  -6   3   1    2.23    0.56 
  -6   3   1    1.83    0.42 
   3   6   1    2.20    0.50 
   6  -3   1    3.71    0.53 
  -6   3   1    2.83    0.55 
   6  -3   1    3.04    0.43 
  -6   3   1    2.19    0.59 
   6  -3   1    1.66    0.64 
  -3  -6   1    2.00    0.60 
   3   6   1    1.76    0.62 
   6  -3   1    2.75    0.55 
  -3  -6   1    1.85    0.57 
   6  -3   1    2.14    0.44 
  -3  -6   1    2.46    0.65 
  -3  -6   1    2.41    0.56 
  -3  -6   1    3.74    0.75 
   3   6   1    3.72    0.65 
   6  -3   1    3.12    0.43 
   3   6   1    2.31    0.55 
   3   6   1    2.81    0.60 
   3   6   1    2.02    0.55 
   6  -4  -1   37.86    2.96 
   6  -4  -1   38.52    3.02 
   6  -4  -1   46.32    3.40 
  -4  -6  -1   41.00    3.18 
   4   6  -1   40.57    3.25 
   6  -4  -1   45.96    3.24 
   4   6  -1   42.99    3.14 
  -6   4  -1   46.36    3.58 
  -4  -6  -1   47.14    3.40 
  -6   4  -1   44.41    3.54 
   4   6  -1   44.75    3.60 
  -6   4  -1   41.64    3.05 
   6  -4  -1   49.45    3.23 
  -6   4  -1   43.83    3.24 
  -4  -6  -1   44.62    3.12 
   4   6  -1   43.64    3.00 
  -4  -6  -1   50.82    3.36 
   4   6  -1   41.96    3.14 
   6  -4  -1   45.56    3.09 
  -4  -6  -1   44.45    3.12 
   4   6  -1   41.13    3.35 
  -4  -6  -1   42.35    3.13 
  -4  -6  -1   41.40    3.59 
   4   6  -1   42.44    3.54 
  -6   4  -1   44.63    3.10 
  -6   4  -1   41.65    3.04 
   6  -4  -1   49.75    3.32 
  -4  -6  -1   44.21    3.22 
   6  -4  -1   45.28    3.04 
   4   6  -1   45.92    3.18 
   4   6  -1   41.33    3.17 
  -4  -6  -1   44.55    3.67 
   4   6  -1   42.26    3.10 
   6  -4  -1   43.26    3.02 
  -6   4   1   44.10    3.65 
  -4  -6   1   48.21    3.70 
  -4  -6   1   49.71    3.21 
  -6   4   1   48.47    3.11 
   4   6   1   45.31    2.98 
   6  -4   1   44.51    2.98 
   4   6   1   38.85    3.46 
   4   6   1   49.62    3.37 
  -4  -6   1   45.90    3.42 
   6  -4   1   48.35    3.23 
   6  -4   1   42.45    3.32 
  -6   4   1   42.60    3.20 
  -4  -6   1   49.10    3.24 
   4   6   1   42.99    3.07 
  -6   4   1   46.08    3.17 
   4   6   1   44.44    3.13 
  -6   4   1   41.08    3.25 
   6  -4   1   43.30    2.97 
  -6   4   1   48.53    3.11 
  -4  -6   1   48.16    3.77 
  -6   4   1   40.18    3.57 
   6  -4   1   44.75    3.02 
   6  -4   1   41.94    3.21 
  -4  -6   1   47.22    3.33 
   4   6   1   41.76    3.21 
   4   6   1   44.62    3.08 
   6  -4   1   46.11    3.06 
   6  -4   1   40.76    2.91 
   4   6   1   38.58    3.08 
  -4  -6   1   46.22    3.27 
   6  -4   1   46.20    2.96 
  -4  -6   1   49.77    3.22 
   4   6   1   44.46    3.11 
   6  -5  -1    2.26    0.63 
  -5  -6  -1    3.02    0.57 
  -6   5  -1    2.66    0.68 
   6  -5  -1    2.82    0.58 
   5   6  -1    2.90    0.78 
   5   6  -1    3.31    0.68 
  -6   5  -1    3.47    0.65 
   5   6  -1    3.86    0.82 
   6  -5  -1    2.94    0.71 
   6  -5  -1    2.77    0.65 
   5   6  -1    3.33    0.73 
  -5  -6  -1    5.12    0.74 
   6  -5  -1    3.24    0.68 
  -6   5  -1    2.45    0.67 
  -5  -6  -1    3.98    0.77 
   6  -5  -1    2.92    0.75 
  -6   5  -1    3.86    0.63 
   6  -5  -1    3.85    0.65 
  -5  -6  -1    2.93    0.62 
  -5  -6  -1    3.30    0.78 
   5   6  -1    3.78    0.71 
   5   6  -1    4.47    0.76 
   5   6  -1    3.86    0.71 
  -5  -6  -1    3.80    0.77 
  -6   5  -1    3.86    0.63 
  -5  -6  -1    3.01    0.57 
  -6   5  -1    2.18    0.67 
   6  -5  -1    4.04    0.67 
   6  -5   1    3.10    0.67 
   5   6   1    3.04    0.58 
  -6   5   1    2.20    0.70 
   6  -5   1    2.78    0.82 
  -6   5   1    3.51    0.81 
  -6   5   1    3.18    0.79 
   5   6   1    3.70    0.65 
  -6   5   1    4.46    0.73 
   6  -5   1    3.14    0.64 
   6  -5   1    4.45    0.70 
   6  -5   1    2.99    0.65 
  -5  -6   1    3.16    0.75 
  -5  -6   1    3.34    0.70 
   5   6   1    3.03    0.66 
   6  -5   1    2.93    0.66 
   5   6   1    2.98    0.59 
   5   6   1    2.92    0.72 
   6  -5   1    4.80    0.63 
  -5  -6   1    2.20    0.66 
   5   6   1    2.38    0.71 
   6  -5   1    2.64    0.53 
   5   6   1    2.94    0.61 
  -5  -6   1    3.98    0.87 
  -5  -6   1    2.33    0.59 
  -5  -6   1    2.33    0.59 
   6  -5   1    3.76    0.65 
   5   6   1    3.38    0.64 
  -6   6  -1    0.76    0.47 
  -6  -6  -1   -0.57    0.38 
   6  -6  -1   -0.38    0.41 
   6   6  -1   -0.02    0.47 
   6  -6  -1    0.47    0.48 
   6  -6  -1   -0.17    0.34 
  -6   6  -1    0.21    0.51 
   6   6  -1   -0.10    0.42 
  -6  -6  -1    0.28    0.42 
  -6  -6  -1    0.09    0.31 
   6   6  -1    0.61    0.46 
   6   6  -1    0.25    0.41 
  -6   6  -1   -0.59    0.42 
   6   6  -1   -0.32    0.40 
   6  -6  -1    0.63    0.50 
   6  -6  -1   -0.02    0.41 
   6   6  -1    0.39    0.40 
   6  -6  -1   -0.09    0.38 
  -6  -6  -1   -0.16    0.35 
  -6  -6  -1   -0.53    0.46 
  -6  -6  -1   -0.27    0.36 
   6   6  -1    0.20    0.46 
   6   6  -1    0.19    0.38 
   6  -6  -1    0.24    0.44 
  -6  -6  -1    0.09    0.31 
   6  -6   1    0.00    0.40 
  -6  -6   1    0.39    0.48 
   6  -6   1    0.31    0.46 
   6   6   1    0.06    0.37 
   6  -6   1    1.25    0.66 
   6  -6   1    0.41    0.42 
   6   6   1   -0.31    0.32 
   6   6   1   -0.19    0.33 
   6   6   1    0.64    0.48 
   6  -6   1   -0.20    0.39 
   6   6   1    0.09    0.36 
  -6  -6   1    0.36    0.39 
   6   6   1    0.32    0.36 
   6  -6   1    0.78    0.51 
  -6  -6   1   -0.18    0.44 
  -6   6   1    0.11    0.49 
   6  -6   1    0.70    0.42 
   6   6   1    0.73    0.46 
  -6  -6   1    0.16    0.49 
   6   6   1    2.07    0.57 
  -6  -6   1    0.36    0.39 
   6  -6   1    0.07    0.38 
  -6  -6   1    0.41    0.47 
   7   6  -1    3.11    0.69 
  -7  -6  -1    2.14    0.74 
  -7  -6  -1    1.99    0.56 
  -7  -6  -1    3.58    0.81 
   7   6  -1    6.30    0.83 
   7   6  -1    3.55    0.84 
   7   6  -1    3.14    0.62 
  -7  -6  -1    1.99    0.55 
   6  -7  -1    4.09    0.77 
   7   6  -1    2.66    0.59 
  -6   7  -1    2.03    0.84 
   6  -7  -1    3.54    0.84 
   6  -7  -1    3.37    0.80 
   7   6  -1    3.15    0.71 
   6  -7  -1    3.39    0.79 
  -7  -6  -1    3.59    0.70 
  -7  -6  -1    3.07    0.76 
   7   6  -1    3.96    0.80 
   6  -7  -1    3.14    0.85 
   6  -7  -1    3.59    0.89 
   6  -7  -1    1.97    0.66 
   7   6  -1    4.57    0.91 
   7   6   1    2.57    0.57 
  -6   7   1    3.94    0.96 
   6  -7   1    3.56    0.82 
   7   6   1    1.95    0.67 
   6  -7   1    2.70    0.76 
  -7  -6   1    3.87    0.80 
   7   6   1    4.06    0.65 
   6  -7   1    3.61    0.83 
   6  -7   1    2.76    0.69 
   7   6   1    4.58    0.56 
   6  -7   1    2.21    0.71 
   6  -7   1    3.66    0.73 
   6  -7   1    4.02    0.96 
  -7  -6   1    3.86    0.87 
   6  -7   1    3.16    0.75 
   7   6   1    3.50    0.79 
   7   6   1    3.29    0.63 
   7   6   1    3.87    0.72 
  -7  -6   1    2.98    0.67 
  -7  -6   1    2.98    0.67 
   7   5  -1    1.26    0.51 
   5  -7  -1    0.86    0.57 
   7   5  -1    1.59    0.46 
   7   5  -1    0.69    0.43 
   5  -7  -1    0.85    0.57 
   5  -7  -1    1.57    0.51 
   5  -7  -1    1.00    0.61 
   7   5  -1    1.73    0.53 
  -5   7  -1    1.22    0.65 
   7   5  -1    1.11    0.54 
  -7  -5  -1    1.39    0.48 
  -7  -5  -1    1.38    0.49 
  -7  -5  -1    1.37    0.41 
  -7  -5  -1    1.37    0.41 
   5  -7  -1    0.70    0.50 
   7   5  -1    0.77    0.45 
   5  -7  -1    2.58    0.70 
   7   5  -1    1.50    0.45 
  -7  -5  -1    1.39    0.53 
   5  -7  -1    1.56    0.54 
   7   5  -1    1.99    0.67 
   5  -7  -1    0.84    0.54 
  -5   7   1    1.80    0.75 
   7   5   1    0.69    0.44 
   5  -7   1    1.13    0.61 
  -7  -5   1    1.26    0.47 
  -7  -5   1    2.28    0.58 
   5  -7   1    0.89    0.59 
   5  -7   1    1.74    0.57 
  -7  -5   1    1.24    0.55 
   7   5   1    1.70    0.40 
   5  -7   1    2.22    0.69 
   7   5   1    1.08    0.38 
  -5   7   1    2.66    0.83 
  -5   7   1    0.73    0.55 
  -7  -5   1    1.26    0.46 
   7   5   1    0.54    0.45 
   5  -7   1    1.83    0.61 
  -5   7   1    1.98    0.70 
  -5   7   1    1.68    0.59 
   5  -7   1    0.54    0.52 
   7   5   1    0.84    0.42 
   7   5   1    1.46    0.41 
  -7  -5   1    1.61    0.59 
  -7  -5   1    0.77    0.55 
   5  -7   1    1.24    0.60 
   5  -7   1    0.17    0.48 
   4  -7  -1   34.33    2.80 
  -4   7  -1   35.92    2.94 
   7   4  -1   37.84    2.76 
   7   4  -1   38.41    2.61 
   4  -7  -1   39.01    2.66 
   4  -7  -1   33.76    3.00 
   4  -7  -1   43.08    2.93 
  -7  -4  -1   38.26    2.61 
   4  -7  -1   38.19    2.82 
   4  -7  -1   34.39    2.78 
   4  -7  -1   36.48    2.98 
  -4   7  -1   37.14    3.21 
  -4   7  -1   38.74    2.97 
   7   4  -1   40.41    2.58 
   7   4  -1   41.97    2.71 
  -4   7  -1   38.92    3.07 
   4  -7  -1   34.20    3.08 
  -7  -4  -1   35.41    3.02 
   7   4  -1   33.10    2.96 
   7   4  -1   36.70    2.59 
   7   4  -1   37.49    2.86 
   4  -7  -1   40.20    2.90 
  -7  -4  -1   39.39    3.03 
   4  -7  -1   36.93    2.79 
  -4   7  -1   36.19    2.98 
  -7  -4  -1   37.32    2.58 
   7   4  -1   39.09    2.54 
  -7  -4  -1   37.41    2.58 
  -7  -4   1   37.96    3.18 
  -4   7   1   36.36    3.25 
  -4   7   1   37.73    2.89 
   4  -7   1   32.80    2.73 
   7   4   1   45.48    2.65 
  -7  -4   1   40.46    2.71 
  -4   7   1   41.39    3.03 
  -4   7   1   39.78    3.11 
  -7  -4   1   39.35    2.71 
  -4   7   1   36.32    2.94 
   7   4   1   36.69    2.40 
   4  -7   1   40.03    3.05 
   4  -7   1   37.73    2.86 
  -7  -4   1   42.55    2.87 
   4  -7   1   37.28    3.03 
   4  -7   1   38.00    2.50 
   7   4   1   34.91    2.40 
   4  -7   1   36.95    3.11 
   7   4   1   38.07    2.86 
   7   4   1   34.96    2.71 
   4  -7   1   38.31    2.96 
   4  -7   1   31.09    2.72 
   7   4   1   36.00    2.61 
  -7  -4   1   40.51    2.71 
  -7  -4   1   38.57    3.15 
   4  -7   1   39.28    2.82 
   7   4   1   37.68    2.71 
  -4   7   1   38.23    2.98 
   4  -7   1   39.88    2.82 
   7   3  -1    4.20    0.64 
   3  -7  -1    4.32    0.84 
   7   3  -1    4.76    0.51 
   3  -7  -1    3.30    0.71 
  -7  -3  -1    4.43    0.60 
   7   3  -1    4.00    0.69 
   3  -7  -1    3.14    0.74 
   3  -7  -1    3.44    0.71 
  -3   7  -1    2.91    0.70 
   3  -7  -1    3.61    0.71 
   7   3  -1    4.65    0.52 
  -7  -3  -1    3.58    0.42 
   3  -7  -1    4.48    0.66 
  -7  -3  -1    3.59    0.42 
   7   3  -1    4.13    0.59 
   3  -7  -1    2.77    0.70 
   7   3  -1    4.43    0.66 
   7   3  -1    4.21    0.55 
   3  -7  -1    4.60    0.85 
  -7  -3  -1    3.30    0.56 
  -7  -3  -1    4.11    0.46 
  -3   7  -1    2.38    0.77 
   7   3  -1    4.46    0.69 
  -3   7  -1    3.96    0.87 
  -3   7  -1    3.66    0.80 
   7   3  -1    3.76    0.54 
  -3   7  -1    4.49    0.84 
   3  -7  -1    2.74    0.77 
  -3   7  -1    5.60    0.94 
  -7  -3   1    4.45    0.75 
  -7  -3   1    3.20    0.54 
  -3   7   1    4.35    0.90 
   7   3   1    3.88    0.53 
   3  -7   1    4.03    0.80 
  -3   7   1    5.03    0.92 
   7   3   1    4.11    0.54 
  -3   7   1    5.62    0.91 
  -7  -3   1    3.10    0.55 
   3  -7   1    5.02    0.64 
  -3   7   1    3.95    0.93 
  -3   7   1    3.29    0.73 
   7   3   1    3.32    0.53 
  -7  -3   1    5.17    0.70 
   3  -7   1    3.35    0.70 
   3  -7   1    3.63    0.81 
  -3   7   1    4.61    0.82 
   3  -7   1    3.96    0.73 
  -3   7   1    2.96    0.75 
   3  -7   1    2.75    0.72 
  -7  -3   1    3.82    0.68 
   3  -7   1    4.44    0.88 
   3  -7   1    3.09    0.74 
   3  -7   1    3.51    0.81 
   3  -7   1    3.38    0.67 
   7   3   1    4.88    0.55 
  -7  -3   1    3.20    0.54 
   2  -7  -1   35.94    2.49 
  -2   7  -1   29.38    2.79 
   7   2  -1   34.91    2.31 
  -2   7  -1   27.81    2.52 
  -2   7  -1   33.78    2.55 
   7   2  -1   28.35    2.45 
   2  -7  -1   28.64    2.61 
  -7  -2  -1   31.93    2.46 
   2  -7  -1   31.25    2.69 
   2  -7  -1   32.85    2.41 
   2  -7  -1   31.06    2.42 
   2  -7  -1   30.33    2.51 
  -2   7  -1   27.34    2.50 
  -2   7  -1   27.72    2.56 
   7   2  -1   33.98    2.41 
  -2   7  -1   30.26    2.54 
   2  -7  -1   30.47    2.46 
  -2   7  -1   34.50    2.63 
  -7  -2  -1   30.50    2.44 
   2  -7  -1   31.39    2.51 
   7   2  -1   31.48    2.14 
   2  -7  -1   34.11    2.46 
   2  -7  -1   29.88    2.39 
   7   2  -1   32.84    2.37 
   7   2  -1   33.64    2.15 
  -2   7   1   33.18    2.39 
   7   2   1   31.54    2.20 
  -2   7   1   28.90    2.48 
   2  -7   1   31.01    2.43 
   2  -7   1   37.54    2.43 
  -2   7   1   27.95    2.51 
   2  -7   1   34.17    2.45 
  -7  -2   1   31.77    2.23 
  -2   7   1   36.52    2.64 
  -7  -2   1   33.35    2.21 
   7   2   1   32.70    2.30 
   2  -7   1   30.98    2.58 
   2  -7   1   32.02    2.64 
   2  -7   1   34.23    2.37 
  -7  -2   1   31.79    2.61 
   2  -7   1   32.05    2.67 
   2  -7   1   32.82    2.50 
   7   2   1   30.04    2.18 
  -2   7   1   30.41    2.78 
  -7  -2   1   31.78    2.22 
  -2   7   1   31.89    2.55 
  -2   7   1   31.61    2.63 
  -2   7   1   33.83    2.58 
  -7  -2   1   33.00    2.63 
   2  -7   1   34.48    2.43 
   2  -7   1   28.15    2.49 
   7   1  -1   55.24    3.52 
   7   1  -1   62.75    3.80 
  -1   7  -1   54.31    4.43 
   1  -7  -1   52.16    4.25 
  -1   7  -1   54.48    3.96 
   1  -7  -1   53.58    3.84 
  -1   7  -1   58.96    4.12 
   1  -7  -1   61.77    3.85 
   1  -7  -1   55.07    3.99 
   1  -7  -1   53.80    4.15 
   7   1  -1   51.39    3.80 
  -1   7  -1   56.21    4.03 
  -1   7  -1   49.44    4.04 
   1  -7  -1   55.18    3.83 
   1  -7  -1   52.95    4.06 
   7   1  -1   59.53    3.86 
  -7  -1  -1   50.81    4.08 
  -1   7  -1   60.20    4.00 
   7   1  -1   59.01    4.04 
  -1   7  -1   60.12    3.98 
  -7  -1  -1   51.34    4.07 
   1  -7  -1   59.30    4.02 
   7   1  -1   57.84    3.52 
   1  -7  -1   62.04    4.03 
   1  -7  -1   60.76    3.92 
  -1   7  -1   55.47    3.71 
  -1   7   1   46.44    4.00 
  -7  -1   1   52.05    4.24 
   1  -7   1   57.31    4.18 
   7   1   1   54.64    3.65 
   1  -7   1   61.29    3.90 
  -7  -1   1   57.74    3.68 
   1  -7   1   57.77    3.79 
   1  -7   1   52.43    3.94 
   7   1   1   60.01    3.83 
  -1   7   1   53.10    3.96 
  -1   7   1   53.71    4.39 
  -1   7   1   56.16    3.75 
  -7  -1   1   52.92    4.25 
   1  -7   1   49.21    4.02 
  -7  -1   1   57.78    3.68 
   1  -7   1   62.55    3.89 
  -1   7   1   59.00    4.10 
   1  -7   1   54.20    3.85 
  -1   7   1   50.34    4.04 
  -7  -1   1   59.53    3.65 
   1  -7   1   54.48    3.93 
   1  -7   1   61.41    4.30 
  -1   7   1   52.45    3.94 
  -1   7   1   52.81    3.92 
   7   1   1   55.17    3.63 
   0   7  -1  159.63    9.58 
   7   0  -1  137.51    9.12 
   7   0  -1  161.38    9.68 
   7   0  -1  145.71    8.49 
   0  -7  -1  127.50    9.06 
   0   7  -1  150.21    9.02 
   0  -7  -1  131.99    9.49 
   0   7  -1  135.76    8.64 
   7   0  -1  124.92    8.52 
   0   7  -1  127.19    9.00 
  -7   0  -1  148.10   10.06 
   0  -7  -1  145.55    9.93 
   0  -7  -1  151.49    9.40 
   0   7  -1  142.37    9.02 
   7   0  -1  139.64    9.12 
   0   7  -1  138.61    9.45 
   0  -7  -1  138.31    9.27 
   0  -7  -1  136.35    9.68 
   0  -7  -1  131.94    9.12 
  -7   0  -1  126.33   10.01 
   0   7  -1  134.36    9.37 
   7   0  -1  141.50    8.54 
   7   0  -1  149.97    9.16 
   0   7  -1  152.81   10.13 
   7   0   1  129.04    8.95 
   0  -7   1  118.88    9.81 
   0  -7   1  136.04    9.05 
  -7   0   1  146.73    8.90 
  -7   0   1  136.97    8.83 
  -7   0   1  138.66   10.19 
   0   7   1  141.59    9.37 
   0  -7   1  141.81    9.53 
  -7   0   1  130.46   10.13 
   0  -7   1  157.34    9.00 
  -7   0   1  146.75    8.89 
   7   0   1  145.01    9.48 
   0   7   1  153.92    9.03 
   0  -7   1  141.84    9.15 
   0  -7   1  153.46    8.94 
   0   7   1  157.76    9.15 
   0  -7   1  140.98    9.28 
   0   7   1  141.37   10.06 
  -7   0   1  136.89    8.85 
   0   7   1  130.57    8.94 
   0   7   1  136.71    8.67 
   7   0   1  144.08    8.97 
   0  -7   1  141.66    8.70 
   0   7   1  146.59    9.52 
   0  -7   1  122.37    9.39 
   0   7   1  148.85    9.47 
  -7   0   1  147.83    9.11 
  -1  -7  -1   52.84    3.88 
   7  -1  -1   56.40    3.52 
   1   7  -1   49.17    3.64 
  -1  -7  -1   59.31    3.83 
  -1  -7  -1   53.57    3.85 
   1   7  -1   50.97    3.99 
   1   7  -1   56.98    3.92 
  -7   1  -1   54.25    3.50 
   7  -1  -1   52.81    3.97 
   7  -1  -1   56.00    3.47 
   7  -1  -1   49.96    3.76 
   1   7  -1   59.47    3.94 
   1   7  -1   54.74    4.00 
   1   7  -1   54.94    4.36 
  -1  -7  -1   57.65    4.49 
   7  -1  -1   54.97    3.52 
   7  -1  -1   54.62    3.76 
   1   7  -1   60.59    3.94 
  -7   1  -1   55.32    4.09 
  -7   1  -1   53.79    4.06 
  -1  -7  -1   57.33    4.10 
   7  -1  -1   55.99    3.82 
  -7   1  -1   53.66    3.47 
  -7   1  -1   53.61    3.47 
  -7   1  -1   54.30    3.50 
  -1  -7  -1   57.72    4.23 
   7  -1  -1   56.90    3.54 
  -1  -7  -1   56.05    3.95 
  -1  -7  -1   62.79    4.00 
   7  -1   1   55.39    3.66 
  -1  -7   1   54.36    3.90 
   1   7   1   51.53    4.31 
  -1  -7   1   55.21    3.86 
   1   7   1   64.82    3.93 
  -7   1   1   53.93    3.61 
  -1  -7   1   54.50    4.00 
  -7   1   1   53.92    3.60 
   1   7   1   65.15    4.23 
   1   7   1   49.69    3.85 
   1   7   1   57.39    3.89 
  -7   1   1   55.80    4.23 
  -1  -7   1   47.60    4.02 
   1   7   1   50.41    3.98 
  -7   1   1   56.35    3.80 
   7  -1   1   57.48    3.85 
   1   7   1   51.36    3.94 
  -7   1   1   56.28    3.67 
   1   7   1   49.98    3.83 
  -1  -7   1   48.14    4.14 
   7  -1   1   54.20    3.89 
  -7   1   1   56.32    3.68 
   7  -1   1   58.91    3.44 
  -1  -7   1   55.73    3.82 
   1   7   1   50.56    3.64 
  -1  -7   1   56.56    3.96 
   7  -1   1   52.59    3.65 
  -7   1   1   61.16    4.29 
  -2  -7  -1   31.39    2.40 
   7  -2  -1   35.00    2.37 
   7  -2  -1   28.69    2.19 
  -7   2  -1   30.86    2.18 
   2   7  -1   35.18    2.61 
   7  -2  -1   32.13    2.42 
   2   7  -1   35.20    2.73 
  -2  -7  -1   35.34    2.48 
   2   7  -1   28.57    2.72 
   2   7  -1   32.44    2.52 
  -7   2  -1   31.54    2.13 
  -7   2  -1   30.88    2.18 
   7  -2  -1   30.73    2.47 
  -7   2  -1   30.65    2.53 
   2   7  -1   29.54    2.47 
  -2  -7  -1   32.58    2.59 
  -7   2  -1   27.92    2.49 
  -2  -7  -1   32.92    2.57 
   7  -2  -1   27.22    2.12 
   7  -2  -1   31.99    2.50 
   7  -2  -1   31.67    2.21 
   7  -2  -1   31.24    2.20 
   7  -2  -1   30.67    2.16 
  -2  -7  -1   37.50    2.49 
   2   7  -1   29.39    2.31 
   7  -2  -1   32.04    2.36 
   2   7  -1   38.74    2.60 
  -2  -7  -1   28.17    2.58 
  -2  -7  -1   34.78    2.53 
   2   7  -1   33.98    2.54 
   2   7  -1   32.66    2.54 
  -7   2  -1   31.56    2.13 
  -2  -7  -1   32.81    2.84 
   7  -2   1   31.35    2.04 
   2   7   1   30.67    2.78 
   7  -2   1   35.11    2.28 
   2   7   1   26.94    2.46 
  -7   2   1   32.09    2.31 
  -2  -7   1   28.32    2.47 
   2   7   1   38.50    2.52 
  -2  -7   1   31.54    2.41 
   2   7   1   35.44    2.51 
   7  -2   1   33.14    2.03 
  -2  -7   1   30.69    2.44 
  -7   2   1   32.09    2.31 
  -7   2   1   34.47    2.63 
   7  -2   1   35.15    2.23 
   7  -2   1   32.29    2.48 
   7  -2   1   32.92    2.29 
   2   7   1   27.57    2.43 
  -7   2   1   29.91    2.63 
  -2  -7   1   27.23    2.44 
  -7   2   1   32.90    2.41 
   2   7   1   31.84    2.46 
   2   7   1   31.71    2.64 
   2   7   1   28.60    2.28 
  -2  -7   1   30.52    2.84 
   2   7   1   29.97    2.44 
  -2  -7   1   30.28    2.63 
  -7   2   1   27.09    2.19 
  -2  -7   1   32.34    2.55 
   7  -2   1   34.90    2.15 
   7  -2   1   34.52    2.38 
  -2  -7   1   29.12    2.59 
   2   7   1   32.24    2.78 
  -7   2   1   27.08    2.19 
   3   7  -1    4.12    0.82 
   3   7  -1    5.16    0.97 
   7  -3  -1    3.55    0.55 
   7  -3  -1    3.31    0.78 
   3   7  -1    4.43    0.72 
   7  -3  -1    2.49    0.56 
   3   7  -1    2.58    0.65 
  -3  -7  -1    5.38    0.76 
   3   7  -1    3.57    0.90 
  -7   3  -1    2.85    0.61 
  -7   3  -1    3.67    0.52 
   7  -3  -1    4.66    0.68 
  -3  -7  -1    3.51    0.75 
   3   7  -1    3.75    0.78 
   3   7  -1    3.32    0.73 
   7  -3  -1    2.68    0.64 
  -7   3  -1    3.14    0.62 
  -3  -7  -1    3.18    0.71 
  -7   3  -1    3.67    0.51 
  -7   3  -1    3.51    0.56 
  -7   3  -1    3.50    0.56 
   7  -3  -1    2.71    0.61 
  -3  -7  -1    4.19    0.88 
  -3  -7  -1    4.36    0.84 
   7  -3  -1    2.67    0.52 
  -7   3  -1    3.45    0.56 
  -3  -7  -1    3.17    0.80 
   3   7  -1    3.28    0.75 
   3   7  -1    3.18    0.74 
   7  -3  -1    3.87    0.61 
  -7   3  -1    3.45    0.62 
   7  -3  -1    3.19    0.65 
   7  -3   1    3.52    0.59 
   3   7   1    5.37    0.93 
  -3  -7   1    2.72    0.75 
  -7   3   1    5.13    0.77 
   3   7   1    2.42    0.58 
  -3  -7   1    3.45    0.79 
   3   7   1    3.57    0.77 
  -7   3   1    4.28    0.66 
   7  -3   1    3.87    0.47 
  -7   3   1    3.86    0.75 
   7  -3   1    2.78    0.58 
  -7   3   1    3.03    0.54 
   7  -3   1    3.75    0.52 
  -3  -7   1    4.64    0.81 
   3   7   1    4.56    0.79 
   3   7   1    3.13    0.64 
   3   7   1    4.00    0.89 
   7  -3   1    4.43    0.87 
   7  -3   1    4.67    0.62 
  -3  -7   1    2.51    0.70 
  -3  -7   1    3.30    0.72 
  -7   3   1    4.27    0.66 
   7  -3   1    3.36    0.52 
   7  -3   1    4.16    0.57 
  -3  -7   1    4.27    0.77 
   7  -3   1    4.26    0.45 
  -7   3   1    3.28    0.68 
   3   7   1    3.39    0.75 
   3   7   1    5.74    0.84 
  -3  -7   1    5.14    0.91 
   3   7   1    3.50    0.72 
  -7   3   1    3.03    0.54 
  -4  -7  -1   37.09    2.79 
   4   7  -1   42.53    2.73 
   4   7  -1   34.39    3.17 
   7  -4  -1   33.02    2.95 
  -7   4  -1   38.06    3.14 
  -7   4  -1   36.58    2.68 
  -7   4  -1   38.71    2.88 
  -4  -7  -1   37.70    2.89 
  -4  -7  -1   37.05    2.80 
   4   7  -1   37.07    3.09 
  -7   4  -1   36.58    2.67 
   4   7  -1   37.84    2.79 
   7  -4  -1   37.31    2.62 
  -4  -7  -1   42.32    3.33 
   4   7  -1   42.86    3.02 
   4   7  -1   34.74    2.82 
   7  -4  -1   37.71    2.66 
   7  -4  -1   38.50    2.90 
   7  -4  -1   34.54    2.84 
  -7   4  -1   40.05    3.14 
   7  -4  -1   38.35    2.73 
   4   7  -1   39.54    2.86 
   4   7  -1   34.00    2.81 
   4   7  -1   41.74    2.95 
   7  -4  -1   39.50    2.89 
   7  -4  -1   38.40    2.69 
   7  -4  -1   36.12    2.68 
  -4  -7  -1   39.51    2.98 
  -7   4  -1   37.56    2.73 
   4   7   1   35.84    2.81 
   7  -4   1   40.96    2.58 
   4   7   1   33.76    3.15 
  -7   4   1   35.76    2.78 
   4   7   1   34.84    2.76 
   7  -4   1   37.20    2.91 
   7  -4   1   41.15    2.56 
  -4  -7   1   37.35    2.92 
  -7   4   1   40.76    2.76 
   4   7   1   37.85    2.91 
   4   7   1   32.76    2.77 
   7  -4   1   34.93    2.62 
  -7   4   1   40.79    2.76 
  -7   4   1   38.03    2.93 
   4   7   1   37.84    2.80 
  -7   4   1   40.66    3.22 
   4   7   1   33.60    2.64 
  -4  -7   1   37.38    3.05 
   7  -4   1   37.86    2.61 
  -4  -7   1   36.08    2.95 
   4   7   1   32.84    2.96 
  -4  -7   1   36.04    2.88 
  -7   4   1   46.26    3.35 
   7  -4   1   37.54    2.98 
   7  -4   1   41.71    2.82 
   7  -4   1   38.02    2.62 
   7  -5  -1    1.64    0.53 
  -5  -7  -1    1.62    0.51 
  -5  -7  -1    2.23    0.63 
   5   7  -1    2.07    0.67 
   7  -5  -1    0.91    0.46 
   5   7  -1    1.81    0.63 
   5   7  -1    1.19    0.62 
   7  -5  -1    2.26    0.67 
  -7   5  -1    1.48    0.54 
   7  -5  -1    1.12    0.50 
  -5  -7  -1    2.21    0.70 
  -7   5  -1    1.31    0.46 
   5   7  -1    1.21    0.57 
  -7   5  -1    1.51    0.59 
   5   7  -1    2.11    0.61 
  -7   5  -1    1.57    0.61 
   7  -5  -1    1.20    0.74 
  -7   5  -1    1.43    0.61 
   7  -5  -1    1.90    0.62 
   7  -5  -1    2.16    0.65 
  -7   5  -1    1.31    0.46 
  -5  -7  -1    0.83    0.58 
   5   7  -1    1.02    0.61 
  -5  -7  -1    1.62    0.51 
   7  -5  -1    1.72    0.61 
   5   7  -1    1.13    0.55 
   5   7   1    1.73    0.65 
  -7   5   1    1.30    0.64 
   7  -5   1    1.81    0.55 
   5   7   1    1.03    0.50 
   5   7   1    1.11    0.51 
   7  -5   1    1.30    0.74 
   5   7   1    1.31    0.62 
   7  -5   1    1.65    0.47 
   5   7   1    1.42    0.57 
   7  -5   1    1.51    0.46 
   5   7   1    2.16    0.61 
   7  -5   1    0.53    0.47 
   7  -5   1    1.75    0.55 
   7  -5   1    2.04    0.58 
  -7   5   1    1.96    0.70 
   5   7   1    0.74    0.48 
   5   7   1    1.78    0.58 
  -5  -7   1    0.96    0.55 
   7  -5   1    1.00    0.50 
  -7   5   1    1.38    0.54 
  -5  -7   1    1.31    0.59 
  -7   6  -1    3.15    0.72 
   6   7  -1    5.11    0.93 
   7  -6  -1    3.79    0.96 
  -6  -7  -1    2.36    0.78 
   7  -6  -1    2.78    0.78 
  -6  -7  -1    2.78    0.67 
   7  -6  -1    3.48    0.72 
   7  -6  -1    3.30    0.80 
   6   7  -1    2.98    0.71 
  -6  -7  -1    3.00    0.82 
  -6  -7  -1    2.73    0.73 
   6   7  -1    3.07    0.71 
   7  -6  -1    3.02    0.80 
   6   7  -1    2.80    0.80 
   7  -6  -1    2.90    0.66 
   7  -6  -1    4.46    0.84 
   6   7  -1    2.60    0.70 
   6   7  -1    3.57    0.80 
  -7   6  -1    3.28    0.87 
   6   7  -1    2.94    0.86 
   7  -6  -1    3.79    0.82 
  -6  -7  -1    2.78    0.67 
   7  -6   1    2.90    0.73 
   6   7   1    3.68    0.86 
   7  -6   1    3.40    0.77 
  -6  -7   1    3.78    0.80 
   6   7   1    3.25    0.68 
   6   7   1    2.67    0.61 
   6   7   1    3.05    0.70 
  -6  -7   1    4.04    0.84 
   7  -6   1    4.03    0.68 
   6   7   1    3.17    0.66 
   7  -6   1    3.87    0.75 
   7  -6   1    3.89    0.76 
   7  -6   1    2.13    0.57 
   6   7   1    5.54    1.00 
   6   7   1    2.58    0.65 
   6   7   1    2.63    0.71 
  -7   6   1    4.30    0.95 
   7   7  -1   -0.17    0.42 
   7  -7  -1   -0.07    0.49 
   7   7  -1    0.16    0.49 
   7  -7  -1    0.23    0.55 
   7  -7  -1    0.63    0.59 
   7   7  -1    0.29    0.48 
   7   7  -1   -0.19    0.47 
   7  -7  -1    0.18    0.46 
   7   7  -1   -0.17    0.51 
   7  -7  -1    0.94    0.54 
   7   7  -1    0.51    0.47 
  -7   7  -1    1.54    0.75 
  -7  -7  -1    0.27    0.60 
  -7  -7  -1   -0.12    0.42 
   7   7  -1    0.49    0.55 
   7  -7  -1   -0.22    0.51 
  -7  -7  -1   -0.12    0.42 
   7  -7   1   -0.28    0.48 
   7   7   1    0.29    0.43 
   7  -7   1   -0.43    0.41 
   7  -7   1    0.37    0.51 
   7   7   1    0.05    0.37 
   7   7   1    1.16    0.55 
   7   7   1    0.14    0.38 
   7   7   1    0.48    0.57 
   7  -7   1    0.02    0.43 
   7   7   1   -0.02    0.43 
   7   7   1   -0.15    0.51 
  -7  -7   1    0.27    0.56 
  -7   7   1    0.57    0.69 
  -7  -7   1    0.68    0.54 
  -7  -7   1    0.68    0.54 
   7  -7   1   -0.38    0.50 
   7  -7   1   -0.27    0.37 
   7   7   1    0.29    0.53 
   7  -8  -1    8.14    1.16 
   8   7  -1    8.32    1.22 
   8   7  -1    8.65    1.14 
   7  -8  -1    9.18    1.35 
   8   7  -1   10.27    1.13 
   8   7  -1   10.41    1.05 
   8   7  -1    8.45    1.31 
   7  -8  -1   10.92    1.30 
  -8  -7  -1    8.88    1.15 
  -8  -7  -1    8.88    1.15 
   8   7  -1    9.01    1.18 
   7  -8  -1    8.20    1.39 
   7  -8  -1    9.36    1.32 
   7  -8  -1    8.45    1.42 
  -7   8  -1   10.26    1.58 
   8   7  -1   11.20    1.44 
   8   7   1    7.85    0.97 
  -7   8   1    8.98    1.50 
   8   7   1    8.35    1.05 
   8   7   1    9.28    0.97 
   7  -8   1    8.98    1.19 
   8   7   1   11.31    1.38 
   7  -8   1   10.19    1.40 
   7  -8   1    9.27    1.31 
   7  -8   1    9.68    1.39 
   7  -8   1    6.97    1.17 
   8   7   1   10.02    1.19 
   7  -8   1    9.67    1.20 
   8   7   1    8.28    1.20 
  -8  -6  -1   29.39    2.51 
   6  -8  -1   34.70    2.79 
   8   6  -1   33.11    2.47 
   8   6  -1   34.18    2.92 
   6  -8  -1   26.55    2.82 
   8   6  -1   35.09    2.64 
   8   6  -1   33.85    2.45 
  -6   8  -1   38.09    3.10 
  -8  -6  -1   29.38    2.51 
   8   6  -1   33.81    2.78 
   6  -8  -1   36.14    2.70 
   8   6  -1   31.26    2.33 
  -8  -6  -1   30.98    2.54 
   6  -8  -1   28.71    2.63 
   8   6  -1   32.10    2.61 
   6  -8  -1   32.23    2.65 
   6  -8  -1   32.12    2.73 
   6  -8  -1   35.17    3.03 
   6  -8   1   32.22    2.67 
   6  -8   1   36.46    2.95 
   6  -8   1   38.73    2.77 
   6  -8   1   34.04    2.64 
   6  -8   1   34.67    3.00 
   8   6   1   32.75    2.48 
  -8  -6   1   29.39    2.58 
  -6   8   1   34.69    3.01 
  -8  -6   1   29.35    2.58 
   8   6   1   36.14    2.30 
   8   6   1   36.22    2.31 
   6  -8   1   37.95    3.04 
   8   6   1   34.30    2.82 
   6  -8   1   33.02    2.72 
   8   6   1   31.95    2.63 
   6  -8   1   33.31    2.61 
   8   6   1   36.42    2.52 
   5  -8  -1   18.88    1.97 
   8   5  -1   17.44    1.86 
   8   5  -1   20.50    1.58 
   8   5  -1   21.38    1.73 
   5  -8  -1   20.75    2.05 
   5  -8  -1   18.42    1.81 
   8   5  -1   19.82    1.84 
  -8  -5  -1   20.05    1.65 
   8   5  -1   20.53    1.60 
   5  -8  -1   18.42    1.74 
   5  -8  -1   23.08    2.01 
   8   5  -1   21.30    1.75 
  -8  -5  -1   19.83    1.63 
  -5   8  -1   19.04    1.99 
  -5   8  -1   19.26    2.08 
  -8  -5  -1   19.88    1.63 
   5  -8  -1   17.79    1.78 
   8   5  -1   19.39    1.45 
   5  -8  -1   23.60    1.96 
   5  -8   1   19.67    1.88 
  -8  -5   1   16.71    1.93 
   5  -8   1   18.12    1.92 
   8   5   1   19.94    1.69 
   5  -8   1   17.94    1.92 
  -8  -5   1   19.16    1.69 
   5  -8   1   20.16    1.79 
   8   5   1   20.54    1.79 
   8   5   1   19.82    1.61 
  -8  -5   1   19.15    1.69 
  -5   8   1   17.59    2.05 
   5  -8   1   22.24    1.99 
  -8  -5   1   21.09    1.77 
   5  -8   1   23.57    1.97 
   8   5   1   19.22    1.34 
   5  -8   1   21.67    2.07 
   5  -8   1   17.87    1.76 
  -5   8   1   21.30    2.01 
   8   5   1   18.24    1.33 
   4  -8  -1    1.16    0.63 
   4  -8  -1    3.27    0.78 
  -4   8  -1    3.42    0.86 
   8   4  -1    1.97    0.55 
   4  -8  -1    0.89    0.63 
  -4   8  -1    2.44    0.71 
  -8  -4  -1    1.32    0.39 
   4  -8  -1    2.45    0.78 
  -8  -4  -1    1.51    0.49 
   8   4  -1    2.09    0.59 
  -4   8  -1    1.64    0.75 
   4  -8  -1    2.23    0.64 
   8   4  -1    1.84    0.45 
  -8  -4  -1    1.99    0.46 
  -4   8  -1    1.21    0.65 
   8   4  -1    2.29    0.46 
   4  -8  -1    3.41    0.84 
   4  -8  -1    1.76    0.53 
  -4   8  -1    2.23    0.78 
   8   4  -1    1.52    0.48 
  -8  -4  -1    1.32    0.39 
   4  -8  -1    1.85    0.67 
   8   4  -1    3.18    0.69 
   4  -8  -1    2.09    0.66 
  -4   8   1    1.52    0.65 
  -4   8   1    2.58    0.72 
   8   4   1    1.57    0.46 
   4  -8   1    2.47    0.76 
   4  -8   1    1.80    0.63 
   4  -8   1    3.27    0.89 
   4  -8   1    1.70    0.58 
   8   4   1    2.21    0.48 
   8   4   1    1.43    0.45 
   4  -8   1    1.89    0.39 
  -8  -4   1    2.12    0.51 
  -8  -4   1    2.39    0.55 
   4  -8   1    1.25    0.59 
   8   4   1    0.96    0.44 
  -8  -4   1    2.12    0.51 
  -4   8   1    1.13    0.58 
   4  -8   1    2.27    0.74 
  -8  -4   1    1.48    0.55 
  -8  -4   1    1.71    0.65 
   4  -8   1    2.01    0.75 
  -4   8   1    1.49    0.69 
   4  -8   1    1.12    0.64 
  -4   8   1    2.32    0.76 
  -4   8   1    1.58    0.69 
   3  -8  -1   42.84    3.63 
   3  -8  -1   40.98    3.30 
  -3   8  -1   50.86    3.56 
   8   3  -1   48.23    3.12 
   3  -8  -1   42.84    3.25 
   3  -8  -1   46.15    3.31 
   3  -8  -1   49.02    3.22 
   8   3  -1   45.44    2.89 
  -3   8  -1   49.31    3.88 
  -8  -3  -1   43.21    2.92 
  -3   8  -1   41.16    3.42 
   3  -8  -1   42.02    3.37 
  -3   8  -1   44.15    3.45 
   3  -8  -1   44.88    3.27 
   8   3  -1   40.63    3.02 
   3  -8  -1   39.17    3.51 
  -8  -3  -1   45.81    3.42 
  -3   8  -1   47.00    3.57 
   8   3  -1   49.22    2.90 
  -8  -3  -1   45.85    3.42 
  -3   8  -1   42.09    3.34 
   8   3  -1   49.28    3.43 
  -8  -3  -1   43.56    2.94 
   3  -8  -1   44.85    3.36 
   8   3  -1   37.97    3.17 
  -8  -3  -1   43.28    2.92 
   8   3   1   43.41    3.03 
  -3   8   1   43.18    3.39 
  -8  -3   1   47.27    3.60 
  -3   8   1   49.40    3.51 
   3  -8   1   39.89    3.27 
  -3   8   1   48.24    3.88 
   3  -8   1   45.16    3.25 
  -3   8   1   40.91    3.50 
  -8  -3   1   41.21    3.57 
   3  -8   1   44.20    3.53 
   8   3   1   44.60    3.05 
   3  -8   1   43.81    3.63 
  -3   8   1   47.12    3.51 
   3  -8   1   48.73    3.55 
  -3   8   1   46.30    3.49 
   3  -8   1   40.22    3.20 
   8   3   1   45.97    3.19 
   3  -8   1   43.02    3.40 
  -8  -3   1   41.61    3.07 
   3  -8   1   44.58    3.13 
  -8  -3   1   43.25    3.07 
  -3   8   1   42.54    3.36 
  -8  -3   1   43.24    3.08 
   3  -8   1   43.64    3.24 
  -8  -2  -1   32.47    2.59 
  -8  -2  -1   32.91    2.59 
   2  -8  -1   30.77    2.63 
  -8  -2  -1   32.14    2.17 
  -8  -2  -1   31.62    2.17 
   8   2  -1   32.98    2.17 
   8   2  -1   37.61    2.53 
   2  -8  -1   35.01    2.64 
   2  -8  -1   35.41    2.64 
   2  -8  -1   32.82    2.88 
  -2   8  -1   35.61    2.76 
   8   2  -1   32.88    2.50 
  -2   8  -1   36.70    2.82 
  -2   8  -1   33.57    2.82 
   2  -8  -1   32.68    2.55 
   2  -8  -1   32.54    2.68 
  -2   8  -1   34.41    2.52 
  -2   8  -1   37.29    2.77 
  -2   8  -1   32.71    3.03 
   8   2  -1   36.72    2.39 
  -2   8  -1   31.25    2.74 
  -2   8  -1   34.64    2.75 
   2  -8  -1   30.64    2.80 
   2  -8  -1   37.16    2.65 
  -8  -2  -1   31.59    2.16 
   8   2  -1   34.56    2.18 
   8   2  -1   39.81    2.65 
   2  -8  -1   33.48    2.72 
   2  -8   1   37.28    2.64 
  -8  -2   1   33.86    2.34 
  -2   8   1   27.60    2.61 
  -2   8   1   31.58    2.49 
   2  -8   1   31.89    2.73 
   2  -8   1   33.96    2.73 
  -8  -2   1   33.63    2.38 
   2  -8   1   33.21    2.57 
   8   2   1   32.26    2.28 
   2  -8   1   29.87    2.82 
  -2   8   1   32.68    2.81 
   2  -8   1   33.31    2.85 
   2  -8   1   32.22    2.50 
   8   2   1   36.12    2.30 
  -2   8   1   33.80    2.77 
  -2   8   1   30.93    2.69 
  -8  -2   1   33.64    2.37 
  -8  -2   1   33.37    2.77 
   2  -8   1   30.37    2.55 
  -8  -2   1   36.30    2.79 
  -2   8   1   27.40    2.92 
   2  -8   1   31.46    2.61 
  -2   8   1   32.50    2.72 
   1  -8  -1   50.56    3.40 
  -1   8  -1   42.31    3.08 
  -1   8  -1   41.87    3.72 
  -1   8  -1   43.03    3.34 
   8   1  -1   45.16    3.01 
  -1   8  -1   43.54    3.33 
  -1   8  -1   41.21    3.41 
   1  -8  -1   40.34    3.14 
  -8  -1  -1   43.51    3.27 
   1  -8  -1   41.87    3.17 
   8   1  -1   40.94    2.76 
   1  -8  -1   42.27    3.19 
   1  -8  -1   47.05    3.27 
   8   1  -1   40.42    3.09 
   1  -8  -1   47.35    3.55 
   8   1  -1   43.91    2.75 
   1  -8  -1   48.29    3.62 
  -8  -1  -1   42.12    3.25 
   1  -8  -1   43.40    3.30 
   1  -8  -1   48.71    3.32 
   8   1  -1   47.30    3.15 
  -1   8  -1   39.87    3.36 
   1  -8  -1   48.07    3.41 
   8   1  -1   42.98    3.24 
  -1   8  -1   38.96    3.31 
  -1   8   1   44.16    3.38 
   8   1   1   46.56    2.90 
  -8  -1   1   42.51    3.44 
   8   1   1   41.69    2.87 
  -1   8   1   47.56    3.77 
  -1   8   1   40.58    3.07 
  -8  -1   1   44.09    3.00 
  -1   8   1   44.37    3.34 
  -8  -1   1   44.11    2.99 
  -1   8   1   40.59    3.38 
   1  -8   1   45.01    3.51 
   1  -8   1   39.86    3.18 
  -1   8   1   43.92    3.35 
   1  -8   1   44.54    3.33 
  -8  -1   1   44.96    3.46 
   1  -8   1   38.52    3.14 
   1  -8   1   42.46    3.20 
   1  -8   1   45.72    3.57 
  -1   8   1   44.12    3.43 
   1  -8   1   40.31    3.24 
  -8  -1   1   44.45    2.96 
   1  -8   1   49.37    3.46 
   1  -8   1   42.39    3.12 
   0   8  -1    0.66    0.55 
   0   8  -1    0.01    0.43 
   8   0  -1    0.35    0.29 
   0  -8  -1    0.54    0.52 
   0  -8  -1    0.24    0.45 
   0  -8  -1   -0.25    0.41 
   0  -8  -1    0.09    0.45 
   8   0  -1    0.84    0.40 
   0  -8  -1   -0.13    0.41 
   8   0  -1    1.42    0.46 
   0   8  -1    0.18    0.46 
  -8   0  -1    0.08    0.22 
  -8   0  -1    0.31    0.25 
   8   0  -1    0.42    0.25 
   8   0  -1    0.59    0.39 
   0  -8  -1    0.59    0.44 
   0  -8  -1    0.23    0.54 
   0  -8  -1   -0.04    0.41 
   8   0  -1    0.54    0.41 
   0  -8  -1    0.44    0.48 
   0   8  -1    0.02    0.42 
   8   0  -1    0.30    0.28 
   0   8  -1   -0.20    0.42 
  -8   0  -1    0.56    0.17 
   0   8  -1    0.10    0.46 
   0   8  -1   -0.07    0.44 
  -8   0  -1    0.37    0.27 
   0  -8  -1    0.39    0.48 
  -8   0  -1    0.56    0.17 
  -8   0   1    0.39    0.31 
   0   8   1    0.35    0.42 
   0  -8   1    0.65    0.55 
  -8   0   1    0.25    0.34 
   0   8   1   -0.06    0.45 
  -8   0   1   -0.03    0.25 
   0   8   1    1.23    0.55 
  -8   0   1    0.32    0.36 
   0   8   1    0.38    0.49 
   0   8   1   -0.35    0.40 
   0  -8   1    0.05    0.46 
   0   8   1    0.21    0.48 
   8   0   1    0.05    0.26 
   8   0   1    0.13    0.29 
   0   8   1    0.79    0.44 
   0  -8   1    0.53    0.51 
   0  -8   1   -0.24    0.45 
   0  -8   1    0.07    0.46 
   0  -8   1    0.24    0.49 
  -8   0   1   -0.03    0.25 
   0  -8   1    1.38    0.61 
   0  -8   1    0.20    0.44 
  -8   0   1    0.39    0.31 
   0  -8   1    0.88    0.57 
   8   0   1    0.13    0.23 
   8  -1  -1   50.90    3.27 
   8  -1  -1   45.03    3.14 
  -1  -8  -1   46.11    3.42 
   1   8  -1   45.05    3.49 
  -1  -8  -1   41.51    3.42 
  -1  -8  -1   45.59    3.65 
   1   8  -1   43.76    3.47 
  -8   1  -1   42.65    2.91 
   8  -1  -1   45.79    2.99 
   8  -1  -1   46.99    3.38 
  -8   1  -1   44.63    3.44 
  -1  -8  -1   49.68    3.39 
  -1  -8  -1   47.29    3.58 
  -8   1  -1   44.17    2.96 
   1   8  -1   43.31    3.17 
   1   8  -1   43.04    3.36 
  -8   1  -1   44.13    2.96 
   1   8  -1   47.70    3.67 
   8  -1  -1   47.54    2.94 
   1   8  -1   41.71    3.40 
   8  -1  -1   43.36    3.21 
   1   8  -1   37.92    3.73 
  -8   1  -1   42.64    2.91 
  -8   1  -1   44.28    3.42 
  -1  -8  -1   48.49    3.31 
  -1  -8  -1   43.53    3.29 
  -1  -8  -1   41.91    3.28 
   8  -1  -1   43.56    2.91 
   1   8  -1   41.70    3.37 
  -1  -8   1   44.32    3.40 
  -1  -8   1   46.88    3.25 
  -1  -8   1   42.55    3.39 
  -1  -8   1   43.82    3.29 
  -8   1   1   43.59    3.58 
  -8   1   1   47.29    3.60 
   1   8   1   43.11    3.42 
  -1  -8   1   48.66    3.35 
   1   8   1   39.65    3.33 
   1   8   1   43.26    3.79 
   8  -1   1   43.63    3.05 
  -8   1   1   47.90    3.08 
  -1  -8   1   45.90    3.58 
  -1  -8   1   46.74    3.34 
  -8   1   1   49.89    3.16 
   1   8   1   37.97    3.29 
   8  -1   1   47.43    3.21 
   8  -1   1   45.69    2.88 
  -8   1   1   49.87    3.15 
   1   8   1   45.47    3.48 
   1   8   1   47.02    3.19 
  -1  -8   1   48.71    3.65 
   8  -1   1   46.71    3.07 
  -8   1   1   47.93    3.08 
   1   8   1   46.24    3.64 
   8  -1   1   40.47    3.35 
  -8   1   1   47.64    3.62 
  -1  -8   1   40.73    3.40 
   1   8   1   43.71    3.39 
   2   8  -1   38.70    2.61 
  -2  -8  -1   34.56    2.73 
   2   8  -1   34.49    2.75 
   8  -2  -1   31.10    2.53 
   2   8  -1   29.01    2.98 
  -8   2  -1   33.53    2.35 
   8  -2  -1   34.29    2.40 
   8  -2  -1   32.77    2.48 
  -2  -8  -1   33.38    2.62 
  -8   2  -1   36.48    2.75 
   8  -2  -1   37.27    2.35 
  -2  -8  -1   30.80    2.76 
   8  -2  -1   35.40    2.23 
   2   8  -1   31.22    2.68 
   2   8  -1   30.97    2.72 
   2   8  -1   32.67    2.74 
  -2  -8  -1   34.27    2.64 
  -8   2  -1   32.76    2.30 
   8  -2  -1   35.17    2.75 
  -2  -8  -1   37.20    2.93 
   8  -2  -1   36.70    2.69 
  -2  -8  -1   36.02    2.87 
   8  -2  -1   33.38    2.31 
  -8   2  -1   33.81    2.69 
   2   8  -1   36.58    2.94 
  -8   2  -1   32.76    2.30 
   2   8  -1   32.95    2.69 
  -8   2  -1   33.54    2.35 
  -2  -8  -1   32.85    2.64 
  -8   2   1   32.79    2.48 
   2   8   1   32.08    2.67 
  -8   2   1   32.10    2.82 
  -2  -8   1   37.07    2.79 
  -2  -8   1   40.45    2.98 
   8  -2   1   33.27    2.27 
   2   8   1   33.60    2.69 
  -8   2   1   32.76    2.48 
   8  -2   1   33.06    2.68 
   2   8   1   36.44    2.80 
  -8   2   1   29.80    2.79 
   2   8   1   42.54    3.08 
   2   8   1   34.78    2.71 
   8  -2   1   30.27    2.41 
   2   8   1   28.81    2.64 
   8  -2   1   31.89    2.40 
  -2  -8   1   35.48    2.88 
  -8   2   1   35.67    2.42 
   8  -2   1   33.31    2.30 
   2   8   1   31.27    2.66 
  -2  -8   1   29.47    2.56 
   2   8   1   33.82    2.50 
  -8   2   1   35.66    2.42 
   8  -2   1   34.56    2.53 
  -2  -8   1   29.56    2.69 
  -2  -8   1   34.91    2.69 
  -2  -8   1   35.86    2.74 
   2   8   1   34.42    3.05 
  -3  -8  -1   42.56    3.53 
   8  -3  -1   43.67    3.27 
   3   8  -1   41.03    3.26 
   3   8  -1   44.17    3.73 
  -3  -8  -1   42.27    3.46 
  -3  -8  -1   43.95    3.43 
  -8   3  -1   44.77    3.06 
  -8   3  -1   44.82    3.07 
  -3  -8  -1   46.97    3.40 
   8  -3  -1   41.72    3.20 
   8  -3  -1   42.71    2.99 
  -8   3  -1   41.41    3.05 
   3   8  -1   47.10    3.40 
   3   8  -1   42.89    3.12 
   8  -3  -1   44.14    2.92 
  -8   3  -1   44.06    3.52 
   8  -3  -1   41.54    2.94 
   8  -3  -1   44.63    3.20 
  -8   3  -1   42.96    3.01 
  -8   3  -1   42.97    3.01 
   3   8  -1   42.12    3.42 
   3   8  -1   42.97    3.31 
   3   8  -1   47.69    3.37 
  -8   3  -1   42.62    3.49 
   8  -3  -1   52.55    3.45 
  -3  -8  -1   49.41    3.34 
   8  -3  -1   44.75    3.00 
   8  -3  -1   41.33    3.01 
   3   8  -1   38.37    3.48 
   3   8  -1   45.02    3.35 
   8  -3   1   45.05    2.85 
   3   8   1   37.02    3.23 
   3   8   1   42.89    3.52 
   3   8   1   49.39    3.17 
   3   8   1   43.99    3.31 
   8  -3   1   52.68    3.45 
   8  -3   1   42.11    3.27 
  -8   3   1   43.13    3.16 
  -3  -8   1   45.67    3.27 
  -3  -8   1   47.37    3.35 
  -3  -8   1   41.71    3.48 
  -8   3   1   43.06    3.17 
  -8   3   1   48.25    3.62 
  -8   3   1   42.80    3.08 
   3   8   1   39.43    3.23 
   8  -3   1   40.45    2.80 
   3   8   1   38.97    3.19 
  -8   3   1   42.77    3.08 
   3   8   1   46.40    3.43 
   3   8   1   42.54    3.29 
  -3  -8   1   45.28    3.56 
   3   8   1   48.54    3.80 
  -3  -8   1   38.44    3.31 
  -8   3   1   46.30    3.32 
  -8   3   1   44.60    3.65 
   8  -3   1   48.82    2.96 
   8  -3   1   45.85    3.08 
  -3  -8   1   47.20    3.40 
   8  -3   1   42.61    3.11 
  -3  -8   1   41.60    3.38 
   4   8  -1    2.32    0.74 
   8  -4  -1    2.04    0.61 
   4   8  -1    1.81    0.77 
   4   8  -1    2.07    0.62 
  -8   4  -1    1.97    0.61 
   8  -4  -1    1.34    0.47 
   4   8  -1    1.19    0.57 
   8  -4  -1    1.07    0.69 
  -8   4  -1    0.80    0.54 
  -4  -8  -1    2.95    0.76 
  -8   4  -1    1.75    0.55 
   8  -4  -1    1.79    0.64 
  -8   4  -1    1.84    0.48 
   8  -4  -1    1.37    0.55 
   4   8  -1    1.43    0.63 
   4   8  -1    2.02    0.67 
   8  -4  -1    2.11    0.59 
   8  -4  -1    2.30    0.60 
   4   8  -1    3.11    0.92 
   4   8  -1    1.75    0.68 
  -4  -8  -1    1.88    0.77 
   8  -4  -1    1.60    0.48 
   8  -4  -1    1.43    0.53 
  -8   4  -1    1.84    0.48 
  -8   4   1    1.90    0.54 
   8  -4   1    2.18    0.40 
  -4  -8   1    2.50    0.73 
   4   8   1    2.29    0.70 
   8  -4   1    1.74    0.52 
  -8   4   1    1.89    0.66 
   8  -4   1    1.53    0.46 
  -8   4   1    1.90    0.54 
   8  -4   1    2.26    0.49 
   4   8   1    1.25    0.57 
  -4  -8   1    2.03    0.77 
  -8   4   1    2.32    0.60 
   8  -4   1    1.62    0.49 
   4   8   1    1.26    0.59 
   8  -4   1    1.34    0.51 
   4   8   1    2.37    0.64 
   4   8   1    2.19    0.77 
   8  -4   1    2.37    0.87 
   4   8   1    0.33    0.49 
  -8   4   1    1.17    0.61 
  -8   4   1    2.66    0.64 
  -8   4   1    2.65    0.64 
  -8   4   1    1.08    0.58 
   4   8   1    1.40    0.71 
   8  -4   1    2.18    0.59 
  -4  -8   1    1.69    0.70 
   4   8   1    1.66    0.63 
   5   8  -1   18.51    1.89 
   5   8  -1   19.24    1.86 
   5   8  -1   20.52    1.97 
  -5  -8  -1   20.11    1.91 
   8  -5  -1   20.38    1.70 
   8  -5  -1   21.18    2.01 
   8  -5  -1   20.06    1.94 
  -8   5  -1   17.99    1.91 
  -5  -8  -1   20.24    2.05 
   8  -5  -1   20.15    1.88 
   8  -5  -1   18.94    1.86 
   8  -5  -1   17.93    1.75 
   5   8  -1   18.27    2.16 
   5   8  -1   17.97    1.83 
   8  -5  -1   19.08    1.72 
   5   8  -1   24.33    1.98 
  -8   5  -1   21.55    2.09 
   8  -5  -1   20.67    1.66 
   5   8  -1   21.49    2.14 
  -8   5  -1   21.52    1.84 
   5   8   1   21.30    2.16 
   8  -5   1   21.39    1.82 
   8  -5   1   18.71    1.55 
   5   8   1   18.79    1.80 
   8  -5   1   21.35    1.90 
   8  -5   1   20.43    1.61 
   5   8   1   19.00    1.76 
  -5  -8   1   19.98    1.93 
  -5  -8   1   22.14    1.97 
  -8   5   1   21.08    1.99 
   8  -5   1   23.63    1.79 
   5   8   1   20.12    2.05 
   8  -5   1   21.12    2.03 
   8  -5   1   20.89    1.66 
   5   8   1   20.72    1.83 
   5   8   1   19.40    1.84 
  -8   5   1   20.18    1.84 
   5   8   1   16.57    1.84 
   5   8   1   20.87    1.92 
   8  -5   1   24.17    1.73 
  -6  -8  -1   33.54    2.77 
   6   8  -1   36.00    3.01 
   6   8  -1   38.10    2.77 
   8  -6  -1   32.59    2.54 
   8  -6  -1   34.43    2.83 
  -8   6  -1   37.49    2.94 
   6   8  -1   37.61    2.73 
   8  -6  -1   34.95    2.96 
  -8   6  -1   31.74    2.65 
   6   8  -1   34.17    3.07 
   6   8  -1   33.52    2.78 
  -6  -8  -1   33.19    2.83 
   6   8  -1   34.22    2.65 
   8  -6  -1   32.92    2.64 
   8  -6  -1   35.97    2.90 
   8  -6  -1   34.33    2.83 
   8  -6  -1   32.43    2.62 
   6   8  -1   28.90    2.71 
   8  -6  -1   30.28    2.53 
   8  -6   1   30.99    2.53 
   6   8   1   35.37    2.92 
   8  -6   1   34.48    2.47 
   6   8   1   29.36    2.54 
   8  -6   1   32.65    2.71 
  -6  -8   1   33.43    2.74 
   6   8   1   32.13    2.54 
   6   8   1   28.99    2.96 
  -6  -8   1   34.68    2.81 
   8  -6   1   33.60    2.57 
   6   8   1   35.12    2.75 
   8  -6   1   29.04    2.42 
   6   8   1   33.19    2.69 
  -8   6   1   35.75    2.97 
   6   8   1   35.14    2.65 
   6   8   1   38.15    2.65 
   8  -6   1   33.20    2.84 
   8  -6   1   36.43    2.98 
   7   8  -1   10.63    1.27 
   7   8  -1   11.25    1.56 
   7   8  -1   10.92    1.51 
   8  -7  -1    9.22    1.37 
  -8   7  -1    8.48    1.44 
   8  -7  -1   11.02    1.48 
   8  -7  -1    9.21    1.31 
   7   8  -1    8.96    1.15 
  -7  -8  -1    8.93    1.26 
   7   8  -1    9.34    1.35 
   7   8  -1    9.70    1.27 
   8  -7  -1    9.91    1.31 
   8  -7  -1   10.70    1.44 
   8  -7  -1   11.62    1.25 
   7   8  -1   11.11    1.34 
   8  -7  -1    9.91    1.20 
  -7  -8  -1   11.26    1.44 
   7   8   1   10.13    1.11 
   7   8   1   10.00    1.43 
   8  -7   1   10.51    1.16 
   8  -7   1    9.73    1.32 
   7   8   1    8.51    1.07 
  -7  -8   1    8.49    1.30 
   7   8   1    8.30    1.23 
   8  -7   1    9.79    1.25 
  -8   7   1   10.94    1.54 
   8  -7   1    7.06    1.17 
   7   8   1    9.50    1.20 
   8  -7   1    9.80    1.38 
   7   8   1    9.25    1.44 
   8  -7   1   11.12    1.15 
   7   8   1    8.55    1.12 
   8   8  -1    0.07    0.49 
   8   8  -1    0.19    0.57 
   8   8  -1    0.27    0.60 
  -8   8  -1    0.08    0.70 
   8  -8  -1   -0.05    0.60 
   8  -8  -1    0.20    0.59 
   8   8  -1   -0.26    0.45 
   8  -8  -1   -0.63    0.57 
   8  -8  -1    0.37    0.58 
   8  -8  -1    0.29    0.66 
   8   8  -1   -0.17    0.54 
   8  -8  -1   -0.30    0.65 
   8   8  -1   -0.77    0.55 
   8   8  -1   -0.19    0.48 
   8  -8  -1    0.04    0.54 
   8   8   1    0.33    0.49 
  -8   8   1   -0.91    0.53 
   8   8   1   -0.04    0.51 
   8  -8   1   -0.63    0.60 
   8   8   1    0.40    0.55 
   8  -8   1   -0.15    0.56 
   8   8   1    0.06    0.46 
   8  -8   1    0.43    0.54 
   8   8   1    0.37    0.58 
   8  -8   1    0.20    0.53 
   8   8   1    0.64    0.66 
  -8  -8   1   -0.98    0.47 
   8  -8   1    0.08    0.57 
   8  -8   1    0.98    0.68 
   8  -9  -1   30.68    2.75 
   9   8  -1   32.22    2.49 
   8  -9  -1   35.68    2.73 
   9   8  -1   31.92    3.05 
   9   8  -1   31.66    2.44 
   8  -9  -1   33.36    3.02 
  -8   9  -1   27.78    3.04 
   8  -9  -1   29.46    2.77 
   9   8  -1   32.70    2.86 
   8  -9  -1   31.07    2.66 
   9   8  -1   30.23    2.68 
   8  -9   1   34.55    2.68 
   9   8   1   32.93    2.64 
   8  -9   1   35.54    2.64 
   9   8   1   30.47    2.22 
   9   8   1   28.33    2.19 
   8  -9   1   32.50    2.72 
  -8   9   1   33.26    3.12 
   8  -9   1   34.24    2.79 
   9   8   1   29.05    2.72 
   7  -9  -1    7.61    1.33 
   9   7  -1    6.19    1.08 
  -7   9  -1    7.01    1.44 
   7  -9  -1    6.21    1.10 
   7  -9  -1    5.53    1.29 
   9   7  -1    6.30    1.18 
   7  -9  -1    4.71    1.23 
   7  -9  -1    8.39    1.24 
  -9  -7  -1    7.46    1.08 
   9   7  -1    6.18    0.89 
   9   7  -1    5.44    1.10 
   9   7  -1    5.90    0.86 
  -9  -7  -1    7.46    1.07 
   7  -9   1    6.67    1.10 
  -7   9   1    7.33    1.45 
   7  -9   1    5.52    1.15 
   9   7   1    7.45    1.03 
   9   7   1    5.90    0.60 
   7  -9   1    6.00    1.16 
   7  -9   1    7.55    1.35 
   7  -9   1    5.67    1.23 
   7  -9   1    7.06    1.13 
   9   7   1    5.57    1.01 
   6  -9  -1    1.73    0.80 
  -9  -6  -1    0.12    0.41 
   9   6  -1   -0.17    0.51 
  -9  -6  -1    0.36    0.50 
   6  -9  -1   -1.20    0.46 
   6  -9  -1    0.41    0.69 
   9   6  -1    0.61    0.43 
  -6   9  -1   -0.29    0.63 
   9   6  -1    1.06    0.59 
   6  -9  -1    1.30    0.69 
   9   6  -1    0.69    0.42 
   6  -9  -1    0.58    0.62 
  -9  -6  -1    0.12    0.41 
   9   6  -1    0.29    0.53 
   6  -9  -1    0.26    0.56 
   9   6   1    0.54    0.47 
  -6   9   1    0.41    0.76 
   6  -9   1    2.38    0.76 
   6  -9   1   -0.34    0.54 
   9   6   1    0.23    0.49 
   6  -9   1    0.71    0.62 
  -9  -6   1    0.66    0.51 
   6  -9   1   -0.21    0.64 
   6  -9   1   -0.88    0.56 
   6  -9   1    0.25    0.62 
   6  -9   1    0.45    0.58 
   6  -9   1    2.33    0.84 
  -9  -6   1    0.66    0.51 
   9   5  -1    6.73    0.69 
   5  -9  -1    4.42    1.01 
   9   5  -1    4.75    0.90 
   5  -9  -1    5.57    1.16 
   9   5  -1    5.68    0.64 
   5  -9  -1    6.62    1.27 
   9   5  -1    4.88    0.93 
   5  -9  -1    2.60    0.87 
   5  -9  -1    6.40    1.00 
  -5   9  -1    4.64    1.12 
   5  -9  -1    6.30    1.21 
   9   5  -1    3.15    0.77 
  -9  -5  -1    4.69    0.74 
  -5   9  -1    4.73    1.20 
  -9  -5  -1    5.59    0.80 
   5  -9  -1    4.04    1.03 
  -9  -5  -1    4.68    0.74 
   5  -9   1    5.23    1.00 
  -5   9   1    4.43    1.15 
   5  -9   1    4.69    1.07 
   5  -9   1    4.91    1.04 
  -9  -5   1    6.19    0.90 
   5  -9   1    3.34    0.91 
  -9  -5   1    4.65    0.80 
   5  -9   1    6.77    1.19 
  -5   9   1    3.41    1.08 
   5  -9   1    8.09    1.27 
  -9  -5   1    4.65    0.81 
   5  -9   1    5.98    1.19 
   9   5   1    5.09    0.75 
  -4   9  -1   35.15    2.89 
  -9  -4  -1   35.07    2.28 
   4  -9  -1   29.69    2.68 
  -4   9  -1   31.75    2.77 
   9   4  -1   29.44    2.03 
   9   4  -1   27.79    2.28 
   9   4  -1   35.12    2.65 
  -9  -4  -1   28.06    2.24 
   4  -9  -1   29.10    2.57 
  -4   9  -1   30.17    3.00 
   4  -9  -1   33.84    2.68 
  -9  -4  -1   35.12    2.29 
   9   4  -1   30.98    2.04 
   4  -9  -1   30.24    2.84 
   4  -9  -1   30.92    2.84 
  -4   9  -1   32.96    2.79 
   4  -9  -1   30.85    2.59 
   4  -9  -1   29.44    2.67 
   4  -9  -1   27.22    2.52 
  -4   9  -1   26.53    2.77 
   4  -9  -1   29.95    2.33 
   9   4  -1   31.55    2.47 
  -4   9   1   33.98    3.14 
   4  -9   1   35.19    2.59 
  -9  -4   1   30.73    2.36 
   4  -9   1   33.33    2.91 
   9   4   1   31.92    2.29 
   4  -9   1   32.26    2.83 
   4  -9   1   31.49    2.77 
   4  -9   1   24.54    2.45 
   4  -9   1   31.57    2.19 
   4  -9   1   31.40    2.58 
  -4   9   1   28.23    2.60 
   4  -9   1   32.71    2.59 
  -9  -4   1   31.65    2.39 
  -4   9   1   30.92    2.72 
   9   4   1   30.01    2.26 
  -9  -4   1   30.70    2.35 
  -4   9   1   31.96    2.77 
  -4   9   1   27.44    2.77 
   4  -9   1   27.14    2.63 
  -3   9  -1   -0.05    0.70 
   3  -9  -1    0.30    0.58 
   3  -9  -1   -0.46    0.40 
   9   3  -1    0.15    0.45 
  -3   9  -1    0.48    0.63 
   3  -9  -1    1.32    0.72 
   3  -9  -1    0.84    0.65 
   9   3  -1   -0.15    0.41 
  -9  -3  -1    0.59    0.30 
   3  -9  -1    1.02    0.58 
   3  -9  -1    0.52    0.60 
  -9  -3  -1    0.59    0.30 
  -3   9  -1    0.56    0.59 
   3  -9  -1    1.81    0.79 
   3  -9  -1    1.06    0.57 
   3  -9  -1    0.42    0.54 
  -9  -3  -1    0.45    0.31 
  -3   9  -1    0.75    0.59 
  -3   9  -1    0.34    0.65 
   9   3  -1    0.52    0.46 
  -3   9  -1    0.29    0.67 
   3  -9   1    1.33    0.71 
  -9  -3   1    0.75    0.42 
  -3   9   1    0.99    0.72 
   9   3   1    0.75    0.34 
  -9  -3   1    0.95    0.44 
  -3   9   1    0.84    0.66 
  -3   9   1    0.73    0.62 
  -9  -3   1    0.75    0.42 
   3  -9   1    0.40    0.65 
  -3   9   1    1.12    0.69 
   3  -9   1    0.10    0.52 
   3  -9   1    0.73    0.60 
  -3   9   1    0.92    0.60 
   3  -9   1   -0.14    0.50 
   9   3   1    1.29    0.35 
   3  -9   1    0.55    0.74 
  -3   9   1    0.69    0.64 
   3  -9   1    1.55    0.53 
   3  -9   1    0.32    0.54 
   3  -9   1    0.46    0.54 
  -9  -2  -1   30.14    2.05 
   9   2  -1   35.69    2.38 
  -2   9  -1   33.34    2.67 
  -2   9  -1   34.25    3.04 
   2  -9  -1   34.59    2.59 
   2  -9  -1   34.76    2.59 
   2  -9  -1   31.28    2.65 
  -2   9  -1   31.18    2.69 
  -9  -2  -1   25.86    2.01 
   2  -9  -1   29.08    2.40 
   2  -9  -1   29.33    2.52 
   9   2  -1   31.74    2.22 
   2  -9  -1   30.63    2.50 
  -9  -2  -1   30.14    2.05 
  -2   9  -1   34.66    2.72 
   9   2  -1   26.11    2.28 
   9   2  -1   28.97    2.39 
  -2   9  -1   27.46    2.66 
   2  -9  -1   29.87    2.76 
   2  -9  -1   24.92    2.63 
  -2   9  -1   34.42    2.79 
   2  -9  -1   29.80    2.54 
  -2   9  -1   27.13    2.37 
  -2   9   1   29.04    2.68 
  -9  -2   1   30.24    2.24 
  -2   9   1   27.40    2.61 
   2  -9   1   28.18    2.34 
   2  -9   1   31.30    2.66 
  -2   9   1   28.16    2.62 
   2  -9   1   26.42    2.70 
   2  -9   1   31.31    2.78 
   2  -9   1   30.22    2.47 
  -2   9   1   30.39    2.63 
  -2   9   1   29.55    2.62 
   2  -9   1   30.28    2.59 
   2  -9   1   31.46    2.50 
   2  -9   1   31.60    2.54 
   9   2   1   33.37    2.06 
  -9  -2   1   28.20    2.56 
  -9  -2   1   29.24    2.18 
  -9  -2   1   30.20    2.23 
   2  -9   1   29.52    2.49 
  -2   9   1   31.65    2.97 
  -2   9   1   29.72    2.39 
  -9  -1  -1   61.07    4.11 
  -1   9  -1   64.50    5.29 
  -1   9  -1   56.46    4.78 
   1  -9  -1   71.95    4.64 
   1  -9  -1   65.25    4.60 
   1  -9  -1   62.79    4.68 
  -9  -1  -1   61.12    4.11 
  -1   9  -1   58.45    4.61 
   9   1  -1   63.58    4.46 
   1  -9  -1   61.18    4.67 
   1  -9  -1   63.31    4.69 
   1  -9  -1   62.78    4.55 
  -1   9  -1   68.10    4.77 
  -1   9  -1   65.55    4.42 
   9   1  -1   67.82    4.44 
   9   1  -1   73.22    4.71 
   1  -9  -1   65.86    4.50 
  -9  -1  -1   64.62    4.14 
  -9  -1  -1   64.52    4.13 
   1  -9  -1   71.00    5.01 
  -1   9  -1   68.96    4.81 
   9   1  -1   64.40    4.13 
  -1   9  -1   68.02    4.89 
   1  -9  -1   71.63    4.85 
   1  -9  -1   58.82    5.00 
   1  -9   1   62.60    4.67 
  -1   9   1   59.12    4.78 
   1  -9   1   64.66    5.07 
   1  -9   1   60.81    4.51 
   1  -9   1   70.30    4.61 
   1  -9   1   59.10    4.66 
   1  -9   1   78.64    5.10 
  -9  -1   1   63.76    4.34 
   1  -9   1   70.89    4.86 
  -1   9   1   61.50    4.81 
  -1   9   1   62.89    4.69 
  -1   9   1   68.15    5.30 
  -9  -1   1   63.72    4.35 
  -1   9   1   58.84    4.63 
   1  -9   1   67.82    4.61 
  -1   9   1   67.56    4.42 
  -9  -1   1   62.83    4.29 
  -1   9   1   67.79    4.77 
  -9  -1   1   61.64    4.95 
   1  -9   1   67.15    4.49 
   0  -9  -1    0.96    0.67 
   0  -9  -1    1.03    0.54 
   0  -9  -1    2.00    0.76 
   9   0  -1    1.77    0.49 
  -9   0  -1    0.61    0.27 
   9   0  -1    2.25    0.54 
   0  -9  -1    0.50    0.56 
   9   0  -1    2.79    0.53 
   0  -9  -1    0.57    0.60 
  -9   0  -1    1.21    0.27 
   0  -9  -1    1.79    0.66 
   0   9  -1    2.30    0.77 
   0   9  -1    1.34    0.60 
   0   9  -1    0.56    0.56 
   0  -9  -1    2.11    0.68 
   0   9  -1    0.57    0.56 
   0   9  -1    1.07    0.57 
   0  -9  -1    1.14    0.66 
   0  -9  -1    1.97    0.81 
  -9   0  -1    0.61    0.27 
  -9   0  -1    1.21    0.27 
   0  -9  -1    1.24    0.58 
   9   0  -1    3.13    0.57 
   0   9  -1    2.36    0.91 
   0   9  -1    1.20    0.71 
   0   9   1    0.25    0.49 
  -9   0   1    1.23    0.47 
   0   9   1    1.31    0.59 
   0  -9   1    0.89    0.60 
   0  -9   1    2.11    0.73 
   9   0   1    0.23    0.71 
   0   9   1    2.94    0.88 
   0  -9   1    0.73    0.58 
   9   0   1    0.74    0.30 
   0  -9   1    2.58    0.80 
  -9   0   1    1.13    0.41 
   9   0   1    0.86    0.37 
   0   9   1    1.38    0.69 
   0   9   1    1.01    0.72 
   0  -9   1    1.58    0.71 
   9   0   1    0.86    0.27 
   0   9   1    1.93    0.77 
  -9   0   1    0.95    0.39 
   0  -9   1    1.10    0.66 
  -9   0   1    1.13    0.41 
   0   9   1    0.97    0.65 
   0  -9   1    0.71    0.55 
   0  -9   1    2.25    0.76 
   0  -9   1    0.67    0.55 
  -1  -9  -1   55.74    4.64 
   1   9  -1   65.46    4.67 
   9  -1  -1   58.45    4.32 
  -9   1  -1   61.01    4.16 
   1   9  -1   70.98    4.78 
   1   9  -1   59.46    4.76 
  -1  -9  -1   74.15    4.73 
  -9   1  -1   55.40    4.19 
  -1  -9  -1   67.08    4.73 
  -9   1  -1   55.34    4.19 
  -1  -9  -1   75.04    4.65 
  -1  -9  -1   64.73    4.92 
   1   9  -1   57.85    4.75 
   9  -1  -1   66.97    4.69 
   9  -1  -1   67.39    4.71 
  -1  -9  -1   70.83    4.62 
   9  -1  -1   65.65    4.16 
  -1  -9  -1   74.06    5.14 
   1   9  -1   67.06    4.67 
  -9   1  -1   61.09    4.15 
   1   9  -1   72.89    4.48 
  -1  -9  -1   66.71    4.54 
   9  -1  -1   63.25    4.00 
   1   9  -1   72.41    5.41 
   9  -1  -1   63.26    4.45 
  -1  -9  -1   65.54    4.93 
   9  -1  -1   60.66    3.98 
   9  -1   1   61.31    4.66 
  -1  -9   1   73.42    4.63 
  -1  -9   1   59.34    4.72 
   1   9   1   63.20    4.63 
  -1  -9   1   59.81    4.56 
   1   9   1   62.99    5.22 
   9  -1   1   68.51    4.04 
  -9   1   1   70.62    4.40 
   1   9   1   64.88    4.65 
  -9   1   1   67.37    4.32 
  -1  -9   1   62.54    4.70 
   9  -1   1   64.01    4.27 
  -1  -9   1   63.89    5.03 
  -1  -9   1   68.35    4.72 
   1   9   1   66.19    4.70 
  -9   1   1   70.71    4.41 
  -9   1   1   60.25    4.92 
  -1  -9   1   61.21    4.90 
   9  -1   1   63.19    4.27 
   1   9   1   60.98    4.78 
   1   9   1   67.57    4.42 
  -9   1   1   67.41    4.33 
   1   9   1   68.58    4.80 
  -2  -9  -1   27.99    2.52 
   9  -2  -1   29.95    2.59 
   2   9  -1   26.69    2.33 
  -9   2  -1   30.19    2.12 
  -2  -9  -1   26.76    2.45 
   2   9  -1   31.83    2.61 
   2   9  -1   30.21    2.58 
  -2  -9  -1   31.70    2.74 
  -2  -9  -1   29.45    2.46 
   9  -2  -1   33.19    2.47 
   9  -2  -1   27.70    2.20 
   9  -2  -1   33.94    2.27 
   2   9  -1   25.52    2.51 
   9  -2  -1   31.04    2.07 
   9  -2  -1   28.55    2.04 
  -9   2  -1   29.48    2.16 
   2   9  -1   22.53    2.43 
  -9   2  -1   29.50    2.16 
   9  -2  -1   29.99    2.35 
  -2  -9  -1   30.02    2.64 
  -2  -9  -1   30.10    2.72 
  -9   2  -1   30.18    2.12 
   2   9  -1   31.39    2.66 
   2   9  -1   31.41    2.97 
  -2  -9   1   32.20    2.60 
  -2  -9   1   29.61    2.48 
  -9   2   1   28.15    2.27 
   2   9   1   32.56    2.61 
   2   9   1   26.93    2.48 
   2   9   1   30.98    2.40 
  -9   2   1   28.14    2.28 
   2   9   1   36.33    2.72 
   9  -2   1   30.78    2.23 
   2   9   1   30.53    2.92 
   2   9   1   31.86    2.55 
   2   9   1   26.04    2.51 
   9  -2   1   30.71    2.62 
  -2  -9   1   31.33    2.58 
  -9   2   1   30.18    2.23 
  -2  -9   1   28.39    2.68 
   9  -2   1   28.59    2.07 
  -2  -9   1   30.49    2.48 
  -9   2   1   28.65    2.60 
  -9   2   1   30.16    2.24 
   2   9   1   33.57    2.89 
  -2  -9   1   30.35    2.73 
   9  -2   1   28.46    2.20 
  -2  -9   1   29.71    2.60 
  -9   3  -1    0.49    0.40 
   3   9  -1    0.89    0.55 
   9  -3  -1    0.54    0.68 
   3   9  -1    1.33    0.64 
  -9   3  -1    0.45    0.37 
   9  -3  -1    1.45    0.49 
   9  -3  -1    1.53    0.60 
   3   9  -1    0.52    0.61 
  -9   3  -1    0.49    0.40 
  -3  -9  -1    1.47    0.70 
   9  -3  -1    0.96    0.50 
   9  -3  -1    1.37    0.59 
   3   9  -1    2.11    0.67 
   3   9  -1    0.62    0.65 
   3   9  -1    0.86    0.63 
   3   9  -1   -0.10    0.48 
  -3  -9  -1    1.20    0.75 
   9  -3  -1    0.63    0.41 
  -9   3  -1    0.45    0.37 
   3   9  -1    0.95    0.78 
   9  -3  -1    1.19    0.44 
  -9   3  -1    0.88    0.43 
  -3  -9   1    0.32    0.53 
  -3  -9   1    0.63    0.64 
  -9   3   1    0.37    0.41 
   3   9   1    0.44    0.68 
  -3  -9   1   -0.14    0.54 
   3   9   1    0.54    0.67 
  -3  -9   1    0.70    0.54 
  -9   3   1    0.99    0.55 
  -9   3   1    1.79    0.57 
   9  -3   1    0.64    0.42 
   3   9   1    1.25    0.61 
  -3  -9   1    0.58    0.67 
   3   9   1    1.08    0.57 
   3   9   1    0.66    0.55 
   9  -3   1    0.87    0.73 
   9  -3   1    0.81    0.44 
  -9   3   1    0.37    0.41 
  -9   3   1    1.80    0.57 
   3   9   1    0.73    0.57 
   3   9   1    0.64    0.64 
  -3  -9   1    0.22    0.57 
   3   9   1   -0.12    0.52 
  -3  -9   1   -0.43    0.50 
   3   9   1    0.87    0.56 
   9  -3   1    1.64    0.51 
  -9   4  -1   30.03    2.35 
   9  -4  -1   33.58    2.66 
   9  -4  -1   27.70    2.35 
   4   9  -1   27.09    2.55 
   4   9  -1   31.40    2.66 
   9  -4  -1   24.96    2.57 
  -9   4  -1   30.04    2.35 
  -4  -9  -1   33.23    2.78 
  -4  -9  -1   32.93    2.71 
   4   9  -1   31.08    2.90 
   9  -4  -1   28.17    2.48 
   4   9  -1   33.79    3.11 
   9  -4  -1   33.17    2.22 
   4   9  -1   34.22    2.73 
   9  -4  -1   36.75    2.38 
  -9   4  -1   31.58    2.42 
   9  -4  -1   29.77    2.30 
   9  -4  -1   34.93    2.53 
   4   9  -1   30.40    2.71 
   4   9  -1   30.96    2.70 
   4   9   1   29.92    2.62 
   4   9   1   29.73    2.66 
   4   9   1   30.13    2.64 
   9  -4   1   30.67    2.76 
  -9   4   1   28.18    2.45 
   9  -4   1   28.86    2.13 
   9  -4   1   28.15    2.41 
   9  -4   1   32.68    2.32 
   9  -4   1   32.03    2.54 
   9  -4   1   30.44    2.33 
  -4  -9   1   34.24    2.77 
   4   9   1   30.35    2.83 
  -4  -9   1   36.17    2.76 
  -4  -9   1   32.74    2.70 
   4   9   1   31.03    2.62 
   4   9   1   34.16    3.07 
   4   9   1   30.57    2.45 
   9  -4   1   28.85    2.11 
   4   9   1   31.78    2.60 
  -5  -9  -1    5.35    1.06 
   5   9  -1    4.77    1.19 
   5   9  -1    4.69    1.02 
   9  -5  -1    5.24    0.93 
   5   9  -1    3.99    1.15 
   9  -5  -1    4.31    0.75 
   5   9  -1    4.24    0.99 
   5   9  -1    4.83    1.01 
   9  -5  -1    6.62    0.80 
   9  -5  -1    5.29    0.98 
  -9   5  -1    6.55    0.97 
   9  -5  -1    3.78    0.80 
   5   9  -1    3.25    0.96 
   9  -5  -1    6.15    0.90 
   9  -5  -1    5.77    0.92 
   9  -5  -1    5.47    0.99 
   9  -5  -1    4.20    1.12 
   5   9  -1    3.44    0.97 
  -5  -9  -1    5.02    1.10 
   5   9   1    5.69    1.23 
   5   9   1    4.65    0.96 
   5   9   1    5.02    0.95 
   5   9   1    4.81    1.05 
   5   9   1    3.91    0.96 
   9  -5   1    4.72    0.84 
  -5  -9   1    5.25    1.07 
   5   9   1    5.06    1.03 
  -9   5   1    4.13    1.05 
  -5  -9   1    5.50    1.12 
   9  -5   1    5.00    1.18 
   9  -5   1    4.85    0.79 
   5   9   1    4.66    0.97 
   9  -5   1    6.00    0.94 
  -5  -9   1    6.34    1.15 
   9  -5   1    3.89    0.69 
   9  -5   1    5.50    0.90 
   9  -5   1    3.77    0.68 
   5   9   1    4.81    1.16 
  -9   5   1    3.67    0.87 
  -6  -9  -1    0.04    0.68 
   9  -6  -1    0.85    0.60 
   9  -6  -1    2.00    0.75 
  -6  -9  -1    1.91    0.71 
   9  -6  -1    0.34    0.48 
   9  -6  -1    0.24    0.58 
   9  -6  -1    0.55    0.91 
   9  -6  -1    0.46    0.53 
   6   9  -1   -0.64    0.53 
   6   9  -1   -0.51    0.51 
   6   9  -1    1.31    0.83 
   9  -6  -1    0.32    0.47 
   6   9  -1    0.90    0.64 
   6   9  -1    0.34    0.58 
   6   9  -1   -0.26    0.68 
   9  -6  -1    0.87    0.59 
   6   9  -1    0.77    0.63 
   6   9   1    0.37    0.55 
   6   9   1   -0.03    0.45 
   9  -6   1   -0.26    0.47 
  -6  -9   1    0.10    0.67 
  -6  -9   1    0.78    0.69 
   9  -6   1    1.03    0.65 
   9  -6   1    0.53    0.41 
   6   9   1   -0.54    0.49 
   6   9   1    0.57    0.65 
   6   9   1    0.79    0.73 
   6   9   1    0.73    0.59 
   6   9   1   -0.37    0.47 
  -9   6   1    0.74    0.73 
   9  -6   1    1.24    0.95 
   9  -6   1    1.07    0.53 
   9  -6   1   -0.10    0.52 
   9  -6   1    1.79    0.63 
   9  -6   1    0.89    0.58 
   6   9   1    0.53    0.58 
  -7  -9  -1    4.67    1.15 
   7   9  -1    5.83    1.29 
   7   9  -1    5.49    1.07 
   7   9  -1    5.42    1.32 
   7   9  -1    5.23    1.03 
   7   9  -1    5.38    1.07 
   9  -7  -1    5.49    1.14 
   9  -7  -1    4.36    1.05 
   9  -7  -1    6.84    1.02 
  -7  -9  -1    8.05    1.25 
   9  -7  -1    5.45    0.91 
   9  -7  -1    6.08    1.20 
   7   9  -1    7.49    1.29 
   7   9  -1    4.94    1.06 
   9  -7  -1    5.87    1.14 
  -9   7  -1    6.53    1.29 
   9  -7  -1    5.31    1.01 
   7   9   1    4.43    0.93 
   9  -7   1    7.89    1.14 
   7   9   1    4.08    1.03 
   9  -7   1    7.72    1.21 
  -9   7   1    5.96    1.29 
   9  -7   1    6.24    0.86 
   9  -7   1    6.24    1.00 
   7   9   1    5.84    0.94 
   7   9   1    6.06    1.08 
   7   9   1    7.06    1.36 
   7   9   1    5.40    1.21 
   9  -7   1    6.15    1.14 
   7   9   1    6.79    0.99 
   9  -7   1    4.65    1.04 
  -7  -9   1    6.68    1.20 
   9  -7   1    5.58    0.90 
   8   9  -1   31.89    2.56 
   9  -8  -1   29.29    2.58 
   9  -8  -1   32.12    2.97 
   9  -8  -1   36.96    3.18 
   8   9  -1   30.74    2.60 
   9  -8  -1   36.68    2.87 
   8   9  -1   36.83    3.12 
   8   9  -1   39.17    3.38 
   8   9  -1   34.53    2.89 
   8   9  -1   33.22    2.85 
  -9   8  -1   28.67    3.00 
   9  -8  -1   33.98    3.01 
   8   9  -1   33.15    2.69 
   9  -8  -1   30.90    2.66 
   9  -8  -1   32.19    2.73 
  -9   8   1   33.28    3.14 
   9  -8   1   32.20    2.56 
  -8  -9   1   30.72    2.87 
   9  -8   1   31.76    2.88 
   8   9   1   34.12    2.57 
   8   9   1   35.24    3.17 
   9  -8   1   33.18    2.56 
   8   9   1   35.46    3.01 
   9  -8   1   34.17    3.05 
   9  -8   1   30.79    2.65 
   8   9   1   28.63    2.71 
   8   9   1   30.51    2.37 
   8   9   1   34.24    2.79 
   9  -8   1   31.40    2.73 
   9  -8   1   34.68    2.95 
   9  -9  -1   -0.53    0.76 
   9   9  -1    0.21    0.51 
   9   9  -1    0.65    0.68 
   9  -9  -1   -0.14    0.64 
   9  -9  -1    1.60    0.84 
  -9   9  -1   -0.51    0.80 
   9  -9  -1   -0.03    0.59 
   9   9  -1    0.71    0.69 
   9  -9  -1    0.00    0.65 
   9  -9   1    1.17    0.67 
  -9   9   1   -0.07    0.83 
   9  -9   1   -0.26    0.66 
   9   9   1    0.21    0.45 
   9  -9   1    0.35    0.71 
   9  -9   1    0.88    0.75 
   9  -9   1   -0.03    0.61 
   9   9   1   -0.33    0.56 
   9   9   1    0.68    0.71 
   9   9   1   -0.15    0.40 
   9 -10  -1    5.53    1.16 
   9 -10  -1    5.06    1.14 
  10   9  -1    3.49    0.65 
   9 -10  -1    5.04    1.20 
   9 -10  -1    4.81    1.27 
  -9  10  -1    6.18    1.54 
  10   9  -1    3.45    0.70 
  10   9  -1    4.02    1.06 
   9 -10  -1    3.72    1.32 
  10   9  -1    4.89    1.18 
  10   9   1    6.37    1.16 
   9 -10   1    3.19    0.93 
   9 -10   1    5.47    1.06 
   9 -10   1    2.90    1.12 
   9 -10   1    4.29    1.12 
   9 -10   1    4.60    1.19 
  10   9   1    2.73    0.91 
  -9  10   1    8.25    1.68 
  10   8  -1   17.44    1.79 
  10   8  -1   14.47    1.30 
   8 -10  -1   14.56    1.79 
  10   8  -1   15.11    1.31 
   8 -10  -1   19.19    1.91 
   8 -10  -1   18.38    2.07 
   8 -10  -1   17.98    2.17 
  -8  10  -1   19.52    2.36 
  10   8  -1   13.12    1.75 
  10   8   1   17.63    1.77 
   8 -10   1   16.70    1.81 
   8 -10   1   14.17    1.67 
   8 -10   1   14.51    1.83 
   8 -10   1   16.39    1.94 
  -8  10   1   15.09    2.24 
  10   7  -1    4.31    0.55 
   7 -10  -1    5.15    1.22 
  -7  10  -1    4.94    1.35 
 -10  -7  -1    5.51    0.97 
   7 -10  -1    3.79    0.99 
  10   7  -1    6.00    1.04 
  10   7  -1    4.89    1.01 
  10   7  -1    5.51    0.60 
   7 -10  -1    5.89    1.16 
 -10  -7  -1    5.51    0.97 
  10   7   1    5.12    0.93 
   7 -10   1    4.60    1.04 
   7 -10   1    4.12    1.02 
  -7  10   1    1.32    1.04 
   7 -10   1    4.38    1.10 
   6 -10  -1   46.98    3.73 
  10   6  -1   45.66    3.60 
  10   6  -1   44.01    3.41 
 -10  -6  -1   50.59    3.51 
   6 -10  -1   48.20    3.85 
   6 -10  -1   50.05    4.21 
   6 -10  -1   48.50    3.69 
 -10  -6  -1   50.64    3.51 
  -6  10  -1   43.04    4.04 
   6 -10  -1   47.65    3.68 
   6 -10  -1   43.12    3.98 
   6 -10   1   45.90    3.74 
   6 -10   1   45.12    3.62 
   6 -10   1   47.24    4.09 
   6 -10   1   43.96    3.65 
  10   6   1   49.02    3.48 
   6 -10   1   47.72    4.00 
 -10  -6   1   45.35    3.55 
 -10  -6   1   45.33    3.56 
   6 -10   1   50.98    3.65 
  -6  10   1   48.85    4.14 
   5 -10  -1   26.25    2.64 
   5 -10  -1   29.35    2.40 
   5 -10  -1   21.73    2.47 
   5 -10  -1   25.71    2.65 
  10   5  -1   27.10    2.14 
   5 -10  -1   22.75    2.40 
 -10  -5  -1   24.73    2.08 
 -10  -5  -1   26.25    2.07 
   5 -10  -1   28.50    2.41 
  -5  10  -1   29.93    2.83 
   5 -10  -1   28.23    2.38 
 -10  -5  -1   26.28    2.08 
  10   5  -1   23.87    2.19 
   5 -10   1   22.53    2.29 
  -5  10   1   21.68    2.60 
 -10  -5   1   25.42    2.18 
   5 -10   1   25.55    2.61 
   5 -10   1   23.49    2.34 
   5 -10   1   25.90    2.55 
  -5  10   1   26.85    2.60 
 -10  -5   1   25.40    2.18 
  10   5   1   26.03    2.02 
   5 -10   1   25.98    2.66 
   5 -10   1   30.96    2.44 
   5 -10   1   23.02    2.42 
   4 -10  -1   12.40    1.62 
 -10  -4  -1   14.88    1.31 
 -10  -4  -1   10.84    1.21 
 -10  -4  -1   10.86    1.21 
   4 -10  -1   15.12    1.36 
   4 -10  -1   16.86    1.80 
   4 -10  -1   13.05    1.80 
  -4  10  -1   12.27    1.80 
  10   4  -1   12.85    1.39 
   4 -10  -1   12.47    1.74 
   4 -10  -1   15.42    1.64 
  -4  10  -1   14.85    1.94 
   4 -10  -1   15.29    1.91 
   4 -10  -1   11.84    1.65 
   4 -10  -1   12.32    1.62 
  -4  10   1   13.06    2.04 
   4 -10   1   17.78    2.00 
   4 -10   1   13.13    1.15 
   4 -10   1   13.41    1.54 
   4 -10   1   17.08    1.74 
   4 -10   1   15.92    1.90 
 -10  -4   1   15.19    1.43 
  10   4   1   13.97    1.18 
  -4  10   1   14.27    1.79 
   4 -10   1   11.26    1.55 
  10   4   1   12.97    1.16 
  -4  10   1   12.56    1.82 
   4 -10   1   16.96    1.98 
   4 -10   1   13.44    1.67 
 -10  -4   1   14.04    1.39 
 -10  -4   1   14.04    1.40 
  -4  10   1   20.01    2.05 
   4 -10   1   14.18    1.74 
   3 -10  -1   18.15    1.86 
 -10  -3  -1   14.49    1.30 
  10   3  -1   15.13    1.47 
   3 -10  -1   16.18    1.92 
   3 -10  -1   18.97    2.11 
   3 -10  -1   15.21    1.73 
  -3  10  -1   17.62    2.04 
   3 -10  -1   14.33    1.90 
 -10  -3  -1   16.06    1.30 
   3 -10  -1   18.17    1.83 
  -3  10  -1   16.86    2.17 
   3 -10  -1   12.59    1.47 
 -10  -3  -1   16.08    1.30 
  -3  10  -1   15.06    1.94 
  -3  10  -1   12.00    1.80 
  -3  10  -1   17.49    2.08 
   3 -10  -1   13.29    1.65 
  -3  10  -1   14.18    1.81 
   3 -10  -1   18.74    1.87 
   3 -10   1   15.83    1.82 
  -3  10   1   16.52    2.03 
  -3  10   1   16.64    1.91 
   3 -10   1   19.96    2.10 
   3 -10   1   15.07    1.69 
   3 -10   1   15.79    1.75 
   3 -10   1   13.88    1.69 
  -3  10   1   11.92    1.82 
 -10  -3   1   16.45    1.48 
 -10  -3   1   17.10    1.50 
  -3  10   1   16.12    1.87 
  -3  10   1   13.71    2.08 
   3 -10   1   13.28    1.86 
   3 -10   1   13.69    1.89 
  -3  10   1   15.73    1.94 
   3 -10   1   16.97    1.82 
 -10  -3   1   16.42    1.47 
   3 -10   1   16.94    1.50 
  -2  10  -1    0.20    0.63 
  -2  10  -1    0.16    0.69 
   2 -10  -1   -0.22    0.54 
   2 -10  -1   -1.11    0.55 
 -10  -2  -1    0.18    0.27 
 -10  -2  -1    1.44    0.36 
   2 -10  -1    0.02    0.55 
   2 -10  -1    0.51    0.65 
   2 -10  -1    0.20    0.55 
  10   2  -1    0.19    0.44 
   2 -10  -1    0.40    0.57 
  -2  10  -1   -0.74    0.48 
   2 -10  -1    0.16    0.59 
 -10  -2  -1    0.18    0.27 
   2 -10  -1   -0.05    0.65 
  -2  10  -1    0.29    0.57 
   2 -10  -1   -0.21    0.52 
  -2  10  -1    0.94    0.64 
  -2  10  -1   -0.41    0.60 
 -10  -2   1    0.37    0.42 
 -10  -2   1    0.37    0.42 
  -2  10   1   -0.09    0.66 
   2 -10   1   -0.11    0.60 
  -2  10   1    0.19    0.53 
   2 -10   1   -0.53    0.49 
   2 -10   1    0.62    0.62 
   2 -10   1    1.25    0.69 
  -2  10   1    0.10    0.60 
   2 -10   1   -0.52    0.57 
  -2  10   1   -0.07    0.61 
  -2  10   1    0.41    0.75 
   2 -10   1    0.29    0.64 
  -2  10   1    0.06    0.60 
   2 -10   1   -0.14    0.64 
  -2  10   1   -0.06    0.50 
   2 -10   1    0.10    0.54 
   2 -10   1    0.34    0.61 
 -10  -2   1    0.12    0.41 
  -1  10  -1   10.86    1.60 
   1 -10  -1   11.19    1.39 
   1 -10  -1    9.21    1.36 
 -10  -1  -1    8.88    0.84 
   1 -10  -1   10.09    1.30 
  -1  10  -1   11.22    1.58 
   1 -10  -1    9.02    1.36 
  -1  10  -1   11.24    1.56 
  -1  10  -1    8.08    1.45 
   1 -10  -1    7.61    1.40 
 -10  -1  -1    8.62    0.81 
   1 -10  -1   11.99    1.46 
  -1  10  -1    8.29    1.62 
  10   1  -1   11.51    1.02 
   1 -10  -1    9.80    1.23 
   1 -10  -1    8.90    1.44 
  10   1  -1    8.25    1.00 
  -1  10  -1    9.14    1.39 
 -10  -1  -1    8.88    0.84 
  -1  10  -1    9.92    1.31 
   1 -10  -1    6.36    1.29 
 -10  -1   1    8.86    1.00 
   1 -10   1    9.66    1.37 
   1 -10   1    7.47    1.42 
   1 -10   1   10.57    1.54 
  -1  10   1    8.59    1.42 
   1 -10   1    8.99    1.33 
  -1  10   1    8.91    1.65 
  -1  10   1   10.71    1.52 
  -1  10   1    8.41    1.35 
   1 -10   1    8.81    1.32 
  10   1   1    8.08    1.51 
   1 -10   1    7.00    1.38 
   1 -10   1   10.21    1.22 
  -1  10   1    7.36    1.37 
  -1  10   1    8.14    1.23 
   1 -10   1   10.09    1.33 
 -10  -1   1    9.87    0.97 
  -1  10   1    9.47    1.50 
   1 -10   1    7.19    1.26 
 -10  -1   1    8.83    1.00 
 -10   0  -1    1.23    0.39 
   0 -10  -1    0.71    0.65 
 -10   0  -1    1.23    0.39 
   0  10  -1    1.71    0.81 
  10   0  -1    1.70    0.55 
  10   0  -1    1.87    0.56 
 -10   0  -1    1.59    0.36 
   0 -10  -1    2.56    0.80 
   0  10  -1    2.16    0.77 
   0 -10  -1    2.06    0.85 
   0  10  -1    0.05    0.60 
   0 -10  -1    2.73    0.83 
   0  10  -1    1.99    0.83 
   0  10  -1    1.10    0.79 
 -10   0  -1    1.59    0.36 
   0 -10  -1    1.47    0.80 
   0  10  -1    1.92    0.73 
   0  10  -1    0.97    0.80 
   0 -10  -1    1.89    0.74 
   0 -10  -1    1.93    0.89 
   0 -10  -1    2.14    0.78 
   0 -10   1    1.04    0.66 
 -10   0   1    1.14    0.48 
   0 -10   1    1.98    0.77 
   0  10   1    3.39    1.01 
   0 -10   1    2.85    0.96 
  10   0   1    0.92    0.88 
   0 -10   1    2.53    0.93 
   0  10   1    3.55    0.98 
   0  10   1    0.06    0.66 
   0  10   1    1.76    0.82 
   0 -10   1    2.46    0.84 
   0 -10   1    1.34    0.72 
   0 -10   1    2.35    0.77 
   0  10   1    1.50    0.86 
 -10   0   1    2.02    0.53 
   0  10   1    1.75    0.86 
 -10   0   1    1.14    0.48 
   0  10   1    2.26    0.75 
   0 -10   1    0.69    0.72 
   0 -10   1    3.93    0.94 
   1  10  -1    9.45    1.46 
  -1 -10  -1    9.15    1.35 
  -1 -10  -1   11.81    1.57 
 -10   1  -1    9.04    0.94 
   1  10  -1    9.06    1.45 
 -10   1  -1    9.66    0.89 
   1  10  -1    9.69    1.72 
   1  10  -1   10.29    1.55 
  -1 -10  -1    9.14    1.53 
  -1 -10  -1    9.41    1.38 
  -1 -10  -1   11.74    1.38 
  -1 -10  -1   10.51    1.45 
 -10   1  -1    9.04    0.94 
 -10   1  -1    9.65    0.90 
   1  10  -1   10.91    1.46 
  10  -1  -1    7.66    1.47 
  -1 -10  -1    9.10    1.48 
  10  -1  -1    9.01    1.02 
   1  10  -1    9.05    1.50 
   1  10  -1   11.29    1.36 
  10  -1  -1    8.85    1.05 
  10  -1   1   11.86    0.96 
   1  10   1   10.12    1.46 
  10  -1   1    8.38    0.87 
  -1 -10   1   10.73    1.58 
   1  10   1    9.99    1.44 
   1  10   1    9.83    1.69 
  -1 -10   1    8.61    1.44 
  -1 -10   1    7.61    1.31 
 -10   1   1   11.95    1.09 
 -10   1   1   10.14    1.10 
   1  10   1   10.58    1.55 
   1  10   1    9.22    1.42 
  10  -1   1   10.20    1.56 
  -1 -10   1   10.60    1.43 
   1  10   1    7.89    1.36 
  -1 -10   1    7.41    1.32 
   1  10   1    8.26    1.23 
  -1 -10   1   10.63    1.31 
  -1 -10   1   10.59    1.44 
 -10   1   1   10.13    1.09 
  10  -1   1   10.26    0.88 
  -1 -10   1    6.81    1.36 
  -2 -10  -1   -0.04    0.62 
 -10   2  -1    0.38    0.34 
  -2 -10  -1    0.66    0.65 
  -2 -10  -1    0.92    0.70 
   2  10  -1    1.09    0.67 
   2  10  -1   -0.18    0.70 
  -2 -10  -1   -0.85    0.51 
   2  10  -1    0.44    0.63 
   2  10  -1    0.66    0.61 
   2  10  -1    0.39    0.53 
 -10   2  -1    0.38    0.34 
  10  -2  -1    0.14    0.44 
  10  -2  -1   -0.63    0.66 
 -10   2  -1    0.02    0.33 
   2  10  -1    0.51    0.56 
   2  10  -1    0.00    0.56 
  10  -2  -1    0.22    0.50 
 -10   2  -1    0.02    0.33 
  -2 -10  -1    0.35    0.57 
  10  -2  -1    0.48    0.40 
   2  10   1    0.00    0.62 
 -10   2   1   -0.01    0.42 
   2  10   1    0.01    0.54 
   2  10   1    0.80    0.72 
  10  -2   1    0.05    0.36 
  -2 -10   1    0.62    0.72 
 -10   2   1    0.41    0.42 
  10  -2   1    0.91    0.46 
  10  -2   1    0.46    0.78 
   2  10   1    0.06    0.46 
  -2 -10   1    0.48    0.72 
   2  10   1    1.08    0.62 
  -2 -10   1    0.23    0.61 
   2  10   1    0.13    0.63 
  10  -2   1    0.45    0.39 
   2  10   1   -0.22    0.50 
  -2 -10   1    0.90    0.68 
  -2 -10   1    0.37    0.60 
 -10   2   1   -0.01    0.42 
  -2 -10   1    0.46    0.63 
 -10   2   1    0.41    0.42 
  -2 -10   1   -0.01    0.59 
 -10   3  -1   16.10    1.46 
   3  10  -1   14.33    1.79 
  -3 -10  -1   16.18    1.83 
  10  -3  -1   18.62    1.54 
 -10   3  -1   14.33    1.36 
  -3 -10  -1   17.50    1.99 
   3  10  -1   14.18    1.77 
 -10   3  -1   16.11    1.45 
 -10   3  -1   14.34    1.37 
  10  -3  -1   15.36    1.24 
  10  -3  -1   15.36    1.53 
   3  10  -1   14.81    1.87 
   3  10  -1   14.49    2.12 
   3  10  -1   17.11    1.77 
   3  10  -1   15.85    1.87 
  10  -3  -1   16.28    1.59 
 -10   3  -1   16.97    1.47 
  10  -3  -1   15.42    1.86 
  10  -3  -1   15.31    1.24 
  -3 -10   1   14.23    1.85 
 -10   3   1   18.24    1.62 
  -3 -10   1   15.43    1.76 
   3  10   1   18.63    1.86 
  10  -3   1   17.06    1.95 
   3  10   1   16.20    1.67 
   3  10   1   16.37    2.06 
 -10   3   1   18.25    1.61 
  10  -3   1   15.88    1.43 
  -3 -10   1   14.98    1.72 
  -3 -10   1   14.14    1.70 
   3  10   1   14.27    1.83 
   3  10   1   12.52    1.70 
   3  10   1   13.48    2.03 
   3  10   1   13.68    1.74 
  10  -3   1   16.02    1.39 
  -3 -10   1   13.04    1.75 
   4  10  -1   15.26    1.74 
 -10   4  -1   12.53    1.32 
  10  -4  -1   14.80    1.47 
  -4 -10  -1   12.05    1.76 
   4  10  -1   16.87    2.07 
   4  10  -1   12.55    2.00 
 -10   4  -1   12.54    1.32 
   4  10  -1   15.38    1.85 
 -10   4  -1   12.80    1.40 
  -4 -10  -1   14.66    1.77 
   4  10  -1   15.19    1.79 
  10  -4  -1   14.76    1.28 
  10  -4  -1   17.09    1.62 
  10  -4  -1   14.56    1.28 
  10  -4  -1   14.28    1.84 
   4  10  -1   15.48    1.81 
  10  -4  -1   15.50    1.57 
   4  10   1   14.69    2.05 
   4  10   1   13.70    1.57 
  -4 -10   1   11.23    1.66 
   4  10   1   13.01    1.69 
   4  10   1   13.24    1.78 
 -10   4   1   14.74    1.52 
  10  -4   1   15.15    1.38 
   4  10   1   13.84    1.72 
   4  10   1   15.98    1.73 
   4  10   1    9.68    1.53 
   4  10   1   12.43    1.86 
  -4 -10   1   11.96    1.72 
  10  -4   1   13.14    1.36 
  10  -4   1   17.79    1.97 
  -5 -10  -1   25.24    2.55 
   5  10  -1   20.40    2.34 
  10  -5  -1   27.56    2.45 
  10  -5  -1   26.76    2.11 
  10  -5  -1   26.66    2.10 
   5  10  -1   25.43    2.69 
  10  -5  -1   23.70    2.29 
   5  10  -1   25.68    2.47 
   5  10  -1   24.94    2.47 
   5  10  -1   29.52    2.50 
  10  -5  -1   27.69    2.29 
  10  -5  -1   26.15    2.25 
   5  10  -1   27.10    2.90 
  10  -5  -1   28.79    2.62 
 -10   5  -1   24.41    2.26 
   5  10  -1   25.49    2.50 
  -5 -10  -1   25.57    2.48 
  10  -5   1   26.77    1.86 
  10  -5   1   26.06    1.87 
   5  10   1   22.95    2.22 
  10  -5   1   25.53    2.12 
   5  10   1   23.83    2.44 
  10  -5   1   30.14    2.42 
  -5 -10   1   31.34    2.62 
   5  10   1   27.77    2.42 
   5  10   1   24.97    2.45 
   5  10   1   27.07    2.44 
   5  10   1   27.66    2.74 
   5  10   1   30.05    2.92 
  10  -5   1   23.99    2.22 
  10  -5   1   28.08    2.66 
   5  10   1   26.45    2.37 
  -5 -10   1   28.77    2.60 
   6  10  -1   44.07    3.66 
   6  10  -1   40.72    3.59 
  10  -6  -1   46.76    3.70 
   6  10  -1   49.31    3.82 
  10  -6  -1   41.23    3.80 
   6  10  -1   42.40    4.21 
  10  -6  -1   46.31    3.38 
  10  -6  -1   50.71    3.25 
   6  10  -1   42.32    3.97 
  -6 -10  -1   46.24    3.82 
  10  -6  -1   52.05    3.57 
   6  10  -1   43.72    3.81 
  10  -6  -1   48.07    3.67 
  -6 -10  -1   40.95    3.73 
  10  -6  -1   56.45    3.97 
   6  10  -1   47.37    3.73 
   6  10   1   51.56    3.82 
   6  10   1   55.59    3.73 
  10  -6   1   48.61    3.92 
   6  10   1   51.78    3.86 
   6  10   1   47.58    3.59 
  10  -6   1   48.98    3.67 
   6  10   1   49.88    4.26 
   6  10   1   47.05    3.58 
  10  -6   1   43.36    3.20 
   6  10   1   50.98    4.07 
  -6 -10   1   46.14    3.83 
  10  -6   1   44.67    3.40 
  -6 -10   1   47.89    3.86 
  10  -6   1   47.23    3.81 
  10  -6   1   44.82    3.21 
  -7 -10  -1    4.65    1.19 
   7  10  -1    4.90    1.26 
  -7 -10  -1    7.38    1.29 
  10  -7  -1    6.13    1.25 
   7  10  -1    3.87    1.02 
  10  -7  -1    5.14    0.97 
  10  -7  -1    4.04    1.01 
   7  10  -1    2.79    0.97 
  10  -7  -1    4.57    1.05 
   7  10  -1    7.13    1.33 
  10  -7  -1    5.03    1.20 
   7  10  -1    3.67    0.98 
  10  -7  -1    5.70    0.86 
  10  -7   1    5.95    0.89 
  10  -7   1    4.45    1.06 
   7  10   1    4.03    0.92 
   7  10   1    2.69    0.92 
  10  -7   1    5.97    1.12 
  10  -7   1    4.11    0.99 
   7  10   1    3.95    0.91 
   7  10   1    2.82    0.94 
  10  -7   1    5.54    0.87 
   7  10   1    5.22    1.26 
  -7 -10   1    7.42    1.34 
  10  -8  -1   16.86    1.90 
   8  10  -1   14.17    2.04 
  10  -8  -1   14.76    1.91 
   8  10  -1   17.68    1.73 
  10  -8  -1   18.16    1.69 
   8  10  -1   17.72    1.71 
  10  -8  -1   15.51    1.73 
   8  10  -1   13.74    1.72 
  10  -8  -1   15.50    1.57 
   8  10  -1   15.72    1.95 
  10  -8   1   16.92    1.81 
 -10   8   1   15.33    2.12 
  -8 -10   1   17.83    2.05 
  10  -8   1   17.25    1.67 
   8  10   1   14.40    1.96 
   8  10   1   15.32    1.63 
  10  -8   1   12.68    1.78 
   8  10   1   15.94    1.51 
   8  10   1   18.76    1.97 
  10  -9  -1    4.20    1.02 
  10  -9  -1    7.33    1.41 
   9  10  -1    5.12    1.31 
  10  -9  -1    4.08    0.94 
  10  -9  -1    7.12    1.23 
   9  10  -1    4.58    0.94 
   9  10  -1    4.89    1.15 
  10  -9  -1    4.57    1.18 
 -10   9   1    5.74    1.49 
  10  -9   1    5.76    1.07 
  10  -9   1    4.57    1.13 
   9  10   1    4.99    0.83 
   9  10   1    6.19    1.25 
  10  -9   1    4.31    1.19 
   9  10   1    4.20    0.83 
   9  10   1    4.31    1.19 
  10  -9   1    4.60    0.84 
  10  10  -1    0.02    0.51 
  10 -10  -1    0.01    0.74 
  10  10  -1    0.40    0.49 
  10  10  -1   -0.40    0.75 
  10 -10  -1    1.08    0.86 
  10 -10  -1   -0.99    0.59 
  10 -10  -1    0.86    0.74 
  10 -10   1   -0.17    0.66 
  10 -10   1    0.23    0.78 
  10 -10   1   -0.48    0.58 
  10  10   1    0.15    0.65 
  10 -11  -1    6.92    1.19 
  10 -11  -1    7.52    1.33 
  10 -11  -1    5.47    1.35 
  10 -11   1    8.23    1.49 
  10 -11   1    5.42    1.04 
   9 -11  -1   26.13    2.57 
   9 -11  -1   23.95    2.34 
   9 -11  -1   22.24    2.32 
   9 -11   1   21.02    2.36 
   9 -11   1   22.69    2.42 
   9 -11   1   25.72    2.30 
   9 -11   1   22.49    2.21 
   8 -11  -1   -0.23    0.63 
  11   8  -1    1.16    0.74 
  -8  11  -1    1.85    1.07 
   8 -11  -1    2.16    0.87 
   8 -11  -1    1.65    0.99 
   8 -11   1    1.08    0.79 
   8 -11   1    2.79    1.02 
   8 -11   1    0.67    0.71 
  -8  11   1    1.12    0.97 
  11   8   1    2.54    0.76 
 -11  -7  -1   25.66    2.27 
  -7  11  -1   26.56    2.97 
   7 -11  -1   26.37    2.62 
   7 -11  -1   23.36    2.37 
  11   7  -1   22.20    2.21 
   7 -11  -1   24.32    2.40 
 -11  -7  -1   25.65    2.27 
   7 -11   1   29.64    2.61 
  -7  11   1   22.60    2.83 
  11   7   1   25.11    2.10 
   7 -11   1   25.99    2.39 
   7 -11   1   26.01    2.38 
   6 -11  -1    0.49    0.85 
   6 -11  -1    0.24    0.79 
  -6  11  -1    0.96    1.04 
 -11  -6  -1    1.11    0.58 
   6 -11  -1    2.13    0.87 
   6 -11  -1    0.25    0.66 
  11   6  -1    0.85    0.58 
 -11  -6  -1    1.11    0.58 
  11   6   1    0.38    0.43 
   6 -11   1   -0.01    0.75 
 -11  -6   1    1.33    0.65 
 -11  -6   1    1.33    0.65 
  -6  11   1   -0.13    0.76 
   6 -11   1   -0.13    0.68 
   6 -11   1    0.01    0.68 
   6 -11   1    0.72    0.69 
   5 -11  -1   13.20    1.92 
   5 -11  -1   11.50    1.65 
  11   5  -1   11.80    1.33 
 -11  -5  -1   13.58    1.34 
 -11  -5  -1   13.58    1.34 
   5 -11  -1    9.07    1.56 
 -11  -5  -1   14.00    1.39 
  -5  11  -1   11.82    1.97 
   5 -11  -1   11.63    1.74 
  -5  11   1   12.89    1.98 
 -11  -5   1   11.33    1.38 
   5 -11   1   14.06    1.78 
   5 -11   1   10.34    1.75 
  -5  11   1   10.44    1.91 
 -11  -5   1   11.35    1.38 
  11   5   1   14.28    1.08 
   5 -11   1   16.35    1.80 
   5 -11   1   14.76    1.78 
   4 -11  -1    7.73    1.45 
  -4  11  -1   10.02    1.72 
   4 -11  -1    8.26    1.36 
   4 -11  -1   10.99    1.74 
  -4  11  -1   11.34    1.84 
 -11  -4  -1   10.89    1.11 
 -11  -4  -1   11.38    1.13 
   4 -11  -1   12.04    1.80 
   4 -11  -1   11.08    1.14 
  11   4  -1   10.85    1.17 
 -11  -4  -1   10.88    1.11 
   4 -11  -1   10.14    1.75 
   4 -11  -1   10.15    1.58 
   4 -11  -1    9.75    1.53 
  -4  11   1   11.21    1.81 
   4 -11   1    9.62    1.59 
   4 -11   1   11.38    1.43 
   4 -11   1    7.80    1.56 
   4 -11   1   11.23    1.81 
   4 -11   1   11.38    1.71 
   4 -11   1   10.56    1.55 
 -11  -4   1   11.07    1.27 
   4 -11   1   10.39    1.54 
  -4  11   1   10.13    1.77 
 -11  -4   1   11.07    1.27 
   4 -11   1    8.26    1.46 
   3 -11  -1   44.93    3.66 
  -3  11  -1   42.24    3.65 
   3 -11  -1   38.28    3.37 
   3 -11  -1   39.73    3.38 
   3 -11  -1   40.48    3.77 
  11   3  -1   44.67    3.09 
   3 -11  -1   43.90    3.82 
  -3  11  -1   35.38    3.64 
   3 -11  -1   42.67    3.24 
 -11  -3  -1   39.08    2.96 
   3 -11  -1   37.44    3.36 
 -11  -3  -1   46.04    3.01 
  -3  11  -1   42.10    4.04 
  -3  11  -1   45.23    3.73 
   3 -11  -1   44.22    3.48 
 -11  -3  -1   39.07    2.96 
  -3  11  -1   44.66    3.68 
  -3  11  -1   46.20    3.81 
  -3  11   1   43.19    3.75 
   3 -11   1   40.62    3.42 
   3 -11   1   37.28    3.33 
   3 -11   1   41.24    3.85 
   3 -11   1   45.79    3.83 
   3 -11   1   38.13    3.37 
  -3  11   1   50.63    3.80 
   3 -11   1   40.23    3.37 
 -11  -3   1   42.28    3.12 
 -11  -3   1   48.08    3.23 
 -11  -3   1   48.02    3.22 
  -3  11   1   47.50    3.82 
  -3  11   1   38.83    3.52 
   3 -11   1   39.67    3.61 
  -3  11   1   37.19    3.97 
   3 -11   1   45.03    3.65 
  -3  11   1   40.32    3.63 
   3 -11   1   39.13    3.09 
 -11  -2  -1    2.46    0.51 
  11   2  -1    3.30    0.63 
  -2  11  -1    4.08    1.11 
   2 -11  -1    2.46    0.95 
   2 -11  -1    2.42    0.90 
 -11  -2  -1    2.24    0.51 
  -2  11  -1    1.96    0.97 
  -2  11  -1    3.04    1.17 
  -2  11  -1    3.28    1.06 
   2 -11  -1    1.76    0.97 
   2 -11  -1    3.47    1.10 
 -11  -2  -1    2.24    0.51 
  -2  11  -1    2.62    1.00 
   2 -11  -1    2.65    0.89 
   2 -11  -1    3.00    1.07 
  11   2  -1    2.61    0.63 
   2 -11  -1    2.55    0.82 
  -2  11  -1    3.43    1.20 
   2 -11  -1    1.40    0.76 
   2 -11   1    2.50    0.93 
  -2  11   1    1.38    0.91 
   2 -11   1    3.07    1.02 
  -2  11   1    3.77    1.21 
 -11  -2   1    2.31    0.65 
   2 -11   1    1.74    0.88 
  -2  11   1    2.58    0.88 
   2 -11   1    1.85    0.81 
  -2  11   1    3.56    1.15 
   2 -11   1    2.97    0.96 
   2 -11   1    3.12    1.06 
 -11  -2   1    3.68    0.67 
  -2  11   1    2.43    0.95 
   2 -11   1    2.41    0.97 
 -11  -2   1    2.32    0.65 
   2 -11   1    1.81    0.99 
  -2  11   1    3.62    1.08 
  -2  11   1    1.59    0.94 
   2 -11   1    2.15    0.74 
   1 -11  -1   -0.29    0.63 
  -1  11  -1    0.85    0.76 
   1 -11  -1    1.72    0.83 
 -11  -1  -1    0.23    0.32 
   1 -11  -1    0.19    0.65 
  -1  11  -1    0.86    0.77 
  11   1  -1    0.77    0.53 
   1 -11  -1    0.11    0.62 
   1 -11  -1    1.01    0.85 
  -1  11  -1   -0.47    0.61 
  -1  11  -1    0.60    0.69 
   1 -11  -1    0.83    0.75 
 -11  -1  -1    0.12    0.33 
   1 -11  -1    0.78    0.65 
 -11  -1  -1    0.12    0.33 
  -1  11  -1    0.24    0.72 
  11   1  -1   -0.08    0.45 
  -1  11  -1   -0.14    0.48 
   1 -11  -1   -0.13    0.61 
  -1  11  -1    0.57    0.72 
  -1  11   1    1.08    0.78 
 -11  -1   1    0.51    0.46 
  -1  11   1    1.49    0.78 
  -1  11   1    0.93    0.66 
   1 -11   1    1.25    0.80 
  11   1   1    1.32    0.95 
 -11  -1   1    0.05    0.40 
   1 -11   1    1.45    0.81 
  -1  11   1    0.19    0.69 
   1 -11   1   -0.24    0.69 
   1 -11   1    2.54    0.97 
 -11  -1   1    0.51    0.47 
  -1  11   1    0.84    0.73 
  -1  11   1    0.85    0.75 
   1 -11   1    0.33    0.66 
   1 -11   1    0.21    0.60 
   1 -11   1    0.86    0.67 
   1 -11   1    0.08    0.65 
   1 -11   1    0.59    0.68 
  -1  11   1    0.29    0.79 
 -11   0  -1    4.37    0.67 
   0  11  -1    6.24    1.55 
  11   0  -1    5.83    0.81 
 -11   0  -1    4.38    0.67 
   0 -11  -1    6.98    1.23 
   0  11  -1    6.05    1.12 
   0 -11  -1    4.68    1.22 
   0 -11  -1    7.63    1.42 
   0  11  -1    6.75    1.37 
   0  11  -1    5.26    1.28 
   0 -11  -1    5.01    1.05 
   0 -11  -1    7.29    1.46 
   0  11  -1    3.48    1.04 
 -11   0  -1    4.37    0.61 
   0 -11  -1    5.59    1.21 
  11   0  -1    6.89    1.42 
   0 -11  -1    5.95    1.21 
   0  11  -1    5.21    1.28 
   0  11  -1    3.50    1.14 
  11   0  -1    5.68    0.81 
   0 -11   1    5.66    1.17 
   0  11   1    6.07    1.30 
   0 -11   1    7.32    1.45 
   0 -11   1    4.76    1.01 
   0 -11   1    4.42    1.10 
 -11   0   1    4.90    0.82 
   0 -11   1    3.57    1.15 
  11   0   1    3.91    1.17 
   0 -11   1    5.67    1.19 
   0  11   1    5.99    1.35 
   0  11   1    6.34    1.33 
   0 -11   1    3.96    1.17 
   0  11   1    5.79    1.44 
 -11   0   1    4.90    0.82 
   0  11   1    4.61    1.19 
   0 -11   1    5.19    1.13 
   0  11   1    7.40    1.19 
 -11   0   1    4.79    0.78 
   0  11   1    5.55    1.26 
   1  11  -1   -0.55    0.69 
   1  11  -1    0.28    0.74 
   1  11  -1    0.43    0.65 
   1  11  -1   -0.06    0.66 
 -11   1  -1    1.01    0.44 
  -1 -11  -1    1.08    0.68 
 -11   1  -1    1.01    0.44 
  -1 -11  -1    0.06    0.64 
  11  -1  -1    0.29    0.47 
   1  11  -1   -0.23    0.60 
 -11   1  -1    0.48    0.34 
  -1 -11  -1   -0.45    0.58 
  11  -1  -1    0.48    0.81 
  -1 -11  -1    0.15    0.65 
  11  -1  -1   -0.20    0.48 
   1  11  -1   -0.24    0.67 
  -1 -11  -1    1.08    0.77 
   1  11  -1   -0.49    0.59 
  -1 -11  -1    0.82    0.74 
 -11   1  -1    0.48    0.34 
   1  11   1    0.49    0.63 
 -11   1   1    0.73    0.51 
   1  11   1   -0.84    0.48 
   1  11   1    0.31    0.75 
  -1 -11   1   -0.07    0.63 
  -1 -11   1    0.13    0.74 
  -1 -11   1    0.68    0.75 
  -1 -11   1    0.39    0.64 
  11  -1   1    0.00    0.78 
  -1 -11   1    0.51    0.76 
 -11   1   1    0.13    0.43 
   1  11   1   -0.13    0.59 
   1  11   1    0.84    0.81 
  -1 -11   1    0.99    0.77 
  -1 -11   1    1.26    0.74 
   1  11   1    0.08    0.58 
  -1 -11   1    0.06    0.70 
   1  11   1    1.58    0.84 
 -11   1   1    0.73    0.51 
 -11   2  -1    2.56    0.56 
  -2 -11  -1    1.72    0.89 
   2  11  -1    2.42    0.97 
   2  11  -1    3.05    1.07 
   2  11  -1    3.33    1.16 
  11  -2  -1    2.64    0.68 
   2  11  -1    2.78    1.03 
  -2 -11  -1    2.41    0.96 
  -2 -11  -1    3.32    1.00 
 -11   2  -1    2.57    0.56 
   2  11  -1    3.24    1.02 
  -2 -11  -1    2.84    0.99 
 -11   2  -1    2.44    0.63 
  11  -2  -1    4.18    1.15 
 -11   2  -1    2.44    0.63 
   2  11  -1    3.70    1.09 
  11  -2  -1    2.76    0.71 
  -2 -11  -1    1.90    0.82 
  -2 -11   1    3.34    0.94 
   2  11   1    3.31    1.00 
   2  11   1    1.25    0.91 
   2  11   1    4.17    1.02 
  -2 -11   1    3.54    1.07 
 -11   2   1    3.78    0.74 
 -11   2   1    2.14    0.66 
 -11   2   1    2.14    0.66 
  11  -2   1    2.63    0.50 
   2  11   1    0.56    0.77 
  11  -2   1    2.54    1.07 
   2  11   1    4.83    1.14 
   2  11   1    3.02    0.90 
  11  -2   1    1.82    0.46 
   2  11   1    3.07    1.01 
  -2 -11   1    2.68    0.89 
  11  -2   1    2.29    0.57 
  -2 -11   1    3.23    1.01 
  -3 -11  -1   44.99    3.69 
  11  -3  -1   34.53    3.13 
  -3 -11  -1   37.18    3.69 
   3  11  -1   42.79    3.65 
 -11   3  -1   46.46    3.10 
   3  11  -1   38.48    3.49 
   3  11  -1   46.09    3.71 
 -11   3  -1   39.50    3.09 
  11  -3  -1   41.62    3.03 
   3  11  -1   42.49    3.55 
  -3 -11  -1   41.51    3.56 
 -11   3  -1   46.47    3.09 
  11  -3  -1   40.02    3.52 
   3  11  -1   42.35    4.09 
 -11   3   1   41.97    3.25 
   3  11   1   39.43    3.49 
 -11   3   1   41.95    3.24 
  11  -3   1   41.53    3.04 
  -3 -11   1   42.68    3.45 
  -3 -11   1   44.38    3.50 
 -11   3   1   45.72    3.30 
   3  11   1   45.83    3.65 
  11  -3   1   42.24    2.91 
  -3 -11   1   44.58    3.67 
   3  11   1   39.27    3.28 
  11  -3   1   39.54    3.58 
   3  11   1   45.71    4.10 
  -3 -11   1   40.24    3.57 
   3  11   1   42.53    3.50 
   3  11   1   41.59    3.51 
   4  11  -1   11.75    2.01 
   4  11  -1   10.62    1.75 
  -4 -11  -1   11.34    1.76 
  -4 -11  -1   11.30    1.81 
  11  -4  -1   10.59    1.72 
  -4 -11  -1    9.35    1.54 
   4  11  -1   12.52    1.76 
  11  -4  -1    8.38    1.24 
  11  -4  -1   10.67    1.27 
   4  11  -1   11.00    1.61 
 -11   4  -1   10.14    1.25 
   4  11  -1   11.21    1.64 
  11  -4  -1   10.40    0.90 
  11  -4   1   13.91    1.91 
  11  -4   1   12.34    1.23 
   4  11   1   10.27    1.57 
   4  11   1   12.13    1.90 
   4  11   1    7.00    1.69 
   4  11   1    9.86    1.45 
 -11   4   1   10.73    1.35 
  -4 -11   1   13.36    1.82 
  11  -4   1   10.19    1.16 
   4  11   1   11.15    1.70 
  -4 -11   1    9.84    1.60 
   4  11   1   11.75    1.61 
   4  11   1    9.38    1.54 
  11  -5  -1   15.84    2.00 
  -5 -11  -1   14.12    1.83 
   5  11  -1   14.76    1.83 
   5  11  -1   11.16    1.74 
   5  11  -1   17.72    2.23 
  11  -5  -1   12.75    1.48 
  11  -5  -1   10.80    1.49 
  -5 -11  -1   16.41    2.00 
 -11   5  -1   13.00    1.54 
  11  -5  -1   13.81    1.18 
  11  -5  -1   13.68    1.21 
   5  11  -1   13.46    1.92 
   5  11   1   11.48    1.63 
  11  -5   1   14.49    1.44 
  11  -5   1   10.14    1.34 
   5  11   1   10.32    1.87 
   5  11   1   13.19    1.77 
  -5 -11   1   13.78    1.89 
   5  11   1   14.13    1.64 
  11  -5   1   14.99    2.03 
  -5 -11   1   10.89    1.74 
   5  11   1   14.07    1.87 
   5  11   1   15.05    1.79 
   6  11  -1    1.27    0.96 
  11  -6  -1    0.61    1.09 
   6  11  -1    0.42    0.74 
  11  -6  -1    0.66    0.50 
  -6 -11  -1    0.22    0.79 
   6  11  -1    0.05    0.69 
   6  11  -1    1.01    0.76 
  11  -6  -1    0.18    0.63 
   6  11  -1    0.37    0.73 
  -6 -11  -1    0.61    0.78 
  11  -6  -1   -0.28    0.44 
  11  -6  -1   -1.01    0.57 
  -6 -11   1    1.60    0.88 
  11  -6   1    0.38    0.65 
   6  11   1    0.69    0.80 
   6  11   1    1.15    0.77 
  11  -6   1    0.10    1.06 
   6  11   1    0.06    0.66 
  11  -6   1    0.38    0.59 
   6  11   1    0.90    0.71 
   6  11   1   -0.31    0.65 
  -6 -11   1    0.08    0.76 
  11  -7  -1   26.25    2.38 
   7  11  -1   33.63    3.04 
   7  11  -1   26.72    2.76 
  11  -7  -1   24.25    2.16 
   7  11  -1   25.81    2.43 
   7  11  -1   28.24    2.49 
  -7 -11  -1   26.16    2.69 
   7  11  -1   29.50    2.62 
  11  -7  -1   26.52    2.55 
   7  11   1   27.94    2.87 
  11  -7   1   22.86    1.90 
   7  11   1   27.08    2.38 
  -7 -11   1   26.51    2.72 
  11  -7   1   26.70    2.46 
  11  -7   1   24.91    2.30 
   7  11   1   23.99    2.61 
   7  11   1   30.62    2.54 
  11  -7   1   27.72    1.97 
   7  11   1   24.96    2.34 
   8  11  -1    1.39    1.03 
  11  -8  -1    0.42    0.82 
   8  11  -1    1.85    0.82 
  11  -8  -1    0.99    0.80 
   8  11  -1    0.20    0.68 
  11  -8  -1    1.11    0.72 
   8  11  -1    1.44    0.78 
   8  11  -1    0.30    0.76 
   8  11   1    0.06    0.65 
  11  -8   1    0.42    0.54 
   8  11   1    0.28    0.64 
   8  11   1    0.64    0.91 
  11  -8   1    1.04    0.81 
  -8 -11   1    1.99    0.96 
  11  -8   1    2.23    0.89 
  11  -8   1    1.44    0.57 
  11  -9  -1   24.39    2.47 
   9  11  -1   22.08    2.17 
  11  -9  -1   23.13    2.22 
   9  11  -1   22.25    2.49 
  11  -9   1   28.82    2.15 
   9  11   1   25.98    2.49 
   9  11   1   24.36    2.01 
  11  -9   1   22.72    2.32 
  10  11  -1    5.50    1.33 
  11 -10  -1    6.29    1.42 
  10  11   1    6.65    1.31 
  11 -10   1    7.82    1.40 
  11 -11  -1   -0.95    0.74 
  11 -11   1   -0.52    0.78 
  11 -12  -1    0.76    0.91 
  11 -12   1    1.62    1.01 
  10 -12  -1   -0.26    0.79 
  10 -12  -1    0.53    0.80 
  10 -12  -1    0.08    0.78 
  10 -12   1    0.51    0.72 
  10 -12   1    0.82    0.88 
   9 -12  -1    2.34    1.00 
   9 -12  -1    1.58    1.08 
   9 -12  -1    1.05    0.87 
   9 -12   1    0.36    0.80 
   9 -12   1   -0.40    0.70 
   9 -12   1    0.70    0.90 
   8 -12  -1   -0.12    0.66 
   8 -12  -1    0.21    0.75 
   8 -12  -1    0.07    0.83 
   8 -12   1    0.98    0.90 
   8 -12   1    0.48    0.80 
   8 -12   1    0.85    0.81 
   7 -12  -1   47.22    3.77 
   7 -12  -1   44.46    3.58 
   7 -12  -1   40.63    3.56 
   7 -12   1   42.01    3.51 
   7 -12   1   43.05    3.51 
   7 -12   1   42.77    3.64 
   6 -12  -1    0.80    0.88 
  -6  12  -1   -0.11    1.02 
   6 -12  -1    0.94    0.78 
 -12  -6  -1    0.92    0.63 
   6 -12  -1    0.90    0.76 
 -12  -6  -1    0.92    0.63 
  12   6  -1    0.97    0.60 
  -6  12   1    1.53    1.12 
   6 -12   1    0.81    0.79 
   6 -12   1    1.38    0.86 
   6 -12   1    2.19    1.04 
   6 -12   1    0.89    0.96 
  -5  12  -1   39.55    3.89 
 -12  -5  -1   42.21    3.15 
  12   5  -1   42.73    3.03 
 -12  -5  -1   42.19    3.15 
   5 -12  -1   41.52    3.68 
   5 -12  -1   37.23    3.42 
 -12  -5  -1   41.90    3.17 
   5 -12  -1   46.99    3.64 
   5 -12  -1   38.77    3.46 
  -5  12   1   42.46    3.94 
   5 -12   1   36.12    3.66 
  -5  12   1   45.99    3.89 
   5 -12   1   41.43    3.51 
 -12  -5   1   40.85    3.27 
   5 -12   1   37.78    3.40 
   5 -12   1   39.98    3.45 
   5 -12   1   43.47    3.68 
 -12  -5   1   40.89    3.27 
   4 -12  -1    1.78    0.59 
   4 -12  -1    1.25    0.96 
   4 -12  -1    0.59    0.78 
   4 -12  -1    2.08    0.94 
 -12  -4  -1    2.03    0.62 
   4 -12  -1    0.54    0.76 
  -4  12  -1   -0.26    0.84 
  12   4  -1    1.46    0.63 
  -4  12  -1    0.75    0.87 
 -12  -4  -1    1.52    0.58 
  12   4  -1    1.27    0.49 
   4 -12  -1    1.40    0.94 
 -12  -4  -1    2.03    0.62 
   4 -12   1    1.94    1.00 
  -4  12   1    3.15    1.16 
 -12  -4   1    1.79    0.68 
   4 -12   1    0.79    0.85 
   4 -12   1    1.41    0.87 
 -12  -4   1    1.79    0.68 
   4 -12   1    2.25    1.01 
   4 -12   1    2.57    0.99 
  -4  12   1    1.96    1.06 
   3 -12  -1    0.94    0.66 
   3 -12  -1   -0.07    0.65 
   3 -12  -1    0.52    0.83 
 -12  -3  -1    0.20    0.41 
   3 -12  -1    0.33    0.71 
  12   3  -1    0.64    0.38 
 -12  -3  -1    0.20    0.41 
  -3  12  -1    0.36    0.85 
   3 -12  -1    0.45    0.73 
   3 -12  -1    0.47    0.83 
  -3  12  -1   -0.42    0.87 
  -3  12  -1    1.86    0.99 
 -12  -3  -1    0.76    0.49 
  12   3   1   -0.28    0.71 
 -12  -3   1    0.95    0.54 
  -3  12   1    1.55    0.94 
   3 -12   1    1.27    0.82 
   3 -12   1    0.74    0.82 
   3 -12   1    1.16    0.61 
  -3  12   1    0.48    0.80 
  -3  12   1    0.86    0.94 
   3 -12   1    1.20    0.86 
   3 -12   1    1.45    0.85 
   3 -12   1    0.43    0.85 
  -3  12   1    1.47    1.05 
   3 -12   1    0.49    0.68 
 -12  -3   1    0.95    0.54 
  -3  12   1    0.47    0.91 
  -2  12  -1    0.70    1.04 
   2 -12  -1    0.58    0.82 
  -2  12  -1    0.13    0.82 
 -12  -2  -1    0.63    0.44 
   2 -12  -1    2.62    1.03 
   2 -12  -1   -0.29    0.64 
  12   2  -1    0.34    0.37 
 -12  -2  -1    0.14    0.39 
   2 -12  -1   -0.63    0.76 
 -12  -2  -1    0.63    0.44 
   2 -12  -1   -0.34    0.71 
  -2  12  -1   -0.32    0.74 
  -2  12  -1    0.83    0.79 
   2 -12  -1    0.75    0.72 
   2 -12  -1    0.71    0.80 
  -2  12  -1    0.95    0.85 
  -2  12  -1    0.40    0.90 
  12   2  -1    0.43    0.39 
   2 -12   1    0.64    0.69 
   2 -12   1    1.02    0.82 
 -12  -2   1    0.49    0.50 
  -2  12   1    1.65    0.83 
   2 -12   1   -0.10    0.77 
  12   2   1    0.11    0.79 
  -2  12   1    1.37    0.93 
   2 -12   1    0.86    0.79 
   2 -12   1    0.50    0.83 
 -12  -2   1    0.49    0.50 
 -12  -2   1    0.70    0.55 
  -2  12   1   -0.45    0.73 
   2 -12   1    1.40    0.72 
   2 -12   1    0.82    0.76 
  -2  12   1    0.59    0.83 
  -2  12   1    0.18    0.79 
  -2  12   1    1.08    1.05 
 -12  -1  -1    7.82    0.90 
   1 -12  -1    8.28    1.49 
 -12  -1  -1    8.98    0.99 
  12   1  -1   11.08    0.97 
  12   1  -1    9.81    0.95 
 -12  -1  -1    8.97    0.99 
   1 -12  -1    8.72    1.49 
  -1  12  -1   12.48    1.92 
   1 -12  -1    7.05    1.26 
   1 -12  -1    6.94    1.53 
  -1  12  -1    7.71    1.59 
   1 -12  -1    8.32    1.61 
  -1  12  -1   12.89    1.95 
  -1  12  -1   13.89    2.19 
   1 -12  -1    6.49    1.60 
  12   1  -1    9.23    1.75 
  -1  12  -1    8.04    1.66 
  -1  12  -1    9.67    1.67 
   1 -12  -1   10.10    1.57 
  -1  12   1   11.78    2.06 
  -1  12   1   10.91    1.55 
   1 -12   1    7.43    1.47 
  -1  12   1    8.39    1.58 
  -1  12   1    9.57    1.69 
   1 -12   1    9.11    1.47 
   1 -12   1    8.89    1.27 
 -12  -1   1    7.87    1.09 
 -12  -1   1    8.30    1.04 
  -1  12   1    7.49    1.60 
  -1  12   1    8.03    1.62 
 -12  -1   1    7.87    1.09 
  -1  12   1    8.00    1.59 
  12   1   1    9.05    1.72 
   1 -12   1    7.16    1.61 
   1 -12   1    9.88    1.77 
   1 -12   1   10.04    1.59 
   1 -12   1    8.25    1.52 
   1 -12   1   10.54    1.81 
   0 -12  -1   -0.36    0.75 
   0  12  -1   -0.17    0.71 
 -12   0  -1    0.04    0.40 
   0 -12  -1    0.44    0.71 
  12   0  -1    0.70    0.48 
  12   0  -1    0.18    0.52 
   0  12  -1    1.11    0.89 
   0  12  -1    0.52    0.85 
   0  12  -1   -0.78    0.88 
   0  12  -1   -0.25    0.73 
   0 -12  -1    0.69    0.72 
   0 -12  -1   -1.29    0.67 
 -12   0  -1    0.11    0.42 
   0 -12  -1    0.84    0.70 
  12   0  -1   -0.67    0.74 
   0  12  -1    0.43    0.72 
 -12   0  -1    0.04    0.40 
   0 -12  -1    0.14    0.79 
   0 -12  -1   -0.29    0.73 
   0 -12   1   -0.74    0.65 
   0  12   1   -0.68    0.75 
   0 -12   1   -0.35    0.72 
   0  12   1    0.54    0.78 
   0  12   1   -0.16    0.73 
 -12   0   1    0.42    0.48 
 -12   0   1    0.16    0.42 
   0  12   1    0.11    0.88 
   0  12   1    1.11    0.78 
   0 -12   1    0.21    0.83 
   0 -12   1   -0.13    0.67 
   0 -12   1    0.83    0.75 
   0  12   1   -0.66    0.54 
  12   0   1    0.18    0.84 
   0 -12   1   -0.50    0.61 
   0 -12   1   -0.92    0.67 
 -12   0   1    0.42    0.48 
  12  -1  -1    8.90    1.64 
  -1 -12  -1   10.15    1.73 
  12  -1  -1    9.53    1.07 
   1  12  -1    7.06    1.50 
 -12   1  -1    9.62    1.03 
   1  12  -1    8.35    1.68 
 -12   1  -1    9.60    1.03 
   1  12  -1    9.19    1.68 
  -1 -12  -1    9.90    1.44 
 -12   1  -1    7.98    0.95 
  -1 -12  -1    8.94    1.51 
   1  12  -1    8.32    1.63 
  -1 -12  -1    9.63    1.54 
  12  -1  -1   11.40    1.09 
   1  12   1   10.04    1.50 
   1  12   1    8.52    1.62 
  12  -1   1    8.41    1.63 
  -1 -12   1   11.90    1.67 
  -1 -12   1    9.58    1.56 
   1  12   1    4.11    1.31 
  -1 -12   1   10.64    1.39 
 -12   1   1    8.30    1.13 
 -12   1   1    8.30    1.13 
  -1 -12   1   11.23    1.66 
   1  12   1    8.10    1.51 
  -1 -12   1    7.47    1.64 
   1  12   1    5.87    1.37 
   2  12  -1   -0.27    0.75 
  -2 -12  -1    0.90    0.81 
  12  -2  -1    0.28    0.55 
   2  12  -1    0.87    0.82 
 -12   2  -1    0.28    0.46 
  12  -2  -1    0.45    0.92 
 -12   2  -1   -0.20    0.42 
  -2 -12  -1    0.60    0.82 
  12  -2  -1    0.29    0.48 
 -12   2  -1    0.28    0.46 
   2  12  -1    0.05    0.71 
  -2 -12  -1    0.17    0.83 
 -12   2  -1    0.63    0.48 
   2  12  -1   -0.04    0.79 
 -12   2  -1   -0.20    0.42 
  -2 -12  -1    0.53    0.80 
  -2 -12   1    0.16    0.70 
  -2 -12   1    1.08    0.86 
   2  12   1    0.76    0.68 
   2  12   1    0.53    0.73 
 -12   2   1    0.15    0.51 
  -2 -12   1   -0.26    0.77 
  12  -2   1   -0.57    0.84 
   2  12   1   -0.46    0.59 
 -12   2   1    0.15    0.51 
   2  12   1    0.30    0.79 
  -2 -12   1    1.65    0.84 
  -3 -12  -1   -0.24    0.73 
  -3 -12  -1    1.87    0.94 
  -3 -12  -1    1.99    0.95 
  12  -3  -1   -0.28    0.49 
   3  12  -1    0.68    0.83 
  -3 -12  -1    0.23    0.78 
 -12   3  -1    0.12    0.46 
   3  12  -1    0.92    0.84 
  12  -3  -1    1.02    0.61 
  12  -3  -1    0.20    0.92 
   3  12  -1    0.27    0.80 
  12  -3   1    0.35    0.39 
  12  -3   1    0.95    1.09 
  -3 -12   1    0.67    0.78 
 -12   3   1    0.16    0.52 
  -3 -12   1    0.64    0.87 
   3  12   1    0.49    0.77 
 -12   3   1    0.16    0.52 
   3  12   1    1.04    0.80 
   3  12   1    1.20    0.79 
 -12   3   1    0.78    0.59 
   3  12   1    0.45    0.69 
  -3 -12   1    0.25    0.74 
  -4 -12  -1    2.06    0.94 
   4  12  -1    1.24    0.83 
 -12   4  -1    1.74    0.74 
   4  12  -1    1.04    0.82 
  -4 -12  -1    1.13    1.00 
  -4 -12  -1    0.82    0.86 
   4  12  -1    1.37    0.96 
  12  -4  -1    0.43    0.95 
  12  -4  -1    1.08    0.70 
  12  -4  -1    2.41    0.79 
   4  12   1    0.89    0.83 
   4  12   1    1.61    0.88 
   4  12   1    0.16    0.73 
   4  12   1    1.34    0.83 
  12  -4   1    1.24    0.64 
  12  -4   1    1.41    0.58 
  12  -4   1    0.40    0.97 
  -4 -12   1    2.75    1.05 
  -4 -12   1    1.58    0.92 
   5  12  -1   45.42    3.72 
   5  12  -1   48.06    3.76 
  12  -5  -1   42.08    3.40 
  12  -5  -1   50.78    3.94 
  -5 -12  -1   45.01    3.81 
  -5 -12  -1   44.57    3.81 
  12  -5  -1   39.27    3.18 
   5  12  -1   43.84    3.82 
   5  12   1   40.25    3.55 
   5  12   1   46.68    3.63 
  -5 -12   1   43.86    3.83 
  12  -5   1   41.47    3.24 
  12  -5   1   40.75    3.10 
   5  12   1   39.03    3.69 
  -5 -12   1   41.90    3.81 
  12  -5   1   38.25    3.70 
  12  -6  -1   -0.37    1.11 
  -6 -12  -1    0.51    0.90 
   6  12  -1    0.58    0.83 
  -6 -12  -1    0.37    0.87 
   6  12  -1    0.65    0.85 
  12  -6  -1    1.35    0.73 
   6  12  -1    0.53    0.77 
  12  -6  -1    0.43    0.65 
  12  -6   1    2.01    0.76 
   6  12   1    0.79    0.89 
  -6 -12   1    0.75    0.92 
   6  12   1    1.08    0.80 
   6  12   1    0.57    0.77 
  12  -6   1   -0.18    0.62 
  12  -6   1    2.52    1.39 
  -6 -12   1    0.69    0.93 
   6  12   1    0.97    1.08 
   6  12   1    0.30    0.75 
   7  12  -1   43.59    3.63 
   7  12  -1   43.88    4.19 
  12  -7  -1   42.35    3.00 
   7  12  -1   37.87    3.75 
  12  -7  -1   46.11    3.03 
   7  12  -1   58.22    3.97 
   7  12  -1   50.08    3.73 
  12  -7  -1   44.40    3.51 
  -7 -12  -1   51.83    4.05 
   7  12   1   43.55    4.05 
   7  12   1   39.53    3.43 
  -7 -12   1   41.58    3.90 
   7  12   1   47.30    3.59 
  12  -7   1   43.52    3.38 
   7  12   1   44.77    3.64 
   7  12   1   51.29    3.99 
   8  12  -1    1.26    0.86 
  12  -8  -1    0.85    0.54 
  12  -8  -1    0.31    0.52 
   8  12  -1    0.13    0.79 
   8  12  -1    0.85    0.75 
  12  -8  -1    0.41    0.78 
   8  12   1    1.43    0.73 
  12  -8   1    0.82    0.81 
   8  12   1    0.77    0.77 
  12  -9  -1    3.42    1.07 
   9  12  -1    1.22    0.92 
  12  -9   1    0.84    0.85 
   9  12   1    0.19    0.78 
  12 -10  -1   -0.36    0.79 
  10  12  -1    0.27    0.84 
  10  12   1   -0.20    0.77 
  12 -10   1   -0.50    0.78 
  12 -11  -1    1.59    0.99 
  12 -11   1    1.09    0.91 
  12 -12  -1    0.69    1.01 
  12 -12   1   -0.50    0.85 
  11 -13  -1   -0.89    0.86 
  11 -13   1    0.84    0.97 
  10 -13  -1    1.50    1.11 
  10 -13  -1    3.55    1.02 
  10 -13   1    1.94    1.07 
   9 -13  -1    8.06    1.47 
   9 -13  -1    8.36    1.67 
   9 -13  -1    9.64    1.61 
   9 -13   1    9.27    1.48 
   9 -13   1    7.25    1.57 
   9 -13   1    8.77    1.43 
   8 -13  -1    3.21    1.11 
   8 -13  -1    3.17    1.18 
   8 -13  -1    3.31    1.14 
   8 -13   1    4.31    1.34 
   8 -13   1    6.12    1.30 
   8 -13   1    4.40    1.15 
   7 -13  -1    6.51    1.43 
   7 -13  -1    8.33    1.54 
   7 -13  -1    9.93    1.73 
   7 -13   1    7.47    1.45 
   7 -13   1    7.86    1.46 
   7 -13   1    7.68    1.61 
   6 -13  -1   -0.20    0.74 
   6 -13  -1    1.75    1.00 
   6 -13  -1    0.35    0.74 
   6 -13   1    0.58    0.93 
   6 -13   1    2.08    0.95 
   6 -13   1   -0.09    0.86 
   6 -13   1    0.10    0.71 
   5 -13  -1   10.37    1.75 
   5 -13  -1    9.52    1.68 
   5 -13  -1   11.50    1.85 
   5 -13  -1    8.87    1.81 
   5 -13   1    9.33    1.82 
   5 -13   1   11.70    1.76 
   5 -13   1   11.82    1.79 
  -5  13   1   14.53    2.25 
   5 -13   1   16.09    2.08 
   4 -13  -1   12.16    2.02 
 -13  -4  -1    9.71    1.24 
   4 -13  -1   11.64    1.84 
   4 -13  -1    8.53    1.68 
   4 -13  -1   11.05    1.78 
  -4  13  -1    9.27    1.96 
  -4  13  -1   13.02    2.15 
   4 -13   1    9.49    1.76 
   4 -13   1   10.81    1.89 
   4 -13   1   12.05    1.83 
  13   4   1   14.05    2.15 
  -4  13   1   13.29    2.15 
   4 -13   1   12.42    1.83 
 -13  -4   1   13.85    1.54 
 -13  -4   1   13.89    1.54 
  -4  13   1   11.72    2.09 
   3 -13  -1   24.77    2.19 
   3 -13  -1   28.42    2.70 
   3 -13  -1   23.68    2.50 
   3 -13  -1   25.57    2.68 
  -3  13  -1   21.48    2.83 
  -3  13  -1   27.47    3.02 
  -3  13  -1   31.19    3.23 
 -13  -3  -1   24.56    2.07 
 -13  -3  -1   24.46    2.05 
   3 -13  -1   24.88    2.68 
   3 -13  -1   26.04    2.95 
 -13  -3  -1   24.65    2.07 
   3 -13   1   19.18    2.48 
   3 -13   1   27.35    2.05 
   3 -13   1   24.81    2.65 
 -13  -3   1   26.01    2.30 
   3 -13   1   29.39    2.75 
  -3  13   1   26.26    2.97 
   3 -13   1   26.32    2.51 
  13   3   1   24.61    2.86 
   3 -13   1   25.73    2.87 
  -3  13   1   19.72    2.81 
  -3  13   1   24.30    2.81 
 -13  -3   1   26.04    2.29 
  -3  13   1   24.32    2.92 
  -2  13  -1    3.11    1.19 
   2 -13  -1    2.83    1.01 
   2 -13  -1    3.48    1.22 
  -2  13  -1    5.17    1.43 
   2 -13  -1    2.64    0.89 
   2 -13  -1    3.19    1.16 
  -2  13  -1    3.18    1.29 
  -2  13  -1    4.31    1.31 
   2 -13  -1    1.64    1.12 
 -13  -2  -1    3.15    0.71 
 -13  -2  -1    3.31    0.71 
 -13  -2  -1    3.30    0.71 
  13   2  -1    1.27    1.14 
   2 -13   1    4.47    1.17 
   2 -13   1    3.91    0.89 
 -13  -2   1    3.99    0.85 
  -2  13   1    3.07    1.11 
  -2  13   1    3.71    1.28 
  13   2   1    0.51    0.92 
   2 -13   1    4.33    1.34 
   2 -13   1    1.13    0.98 
   2 -13   1    1.49    0.95 
  -2  13   1    3.76    1.27 
  -2  13   1    3.86    1.26 
 -13  -2   1    4.00    0.86 
   2 -13   1    3.92    1.28 
   1 -13  -1    1.42    0.88 
  -1  13  -1   -0.06    0.85 
  13   1  -1    2.10    1.11 
 -13  -1  -1    0.65    0.50 
 -13  -1  -1    0.97    0.49 
 -13  -1  -1    0.97    0.49 
  -1  13  -1    0.48    0.88 
  -1  13  -1   -0.91    0.79 
   1 -13  -1    1.82    0.99 
  -1  13  -1   -0.35    0.90 
   1 -13  -1    0.79    1.01 
   1 -13  -1    0.43    0.89 
   1 -13  -1    2.37    0.89 
  -1  13   1    0.29    0.75 
   1 -13   1    1.58    1.07 
  13   1   1    1.12    1.01 
  -1  13   1    2.02    1.09 
  -1  13   1    1.40    1.04 
  -1  13   1    2.26    1.10 
 -13  -1   1    1.65    0.65 
   1 -13   1    0.59    0.80 
   1 -13   1    0.47    0.83 
  -1  13   1    0.14    0.82 
 -13  -1   1    1.65    0.65 
   1 -13   1    2.50    0.87 
   1 -13   1    2.21    0.95 
   0  13  -1    3.83    1.31 
   0  13  -1    4.76    1.37 
   0 -13  -1    3.00    1.08 
   0  13  -1    2.61    1.19 
 -13   0  -1    4.31    0.75 
 -13   0  -1    4.59    0.71 
   0  13  -1    4.82    1.46 
   0 -13  -1    3.12    1.14 
   0 -13  -1    2.88    1.32 
  13   0  -1    3.57    1.25 
   0 -13  -1    4.42    1.23 
 -13   0  -1    4.32    0.75 
   0 -13  -1    4.21    1.13 
   0 -13   1    5.61    1.30 
   0 -13   1    4.58    1.47 
  13   0   1    3.95    1.31 
   0  13   1    3.12    1.18 
   0  13   1    3.32    1.05 
   0  13   1    4.61    1.32 
   0  13   1    5.11    1.45 
   0 -13   1    6.92    1.18 
 -13   0   1    4.35    0.91 
   0  13   1    4.15    1.33 
 -13   0   1    4.36    0.91 
   0 -13   1    3.62    1.21 
   0 -13   1    3.50    1.10 
  -1 -13  -1    1.81    0.93 
  -1 -13  -1    0.31    0.71 
   1  13  -1    1.55    0.98 
   1  13  -1    1.18    1.07 
   1  13  -1    2.72    1.13 
  -1 -13  -1    1.98    1.04 
 -13   1  -1    0.60    0.56 
  -1 -13  -1    1.56    0.89 
  13  -1  -1    1.00    1.02 
 -13   1  -1    0.25    0.50 
   1  13  -1   -0.36    0.75 
 -13   1  -1    0.60    0.56 
  -1 -13   1    0.99    0.94 
  -1 -13   1    1.07    0.94 
  -1 -13   1    0.27    0.79 
   1  13   1   -0.22    0.68 
  13  -1   1    1.62    1.03 
   1  13   1    1.95    1.01 
   1  13   1    0.18    0.78 
 -13   1   1    0.43    0.58 
 -13   1   1    0.43    0.58 
   1  13   1    1.43    0.87 
  -1 -13   1    0.54    0.80 
  -1 -13   1    0.70    0.84 
  -2 -13  -1    1.56    0.90 
  -2 -13  -1    2.80    1.02 
  13  -2  -1    3.33    1.27 
  -2 -13  -1    1.37    1.09 
   2  13  -1    3.03    1.10 
  13  -2  -1    4.63    0.70 
  -2 -13  -1    2.47    0.96 
   2  13  -1    4.52    1.39 
 -13   2  -1    1.79    0.66 
   2  13  -1    3.65    1.24 
 -13   2  -1    3.14    0.75 
 -13   2   1    2.85    0.82 
   2  13   1    2.44    1.00 
  -2 -13   1    2.08    0.98 
  13  -2   1    4.06    1.37 
 -13   2   1    2.80    0.85 
   2  13   1    1.19    1.01 
  -2 -13   1    3.46    1.05 
   2  13   1    3.37    1.12 
   2  13   1    5.83    1.45 
  -2 -13   1    3.09    1.13 
  -2 -13   1    2.42    1.20 
 -13   2   1    2.80    0.85 
  -3 -13  -1   29.27    2.68 
   3  13  -1   25.77    2.96 
  13  -3  -1   25.77    2.15 
   3  13  -1   30.73    2.89 
   3  13  -1   22.87    2.78 
 -13   3  -1   28.25    2.34 
  -3 -13  -1   27.72    2.99 
  13  -3  -1   25.53    2.15 
  -3 -13  -1   29.05    2.83 
  13  -3  -1   24.30    2.90 
   3  13   1   26.60    2.85 
   3  13   1   30.65    2.83 
  -3 -13   1   24.68    2.96 
 -13   3   1   24.16    2.38 
  13  -3   1   26.80    2.99 
   3  13   1   26.62    2.99 
   3  13   1   27.25    2.59 
  -3 -13   1   27.57    2.67 
  -3 -13   1   24.28    2.76 
   4  13  -1   12.63    1.98 
 -13   4  -1   10.36    1.44 
  13  -4  -1   12.40    1.34 
   4  13  -1    9.49    1.72 
  -4 -13  -1   12.03    1.92 
   4  13  -1    8.53    1.74 
  13  -4  -1   11.78    2.06 
  13  -4  -1   11.16    1.33 
  -4 -13  -1    8.92    1.79 
  13  -4   1   12.94    2.11 
   4  13   1   10.19    1.82 
  -4 -13   1   10.94    2.01 
   4  13   1   10.77    1.80 
   4  13   1   12.53    1.87 
  -4 -13   1   12.30    1.78 
  -4 -13   1   10.58    1.85 
   5  13  -1   11.13    1.83 
   5  13  -1   11.95    1.88 
  13  -5  -1    9.80    1.34 
  -5 -13  -1   10.20    1.92 
  13  -5  -1   10.68    1.92 
   5  13  -1    8.53    1.73 
   5  13   1   13.33    1.86 
  13  -5   1   12.99    2.10 
   5  13   1   13.87    1.85 
  13  -5   1    9.75    1.23 
  -5 -13   1   11.93    2.04 
   5  13   1   10.02    1.86 
  13  -6  -1    0.18    0.73 
   6  13  -1    1.34    0.97 
   6  13  -1    0.71    0.85 
   6  13  -1    1.30    0.97 
  -6 -13  -1    1.09    1.09 
   6  13   1    0.14    0.78 
  13  -6   1    0.04    0.63 
   6  13   1   -0.16    0.75 
  -6 -13   1    0.70    0.99 
   6  13   1    0.24    0.87 
   7  13  -1    9.11    1.76 
   7  13  -1    8.77    1.53 
   7  13  -1    9.61    1.53 
  13  -7  -1   10.18    1.44 
   7  13   1    7.21    1.33 
  13  -7   1    9.32    1.29 
   7  13   1    9.84    1.80 
  13  -8  -1    4.69    1.16 
   8  13  -1    5.75    1.43 
   8  13  -1    2.47    0.93 
  13  -8   1    3.91    1.01 
   8  13   1    4.57    1.26 
   9  13  -1    8.91    1.72 
  13  -9  -1    9.59    1.46 
  13  -9   1    6.22    1.29 
   9  13   1    9.35    1.59 
  10  13  -1    4.00    1.26 
  13 -10  -1    3.22    1.13 
  10  13   1    3.04    1.11 
  13 -10   1    4.08    1.15 
  13 -11  -1    0.21    0.90 
  13 -11   1    0.93    0.91 
   9 -14  -1    0.74    0.99 
   9 -14  -1    1.18    0.88 
   9 -14  -1    1.58    0.97 
   9 -14   1    0.53    0.92 
   9 -14   1    0.05    0.95 
   9 -14   1   -0.36    0.84 
   8 -14  -1    2.52    1.20 
   8 -14  -1    2.89    1.18 
   8 -14  -1    2.67    1.07 
   8 -14   1    2.99    1.19 
   8 -14   1    4.02    1.15 
   8 -14   1    3.83    1.16 
  14   8   1    3.75    1.37 
   7 -14  -1    2.46    1.09 
   7 -14  -1    1.37    0.97 
   7 -14  -1    1.13    1.04 
  14   7   1   -1.45    0.87 
   7 -14   1    0.85    0.92 
   7 -14   1    1.41    1.06 
   7 -14   1    2.78    1.06 
   6 -14  -1   19.72    2.37 
   6 -14  -1   27.28    2.67 
   6 -14  -1   24.97    2.68 
  14   6   1   16.45    2.61 
   6 -14   1   25.17    2.54 
   6 -14   1   22.26    2.45 
   6 -14   1   20.91    2.55 
   5 -14  -1    1.26    1.22 
   5 -14  -1    1.63    1.05 
   5 -14  -1    3.48    1.20 
   5 -14  -1    3.03    1.24 
   5 -14   1    1.33    0.98 
   5 -14   1    4.39    1.39 
   5 -14   1    3.52    1.16 
   5 -14   1    0.51    0.90 
  14   5   1    3.69    1.40 
  -5  14   1    1.40    1.19 
   4 -14  -1    6.65    1.54 
   4 -14  -1   10.02    1.77 
  -4  14  -1   10.04    2.06 
   4 -14  -1   10.58    2.03 
  14   4  -1   11.17    2.04 
   4 -14  -1   13.48    2.02 
   4 -14   1   12.25    1.94 
   4 -14   1    8.23    1.63 
   4 -14   1    8.92    1.89 
  14   4   1   10.96    2.01 
   4 -14   1    7.88    1.59 
  -4  14   1   10.02    2.08 
   3 -14  -1   13.32    1.32 
  -3  14  -1   11.50    2.21 
  -3  14  -1   10.11    1.98 
  14   3  -1   11.81    2.15 
   3 -14  -1   14.51    2.00 
   3 -14  -1   13.93    2.21 
   3 -14  -1   10.34    1.82 
  -3  14   1   12.88    2.33 
  14   3   1   11.63    2.09 
   3 -14   1   10.48    1.83 
   3 -14   1   11.87    1.96 
   3 -14   1   10.49    1.96 
   3 -14   1    9.56    1.79 
  -3  14   1   12.84    2.27 
   2 -14  -1    0.83    0.92 
  -2  14  -1    1.63    1.09 
   2 -14  -1    0.36    1.12 
   2 -14  -1    1.35    1.02 
  14   2  -1    1.78    1.20 
  -2  14  -1    1.69    1.11 
   2 -14  -1    0.74    0.79 
  -2  14  -1    1.31    1.06 
   2 -14   1    0.21    0.85 
   2 -14   1    0.39    0.83 
   2 -14   1    1.25    0.73 
   2 -14   1    2.11    1.11 
  -2  14   1    0.90    1.13 
  -2  14   1    2.07    1.16 
  14   2   1    2.18    1.18 
  -2  14   1    1.18    1.01 
   1 -14  -1    3.93    1.47 
   1 -14  -1    3.34    1.18 
  14   1  -1    3.32    1.35 
  -1  14  -1    4.21    1.50 
   1 -14  -1    5.07    1.37 
   1 -14  -1    4.56    1.12 
  -1  14  -1    4.05    1.35 
  -1  14  -1    3.65    1.35 
  14   1   1    1.76    1.15 
  -1  14   1    3.40    1.30 
   1 -14   1    3.97    1.44 
   1 -14   1    4.77    1.38 
   1 -14   1    4.82    1.30 
  -1  14   1    1.45    1.05 
  -1  14   1    2.96    1.21 
  -1  14   1    1.40    1.12 
   1 -14   1    4.63    1.01 
   0 -14  -1    0.73    1.00 
   0  14  -1   -0.12    1.03 
   0 -14  -1   -0.57    0.79 
   0  14  -1    0.32    0.98 
   0  14  -1    1.17    1.03 
  14   0  -1    0.76    1.08 
   0 -14  -1   -0.76    0.81 
   0  14  -1   -0.23    0.86 
   0 -14  -1    1.20    0.99 
   0  14   1    0.00    0.75 
   0  14   1    0.25    0.93 
   0 -14   1   -0.18    0.85 
  14   0   1   -0.16    0.87 
   0 -14   1    0.32    0.88 
   0 -14   1   -1.08    0.78 
   0 -14   1    0.53    0.75 
   0  14   1   -0.30    0.79 
   1  14  -1    2.98    1.26 
  -1 -14  -1    3.61    1.14 
  -1 -14  -1    3.89    1.30 
  -1 -14  -1    1.25    1.00 
   1  14  -1    2.23    1.22 
   1  14  -1    3.51    1.34 
  14  -1  -1    0.99    1.05 
   1  14   1    0.29    0.95 
   1  14   1    2.24    1.08 
  -1 -14   1    3.79    1.08 
  14  -1   1    4.96    1.48 
  -1 -14   1    2.44    1.22 
  -1 -14   1    1.82    1.01 
   1  14   1    1.28    1.16 
   2  14  -1    2.38    1.09 
  14  -2  -1    3.24    1.36 
   2  14  -1    3.47    1.32 
  -2 -14  -1    2.22    1.03 
  -2 -14  -1    0.98    1.11 
   2  14  -1    0.05    0.99 
  -2 -14   1    4.37    1.15 
   2  14   1    1.22    1.10 
   2  14   1    0.22    0.80 
  -2 -14   1    3.90    1.26 
  14  -2   1    1.94    1.31 
   2  14   1    0.42    0.97 
  -2 -14   1    2.10    1.03 
  -3 -14  -1   18.15    2.48 
   3  14  -1   10.06    2.03 
   3  14  -1   13.92    2.12 
   3  14  -1   16.28    2.27 
  -3 -14  -1   10.93    1.79 
  14  -3  -1   17.54    2.34 
   3  14   1    9.82    1.89 
  14  -3   1    9.66    2.01 
   3  14   1   11.86    2.00 
  -3 -14   1   14.04    1.84 
  -3 -14   1   12.39    2.14 
   3  14   1   14.65    2.25 
  -4 -14  -1   10.52    2.03 
   4  14  -1    6.42    1.53 
   4  14  -1   11.03    1.93 
   4  14  -1    6.94    1.67 
  14  -4  -1   13.92    2.15 
  14  -4   1    9.53    2.04 
  -4 -14   1    8.89    1.84 
  -4 -14   1    8.92    1.61 
   4  14   1   10.42    1.88 
   4  14   1    9.15    1.74 
   4  14   1    8.76    1.78 
   5  14  -1    2.84    1.22 
  14  -5  -1    2.31    0.84 
  -5 -14  -1    3.31    1.28 
   5  14  -1    1.14    0.99 
   5  14  -1    1.32    1.05 
  -5 -14   1    3.57    1.37 
  14  -5   1    4.18    1.70 
   5  14   1    5.09    1.42 
   5  14   1    2.14    1.09 
   5  14   1    3.03    1.11 
  -6 -14  -1   21.81    2.89 
  14  -6  -1   25.48    2.24 
   6  14  -1   27.14    2.72 
   6  14  -1   21.97    2.83 
   6  14  -1   24.22    2.63 
   6  14   1   24.78    2.56 
   6  14   1   25.01    2.87 
   6  14   1   25.78    2.52 
   7  14  -1    1.59    0.98 
   7  14  -1    2.53    1.08 
   7  14  -1    1.37    1.11 
  14  -7  -1    2.15    0.92 
   7  14   1    2.34    0.97 
   7  14   1    1.00    0.98 
  14  -8  -1    2.33    0.97 
   8  14  -1    3.61    1.27 
   8  14   1    2.69    1.10 
  14  -8   1    4.59    0.99 
  14  -9  -1   -0.18    0.83 
   9  14  -1    0.79    0.97 
   9  14   1    0.36    0.94 
  14  -9   1    1.19    0.84 
   8 -15  -1    9.38    1.78 
   8 -15  -1   11.57    1.73 
   8 -15   1   12.51    1.94 
   8 -15   1    7.11    1.45 
   7 -15  -1   -0.73    0.72 
   7 -15  -1   -0.26    0.83 
   7 -15  -1   -0.06    0.95 
   7 -15   1   -0.35    0.83 
   7 -15   1    1.04    1.07 
   7 -15   1    0.24    0.89 
   6 -15  -1   -0.20    0.91 
  15   6  -1    0.78    1.13 
   6 -15  -1    0.24    0.89 
   6 -15  -1   -0.01    0.97 
   6 -15   1    1.22    1.08 
   6 -15   1   -0.10    0.87 
   6 -15   1    0.45    0.92 
  15   6   1    1.19    1.18 
  15   5  -1    1.13    1.14 
   5 -15  -1    1.71    1.11 
   5 -15  -1    1.64    1.00 
   5 -15  -1    3.82    1.35 
   5 -15   1    4.03    1.33 
  -5  15   1    1.73    1.39 
  15   5   1    3.14    1.28 
   5 -15   1    0.53    0.94 
   5 -15   1    3.25    1.20 
   4 -15  -1    7.72    1.66 
  15   4  -1   11.59    2.17 
  -4  15  -1   11.86    2.21 
   4 -15  -1   11.55    1.91 
  15   4   1   11.04    2.02 
   4 -15   1    7.74    1.77 
  -4  15   1   11.51    2.13 
   4 -15   1    6.35    1.60 
   3 -15  -1   -0.78    0.81 
  15   3  -1   -1.05    0.94 
  -3  15  -1    0.00    0.89 
  -3  15  -1    0.03    1.18 
   3 -15  -1    0.07    0.85 
   3 -15   1    0.59    0.90 
  -3  15   1   -0.32    1.11 
  15   3   1    0.27    1.10 
   3 -15   1   -0.53    0.74 
  -3  15   1   -0.09    1.00 
   2 -15  -1    2.72    1.23 
  15   2  -1    4.55    1.46 
   2 -15  -1    3.23    1.43 
  -2  15  -1    3.27    1.44 
   2 -15  -1    4.95    1.35 
  -2  15  -1    5.88    1.71 
  -2  15   1    2.87    1.41 
   2 -15   1    6.92    1.80 
  15   2   1    5.17    1.57 
  -2  15   1    2.09    1.17 
   2 -15   1    4.15    1.39 
  -2  15   1    6.90    1.73 
   2 -15   1    3.92    1.26 
  -1  15  -1   17.51    2.55 
   1 -15  -1   14.99    2.26 
  15   1  -1   20.18    2.52 
   1 -15  -1   15.50    2.52 
  -1  15  -1   19.42    2.70 
  -1  15  -1   18.39    2.58 
   1 -15  -1   15.30    2.27 
  -1  15   1   21.42    2.73 
   1 -15   1   21.62    2.50 
   1 -15   1   15.75    2.45 
   1 -15   1   13.06    2.18 
  15   1   1   17.20    2.47 
  -1  15   1   14.16    2.46 
  -1  15   1   16.03    2.44 
   0  15  -1    2.23    1.43 
   0  15  -1    5.29    1.62 
  15   0  -1    3.83    1.46 
   0 -15  -1    2.31    1.33 
   0 -15  -1    4.35    1.35 
   0  15  -1    1.49    1.16 
  15   0   1    3.25    1.45 
   0  15   1    4.66    1.58 
   0 -15   1    3.56    1.37 
   0  15   1    2.71    1.29 
   0 -15   1    3.45    1.30 
   0  15   1    2.72    1.23 
   0 -15   1    4.15    1.37 
  -1 -15  -1   17.32    2.35 
   1  15  -1   14.16    2.36 
  -1 -15  -1   14.17    2.42 
   1  15  -1   18.99    2.67 
   1  15  -1   15.08    2.33 
  15  -1  -1   19.24    2.52 
   1  15   1   16.75    2.46 
  15  -1   1   20.43    2.67 
   1  15   1   15.81    2.46 
   1  15   1   15.02    2.31 
  -1 -15   1   15.31    2.49 
  -1 -15   1   18.27    2.35 
  -2 -15  -1    3.31    1.33 
  15  -2  -1    8.04    1.78 
   2  15  -1    1.91    1.17 
   2  15  -1    4.22    1.44 
   2  15  -1    4.05    1.50 
   2  15   1    3.30    1.21 
  15  -2   1    4.02    1.50 
   2  15   1    2.25    1.22 
   2  15   1    2.38    1.34 
  -2 -15   1    3.35    1.25 
  -2 -15   1    3.81    1.47 
   3  15  -1    0.16    0.98 
   3  15  -1    0.14    1.01 
  15  -3  -1    1.16    1.15 
   3  15  -1   -0.16    0.98 
   3  15   1    0.50    0.98 
   3  15   1   -0.30    0.97 
  15  -3   1   -1.52    1.11 
   3  15   1    0.75    0.98 
   4  15  -1    7.96    1.89 
   4  15  -1   12.61    2.02 
  15  -4  -1   13.50    2.14 
   4  15  -1   10.26    1.95 
  15  -4   1    7.56    1.89 
   4  15   1    6.88    1.68 
   4  15   1   11.01    1.90 
   4  15   1   12.05    1.99 
   5  15  -1    1.23    0.99 
   5  15  -1    1.06    1.06 
   5  15  -1    3.14    1.27 
  15  -5   1   -0.96    1.51 
   5  15   1    0.09    0.92 
   5  15   1    1.00    1.03 
   5  15   1    2.61    1.12 
   6  15  -1    1.13    0.99 
   6  15  -1   -0.09    0.91 
   6  15  -1    0.57    1.00 
   6  15   1   -0.79    0.83 
   6  15   1   -0.31    0.76 
   6  15   1    0.61    0.86 
   7  15  -1    0.26    0.96 
   7  15  -1   -0.10    0.88 
   7  15   1   -0.01    0.87 
   6 -16  -1    5.34    1.34 
   6 -16   1    8.49    1.57 
   5 -16  -1    3.58    1.31 
   5 -16  -1    2.81    1.18 
   5 -16   1    4.08    1.52 
   5 -16   1    4.49    1.28 
   5 -16   1    4.23    1.34 
  -4  16  -1   -0.10    1.19 
   4 -16  -1   -0.21    0.89 
   4 -16  -1    0.02    0.96 
   4 -16   1    0.28    0.98 
   4 -16   1    0.86    0.90 
  -4  16   1   -0.02    1.12 
  -3  16  -1    0.91    1.28 
   3 -16  -1    5.29    1.50 
  -3  16  -1    4.94    1.75 
   3 -16  -1    5.73    1.42 
   3 -16   1    3.13    1.26 
  -3  16   1    5.74    1.76 
   3 -16   1    7.01    1.60 
  -3  16   1    5.55    1.66 
  -2  16  -1   15.98    2.55 
   2 -16  -1    9.65    1.94 
  -2  16  -1   12.45    2.26 
  16   2  -1   17.19    2.37 
   2 -16  -1    8.39    1.81 
  -2  16   1   13.20    2.31 
  -2  16   1    9.48    2.02 
  16   2   1   10.48    2.04 
   2 -16   1   11.35    1.96 
  -1  16  -1    6.48    1.69 
  -1  16  -1    1.45    1.18 
   1 -16  -1    2.11    1.18 
   1 -16  -1    1.19    1.15 
  -1  16  -1    3.53    1.42 
  16   1  -1    3.88    1.43 
   1 -16   1    2.15    1.14 
   1 -16   1    1.78    1.09 
  16   1   1    2.40    1.31 
  -1  16   1    3.64    1.44 
  -1  16   1    1.57    1.17 
  -1  16   1    3.60    1.43 
   0  16  -1   -0.75    1.04 
  16   0  -1   -0.88    1.07 
   0 -16  -1   -0.72    0.90 
   0  16  -1   -0.36    0.95 
   0  16  -1    0.35    1.00 
  16   0   1   -0.87    1.13 
   0 -16   1    0.53    1.08 
   0  16   1   -1.02    0.96 
   0  16   1   -0.60    0.92 
   0  16   1   -0.26    1.04 
   0 -16   1   -0.09    0.90 
   1  16  -1    3.60    1.37 
   1  16  -1    2.83    1.40 
   1  16  -1    3.70    1.43 
  -1 -16  -1    0.20    1.03 
  16  -1  -1    1.34    1.39 
   1  16   1   -0.26    1.08 
   1  16   1    5.84    1.54 
   1  16   1    2.63    1.26 
  -1 -16   1    2.35    1.25 
  16  -1   1    3.18    1.41 
   2  16  -1    8.97    1.92 
   2  16  -1    7.72    1.80 
   2  16  -1    8.41    1.96 
  16  -2  -1   13.16    2.25 
   2  16   1   11.78    2.08 
   2  16   1    7.14    1.76 
  16  -2   1    8.87    2.04 
   2  16   1   10.05    1.94 
  -2 -16   1   14.58    2.12 
   3  16  -1    6.60    1.70 
   3  16  -1    7.03    1.68 
   3  16  -1    6.88    1.69 
   3  16   1    5.33    1.54 
   3  16   1    3.81    1.37 
   3  16   1    6.11    1.70 
   4  16  -1    1.14    1.12 
   4  16  -1    1.06    1.09 
   4  16  -1   -0.67    0.87 
   4  16   1   -1.54    0.80 
   4  16   1    0.62    1.12 
   4  16   1   -0.11    0.87 
   5  16  -1    6.62    1.60 
   5  16  -1    6.82    1.55 
   5  16  -1    5.02    1.43 
   5  16   1    4.20    1.35 
   5  16   1    3.18    1.26 
   5  16   1    2.45    1.20 
  -1  17  -1    3.78    1.63 
  -1  17   1    1.56    1.39 
   1 -17   1    1.69    1.10 
   0  17   1   23.55    2.92 
   1  17  -1    1.54    1.31 
   1  17   1    2.39    1.37 
   2  17  -1    3.62    1.46 
   2  17   1    0.92    1.15 
   0   0  -2  183.14   12.10 
   0   0  -2  181.98   12.69 
   0   0  -2  201.28   11.72 
   0   0  -2  181.92   12.56 
   0   0  -2  209.41   13.39 
   0   0  -2  180.10   11.94 
   0   0   2  176.20   12.70 
   0   0   2  198.74   11.99 
   0   0   2  189.49   11.93 
   0   0   2  204.54   12.69 
   0   0   2  195.57   13.38 
   0   0   2  171.78   13.38 
   0   0   2  185.46   12.09 
  -1   0  -2    0.19    0.15 
   1   0  -2    0.07    0.19 
   0  -1  -2    0.06    0.14 
   0  -1  -2    0.59    0.21 
   0  -1  -2    0.27    0.18 
   1   0  -2    0.11    0.20 
   0  -1  -2    0.06    0.14 
   0   1  -2    0.02    0.19 
  -1   0  -2    0.25    0.11 
   0   1  -2    0.26    0.16 
  -1   0  -2    0.35    0.16 
   1   0  -2    0.29    0.20 
   0  -1  -2    0.19    0.18 
   0   1  -2   -0.06    0.15 
   1   0  -2    0.11    0.23 
  -1   0  -2    0.47    0.18 
   1   0  -2    0.20    0.20 
   0   1  -2    0.18    0.19 
  -1   0  -2    0.10    0.10 
   0   1  -2    0.15    0.19 
   0  -1  -2    0.12    0.18 
  -1   0  -2    0.55    0.19 
   1   0  -2    0.05    0.20 
   1   0  -2   -0.15    0.14 
   0  -1  -2    0.14    0.17 
   0   1  -2    1.21    0.24 
   0  -1  -2    0.62    0.17 
  -1   0  -2    0.10    0.10 
   0  -1  -2    0.45    0.17 
   1   0   2    0.76    0.18 
   0   1   2    0.14    0.15 
   1   0   2    0.29    0.16 
   0  -1   2    0.09    0.21 
   0   1   2    0.04    0.17 
   0   1   2    0.11    0.17 
   0  -1   2    0.17    0.19 
  -1   0   2    0.27    0.21 
   1   0   2    0.24    0.17 
   0  -1   2    0.10    0.19 
  -1   0   2    0.50    0.22 
   0  -1   2    0.37    0.19 
   0  -1   2   -0.03    0.18 
   1   0   2    0.24    0.15 
   0  -1   2    0.28    0.18 
  -1   0   2   -0.23    0.16 
   0   1   2    0.61    0.21 
   0   1   2    0.24    0.18 
   0  -1   2    1.07    0.24 
   1   0   2    0.02    0.15 
   1  -1  -2  330.14   25.49 
  -1  -1  -2  376.45   27.17 
   1   1  -2  355.85   25.54 
   1   1  -2  411.96   24.31 
  -1  -1  -2  406.28   25.75 
  -1   1  -2  380.54   27.19 
  -1   1  -2  371.69   23.78 
  -1   1  -2  366.13   27.18 
   1   1  -2  374.36   24.11 
  -1  -1  -2  379.05   25.51 
   1  -1  -2  385.45   24.33 
   1   1  -2  401.25   24.58 
  -1   1  -2  438.66   24.28 
   1   1  -2  345.57   27.19 
  -1   1  -2  432.88   23.83 
   1   1  -2  399.57   24.36 
  -1   1  -2  407.99   24.55 
   1  -1  -2  359.87   27.20 
  -1   1  -2  391.26   25.48 
  -1   1  -2  393.06   25.78 
   1   1  -2  350.93   27.20 
  -1  -1  -2  384.97   27.17 
  -1  -1  -2  355.47   24.52 
  -1  -1  -2  362.43   24.22 
   1  -1  -2  439.18   27.23 
  -1  -1  -2  411.94   27.17 
  -1  -1  -2  373.34   23.80 
  -1  -1  -2  415.25   23.81 
   1   1  -2  364.40   25.80 
   1  -1  -2  347.63   24.26 
  -1   1  -2  371.46   23.82 
   1   1   2  360.55   24.51 
   1   1   2  395.24   24.22 
  -1  -1   2  369.08   23.81 
   1  -1   2  373.39   24.22 
   1   1   2  379.16   24.29 
   1   1   2  384.41   27.16 
  -1   1   2  437.55   24.32 
   1   1   2  406.04   23.00 
   1  -1   2  346.70   24.72 
  -1  -1   2  368.72   23.85 
  -1  -1   2  376.14   24.58 
   1   1   2  402.71   24.54 
  -1  -1   2  373.34   24.28 
   1  -1   2  364.70   27.16 
   1   1   2  394.90   25.77 
   1   1   2  402.67   25.74 
   1  -1   2  391.26   27.18 
   1  -1   2  387.25   24.54 
   1  -1   2  374.77   24.29 
  -1   1   2  348.11   27.20 
  -1   1   2  417.15   25.82 
  -1  -1   2  433.54   27.23 
   1  -1   2  389.82   25.77 
   1  -1   2  399.97   24.55 
   1  -1   2  432.48   25.79 
  -1  -1   2  423.15   25.82 
  -1   2  -2  372.00   24.15 
   1  -2  -2  432.55   25.86 
   1  -2  -2  403.07   24.61 
  -1   2  -2  396.86   24.89 
   2   1  -2  394.08   24.67 
   1  -2  -2  407.12   24.67 
   1  -2  -2  423.05   26.15 
  -1   2  -2  407.30   26.18 
   2   1  -2  439.82   27.57 
  -1   2  -2  381.65   24.14 
   2   1  -2  419.45   24.82 
  -1   2  -2  381.02   24.61 
   2   1  -2  381.93   26.15 
  -2  -1  -2  368.80   27.48 
  -2  -1  -2  422.21   25.87 
   1  -2  -2  415.96   27.59 
   1  -2  -2  409.12   24.94 
   2   1  -2  374.46   25.91 
  -2  -1  -2  387.15   26.04 
  -2  -1  -2  374.22   24.81 
   2   1  -2  407.66   24.90 
   2   1  -2  396.36   24.59 
  -1   2  -2  370.62   27.55 
  -1   2  -2  337.71   27.55 
  -1   2  -2  372.13   24.11 
  -2  -1  -2  409.97   27.50 
   1  -2  -2  395.81   24.43 
   2   1  -2  376.22   27.56 
  -1   2  -2  436.24   25.82 
   2   1   2  411.85   24.82 
   2   1   2  373.76   27.61 
   1  -2   2  400.99   23.34 
  -1   2   2  389.57   27.60 
   1  -2   2  428.45   27.58 
  -1   2   2  366.16   26.17 
  -1   2   2  372.98   24.89 
   2   1   2  401.18   23.27 
  -2  -1   2  389.49   24.14 
   1  -2   2  374.06   27.55 
  -2  -1   2  387.35   24.90 
   2   1   2  363.13   24.55 
   1  -2   2  379.45   26.12 
   1  -2   2  384.74   25.08 
  -2  -1   2  365.23   24.15 
   1  -2   2  372.20   24.89 
   2   1   2  411.47   23.25 
  -2  -1   2  345.12   24.59 
   2   1   2  393.66   27.62 
  -2  -1   2  364.73   24.11 
   2   1   2  375.90   26.06 
   1  -2   2  401.68   24.57 
   2   1   2  352.42   24.57 
  -1   2   2  407.19   24.65 
   1  -2   2  381.06   24.37 
  -2  -1   2  417.19   27.59 
   0   2  -2  589.66   39.17 
   0  -2  -2  591.90   36.18 
   2   0  -2  565.41   36.90 
   0   2  -2  559.26   36.86 
   2   0  -2  586.64   36.83 
   0  -2  -2  539.61   37.26 
   0   2  -2  577.39   36.17 
   2   0  -2  595.71   37.21 
   2   0  -2  561.75   36.54 
   0  -2  -2  584.83   36.11 
  -2   0  -2  600.70   37.23 
   2   0  -2  580.91   38.75 
  -2   0  -2  574.91   41.31 
   0  -2  -2  584.53   36.17 
  -2   0  -2  597.65   41.26 
   2   0  -2  583.97   37.28 
  -2   0  -2  641.53   39.18 
   0   2  -2  629.55   37.29 
   0   2  -2  581.76   38.71 
   0  -2  -2  630.10   41.28 
   0  -2  -2  504.81   41.25 
   2   0  -2  556.19   41.24 
   0  -2  -2  598.52   39.11 
  -2   0  -2  602.52   38.67 
   0  -2  -2  588.85   38.70 
   0  -2  -2  583.67   36.82 
   2   0  -2  674.74   39.15 
   0  -2   2  566.15   36.57 
   2   0   2  590.77   36.84 
   0   2   2  505.50   41.25 
  -2   0   2  609.58   36.17 
   2   0   2  622.79   36.87 
   2   0   2  594.15   37.50 
   0  -2   2  626.75   37.29 
   0   2   2  547.21   37.24 
  -2   0   2  537.41   41.24 
   0   2   2  582.60   39.16 
   0  -2   2  575.95   41.30 
  -2   0   2  599.85   39.14 
   2   0   2  605.77   39.08 
   0   2   2  585.75   41.26 
   2   0   2  594.37   34.88 
   0  -2   2  591.22   39.14 
  -2   0   2  579.59   37.26 
   0  -2   2  568.81   41.28 
  -2   0   2  589.04   36.84 
   2   0   2  567.51   37.23 
   0   2   2  665.15   36.87 
  -1  -2  -2  385.39   24.59 
   1   2  -2  396.99   24.57 
  -1  -2  -2  340.24   27.19 
   2  -1  -2  379.23   27.24 
   2  -1  -2  404.24   25.84 
   1   2  -2  385.92   24.34 
   1   2  -2  374.06   25.60 
  -2   1  -2  378.89   23.83 
   2  -1  -2  402.14   24.12 
   2  -1  -2  362.27   27.25 
  -2   1  -2  403.49   27.20 
  -2   1  -2  420.92   24.55 
  -1  -2  -2  385.43   25.79 
   2  -1  -2  386.70   24.63 
  -1  -2  -2  368.15   23.84 
  -1  -2  -2  443.47   24.30 
  -1  -2  -2  383.94   27.23 
   1   2  -2  417.11   27.29 
  -2   1  -2  415.33   27.20 
   2  -1  -2  393.09   24.37 
  -2   1  -2  378.53   23.79 
   1   2  -2  368.54   24.62 
   1   2  -2  370.24   24.42 
  -2   1  -2  388.33   25.48 
   2  -1  -2  389.16   24.32 
  -1  -2  -2  368.46   23.80 
   1   2  -2  368.44   25.87 
  -1  -2  -2  399.86   23.85 
   2  -1  -2  335.92   25.54 
  -2   1  -2  401.26   23.83 
  -2   1  -2  406.80   25.78 
  -2   1  -2  418.70   24.26 
  -1  -2  -2  335.92   25.54 
   2  -1   2  382.37   23.00 
  -2   1   2  389.23   24.34 
  -1  -2   2  413.73   27.30 
  -2   1   2  370.90   23.85 
   2  -1   2  350.09   25.75 
  -2   1   2  370.99   24.59 
   2  -1   2  372.41   22.99 
   2  -1   2  401.13   24.79 
  -1  -2   2  370.12   23.85 
   1   2   2  379.38   23.05 
  -2   1   2  419.52   23.88 
  -1  -2   2  349.00   24.61 
  -2   1   2  419.69   23.84 
  -1  -2   2  429.24   25.88 
  -2   1   2  370.81   23.89 
   2  -1   2  346.36   27.15 
  -2   1   2  396.95   27.28 
  -2   1   2  358.21   27.23 
   2  -1   2  426.90   24.57 
   1   2   2  452.76   24.62 
   1   2   2  351.24   24.55 
  -2   1   2  355.22   25.84 
  -1  -2   2  401.78   24.34 
   1   2   2  366.62   27.19 
   1   2   2  378.06   24.36 
   2  -1   2  410.37   24.32 
   2  -1   2  346.96   27.15 
   1   2   2  412.27   24.28 
   1   2   2  420.35   24.11 
   1   2   2  389.86   25.84 
  -1  -2   2  370.08   23.89 
  -2   2  -2  176.42   11.15 
  -2   2  -2  160.39   12.47 
   2  -2  -2  162.84   11.33 
  -2  -2  -2  177.09   10.87 
   2  -2  -2  168.79   12.54 
  -2   2  -2  170.24   11.26 
  -2  -2  -2  198.23   11.27 
  -2   2  -2  181.11   10.91 
  -2   2  -2  167.19   10.90 
   2  -2  -2  175.11   11.05 
   2  -2  -2  170.48   11.87 
  -2  -2  -2  175.96   12.44 
   2   2  -2  178.14   11.19 
  -2   2  -2  193.86   12.51 
   2   2  -2  168.11   11.90 
   2   2  -2  158.67   11.16 
   2  -2  -2  174.32   12.52 
   2   2  -2  190.17   11.30 
   2   2  -2  161.78   11.30 
   2  -2  -2  182.09   11.17 
  -2  -2  -2  161.14   12.44 
   2   2  -2  158.08   12.49 
  -2  -2  -2  182.67   10.87 
   2   2  -2  189.55   12.54 
   2   2  -2  188.51   10.66 
  -2  -2  -2  174.72   11.08 
  -2   2  -2  181.18   10.92 
   2  -2  -2  170.58   11.71 
  -2  -2  -2  191.51   11.79 
   2  -2  -2  168.06   11.21 
  -2   2  -2  166.42   11.84 
  -2   2  -2  166.50   11.62 
  -2   2   2  183.37   12.55 
   2  -2   2  164.00   10.56 
   2   2   2  176.02   11.15 
  -2   2   2  177.91   12.57 
  -2   2   2  165.94   11.30 
   2  -2   2  164.74   10.80 
  -2   2   2  185.33   11.22 
   2  -2   2  189.82   11.21 
   2  -2   2  167.26   11.25 
  -2  -2   2  173.89   11.16 
   2  -2   2  183.86   11.07 
  -2   2   2  183.66   10.95 
   2   2   2  154.14   11.21 
   2   2   2  187.81   11.80 
  -2  -2   2  176.38   11.34 
   2   2   2  158.28   12.41 
  -2   2   2  183.40   11.00 
  -2  -2   2  173.18   11.87 
  -2   2   2  169.66   12.55 
   2   2   2  162.70   10.51 
  -2   2   2  183.54   10.97 
  -2   2   2  183.48   10.98 
  -2  -2   2  204.95   10.98 
   2  -2   2  187.83   12.48 
   2  -2   2  188.12   11.30 
   2   2   2  177.59   11.82 
  -2   2   2  189.28   11.95 
   2   2   2  169.12   11.24 
   2  -2   2  164.51   12.46 
   2  -2   2  191.96   11.85 
  -2  -2   2  205.30   10.99 
   2  -2   2  180.83   11.26 
  -2  -2   2  149.88   12.51 
  -2  -2   2  154.16   10.93 
  -2  -2   2  174.65   12.55 
   2   2   2  169.60   10.54 
   2  -2   2  174.71   11.42 
   2   2   2  171.16   12.41 
  -2   3  -2   20.73    1.89 
   2  -3  -2   24.18    1.81 
  -2   3  -2   20.49    1.63 
  -3  -2  -2   22.05    1.77 
  -3  -2  -2   23.88    1.65 
   2  -3  -2   23.72    1.84 
  -2   3  -2   25.55    1.75 
   3   2  -2   23.82    1.74 
   3   2  -2   25.59    1.69 
  -2   3  -2   20.49    1.63 
  -2   3  -2   24.10    1.86 
  -2   3  -2   23.77    1.67 
  -2   3  -2   22.22    1.90 
  -3  -2  -2   22.86    1.77 
   2  -3  -2   21.88    1.92 
  -3  -2  -2   26.20    1.56 
   2  -3  -2   23.44    1.98 
   3   2  -2   24.18    1.81 
  -3  -2  -2   20.90    1.60 
   2  -3  -2   24.27    1.72 
   3   2  -2   23.46    1.88 
   3   2  -2   23.12    1.87 
   2  -3  -2   23.58    1.77 
  -2   3  -2   24.50    1.74 
   2  -3  -2   26.45    1.70 
   3   2  -2   22.84    1.85 
   3   2  -2   21.54    1.65 
   2  -3  -2   23.32    1.67 
   2  -3  -2   23.65    1.70 
   2  -3   2   22.93    1.75 
  -2   3   2   25.62    1.77 
   3   2   2   23.33    1.59 
   3   2   2   24.69    1.63 
   3   2   2   21.69    1.49 
  -3  -2   2   22.49    1.79 
   2  -3   2   24.41    1.82 
   2  -3   2   19.42    1.67 
  -3  -2   2   21.37    1.74 
  -3  -2   2   21.60    1.63 
  -3  -2   2   24.28    1.65 
   2  -3   2   25.17    1.66 
  -3  -2   2   24.29    1.73 
   2  -3   2   25.65    1.82 
   2  -3   2   22.41    1.54 
  -3  -2   2   25.58    1.96 
   2  -3   2   25.09    1.93 
  -2   3   2   24.08    1.92 
  -3  -2   2   21.59    1.63 
   3   2   2   23.54    1.59 
   2  -3   2   21.06    1.63 
   3   2   2   22.83    1.71 
   2  -3   2   24.81    1.82 
   2  -3   2   23.12    1.89 
   3   2   2   22.42    1.51 
  -3  -2   2   23.62    1.94 
  -2   3   2   21.66    1.92 
   3   1  -2   11.89    0.99 
   1  -3  -2   11.80    1.03 
  -1   3  -2   12.31    1.06 
  -3  -1  -2   12.55    0.99 
  -1   3  -2   12.36    1.22 
   1  -3  -2   12.33    1.08 
  -1   3  -2   11.98    1.19 
   1  -3  -2   11.46    1.18 
   1  -3  -2   13.20    1.09 
  -1   3  -2   13.95    1.21 
  -3  -1  -2   14.19    0.90 
   3   1  -2   14.05    1.09 
   3   1  -2   12.08    1.13 
   1  -3  -2   10.88    1.00 
   3   1  -2   13.71    1.06 
  -1   3  -2   13.61    1.13 
   3   1  -2   12.57    1.14 
  -3  -1  -2   13.45    0.99 
   1  -3  -2   12.49    1.13 
  -1   3  -2   14.02    1.06 
   1  -3  -2   14.29    1.17 
   3   1  -2   11.75    1.19 
   1  -3  -2   11.77    1.21 
   3   1  -2   14.04    1.10 
   3   1  -2   14.56    1.17 
   1  -3  -2   11.81    1.08 
  -1   3  -2   11.08    1.06 
   1  -3   2   12.94    1.10 
   1  -3   2   12.52    1.00 
   1  -3   2   14.24    1.15 
   3   1   2   12.43    0.91 
  -3  -1   2   10.88    1.14 
   1  -3   2   12.82    1.21 
   1  -3   2   12.71    1.18 
  -3  -1   2   12.39    1.10 
   3   1   2   15.95    0.96 
   1  -3   2   13.30    1.14 
   1  -3   2   13.25    1.05 
   1  -3   2   14.05    1.08 
   3   1   2   13.31    0.88 
  -1   3   2   13.21    1.13 
   3   1   2   12.54    0.89 
   1  -3   2   12.43    1.12 
  -3  -1   2   13.15    1.07 
  -1   3   2   13.27    1.15 
  -1   3   2   13.07    1.08 
  -3  -1   2   16.21    1.03 
  -3  -1   2   14.34    1.02 
  -1   3   2   12.84    1.20 
  -3  -1   2   16.72    1.12 
  -3  -1   2   14.34    1.02 
  -3  -1   2   13.41    1.17 
   3   1   2   13.25    0.96 
   0  -3  -2    4.89    0.63 
   3   0  -2    5.25    0.61 
  -3   0  -2    5.89    0.45 
   0   3  -2    4.87    0.65 
   3   0  -2    5.79    0.62 
   3   0  -2    4.63    0.64 
   0  -3  -2    5.13    0.54 
   0  -3  -2    4.89    0.61 
   0   3  -2    4.96    0.60 
   0  -3  -2    5.87    0.62 
   0  -3  -2    5.34    0.58 
   3   0  -2    4.86    0.56 
   0   3  -2    4.19    0.64 
   0   3  -2    5.32    0.61 
   0  -3  -2    4.32    0.62 
   0  -3  -2    5.19    0.60 
   0   3  -2    5.57    0.57 
   0  -3  -2    5.57    0.68 
   3   0  -2    5.99    0.55 
   0  -3  -2    5.12    0.54 
   0   3  -2    4.84    0.68 
   3   0  -2    5.69    0.61 
   0  -3  -2    7.14    0.63 
   3   0  -2    5.55    0.58 
   3   0  -2    4.58    0.58 
  -3   0  -2    7.30    0.60 
  -3   0  -2    5.74    0.44 
   0  -3  -2    6.64    0.52 
   3   0   2    5.19    0.42 
  -3   0   2    4.95    0.52 
   0   3   2    4.81    0.65 
   3   0   2    5.80    0.44 
   0   3   2    5.07    0.65 
  -3   0   2    5.18    0.56 
  -3   0   2    3.91    0.58 
   0   3   2    4.71    0.57 
   0  -3   2    6.38    0.67 
   0   3   2    4.44    0.61 
  -3   0   2    6.35    0.54 
   0  -3   2    4.91    0.55 
  -3   0   2    5.26    0.65 
   3   0   2    5.37    0.43 
   0   3   2    5.82    0.65 
   0  -3   2    6.10    0.67 
   0  -3   2    5.05    0.65 
   0  -3   2    6.40    0.59 
  -3   0   2    4.96    0.52 
   0  -3   2    4.92    0.63 
   0   3   2    5.00    0.59 
   0  -3   2    6.02    0.70 
   0  -3   2    4.88    0.63 
  -3   0   2    5.58    0.61 
   3   0   2    5.10    0.42 
  -3   0   2    4.16    0.54 
  -1  -3  -2   14.99    1.02 
   1   3  -2   14.74    1.25 
  -1  -3  -2   12.14    1.13 
  -1  -3  -2   12.34    1.03 
  -1  -3  -2   12.97    1.17 
   1   3  -2   12.73    1.11 
  -3   1  -2   14.35    0.96 
   1   3  -2   13.34    1.18 
   3  -1  -2   12.71    1.12 
   3  -1  -2   12.86    0.91 
   3  -1  -2   12.57    1.16 
   3  -1  -2   13.16    1.09 
   3  -1  -2   11.57    1.06 
  -1  -3  -2   13.05    1.19 
   1   3  -2   14.75    1.07 
   1   3  -2   13.36    1.24 
  -3   1  -2   11.93    1.00 
  -1  -3  -2   13.50    1.10 
  -1  -3  -2   13.82    1.14 
   1   3  -2   13.99    1.12 
  -3   1  -2   11.94    0.97 
   3  -1  -2   13.14    1.02 
   3  -1  -2   12.71    1.15 
  -1  -3  -2   12.65    1.09 
   1   3  -2   15.11    1.24 
  -1  -3  -2   14.99    1.02 
  -1  -3  -2   14.25    0.94 
  -1  -3  -2   12.85    1.01 
  -3   1  -2   12.44    1.05 
  -3   1  -2   12.17    1.04 
   3  -1  -2   12.37    1.13 
   3  -1  -2   14.21    1.06 
  -3   1   2   13.52    1.06 
   1   3   2   11.67    1.04 
  -1  -3   2   12.27    1.10 
   3  -1   2   11.93    0.97 
   3  -1   2   12.93    0.90 
   1   3   2   11.72    1.13 
  -1  -3   2   13.67    1.05 
  -3   1   2   15.19    1.05 
   1   3   2   10.70    1.00 
  -3   1   2   12.81    1.20 
  -3   1   2   12.84    1.16 
  -3   1   2   13.43    1.08 
   1   3   2   14.27    1.17 
   1   3   2   13.25    1.06 
   1   3   2   14.09    1.19 
  -1  -3   2   10.12    1.16 
  -1  -3   2   13.68    1.05 
  -3   1   2   13.70    1.00 
   3  -1   2   12.34    0.88 
  -1  -3   2    9.84    1.04 
  -3   1   2   13.70    1.00 
   3  -1   2   14.45    1.00 
   1   3   2   12.80    1.10 
  -1  -3   2   14.73    1.13 
  -3   1   2   15.18    1.05 
   3  -1   2   12.95    0.95 
   3  -1   2   12.06    1.09 
  -1  -3   2   13.29    1.08 
  -3   1   2   12.02    1.14 
   2   3  -2   24.48    1.65 
  -2  -3  -2   23.78    1.75 
  -3   2  -2   23.31    1.79 
   3  -2  -2   26.23    1.73 
   2   3  -2   25.10    1.75 
   2   3  -2   26.50    2.01 
   3  -2  -2   24.86    1.88 
   3  -2  -2   22.81    1.80 
   2   3  -2   25.43    1.89 
   3  -2  -2   22.57    1.96 
  -2  -3  -2   21.43    1.62 
  -2  -3  -2   23.51    1.79 
  -2  -3  -2   23.21    1.90 
  -3   2  -2   26.60    1.63 
  -3   2  -2   22.95    1.88 
  -2  -3  -2   21.17    1.91 
  -3   2  -2   24.41    1.61 
  -3   2  -2   24.06    1.69 
   3  -2  -2   25.00    1.63 
   3  -2  -2   22.78    1.93 
  -2  -3  -2   25.59    1.69 
   3  -2  -2   24.61    1.78 
   3  -2  -2   22.73    1.72 
   2   3  -2   23.61    1.79 
  -3   2  -2   24.40    1.61 
   2   3  -2   25.39    1.96 
  -3   2  -2   22.06    1.64 
  -3   2  -2   24.48    1.69 
   3  -2  -2   25.42    1.83 
  -3   2  -2   23.86    1.90 
  -2  -3  -2   21.43    1.62 
   2   3  -2   26.08    1.78 
  -2  -3  -2   22.43    1.77 
   2   3  -2   22.32    1.95 
  -2  -3  -2   24.70    1.66 
   2   3   2   22.34    1.74 
  -2  -3   2   20.69    1.95 
  -3   2   2   28.51    1.74 
  -3   2   2   24.21    1.68 
  -2  -3   2   25.23    1.73 
   3  -2   2   23.74    1.59 
  -2  -3   2   22.47    1.71 
  -2  -3   2   19.89    1.79 
  -2  -3   2   23.30    1.77 
   3  -2   2   23.94    1.83 
  -2  -3   2   22.81    1.72 
  -3   2   2   19.55    1.91 
  -3   2   2   23.69    1.77 
   2   3   2   25.45    1.89 
  -3   2   2   24.23    1.69 
   2   3   2   25.05    1.65 
   3  -2   2   24.61    1.71 
   3  -2   2   27.73    1.85 
   3  -2   2   22.40    1.70 
   3  -2   2   22.17    1.82 
   2   3   2   26.17    1.65 
   3  -2   2   24.42    1.84 
  -2  -3   2   22.76    1.87 
  -2  -3   2   22.49    1.70 
   3  -2   2   23.66    1.68 
   3  -2   2   24.27    1.72 
  -3   2   2   20.35    1.95 
   3  -2   2   22.22    1.59 
   2   3   2   24.85    1.66 
   2   3   2   21.84    1.74 
  -3   2   2   24.46    1.99 
   2   3   2   23.90    1.90 
  -3   2   2   28.57    1.74 
   2   3   2   24.45    1.87 
   3  -2   2   24.16    1.78 
  -3   2   2   21.93    1.88 
   2   3   2   24.69    1.72 
  -3   2   2   24.43    1.79 
  -2  -3   2   25.72    2.04 
  -3   3  -2  462.97   30.82 
   3  -3  -2  494.85   34.54 
  -3  -3  -2  516.30   34.45 
   3  -3  -2  473.83   31.00 
  -3  -3  -2  466.78   32.60 
  -3  -3  -2  471.14   30.11 
   3  -3  -2  458.19   31.22 
   3  -3  -2  555.53   29.31 
   3  -3  -2  429.56   34.53 
   3   3  -2  534.59   29.27 
   3  -3  -2  488.16   32.75 
  -3  -3  -2  479.70   30.16 
  -3   3  -2  503.80   30.19 
  -3   3  -2  496.61   30.22 
   3   3  -2  450.29   34.50 
  -3   3  -2  526.33   31.16 
   3  -3  -2  463.80   30.53 
  -3  -3  -2  489.50   29.82 
  -3   3  -2  451.54   34.47 
  -3  -3  -2  494.12   31.12 
   3  -3  -2  501.81   29.72 
   3  -3  -2  482.76   32.34 
   3   3  -2  499.44   30.81 
   3   3  -2  469.60   32.79 
   3   3  -2  536.44   31.22 
   3  -3  -2  503.05   30.81 
  -3   3  -2  465.96   34.51 
   3   3  -2  497.86   30.96 
  -3   3  -2  506.45   32.76 
   3   3  -2  533.01   34.55 
  -3  -3  -2  453.15   34.44 
  -3  -3  -2  516.34   30.73 
  -3   3  -2  503.71   30.24 
  -3  -3  -2  470.85   30.16 
  -3   3   2  469.09   31.18 
   3   3   2  523.93   31.10 
  -3  -3   2  537.59   34.60 
  -3  -3   2  473.65   30.83 
   3   3   2  478.84   30.83 
  -3   3   2  459.71   30.20 
   3  -3   2  520.31   34.49 
   3   3   2  529.33   32.66 
  -3   3   2  463.39   30.25 
  -3  -3   2  447.67   30.25 
  -3   3   2  542.80   34.61 
  -3   3   2  463.12   30.30 
   3  -3   2  525.18   29.20 
   3  -3   2  555.41   30.92 
  -3  -3   2  521.13   31.24 
   3   3   2  504.51   34.40 
   3   3   2  450.11   29.13 
   3  -3   2  509.04   32.71 
   3  -3   2  554.54   30.70 
   3   3   2  430.18   32.66 
   3  -3   2  477.26   29.36 
  -3  -3   2  482.20   32.73 
   3   3   2  432.68   31.06 
  -3   3   2  565.05   30.94 
  -3  -3   2  496.26   29.73 
   3  -3   2  461.96   31.15 
   3   3   2  522.94   31.12 
   3   3   2  480.95   29.13 
  -3  -3   2  475.30   30.25 
   3  -3   2  492.21   29.78 
  -3   3   2  427.94   34.55 
   3   3   2  511.51   34.38 
  -3   3   2  459.78   30.25 
  -3   3   2  451.86   30.29 
  -3   3   2  487.11   32.81 
  -3  -3   2  448.31   30.20 
   3  -3   2  452.31   34.44 
   4   3  -2   58.69    4.40 
   3  -4  -2   56.51    3.88 
  -3   4  -2   57.57    4.49 
   4   3  -2   58.20    4.05 
  -4  -3  -2   63.74    4.05 
   4   3  -2   58.83    3.82 
   3  -4  -2   55.42    4.26 
   3  -4  -2   59.09    4.12 
  -4  -3  -2   62.83    3.74 
  -4  -3  -2   64.34    3.75 
   3  -4  -2   59.43    3.87 
  -4  -3  -2   61.13    3.93 
  -4  -3  -2   53.97    3.91 
  -3   4  -2   63.83    4.55 
  -3   4  -2   54.07    3.89 
   4   3  -2   58.04    4.28 
   4   3  -2   64.81    3.84 
  -3   4  -2   53.93    3.90 
   3  -4  -2   66.01    4.54 
  -4  -3  -2   62.81    3.75 
   3  -4  -2   55.52    3.87 
   3  -4  -2   54.71    3.96 
  -3   4  -2   58.19    4.04 
  -4  -3  -2   60.58    4.33 
   4   3  -2   57.58    4.09 
   4   3  -2   61.64    3.88 
  -3   4  -2   57.34    4.30 
  -4  -3  -2   50.08    4.32 
   3  -4  -2   53.67    4.53 
  -3   4  -2   57.66    4.04 
   4   3  -2   55.49    4.40 
   4   3  -2   55.71    4.02 
  -3   4  -2   62.41    4.01 
  -4  -3  -2   55.13    3.84 
   3  -4  -2   57.97    4.14 
  -3   4  -2   59.67    3.90 
   3  -4  -2   59.79    3.89 
  -4  -3   2   55.25    3.80 
   4   3   2   60.16    4.10 
  -3   4   2   49.57    4.29 
   4   3   2   62.69    3.90 
  -4  -3   2   60.91    3.89 
  -3   4   2   60.21    3.98 
   4   3   2   60.58    3.92 
   3  -4   2   51.16    4.43 
   3  -4   2   57.46    3.88 
   3  -4   2   60.18    4.17 
  -4  -3   2   59.66    3.88 
   3  -4   2   53.23    4.05 
   4   3   2   59.68    3.65 
  -4  -3   2   55.57    4.20 
  -4  -3   2   68.95    4.58 
   3  -4   2   59.06    3.84 
   4   3   2   57.18    4.08 
  -3   4   2   57.25    4.08 
   4   3   2   55.08    3.65 
   3  -4   2   59.36    3.81 
  -4  -3   2   66.77    4.54 
   3  -4   2   58.40    4.44 
   3  -4   2   58.03    4.24 
  -3   4   2   58.05    4.53 
   3  -4   2   53.90    3.90 
   4   3   2   59.28    4.15 
  -4  -3   2   61.17    4.08 
  -4  -3   2   60.90    3.90 
  -3   4   2   57.96    4.08 
  -4  -3   2   65.96    4.01 
  -2   4  -2    5.12    0.71 
   2  -4  -2    4.86    0.70 
   4   2  -2    3.85    0.56 
   2  -4  -2    4.36    0.67 
  -2   4  -2    4.98    0.64 
  -4  -2  -2    5.82    0.48 
   4   2  -2    2.75    0.57 
   4   2  -2    4.11    0.56 
  -2   4  -2    3.82    0.55 
  -2   4  -2    3.62    0.54 
   2  -4  -2    3.03    0.65 
   2  -4  -2    3.99    0.54 
   2  -4  -2    3.46    0.52 
   4   2  -2    4.64    0.58 
   2  -4  -2    4.95    0.67 
   4   2  -2    3.66    0.43 
   2  -4  -2    3.96    0.53 
  -2   4  -2    4.53    0.54 
  -4  -2  -2    3.51    0.59 
  -2   4  -2    4.45    0.66 
  -4  -2  -2    3.72    0.45 
   2  -4  -2    3.56    0.55 
   2  -4  -2    4.69    0.65 
  -2   4  -2    3.63    0.54 
  -4  -2  -2    4.01    0.41 
  -2   4  -2    4.44    0.60 
   2  -4  -2    4.45    0.70 
   4   2  -2    4.61    0.63 
   2  -4  -2    3.45    0.55 
   2  -4  -2    3.97    0.60 
   4   2  -2    4.79    0.58 
  -2   4  -2    3.53    0.62 
   4   2  -2    4.55    0.61 
   4   2  -2    3.82    0.56 
   2  -4   2    2.93    0.62 
  -2   4   2    3.43    0.66 
   4   2   2    3.51    0.35 
  -4  -2   2    3.81    0.48 
  -4  -2   2    4.45    0.51 
   2  -4   2    3.66    0.52 
  -4  -2   2    2.63    0.56 
   2  -4   2    3.60    0.61 
   2  -4   2    4.21    0.47 
   2  -4   2    5.12    0.65 
   4   2   2    4.48    0.42 
   2  -4   2    3.88    0.63 
  -4  -2   2    3.29    0.60 
  -2   4   2    5.02    0.65 
  -4  -2   2    4.21    0.55 
  -4  -2   2    5.76    0.62 
   4   2   2    3.86    0.43 
  -2   4   2    5.18    0.64 
   4   2   2    4.20    0.39 
  -2   4   2    3.28    0.60 
   2  -4   2    4.26    0.65 
  -4  -2   2    5.44    0.61 
  -4  -2   2    3.80    0.48 
  -2   4   2    4.23    0.71 
   2  -4   2    4.43    0.59 
   2  -4   2    4.36    0.64 
   4   2   2    4.03    0.44 
  -2   4   2    4.11    0.69 
  -1   4  -2   49.57    3.33 
  -1   4  -2   41.68    3.69 
   1  -4  -2   50.42    3.51 
  -4  -1  -2   46.92    3.40 
  -1   4  -2   45.36    3.68 
   1  -4  -2   48.99    3.70 
   4   1  -2   49.41    3.28 
   4   1  -2   44.79    3.07 
   1  -4  -2   47.94    3.27 
   4   1  -2   51.48    3.48 
  -1   4  -2   45.93    3.56 
   1  -4  -2   48.50    3.25 
   1  -4  -2   46.79    3.72 
  -1   4  -2   49.04    3.22 
   1  -4  -2   48.60    3.39 
  -1   4  -2   49.65    3.35 
   4   1  -2   49.58    3.10 
   1  -4  -2   48.90    3.25 
   4   1  -2   48.32    3.29 
   4   1  -2   48.90    3.11 
   4   1  -2   49.23    3.30 
   4   1  -2   46.51    3.27 
   1  -4  -2   46.02    3.38 
  -1   4  -2   47.15    3.29 
   1  -4  -2   44.46    3.20 
   4   1  -2   52.33    3.57 
   4   1  -2   52.79    3.58 
   1  -4   2   49.60    3.38 
   1  -4   2   47.95    3.38 
   1  -4   2   46.62    3.49 
  -1   4   2   49.24    3.34 
  -1   4   2   40.39    3.28 
  -4  -1   2   49.24    3.14 
  -1   4   2   50.03    3.40 
   1  -4   2   44.65    3.66 
  -1   4   2   47.41    3.68 
   1  -4   2   46.59    3.24 
  -1   4   2   40.39    3.52 
  -4  -1   2   52.59    3.30 
  -4  -1   2   45.88    3.62 
   1  -4   2   50.19    3.50 
   1  -4   2   42.70    3.64 
  -4  -1   2   49.27    3.14 
  -1   4   2   45.30    3.71 
   1  -4   2   43.61    3.24 
  -4  -1   2   49.32    3.43 
  -4  -1   2   46.40    3.11 
  -4  -1   2   44.55    3.61 
   1  -4   2   46.13    3.17 
  -4  -1   2   49.89    3.23 
   0  -4  -2  289.76   21.51 
   4   0  -2  309.89   20.35 
   4   0  -2  311.47   19.24 
   0  -4  -2  339.56   21.59 
   0   4  -2  298.49   21.56 
   0   4  -2  283.61   19.42 
   4   0  -2  305.12   21.40 
   4   0  -2  305.72   21.42 
   4   0  -2  324.92   19.39 
   0  -4  -2  325.62   18.64 
   0  -4  -2  300.67   20.39 
   0   4  -2  288.51   19.33 
   0   4  -2  310.14   19.26 
   4   0  -2  281.25   19.36 
   4   0  -2  296.10   18.17 
   0  -4  -2  312.05   19.43 
   4   0  -2  312.57   19.05 
   0   4  -2  303.48   20.50 
   4   0  -2  305.79   18.17 
   0  -4  -2  289.04   19.18 
   0  -4  -2  275.64   19.00 
   0  -4  -2  313.82   18.84 
   0  -4  -2  314.92   20.17 
   0  -4  -2  313.79   18.81 
   0  -4  -2  298.83   19.48 
   4   0  -2  298.27   19.20 
   4   0  -2  281.70   20.19 
   0   4  -2  306.00   19.40 
  -4   0   2  290.24   18.75 
   0  -4   2  352.16   19.63 
   0   4   2  351.28   18.30 
   0  -4   2  297.03   21.57 
  -4   0   2  304.78   19.15 
   0  -4   2  302.16   20.41 
   0  -4   2  341.36   20.43 
  -4   0   2  301.51   18.76 
  -4   0   2  306.63   20.34 
   0   4   2  292.40   19.30 
   0  -4   2  295.39   21.52 
   0   4   2  271.98   19.40 
  -4   0   2  307.82   19.35 
   0   4   2  287.56   21.53 
   0  -4   2  294.64   19.17 
   0  -4   2  266.42   19.44 
   0   4   2  264.97   19.19 
  -4   0   2  296.47   21.44 
   0   4   2  326.04   20.50 
   0   4   2  315.20   21.52 
  -4   0   2  273.26   21.46 
   0  -4   2  303.10   19.03 
   0  -4   2  318.50   18.62 
  -4   0   2  290.03   18.78 
   1   4  -2   43.55    3.27 
  -1  -4  -2   45.34    3.25 
  -1  -4  -2   43.44    3.25 
   4  -1  -2   45.60    3.45 
   1   4  -2   45.06    3.60 
   1   4  -2   50.11    3.39 
  -1  -4  -2   53.22    3.21 
  -4   1  -2   48.31    3.13 
   4  -1  -2   43.72    3.10 
  -4   1  -2   46.24    3.48 
   4  -1  -2   49.89    3.17 
   1   4  -2   55.11    3.38 
   4  -1  -2   41.73    3.25 
  -4   1  -2   49.77    3.32 
   1   4  -2   52.65    3.45 
   4  -1  -2   54.41    3.66 
   4  -1  -2   45.47    3.30 
  -1  -4  -2   43.74    3.18 
  -1  -4  -2   49.66    3.22 
   4  -1  -2   52.22    3.14 
  -1  -4  -2   46.77    3.47 
  -1  -4  -2   46.15    3.36 
   4  -1  -2   47.42    3.46 
  -4   1  -2   49.45    3.48 
   4  -1  -2   49.90    3.32 
  -1  -4  -2   43.79    3.17 
   1   4  -2   52.39    3.79 
   4  -1  -2   50.54    3.60 
   1   4  -2   47.74    3.71 
   1   4   2   46.12    3.27 
   4  -1   2   48.27    3.13 
  -1  -4   2   45.73    3.39 
  -4   1   2   55.06    3.22 
   4  -1   2   44.70    3.19 
  -1  -4   2   48.57    3.24 
   4  -1   2   50.93    3.30 
   1   4   2   43.77    3.66 
  -4   1   2   50.50    3.16 
  -4   1   2   46.03    3.48 
  -4   1   2   46.65    3.19 
  -4   1   2   42.63    3.62 
  -1  -4   2   50.96    3.27 
  -1  -4   2   55.41    3.28 
  -1  -4   2   55.33    3.29 
   4  -1   2   49.81    3.11 
   1   4   2   46.26    3.65 
  -1  -4   2   40.77    3.47 
   4  -1   2   44.37    2.92 
  -4   1   2   55.09    3.22 
  -1  -4   2   49.29    3.73 
   1   4   2   48.71    3.57 
  -4   1   2   44.33    3.65 
   4  -1   2   46.79    2.92 
  -4   1   2   44.78    3.26 
   4  -1   2   47.29    3.13 
   1   4   2   45.79    3.36 
  -4   1   2   47.11    3.27 
  -1  -4   2   48.57    3.29 
   1   4   2   45.96    3.31 
  -4   1   2   50.54    3.16 
   1   4   2   45.98    3.16 
  -4   2  -2    5.18    0.55 
   4  -2  -2    4.28    0.59 
   2   4  -2    4.58    0.66 
   2   4  -2    3.55    0.62 
   2   4  -2    4.71    0.63 
  -2  -4  -2    3.78    0.49 
   2   4  -2    3.51    0.64 
   2   4  -2    4.69    0.63 
  -4   2  -2    4.03    0.41 
   4  -2  -2    3.49    0.47 
   4  -2  -2    4.34    0.62 
  -2  -4  -2    3.71    0.62 
   2   4  -2    5.35    0.75 
  -2  -4  -2    4.39    0.55 
  -2  -4  -2    3.78    0.48 
  -2  -4  -2    4.21    0.56 
  -2  -4  -2    3.85    0.60 
  -4   2  -2    3.87    0.45 
   4  -2  -2    5.90    0.64 
   4  -2  -2    3.78    0.57 
   2   4  -2    3.15    0.66 
   4  -2  -2    5.03    0.61 
  -2  -4  -2    4.48    0.53 
  -4   2  -2    2.86    0.49 
  -4   2  -2    4.47    0.48 
  -2  -4  -2    3.31    0.63 
   4  -2  -2    4.39    0.56 
  -2  -4  -2    3.31    0.57 
   4  -2  -2    4.17    0.60 
  -4   2  -2    5.68    0.51 
   4  -2  -2    3.99    0.60 
  -4   2  -2    3.29    0.38 
  -4   2  -2    3.88    0.40 
  -4   2  -2    3.88    0.40 
  -2  -4   2    4.48    0.56 
  -2  -4   2    3.69    0.62 
  -2  -4   2    3.72    0.60 
   4  -2   2    4.36    0.66 
  -4   2   2    3.93    0.60 
   4  -2   2    3.85    0.61 
  -2  -4   2    3.35    0.65 
  -4   2   2    3.18    0.46 
   2   4   2    5.26    0.59 
   2   4   2    4.93    0.66 
   4  -2   2    4.35    0.41 
   2   4   2    3.92    0.65 
   4  -2   2    4.90    0.43 
   4  -2   2    3.68    0.50 
  -4   2   2    3.81    0.64 
  -2  -4   2    3.06    0.55 
  -2  -4   2    4.48    0.57 
   4  -2   2    4.11    0.44 
  -4   2   2    3.17    0.46 
  -2  -4   2    4.13    0.60 
  -4   2   2    3.66    0.50 
  -4   2   2    4.65    0.67 
  -2  -4   2    3.57    0.60 
   2   4   2    4.20    0.61 
  -4   2   2    5.14    0.59 
  -2  -4   2    4.03    0.56 
   2   4   2    2.55    0.50 
   4  -2   2    4.38    0.49 
   2   4   2    4.46    0.56 
   4  -2   2    3.47    0.44 
   4  -2   2    5.34    0.56 
  -2  -4   2    4.08    0.72 
   2   4   2    4.31    0.52 
  -4   2   2    4.19    0.59 
   4  -2   2    3.74    0.47 
  -4   2   2    4.34    0.56 
  -4   2   2    5.35    0.65 
  -4   2   2    4.34    0.55 
   2   4   2    3.93    0.57 
   3   4  -2   62.55    3.96 
  -3  -4  -2   59.38    3.89 
  -3  -4  -2   58.38    4.22 
   4  -3  -2   53.09    4.07 
   3   4  -2   62.04    3.97 
  -3  -4  -2   59.31    3.88 
   3   4  -2   64.67    4.60 
  -4   3  -2   57.49    3.89 
   4  -3  -2   57.13    3.90 
  -3  -4  -2   60.13    4.02 
   4  -3  -2   53.74    3.83 
  -3  -4  -2   56.83    3.98 
   3   4  -2   68.66    4.60 
  -4   3  -2   54.89    4.02 
   4  -3  -2   59.12    4.20 
   4  -3  -2   55.86    4.54 
   4  -3  -2   62.83    4.18 
   3   4  -2   62.30    4.45 
  -4   3  -2   56.42    4.49 
   4  -3  -2   60.14    4.02 
  -3  -4  -2   52.35    4.48 
   3   4  -2   58.19    4.04 
  -4   3  -2   67.53    4.30 
   4  -3  -2   58.88    3.80 
   4  -3  -2   58.29    3.79 
   4  -3  -2   58.59    4.32 
  -3  -4  -2   64.93    4.51 
  -3  -4  -2   57.35    3.90 
   4  -3  -2   66.95    4.56 
  -4   3  -2   62.38    4.05 
   4  -3  -2   66.24    3.96 
   3   4  -2   53.96    4.11 
  -4   3  -2   54.38    4.46 
  -3  -4  -2   63.86    4.12 
  -4   3  -2   57.52    3.89 
   3   4  -2   59.99    4.20 
  -4   3  -2   52.65    3.89 
   4  -3   2   60.25    4.04 
  -3  -4   2   55.96    4.57 
  -4   3   2   62.25    4.12 
   4  -3   2   58.66    3.93 
   3   4   2   55.73    4.03 
  -4   3   2   61.52    4.02 
  -4   3   2   59.97    3.95 
  -4   3   2   59.96    3.96 
   3   4   2   58.80    3.84 
  -4   3   2   56.19    4.11 
  -3  -4   2   67.46    4.22 
   4  -3   2   58.91    4.06 
  -3  -4   2   55.80    3.93 
   3   4   2   60.25    3.83 
   4  -3   2   62.88    4.43 
   4  -3   2   65.60    4.25 
  -4   3   2   57.64    4.37 
  -3  -4   2   57.86    4.09 
   3   4   2   58.70    4.43 
   4  -3   2   63.91    3.81 
   4  -3   2   60.21    4.24 
   4  -3   2   65.41    3.82 
  -4   3   2   61.49    4.03 
  -4   3   2   63.75    4.09 
   3   4   2   59.59    4.09 
  -3  -4   2   58.65    3.99 
  -4   3   2   53.54    4.53 
  -3  -4   2   59.10    3.98 
  -3  -4   2   59.16    3.98 
  -3  -4   2   60.68    4.33 
   4  -3   2   64.52    4.09 
   4  -3   2   60.89    4.41 
  -4   3   2   60.81    4.61 
   4  -3   2   55.14    3.96 
  -3  -4   2   60.39    4.04 
   3   4   2   66.40    4.50 
  -3  -4   2   58.70    4.65 
   3   4   2   61.09    4.34 
   3   4   2   64.92    3.83 
  -4   4  -2  302.15   21.74 
  -4  -4  -2  329.76   21.58 
  -4   4  -2  330.36   20.07 
  -4   4  -2  327.46   20.06 
   4   4  -2  377.74   22.95 
   4   4  -2  326.23   19.49 
  -4   4  -2  354.71   20.71 
   4  -4  -2  334.24   21.40 
  -4   4  -2  314.57   22.95 
   4  -4  -2  325.88   20.42 
  -4   4  -2  343.73   20.61 
  -4  -4  -2  317.86   19.99 
   4  -4  -2  352.60   19.51 
   4  -4  -2  326.65   19.69 
   4  -4  -2  304.95   19.14 
   4   4  -2  330.88   21.85 
   4   4  -2  289.55   20.57 
  -4  -4  -2  301.97   19.92 
  -4   4  -2  326.88   20.09 
  -4  -4  -2  349.70   20.66 
   4   4  -2  320.90   19.71 
  -4  -4  -2  302.34   19.96 
   4  -4  -2  280.00   21.73 
   4   4  -2  340.91   19.59 
   4  -4  -2  333.26   19.56 
   4  -4  -2  307.05   20.15 
  -4   4  -2  295.52   22.88 
   4  -4  -2  310.06   22.93 
   4   4  -2  346.46   19.60 
   4   4  -2  354.56   20.76 
   4  -4  -2  345.07   19.76 
  -4  -4  -2  325.35   22.87 
   4  -4  -2  323.01   23.00 
  -4  -4  -2  309.43   20.35 
  -4  -4  -2  294.76   19.80 
   4   4  -2  343.30   22.95 
   4   4  -2  308.01   19.57 
  -4   4  -2  355.40   20.55 
   4   4  -2  292.11   20.37 
   4  -4  -2  329.79   20.81 
  -4  -4  -2  308.20   22.84 
  -4   4   2  300.83   20.54 
  -4   4   2  308.66   23.02 
   4  -4   2  315.05   19.60 
   4   4   2  291.24   20.58 
   4   4   2  319.36   21.72 
   4  -4   2  307.90   19.78 
   4  -4   2  350.70   22.90 
   4  -4   2  343.17   20.27 
   4  -4   2  302.03   19.39 
  -4  -4   2  323.14   23.02 
   4   4   2  371.05   20.52 
   4  -4   2  293.78   19.44 
  -4   4   2  314.16   20.74 
   4  -4   2  313.71   20.96 
   4   4   2  358.82   19.46 
   4  -4   2  329.93   20.73 
  -4  -4   2  346.18   19.77 
  -4  -4   2  339.34   20.50 
   4  -4   2  340.47   19.41 
  -4  -4   2  302.03   21.70 
  -4  -4   2  294.20   20.07 
  -4   4   2  322.06   21.85 
  -4  -4   2  296.57   20.73 
   4  -4   2  315.00   22.84 
   4   4   2  353.56   20.65 
   4   4   2  331.97   19.33 
  -4   4   2  300.24   20.08 
  -4  -4   2  303.57   20.09 
   4  -4   2  303.73   19.07 
  -4   4   2  300.51   20.05 
  -4  -4   2  303.92   20.05 
   4   4   2  325.45   19.33 
   4  -4   2  301.00   19.54 
   4  -4   2  372.62   21.76 
  -4   4   2  307.30   22.98 
  -4  -4   2  312.09   22.98 
  -4   4   2  319.61   20.15 
  -5  -4  -2   28.91    2.09 
   5   4  -2   30.46    2.23 
   5   4  -2   27.85    2.21 
  -4   5  -2   33.38    2.47 
   5   4  -2   33.19    2.47 
  -5  -4  -2   29.14    2.45 
   4  -5  -2   30.67    2.52 
   5   4  -2   28.03    2.32 
   5   4  -2   29.05    2.24 
  -4   5  -2   26.17    2.61 
   5   4  -2   30.15    2.53 
   4  -5  -2   33.84    2.36 
   4  -5  -2   30.62    2.29 
   5   4  -2   29.00    2.25 
   4  -5  -2   33.04    2.34 
   4  -5  -2   30.20    2.16 
  -5  -4  -2   29.96    2.49 
   4  -5  -2   27.78    2.28 
  -4   5  -2   29.99    2.36 
  -4   5  -2   35.39    2.33 
  -5  -4  -2   28.91    2.09 
  -4   5  -2   31.07    2.64 
   5   4  -2   32.43    2.28 
   4  -5  -2   33.30    2.73 
  -4   5  -2   31.60    2.29 
  -4   5  -2   35.42    2.33 
   4  -5  -2   30.87    2.27 
  -5  -4  -2   33.86    2.38 
   4  -5  -2   30.99    2.28 
   4  -5  -2   31.64    2.51 
  -4   5  -2   33.95    2.60 
  -5  -4  -2   29.35    2.13 
   4  -5  -2   30.11    2.26 
   5   4  -2   26.81    2.24 
  -5  -4  -2   30.75    2.19 
   4  -5  -2   32.27    2.64 
  -4   5  -2   31.91    2.34 
  -5  -4   2   36.64    2.27 
   5   4   2   31.34    2.08 
  -5  -4   2   32.72    2.67 
  -5  -4   2   33.27    2.43 
   4  -5   2   29.46    2.20 
   5   4   2   31.68    2.21 
  -5  -4   2   31.83    2.28 
  -4   5   2   29.25    2.59 
   4  -5   2   29.93    2.25 
  -4   5   2   27.34    2.37 
   4  -5   2   28.56    2.48 
  -4   5   2   27.40    2.64 
  -4   5   2   28.70    2.43 
   4  -5   2   26.28    2.22 
  -5  -4   2   29.88    2.35 
   4  -5   2   33.76    2.37 
   4  -5   2   32.50    2.59 
   5   4   2   28.82    2.25 
  -5  -4   2   34.19    2.45 
   5   4   2   31.15    2.07 
  -5  -4   2   32.13    2.41 
   4  -5   2   30.58    2.42 
   5   4   2   30.11    2.38 
   4  -5   2   24.54    2.16 
   4  -5   2   29.49    2.45 
   4  -5   2   30.25    2.17 
  -4   5   2   34.81    2.81 
   5   4   2   30.55    2.13 
  -5  -4   2   30.88    2.26 
   4  -5   2   30.34    2.19 
  -5  -4   2   30.93    2.26 
  -5  -4   2   32.99    2.70 
   3  -5  -2   62.10    5.18 
   3  -5  -2   63.45    4.73 
   5   3  -2   63.55    4.37 
   3  -5  -2   69.28    4.49 
   5   3  -2   67.92    4.69 
   5   3  -2   63.17    5.03 
  -3   5  -2   72.76    5.27 
   5   3  -2   73.54    4.66 
  -3   5  -2   71.80    4.55 
   3  -5  -2   67.88    4.94 
  -3   5  -2   78.30    5.26 
   3  -5  -2   77.88    5.35 
  -5  -3  -2   66.75    4.48 
   5   3  -2   60.33    4.35 
   5   3  -2   68.67    4.43 
   3  -5  -2   69.05    4.81 
   5   3  -2   65.76    4.63 
  -5  -3  -2   68.83    4.27 
   5   3  -2   69.43    4.92 
  -5  -3  -2   64.11    4.95 
  -5  -3  -2   73.68    4.43 
   5   3  -2   72.20    4.43 
  -3   5  -2   71.73    4.56 
  -3   5  -2   64.93    4.64 
  -3   5  -2   61.30    4.52 
  -3   5  -2   68.66    4.73 
  -5  -3  -2   69.16    4.28 
  -3   5  -2   68.38    4.70 
   3  -5  -2   73.75    4.53 
  -5  -3  -2   68.79    4.28 
   3  -5  -2   62.00    4.58 
  -3   5  -2   71.93    5.05 
   5   3  -2   64.22    4.35 
   3  -5  -2   67.83    4.51 
  -5  -3  -2   65.27    4.96 
   3  -5  -2   67.79    4.52 
   3  -5  -2   70.91    4.47 
   3  -5  -2   66.55    4.40 
  -5  -3   2   70.20    4.83 
  -5  -3   2   64.76    4.45 
  -3   5   2   67.46    4.73 
  -3   5   2   65.49    5.29 
   3  -5   2   72.83    5.24 
   3  -5   2   65.21    4.92 
   3  -5   2   70.30    4.81 
   5   3   2   68.62    4.74 
   5   3   2   66.69    4.44 
   3  -5   2   71.73    4.37 
   5   3   2   67.25    4.45 
   3  -5   2   63.23    5.13 
  -5  -3   2   69.98    4.36 
   5   3   2   65.53    4.47 
  -5  -3   2   71.06    4.49 
   3  -5   2   70.81    4.59 
  -5  -3   2   64.78    4.45 
  -5  -3   2   74.29    4.61 
   3  -5   2   57.77    4.37 
  -5  -3   2   70.69    4.65 
   3  -5   2   63.52    4.33 
  -3   5   2   68.89    5.07 
   5   3   2   72.96    4.17 
  -3   5   2   61.67    4.70 
   3  -5   2   68.26    4.42 
  -5  -3   2   71.73    5.20 
   3  -5   2   58.65    4.69 
  -5  -3   2   68.22    5.19 
   3  -5   2   69.75    4.54 
   3  -5   2   59.57    4.37 
  -3   5   2   68.84    5.25 
  -2   5  -2    2.43    0.52 
   2  -5  -2    1.82    0.55 
   5   2  -2    1.06    0.44 
   5   2  -2    1.64    0.37 
  -5  -2  -2    1.41    0.44 
  -5  -2  -2    0.90    0.26 
  -2   5  -2    0.79    0.48 
   5   2  -2    1.67    0.43 
  -5  -2  -2    1.27    0.26 
   2  -5  -2    1.18    0.51 
   5   2  -2    1.27    0.36 
   5   2  -2    1.33    0.45 
   2  -5  -2    1.32    0.50 
   5   2  -2    1.04    0.42 
   2  -5  -2    1.47    0.40 
   2  -5  -2    1.56    0.52 
   5   2  -2    1.82    0.44 
  -2   5  -2    1.53    0.54 
  -2   5  -2    1.64    0.56 
   2  -5  -2    3.49    0.53 
   5   2  -2    1.43    0.49 
   2  -5  -2    1.74    0.45 
  -2   5  -2    1.02    0.47 
   2  -5  -2    2.14    0.56 
   2  -5  -2    2.67    0.53 
  -2   5  -2    1.13    0.49 
   2  -5  -2    3.58    0.59 
   2  -5  -2    0.55    0.46 
  -5  -2   2    1.09    0.38 
  -5  -2   2    1.24    0.45 
  -5  -2   2    1.26    0.35 
  -5  -2   2    1.40    0.48 
   5   2   2    1.31    0.28 
   2  -5   2    3.02    0.61 
  -2   5   2    0.61    0.49 
  -5  -2   2    1.26    0.35 
  -2   5   2    1.21    0.44 
  -5  -2   2    1.18    0.42 
   2  -5   2    1.60    0.53 
   2  -5   2    1.37    0.51 
   2  -5   2    1.37    0.47 
  -2   5   2    1.94    0.58 
  -2   5   2    1.34    0.51 
  -5  -2   2    1.95    0.38 
  -5  -2   2    2.11    0.43 
   2  -5   2    1.12    0.47 
   5   2   2    1.24    0.26 
   2  -5   2    1.23    0.46 
  -2   5   2    1.09    0.50 
   5   2   2    1.83    0.25 
   2  -5   2    0.91    0.37 
   2  -5   2    1.09    0.40 
   2  -5   2    1.76    0.60 
   2  -5   2    0.56    0.39 
   1  -5  -2  244.22   14.99 
   1  -5  -2  231.97   16.10 
   1  -5  -2  240.52   15.34 
   5   1  -2  232.92   16.76 
  -1   5  -2  254.92   14.91 
   5   1  -2  235.49   14.29 
   5   1  -2  226.48   14.27 
   5   1  -2  240.58   16.78 
   1  -5  -2  251.65   17.07 
  -1   5  -2  232.14   17.02 
   5   1  -2  223.04   15.22 
  -1   5  -2  234.16   15.34 
  -1   5  -2  255.76   17.10 
   5   1  -2  226.06   15.11 
   5   1  -2  243.16   15.14 
   5   1  -2  264.27   15.27 
   5   1  -2  224.89   16.01 
   1  -5  -2  219.52   15.39 
   1  -5  -2  244.25   14.72 
   1  -5  -2  231.76   15.84 
   1  -5  -2  240.61   15.14 
  -1   5  -2  254.31   16.23 
  -5  -1   2  233.08   14.73 
   1  -5   2  219.99   14.54 
  -5  -1   2  212.87   16.85 
  -5  -1   2  233.41   14.75 
   1  -5   2  216.93   16.09 
   1  -5   2  262.88   17.03 
  -1   5   2  221.29   15.32 
   1  -5   2  214.61   14.68 
  -1   5   2  257.13   15.25 
  -5  -1   2  196.48   15.92 
  -5  -1   2  258.54   14.75 
  -5  -1   2  230.12   15.21 
   1  -5   2  255.36   17.05 
   1  -5   2  263.15   15.15 
  -1   5   2  227.74   16.97 
  -1   5   2  249.16   16.23 
   1  -5   2  241.41   15.47 
   1  -5   2  217.75   14.93 
  -5  -1   2  256.83   16.94 
   1  -5   2  231.93   14.42 
  -1   5   2  243.96   15.31 
  -1   5   2  227.56   17.03 
  -5  -1   2  234.18   15.06 
   0   5  -2    1.24    0.45 
   5   0  -2    1.10    0.38 
   5   0  -2    1.68    0.43 
   0  -5  -2    1.65    0.47 
   0  -5  -2    0.60    0.41 
   0   5  -2    1.07    0.51 
   5   0  -2    0.81    0.35 
   0  -5  -2    1.05    0.36 
   0  -5  -2    0.88    0.46 
   5   0  -2    0.86    0.30 
   5   0  -2    0.98    0.31 
   0   5  -2    0.84    0.51 
   0   5  -2    1.71    0.54 
   5   0  -2    0.91    0.39 
   0   5  -2    0.81    0.42 
   0  -5  -2    1.34    0.47 
   0  -5  -2    0.85    0.40 
   0   5  -2    1.03    0.46 
   0  -5  -2    1.22    0.49 
   5   0  -2    1.14    0.42 
   5   0  -2    0.93    0.36 
   5   0  -2    0.57    0.32 
   0  -5  -2    0.95    0.33 
   0  -5  -2    2.02    0.47 
   0  -5  -2    1.05    0.36 
   0  -5  -2    0.79    0.41 
   0   5  -2    0.71    0.40 
  -5   0   2    0.73    0.29 
   0  -5   2    0.32    0.38 
   0  -5   2    1.08    0.43 
   0   5   2    1.41    0.47 
   0   5   2    0.89    0.49 
  -5   0   2    1.37    0.36 
   0  -5   2    0.82    0.45 
  -5   0   2    0.75    0.36 
   0  -5   2    1.03    0.47 
   0  -5   2    1.49    0.47 
   0   5   2    0.31    0.35 
  -5   0   2    1.04    0.33 
  -5   0   2    1.04    0.38 
   0   5   2    0.58    0.41 
   0  -5   2    1.01    0.44 
   0   5   2    0.87    0.42 
  -5   0   2    1.04    0.33 
   0  -5   2    0.81    0.44 
  -5   0   2    0.62    0.36 
   5   0   2    0.19    0.45 
   0  -5   2    0.36    0.37 
   0   5   2    0.90    0.43 
  -5   0   2    0.59    0.31 
   0   5   2    0.99    0.47 
   1   5  -2  248.15   15.49 
  -1  -5  -2  210.38   17.05 
   1   5  -2  255.24   15.48 
  -1  -5  -2  238.45   14.94 
   1   5  -2  223.97   15.35 
  -1  -5  -2  224.17   15.48 
  -5   1  -2  223.82   16.83 
  -1  -5  -2  258.75   16.22 
   5  -1  -2  233.29   14.42 
   1   5  -2  233.42   17.12 
  -1  -5  -2  274.92   15.14 
  -1  -5  -2  266.85   15.40 
   5  -1  -2  232.99   16.14 
   5  -1  -2  234.42   16.95 
  -5   1  -2  208.94   16.81 
   1   5  -2  224.98   15.31 
  -1  -5  -2  222.78   15.22 
   1   5  -2  231.23   17.17 
  -1  -5  -2  251.54   14.99 
  -1  -5  -2  237.44   17.15 
   5  -1  -2  223.99   16.01 
   5  -1  -2  222.30   14.41 
   5  -1  -2  241.79   16.93 
   5  -1  -2  230.25   15.37 
  -1  -5  -2  231.66   14.84 
   5  -1  -2  240.19   15.25 
  -1  -5  -2  238.36   14.96 
   1   5  -2  254.54   14.79 
   5  -1  -2  263.30   15.29 
  -5   1   2  233.24   17.02 
  -5   1   2  253.54   15.24 
  -1  -5   2  216.44   14.76 
  -5   1   2  237.29   14.87 
  -5   1   2  237.44   14.84 
   5  -1   2  235.57   15.18 
  -5   1   2  222.29   15.32 
  -1  -5   2  225.99   15.50 
   5  -1   2  226.99   14.59 
  -1  -5   2  241.52   16.24 
  -1  -5   2  230.75   15.24 
  -5   1   2  274.49   17.11 
  -5   1   2  253.18   16.16 
   1   5   2  210.85   17.03 
  -5   1   2  230.48   15.20 
   5  -1   2  240.43   15.07 
   1   5   2  236.49   14.54 
  -5   1   2  258.70   14.91 
   5  -1   2  248.20   15.95 
   1   5   2  230.36   17.11 
  -1  -5   2  229.69   16.21 
  -5   1   2  258.80   14.94 
   1   5   2  268.54   14.63 
  -1  -5   2  226.03   15.56 
   1   5   2  232.62   16.29 
   5  -1   2  251.99   15.17 
   1   5   2  235.13   14.71 
   5  -1   2  244.17   15.97 
   1   5   2  245.35   15.27 
   1   5   2  256.52   15.42 
  -5   2  -2    1.91    0.38 
  -2  -5  -2    0.85    0.36 
   5  -2  -2    2.99    0.62 
  -2  -5  -2    1.86    0.51 
   2   5  -2    1.68    0.54 
   2   5  -2    1.24    0.45 
   2   5  -2    1.10    0.45 
   5  -2  -2    1.03    0.42 
  -5   2  -2    1.72    0.28 
   5  -2  -2    1.15    0.41 
  -5   2  -2    1.60    0.27 
  -5   2  -2    1.72    0.28 
  -2  -5  -2    1.63    0.44 
   5  -2  -2    0.95    0.45 
   5  -2  -2    1.68    0.45 
  -2  -5  -2    3.15    0.54 
   5  -2  -2    1.15    0.38 
  -2  -5  -2    0.76    0.35 
   2   5  -2    0.80    0.45 
  -5   2  -2    1.60    0.27 
   5  -2  -2    1.98    0.53 
  -2  -5  -2    1.56    0.57 
  -5   2  -2    1.69    0.36 
   5  -2  -2    2.63    0.49 
   2   5  -2    0.75    0.49 
  -2  -5  -2    0.94    0.38 
   2   5  -2    1.40    0.48 
   2   5  -2    1.20    0.53 
  -2  -5  -2    1.55    0.49 
  -5   2  -2    1.81    0.28 
   2   5  -2    0.95    0.47 
   5  -2  -2    2.09    0.32 
  -5   2  -2    1.97    0.36 
  -2  -5  -2    0.85    0.36 
   5  -2  -2    1.84    0.46 
   5  -2  -2    2.09    0.49 
  -5   2  -2    1.64    0.26 
   2   5  -2    1.33    0.56 
  -2  -5  -2    0.59    0.42 
  -5   2   2    0.81    0.46 
   2   5   2    1.72    0.46 
   2   5   2    1.26    0.45 
   2   5   2    1.53    0.51 
  -5   2   2    2.57    0.51 
   2   5   2    0.76    0.37 
  -2  -5   2    1.90    0.46 
  -5   2   2    0.83    0.32 
  -5   2   2    1.82    0.44 
  -2  -5   2    2.38    0.63 
   2   5   2    1.52    0.43 
   5  -2   2    1.96    0.40 
  -2  -5   2    1.41    0.51 
  -5   2   2    1.50    0.49 
  -5   2   2    1.82    0.44 
  -5   2   2    1.73    0.39 
  -5   2   2    1.65    0.47 
   2   5   2    1.28    0.50 
  -5   2   2    0.83    0.32 
   5  -2   2    1.82    0.58 
  -2  -5   2    1.91    0.46 
  -2  -5   2    2.02    0.50 
  -2  -5   2    0.60    0.43 
  -2  -5   2    1.75    0.55 
   2   5   2    1.24    0.46 
   5  -2   2    1.04    0.29 
  -2  -5   2    1.55    0.47 
   2   5   2    1.19    0.44 
   5  -2   2    1.28    0.34 
   5  -2   2    1.07    0.28 
   5  -2   2    1.49    0.32 
   2   5   2    1.23    0.42 
  -5   2   2    1.12    0.38 
   2   5   2    1.23    0.40 
   5  -2   2    1.05    0.30 
  -2  -5   2    2.65    0.55 
  -5   2   2    0.99    0.41 
  -2  -5   2    0.21    0.39 
   2   5   2    1.51    0.49 
   2   5   2    2.57    0.52 
  -3  -5  -2   57.90    4.44 
   5  -3  -2   63.45    4.31 
   5  -3  -2   69.75    4.70 
   3   5  -2   63.79    4.48 
   5  -3  -2   76.74    4.43 
   5  -3  -2   74.25    4.46 
   5  -3  -2   66.97    4.89 
   3   5  -2   60.48    4.66 
   3   5  -2   69.39    4.50 
  -5   3  -2   65.55    4.52 
   5  -3  -2   72.38    4.42 
   5  -3  -2   60.89    4.44 
   3   5  -2   63.35    4.59 
   5  -3  -2   70.62    5.15 
   5  -3  -2   69.97    4.40 
  -3  -5  -2   70.33    4.62 
  -3  -5  -2   67.15    4.82 
  -5   3  -2   72.31    4.40 
   5  -3  -2   68.08    4.64 
  -3  -5  -2   68.74    5.16 
  -5   3  -2   59.38    5.02 
   5  -3  -2   60.69    4.35 
  -3  -5  -2   68.98    4.69 
  -3  -5  -2   61.44    5.13 
  -5   3  -2   77.37    4.57 
   5  -3  -2   71.68    5.09 
   3   5  -2   62.57    4.46 
   3   5  -2   72.43    5.21 
  -5   3  -2   63.68    4.38 
  -5   3  -2   72.24    4.39 
   5  -3  -2   70.17    4.74 
   3   5  -2   69.22    5.20 
  -3  -5  -2   66.63    4.55 
  -3  -5  -2   68.27    4.46 
  -3  -5  -2   68.24    4.46 
  -5   3  -2   74.03    4.79 
   3   5  -2   70.51    4.79 
  -5   3  -2   66.19    5.04 
   3   5  -2   60.39    4.45 
   3   5  -2   60.14    5.00 
   5  -3   2   71.34    4.52 
  -5   3   2   61.94    4.50 
  -5   3   2   60.98    5.15 
   3   5   2   72.27    4.44 
  -5   3   2   70.83    4.92 
   5  -3   2   66.68    4.76 
   5  -3   2   65.45    4.52 
  -5   3   2   69.77    4.67 
  -5   3   2   73.38    4.61 
   5  -3   2   69.83    4.57 
   3   5   2   71.43    4.38 
  -3  -5   2   65.59    4.89 
  -3  -5   2   69.21    4.51 
   3   5   2   70.96    4.44 
  -3  -5   2   70.98    5.25 
   5  -3   2   63.68    4.74 
   3   5   2   64.25    4.39 
   5  -3   2   67.36    4.26 
   3   5   2   66.12    4.62 
  -3  -5   2   74.56    4.57 
  -3  -5   2   75.27    4.76 
   5  -3   2   66.61    4.57 
   3   5   2   68.23    4.25 
  -3  -5   2   68.01    4.65 
   3   5   2   69.43    4.97 
   5  -3   2   69.65    4.25 
  -5   3   2   60.68    4.43 
  -5   3   2   62.08    5.12 
  -5   3   2   61.84    4.51 
   3   5   2   70.47    4.41 
  -3  -5   2   73.27    4.95 
   3   5   2   66.80    5.11 
   3   5   2   69.18    4.44 
   5  -3   2   69.66    4.42 
   3   5   2   62.19    4.65 
  -5   3   2   61.94    4.60 
  -5   3   2   60.66    4.42 
  -3  -5   2   64.35    5.23 
   3   5   2   76.13    5.10 
  -3  -5   2   61.17    4.52 
  -3  -5   2   74.49    4.56 
   4   5  -2   31.27    2.58 
   5  -4  -2   29.48    2.20 
   4   5  -2   27.33    2.23 
   5  -4  -2   28.20    2.37 
   5  -4  -2   29.73    2.18 
   5  -4  -2   32.38    2.48 
   5  -4  -2   28.93    2.36 
  -4  -5  -2   31.28    2.24 
  -5   4  -2   30.51    2.26 
  -5   4  -2   30.67    2.17 
  -5   4  -2   30.72    2.17 
  -4  -5  -2   31.39    2.52 
  -4  -5  -2   26.63    2.33 
  -5   4  -2   29.62    2.17 
  -5   4  -2   35.00    2.57 
   5  -4  -2   29.59    2.57 
   4   5  -2   26.06    2.23 
   4   5  -2   30.80    2.56 
   5  -4  -2   28.47    2.25 
   5  -4  -2   28.40    2.49 
   5  -4  -2   30.90    2.15 
   4   5  -2   27.72    2.24 
   4   5  -2   25.89    2.52 
  -4  -5  -2   33.54    2.34 
   5  -4  -2   27.70    2.25 
  -5   4  -2   29.78    2.39 
  -5   4  -2   33.02    2.59 
   5  -4  -2   25.43    2.14 
   4   5  -2   27.98    2.41 
  -4  -5  -2   29.13    2.16 
  -4  -5  -2   29.14    2.15 
  -5   4  -2   31.70    2.33 
   5  -4  -2   31.33    2.25 
   5  -4  -2   34.93    2.27 
  -4  -5  -2   24.99    2.48 
   4   5  -2   29.41    2.34 
   4   5  -2   27.53    2.25 
  -4  -5  -2   30.18    2.18 
  -4  -5  -2   31.25    2.31 
   4   5  -2   31.81    2.24 
  -5   4   2   30.81    2.67 
  -4  -5   2   33.44    2.72 
   5  -4   2   26.40    2.06 
  -4  -5   2   34.44    2.40 
   4   5   2   29.35    2.15 
   5  -4   2   30.13    2.12 
  -5   4   2   28.46    2.48 
  -4  -5   2   37.06    2.33 
   4   5   2   27.09    2.13 
  -5   4   2   31.69    2.34 
   5  -4   2   31.25    2.10 
  -4  -5   2   29.05    2.40 
   4   5   2   32.79    2.13 
   5  -4   2   32.67    2.39 
  -4  -5   2   30.21    2.43 
   4   5   2   30.23    2.46 
  -5   4   2   31.41    2.63 
  -4  -5   2   27.39    2.57 
   5  -4   2   27.50    2.26 
   4   5   2   31.58    2.17 
  -5   4   2   26.91    2.29 
   4   5   2   32.87    2.38 
   5  -4   2   22.87    2.29 
  -5   4   2   30.48    2.40 
   5  -4   2   30.31    2.43 
   5  -4   2   32.60    2.26 
  -4  -5   2   29.75    2.39 
   4   5   2   30.60    2.15 
  -4  -5   2   37.01    2.33 
  -5   4   2   30.47    2.29 
   4   5   2   29.28    2.24 
   5  -4   2   29.67    2.14 
   4   5   2   31.79    2.20 
   5  -4   2   28.92    2.12 
  -4  -5   2   27.83    2.23 
  -5   5  -2   20.77    2.03 
   5  -5  -2   25.42    1.81 
   5  -5  -2   20.82    1.70 
  -5  -5  -2   22.25    1.95 
   5  -5  -2   19.73    1.89 
  -5  -5  -2   22.68    1.68 
  -5   5  -2   19.36    1.94 
   5   5  -2   20.92    1.82 
   5  -5  -2   21.03    1.75 
  -5  -5  -2   20.31    1.61 
   5   5  -2   22.41    1.75 
   5   5  -2   21.04    2.00 
   5  -5  -2   19.69    1.75 
  -5   5  -2   20.61    1.78 
   5  -5  -2   20.94    1.94 
   5  -5  -2   21.07    1.70 
   5   5  -2   20.27    1.72 
  -5  -5  -2   20.51    1.84 
   5   5  -2   21.04    1.93 
  -5  -5  -2   20.67    1.89 
   5  -5  -2   23.40    2.04 
   5  -5  -2   20.95    1.74 
  -5  -5  -2   20.30    1.61 
   5   5  -2   21.82    1.79 
  -5   5  -2   19.95    1.82 
  -5   5  -2   23.09    1.75 
   5   5  -2   21.45    1.79 
  -5   5  -2   23.17    1.75 
   5  -5  -2   18.09    1.66 
   5   5  -2   25.13    1.84 
  -5  -5  -2   20.37    1.68 
  -5   5  -2   20.57    1.72 
  -5   5   2   22.13    1.82 
   5   5   2   22.08    1.60 
   5  -5   2   21.42    1.65 
  -5  -5   2   22.83    2.11 
  -5   5   2   19.64    1.87 
   5   5   2   21.38    1.60 
  -5   5   2   20.24    2.08 
  -5   5   2   20.12    1.99 
   5   5   2   20.56    1.61 
   5   5   2   20.92    1.78 
   5   5   2   24.12    1.71 
  -5  -5   2   23.36    1.90 
   5  -5   2   20.60    1.68 
  -5  -5   2   19.26    1.71 
  -5  -5   2   21.28    1.86 
  -5  -5   2   20.68    2.01 
   5  -5   2   18.43    1.77 
   5  -5   2   20.60    1.77 
   5  -5   2   18.13    1.80 
   5   5   2   23.03    1.60 
   5   5   2   22.04    1.59 
  -5  -5   2   22.18    1.76 
  -5  -5   2   19.23    1.71 
   5  -5   2   21.51    1.65 
  -5  -5   2   23.03    1.86 
   5  -5   2   18.87    1.87 
   5  -5   2   23.09    1.76 
   5   5   2   20.14    1.64 
  -5  -5   2   23.77    1.79 
  -5   5   2   20.20    1.82 
   5  -5   2   23.14    1.73 
  -5   5   2   21.46    2.06 
   5   5   2   21.17    1.87 
   5  -6  -2   40.77    3.47 
  -5   6  -2   52.24    3.65 
   6   5  -2   52.91    3.72 
   6   5  -2   45.46    3.96 
   6   5  -2   52.46    3.57 
  -6  -5  -2   51.41    4.01 
  -6  -5  -2   50.72    3.99 
  -6  -5  -2   51.00    3.47 
   5  -6  -2   50.27    3.55 
  -5   6  -2   55.28    3.86 
   5  -6  -2   50.93    3.60 
   5  -6  -2   46.35    3.81 
   6   5  -2   51.51    3.82 
   6   5  -2   44.04    3.46 
  -6  -5  -2   50.89    3.44 
  -6  -5  -2   55.31    3.70 
   5  -6  -2   51.15    4.00 
   5  -6  -2   47.84    3.58 
  -5   6  -2   59.31    4.30 
   6   5  -2   47.94    3.49 
  -6  -5  -2   50.88    3.44 
   6   5  -2   46.19    3.49 
   5  -6  -2   47.74    3.54 
   6   5  -2   50.01    3.50 
   5  -6  -2   47.82    3.55 
   6   5   2   48.89    3.29 
  -5   6   2   50.24    3.78 
   5  -6   2   47.91    3.84 
  -6  -5   2   52.75    3.53 
   5  -6   2   54.99    3.53 
  -6  -5   2   54.83    3.63 
  -5   6   2   51.82    3.74 
   5  -6   2   47.69    3.89 
   6   5   2   52.48    3.33 
   6   5   2   55.95    3.87 
  -6  -5   2   50.34    3.70 
   6   5   2   52.21    3.26 
   5  -6   2   52.40    3.81 
   5  -6   2   55.31    3.67 
   6   5   2   53.49    3.43 
   6   5   2   49.11    3.52 
  -5   6   2   50.13    3.84 
  -6  -5   2   48.05    4.17 
   5  -6   2   47.48    3.46 
  -6  -5   2   58.56    4.24 
   5  -6   2   53.31    3.56 
  -6  -5   2   52.38    3.61 
   5  -6   2   49.74    3.50 
   6   5   2   51.96    3.63 
  -5   6   2   53.72    4.11 
   6   5   2   52.23    3.31 
  -6  -5   2   54.82    3.62 
   6   4  -2   70.36    4.41 
  -4   6  -2   65.84    4.70 
  -4   6  -2   68.11    5.27 
  -6  -4  -2   66.76    5.01 
   6   4  -2   67.46    4.46 
  -4   6  -2   62.05    4.57 
   6   4  -2   69.71    4.66 
   6   4  -2   65.56    4.39 
  -6  -4  -2   67.19    4.31 
  -4   6  -2   64.79    4.72 
   4  -6  -2   64.12    4.97 
   6   4  -2   64.12    4.38 
   4  -6  -2   58.84    4.46 
  -4   6  -2   65.89    5.06 
   4  -6  -2   66.36    4.61 
   4  -6  -2   64.90    4.43 
   4  -6  -2   66.23    4.53 
  -6  -4  -2   65.68    4.99 
  -6  -4  -2   67.23    4.31 
   6   4  -2   63.94    4.94 
  -4   6  -2   73.17    4.81 
   4  -6  -2   69.77    4.56 
   6   4  -2   64.33    4.35 
  -4   6  -2   68.06    5.30 
  -6  -4  -2   69.70    4.34 
   4  -6  -2   68.41    4.86 
   6   4  -2   60.26    4.66 
  -6  -4  -2   65.09    4.50 
   4  -6  -2   59.43    4.39 
   4  -6  -2   70.27    4.50 
   4  -6   2   63.98    4.76 
  -4   6   2   69.60    4.56 
   4  -6   2   68.55    4.87 
  -4   6   2   65.14    4.75 
  -6  -4   2   80.70    4.56 
  -6  -4   2   63.45    5.18 
   4  -6   2   68.85    4.95 
   6   4   2   64.07    4.13 
   6   4   2   61.98    4.13 
   4  -6   2   69.30    4.52 
   6   4   2   64.16    4.43 
   4  -6   2   78.51    4.55 
  -6  -4   2   66.26    4.49 
   4  -6   2   70.51    4.61 
   6   4   2   63.48    4.49 
  -6  -4   2   63.80    4.62 
  -4   6   2   69.40    5.13 
  -6  -4   2   66.26    4.49 
   6   4   2   73.73    4.16 
   4  -6   2   63.27    4.38 
  -4   6   2   66.11    4.79 
   6   4   2   70.79    4.28 
  -6  -4   2   73.96    5.28 
   4  -6   2   66.60    4.44 
   4  -6   2   65.88    4.38 
  -4   6   2   63.70    4.60 
   6   4   2   65.00    4.76 
   3  -6  -2  169.01   10.82 
   3  -6  -2  158.12   11.00 
  -3   6  -2  167.75   10.66 
   3  -6  -2  158.24   11.52 
   3  -6  -2  156.32   12.24 
  -3   6  -2  164.88   12.21 
   6   3  -2  174.01   10.32 
   6   3  -2  177.92   10.32 
   3  -6  -2  169.96   10.21 
  -3   6  -2  166.74   11.67 
  -3   6  -2  157.60   12.20 
   6   3  -2  162.76   10.23 
  -6  -3  -2  186.90   10.46 
  -3   6  -2  148.42   10.92 
   3  -6  -2  151.18   10.64 
   3  -6  -2  174.54   11.26 
  -6  -3  -2  165.31   11.85 
   3  -6  -2  167.64   12.26 
   6   3  -2  178.73   11.50 
   6   3  -2  159.38   10.19 
  -6  -3  -2  167.62   11.87 
  -6  -3  -2  156.42   10.31 
   6   3  -2  161.72   10.23 
  -3   6  -2  152.63   10.91 
   6   3  -2  160.17   10.86 
  -6  -3  -2  178.26   10.30 
   6   3  -2  161.34   10.86 
   3  -6  -2  153.19   10.35 
   6   3  -2  167.30   10.22 
  -3   6  -2  151.33   10.96 
  -6  -3  -2  178.41   10.32 
   3  -6  -2  152.40   10.51 
   3  -6  -2  168.96   11.12 
   3  -6  -2  175.54   10.49 
   6   3   2  153.15   10.60 
  -3   6   2  184.70   10.61 
   6   3   2  165.17   10.61 
   3  -6   2  194.30   11.62 
   6   3   2  176.50   11.26 
  -3   6   2  165.38   12.29 
  -3   6   2  165.36   11.02 
   3  -6   2  155.90   10.33 
  -6  -3   2  144.92   10.48 
   3  -6   2  158.67   10.51 
   3  -6   2  168.69   11.07 
  -3   6   2  165.91   11.70 
   3  -6   2  171.07   10.16 
   3  -6   2  173.97   10.61 
   3  -6   2  169.57   10.75 
   3  -6   2  165.99   11.12 
  -3   6   2  169.41   10.44 
   3  -6   2  155.49   10.39 
  -6  -3   2  144.97   10.49 
  -6  -3   2  173.23   10.80 
  -6  -3   2  175.62   12.10 
  -6  -3   2  146.42   12.06 
   3  -6   2  168.69   10.35 
  -3   6   2  181.35   11.02 
  -6  -3   2  181.84   10.56 
   6   3   2  174.75   10.61 
   3  -6   2  179.84   12.24 
   3  -6   2  181.03   12.19 
   6   2  -2   63.79    4.35 
   2  -6  -2   66.29    4.53 
  -6  -2  -2   70.49    4.90 
   2  -6  -2   71.34    5.38 
   2  -6  -2   66.25    4.77 
   2  -6  -2   64.60    4.50 
   6   2  -2   72.71    4.35 
  -2   6  -2   69.02    4.79 
   6   2  -2   71.07    4.65 
   6   2  -2   69.86    4.69 
   2  -6  -2   69.34    5.02 
   6   2  -2   60.14    4.30 
  -6  -2  -2   69.80    4.44 
   2  -6  -2   67.75    4.45 
   2  -6  -2   64.81    4.68 
   2  -6  -2   70.63    5.32 
  -2   6  -2   68.33    4.78 
  -2   6  -2   55.62    5.02 
   2  -6  -2   69.74    4.87 
   2  -6  -2   72.24    4.71 
   2  -6  -2   67.05    4.61 
  -2   6  -2   62.67    4.71 
   6   2  -2   64.90    4.33 
  -6  -2  -2   68.69    4.88 
   2  -6  -2   59.52    4.55 
   6   2  -2   63.19    4.86 
  -2   6  -2   63.43    4.60 
   6   2  -2   68.03    4.63 
  -2   6  -2   80.55    5.45 
  -6  -2   2   65.17    5.14 
   2  -6   2   62.96    4.61 
   6   2   2   67.60    4.35 
   6   2   2   69.62    4.61 
   2  -6   2   74.79    5.37 
  -6  -2   2   66.30    4.59 
   2  -6   2   63.43    4.63 
  -6  -2   2   69.36    4.46 
  -6  -2   2   67.43    4.43 
   2  -6   2   66.98    5.00 
   2  -6   2   72.10    4.49 
  -6  -2   2   78.09    5.21 
  -2   6   2   70.97    4.60 
  -6  -2   2   69.36    4.47 
  -2   6   2   71.51    4.81 
   6   2   2   73.68    4.60 
  -2   6   2   67.17    5.14 
  -2   6   2   74.15    4.82 
   6   2   2   68.75    4.37 
   2  -6   2   58.55    4.78 
  -6  -2   2   65.49    4.60 
   2  -6   2   63.14    4.79 
   2  -6   2   61.22    4.47 
   2  -6   2   71.24    4.51 
   2  -6   2   66.39    4.40 
  -1   6  -2    9.88    1.27 
  -1   6  -2    9.90    1.13 
  -1   6  -2    9.93    1.10 
   1  -6  -2    7.00    0.95 
  -1   6  -2    6.61    1.11 
  -1   6  -2    8.62    1.10 
   6   1  -2    9.34    0.98 
   6   1  -2    8.18    0.96 
   1  -6  -2    8.92    0.94 
   6   1  -2    9.22    0.94 
   1  -6  -2    6.86    1.06 
   1  -6  -2   11.14    1.22 
   1  -6  -2   11.09    1.07 
   1  -6  -2    8.60    1.00 
   1  -6  -2    9.91    1.24 
   6   1  -2    8.57    0.88 
   6   1  -2    9.45    0.92 
   6   1  -2   10.34    1.03 
   1  -6  -2    7.81    1.06 
  -1   6  -2    9.53    1.06 
   1  -6  -2   11.21    1.09 
  -1   6  -2    7.94    1.05 
   1  -6  -2   10.98    1.14 
  -6  -1   2    9.89    0.96 
   1  -6   2   12.43    1.14 
  -6  -1   2    7.99    0.86 
  -1   6   2    8.46    1.05 
   1  -6   2    8.79    0.99 
  -1   6   2    9.95    1.12 
   1  -6   2    8.26    1.09 
  -1   6   2    9.94    1.09 
  -6  -1   2    9.63    1.04 
  -6  -1   2    7.99    0.86 
   1  -6   2   10.80    1.03 
   1  -6   2   11.73    1.08 
   1  -6   2    9.64    1.17 
  -1   6   2    9.81    1.17 
  -6  -1   2    9.90    0.92 
  -1   6   2   11.02    1.15 
  -6  -1   2    8.99    0.85 
   1  -6   2    8.99    1.09 
  -1   6   2    8.24    1.16 
  -1   6   2   10.99    1.23 
   1  -6   2    9.47    1.14 
  -6  -1   2    8.75    0.91 
   1  -6   2    6.82    1.05 
  -1   6   2    8.91    1.19 
   1  -6   2    9.73    1.04 
  -6  -1   2    8.74    1.02 
   1  -6   2    7.93    1.16 
   0   6  -2   66.44    4.74 
   0  -6  -2   69.56    4.87 
   0   6  -2   76.75    5.62 
   0  -6  -2   73.36    5.52 
   0   6  -2   65.22    4.88 
   0  -6  -2   73.20    4.82 
   6   0  -2   79.05    4.84 
   0   6  -2   66.03    4.93 
  -6   0  -2   72.39    5.07 
   6   0  -2   71.19    4.52 
   6   0  -2   76.79    4.86 
   0  -6  -2   72.92    5.11 
   6   0  -2   71.95    5.08 
   0  -6  -2   75.53    4.73 
   0  -6  -2   67.96    5.02 
   0   6  -2   79.02    5.56 
   0   6  -2   67.28    4.79 
  -6   0  -2   66.00    5.05 
   6   0  -2   65.27    4.49 
   0   6  -2   69.13    5.04 
   0  -6  -2   68.12    4.82 
   6   0  -2   70.87    4.81 
   0  -6  -2   75.89    5.22 
   0  -6  -2   73.72    4.79 
   0   6  -2   70.19    5.32 
   0   6  -2   66.47    4.95 
  -6   0   2   75.18    5.33 
   0  -6   2   62.78    4.76 
   0   6   2   72.10    4.78 
   0   6   2   65.59    4.72 
   0   6   2   73.50    4.77 
   0  -6   2   68.54    4.77 
   0  -6   2   66.45    4.69 
   0  -6   2   69.49    5.49 
   0   6   2   75.10    5.06 
  -6   0   2   70.20    4.65 
   0  -6   2   75.29    5.07 
   0  -6   2   70.17    4.98 
   0   6   2   65.88    4.71 
   0   6   2   69.65    4.51 
  -6   0   2   75.85    4.79 
   0  -6   2   67.11    4.83 
   0   6   2   62.87    5.25 
   0   6   2   76.09    5.51 
   0   6   2   79.59    4.97 
   0  -6   2   66.91    5.50 
   0   6   2   72.13    4.97 
  -6   0   2   74.80    4.62 
  -6   0   2   70.03    4.65 
  -6   0   2   76.23    4.80 
  -6   0   2   69.00    5.00 
  -6   0   2   74.20    5.38 
   6   0   2   62.23    4.73 
   0   6   2   78.33    5.59 
   1   6  -2   12.42    1.21 
  -1  -6  -2   11.14    1.03 
  -1  -6  -2   10.83    1.25 
   1   6  -2    9.00    1.09 
  -1  -6  -2    8.10    1.07 
  -1  -6  -2   11.14    1.03 
  -6   1  -2    7.59    0.82 
  -1  -6  -2   10.83    1.04 
   1   6  -2   12.07    1.27 
   1   6  -2    8.87    1.10 
  -1  -6  -2   10.64    1.27 
   6  -1  -2   10.01    0.90 
   6  -1  -2    8.77    0.87 
  -1  -6  -2   12.61    1.21 
   6  -1  -2    8.29    0.96 
   1   6  -2   10.90    1.15 
   6  -1  -2    9.93    1.01 
  -6   1  -2    9.20    0.83 
   6  -1  -2    8.18    0.89 
   6  -1  -2    9.27    0.92 
   6  -1  -2    8.74    0.90 
   6  -1  -2    9.67    1.00 
   1   6  -2    9.03    0.97 
   1   6  -2   11.49    1.32 
  -1  -6  -2   11.41    1.09 
   1   6  -2    7.38    1.17 
   6  -1  -2    8.55    0.97 
  -1  -6  -2    8.77    1.06 
  -1  -6  -2   10.94    0.97 
   1   6  -2    9.88    1.08 
  -1  -6  -2    9.95    1.18 
   1   6  -2   14.21    1.37 
   1   6  -2    9.68    1.01 
   1   6   2    9.85    1.19 
  -6   1   2   10.79    0.96 
  -6   1   2   10.15    0.94 
   1   6   2    8.46    1.02 
  -6   1   2    8.80    0.95 
   1   6   2    8.24    1.02 
  -6   1   2    9.75    0.89 
  -1  -6   2    9.71    1.02 
   6  -1   2   10.16    0.79 
  -1  -6   2    8.44    1.11 
  -1  -6   2    8.87    1.17 
   1   6   2   12.03    1.14 
  -1  -6   2    7.11    1.06 
   1   6   2    6.18    1.08 
  -6   1   2   10.47    1.12 
   1   6   2    8.44    1.10 
  -6   1   2   10.15    0.94 
   1   6   2    8.96    1.04 
  -6   1   2    9.15    0.97 
  -6   1   2    9.75    0.89 
  -1  -6   2    7.35    1.00 
   1   6   2    8.94    1.04 
   1   6   2    9.11    1.18 
  -1  -6   2    9.95    1.14 
  -6   1   2    9.06    1.06 
   6  -1   2   11.92    1.22 
   1   6   2    9.13    0.95 
   6  -1   2   10.03    0.81 
  -1  -6   2    8.48    1.01 
   1   6   2   10.58    1.11 
   1   6   2    6.23    0.96 
  -1  -6   2    8.31    1.06 
   6  -1   2    9.70    0.81 
  -6   2  -2   72.44    4.43 
   6  -2  -2   73.08    5.02 
   6  -2  -2   72.51    4.44 
  -2  -6  -2   64.75    4.75 
   6  -2  -2   72.27    4.51 
  -2  -6  -2   70.34    4.70 
   2   6  -2   75.02    4.87 
   2   6  -2   81.71    4.79 
   2   6  -2   68.92    4.71 
  -6   2  -2   69.47    5.12 
  -2  -6  -2   71.67    4.67 
  -2  -6  -2   69.32    4.69 
  -2  -6  -2   69.83    5.06 
   6  -2  -2   66.02    4.49 
  -2  -6  -2   63.62    5.35 
   2   6  -2   65.38    4.88 
  -6   2  -2   59.39    4.39 
   2   6  -2   73.76    5.30 
   2   6  -2   83.32    4.82 
  -6   2  -2   70.42    4.73 
   2   6  -2   76.50    5.52 
   2   6  -2   65.97    5.37 
  -2  -6  -2   78.02    5.50 
   2   6  -2   71.94    5.01 
   6  -2  -2   69.36    4.78 
  -2  -6  -2   71.69    4.68 
  -6   2  -2   72.32    4.42 
  -2  -6  -2   65.81    4.90 
   2   6  -2   69.83    4.71 
  -2  -6  -2   71.10    4.78 
   6  -2  -2   64.43    4.47 
   6  -2  -2   64.25    4.44 
   6  -2  -2   72.61    4.76 
  -6   2  -2   59.34    4.40 
   6  -2  -2   64.88    4.60 
   2   6  -2   71.71    4.47 
  -6   2  -2   67.77    5.10 
   2   6   2   69.66    4.43 
  -2  -6   2   72.36    4.69 
  -6   2   2   71.71    4.58 
   6  -2   2   68.85    4.82 
   2   6   2   77.08    4.88 
  -2  -6   2   75.44    4.74 
  -6   2   2   71.18    4.65 
  -6   2   2   76.45    4.79 
  -6   2   2   66.87    5.27 
  -6   2   2   71.70    4.57 
  -2  -6   2   63.48    5.45 
   6  -2   2   68.32    4.25 
   2   6   2   70.18    4.84 
  -2  -6   2   72.05    5.44 
   2   6   2   74.54    5.40 
   6  -2   2   68.90    4.57 
   2   6   2   64.51    4.88 
   2   6   2   75.35    4.65 
   6  -2   2   63.80    4.59 
   2   6   2   64.97    5.16 
   6  -2   2   76.06    4.57 
  -6   2   2   75.57    4.75 
  -6   2   2   66.51    5.30 
  -2  -6   2   67.89    5.12 
   2   6   2   77.75    5.37 
   2   6   2   59.13    4.57 
  -6   2   2   64.99    5.00 
  -2  -6   2   68.33    4.73 
   2   6   2   65.72    4.71 
   2   6   2   61.04    4.60 
   6  -2   2   63.83    4.25 
   6  -2   2   71.53    4.69 
  -2  -6   2   68.87    4.79 
  -6   2   2   71.17    4.65 
  -6   2   2   65.58    5.31 
   2   6   2   70.59    4.62 
  -2  -6   2   74.38    4.97 
   3   6  -2  194.18   12.26 
   6  -3  -2  154.99   10.34 
   6  -3  -2  177.56   10.91 
   3   6  -2  181.13   10.58 
  -6   3  -2  166.23   10.76 
  -3  -6  -2  188.39   12.29 
   6  -3  -2  173.06   10.28 
  -3  -6  -2  184.10   11.07 
  -6   3  -2  148.86   10.46 
  -6   3  -2  163.84   12.00 
  -6   3  -2  149.16   10.44 
   6  -3  -2  157.86   11.47 
  -3  -6  -2  166.71   10.65 
  -3  -6  -2  179.03   10.63 
   3   6  -2  157.86   10.86 
   6  -3  -2  155.25   10.11 
  -3  -6  -2  168.28   10.65 
  -3  -6  -2  170.00   10.90 
   3   6  -2  169.12   11.04 
   3   6  -2  154.03   11.68 
   3   6  -2  160.82   10.47 
   3   6  -2  160.82   11.07 
   6  -3  -2  167.74   10.30 
   3   6  -2  168.36   10.46 
  -3  -6  -2  154.98   10.81 
  -6   3  -2  163.27   10.48 
   6  -3  -2  164.37   10.26 
  -3  -6  -2  167.83   12.17 
   6  -3  -2  157.86   10.96 
  -3  -6  -2  179.09   10.65 
   6  -3  -2  174.70   10.36 
   3   6  -2  173.74   12.25 
  -3  -6  -2  157.03   11.46 
  -6   3  -2  150.70   11.96 
  -3  -6   2  181.04   11.62 
   6  -3   2  176.28   11.36 
   3   6   2  168.76   10.96 
   3   6   2  173.96   12.17 
  -3  -6   2  158.51   10.53 
   3   6   2  166.49   11.64 
  -3  -6   2  178.18   12.29 
   6  -3   2  178.00   10.00 
   3   6   2  176.27   10.48 
  -6   3   2  155.22   12.09 
  -3  -6   2  160.52   12.30 
  -3  -6   2  140.97   10.82 
   6  -3   2  190.48   10.56 
  -6   3   2  173.64   10.93 
   6  -3   2  161.77   10.80 
   3   6   2  154.77   10.68 
   3   6   2  174.04   10.41 
   3   6   2  160.60   10.97 
   3   6   2  154.95   10.38 
  -3  -6   2  176.70   11.08 
   3   6   2  165.70   10.10 
   6  -3   2  168.75   10.79 
  -3  -6   2  162.45   10.77 
  -6   3   2  181.68   10.59 
   6  -3   2  156.56   10.09 
   3   6   2  170.69   10.36 
  -6   3   2  160.67   10.64 
  -6   3   2  161.67   12.16 
  -6   3   2  162.21   10.87 
   6  -3   2  157.99   10.09 
  -6   3   2  173.85   11.55 
  -6   3   2  160.89   10.62 
  -6   3   2  181.70   10.61 
  -4  -6  -2   67.60    4.47 
   6  -4  -2   62.38    4.88 
   6  -4  -2   66.56    4.41 
  -4  -6  -2   64.89    5.18 
  -6   4  -2   64.17    5.05 
   4   6  -2   72.26    4.56 
  -6   4  -2   62.32    4.39 
   4   6  -2   67.20    4.71 
   4   6  -2   68.16    4.52 
   6  -4  -2   68.46    4.40 
   4   6  -2   70.95    4.57 
  -6   4  -2   64.68    4.44 
   4   6  -2   66.04    5.07 
  -4  -6  -2   67.60    4.46 
   6  -4  -2   61.20    4.42 
  -4  -6  -2   68.02    4.57 
  -4  -6  -2   57.74    4.45 
   6  -4  -2   60.81    4.34 
   6  -4  -2   61.12    4.67 
  -4  -6  -2   67.78    4.63 
  -6   4  -2   68.49    5.11 
  -6   4  -2   62.41    4.38 
   4   6  -2   67.12    4.52 
   6  -4  -2   66.00    4.65 
  -6   4  -2   72.24    4.62 
   4   6  -2   64.98    4.81 
  -4  -6  -2   67.91    5.15 
   6  -4  -2   68.04    4.35 
   4   6  -2   62.16    4.48 
  -6   4   2   70.76    4.49 
  -6   4   2   70.80    4.50 
  -4  -6   2   66.84    4.76 
  -6   4   2   62.73    4.67 
   4   6   2   67.69    4.40 
   6  -4   2   68.11    4.26 
  -4  -6   2   62.97    4.90 
   6  -4   2   65.26    4.26 
   6  -4   2   75.58    4.45 
   4   6   2   62.56    4.67 
   6  -4   2   60.90    4.20 
   4   6   2   73.54    4.43 
  -6   4   2   63.01    4.53 
   4   6   2   56.99    4.33 
   4   6   2   66.49    4.40 
  -6   4   2   69.71    4.57 
  -4  -6   2   62.07    5.25 
  -4  -6   2   67.66    4.55 
   6  -4   2   57.94    4.74 
  -6   4   2   72.55    4.96 
  -6   4   2   62.96    4.54 
  -4  -6   2   67.69    4.66 
  -6   4   2   65.01    4.63 
   6  -4   2   73.38    4.29 
   4   6   2   65.98    4.97 
  -4  -6   2   68.82    4.53 
   6  -4   2   65.42    4.81 
  -4  -6   2   67.75    4.56 
  -6   4   2   68.72    5.27 
   4   6   2   65.62    4.27 
  -4  -6   2   78.51    5.34 
   6  -4   2   73.75    4.26 
   6  -4   2   65.50    4.56 
   4   6   2   62.95    4.60 
   4   6   2   64.16    4.42 
  -6   4   2   64.57    5.16 
   6  -4   2   60.87    4.53 
   5   6  -2   52.10    3.78 
   5   6  -2   50.40    4.09 
   5   6  -2   58.54    3.71 
   6  -5  -2   53.24    3.82 
  -6   5  -2   47.20    4.13 
  -5  -6  -2   55.40    3.60 
   6  -5  -2   47.23    3.57 
   6  -5  -2   50.70    3.53 
  -6   5  -2   50.40    3.75 
   5   6  -2   50.08    3.61 
  -6   5  -2   49.10    3.57 
   5   6  -2   53.18    3.91 
   6  -5  -2   51.39    3.99 
   5   6  -2   45.99    3.58 
   6  -5  -2   51.62    3.55 
  -5  -6  -2   55.18    3.79 
   5   6  -2   49.66    3.64 
  -6   5  -2   47.61    3.54 
   6  -5  -2   53.32    3.60 
  -6   5  -2   47.61    3.54 
   6  -5  -2   48.66    3.82 
   6  -5  -2   49.06    3.51 
  -5  -6  -2   55.49    3.57 
  -5  -6  -2   54.43    4.15 
  -5  -6  -2   49.96    4.13 
  -5  -6  -2   55.49    3.58 
  -5  -6  -2   49.72    3.63 
  -6   5  -2   54.63    4.16 
   6  -5   2   45.47    3.40 
   5   6   2   53.20    3.99 
   6  -5   2   51.35    3.41 
  -5  -6   2   49.30    3.74 
   6  -5   2   57.53    3.48 
  -5  -6   2   48.36    3.63 
   5   6   2   56.02    3.69 
   5   6   2   54.99    3.41 
   5   6   2   48.94    3.74 
  -5  -6   2   52.67    3.64 
   6  -5   2   49.37    3.87 
  -6   5   2   46.66    3.80 
   6  -5   2   51.36    3.74 
   6  -5   2   52.28    3.47 
   6  -5   2   50.60    3.47 
   5   6   2   49.63    3.53 
   5   6   2   50.80    3.45 
  -5  -6   2   48.29    3.64 
   5   6   2   46.66    3.44 
   6  -5   2   51.14    3.58 
   6  -5   2   52.31    3.95 
   6  -5   2   53.90    3.74 
   5   6   2   60.58    3.53 
   5   6   2   50.72    3.46 
  -5  -6   2   51.56    4.24 
  -6   5   2   50.32    4.26 
  -6   5   2   51.04    3.70 
   6  -6  -2   55.39    4.10 
   6  -6  -2   66.07    4.54 
   6   6  -2   66.23    4.52 
   6   6  -2   57.94    4.13 
   6  -6  -2   59.00    4.62 
   6  -6  -2   60.34    4.09 
  -6  -6  -2   63.01    4.22 
   6   6  -2   59.17    4.70 
   6   6  -2   66.20    4.38 
  -6   6  -2   64.88    4.50 
  -6  -6  -2   67.52    4.81 
   6   6  -2   58.58    4.18 
  -6   6  -2   60.11    4.22 
   6  -6  -2   58.10    4.19 
   6  -6  -2   60.65    4.13 
  -6  -6  -2   56.38    4.07 
  -6  -6  -2   62.85    4.30 
  -6  -6  -2   68.03    4.84 
   6   6  -2   56.79    4.12 
  -6  -6  -2   63.87    4.15 
  -6  -6  -2   56.43    4.07 
  -6   6  -2   60.96    4.90 
   6   6  -2   65.32    4.18 
   6  -6  -2   62.69    4.43 
  -6  -6   2   64.79    4.21 
   6  -6   2   60.47    4.06 
  -6  -6   2   60.81    4.35 
  -6   6   2   55.58    4.44 
   6  -6   2   57.15    4.03 
   6   6   2   58.13    4.53 
   6  -6   2   57.74    4.52 
   6  -6   2   59.70    4.02 
   6  -6   2   51.86    4.49 
   6   6   2   64.83    4.11 
  -6  -6   2   62.88    4.26 
   6  -6   2   54.77    4.33 
   6   6   2   54.99    3.90 
   6   6   2   53.51    3.87 
   6  -6   2   66.77    4.25 
  -6  -6   2   60.84    4.92 
   6  -6   2   58.22    4.03 
   6   6   2   54.41    4.26 
   6   6   2   60.19    3.96 
   6   6   2   60.36    4.20 
   6   6   2   55.64    3.93 
  -6  -6   2   62.85    4.27 
   7   6  -2   43.44    3.56 
   6  -7  -2   44.82    3.31 
  -7  -6  -2   45.30    3.27 
  -7  -6  -2   48.60    3.43 
   7   6  -2   48.20    3.39 
  -7  -6  -2   44.07    3.75 
   6  -7  -2   46.42    3.39 
   6  -7  -2   43.67    3.33 
   7   6  -2   45.01    3.76 
   7   6  -2   42.47    3.26 
   6  -7  -2   43.06    3.42 
   6  -7  -2   42.63    3.33 
   6  -7  -2   51.83    3.68 
  -7  -6  -2   44.59    3.22 
  -6   7  -2   55.08    3.78 
   7   6  -2   43.86    3.25 
   7   6  -2   39.26    3.40 
   6  -7  -2   45.78    3.76 
   6  -7  -2   41.82    3.63 
   7   6  -2   47.04    3.26 
  -7  -6  -2   44.44    3.23 
   7   6   2   52.88    3.66 
  -7  -6   2   48.13    3.96 
   7   6   2   52.39    3.30 
   7   6   2   47.19    3.06 
   6  -7   2   47.09    3.72 
  -7  -6   2   44.16    3.38 
  -6   7   2   48.60    3.72 
   7   6   2   45.31    3.40 
   7   6   2   47.62    3.24 
   6  -7   2   39.83    3.63 
   6  -7   2   50.80    3.36 
  -7  -6   2   47.03    3.53 
   6  -7   2   39.24    3.49 
   6  -7   2   45.79    3.26 
   7   6   2   45.24    3.08 
   6  -7   2   40.19    3.25 
   6  -7   2   48.24    3.29 
   7   6   2   45.54    3.06 
  -7  -6   2   44.19    3.38 
   6  -7   2   45.34    3.42 
  -7  -5  -2  250.16   17.43 
   5  -7  -2  204.02   14.97 
   7   5  -2  225.76   14.83 
   5  -7  -2  245.68   15.65 
   7   5  -2  236.86   14.96 
   7   5  -2  228.00   14.97 
  -7  -5  -2  241.20   15.18 
   5  -7  -2  256.80   15.08 
  -7  -5  -2  241.04   15.21 
  -7  -5  -2  256.38   17.41 
   5  -7  -2  234.47   15.12 
   7   5  -2  217.87   16.69 
   7   5  -2  263.54   15.84 
   7   5  -2  237.85   14.90 
   5  -7  -2  234.52   15.20 
  -7  -5  -2  268.78   15.25 
  -7  -5  -2  237.87   15.23 
   5  -7  -2  216.02   16.72 
  -5   7  -2  238.64   15.92 
   7   5  -2  273.12   14.90 
   7   5  -2  240.04   15.81 
   5  -7  -2  250.60   15.21 
   5  -7  -2  226.57   16.06 
   5  -7  -2  243.77   14.80 
  -7  -5   2  243.78   15.37 
   5  -7   2  247.08   15.27 
   5  -7   2  247.40   16.76 
  -5   7   2  262.91   16.05 
  -7  -5   2  264.01   15.74 
   5  -7   2  233.45   16.12 
  -5   7   2  265.51   15.39
[truncated: 1,954,716 more chars]
