# Supplementary material for: M6O4(OH)4 of M = Sn, Pb: Single Crystal Growth and Crystal Structure Determinations Far Away from Routine
Source: MDPI journal article supplement (doi:10.3390/cryst13050739), 2023-04-27
Supplement: s1 [file s1 › crystals-2348544-supplementary/Supplementary Data.pdf]

# Table of contents

**Figure S1:** Ball-and-stick models of  $\text{Pb}_6\text{O}_4(\text{OH})_4$  as result of the different structure models in the two different space groups  $P4/mnc$  (I, II) and  $P\bar{4}2_1c$  (III); structure model I and II, point group  $C_{4h}$  with mirror planes  $m$  (green), center of symmetry  $i$  (dark green) and proper rotation axis  $C_4$  (as part of a  $S_4$  rotoinversion axis, red); structure model III, point group  $S_4$  with  $S_4$ -rotoinversion axis (blue, blue sphere = center of symmetry of the rotoinversion axis).

**Table S1:** Summary of the effect of the different space groups and structure models on some dataset, refinement and validation parameters for  $\text{Sn}_6\text{O}_4(\text{OH})_4$  and  $\text{Pb}_6\text{O}_4(\text{OH})_4$ .

**Table S2:** Full list of bond lengths [ $\text{\AA}$ ] and angles [ $^\circ$ ] for  $\text{Sn}_6\text{O}_4(\text{OH})_4$ .

**Table S3:** Full list of bond lengths [ $\text{\AA}$ ] and angles [ $^\circ$ ] for  $\text{Pb}_6\text{O}_4(\text{OH})_4$ .

**Table S4:** Atomic coordinates ( $\times 10^4$ ) and equivalent isotropic/anisotropic displacement parameters ( $\text{\AA}^2 \times 10^3$ ) for  $\text{Sn}_6\text{O}_4(\text{OH})_4$ . The anisotropic displacement factor exponent takes the form:  $-2\pi^2 [h^2a^{*2}U_{11} + \dots + 2hka^*b^*U_{12}]$ .  $U(\text{eq})$  is defined as one third of the trace of the orthogonalized  $U_{ij}$  tensor.

**Table S5:** Atomic coordinates ( $\times 10^4$ ) and equivalent isotropic/anisotropic displacement parameters ( $\text{\AA}^2 \times 10^3$ ) for  $\text{Pb}_6\text{O}_4(\text{OH})_4$ . The anisotropic displacement factor exponent takes the form:  $-2\pi^2 [h^2a^{*2}U_{11} + \dots + 2hka^*b^*U_{12}]$ .  $U(\text{eq})$  is defined as one third of the trace of the orthogonalized  $U_{ij}$  tensor.

**Table S6:** Selected bond lengths [ $\text{\AA}$ ] and angles for  $\text{M}_6\text{O}_4(\text{OH})_4$  with  $M = \text{Sn}, \text{Pb}$ .

**Figure S2:** Different views [left side = side view, right side = from bottom up] on the ball-and-stick model of the bended seesaw  $\{\text{PbO}_4\}$  coordination of Pb1 with bond lengths [ $\text{\AA}$ ] and angles [ $^\circ$ ]; additional bonds of the oxygen atoms are indicated as shortened sticks; symmetry operations used to generate equivalent atoms:  $^1) 1-y, x, 1-z$ .

**Figure S3:** Different views [left side = side view, right side = from bottom up] on the ball-and-stick model of the bended seesaw  $\{\text{PbO}_4\}$  coordination of Pb2 with bond lengths [ $\text{\AA}$ ] and angles [ $^\circ$ ]; additional bonds of the oxygen atoms are indicated as shortened sticks; symmetry operations used to generate equivalent atoms:  $^1) 1-y, x, 1-z$ ;  $^2) y, 1-x, 1-z$ ;  $^3) 1-x, 1-y, z$ .

**Figure S4:** Different views [left side = side view, right side = from bottom up] on the ball-and-stick model of the bended seesaw  $\{\text{PbO}_4\}$  coordination of Pb2 with bond lengths [ $\text{\AA}$ ] and angles [ $^\circ$ ]; additional bonds of the oxygen atoms are indicated as shortened sticks; symmetry operations used to generate equivalent atoms:  $^1) 1-y, x, 1-z$ ;  $^2) y, 1-x, 1-z$ ;  $^3) 1-x, 1-y, z$ .

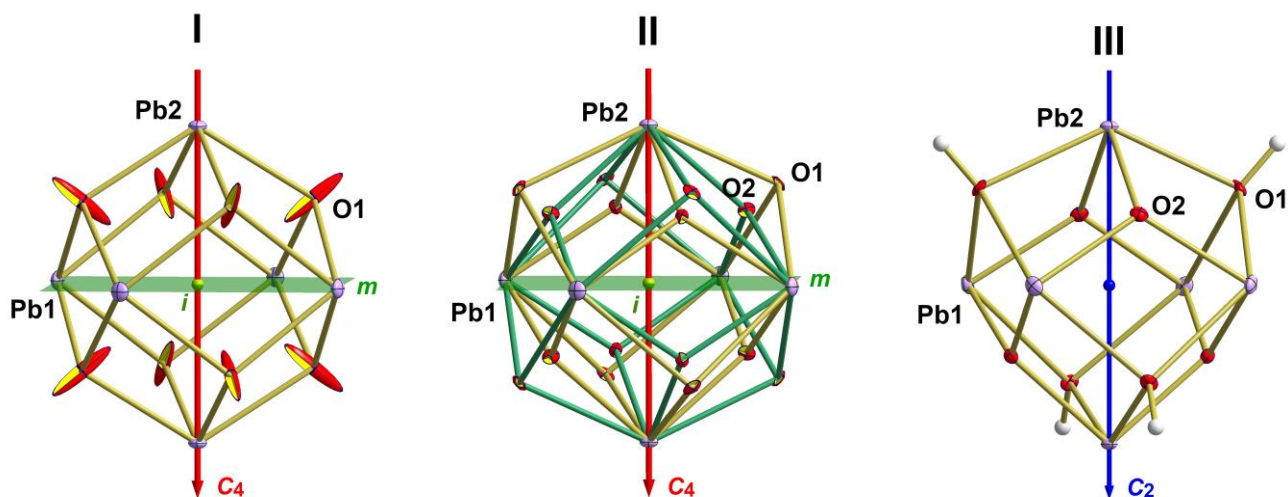

**Figure S1.** Ball-and-stick models of  $\text{Pb}_6\text{O}_4(\text{OH})_4$  as result of the different structure models in the two different space groups  $P4/mnc$  (I, II) and  $P421c$  (III); structure model I and II, point group  $C_{4h}$  with mirror planes  $m$  (green), center of symmetry  $i$  (dark green) and proper rotation axis  $C_4$  (as part of a  $S_4$  rotoinversion axis, red); structure model III, point group  $S_4$  with  $S_4$ -rotoinversion axis (blue, blue sphere = center of symmetry of the rotoinversion axis).

**Table S1.** Summary of the effect of the different space groups and structure models on some dataset, refinement and validation parameters for  $\text{Sn}_6\text{O}_4(\text{OH})_4$  and  $\text{Pb}_6\text{O}_4(\text{OH})_4$ .

|                                           | $\text{Sn}_6\text{O}_4(\text{OH})_4$ |                 |                | $\text{Pb}_6\text{O}_4(\text{OH})_4$ |                 |                |
|-------------------------------------------|--------------------------------------|-----------------|----------------|--------------------------------------|-----------------|----------------|
| structure model                           | I                                    | II              | III            | I                                    | II <sup>4</sup> | III            |
| space group                               | $P4/mnc$                             |                 | $P421c$        | $P4/mnc$                             |                 | $P421c$        |
| $Z'$                                      | 1/8                                  |                 | 1/4            | 1/8                                  |                 | 1/4            |
| Collected reflections                     | 78097                                |                 |                | 125245                               |                 |                |
| Rejected reflections                      | 28064                                |                 | 24737          | 16461                                |                 | 9169           |
| Measured reflexions                       | 50033                                |                 | 53360          | 108784                               |                 | 116076         |
| Unique refelxions                         | 647                                  |                 | 1242           | 689                                  |                 | 1304           |
| $R_{\text{int}}$                          | 0.0600                               |                 | 0.0600         | 0.0993                               |                 | 0.0999         |
| $R_{\sigma}$                              | 0.0097                               |                 | 0.0122         | 0.0122                               |                 | 0.0167         |
| centre of symmetry                        | yes                                  |                 | no             | yes                                  |                 | no             |
| point group                               | $C_{4h}$                             |                 | $S_4$          | $C_{4h}$                             |                 | $S_4$          |
| symmetry elements                         | $C_4, \sigma_h, i$                   |                 | $\bar{4}, C_2$ | $C_4, \sigma_h, i$                   |                 | $\bar{4}, C_2$ |
| weighting parameter $p/q$                 | 0/24.9653                            | 0/7.6551        | 0/0.8625       | 26.9664                              | 0.0091/6.1892   | 0.0080/5.5214  |
| Goof                                      | 1.263                                | 1.557           | 1.332          | 1.090                                | 1.228           | 1.106          |
| $R1^1$                                    | 0.0400                               | 0.0220          | 0.0127         | 0.0280                               | 0.0147          | 0.0157         |
| $wR2^1$                                   | 0.0841                               | 0.0605          | 0.0277         | 0.0482                               | 0.0324          | 0.0285         |
| $\pm\Delta$ [ $e/\text{\AA}^3$ ], near to | 3.87/-3.32, O1                       | 1.71/-1.60, Sn2 | 0.553/-0.552   | 4.44/-4.07, O1                       | 1.50/-1.94, Pb2 | 1.135/-1.880   |
| A-Alerts <sup>3</sup>                     | 5                                    | 0               | 0              | 5                                    | 0               | 0              |
| B-Alerts <sup>3</sup>                     | 4                                    | 1               | 0              | 3                                    | 0               | 0              |
| C-Alerts <sup>3</sup>                     | 16                                   | 3               | 0              | 11                                   | 4               | 4              |
| violations <sup>2</sup>                   | 789                                  |                 | 32             | 46                                   |                 | 4              |

<sup>1</sup>)  $I > 2\sigma(I)$ , <sup>2</sup>) systematic absence violations before merging according to SHELXL, <sup>3</sup>) checkCIF, <sup>4</sup>) without H

**Table S2.** Full list of bond lengths [Å] and angles [°] for Sn<sub>6</sub>O<sub>4</sub>(OH)<sub>4</sub>.

|                     |          |
|---------------------|----------|
| Sn(1)-O(2)#1        | 2.091(2) |
| Sn(1)-O(2)          | 2.091(2) |
| Sn(1)-O(1)          | 2.334(2) |
| Sn(1)-O(1)#2        | 2.392(2) |
| Sn(2)-O(2)          | 2.115(2) |
| Sn(2)-O(2)#3        | 2.115(2) |
| Sn(2)-O(1)          | 2.346(3) |
| Sn(2)-O(1)#3        | 2.346(3) |
| O(1)-H(1)           | 0.9600   |
| O(2)#1-Sn(1)-O(2)   | 96.6(1)  |
| O(2)#1-Sn(1)-O(1)   | 74.2(1)  |
| O(2)-Sn(1)-O(1)     | 74.3(1)  |
| O(2)#1-Sn(1)-O(1)#2 | 73.2(1)  |
| O(2)-Sn(1)-O(1)#2   | 73.0(1)  |
| O(1)-Sn(1)-O(1)#2   | 130.0(1) |
| O(2)-Sn(2)-O(2)#3   | 96.2(1)  |
| O(2)-Sn(2)-O(1)     | 73.6(1)  |
| O(2)#3-Sn(2)-O(1)   | 73.8(1)  |
| O(2)-Sn(2)-O(1)#3   | 73.8(1)  |
| O(2)#3-Sn(2)-O(1)#3 | 73.6(1)  |
| O(1)-Sn(2)-O(1)#3   | 130.4(1) |
| Sn(1)-O(1)-Sn(2)    | 97.9(1)  |
| Sn(1)-O(1)-Sn(1)#1  | 97.1(1)  |
| Sn(2)-O(1)-Sn(1)#1  | 97.4(1)  |
| Sn(1)-O(1)-H(1)     | 116.0    |
| Sn(2)-O(1)-H(1)     | 112.6    |
| Sn(1)#1-O(1)-H(1)   | 130.1    |
| Sn(1)#2-O(2)-Sn(1)  | 115.7(1) |
| Sn(1)#2-O(2)-Sn(2)  | 115.6(1) |
| Sn(1)-O(2)-Sn(2)    | 114.1(1) |

---

Symmetry transformations used to generate equivalent atoms: #1 y,-x,-z #2 -y,x,-z #3 -x,-y,z

**Table S3.** Full list of bond lengths [Å] and angles [°] for Pb<sub>6</sub>O<sub>4</sub>(OH)<sub>4</sub>.

|                      |          |
|----------------------|----------|
| Pb(1)-O(2)#1         | 2.184(5) |
| Pb(1)-O(2)           | 2.192(5) |
| Pb(1)-O(1)           | 2.456(2) |
| Pb(1)-O(1)#1         | 2.475(2) |
| Pb(2)-O(2)#2         | 2.204(5) |
| Pb(2)-O(2)#1         | 2.204(5) |
| Pb(2)-O(1)           | 2.436(6) |
| Pb(2)-O(1)#3         | 2.436(6) |
| O(1)-H(1)            | 0.9600   |
| O(2)#1-Pb(1)-O(2)    | 98.3(3)  |
| O(2)#1-Pb(1)-O(1)    | 74.6(2)  |
| O(2)-Pb(1)-O(1)      | 73.7(2)  |
| O(2)#1-Pb(1)-O(1)#1  | 73.4(2)  |
| O(2)-Pb(1)-O(1)#1    | 73.9(2)  |
| O(1)-Pb(1)-O(1)#1    | 129.8(2) |
| O(2)#2-Pb(2)-O(2)#1  | 99.1(3)  |
| O(2)#2-Pb(2)-O(1)#3  | 74.6(2)  |
| O(2)#1-Pb(2)-O(1)#3  | 74.5(2)  |
| O(2)#2-Pb(2)-O(1)    | 74.5(2)  |
| O(2)#1-Pb(2)-O(1)    | 74.6(2)  |
| O(1)#3-Pb(2)-O(1)    | 131.6(3) |
| Pb(1)-O(1)-Pb(2)     | 97.2(2)  |
| Pb(1)-O(1)-Pb(1)#2   | 97.3(2)  |
| Pb(2)-O(1)-Pb(1)#2   | 97.3(2)  |
| Pb(1)-O(1)-H(1)      | 121.5    |
| Pb(2)-O(1)-H(1)      | 106.6    |
| Pb(1)#2-O(1)-H(1)    | 130.1    |
| Pb(1)#2-O(2)-Pb(1)   | 115.5(2) |
| Pb(1)#2-O(2)-Pb(2)#2 | 113.5(2) |
| Pb(1)-O(2)-Pb(2)#2   | 114.0(2) |

Symmetry transformations used to generate equivalent atoms: #1 -y+1,x,-z+1 #2 y,-x+1,-z+1 #3 -x+1,-y+1,z

**Table S4.** Atomic coordinates ( $\times 10^4$ ) and equivalent isotropic/anisotropic displacement parameters ( $\text{\AA}^2 \times 10^3$ ) for  $\text{Sn}_6\text{O}_4(\text{OH})_4$ . The anisotropic displacement factor exponent takes the form:  $-2\pi^2 [h^2a^{*2}U_{11} + \dots + 2hka^*b^*U_{12}]$ .  $U(\text{eq})$  is defined as one third of the trace of the orthogonalized  $U_{ij}$  tensor.

|       | Wyckoff  | x       | y       | z       | $U_{\text{eq}}$ | $U_{11}$ | $U_{22}$ | $U_{33}$ | $U_{23}$ | $U_{13}$ | $U_{12}$ |
|-------|----------|---------|---------|---------|-----------------|----------|----------|----------|----------|----------|----------|
| Pb(1) | <i>e</i> | 1234(1) | 2929(1) | 22(1)   | 9(1)            | 11(1)    | 6(1)     | 11(1)    | -1(1)    | 3(1)     | -2(1)    |
| Pb(2) | <i>c</i> | 0       | 0       | 2768(1) | 8(1)            | 12(1)    | 9(1)     | 5(1)     | 0        | 0        | 2(1)     |
| O(1)  | <i>e</i> | 2492(3) | 1044(3) | 1681(3) | 10(1)           | 10(1)    | 11(1)    | 10(1)    | -2(1)    | -2(1)    | -2(1)    |
| O(2)  | <i>e</i> | -768(3) | 1844(3) | 1209(2) | 8(1)            | 7(1)     | 8(1)     | 8(1)     | -1(1)    | 0(2)     | 0(1)     |

**Table S5.** Atomic coordinates ( $\times 10^4$ ) and equivalent isotropic/anisotropic displacement parameters ( $\text{\AA}^2 \times 10^3$ ) for  $\text{Pb}_6\text{O}_4(\text{OH})_4$ . The anisotropic displacement factor exponent takes the form:  $-2\pi^2 [h^2a^{*2}U_{11} + \dots + 2hka^*b^*U_{12}]$ .  $U(\text{eq})$  is defined as one third of the trace of the orthogonalized  $U_{ij}$  tensor.

| Bond lengths           | M = Sn   | M = Pb   | Bond angles                               | M = Sn    | M = Pb    |
|------------------------|----------|----------|-------------------------------------------|-----------|-----------|
| M(1)-O(2) <sup>1</sup> | 2.091(2) | 2.184(5) | O(2) <sup>1</sup> -M(1)-O(2)              | 96.6(1)°  | 98.3(3)°  |
| M(1)-O(2)              | 2.091(2) | 2.192(5) | O(2) <sup>1</sup> -M(1)-O(1)              | 74.2(1)°  | 73.4(2)°  |
| M(1)-O(1)              | 2.334(2) | 2.474(5) | O(2) <sup>1</sup> -M(1)-O(1) <sup>2</sup> | 73.2(1)°  | 74.6(2)°  |
| M(1)-O(1) <sup>2</sup> | 2.392(2) | 2.456(6) | O(2)-M(1)-O(1)                            | 74.3(1)°  | 73.9(2)°  |
|                        |          |          | O(2)-M(1)-O(1) <sup>2</sup>               | 73.0(1)°  | 73.6(2)°  |
|                        |          |          | O(1)-M(1)-O(1) <sup>2</sup>               | 130.0(1)° | 129.8(2)° |
| M(2)-O(2)              | 2.115(2) | 2.204(5) | O(2)-M(2)-O(1)                            | 73.6(1)°  | 74.5(2)°  |
| M(2)-O(2) <sup>3</sup> | 2.115(2) | 2.204(5) | O(2)-M(2)-O(2) <sup>3</sup>               | 96.2(1)°  | 99.0(3)°  |
| M(2)-O(1)              | 2.346(3) | 2.436(6) | O(2)-M(2)-O(1) <sup>3</sup>               | 73.8(1)°  | 74.6(2)°  |
| M(2)-O(1) <sup>3</sup> | 2.346(3) | 2.436(6) | O(2) <sup>3</sup> -M(2)-O(1)              | 73.8(1)°  | 74.6(2)°  |
|                        |          |          | O(2) <sup>3</sup> -M(2)-O(1) <sup>3</sup> | 73.6(1)°  | 74.5(2)°  |
|                        |          |          | O(1)-M(2)-O(1) <sup>3</sup>               | 130.4(1)° | 131.6(3)° |

**Table S6.** Selected bond lengths [ $\text{\AA}$ ] and angles for  $\text{M}_6\text{O}_4(\text{OH})_4$  with M = Sn, Pb. Symmetry transformations used to generate equivalent atoms: <sup>1</sup>) y, -x, -z; <sup>2</sup>) -y, x, -z; <sup>3</sup>) -x, -y, z for M = Sn; <sup>1</sup>) -y+1, x, -z+1; <sup>2</sup>) y, -x+1, -z+1; <sup>3</sup>) -x+1, -y+1, z for M = Pb.

|       | Wyckoff  | x       | y       | z       | $U_{\text{eq}}$ | $U_{11}$ | $U_{22}$ | $U_{33}$ | $U_{23}$ | $U_{13}$ | $U_{12}$ |
|-------|----------|---------|---------|---------|-----------------|----------|----------|----------|----------|----------|----------|
| Pb(1) | <i>e</i> | 2001(1) | 6337(1) | 5014(1) | 8(1)            | 5(1)     | 9(1)     | 10(1)    | 2(1)     | 1(1)     | 3(1)     |
| Pb(2) | <i>c</i> | 5000    | 5000    | 2213(1) | 7(1)            | 10(1)    | 8(1)     | 4(1)     | 0        | 0        | 1(1)     |
| O(1)  | <i>e</i> | 2397(7) | 4001(7) | 3290(6) | 7(1)            | 6(2)     | 9(2)     | 7(2)     | -4(2)    | -2(2)    | -1(2)    |
| O(2)  | <i>e</i> | 4243(7) | 6963(7) | 3756(6) | 7(1)            | 8(2)     | 7(2)     | 6(2)     | 1(2)     | 0(2)     | 2(2)     |

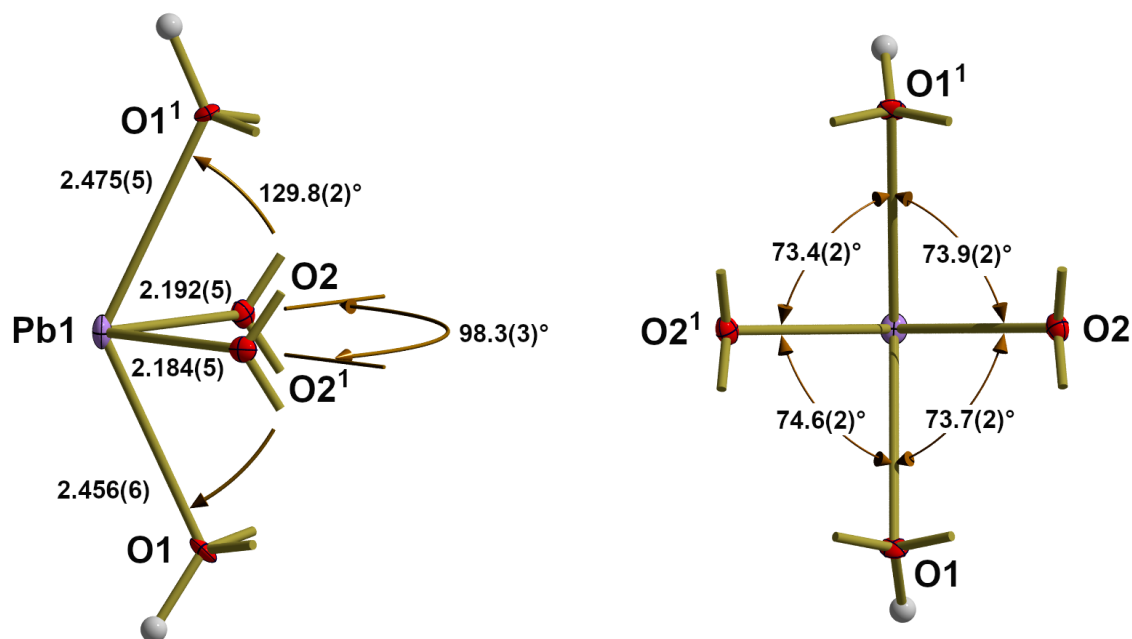

**Figure S2.** Different views [left side = side view, right side = from bottom up] on the ball-and-stick model of the bended seesaw {PbO<sub>4</sub>} coordination of Pb1 with bond lengths [Å] and angles [°]; additional bonds of the oxygen atoms are indicated as shortened sticks; symmetry operations used to generate equivalent atoms: <sup>1</sup>) 1-y,x,1-z.

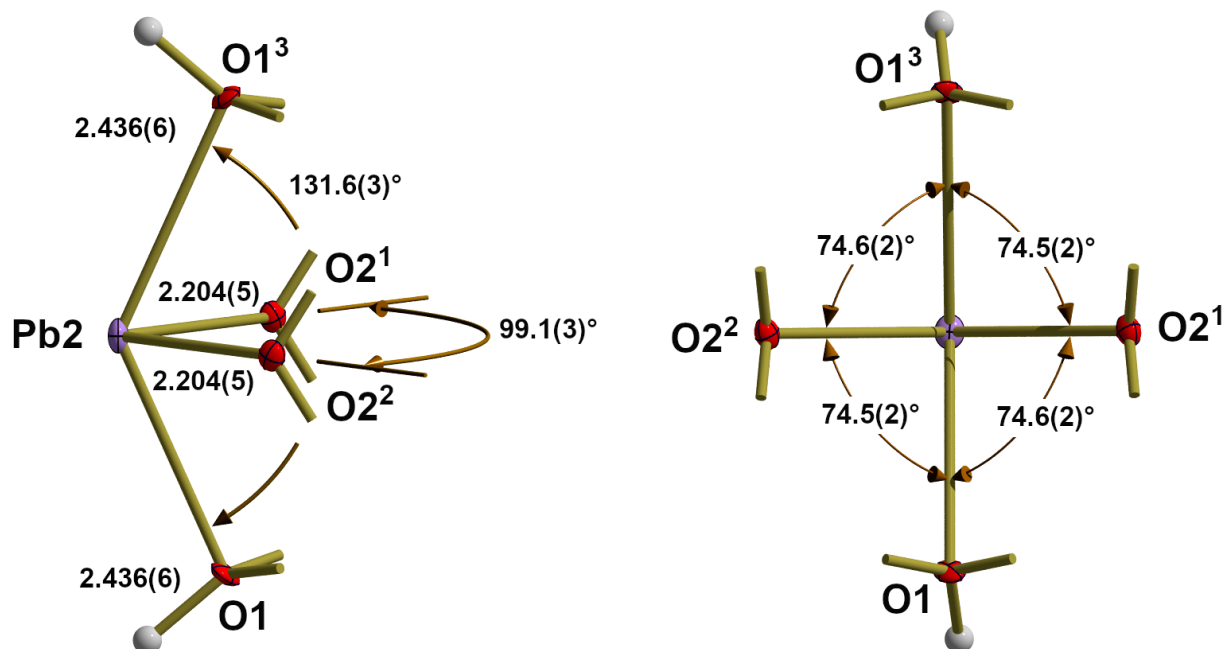

**Figure S3.** Different views [left side = side view, right side = from bottom up] on the ball-and-stick model of the bended seesaw {PbO<sub>4</sub>} coordination of Pb2 with bond lengths [Å] and angles [°]; additional bonds of the oxygen atoms are indicated as shortened sticks; symmetry operations used to generate equivalent atoms: <sup>1</sup>) 1-y,x,1-z; <sup>2</sup>) y,1-x,1-z; <sup>3</sup>) 1-x,1-y,z.

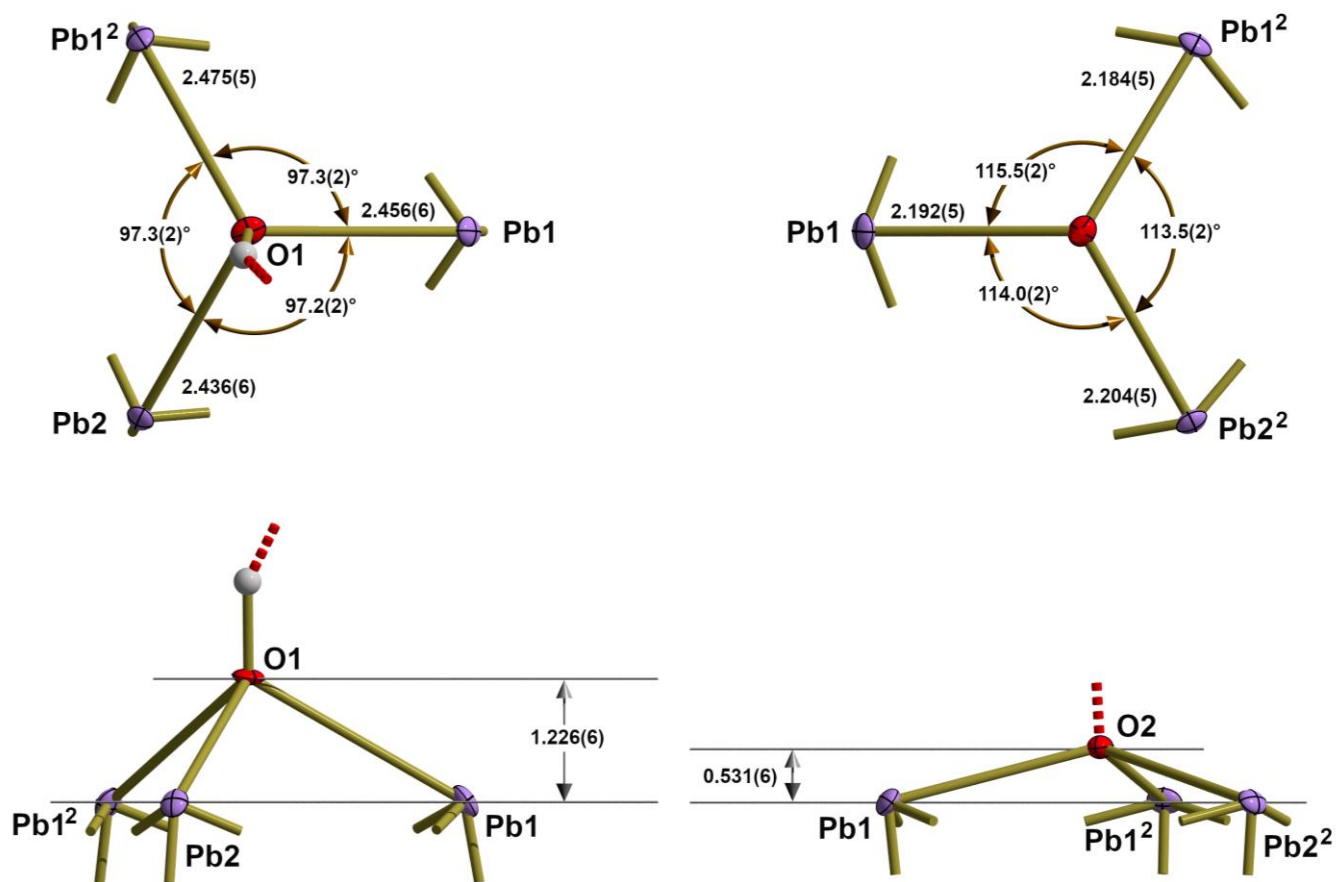

**Figure S4.** Different views [above = from top, below = side view] on the ball-and-stick models of the trigonal-pyramidal coordination of O1 (left) and O2 (right) with bond lengths [Å] and angles [°] for  $\text{Pb}_6\text{O}_4(\text{OH})_4$ ; additional bonds of the oxygen atoms are indicated as shortened sticks; symmetry operations used to generate equivalent atoms: <sup>2</sup>y, 1-x, 1-z.
