# Supplementary material for: M6O4(OH)4 of M = Sn, Pb: Single Crystal Growth and Crystal Structure Determinations Far Away from Routine
Source: MDPI journal article supplement (doi:10.3390/cryst13050739), 2023-04-27
Supplement: s1 [file s1 › crystals-2348544-supplementary/Tabellen Pb6O4(OH)4_I.pdf]

Table 1. Crystal data and structure refinement for Pb<sub>6</sub>O<sub>4</sub>(OH)<sub>4</sub>I.

|                                   |                                                   |
|-----------------------------------|---------------------------------------------------|
| Identification code               | KP2002_0m_d                                       |
| Empirical formula                 | H <sub>4</sub> O <sub>8</sub> Pb <sub>6</sub>     |
| Formula weight                    | 1375.17                                           |
| Temperature                       | 100(2) K                                          |
| Wavelength                        | 0.71073 Å                                         |
| Crystal system, space group       | Tetragonal, P4/mnc                                |
| Unit cell dimensions              | a = 7.9693(3) Å<br>c = 9.2741(3) Å                |
| Volume                            | 589.00(5) Å <sup>3</sup>                          |
| Z, Calculated density             | 2, 7.754 Mg/m <sup>3</sup>                        |
| Absorption coefficient            | 85.455 mm <sup>-1</sup>                           |
| F(000)                            | 1120                                              |
| Crystal size                      | 0.020 x 0.010 x 0.010 mm                          |
| Theta range for data collection   | 3.371 to 34.939 deg.                              |
| Limiting indices                  | -12 ≤ h ≤ 12, -12 ≤ k ≤ 12, -14 ≤ l ≤ 14          |
| Reflections collected / unique    | 108784 / 689 [R(int) = 0.0993]                    |
| Completeness to theta = 25.242    | 100.0 %                                           |
| Absorption correction             | Semi-empirical from equivalents                   |
| Refinement method                 | Full-matrix least-squares on F <sup>2</sup>       |
| Data / restraints / parameters    | 689 / 0 / 20                                      |
| Goodness-of-fit on F <sup>2</sup> | 1.090                                             |
| Final R indices [I > 2σ(I)]       | R <sub>1</sub> = 0.0217, wR <sub>2</sub> = 0.0421 |
| R indices (all data)              | R <sub>1</sub> = 0.0237, wR <sub>2</sub> = 0.0427 |
| Extinction coefficient            | 0.00128(7)                                        |
| Largest diff. peak and hole       | 4.435 and -4.070 e.Å <sup>-3</sup>                |

Table 2. Atomic coordinates ( $\times 10^4$ ) and equivalent isotropic displacement parameters ( $\text{\AA}^2 \times 10^3$ ) for  $\text{Pb}_6\text{O}_4(\text{OH})_4\text{I}$ .  $U(\text{eq})$  is defined as one third of the trace of the orthogonalized  $U_{ij}$  tensor.

|       | x       | y        | z        | $U(\text{eq})$ |
|-------|---------|----------|----------|----------------|
| Pb(1) | 7999(1) | 6336(1)  | 5000     | 8(1)           |
| Pb(2) | 5000    | 5000     | 2213(1)  | 7(1)           |
| O(1)  | 5887(8) | 7310(13) | 3503(10) | 72(4)          |

Table 3. Bond lengths [Å] and angles [deg] for Pb<sub>6</sub>O<sub>4</sub>(OH)<sub>4</sub>I.

---

|                     |          |
|---------------------|----------|
| Pb(1)-O(1)#1        | 2.315(8) |
| Pb(1)-O(1)          | 2.315(8) |
| Pb(1)-O(1)#2        | 2.317(7) |
| Pb(1)-O(1)#3        | 2.317(7) |
|                     |          |
| Pb(2)-O(1)#2        | 2.307(7) |
| Pb(2)-O(1)#5        | 2.307(7) |
| Pb(2)-O(1)#6        | 2.307(7) |
| Pb(2)-O(1)          | 2.307(7) |
|                     |          |
| O(1)#1-Pb(1)-O(1)   | 73.7(4)  |
| O(1)#1-Pb(1)-O(1)#2 | 116.3(6) |
| O(1)-Pb(1)-O(1)#2   | 74.0(4)  |
| O(1)#1-Pb(1)-O(1)#3 | 74.0(4)  |
| O(1)-Pb(1)-O(1)#3   | 116.3(6) |
| O(1)#2-Pb(1)-O(1)#3 | 73.6(4)  |
|                     |          |
| O(1)#2-Pb(2)-O(1)#5 | 74.4(3)  |
| O(1)#2-Pb(2)-O(1)#6 | 117.5(6) |
| O(1)#5-Pb(2)-O(1)#6 | 74.4(3)  |
| O(1)#2-Pb(2)-O(1)   | 74.4(3)  |
| O(1)#5-Pb(2)-O(1)   | 117.5(6) |
| O(1)#6-Pb(2)-O(1)   | 74.4(3)  |
|                     |          |
| Pb(2)-O(1)-Pb(1)    | 105.5(4) |
| Pb(2)-O(1)-Pb(1)#6  | 105.4(4) |
| Pb(1)-O(1)-Pb(1)#6  | 106.0(4) |

---

Symmetry transformations used to generate equivalent atoms:

#1 x,y,-z+1      #2 y,-x+1,z      #3 y,-x+1,-z+1

#4 -x+1,-y+1,-z+1      #5 -x+1,-y+1,z

#6 -y+1,x,z

Table 4. Anisotropic displacement parameters ( $\text{\AA}^2 \times 10^3$ ) for  $\text{Pb}_6\text{O}_4(\text{OH})_4\text{I}$ .  
The anisotropic displacement factor exponent takes the form:  
 $-2 \pi^2 [ h^2 a^{*2} U_{11} + \dots + 2 h k a^* b^* U_{12} ]$

|       | U11   | U22    | U33   | U23    | U13    | U12   |
|-------|-------|--------|-------|--------|--------|-------|
| Pb(1) | 5(1)  | 9(1)   | 10(1) | 0      | 0      | -2(1) |
| Pb(2) | 9(1)  | 9(1)   | 3(1)  | 0      | 0      | 0     |
| O(1)  | 20(3) | 113(7) | 83(6) | -89(6) | -32(3) | 39(4) |
