# Supplementary material for: M6O4(OH)4 of M = Sn, Pb: Single Crystal Growth and Crystal Structure Determinations Far Away from Routine
Source: MDPI journal article supplement (doi:10.3390/cryst13050739), 2023-04-27
Supplement: s1 [file s1 › crystals-2348544-supplementary/Tabellen Pb6O4(OH)4_II.pdf]

Table 1. Crystal data and structure refinement for Pb<sub>6</sub>O<sub>4</sub>(OH)<sub>4</sub>\_II.

|                                   |                                                   |
|-----------------------------------|---------------------------------------------------|
| Identification code               | KP2002_0m_d                                       |
| Empirical formula                 | H <sub>4</sub> O <sub>8</sub> Pb <sub>6</sub>     |
| Formula weight                    | 1375.17                                           |
| Temperature                       | 100(2) K                                          |
| Wavelength                        | 0.71073 Å                                         |
| Crystal system, space group       | Tetragonal, P4/mnc                                |
| Unit cell dimensions              | a = 7.9693(3) Å<br>c = 9.2741(3) Å                |
| Volume                            | 589.00(5) Å <sup>3</sup>                          |
| Z, Calculated density             | 2, 7.754 Mg/m <sup>3</sup>                        |
| Absorption coefficient            | 85.455 mm <sup>-1</sup>                           |
| F(000)                            | 1120                                              |
| Crystal size                      | 0.020 x 0.010 x 0.010 mm                          |
| Theta range for data collection   | 3.371 to 34.939 deg.                              |
| Limiting indices                  | -12 ≤ h ≤ 12, -12 ≤ k ≤ 12, -14 ≤ l ≤ 14          |
| Reflections collected / unique    | 108784 / 689 [R(int) = 0.0993]                    |
| Completeness to theta = 25.242    | 100.0 %                                           |
| Absorption correction             | Semi-empirical from equivalents                   |
| Refinement method                 | Full-matrix least-squares on F <sup>2</sup>       |
| Data / restraints / parameters    | 689 / 0 / 29                                      |
| Goodness-of-fit on F <sup>2</sup> | 1.228                                             |
| Final R indices [I > 2σ(I)]       | R <sub>1</sub> = 0.0147, wR <sub>2</sub> = 0.0324 |
| R indices (all data)              | R <sub>1</sub> = 0.0164, wR <sub>2</sub> = 0.0327 |
| Extinction coefficient            | 0.00142(7)                                        |
| Largest diff. peak and hole       | 1.496 and -1.939 e.Å <sup>-3</sup>                |

Table 2. Atomic coordinates ( $\times 10^4$ ) and equivalent isotropic displacement parameters ( $\text{\AA}^2 \times 10^3$ ) for  $\text{Pb}_6\text{O}_4(\text{OH})_4\text{_{II}}$ .  $U(\text{eq})$  is defined as one third of the trace of the orthogonalized  $U_{ij}$  tensor.

|       | x       | y       | z       | $U(\text{eq})$ |
|-------|---------|---------|---------|----------------|
| Pb(1) | 8000(1) | 6336(1) | 5000    | 8(1)           |
| Pb(2) | 5000    | 5000    | 2213(1) | 7(1)           |
| O(1)  | 6001(8) | 7614(8) | 3286(7) | 8(1)           |
| O(2)  | 5766(7) | 6975(8) | 3742(7) | 8(1)           |

Table 3. Bond lengths [Å] and angles [deg] for Pb6O4(OH)4\_II.

|                     |          |
|---------------------|----------|
| Pb(1)-O(2)          | 2.188(6) |
| Pb(1)-O(2)#1        | 2.188(6) |
| Pb(1)-O(2)#2        | 2.199(6) |
| Pb(1)-O(2)#3        | 2.199(6) |
| Pb(1)-O(1)#2        | 2.468(6) |
| Pb(1)-O(1)#3        | 2.468(6) |
| Pb(1)-O(1)#1        | 2.470(6) |
| Pb(1)-O(1)          | 2.470(6) |
| Pb(2)-O(2)#2        | 2.205(6) |
| Pb(2)-O(2)#5        | 2.205(6) |
| Pb(2)-O(2)#6        | 2.205(6) |
| Pb(2)-O(2)          | 2.205(6) |
| Pb(2)-O(1)          | 2.443(6) |
| Pb(2)-O(1)#2        | 2.443(6) |
| Pb(2)-O(1)#5        | 2.443(6) |
| Pb(2)-O(1)#6        | 2.443(6) |
| O(1)-O(2)           | 0.689(7) |
| O(2)-Pb(1)-O(2)#1   | 64.4(3)  |
| O(2)-Pb(1)-O(2)#2   | 65.9(3)  |
| O(2)#1-Pb(1)-O(2)#2 | 99.1(4)  |
| O(2)-Pb(1)-O(2)#3   | 99.1(4)  |
| O(2)#1-Pb(1)-O(2)#3 | 65.9(3)  |
| O(2)#2-Pb(1)-O(2)#3 | 64.1(3)  |
| O(2)-Pb(1)-O(1)#2   | 74.4(2)  |
| O(2)#1-Pb(1)-O(1)#2 | 114.7(3) |
| O(2)#2-Pb(1)-O(1)#2 | 15.6(2)  |
| O(2)#3-Pb(1)-O(1)#2 | 73.8(2)  |
| O(2)-Pb(1)-O(1)#3   | 114.7(3) |
| O(2)#1-Pb(1)-O(1)#3 | 74.4(2)  |
| O(2)#2-Pb(1)-O(1)#3 | 73.8(2)  |
| O(2)#3-Pb(1)-O(1)#3 | 15.6(2)  |
| O(1)#2-Pb(1)-O(1)#3 | 80.2(3)  |
| O(2)-Pb(1)-O(1)#1   | 73.9(2)  |
| O(2)#1-Pb(1)-O(1)#1 | 15.5(2)  |
| O(2)#2-Pb(1)-O(1)#1 | 114.6(3) |
| O(2)#3-Pb(1)-O(1)#1 | 74.5(2)  |
| O(1)#2-Pb(1)-O(1)#1 | 130.2(3) |
| O(1)#3-Pb(1)-O(1)#1 | 79.4(3)  |
| O(2)-Pb(1)-O(1)     | 15.5(2)  |
| O(2)#1-Pb(1)-O(1)   | 73.9(2)  |
| O(2)#2-Pb(1)-O(1)   | 74.5(2)  |
| O(2)#3-Pb(1)-O(1)   | 114.6(3) |
| O(1)#2-Pb(1)-O(1)   | 79.4(3)  |
| O(1)#3-Pb(1)-O(1)   | 130.2(3) |
| O(1)#1-Pb(1)-O(1)   | 80.1(3)  |
| O(2)#2-Pb(2)-O(2)#5 | 65.6(2)  |
| O(2)#2-Pb(2)-O(2)#6 | 99.9(4)  |
| O(2)#5-Pb(2)-O(2)#6 | 65.6(2)  |
| O(2)#2-Pb(2)-O(2)   | 65.6(2)  |
| O(2)#5-Pb(2)-O(2)   | 99.9(4)  |
| O(2)#6-Pb(2)-O(2)   | 65.6(2)  |
| O(2)#2-Pb(2)-O(1)   | 75.0(2)  |
| O(2)#5-Pb(2)-O(1)   | 115.9(3) |
| O(2)#6-Pb(2)-O(1)   | 74.6(2)  |

|                     |          |
|---------------------|----------|
| O(2)-Pb(2)-O(1)     | 16.0(2)  |
| O(2)#2-Pb(2)-O(1)#2 | 16.0(2)  |
| O(2)#5-Pb(2)-O(1)#2 | 75.0(2)  |
| O(2)#6-Pb(2)-O(1)#2 | 115.9(3) |
| O(2)-Pb(2)-O(1)#2   | 74.6(2)  |
| O(1)-Pb(2)-O(1)#2   | 80.5(1)  |
| O(2)#2-Pb(2)-O(1)#5 | 74.6(2)  |
| O(2)#5-Pb(2)-O(1)#5 | 16.0(2)  |
| O(2)#6-Pb(2)-O(1)#5 | 75.0(2)  |
| O(2)-Pb(2)-O(1)#5   | 115.9(3) |
| O(1)-Pb(2)-O(1)#5   | 131.9(3) |
| O(1)#2-Pb(2)-O(1)#5 | 80.5(1)  |
| O(2)#2-Pb(2)-O(1)#6 | 115.9(3) |
| O(2)#5-Pb(2)-O(1)#6 | 74.6(2)  |
| O(2)#6-Pb(2)-O(1)#6 | 16.0(2)  |
| O(2)-Pb(2)-O(1)#6   | 75.0(2)  |
| O(1)-Pb(2)-O(1)#6   | 80.5(1)  |
| O(1)#2-Pb(2)-O(1)#6 | 131.9(3) |
| O(1)#5-Pb(2)-O(1)#6 | 80.5(1)  |

|                    |         |
|--------------------|---------|
| Pb(2)-O(1)-Pb(1)#6 | 97.0(2) |
| Pb(2)-O(1)-Pb(1)   | 97.0(2) |
| Pb(1)#6-O(1)-Pb(1) | 97.1(2) |

|                    |          |
|--------------------|----------|
| Pb(1)-O(2)-Pb(1)#6 | 115.0(3) |
| Pb(1)-O(2)-Pb(2)   | 113.7(3) |
| Pb(1)#6-O(2)-Pb(2) | 113.3(3) |

---

Symmetry transformations used to generate equivalent atoms:

|                   |                |                |
|-------------------|----------------|----------------|
| #1 x,y,-z+1       | #2 y,-x+1,z    | #3 y,-x+1,-z+1 |
| #4 -x+1,-y+1,-z+1 | #5 -x+1,-y+1,z |                |
| #6 -y+1,x,z       |                |                |

Table 4. Anisotropic displacement parameters ( $\text{\AA}^2 \times 10^3$ ) for  $\text{Pb}_6\text{O}_4(\text{OH})_4_{\text{II}}$ .  
The anisotropic displacement factor exponent takes the form:  
 $-2 \pi^2 [ h^2 a^{*2} U_{11} + \dots + 2 h k a^* b^* U_{12} ]$

|       | U11   | U22   | U33   | U23   | U13   | U12   |
|-------|-------|-------|-------|-------|-------|-------|
| Pb(1) | 5(1)  | 9(1)  | 10(1) | 0     | 0     | -3(1) |
| Pb(2) | 9(1)  | 9(1)  | 4(1)  | 0     | 0     | 0     |
| O(1)  | 11(3) | 7(2)  | 8(3)  | 4(2)  | 4(2)  | -1(2) |
| O(2)  | 6(2)  | 10(3) | 8(2)  | -1(2) | -1(2) | 0(2)  |
