# Supplementary material for: M6O4(OH)4 of M = Sn, Pb: Single Crystal Growth and Crystal Structure Determinations Far Away from Routine
Source: MDPI journal article supplement (doi:10.3390/cryst13050739), 2023-04-27
Supplement: s1 [file s1 › crystals-2348544-supplementary/Tabellen Sn6O4(OH)4_I.pdf]

Table 1. Crystal data and structure refinement for Sn6O4(OH)4\_I.

|                                   |                                             |
|-----------------------------------|---------------------------------------------|
| Identification code               | HR514_0m                                    |
| Empirical formula                 | H4 O8 Sn6                                   |
| Formula weight                    | 844.17                                      |
| Temperature                       | 100(2) K                                    |
| Wavelength                        | 0.71073 Å                                   |
| Crystal system, space group       | Tetragonal, P4/mnc                          |
| Unit cell dimensions              | a = 7.8788(1) Å<br>c = 9.0582(2) Å          |
| Volume                            | 562.292(19) Å <sup>3</sup>                  |
| Z, Calculated density             | 2, 4.986 Mg/m <sup>3</sup>                  |
| Absorption coefficient            | 13.133 mm <sup>-1</sup>                     |
| F(000)                            | 736                                         |
| Crystal size                      | 0.075 x 0.073 x 0.073 mm                    |
| Theta range for data collection   | 3.657 to 34.963 deg.                        |
| Limiting indices                  | -12<=h<=12, -12<=k<=12, -14<=l<=14          |
| Reflections collected / unique    | 50033 / 657 [R(int) = 0.0600]               |
| Completeness to theta = 25.242    | 99.6 %                                      |
| Absorption correction             | Semi-empirical from equivalents             |
| Refinement method                 | Full-matrix least-squares on F <sup>2</sup> |
| Data / restraints / parameters    | 657 / 0 / 20                                |
| Goodness-of-fit on F <sup>2</sup> | 1.263                                       |
| Final R indices [I>2sigma(I)]     | R1 = 0.0400, wR2 = 0.0841                   |
| R indices (all data)              | R1 = 0.0401, wR2 = 0.0841                   |
| Extinction coefficient            | 0.0030(4)                                   |
| Largest diff. peak and hole       | 3.874 and -3.319 e.Å <sup>-3</sup>          |

Table 2. Atomic coordinates ( $\times 10^4$ ) and equivalent isotropic displacement parameters ( $\text{\AA}^2 \times 10^3$ ) for  $\text{Sn}_6\text{O}_4(\text{OH})_4\text{I}$ .  $U(\text{eq})$  is defined as one third of the trace of the orthogonalized  $U_{ij}$  tensor.

|       | x       | y        | z        | $U(\text{eq})$ |
|-------|---------|----------|----------|----------------|
| Sn(1) | 7930(1) | 6233(1)  | 5000     | 9(1)           |
| Sn(2) | 5000    | 5000     | 2232(1)  | 8(1)           |
| O(1)  | 5909(9) | 7177(15) | 3548(11) | 74(4)          |

Table 3. Bond lengths [Å] and angles [deg] for Sn6O4(OH)4\_I.

---

|                     |          |
|---------------------|----------|
| Sn(1)-O(1)          | 2.195(8) |
| Sn(1)-O(1)#1        | 2.195(8) |
| Sn(1)-O(1)#2        | 2.221(8) |
| Sn(1)-O(1)#3        | 2.221(8) |
| Sn(2)-O(1)#2        | 2.208(8) |
| Sn(2)-O(1)#4        | 2.208(8) |
| Sn(2)-O(1)#5        | 2.208(8) |
| Sn(2)-O(1)          | 2.208(8) |
| O(1)-Sn(1)-O(1)#1   | 73.6(5)  |
| O(1)-Sn(1)-O(1)#2   | 73.1(4)  |
| O(1)#1-Sn(1)-O(1)#2 | 114.7(7) |
| O(1)-Sn(1)-O(1)#3   | 114.7(7) |
| O(1)#1-Sn(1)-O(1)#3 | 73.1(4)  |
| O(1)#2-Sn(1)-O(1)#3 | 72.7(4)  |
| O(1)#2-Sn(2)-O(1)#4 | 73.1(3)  |
| O(1)#2-Sn(2)-O(1)#5 | 114.6(7) |
| O(1)#4-Sn(2)-O(1)#5 | 73.1(3)  |
| O(1)#2-Sn(2)-O(1)   | 73.1(3)  |
| O(1)#4-Sn(2)-O(1)   | 114.6(7) |
| O(1)#5-Sn(2)-O(1)   | 73.1(3)  |
| Sn(1)-O(1)-Sn(2)    | 107.2(4) |
| Sn(1)-O(1)-Sn(1)#5  | 106.7(4) |
| Sn(2)-O(1)-Sn(1)#5  | 106.3(4) |

---

Symmetry transformations used to generate equivalent atoms:

#1 x,y,-z+1      #2 y,-x+1,z      #3 y,-x+1,-z+1

#4 -x+1,-y+1,z      #5 -y+1,x,z

Table 4. Anisotropic displacement parameters ( $\text{\AA}^2 \times 10^3$ ) for  $\text{Sn}_6\text{O}_4(\text{OH})_4\text{I}$ .  
The anisotropic displacement factor exponent takes the form:  
 $-2 \pi^2 [ h^2 a^{*2} U_{11} + \dots + 2 h k a^* b^* U_{12} ]$

|       | U11   | U22    | U33   | U23    | U13    | U12   |
|-------|-------|--------|-------|--------|--------|-------|
| Sn(1) | 6(1)  | 11(1)  | 11(1) | 0      | 0      | -2(1) |
| Sn(2) | 10(1) | 10(1)  | 5(1)  | 0      | 0      | 0     |
| O(1)  | 25(3) | 115(8) | 82(6) | -86(6) | -37(4) | 44(4) |
