# Supplementary material for: M6O4(OH)4 of M = Sn, Pb: Single Crystal Growth and Crystal Structure Determinations Far Away from Routine
Source: MDPI journal article supplement (doi:10.3390/cryst13050739), 2023-04-27
Supplement: s1 [file s1 › crystals-2348544-supplementary/Tabellen Sn6O4(OH)4_II.pdf]

Table 1. Crystal data and structure refinement for Sn6O4(OH)4\_II.

|                                   |                                             |
|-----------------------------------|---------------------------------------------|
| Identification code               | HR514_0m                                    |
| Empirical formula                 | H4 O8 Sn6                                   |
| Formula weight                    | 844.17                                      |
| Temperature                       | 100(2) K                                    |
| Wavelength                        | 0.71073 Å                                   |
| Crystal system, space group       | Tetragonal, P4/mnc                          |
| Unit cell dimensions              | a = 7.87880(10) Å<br>c = 9.0582(2) Å        |
| Volume                            | 562.292(19) Å <sup>3</sup>                  |
| Z, Calculated density             | 2, 4.986 Mg/m <sup>3</sup>                  |
| Absorption coefficient            | 13.133 mm <sup>-1</sup>                     |
| F(000)                            | 736                                         |
| Crystal size                      | 0.075 x 0.073 x 0.073 mm                    |
| Theta range for data collection   | 3.657 to 34.963 deg.                        |
| Limiting indices                  | -12<=h<=12, -12<=k<=12, -14<=l<=14          |
| Reflections collected / unique    | 50033 / 657 [R(int) = 0.0600]               |
| Completeness to theta = 25.242    | 99.6 %                                      |
| Absorption correction             | Semi-empirical from equivalents             |
| Refinement method                 | Full-matrix least-squares on F <sup>2</sup> |
| Data / restraints / parameters    | 657 / 0 / 30                                |
| Goodness-of-fit on F <sup>2</sup> | 1.557                                       |
| Final R indices [I>2sigma(I)]     | R1 = 0.0220, wR2 = 0.0605                   |
| R indices (all data)              | R1 = 0.0221, wR2 = 0.0605                   |
| Extinction coefficient            | 0.0028(3)                                   |
| Largest diff. peak and hole       | 1.709 and -1.596 e.Å <sup>-3</sup>          |

Table 2. Atomic coordinates ( $\times 10^4$ ) and equivalent isotropic displacement parameters ( $\text{\AA}^2 \times 10^3$ ) for  $\text{Sn}_6\text{O}_4(\text{OH})_4\text{_{II}}$ .  $U(\text{eq})$  is defined as one third of the trace of the orthogonalized  $U_{ij}$  tensor.

|       | x       | y       | z       | $U(\text{eq})$ |
|-------|---------|---------|---------|----------------|
| Sn(1) | 7929(1) | 6233(1) | 5000    | 9(1)           |
| Sn(2) | 5000    | 5000    | 2232(1) | 8(1)           |
| O(1)  | 6046(8) | 7494(9) | 3319(8) | 9(1)           |
| O(2)  | 5770(8) | 6845(8) | 3785(7) | 8(1)           |

Table 3. Bond lengths [Å] and angles [deg] for Sn6O4(OH)4\_II.

---

|                     |          |
|---------------------|----------|
| Sn(1)-O(2)#1        | 2.083(6) |
| Sn(1)-O(2)          | 2.083(6) |
| Sn(1)-O(2)#2        | 2.105(6) |
| Sn(1)-O(2)#3        | 2.105(6) |
| Sn(1)-O(1)          | 2.347(7) |
| Sn(1)-O(1)#1        | 2.347(7) |
| Sn(1)-O(1)#2        | 2.379(7) |
| Sn(1)-O(1)#3        | 2.379(7) |
| Sn(2)-O(2)          | 2.112(6) |
| Sn(2)-O(2)#2        | 2.112(6) |
| Sn(2)-O(2)#4        | 2.112(6) |
| Sn(2)-O(2)#5        | 2.112(6) |
| Sn(2)-O(1)          | 2.347(7) |
| Sn(2)-O(1)#2        | 2.347(7) |
| Sn(2)-O(1)#4        | 2.347(7) |
| Sn(2)-O(1)#5        | 2.347(7) |
| O(1)-O(2)           | 0.697(8) |
| O(2)#1-Sn(1)-O(2)   | 63.8(3)  |
| O(2)#1-Sn(1)-O(2)#2 | 96.8(4)  |
| O(2)-Sn(1)-O(2)#2   | 64.3(3)  |
| O(2)#1-Sn(1)-O(2)#3 | 64.3(3)  |
| O(2)-Sn(1)-O(2)#3   | 96.8(4)  |
| O(2)#2-Sn(1)-O(2)#3 | 63.1(3)  |
| O(2)#1-Sn(1)-O(1)   | 74.2(2)  |
| O(2)-Sn(1)-O(1)     | 16.8(2)  |
| O(2)#2-Sn(1)-O(1)   | 73.8(2)  |
| O(2)#3-Sn(1)-O(1)   | 113.6(3) |
| O(2)#1-Sn(1)-O(1)#1 | 16.8(2)  |
| O(2)-Sn(1)-O(1)#1   | 74.2(2)  |
| O(2)#2-Sn(1)-O(1)#1 | 113.6(3) |
| O(2)#3-Sn(1)-O(1)#1 | 73.8(2)  |
| O(1)-Sn(1)-O(1)#1   | 80.9(3)  |
| O(2)#1-Sn(1)-O(1)#2 | 113.3(3) |
| O(2)-Sn(1)-O(1)#2   | 73.7(2)  |
| O(2)#2-Sn(1)-O(1)#2 | 16.5(2)  |
| O(2)#3-Sn(1)-O(1)#2 | 73.2(2)  |
| O(1)-Sn(1)-O(1)#2   | 79.2(3)  |
| O(1)#1-Sn(1)-O(1)#2 | 130.1(3) |
| O(2)#1-Sn(1)-O(1)#3 | 73.7(2)  |
| O(2)-Sn(1)-O(1)#3   | 113.3(3) |
| O(2)#2-Sn(1)-O(1)#3 | 73.2(2)  |
| O(2)#3-Sn(1)-O(1)#3 | 16.5(2)  |
| O(1)-Sn(1)-O(1)#3   | 130.1(3) |
| O(1)#1-Sn(1)-O(1)#3 | 79.2(3)  |
| O(1)#2-Sn(1)-O(1)#3 | 79.6(3)  |
| O(2)-Sn(2)-O(2)#2   | 63.7(2)  |
| O(2)-Sn(2)-O(2)#4   | 96.5(4)  |
| O(2)#2-Sn(2)-O(2)#4 | 63.7(2)  |
| O(2)-Sn(2)-O(2)#5   | 63.7(2)  |
| O(2)#2-Sn(2)-O(2)#5 | 96.5(4)  |
| O(2)#4-Sn(2)-O(2)#5 | 63.7(2)  |
| O(2)-Sn(2)-O(1)     | 16.9(2)  |
| O(2)#2-Sn(2)-O(1)   | 73.7(2)  |
| O(2)#4-Sn(2)-O(1)   | 113.4(3) |

|                     |          |
|---------------------|----------|
| O(2)#5-Sn(2)-O(1)   | 73.8(2)  |
| O(2)-Sn(2)-O(1)#2   | 73.8(2)  |
| O(2)#2-Sn(2)-O(1)#2 | 16.9(2)  |
| O(2)#4-Sn(2)-O(1)#2 | 73.7(2)  |
| O(2)#5-Sn(2)-O(1)#2 | 113.4(3) |
| O(1)-Sn(2)-O(1)#2   | 79.9(1)  |
| O(2)-Sn(2)-O(1)#4   | 113.4(3) |
| O(2)#2-Sn(2)-O(1)#4 | 73.8(2)  |
| O(2)#4-Sn(2)-O(1)#4 | 16.9(2)  |
| O(2)#5-Sn(2)-O(1)#4 | 73.7(2)  |
| O(1)-Sn(2)-O(1)#4   | 130.4(3) |
| O(1)#2-Sn(2)-O(1)#4 | 79.9(1)  |
| O(2)-Sn(2)-O(1)#5   | 73.7(2)  |
| O(2)#2-Sn(2)-O(1)#5 | 113.4(3) |
| O(2)#4-Sn(2)-O(1)#5 | 73.8(2)  |
| O(2)#5-Sn(2)-O(1)#5 | 16.9(2)  |
| O(1)-Sn(2)-O(1)#5   | 79.9(1)  |
| O(1)#2-Sn(2)-O(1)#5 | 130.4(3) |
| O(1)#4-Sn(2)-O(1)#5 | 79.9(1)  |
|                     |          |
| Sn(1)-O(1)-Sn(2)    | 98.1(3)  |
| Sn(1)-O(1)-Sn(1)#5  | 97.1(3)  |
| Sn(2)-O(1)-Sn(1)#5  | 97.1(2)  |
|                     |          |
| O(2)-O(1)-H(1)      | 171.3    |
| Sn(1)-O(1)-H(1)     | 116.3    |
| Sn(2)-O(1)-H(1)     | 112.8    |
| Sn(1)#5-O(1)-H(1)   | 129.8    |
|                     |          |
| O(1)-O(2)-Sn(1)     | 103.6(8) |
| O(1)-O(2)-Sn(1)#5   | 104.6(8) |
| Sn(1)-O(2)-Sn(1)#5  | 115.5(3) |
|                     |          |
| O(1)-O(2)-Sn(2)     | 101.0(8) |
| Sn(1)-O(2)-Sn(2)    | 115.3(3) |
| Sn(1)#5-O(2)-Sn(2)  | 114.3(3) |

---

Symmetry transformations used to generate equivalent atoms:

#1 x,y,-z+1      #2 y,-x+1,z      #3 y,-x+1,-z+1  
#4 -x+1,-y+1,z      #5 -y+1,x,z

Table 4. Anisotropic displacement parameters ( $\text{\AA}^2 \times 10^3$ ) for  $\text{Sn}_6\text{O}_4(\text{OH})_4\text{_{II}}$ .  
The anisotropic displacement factor exponent takes the form:  
 $-2 \pi^2 [ h^2 a^{*2} U_{11} + \dots + 2 h k a^* b^* U_{12} ]$

|       | U11   | U22   | U33   | U23  | U13  | U12   |
|-------|-------|-------|-------|------|------|-------|
| Sn(1) | 6(1)  | 10(1) | 11(1) | 0    | 0    | -2(1) |
| Sn(2) | 10(1) | 10(1) | 5(1)  | 0    | 0    | 0     |
| O(1)  | 9(2)  | 8(2)  | 11(2) | 3(2) | 3(2) | -2(2) |
| O(2)  | 6(2)  | 9(3)  | 9(2)  | 0(2) | 2(2) | -1(2) |

Table 5. Hydrogen coordinates (  $\times 10^4$ ) and isotropic displacement parameters ( $\text{\AA}^2 \times 10^3$ ) for  $\text{Sn}_6\text{O}_4(\text{OH})_4\text{_{II}}$ .

|      | x    | y    | z    | U (eq)  |
|------|------|------|------|---------|
| H(1) | 6617 | 8383 | 2500 | 10 (20) |

Table 6. Hydrogen bonds for Sn6O4(OH)4\_II [Å and deg.].

| D-H...A            | d(D-H) | d(H...A) | d(D...A)  | <(DHA) |
|--------------------|--------|----------|-----------|--------|
| O(1)-H(1)...O(2)#6 | 1.12   | 1.81     | 2.875(11) | 158.5  |

Symmetry transformations used to generate equivalent atoms:

#1 x,y,-z+1      #2 y,-x+1,z      #3 y,-x+1,-z+1      #4 -x+1,-y+1,z  
 #5 -y+1,x,z      #6 -y+3/2,-x+3/2,-z+1/2
